# Supplementary material
Source: HighWire-hosted journal article supplement (doi:10.1101/rna.078898.121)
Supplement: Supplemental_TableS2_Mapped_Reads.xlsx [file Supplemental_TableS2_Mapped_Reads.xlsx]

## Sheet: All_RawReads_with_ranks
	Control #1	Control #2	Control #3
Gene name	polyA_control_10_05_18	polyA_control_09_02_19_1	polyA_control_09_02_19_2	PolyA_Control_Pool	PolyA_Control Pool_Rank	total_ribominus_polyI_09_11_19	total_polyI_03_03_19	polyA_polyI_10_07_18	polyA_polyI_12_14_18	polyA_polyI_06_19_19	polyA_polyI_09_02_19	polyA_polyI_09_25_19_1	polyA_polyI_09_25_19_2	polyA_polyI_10_01_19	PolyAPolyI_Pool	PolyAPolyI_Pool_Rank	ChrA_polyI_09_11_19
RDN37-1	148	520	392	1060	990	17114	21806	13780	564	2187	105723	1526	70619	673	195072	1	91765
RDN37-2	160	556	396	1112	942	17301	21889	13788	563	2182	104992	1410	70985	695	194615	2	91338
RDN18-1	40	113	97	250	3252	1357	13217	8370	218	979	64628	391	24661	280	99527	3	42696
RDN18-2	34	125	105	264	3129	1385	13158	8304	189	995	64375	377	24870	268	99378	4	43039
RDN25-1	89	315	225	629	1574	1696	7150	5100	328	1193	40151	1013	42747	373	90905	5	44601
RDN25-2	108	319	217	644	1536	1617	7349	5160	354	1170	39731	911	42783	407	90516	6	44006
TDH3	26987	75046	50121	152154	1	38	100	7780	1990	2198	8249	359	2583	3191	26350	7	297
FBA1	14344	59316	40983	114643	2	81	125	4326	1733	3853	7535	318	2446	2835	23046	8	109
ENO2	14880	45279	30900	91059	4	106	97	4303	1775	3746	6338	266	2332	2502	21262	9	176
ADH1	13970	43156	28176	85302	6	140	103	4114	1719	3192	5999	249	1871	2288	19432	10	82
CCW12	13440	30551	22527	66518	7	22	177	5489	2490	2782	3581	293	943	3092	18670	11	105
RPS31	14424	47077	31098	92599	3	617	83	4356	1773	2981	3901	143	1066	3343	17563	12	54
PDC1	12066	28694	20538	61298	9	29	98	3273	1304	3112	4707	175	1747	2787	17105	13	167
TEF2	10690	30883	21259	62832	8	152	67	2649	1037	2463	5059	317	2446	2676	16647	14	111
RPS12	9372	29458	19026	57856	10	444	42	2666	996	1786	4287	236	1294	3227	14492	15	55
TEF1	9470	25253	16920	51643	13	140	74	3017	1069	2152	3371	103	1094	2863	13669	16	119
GPM1	13866	46616	29885	90367	5	38	82	3289	1623	2699	3131	118	861	1759	13480	17	71
CDC19	8404	28050	18727	55181	12	101	75	2929	979	1947	3538	102	1093	1662	12250	18	108
PGK1	7785	23212	14964	45961	15	46	44	2610	643	1352	3889	120	1110	1024	10748	19	95
TPI1	7562	29269	19091	55922	11	33	68	2203	900	1594	3118	112	918	1514	10359	20	38
RPL28	6908	23080	15397	45385	16	283	45	2219	933	1452	2281	108	766	2248	10007	21	47
TDH2	5918	24492	15807	46217	14	17	45	2006	690	1287	3491	137	925	659	9195	22	41
RPL25	5839	20296	14123	40258	17	5	44	1452	578	1108	2882	190	1183	1712	9105	23	56
RPS25A	4976	18434	12320	35730	22	108	27	1532	730	1204	2539	255	1040	1737	9037	24	13
gag-pol_20fusion_20protein	8739	11310	8195	28244	48	63	59	2555	908	2152	1884	66	671	694	8930	25	4783
RPS5	5599	17433	10787	33819	25	23	42	1614	637	1322	2497	130	909	1714	8823	26	31
RPL10	4515	13265	8647	26427	60	365	31	2098	784	1287	1768	59	744	1597	8337	27	46
ETS2-1	6	22	15	43	4996	80	200	295	8	32	3624	111	4170	37	8277	28	5065
ETS2-2	10	26	22	58	4933	73	189	320	8	38	3494	97	4083	34	8074	29	4916
CWP2	4386	12878	9406	26670	58	11	39	1608	544	715	2509	266	1027	1085	7754	30	21
RPS2	6003	16252	10321	32576	30	128	39	1626	725	1311	1694	89	555	1696	7696	31	41
RPS20	6655	19885	12996	39536	18	119	32	1893	810	1455	1307	64	376	1750	7655	32	29
RPS3	5965	18273	11987	36225	21	58	47	1679	730	1358	1450	49	417	1585	7268	33	38
RPS23B	5279	17748	11445	34472	24	164	26	1502	595	1086	1911	94	619	1445	7252	34	30
RPL26B	4732	14592	9420	28744	46	29	32	1430	620	1098	1892	100	653	1393	7186	35	16
RPL23B	5169	16317	9950	31436	33	189	36	1156	513	1055	2103	149	874	1182	7032	36	16
RPL15A	3063	9335	6016	18414	114	170	54	1885	854	1300	1243	79	496	1103	6960	37	31
RPL2B	4803	14019	9036	27858	51	106	26	1164	540	967	1843	164	959	1299	6936	38	40
RPL41A	6345	12765	8693	27803	52	313	38	2273	904	695	1388	86	426	1064	6836	39	20
RPL38	5632	19701	12504	37837	19	110	30	1681	687	1084	1228	72	345	1674	6771	40	10
RPS8A	4887	15598	10271	30756	35	59	35	1413	563	1062	1565	69	653	1406	6731	41	36
RPL18A	4741	13299	8822	26862	56	36	31	1333	535	958	1676	70	663	1495	6730	42	36
RPS30A	4884	16064	10850	31798	32	37	34	1482	631	1068	1672	87	521	1255	6716	43	11
TMA19	4412	17174	10776	32362	31	243	32	1254	557	931	1776	107	599	1347	6571	44	28
RPP2B	5744	18009	11774	35527	23	17	24	1703	679	1107	1072	48	386	1554	6549	45	14
RPL30	5768	18453	12298	36519	20	36	43	1921	874	1196	830	42	281	1402	6546	46	17
RPL32	5215	15379	10599	31193	34	6	41	1523	520	906	1418	82	467	1574	6490	47	29
RPS24A	4092	14316	9709	28117	49	36	25	1063	509	963	1742	148	777	1211	6413	48	10
RPL36B	4638	15465	10464	30567	36	6	25	1102	524	930	1827	86	604	1336	6409	49	25
RPL40A	5112	16752	11010	32874	29	48	41	1428	610	910	1394	100	495	1438	6375	50	28
RPP0	4823	11308	7467	23598	72	45	37	1531	612	1135	1313	68	412	1273	6344	51	48
RPS9B	4658	14167	9466	28291	47	19	32	1471	646	1011	1030	31	375	1622	6186	52	24
RPS1B	4111	13117	8529	25757	63	99	29	1113	411	947	1744	85	654	1126	6080	53	42
ASC1	4014	11568	8008	23590	73	234	32	1610	443	1009	1335	50	377	1249	6073	54	44
RPS10A	5062	13280	8853	27195	55	29	32	1286	630	995	1654	90	449	944	6048	55	17
RPL3	5175	14715	9417	29307	39	218	27	2033	540	797	1048	49	384	1167	6018	56	50
RPS15	4190	13132	8593	25915	62	6	24	1226	529	857	1389	128	612	1143	5884	57	32
RPS13	4339	14238	9117	27694	53	16	42	1313	417	787	1394	92	469	1371	5843	58	31
RPS26A	4506	17238	11866	33610	26	1	33	1272	503	863	1219	59	429	1437	5782	59	45
RPL33A	4101	12337	8111	24549	68	18	24	1057	419	810	1544	108	601	1212	5751	60	19
RPS22A	4384	13173	8912	26469	59	21	32	1522	587	989	1121	67	322	1095	5703	61	22
RPS17A	3306	10548	6998	20852	100	127	32	1182	526	878	1407	62	442	1194	5691	62	27
RPS28A	4605	14222	9254	28081	50	37	13	1198	559	794	1552	99	459	1001	5662	63	12
RPS23A	3713	12245	7349	23307	78	141	24	1006	395	875	1598	94	616	1073	5657	64	15
RPL14A	4472	15161	10195	29828	38	50	24	1261	550	912	1273	56	395	1195	5642	65	34
RPL27A	4762	14803	9630	29195	41	243	41	1156	594	1062	1308	66	407	1026	5619	66	12
RPL42B	4583	14582	9730	28895	44	161	38	1207	560	860	1234	61	331	1205	5458	67	14
RPS6A	3157	9966	6489	19612	106	75	23	983	364	846	1418	81	680	1033	5405	68	25
RPS21A	4229	13131	8834	26194	61	71	23	1032	501	828	1377	100	521	1005	5364	69	13
ITS1-1	8	32	25	65	4896	123	401	299	7	31	3251	33	1609	27	5257	70	6569
RDN58-2	21	109	71	201	3725	14117	1413	367	18	32	1156	123	3539	16	5251	71	6875
RPL7A	4311	10534	7107	21952	89	21	28	1224	522	846	1083	50	404	1121	5250	72	34
RDN58-1	24	95	69	188	3854	13867	1461	367	20	28	1242	129	3438	16	5240	73	7015
SNR24	3715	11118	7645	22478	82	163	30	1438	385	903	1081	45	328	1052	5232	74	25
RPL5	4417	10609	7420	22446	83	11	41	1253	519	1024	974	73	338	1028	5209	75	41
ITS1-2	6	35	30	71	4867	118	421	296	3	30	3194	30	1622	18	5193	76	6527
RPP1B	3930	11545	7680	23155	79	4	24	1004	477	738	1283	61	411	1127	5101	77	19
RPL40B	3647	11713	8198	23558	75	19	34	1010	395	725	1294	65	435	1161	5085	78	15
RPL31A	4202	15509	10347	30058	37	5	26	950	441	708	1382	84	488	967	5020	79	10
RPL21A	3529	11237	7457	22223	86	44	21	926	399	730	1306	96	510	1024	4991	80	25
RPS18B	3685	11680	7249	22614	81	114	19	978	367	756	1332	91	482	946	4952	81	10
RPS18A	3887	11732	7689	23308	77	44	27	1142	446	718	1102	46	343	1153	4950	82	30
RPS30B	4298	10226	7370	21894	90	7	18	1083	441	647	1406	103	372	894	4946	83	6
RPS17B	3437	9711	6283	19431	108	120	26	860	356	779	1406	72	378	1075	4926	84	9
RPL1B	3732	11057	7046	21835	92	167	19	1486	521	847	731	36	207	1079	4907	85	44
RPL12B	3801	11865	8122	23788	71	5	21	1016	358	678	1225	60	638	906	4881	86	16
RPP2A	2893	9712	6941	19546	107	9	41	1211	547	971	772	19	223	1114	4857	87	27
RPS27B	4700	9598	7072	21370	96	20	27	1475	533	631	1059	46	195	901	4840	88	13
RPS4A	3598	10307	6995	20900	99	77	35	1070	470	786	1101	48	354	937	4766	89	41
RPL20B	3919	11844	7618	23381	76	9	17	945	440	748	1246	65	370	923	4737	90	20
RPL24A	3237	11834	7858	22929	80	5	27	1021	487	729	1125	61	409	903	4735	91	15
RPS1A	3447	11281	7113	21841	91	67	24	823	372	750	1306	87	582	812	4732	92	25
RPS21B	3973	10454	7000	21427	95	9	22	1006	471	704	1013	37	209	1272	4712	93	8
RPS8B	3485	10673	6915	21073	98	13	17	856	398	711	1237	77	508	914	4701	94	28
RPL43A	4547	14564	9739	28850	45	17	34	1149	549	690	838	52	238	1177	4693	95	19
HOR7	3104	13478	8695	25277	66	6	24	646	348	713	1941	134	785	113	4680	96	4
RPS16A	3272	11622	7382	22276	85	68	25	765	351	632	1305	126	547	943	4669	97	17
RPL34B	3708	12640	8719	25067	67	6	26	1091	473	786	928	48	300	996	4622	98	15
RPS14A	4092	15092	9816	29000	43	6	37	1205	548	766	681	43	248	1091	4582	99	23
RPL21B	3206	10078	6445	19729	105	7	28	825	393	618	1279	53	454	952	4574	100	19
RPL9A	4572	14843	9595	29010	42	210	24	1210	514	853	651	32	202	1050	4512	101	18
RPL37B	3463	9950	6576	19989	104	11	17	962	345	554	1157	62	272	1063	4415	102	11
RPL11A	3581	10884	7289	21754	94	54	20	1046	372	699	992	18	290	971	4388	103	16
RPS7A	4155	13974	8655	26784	57	140	27	1039	470	888	759	41	253	906	4356	104	24
RPL39	7756	12042	9436	29234	40	50	28	1393	881	733	492	35	125	626	4285	105	4
RPL35A	3824	13417	8470	25711	64	30	16	800	399	623	1053	56	382	962	4275	106	7
HHT2	2229	7926	5372	15527	131	49	22	670	296	486	1373	27	473	930	4255	107	13
RPL19B	3812	11534	8215	23561	74	15	21	1019	405	751	785	24	249	1012	4245	108	25
SNR39	3869	9917	6630	20416	102	9	19	973	414	707	851	46	355	895	4241	109	20
RPL8B	3689	11128	7396	22213	87	5	26	1058	462	746	813	26	210	873	4188	110	34
RPL1A	2853	9419	5915	18187	116	46	31	800	307	620	1158	45	298	924	4152	111	25
RPL22A	4065	12337	8109	24511	69	76	21	1093	521	701	660	29	165	959	4128	112	5
RPL16B	3001	9879	6454	19334	109	24	38	1014	333	669	777	42	273	1015	4123	113	26
RPL37A	3238	10289	7009	20536	101	2	28	779	393	574	1124	64	323	852	4109	114	7
ENO1	2274	18700	12381	33355	27	4	26	735	292	497	1865	67	526	118	4100	115	10
RPL29	4925	11236	8116	24277	70	171	14	1245	559	470	797	38	138	837	4084	116	4
RPP1A	4424	13999	8900	27323	54	23	19	1052	582	809	494	40	170	929	4076	117	13
RPS6B	2159	7114	4267	13540	144	66	8	763	294	605	1125	79	487	707	4060	118	34
EFB1	3968	9778	6526	20272	103	19	12	1030	380	646	771	23	219	985	4054	119	51
RPS19B	3150	10885	7312	21347	97	59	25	905	417	629	836	39	330	885	4041	120	24
RPL42A	3716	11188	7469	22373	84	61	24	787	354	607	1102	64	278	842	4034	121	17
TSA1	2946	9203	5163	17312	121	6	22	667	271	596	1260	85	535	551	3965	122	16
PMA1	1919	2573	1712	6204	230	11	18	992	326	832	874	67	499	359	3949	123	82
RPL41B	6047	16066	10853	32966	28	261	13	1487	501	428	682	23	149	666	3936	124	2
RPS16B	3101	9724	6072	18897	112	23	28	808	321	602	1006	45	290	846	3918	125	23
ZEO1	3644	7197	4699	15540	130	58	13	749	369	687	980	95	436	583	3899	126	6
RPL43B	3518	8611	5747	17876	117	126	34	941	351	594	883	55	255	722	3801	127	3
CPR1	3980	11143	7000	22123	88	20	32	1003	460	730	783	40	243	511	3770	128	18
RPS4B	2772	7522	4969	15263	134	81	29	847	318	642	744	39	221	897	3708	129	29
RPS10B	3391	8640	6351	18382	115	30	20	935	475	629	719	54	205	653	3670	130	6
RPL6A	3132	11362	7286	21780	93	5	29	920	396	641	707	31	194	767	3656	131	14
RPS0A	2942	7967	4744	15653	129	7	16	668	255	580	956	87	443	661	3650	132	14
RPL13B	4107	12682	8596	25385	65	33	29	886	410	656	594	27	206	862	3641	133	20
YEF3	1885	4922	3446	10253	173	104	21	730	283	756	857	43	350	621	3640	134	143
RPL24B	2482	8966	5930	17378	120	48	13	703	312	537	955	44	286	802	3639	135	10
RPL23A	2434	8264	5137	15835	127	97	14	578	284	558	906	82	421	799	3628	136	14
RPS19A	2413	8316	5514	16243	126	18	9	618	248	467	1018	55	346	855	3607	137	14
RPL2A	2826	8152	5312	16290	125	45	15	700	322	636	811	40	325	731	3565	138	25
RPL17A	2936	8636	5972	17544	118	5	22	889	347	622	682	29	211	757	3537	139	12
AHP1	3801	6102	3854	13757	143	1	23	1001	408	790	662	37	203	435	3536	140	14
RPL4A	3724	9269	6232	19225	110	11	20	1109	529	851	380	15	117	440	3441	141	26
STM1	3100	9902	6147	19149	111	50	13	685	292	636	826	31	302	653	3425	142	16
RPL12A	2459	8459	5377	16295	124	22	10	709	268	481	815	44	271	747	3335	143	16
HTA1	2183	6391	4312	12886	148	5	13	665	298	443	711	39	253	915	3324	144	4
SSB1	2496	7327	4922	14745	136	54	14	746	282	662	719	23	199	651	3282	145	60
BMH1	1857	5158	3376	10391	171	11	10	519	198	498	1134	54	384	459	3246	146	9
RPL20A	2612	8539	5516	16667	123	6	21	653	270	448	835	36	250	732	3224	147	17
PSA1	2103	5909	4026	12038	156	67	13	567	220	543	837	70	381	602	3220	148	20
PMP2	1048	3196	2009	6253	227	14	15	919	228	336	932	36	343	404	3198	149	7
RPS26B	2241	9084	5920	17245	122	1	21	615	316	517	792	37	259	632	3168	150	12
HTA2	2065	6990	4425	13480	145	24	14	631	235	440	827	30	279	724	3166	151	7
VMA3	1551	4293	2894	8738	191	3	13	706	276	523	824	47	371	348	3095	152	21
HHT1	2115	5214	3408	10737	165	72	11	512	239	451	692	30	230	902	3056	153	5
RPS29B	2816	7087	5071	14974	135	4	13	746	276	386	716	44	171	635	2974	154	12
GPP1	2350	7126	4316	13792	142	0	21	596	233	393	866	56	269	526	2939	155	13
HHF1	2177	5141	3190	10508	167	11	7	507	246	402	667	40	258	755	2875	156	5
HHF2	2280	5447	3850	11577	159	10	11	658	354	523	534	23	139	634	2865	157	5
ACT1	2141	7162	4575	13878	141	5	21	696	211	516	851	44	195	334	2847	158	33
RPS0B	2080	5819	3702	11601	158	8	15	570	183	440	663	33	278	614	2781	159	26
RPL35B	1997	7330	4840	14167	138	13	12	506	257	400	728	42	258	589	2780	160	7
RPS11A	2599	6849	4503	13951	140	4	17	642	285	426	562	28	166	617	2726	161	18
RPL19A	2692	8849	5904	17445	119	9	15	719	349	562	383	21	140	550	2724	162	21
HYP2	1085	3494	2282	6861	221	9	15	756	359	499	420	27	135	488	2684	163	19
RPL16A	2115	6702	4370	13187	147	5	34	562	235	380	699	36	206	550	2668	164	13
RPL11B	2276	5629	3769	11674	157	11	19	587	258	438	578	26	170	605	2662	165	9
MRH1	1509	4451	2893	8853	188	4	15	457	195	463	836	94	361	253	2659	166	11
RPS29A	2950	7191	5159	15300	133	8	10	649	312	344	503	56	162	624	2650	167	8
GAS1	1446	3286	2171	6903	220	9	13	642	208	542	611	43	234	364	2644	168	21
EFT2	1758	3791	2629	8178	197	15	8	553	203	529	657	34	296	363	2635	169	49
RPS25B	1766	5248	3490	10504	168	16	12	499	226	419	667	36	230	552	2629	170	6
RPS11B	2608	6865	4637	14110	139	12	20	719	304	468	423	22	146	537	2619	171	17
SSA2	1205	1576	1164	3945	297	7	11	663	260	625	518	28	184	331	2609	172	46
RPL34A	2212	7986	5221	15419	132	5	20	549	225	387	654	37	183	560	2595	173	14
SNR18	3554	9158	6082	18794	113	10	4	810	223	336	549	20	168	467	2573	174	38
EGD1	1395	5272	3541	10208	175	1	13	387	188	323	783	68	386	407	2542	175	9
GCN4	1337	3430	2082	6849	222	1	8	501	178	435	734	43	293	354	2538	176	15
RPL17B	1452	4302	3050	8804	189	14	21	494	237	427	639	27	227	484	2535	177	13
PGI1	2091	6461	4279	12831	149	39	9	555	163	431	756	31	252	308	2496	178	25
gag_20protein	3766	5840	3783	13389	146	9	21	573	209	676	540	24	268	190	2480	179	1029
HSC82	2171	3653	2521	8345	193	26	14	688	291	611	408	23	124	332	2477	180	19
GLN1	923	9111	5702	15736	128	2	16	214	104	188	1229	90	466	165	2456	181	30
SOD1	2405	6090	4053	12548	151	21	11	599	255	411	611	28	186	359	2449	182	9
EGD2	1359	5097	3343	9799	179	0	13	385	163	365	644	71	311	484	2423	183	4
RPL33B	2124	5136	3178	10438	170	63	11	438	183	323	623	66	252	526	2411	184	6
RPL14B	1572	4739	3125	9436	181	23	12	375	166	329	655	60	277	523	2385	185	7
RPL13A	1841	5239	3709	10789	164	2	13	515	208	325	561	35	202	534	2380	186	11
SSB2	1578	4682	3125	9385	183	30	21	588	232	540	448	17	132	421	2378	187	47
SED1	2030	6407	4019	12456	152	0	14	351	133	265	982	70	442	133	2376	188	10
HSP150	1705	4870	3229	9804	178	0	13	434	152	311	809	68	370	227	2371	189	16
HTB1	2002	6450	4178	12630	150	1	11	398	211	306	591	37	215	608	2366	190	2
RPL27B	2187	6035	3817	12039	155	18	11	534	215	368	526	34	176	506	2359	191	9
PMP1	1159	4333	2750	8242	196	2	16	574	207	380	589	33	224	326	2333	192	9
RPS28B	2266	6090	3854	12210	153	40	2	894	182	202	340	22	223	383	2246	193	1
HXT7	447	5110	3486	9043	186	3	13	142	65	142	1237	83	548	5	2222	194	1
PMP3	1247	3623	2364	7234	212	3	12	402	179	239	855	46	223	265	2209	195	3
TIF1	900	2821	2072	5793	238	21	11	442	215	328	574	44	287	305	2195	196	26
RPL26A	2269	5876	3995	12140	154	8	14	465	219	339	419	21	143	577	2183	197	9
TEF4	1738	4669	2875	9282	184	5	12	474	189	375	511	18	176	428	2171	198	29
RPL6B	1212	3520	2371	7103	216	11	16	452	178	330	479	28	277	403	2147	199	25
HXK2	1076	4285	2896	8257	195	17	12	430	159	346	647	43	295	206	2126	200	9
ECM33	1369	3189	2058	6616	224	3	12	418	153	364	596	44	244	274	2093	201	27
BGL2	1216	3856	2522	7594	208	1	15	435	210	333	606	38	224	234	2080	202	5
RPS27A	1643	4670	3082	9395	182	4	15	444	185	353	456	19	148	462	2067	203	4
MMF1	1545	6046	3705	11296	160	12	8	388	155	296	621	17	158	361	1996	204	12
GSP1	1466	4509	2886	8861	187	4	17	448	145	301	477	18	127	405	1921	205	13
HXT3	1421	1939	1249	4609	275	14	6	549	190	326	271	15	99	440	1890	206	35
TIF2	1336	3829	2694	7859	204	6	10	433	146	304	487	25	124	369	1888	207	13
UTH1	611	1452	942	3005	387	3	8	483	166	301	415	31	203	283	1882	208	15
RPL4B	1682	3796	2425	7903	201	2	11	442	205	367	353	21	136	336	1860	209	15
COF1	1423	5307	3380	10110	177	13	12	362	168	302	489	28	163	337	1849	210	7
RPS22B	1156	3612	2403	7171	214	89	9	297	135	249	566	33	155	404	1839	211	304
ARF1	1580	5733	3721	11034	163	42	19	368	133	287	470	16	143	409	1826	212	3
RPL8A	1228	4210	2617	8055	199	4	11	407	150	317	421	17	143	317	1772	213	18
CIS3	1304	3413	2060	6777	223	4	10	383	164	297	444	26	139	315	1768	214	11
GIS2	997	3161	2077	6235	229	14	11	244	105	198	631	22	192	351	1743	215	0
RPS7B	1269	3999	2583	7851	205	3	5	385	148	272	359	23	133	379	1699	216	15
SNR44	1109	3522	2317	6948	219	86	8	267	125	233	510	30	151	371	1687	217	302
SUI1	1110	4010	2780	7900	202	4	8	280	136	201	519	38	187	298	1659	218	5
CUP1-1	1803	5588	3744	11135	162	13	9	327	187	245	495	32	155	185	1626	219	5
FPR1	1505	4893	3170	9568	180	9	9	304	151	254	437	20	138	311	1615	220	6
HTB2	1294	2714	1729	5737	241	1	5	303	101	203	296	22	113	556	1594	221	7
ADK1	728	2792	1705	5225	252	16	10	270	143	256	489	19	181	233	1591	222	9
CUP1-2	1891	5476	3790	11157	161	11	11	319	202	201	485	44	146	192	1589	223	4
NCE102	1487	2759	1786	6032	235	0	11	396	149	279	439	29	181	110	1583	224	2
TDH1	925	8104	5329	14358	137	1	19	374	155	262	546	36	186	9	1568	225	5
MBF1	1322	2584	1642	5548	247	4	5	574	157	252	277	8	112	176	1556	226	7
TRX2	1464	4584	2708	8756	190	9	11	289	127	220	507	41	170	191	1545	227	3
NTF2	1073	3713	2435	7221	213	5	7	306	138	260	396	12	109	289	1510	228	7
PHO84	437	4682	3208	8327	194	0	16	112	48	106	679	35	263	250	1493	229	19
RPS24B	1494	3894	2409	7797	206	1	19	445	180	248	254	9	50	307	1493	230	9
BAT1	798	2082	1261	4141	288	4	4	218	77	194	623	19	183	168	1482	231	3
RPL31B	1352	3741	2701	7794	207	1	8	350	191	232	270	16	99	305	1463	232	1
SSA1	901	2251	1626	4778	268	4	12	430	214	392	218	13	68	95	1430	233	25
SNR38	1396	4078	2454	7928	200	0	7	332	117	259	297	13	116	269	1403	234	14
CTS1	1081	1890	1210	4181	283	1	5	301	110	195	344	33	173	246	1402	235	9
ACB1	1117	4736	3202	9055	185	1	8	322	108	186	435	16	111	213	1391	236	6
APE3	754	1769	1289	3812	306	2	13	343	151	279	307	7	59	239	1385	237	5
SEC53	996	2500	1633	5129	253	36	2	246	104	195	429	17	132	261	1384	238	8
ILV5	601	2531	1695	4827	265	5	6	231	97	197	386	16	195	262	1384	239	23
SND3	959	2751	1801	5511	248	32	8	441	195	291	182	16	44	194	1363	240	4
RPL36A	1597	5268	3431	10296	172	1	12	352	173	254	209	8	54	308	1358	241	4
HXT4	307	5890	4046	10243	174	0	16	95	37	54	801	47	263	15	1312	242	2
NOP10	1117	3715	2548	7380	211	20	3	289	153	170	315	18	77	283	1305	243	1
TIP1	833	3856	2397	7086	217	0	6	211	74	125	496	42	221	121	1290	244	2
TRX1	1179	4046	2657	7882	203	15	7	299	123	195	335	25	101	205	1283	245	10
EFT1	1215	2861	2068	6144	231	13	12	387	132	319	220	6	55	162	1281	246	42
SUB2	782	2145	1492	4419	279	17	9	245	99	233	300	3	81	278	1239	247	8
YRB1	889	3309	2095	6293	226	21	10	290	144	195	241	10	74	281	1235	248	3
PFY1	1065	4001	2461	7527	209	10	8	254	112	196	363	16	107	184	1232	249	4
SNU13	989	2706	1955	5650	244	2	7	201	99	175	290	11	87	363	1226	250	6
TMA7	1019	3010	2089	6118	234	31	6	289	136	183	320	12	85	200	1225	251	1
SRL1	884	1661	1123	3668	318	0	5	217	54	166	405	41	172	162	1217	252	7
VTC1	740	4777	3192	8709	192	2	16	205	86	131	407	18	148	202	1197	253	7
URA1	679	3078	1910	5667	243	47	5	187	76	112	285	14	89	416	1179	254	0
IPP1	981	3602	2438	7021	218	0	10	324	160	244	190	9	46	181	1154	255	13
PDI1	1051	3116	1969	6136	232	1	3	256	102	234	311	9	87	151	1150	256	8
CDC33	825	2778	1698	5301	250	9	8	232	88	170	295	15	85	248	1133	257	5
OLA1	923	2293	1576	4792	266	5	5	281	107	213	248	11	58	197	1115	258	10
SAH1	848	2827	1943	5618	245	2	5	233	67	185	272	31	111	193	1092	259	8
RPL9B	915	2338	1498	4751	269	11	10	275	131	220	208	8	56	193	1091	260	21
KRS1	784	2425	1582	4791	267	6	2	283	98	215	216	6	57	213	1088	261	11
SCW4	386	1068	638	2092	534	0	13	283	126	195	272	15	81	100	1072	262	10
YNL190W	168	444	278	890	1165	0	10	200	76	158	383	19	182	52	1070	263	7
TIF11	784	3076	2007	5867	237	6	2	242	85	180	228	24	83	223	1065	264	2
OLE1	433	3052	2064	5549	246	15	15	122	70	142	452	26	162	84	1058	265	9
SSE1	837	1579	1141	3557	330	11	4	217	108	202	250	9	112	155	1053	266	19
STF2	802	5898	3740	10440	169	3	11	183	86	111	446	33	175	17	1051	267	2
HXT2	559	1740	1164	3463	342	4	8	211	77	146	347	22	136	111	1050	268	4
HSP104	1029	2783	1953	5765	240	2	7	265	132	207	312	15	105	12	1048	269	9
SSS1	897	3088	2150	6135	233	0	3	223	97	164	268	14	86	193	1045	270	3
POR1	839	3911	2401	7151	215	1	13	211	92	167	349	18	118	88	1043	271	9
ADE13	539	2905	1839	5283	251	13	2	153	82	133	374	11	104	182	1039	272	4
MFA2	735	1096	739	2570	445	1	10	246	130	89	312	42	96	115	1030	273	2
EXG1	666	1978	1275	3919	300	3	4	210	66	169	283	9	108	182	1027	274	10
KAR2	712	1142	788	2642	433	3	3	322	105	253	181	9	61	94	1025	275	14
SBA1	757	2853	1838	5448	249	13	4	167	75	149	335	4	132	147	1009	276	7
NOP1	641	1400	958	2999	389	1	5	219	67	179	214	5	72	242	998	277	3
SUP45	517	1648	1114	3279	357	10	3	178	66	165	320	10	60	198	997	278	7
TOS1	465	1270	731	2466	457	0	9	192	54	158	296	23	139	128	990	279	12
THS1	694	1731	1160	3585	326	31	6	238	80	217	194	6	64	190	989	280	15
ATP2	616	3538	2321	6475	225	0	6	239	37	128	360	12	106	103	985	281	5
CYS4	792	2385	1707	4884	262	1	6	212	77	178	247	11	82	174	981	282	10
PET9	441	2278	1412	4131	290	2	7	181	54	108	343	33	136	117	972	283	4
HOM2	711	2543	1725	4979	258	28	2	191	73	172	301	14	104	116	971	284	11
UBC4	859	2459	1640	4958	259	1	13	221	108	191	182	13	61	189	965	285	3
PDR5	1145	740	526	2411	465	10	3	337	144	304	58	5	21	94	963	286	63
CCW14	735	1961	1225	3921	299	1	6	194	62	107	320	26	137	116	962	287	0
TKL1	642	1840	1209	3691	316	7	11	150	61	196	268	20	95	168	958	288	12
PAB1	368	868	583	1819	609	0	4	224	88	170	243	9	112	107	953	289	16
NHP2	597	1899	1226	3722	315	7	4	145	65	147	256	13	92	231	949	290	2
VRG4	269	720	515	1504	747	7	4	183	61	127	326	31	118	103	949	291	5
SCW10	659	1234	791	2684	426	2	5	196	82	127	225	21	94	168	913	292	4
TIF3	438	1359	830	2627	435	9	3	128	55	123	284	16	100	205	911	293	4
YDJ1	734	979	728	2441	462	12	1	239	86	202	150	11	29	187	904	294	3
YHB1	806	4356	2917	8079	198	19	10	209	97	164	202	12	54	160	898	295	9
SSC1	823	1957	1373	4153	287	2	3	260	83	196	195	9	67	85	895	296	20
ZUO1	680	1924	1184	3788	309	0	4	229	87	167	162	3	43	202	893	297	5
HXK1	427	5838	3890	10155	176	1	14	79	36	56	535	23	160	1	890	298	7
ADH3	606	1667	1061	3334	351	17	3	183	60	142	295	4	77	125	886	299	10
VOA1	585	1601	1044	3230	363	12	5	206	103	148	223	9	84	113	886	300	3
OYE2	743	2323	1586	4652	272	11	3	192	68	172	221	12	75	144	884	301	8
ERG2	536	1520	1074	3130	373	4	0	137	86	141	254	12	101	152	883	302	2
STE2	847	1841	1285	3973	296	1	3	207	94	179	196	12	69	119	876	303	6
VMA4	711	2578	1790	5079	256	2	6	236	97	162	152	8	56	163	874	304	4
YRA1	625	1963	1202	3790	308	7	1	206	92	156	185	7	61	165	872	305	3
GND1	689	1887	1192	3768	310	10	1	196	65	162	251	12	78	108	872	306	11
RTN1	910	2194	1525	4629	274	2	8	203	70	147	223	8	72	145	868	307	5
TAL1	730	2650	1483	4863	263	7	7	190	85	172	219	8	71	120	865	308	11
ADO1	633	1696	1055	3384	348	18	5	160	56	141	245	11	84	166	863	309	3
NSR1	689	1759	1130	3578	327	13	11	181	78	156	125	5	35	275	855	310	9
DED81	634	1675	1165	3474	340	2	5	182	71	156	204	8	73	160	854	311	11
HSP10	1019	2383	1648	5050	257	1	6	250	83	168	174	7	36	133	851	312	3
ILV3	461	1736	1159	3356	350	7	9	162	53	138	276	9	80	133	851	313	20
YOP1	969	3373	1911	6253	228	8	4	252	106	170	152	5	43	118	846	314	4
VMA11	438	1821	1234	3493	338	1	6	221	74	165	212	9	46	119	846	315	0
ARC1	707	1937	1254	3898	302	3	2	179	91	153	196	4	79	141	843	316	6
ARO4	525	2167	1470	4162	285	0	5	143	69	133	266	5	81	145	842	317	2
EGO4	253	6195	4269	10717	166	0	7	42	26	31	559	30	148	4	840	318	0
VMA16	244	1081	852	2177	515	11	6	266	103	133	159	7	49	122	839	319	4
NOP56	612	1686	1014	3312	355	3	5	172	64	115	206	6	79	194	836	320	6
SGT2	606	1485	1054	3145	371	12	3	182	78	168	214	8	75	110	835	321	4
ERG3	626	1336	945	2907	399	5	1	182	71	132	208	12	71	158	834	322	8
ELO3	476	1026	615	2117	527	6	3	204	54	137	207	11	53	167	833	323	7
YNL208W	542	2599	1707	4848	264	5	2	132	58	119	316	13	116	78	832	324	6
PFK1	436	1312	875	2623	436	6	5	185	64	156	207	18	94	104	828	325	19
RNR4	598	2389	1656	4643	273	4	5	218	68	155	202	5	48	125	821	326	6
FCY1	446	1691	967	3104	379	4	4	122	62	108	254	15	93	160	814	327	11
HAC1	312	815	563	1690	660	68	11	226	163	233	95	8	27	60	812	328	33
ERG11	607	1887	1167	3661	320	0	2	109	57	151	266	10	90	127	810	329	6
GUK1	687	1782	1184	3653	321	9	2	209	67	159	151	8	24	192	810	330	2
SUI3	571	2019	1431	4021	294	3	4	138	51	124	250	9	66	162	800	331	4
HOM6	649	2060	1283	3992	295	14	7	211	84	161	157	9	38	137	797	332	3
PDA1	623	1565	1132	3320	353	1	5	182	77	151	211	7	73	93	794	333	11
GRS1	599	1427	999	3025	385	5	2	178	62	132	208	9	63	135	787	334	7
PNC1	996	3795	2590	7381	210	2	6	197	119	139	239	7	73	12	786	335	0
SES1	767	2335	1623	4725	271	10	9	175	85	183	151	6	48	137	785	336	2
GAR1	432	1401	858	2691	424	14	3	108	53	109	200	10	100	204	784	337	4
VMA10	629	2968	2101	5698	242	2	0	189	109	117	169	10	68	120	782	338	6
SAM1	689	1947	1204	3840	305	11	4	145	65	126	178	16	71	180	781	339	7
TRR1	666	1825	1233	3724	314	7	3	170	59	148	183	6	62	150	778	340	4
CHA1	583	1453	932	2968	391	0	6	147	63	117	154	2	44	251	778	341	4
TIM10	636	2666	1817	5119	254	0	2	154	66	108	238	10	68	130	774	342	3
MPC2	761	3163	2062	5986	236	31	4	204	80	145	137	14	38	153	771	343	1
SSZ1	637	1552	1015	3204	364	22	4	167	65	171	154	11	37	165	770	344	8
PRC1	572	1601	1064	3237	362	4	4	156	70	155	228	11	89	55	764	345	4
HSP30	958	703	441	2102	530	1	2	225	114	206	134	9	57	11	756	346	0
DSE2	324	819	624	1767	634	0	2	127	53	73	198	33	132	140	756	347	3
ITS2-1	9	62	43	114	4557	732	108	62	4	13	237	25	406	9	756	348	4488
IMD4	718	1367	917	3002	388	11	4	201	63	152	124	7	25	182	754	349	26
ILS1	472	1100	756	2328	482	22	3	185	65	163	159	9	40	130	751	350	21
NPL3	398	1400	906	2704	422	1	7	105	30	95	279	10	92	129	740	351	4
UGP1	603	2421	1497	4521	276	4	4	205	66	143	214	10	51	48	737	352	5
PEP4	488	1824	1233	3545	332	4	6	135	51	144	287	19	71	30	737	353	5
HPT1	575	1843	1177	3595	325	10	2	138	62	104	147	15	56	213	735	354	3
FCY2	436	1162	713	2311	489	3	3	163	50	105	137	5	33	238	731	355	11
RHO1	575	2151	1435	4161	286	5	9	184	68	138	154	7	55	121	727	356	1
GUA1	623	1171	739	2533	448	12	3	152	78	127	152	4	36	177	726	357	10
PIL1	723	1782	1159	3664	319	0	5	167	60	150	199	2	60	86	724	358	7
HIS1	407	1979	1229	3615	323	12	6	162	63	120	160	10	54	153	722	359	7
HSP60	636	976	629	2241	506	6	2	216	78	169	130	2	50	77	722	360	12
ALD6	490	1403	890	2783	417	2	2	140	72	136	173	10	53	137	721	361	7
TIF5	408	1002	706	2116	528	10	3	131	44	110	189	2	49	191	716	362	3
EMI2	275	2468	1752	4495	277	0	5	82	28	53	413	23	97	7	703	363	0
GUS1	547	1558	1155	3260	360	14	4	198	73	178	117	3	30	104	703	364	7
SSH1	317	713	477	1507	745	15	2	176	64	149	152	8	57	96	702	365	3
GLK1	698	2592	1821	5111	255	1	2	190	33	39	299	8	123	9	701	366	10
SIS1	697	988	597	2282	496	6	0	231	89	179	114	2	39	47	701	367	2
ASN2	642	1418	892	2952	396	16	5	166	67	141	162	2	35	126	699	368	4
PIS1	379	1276	892	2547	447	7	4	174	93	115	182	9	51	72	696	369	3
ITS2-2	6	67	44	117	4535	749	114	43	2	14	240	12	369	11	691	370	4363
URA5	380	1278	803	2461	460	7	6	194	59	101	180	6	55	95	690	371	5
FKS1	373	664	464	1501	751	7	4	199	70	189	139	7	27	58	689	372	68
EMP24	626	1749	1048	3423	345	9	6	174	70	146	138	6	43	110	687	373	3
SBH2	633	2031	1406	4070	293	24	2	177	98	93	137	11	42	128	686	374	2
VMA7	499	1938	1329	3766	311	22	3	165	98	156	139	6	31	88	683	375	2
PFK2	338	723	514	1575	707	2	4	177	61	148	162	11	57	67	683	376	21
SBP1	534	2257	1385	4176	284	5	7	132	57	113	212	7	74	86	681	377	2
CPR5	491	1411	923	2825	412	9	4	173	77	119	158	5	46	97	675	378	1
PIR1	444	1214	748	2406	468	0	4	137	44	114	191	14	77	98	675	379	6
ERV25	642	1806	1120	3568	328	16	8	184	82	114	130	7	38	119	674	380	3
PDB1	570	1506	991	3067	381	0	1	222	75	130	105	8	25	104	669	381	2
BMH2	621	2235	1366	4222	282	1	3	120	48	105	193	10	95	97	668	382	1
LEU1	657	859	677	2193	514	8	0	181	82	128	133	16	59	68	667	383	11
VAS1	411	1069	731	2211	509	23	2	145	59	153	152	9	38	107	663	384	10
PYP1	516	1975	1185	3676	317	4	4	155	56	91	168	9	48	135	662	385	3
ERG6	459	1581	1004	3044	382	7	6	117	46	126	178	10	42	143	662	386	2
IMD3	474	1300	955	2729	420	2	3	134	50	114	183	13	43	124	661	387	7
ADE12	402	1764	1164	3330	352	2	4	129	40	66	231	15	102	77	660	388	4
MFA1	1163	707	475	2345	476	0	0	287	120	72	104	6	18	53	660	389	0
LSP1	761	2926	2084	5771	239	0	6	157	90	125	191	6	44	44	657	390	0
SMT3	554	2095	1423	4072	292	0	2	151	65	104	168	7	42	119	656	391	4
ARO2	471	1481	1010	2962	393	11	3	121	43	133	158	10	40	149	654	392	3
CAF20	400	1263	836	2499	453	4	4	139	63	109	152	13	62	116	654	393	0
CYS3	541	1415	944	2900	402	0	4	154	38	115	173	5	65	97	647	394	1
ASN1	410	1932	1404	3746	312	7	3	118	25	92	191	11	67	139	643	395	21
CDC48	470	1457	907	2834	411	8	4	165	58	112	178	3	58	66	640	396	5
ATP18	392	1838	1188	3418	346	0	6	89	49	69	224	12	60	135	638	397	0
RIB4	392	2416	1553	4361	280	1	9	137	48	102	147	5	39	159	637	398	1
UTR2	571	1640	1047	3258	361	7	4	112	30	84	186	7	81	132	632	399	5
QCR8	522	2117	1269	3908	301	11	0	115	65	81	201	13	85	71	631	400	0
YPT1	600	1881	1141	3622	322	12	3	122	88	102	138	3	51	125	629	401	4
SAR1	591	1922	1287	3800	307	2	5	189	50	103	119	4	44	119	628	402	4
VMA2	303	1051	681	2035	552	9	7	166	114	179	82	2	23	55	621	403	15
BAP2	501	445	367	1313	835	5	0	217	79	166	66	0	18	72	618	404	11
TYS1	459	1258	862	2579	444	1	1	125	51	108	138	6	40	147	615	405	2
GDH1	442	1910	1261	3613	324	25	1	131	42	113	134	6	33	150	609	406	7
YDL124W	763	2460	1503	4726	270	0	7	165	88	113	174	7	49	12	608	407	2
ARF2	540	2036	1280	3856	304	1	7	139	57	90	161	7	48	104	606	408	4
CBR1	613	1498	1003	3114	376	14	2	208	91	125	78	1	18	79	600	409	5
ERG10	442	1404	853	2699	423	21	3	125	41	111	165	8	38	110	598	410	10
SML1	678	1926	1337	3941	298	1	3	140	45	74	176	13	43	102	593	411	5
RPL18B	587	957	574	2118	526	5	3	139	62	124	81	1	21	164	592	412	4
APT1	350	1018	608	1976	567	19	5	149	65	112	102	7	45	112	592	413	3
ACO1	448	1011	667	2126	524	6	3	110	62	114	182	16	76	28	588	414	14
VMA1	384	1056	650	2090	535	26	3	163	47	123	141	5	37	72	588	415	30
YBR085C-A	595	1583	984	3162	367	0	3	150	63	95	177	8	60	34	587	416	2
RIM1	546	1611	1160	3317	354	0	3	122	62	98	166	4	41	92	585	417	1
CPR6	516	802	609	1927	583	2	5	173	74	122	95	2	22	97	585	418	5
SHR3	414	1416	906	2736	419	11	0	174	64	89	103	7	34	112	583	419	0
CAM1	451	1215	745	2411	466	3	4	172	52	116	122	5	29	86	582	420	4
DBP2	326	1086	711	2123	525	19	3	104	27	100	110	1	43	195	580	421	22
ATP1	377	1334	980	2691	425	2	5	112	36	96	194	10	55	74	577	422	4
HNT1	582	1702	1088	3372	349	2	3	156	86	85	115	7	41	86	576	423	4
ERG4	469	981	628	2078	538	11	1	163	45	110	122	8	42	86	576	424	1
VMA5	322	983	639	1944	578	5	2	153	64	108	113	8	60	69	575	425	7
GLY1	289	738	498	1525	734	2	3	156	45	107	122	5	30	108	573	426	12
GLC7	322	1184	741	2247	504	3	3	85	36	92	170	13	73	103	572	427	3
FRS1	473	1089	795	2357	474	10	4	142	59	96	137	10	45	82	571	428	3
RPS14B	418	915	594	1927	584	5	3	166	66	83	102	3	31	120	571	429	4
CDC60	360	717	522	1599	696	7	9	133	38	118	141	6	53	81	570	430	14
DPS1	439	1277	880	2596	442	1	4	138	55	135	112	6	30	93	569	431	8
ERG25	474	1435	936	2845	410	0	2	123	37	79	170	6	51	102	568	432	0
TIF35	479	1438	905	2822	414	24	4	120	58	102	113	3	38	134	568	433	1
SAM4	461	1259	745	2465	458	3	1	102	42	93	142	7	58	124	568	434	5
YPL225W	611	1953	1175	3739	313	5	3	139	58	121	106	1	41	100	566	435	2
YRO2	406	1294	825	2525	449	0	6	123	59	88	213	8	66	8	565	436	0
YLR257W	561	2233	1557	4351	281	1	4	132	74	117	144	5	51	40	563	437	4
NDE1	340	879	596	1815	613	6	1	151	44	89	123	8	51	96	562	438	3
ATP4	360	1795	1121	3276	358	4	4	101	44	65	169	5	49	126	559	439	4
PRS1	469	930	663	2062	544	4	2	139	65	123	84	1	23	124	559	440	6
TIF34	542	1362	910	2814	415	3	1	142	65	84	110	7	32	116	556	441	3
SPE3	349	1090	730	2169	517	14	3	163	57	103	104	7	30	89	553	442	1
GRX2	406	1668	1068	3142	372	0	1	80	38	68	235	13	82	36	552	443	0
VPH1	426	943	645	2014	556	13	1	214	59	105	71	4	26	73	552	444	11
ADE5_2C7	361	1229	831	2421	464	12	2	125	38	101	158	5	38	85	550	445	10
YLR179C	413	960	677	2050	546	4	3	162	83	113	87	3	26	75	549	446	6
INA1	380	1199	734	2313	488	1	3	115	36	82	174	2	47	92	548	447	9
ERP1	309	926	534	1769	632	13	2	147	59	96	106	7	32	101	548	448	2
RDL1	428	1820	1205	3453	344	7	2	128	71	103	140	5	43	57	547	449	3
YSY6	494	1488	961	2943	397	14	2	108	66	82	134	12	51	93	546	450	1
RPO26	527	1810	1121	3458	343	3	5	89	54	68	162	7	52	110	542	451	4
CBF5	370	1240	707	2317	484	21	1	110	50	108	119	6	45	104	542	452	6
MEO1	461	1914	1173	3548	331	12	1	152	67	37	157	3	63	62	541	453	5
THR4	583	1400	892	2875	407	2	1	143	54	90	137	7	33	76	540	454	9
HSP82	764	1025	658	2447	461	11	3	176	95	157	69	0	14	29	540	455	3
GPD1	433	1402	942	2777	418	0	2	95	57	90	216	7	64	10	539	456	2
YET3	426	1570	1034	3030	384	0	2	148	65	77	148	9	50	41	538	457	4
SEM1	477	1716	1082	3275	359	8	7	111	44	86	175	10	51	59	536	458	1
VMA8	404	1579	1014	2997	390	13	2	118	41	114	115	3	38	105	534	459	0
DYS1	335	930	633	1898	592	0	5	130	44	97	131	7	52	73	534	460	3
DDR48	415	2389	1666	4470	278	2	8	114	43	90	196	12	59	18	532	461	4
TOM6	516	1503	1146	3165	366	2	2	112	40	59	216	11	39	55	532	462	3
CCT3	238	672	498	1408	794	1	1	77	31	89	159	3	59	112	530	463	3
GDT1	338	813	486	1637	682	14	6	135	48	83	112	4	40	107	529	464	2
CMD1	547	2015	1311	3873	303	0	4	125	61	86	115	8	26	107	528	465	2
SNA3	473	1884	1205	3562	329	0	4	119	46	64	170	9	53	66	527	466	1
IRC22	444	998	697	2139	522	11	0	163	49	109	108	2	28	66	525	467	0
QCR7	298	1880	1239	3417	347	4	4	78	38	54	190	17	62	85	524	468	2
NHP6A	346	1539	1015	2900	403	1	1	123	50	65	148	12	43	83	524	469	1
LIA1	372	788	504	1664	673	0	0	82	26	75	134	4	57	146	524	470	4
ABF2	486	1441	945	2872	408	0	5	146	56	82	109	10	48	72	523	471	4
YNK1	437	1834	1230	3501	335	2	4	127	48	98	142	7	40	58	520	472	1
SBH1	458	1296	901	2655	430	2	2	129	46	64	129	6	36	107	517	473	5
ATP16	340	1708	1121	3169	365	3	5	84	33	58	191	11	71	68	516	474	2
PRE7	302	1033	699	2034	553	3	2	117	42	72	137	6	71	71	516	475	2
NOP58	272	890	530	1692	657	0	4	90	32	83	121	6	78	103	513	476	7
PRE9	467	1610	1015	3092	380	3	2	141	52	81	124	10	26	76	510	477	6
SUI2	382	1157	729	2268	500	1	10	97	52	87	120	6	41	105	508	478	0
FAS2	398	917	638	1953	572	8	4	153	57	135	75	3	25	60	508	479	41
ERV14	403	1237	862	2502	452	6	1	114	45	89	108	4	32	115	507	480	4
GSF2	215	869	558	1642	680	4	4	89	53	86	142	9	65	63	507	481	3
PAA1	519	1860	1165	3544	333	2	4	106	57	105	118	9	29	80	504	482	3
ATP15	435	1596	1270	3301	356	0	3	128	56	66	134	20	26	74	504	483	0
GCV3	296	1135	742	2173	516	6	1	94	37	66	157	8	55	87	504	484	3
PST2	407	1519	960	2886	405	3	3	117	40	74	140	5	50	75	501	485	4
TSC13	369	1032	652	2053	545	6	7	104	49	97	123	7	32	88	500	486	3
ELO2	359	683	463	1505	746	1	2	114	43	71	108	9	53	102	500	487	2
ATP17	344	1996	1203	3543	334	11	2	107	42	60	152	7	42	89	499	488	1
RET3	460	1498	935	2893	404	4	3	130	76	92	96	6	27	72	499	489	2
RPC10	353	950	576	1879	595	4	3	78	51	59	120	8	45	137	498	490	2
HMO1	399	1519	949	2867	409	1	3	114	53	56	111	5	37	120	496	491	3
FAA4	308	1241	824	2373	472	4	9	92	42	74	142	3	44	98	495	492	9
KTR1	235	647	438	1320	829	4	1	134	43	89	111	5	60	53	495	493	4
SIM1	229	550	353	1132	930	0	4	121	36	84	138	7	49	60	495	494	5
OST1	392	987	657	2036	550	8	3	147	54	113	82	4	23	71	494	495	6
YJR120W	422	2756	1740	4918	260	0	3	126	13	77	154	7	69	47	493	496	4
SNR54	552	1173	737	2462	459	4	2	144	39	114	69	4	12	111	493	497	13
ZRC1	416	837	467	1720	649	9	1	121	45	101	106	5	30	84	492	498	4
DUG1	364	1112	691	2167	519	4	1	140	35	81	121	4	37	70	488	499	6
RPB8	398	1040	676	2114	529	1	2	92	34	73	106	6	35	142	488	500	2
PHO12	193	1502	1017	2712	421	1	3	59	24	66	223	15	79	20	486	501	6
SND2	209	658	436	1303	840	2	3	87	40	58	135	5	51	110	486	502	2
SHM2	288	1901	1309	3498	337	2	4	75	31	70	184	5	55	64	484	503	5
PRE1	409	1355	833	2597	441	1	5	77	53	73	156	5	58	62	484	504	4
IDH2	576	1066	663	2305	491	0	1	170	72	121	65	7	24	25	484	505	2
ADH6	308	902	616	1826	608	9	1	122	69	87	86	5	29	85	483	506	7
SCS2	459	1233	796	2488	455	3	0	114	59	74	118	3	36	78	482	507	1
YMR295C	358	1155	692	2205	511	5	5	74	42	90	135	10	56	75	482	508	2
KRE2	315	936	736	1987	561	0	5	159	36	92	97	3	29	66	482	509	8
FRS2	390	787	503	1680	668	0	1	116	34	91	124	3	40	74	482	510	1
VMA9	398	1720	1003	3121	375	2	3	76	41	74	136	5	35	114	481	511	1
TPM1	513	2173	1415	4101	291	9	2	99	50	81	117	3	38	86	474	512	3
RNR2	302	1197	840	2339	479	1	1	95	52	74	148	6	42	54	471	513	7
VMA6	465	1518	984	2967	392	5	4	123	83	163	44	3	14	40	470	514	9
ATP19	315	1678	1160	3153	368	1	6	72	32	46	190	15	45	69	469	515	0
VTC3	244	1452	953	2649	432	14	4	60	28	66	137	6	67	105	469	516	8
SEC13	300	853	604	1757	636	2	0	93	39	106	110	3	34	84	469	517	2
STT3	308	559	349	1216	885	3	4	123	43	115	102	3	37	46	469	518	13
GET3	429	1354	868	2651	431	5	2	128	50	97	62	5	19	107	468	519	4
RPN8	395	1198	746	2339	478	13	2	109	46	95	99	6	25	86	466	520	6
HXT1	424	152	110	686	1457	6	1	141	38	68	25	4	8	182	466	521	3
PHO5	47	3001	1870	4918	261	0	4	12	7	13	339	13	68	13	465	522	0
GRX1	435	1668	1044	3147	370	1	3	93	48	70	164	13	38	37	463	523	0
ATP3	282	1397	841	2520	450	4	6	70	24	57	168	10	70	64	463	524	3
AAT2	297	748	518	1563	713	5	2	149	32	92	102	2	26	60	463	525	3
PHB1	204	695	454	1353	816	2	2	60	42	59	182	7	62	50	462	526	2
YDR341C	370	980	677	2027	554	13	3	111	34	86	102	5	33	89	460	527	3
ARO8	231	774	549	1554	723	7	0	96	36	71	128	5	56	66	458	528	6
ILV2	292	442	288	1022	1016	0	1	100	51	94	100	12	34	67	458	529	8
YGP1	534	1774	1170	3478	339	0	5	99	47	86	167	6	41	11	457	530	1
MET6	87	910	741	1738	642	4	1	60	24	49	204	15	86	16	454	531	5
ADE17	217	1624	1043	2884	406	2	4	71	21	59	199	6	49	47	452	532	2
SRP14	251	718	469	1438	780	1	1	46	25	74	131	9	53	114	452	533	2
WTM1	381	1195	796	2372	473	1	2	118	60	77	114	3	38	39	449	534	6
RPT2	317	958	603	1878	596	4	2	87	37	61	145	3	50	66	449	535	6
PUB1	287	945	563	1795	621	2	4	88	43	77	115	4	62	60	449	536	7
HEM13	132	1286	917	2335	480	0	4	42	19	33	224	10	103	17	448	537	1
RPB10	488	1475	994	2957	394	0	2	101	61	57	95	3	16	114	447	538	1
SPO24	391	764	565	1720	650	0	1	111	70	90	112	6	25	33	447	539	1
RPL22B	441	1118	723	2282	497	0	0	108	39	62	110	4	34	87	444	540	2
PRO3	300	852	596	1748	638	6	1	91	28	80	123	8	46	68	444	541	2
SUR2	321	1487	988	2796	416	1	1	110	41	56	125	4	30	77	443	542	3
COX4	171	1261	842	2274	499	3	5	59	19	44	193	8	74	46	443	543	0
NPC2	207	829	592	1628	688	0	2	94	33	45	145	9	57	58	441	544	1
COQ5	232	823	541	1596	699	2	0	83	35	71	142	5	56	49	441	545	1
RPL7B	490	1078	716	2284	495	2	2	125	45	82	70	7	15	96	440	546	5
MIX17	366	949	547	1862	603	3	7	86	36	79	93	3	34	109	440	547	2
MAP1	352	848	546	1746	639	0	2	110	38	81	87	3	26	94	439	548	2
ADE1	323	1671	1116	3110	378	4	2	89	40	77	116	4	32	80	438	549	3
PMT2	376	573	371	1320	828	6	1	121	46	82	98	4	24	61	436	550	2
FET3	290	397	308	995	1045	7	1	145	58	121	58	4	9	36	431	551	12
TUB2	475	1214	700	2389	470	4	0	117	32	56	113	8	35	69	430	552	8
CRH1	396	986	585	1967	570	4	1	98	32	64	134	8	41	53	430	553	5
BDF2	263	509	376	1148	916	2	2	62	23	55	151	11	46	82	430	554	8
YET1	488	1791	1186	3465	341	0	2	102	58	65	129	6	36	33	429	555	1
TPS1	524	1508	1115	3147	369	2	4	124	69	108	82	7	27	12	429	556	4
ITR1	304	1045	692	2041	548	9	1	100	32	86	113	3	33	62	429	557	2
ARB1	393	920	700	2013	557	4	7	108	42	109	77	2	14	76	428	558	12
ACP1	324	1197	733	2254	501	0	3	84	27	60	146	9	42	59	427	559	2
ETS1-1	32	120	101	253	3217	316	58	44	10	11	180	10	140	31	426	560	6521
PIC2	346	1582	1007	2935	398	1	1	81	44	60	175	7	47	5	419	561	1
URA7	127	214	151	492	1939	10	0	56	36	81	87	3	38	118	419	562	9
SCL1	436	1518	1001	2955	395	2	3	100	50	71	107	4	26	60	418	563	2
HMF1	335	1371	842	2548	446	1	2	88	40	71	109	11	39	60	418	564	2
GPD2	239	504	356	1099	955	0	2	64	27	71	151	5	62	38	418	565	1
LHP1	324	971	605	1900	591	1	0	94	34	58	72	1	29	129	417	566	3
YKT6	357	1382	871	2610	439	10	4	101	34	69	97	5	28	82	416	567	1
ELO1	284	1236	725	2245	505	1	3	116	42	47	139	10	37	25	416	568	3
TOM5	347	942	703	1992	560	0	3	101	40	62	109	4	15	85	416	569	2
TOM22	280	957	549	1786	626	1	2	114	42	73	99	3	27	58	416	570	0
GBP2	290	760	493	1543	728	2	1	87	26	65	103	1	40	94	416	571	2
SSP120	252	812	450	1514	740	4	2	85	40	79	117	3	33	59	416	572	1
RGI1	610	1776	1113	3499	336	1	3	89	48	52	173	7	43	3	415	573	1
SPT15	264	705	494	1463	768	1	5	66	31	60	121	8	46	83	415	574	3
PUP3	340	1180	809	2329	481	6	1	96	36	69	110	10	31	62	414	575	3
CMK2	492	810	508	1810	616	1	1	89	49	123	100	7	34	12	414	576	4
FAS1	353	746	527	1626	689	12	7	97	50	93	85	4	23	62	414	577	54
RDI1	185	578	376	1139	924	1	0	75	28	69	122	7	49	64	414	578	0
PMT4	104	272	205	581	1690	10	2	127	31	103	92	6	19	35	413	579	7
MDH1	260	1615	1029	2904	400	3	4	76	35	80	136	7	44	34	412	580	1
FUR1	346	710	468	1524	735	5	4	100	48	78	70	1	20	95	412	581	0
ERG1	185	466	321	972	1071	3	1	69	27	75	118	17	44	62	412	582	4
VMA13	540	1533	1039	3112	377	7	4	125	62	104	49	4	21	44	409	583	4
ERG9	335	1151	803	2289	493	3	5	85	37	63	117	8	52	47	409	584	2
GAS5	350	812	536	1698	653	0	3	96	32	53	126	6	50	46	409	585	3
AMN1	302	758	500	1560	716	1	1	80	36	81	97	10	23	81	408	586	4
RRB1	290	560	377	1227	880	10	0	89	24	97	54	1	20	123	408	587	3
GVP36	286	1038	650	1974	568	7	3	72	36	60	120	2	47	70	407	588	5
FPR4	235	853	619	1707	651	0	1	68	27	62	103	5	31	111	407	589	0
UBI4	291	1222	802	2315	486	0	1	93	17	32	161	15	68	20	406	590	3
MES1	277	737	488	1502	750	6	1	99	36	84	87	2	18	80	406	591	7
PHO3	458	555	353	1366	808	1	1	121	51	93	63	7	15	56	406	592	5
HRI1	361	991	586	1938	580	17	3	108	47	102	57	4	13	74	405	593	1
ETS1-2	28	132	104	264	3130	342	58	46	5	19	173	3	132	27	405	594	6477
VTC4	195	1003	686	1884	593	6	8	76	37	67	114	7	40	62	403	595	8
MRT4	304	838	519	1661	675	7	5	88	37	52	50	2	19	155	403	596	2
TNA1	262	514	324	1100	954	5	1	100	38	88	92	4	31	50	403	597	3
RPN2	285	702	521	1508	743	6	6	81	38	68	115	6	35	57	400	598	7
SNC2	337	969	642	1948	575	0	1	59	34	66	126	8	47	59	399	599	0
STI1	544	665	473	1682	664	0	4	142	61	94	36	1	15	47	396	600	3
ECM15	384	1372	906	2662	429	8	4	100	40	63	97	9	29	57	395	601	2
CCT5	272	715	381	1368	807	14	3	76	41	88	90	2	29	69	395	602	2
HRP1	241	729	438	1408	793	2	1	78	32	68	103	8	36	69	394	603	1
TMH11	298	1124	773	2195	513	3	3	104	49	68	95	4	22	49	391	604	3
TPS2	393	792	536	1721	648	0	5	122	42	103	87	2	32	3	391	605	9
ERV46	360	769	463	1592	700	9	2	103	45	99	62	2	18	62	391	606	3
CDC42	316	876	576	1768	633	1	3	83	32	82	80	5	28	79	389	607	5
TIF6	193	598	375	1166	904	1	1	84	39	56	86	6	29	89	389	608	1
TPO2	331	381	274	986	1059	2	0	115	29	77	83	7	39	39	389	609	0
CIT1	370	1145	796	2311	490	1	3	100	38	102	107	3	26	12	388	610	4
GCD11	345	983	707	2035	551	5	3	93	41	61	76	1	35	81	388	611	7
RPT1	355	926	695	1976	566	6	0	78	36	86	77	0	41	70	388	612	1
HTS1	333	943	583	1859	604	2	2	89	22	62	94	1	47	73	388	613	8
SEC61	235	469	303	1007	1028	0	4	95	35	85	110	0	14	48	387	614	6
PRE3	374	1147	764	2285	494	11	4	107	47	74	77	4	23	53	385	615	0
SOD2	299	1015	629	1943	579	0	5	69	30	52	150	4	37	43	385	616	3
NOP7	287	827	570	1684	663	11	3	74	38	68	68	4	27	106	385	617	0
MIR1	146	772	565	1483	762	0	5	86	31	68	89	9	46	56	385	618	3
RPG1	248	636	479	1363	810	1	3	59	30	68	109	6	29	84	385	619	8
GLN4	270	523	350	1143	919	13	1	100	51	71	76	5	15	67	385	620	7
NHP6B	301	1238	853	2392	469	4	2	70	32	44	127	7	20	84	384	621	0
TMC1	324	671	434	1429	784	1	1	132	71	92	51	1	9	28	384	622	2
YPT7	307	1034	669	2010	558	7	3	76	34	56	122	5	32	58	383	623	0
WRS1	309	857	562	1728	645	4	2	70	46	79	75	5	28	80	383	624	2
VPS68	308	933	624	1865	601	2	3	83	36	63	124	7	37	31	381	625	1
ALA1	252	552	379	1183	896	7	5	101	34	71	81	1	27	66	381	626	10
COX6	204	1294	817	2315	487	5	2	61	22	39	135	5	68	48	378	627	1
ERG20	472	1619	1033	3124	374	9	3	86	55	92	64	4	20	56	377	628	2
PRT1	371	764	542	1677	669	17	2	97	34	82	48	2	11	103	377	629	12
VMA21	250	823	551	1624	691	2	1	67	34	67	95	4	47	62	376	630	3
ATP7	280	1422	965	2667	427	1	8	91	37	53	99	6	16	73	375	631	1
ARP2	339	1112	717	2168	518	0	0	79	37	67	110	2	27	53	375	632	3
CPR3	270	796	550	1616	692	0	5	107	39	52	93	3	28	53	375	633	2
HCR1	351	821	561	1733	644	4	0	88	36	70	67	5	22	86	374	634	2
PRE2	440	1355	816	2611	438	14	3	79	38	69	99	3	29	56	373	635	5
LSM5	268	766	531	1565	712	18	1	56	33	61	83	8	54	78	373	636	1
CCT8	316	757	514	1587	702	8	2	91	45	91	56	7	22	60	372	637	4
RBG1	149	261	157	567	1726	4	0	46	14	59	93	4	24	132	372	638	3
YSA1	335	1613	1058	3006	386	1	4	73	40	56	134	7	24	37	371	639	1
SHB17	324	735	467	1526	732	4	3	81	34	75	75	5	15	86	371	640	4
APA1	413	1112	777	2302	492	0	0	82	41	72	83	1	30	61	370	641	2
RPN5	367	1156	727	2250	503	3	2	97	32	78	71	9	23	60	370	642	1
PGA3	404	949	616	1969	569	3	2	94	52	65	69	6	18	66	370	643	3
QCR9	226	1396	995	2617	437	2	3	81	30	43	116	13	41	45	369	644	1
PRE5	398	1218	795	2411	467	0	7	73	44	78	79	1	26	67	368	645	1
RPB5	346	890	552	1788	625	5	3	77	47	77	64	3	23	77	368	646	1
IFA38	335	795	592	1722	647	6	1	118	32	71	85	1	21	40	368	647	1
PMT1	324	454	316	1094	959	4	4	87	28	113	56	9	22	53	368	648	7
NUG1	188	445	308	941	1110	3	1	70	19	49	60	4	28	138	368	649	2
TSC3	335	965	632	1932	582	7	0	97	29	50	94	3	29	65	367	650	1
WBP1	311	844	536	1691	659	0	6	95	47	76	74	3	23	49	367	651	2
PUP2	396	1346	843	2585	443	9	2	98	44	82	56	4	13	69	366	652	1
PRY2	332	798	481	1611	695	1	2	98	24	34	91	1	47	70	365	653	2
BOL2	217	648	387	1252	870	2	2	68	34	54	89	7	45	68	365	654	1
PMI40	302	681	436	1419	788	3	2	76	31	50	86	5	41	75	364	655	3
TAT1	285	379	235	899	1156	4	2	83	24	93	61	1	16	86	364	656	8
SPI1	479	1516	1039	3034	383	0	3	96	54	60	103	7	38	5	363	657	0
TIM17	257	779	483	1519	738	0	2	73	29	62	83	3	33	80	363	658	0
YHR020W	299	712	472	1483	761	1	6	97	45	90	44	3	21	63	363	659	8
CHO1	274	653	430	1357	813	3	1	94	38	69	91	1	26	44	363	660	0
OST5	311	989	616	1916	588	1	0	88	33	70	81	3	17	70	362	661	3
LEU4	177	672	465	1314	834	0	2	77	28	61	125	9	34	28	362	662	6
FUN12	248	518	343	1109	944	5	7	82	27	88	64	7	26	68	362	663	8
TUF1	281	1069	734	2084	536	8	1	84	41	60	97	10	20	49	361	664	4
LAT1	375	951	653	1979	564	8	3	98	33	78	74	2	30	46	361	665	7
BRX1	279	657	420	1356	814	3	1	86	20	56	79	1	20	99	361	666	5
ADE6	173	553	380	1106	946	6	2	75	28	63	106	5	31	53	361	667	19
PRE10	353	1292	870	2515	451	7	4	88	42	76	77	6	22	49	360	668	2
NIP7	255	806	567	1628	687	14	2	75	31	47	80	1	22	104	360	669	0
RPN6	350	955	644	1949	574	3	3	95	34	86	78	2	19	45	359	670	3
PHO86	240	930	622	1792	623	2	0	68	19	53	109	0	32	78	359	671	4
FPR3	278	919	622	1819	610	1	2	71	37	78	74	1	28	68	357	672	4
PRE8	309	848	539	1696	655	0	2	80	43	65	84	7	22	55	356	673	1
NPT1	312	750	494	1556	721	2	2	86	40	70	73	2	22	63	356	674	4
PRE6	387	1356	861	2604	440	2	6	72	30	61	83	3	31	75	355	675	1
CCT4	331	870	610	1811	615	8	1	101	32	62	59	4	17	80	355	676	1
MGE1	320	1379	935	2634	434	0	3	81	39	56	91	4	30	53	354	677	3
MUP1	195	1082	768	2045	547	2	2	52	34	48	133	7	40	39	353	678	3
CWP1	443	953	668	2064	543	1	4	97	40	65	78	5	32	35	352	679	0
ATP5	238	1222	792	2252	502	7	2	69	38	40	98	5	27	74	351	680	0
RPN3	314	907	592	1813	614	5	1	81	42	67	77	5	25	54	351	681	4
LSM2	268	868	568	1704	652	2	2	96	43	53	91	10	23	35	351	682	1
ERP2	278	810	574	1662	674	0	0	93	45	72	68	1	17	54	350	683	4
ERG13	231	627	434	1292	850	0	2	120	31	47	76	5	23	48	350	684	6
YHM2	196	466	282	944	1103	13	1	67	27	54	91	4	43	64	350	685	4
MCR1	286	1258	732	2276	498	2	2	86	30	56	123	6	29	19	349	686	0
MLC1	389	1024	683	2096	533	1	2	96	26	67	52	3	27	78	349	687	2
SDD2	257	1105	618	1980	563	10	1	76	29	49	100	7	31	57	349	688	1
IZH2	117	1005	650	1772	630	7	7	37	18	22	163	6	65	38	349	689	3
RPC40	314	811	505	1630	685	8	3	77	31	76	50	3	20	91	348	690	3
TOM40	198	557	376	1131	931	0	5	72	25	47	116	4	56	28	348	691	3
RAS2	346	887	602	1835	607	0	1	83	44	79	90	2	26	23	347	692	4
CCT6	285	689	457	1431	782	5	1	88	31	80	60	2	19	67	347	693	3
RER1	245	663	404	1312	836	2	0	91	43	50	87	6	23	47	347	694	1
RNA1	307	868	628	1803	618	3	0	79	36	72	67	2	21	69	346	695	1
HSP42	560	910	611	2081	537	0	1	111	65	93	47	2	25	2	345	696	1
CHO2	219	480	386	1085	969	6	0	113	30	73	57	3	19	50	345	697	9
CDC37	160	454	311	925	1128	3	1	48	21	73	115	2	32	54	345	698	2
SRP40	213	305	182	700	1437	1	0	62	26	51	65	4	27	110	345	699	1
HCH1	414	686	459	1559	718	5	0	93	49	90	36	1	23	51	343	700	4
PST1	339	821	532	1692	656	0	1	65	33	60	110	7	36	31	342	701	2
CCT7	266	852	548	1666	671	2	4	60	28	79	82	3	20	70	342	702	1
NOG2	137	296	199	632	1564	209	21	51	16	35	69	11	46	114	342	703	71
ARC15	344	1521	1037	2902	401	2	9	67	32	61	101	1	39	40	341	704	1
YCP4	288	993	588	1869	598	4	0	92	31	57	82	3	24	51	340	705	1
PRE4	346	1037	683	2066	542	2	3	65	30	55	86	2	30	71	339	706	1
RPN1	286	639	425	1350	819	8	1	65	27	76	94	8	37	32	339	707	7
YARCTyB1-1	331	430	344	1105	947	6	0	115	27	88	67	0	23	19	339	708	140
ARC19	292	1247	658	2197	512	0	4	66	23	34	128	3	45	39	338	709	3
SVF1	252	737	501	1490	759	4	2	73	15	62	76	0	26	86	338	710	2
YPQ1	199	422	279	900	1155	3	2	71	33	53	70	4	34	73	338	711	2
EMP70	154	318	250	722	1386	9	0	86	33	72	73	3	33	38	338	712	5
ILV6	333	944	590	1867	599	0	2	88	40	60	66	2	22	59	337	713	5
COR1	185	1182	731	2098	531	2	5	64	22	53	108	3	30	56	336	714	1
LPD1	282	1038	658	1978	565	3	1	61	21	72	100	6	22	54	336	715	4
ACC1	271	532	368	1171	901	6	3	86	44	77	59	4	15	51	336	716	43
SEC28	303	1114	749	2166	520	0	1	91	34	61	79	2	16	50	333	717	2
PSG1	205	348	204	757	1328	6	1	99	39	86	50	7	12	40	333	718	1
PRY1	187	818	525	1530	731	0	0	64	28	40	122	11	39	28	332	719	0
RVS161	271	888	585	1744	640	1	2	85	32	60	85	3	31	35	331	720	1
SVS1	384	772	494	1650	678	0	4	95	31	58	65	5	21	56	331	721	1
ASP1	226	446	347	1019	1020	21	2	109	32	48	40	2	18	82	331	722	7
SNR59	432	997	647	2076	539	0	2	96	35	66	47	5	12	69	330	723	4
TVP18	284	766	472	1522	737	0	3	75	32	60	96	1	27	39	330	724	1
COX8	279	1424	963	2666	428	0	4	70	29	49	91	6	20	63	328	725	0
BAT2	327	661	484	1472	765	3	3	109	35	91	55	2	18	18	328	726	7
TIM8	280	709	466	1455	772	0	3	58	25	46	122	4	26	47	328	727	1
TCP1	245	557	288	1090	962	2	3	83	31	58	63	7	19	67	328	728	4
RVB1	251	631	411	1293	848	1	4	79	26	61	61	2	28	70	327	729	4
COX9	183	858	641	1682	667	5	1	74	34	42	102	2	16	56	326	730	0
NCW2	371	751	474	1596	698	2	2	81	51	65	88	4	20	17	326	731	0
TUB1	273	588	422	1283	854	3	3	85	28	67	75	1	16	54	326	732	1
SER1	365	1162	702	2229	507	10	1	79	33	89	57	3	17	47	325	733	4
CCT2	303	744	532	1579	706	10	2	79	35	71	57	1	14	68	325	734	2
CSG2	206	552	306	1064	987	0	2	83	33	59	69	10	48	23	325	735	2
PHO13	235	680	430	1345	821	3	1	75	32	48	83	8	24	54	324	736	2
SDH4	121	618	442	1181	898	0	3	40	18	23	112	23	94	14	324	737	1
SEC23	194	456	336	986	1060	0	2	82	19	54	94	4	31	39	323	738	4
SEC4	295	1042	601	1938	581	8	1	64	28	73	101	4	24	28	322	739	4
COX5A	102	735	447	1284	853	2	2	41	18	35	107	14	67	40	322	740	0
RPE1	187	431	302	920	1133	2	3	83	26	65	67	3	20	58	322	741	4
CLC1	324	1234	787	2345	477	2	3	69	34	78	66	3	25	46	321	742	5
SOP4	315	875	595	1785	628	2	1	81	35	56	78	2	23	46	321	743	1
EMC3	300	871	511	1682	666	6	3	99	27	78	57	0	13	47	321	744	2
LCB2	295	692	459	1446	776	2	1	77	34	72	67	1	24	46	321	745	1
ASP3-1	298	797	561	1656	676	1	0	102	47	55	60	1	17	38	320	746	7
SEC14	100	425	281	806	1258	2	2	82	28	42	75	4	39	50	320	747	1
COX13	269	1348	880	2497	454	8	2	67	28	44	88	7	24	61	319	748	3
YIP3	299	634	441	1374	805	0	2	75	36	58	70	7	27	46	319	749	1
HTZ1	260	784	513	1557	720	1	1	66	31	43	86	2	31	59	318	750	0
THR1	336	730	459	1525	733	0	3	84	29	57	67	2	19	59	317	751	2
NSG1	197	422	283	902	1152	10	0	94	36	56	72	4	12	43	317	752	1
QCR6	177	1163	735	2075	540	1	3	31	13	29	138	3	53	49	316	753	2
SRP21	261	863	448	1572	710	1	4	66	24	37	92	5	28	64	316	754	1
PGA2	335	1180	701	2216	508	17	4	74	42	50	71	1	21	56	315	755	1
ATP14	272	1121	736	2129	523	0	0	50	29	34	107	12	33	50	315	756	1
RPT6	344	1036	601	1981	562	2	3	77	44	73	51	2	17	51	315	757	3
GLO1	255	861	576	1692	658	5	3	99	41	71	58	2	18	26	315	758	0
ASP3-4	290	854	488	1632	683	0	2	83	41	47	69	3	22	50	315	759	10
RLP7	274	599	350	1223	882	11	3	68	24	40	57	5	13	108	315	760	0
EMC6	152	495	316	963	1079	4	3	94	37	42	69	9	27	37	315	761	0
ILV1	271	779	482	1532	729	1	2	72	28	60	63	4	18	68	313	762	8
RFS1	383	1444	996	2823	413	3	2	74	48	79	70	3	23	15	312	763	3
TIM11	267	1324	789	2380	471	5	3	71	31	52	83	4	28	43	312	764	0
TPO3	335	438	302	1075	976	1	2	89	36	66	69	5	20	27	312	765	4
CRS1	223	488	310	1021	1018	1	1	68	22	65	83	3	21	50	312	766	3
SEC24	147	325	268	740	1355	1	0	62	19	64	93	3	38	33	312	767	6
ASP3-2	301	838	492	1631	684	0	1	89	29	62	64	5	20	42	311	768	4
URM1	236	539	363	1138	925	3	2	69	34	49	65	2	30	62	311	769	1
LSM7	313	964	606	1883	594	1	2	71	39	55	68	4	14	59	310	770	0
HIS4	185	974	643	1802	620	5	2	59	12	62	107	5	30	35	310	771	11
VTC2	196	830	525	1551	725	9	2	62	19	49	104	2	19	55	310	772	5
YMR099C	248	746	498	1492	756	6	2	79	35	45	76	5	19	51	310	773	2
IDI1	279	729	483	1491	757	6	2	52	24	70	61	2	28	73	310	774	3
KTR4	272	708	485	1465	766	2	2	69	25	50	98	4	40	24	310	775	1
GIM4	340	662	444	1446	775	14	3	67	29	51	59	2	22	80	310	776	1
COP1	185	437	298	920	1134	7	1	64	29	74	84	0	17	42	310	777	20
URA4	232	792	525	1549	726	0	2	82	27	46	59	3	7	85	309	778	0
ADE3	255	636	462	1353	815	2	3	81	31	78	62	2	17	38	309	779	18
SFM1	251	781	530	1562	714	7	5	85	22	56	65	3	8	69	308	780	3
YMR226C	309	914	594	1817	611	0	2	103	33	56	47	4	15	49	307	781	4
BAP3	251	703	465	1419	789	1	7	76	36	57	81	4	15	38	307	782	6
AAH1	180	291	218	689	1453	8	0	76	18	55	34	3	11	110	307	783	4
MIC10	280	995	645	1920	587	0	0	53	14	39	97	6	31	66	306	784	0
ARC35	219	763	517	1499	752	2	0	73	21	41	107	4	12	48	306	785	2
ARA1	336	1256	724	2316	485	0	1	72	39	49	87	7	27	24	305	786	2
RPS9A	288	1167	692	2147	521	4	3	70	40	37	75	1	23	59	305	787	5
MDM35	189	841	582	1612	693	1	0	42	24	43	116	9	41	30	305	788	1
RPT4	228	815	481	1524	736	3	2	72	23	53	70	4	24	59	305	789	3
GPX2	332	414	274	1020	1019	5	1	89	35	53	38	1	12	77	305	790	1
RPA34	214	510	308	1032	1009	4	2	61	25	44	57	3	20	94	304	791	1
SRP54	181	499	322	1002	1032	5	0	64	27	95	69	2	15	32	304	792	2
GLO3	168	424	265	857	1191	3	2	73	26	55	61	3	32	54	304	793	1
TOM7	290	898	671	1859	605	1	2	67	22	33	109	7	18	47	303	794	1
ASP3-3	326	832	524	1682	665	1	1	82	34	51	69	5	24	38	303	795	2
EMC4	250	776	560	1586	704	0	1	54	24	62	92	2	26	43	303	796	1
ACS2	297	696	450	1443	778	3	3	83	25	57	56	3	23	56	303	797	10
NYV1	173	523	345	1041	1003	3	2	52	25	45	104	4	29	44	303	798	1
ERD2	204	438	260	902	1151	9	2	93	34	63	50	6	20	37	303	799	0
AIM29	248	790	471	1509	742	9	1	71	33	55	65	2	20	56	302	800	0
RPC19	188	492	335	1015	1022	1	1	53	35	39	59	3	26	87	302	801	1
PUP1	314	954	597	1865	600	3	3	78	27	51	74	3	12	55	300	802	3
ZWF1	229	593	435	1257	868	0	0	74	28	51	92	3	32	20	300	803	5
LYS12	301	648	420	1369	806	3	0	79	42	56	54	0	11	57	299	804	5
GLR1	194	645	455	1294	847	8	1	87	30	49	62	1	27	43	299	805	2
IST2	215	491	319	1025	1012	0	1	73	20	57	83	3	24	39	299	806	4
NEW1	169	402	293	864	1184	3	1	83	31	59	50	3	15	57	298	807	14
SAM2	171	932	672	1775	629	0	3	49	22	52	93	3	34	44	297	808	1
AHC2	271	908	637	1816	612	1	0	60	38	52	68	5	18	55	296	809	1
PRS3	302	629	420	1351	818	9	0	89	34	73	27	3	7	63	296	810	7
SEC63	253	608	406	1267	863	8	0	67	27	81	56	1	21	43	296	811	0
EGT2	307	389	272	968	1074	1	4	67	23	39	75	3	32	57	296	812	9
RPN12	239	909	587	1735	643	0	0	81	29	56	58	1	18	52	295	813	0
MCA1	211	618	421	1250	871	2	2	56	37	58	73	4	33	33	294	814	1
LAC1	147	497	319	963	1080	1	1	91	28	63	56	4	17	35	294	815	2
FOL2	248	1011	691	1950	573	11	3	67	20	35	78	6	29	58	293	816	3
RPN9	316	891	542	1749	637	4	1	64	36	55	62	3	19	54	293	817	2
DSE1	300	593	440	1333	824	4	2	93	39	73	26	1	11	50	293	818	11
KSH1	187	614	360	1161	908	3	1	60	29	49	73	2	32	48	293	819	0
TIF4631	225	430	346	1001	1033	4	2	84	36	78	35	4	14	42	293	820	14
SDH3	314	1287	828	2429	463	0	1	57	22	33	91	9	38	42	292	821	1
HYR1	250	1035	631	1916	589	1	4	50	37	56	66	4	35	43	291	822	0
ARP3	301	912	630	1843	606	0	2	74	25	63	69	5	19	36	291	823	5
VPS74	224	770	497	1491	758	4	3	62	28	47	73	8	29	44	291	824	1
SUP35	323	667	471	1461	770	9	3	74	28	66	46	2	14	61	291	825	6
CBC2	177	736	478	1391	799	1	4	60	20	40	74	3	15	78	290	826	2
NOP15	229	626	423	1278	857	1	0	49	29	48	53	2	22	87	290	827	1
FAA1	205	589	354	1148	918	7	2	73	33	76	62	6	18	22	290	828	1
COX12	259	1252	842	2353	475	5	1	54	25	39	89	5	34	43	289	829	1
TMA20	264	766	474	1504	748	0	1	70	31	34	68	3	18	65	289	830	0
ARL1	213	746	450	1409	792	9	4	61	21	44	72	4	31	56	289	831	0
YBL028C	199	435	318	952	1093	4	1	56	31	43	44	5	13	97	289	832	0
SUN4	109	370	230	709	1416	3	4	65	16	30	84	4	38	52	289	833	9
PGM2	234	2369	1537	4140	289	0	5	47	23	48	129	4	35	2	288	834	0
SCS7	286	980	679	1945	577	1	3	77	29	60	73	1	15	33	288	835	3
FES1	323	490	343	1156	910	3	2	77	37	79	49	1	7	38	288	836	0
GOT1	131	349	245	725	1381	2	1	64	37	47	62	3	35	40	288	837	1
ERV29	227	543	297	1067	983	1	1	93	37	64	54	1	13	25	287	838	2
DBP5	189	489	363	1041	1002	8	4	54	35	47	67	2	20	61	286	839	3
GDA1	248	446	311	1005	1029	3	1	90	26	53	50	1	17	49	286	840	4
SPL2	98	1282	945	2325	483	1	1	23	9	20	124	12	53	43	284	841	0
CIC1	186	520	354	1060	989	0	4	56	20	35	62	4	21	86	284	842	1
HAP4	244	473	296	1013	1023	0	2	73	27	63	63	3	24	31	284	843	9
LCB1	197	439	304	940	1111	0	0	61	27	51	85	3	24	33	284	844	3
GPH1	61	1452	957	2470	456	2	4	34	8	25	172	8	36	0	283	845	1
NCP1	255	600	401	1256	869	0	1	72	26	62	52	6	18	47	283	846	7
LSM6	393	1176	640	2209	510	9	3	91	26	24	84	5	24	28	282	847	1
ADE16	255	639	374	1268	862	11	3	71	22	65	65	4	14	41	282	848	4
DUT1	193	513	384	1090	963	5	1	52	32	61	47	3	13	74	282	849	0
IDH1	341	537	361	1239	876	0	1	102	37	73	33	2	14	20	281	850	5
OST2	260	742	485	1487	760	11	3	68	30	48	52	4	22	56	280	851	1
NIP1	137	405	266	808	1256	5	4	51	25	54	75	4	19	52	280	852	6
CLG1	74	209	131	414	2222	0	1	51	20	50	90	2	27	40	280	853	2
FSH1	230	788	543	1561	715	16	2	50	34	33	59	1	14	88	279	854	2
LOG1	222	773	470	1465	767	2	1	56	15	43	94	2	26	43	279	855	0
TSL1	272	401	337	1010	1027	0	2	80	41	57	69	1	28	3	279	856	2
UBA1	241	411	320	972	1070	5	2	91	31	65	41	2	21	28	279	857	6
MRP8	290	990	679	1959	571	0	1	84	54	65	35	2	16	22	278	858	1
SPC3	218	776	514	1508	744	0	0	70	22	42	73	5	33	33	278	859	0
RBD2	201	647	414	1262	865	3	2	67	25	38	77	3	31	37	278	860	2
SCP160	222	483	343	1048	998	0	2	73	25	45	58	2	32	43	278	861	15
DLD3	225	805	540	1570	711	3	2	65	33	59	81	6	17	16	277	862	7
PTC3	230	800	473	1503	749	6	2	68	27	56	67	4	18	37	277	863	2
DPM1	231	689	440	1360	812	1	2	73	36	43	64	1	18	41	276	864	2
RPN13	291	1070	712	2073	541	2	2	74	35	49	62	1	14	40	275	865	2
RPN7	255	740	463	1458	771	3	4	50	28	59	71	6	24	37	275	866	3
HOG1	262	605	434	1301	842	3	0	76	34	57	51	4	16	37	275	867	4
VPS21	146	578	338	1062	988	2	2	51	16	36	83	5	37	47	275	868	0
COS6	171	468	274	913	1143	2	1	77	33	53	68	1	15	28	275	869	3
HMRA1	269	913	626	1808	617	4	5	44	32	29	94	9	25	40	273	870	1
FYV5	261	862	526	1649	679	0	0	52	14	34	87	6	26	54	273	871	0
DPH5	221	625	350	1196	892	1	0	79	29	57	43	2	7	56	273	872	1
FTR1	237	363	243	843	1203	9	1	68	22	49	46	6	22	60	273	873	2
MCK1	65	235	168	468	2017	0	1	63	29	49	54	5	40	32	272	874	2
TOM70	221	640	456	1317	832	1	1	82	20	53	58	5	14	39	271	875	1
SUR7	225	538	339	1102	952	0	1	67	35	43	71	2	17	36	271	876	1
KRE1	296	502	299	1097	956	1	1	63	26	60	80	1	16	25	271	877	1
SSO2	194	504	331	1029	1010	1	3	46	32	45	78	3	32	35	271	878	1
LAG1	198	515	280	993	1050	4	2	80	28	62	58	4	16	23	271	879	1
YOS1	232	795	525	1552	724	5	2	83	34	43	51	1	17	41	270	880	0
WWM1	248	754	423	1425	785	6	1	57	25	61	44	4	13	66	270	881	2
LSB1	319	584	385	1288	851	3	0	85	43	63	32	0	14	33	270	882	2
PUN1	316	404	235	955	1087	2	0	85	27	56	57	2	16	27	270	883	3
MRI1	199	452	276	927	1124	7	1	76	28	39	52	0	14	61	270	884	1
PPN2	188	873	577	1638	681	4	1	56	27	40	83	4	27	32	269	885	0
SRV2	231	692	492	1415	790	1	1	71	25	44	83	1	14	31	269	886	6
YDC1	220	727	418	1365	809	1	3	81	45	47	66	2	23	5	269	887	0
TRP5	249	648	431	1328	825	7	3	84	28	48	52	4	20	33	269	888	8
POL30	223	508	355	1086	968	0	1	49	18	43	67	4	18	70	269	889	0
RAD23	168	419	261	848	1198	1	1	59	20	44	57	6	25	58	269	890	3
ARO3	154	978	815	1947	576	1	1	47	19	36	90	5	44	27	268	891	2
YPT31	303	984	619	1906	590	0	1	71	33	43	48	1	14	58	268	892	1
PCL5	128	630	385	1143	921	1	2	25	22	35	105	7	48	26	268	893	2
MNN9	241	495	369	1105	948	5	1	81	26	71	32	0	10	48	268	894	3
NMD3	201	435	290	926	1126	7	0	65	23	43	45	2	13	77	268	895	8
GAS3	187	359	210	756	1334	1	1	77	20	51	50	4	27	39	268	896	2
VAN1	109	240	167	516	1868	2	1	49	16	44	82	2	20	55	268	897	2
SAC6	312	759	555	1626	690	6	1	89	34	66	40	2	10	26	267	898	2
RUB1	220	714	497	1431	783	6	3	56	42	51	60	2	14	42	267	899	0
KRE9	303	676	434	1413	791	3	0	59	32	43	63	2	25	43	267	900	2
KTR3	226	593	374	1193	894	1	3	80	24	67	32	3	14	47	267	901	3
PHO8	161	738	497	1396	797	2	0	63	25	46	74	4	33	21	266	902	3
SEC66	197	702	394	1293	849	0	2	64	26	49	64	2	23	38	266	903	1
RPT5	202	675	397	1274	859	8	0	66	25	42	75	5	17	36	266	904	2
TCB3	279	448	307	1034	1007	0	1	72	28	64	52	3	18	29	266	905	11
GDI1	260	733	505	1498	753	0	3	82	18	55	57	9	20	24	265	906	8
PHS1	259	589	363	1211	889	0	1	78	22	52	45	1	20	47	265	907	0
ETT1	193	475	325	993	1051	3	1	57	16	47	70	2	24	49	265	908	1
LEU9	147	335	238	720	1392	2	1	82	20	49	50	7	18	39	265	909	3
RPA135	184	239	166	589	1666	11	1	67	22	61	41	4	12	58	265	910	20
URA6	289	755	501	1545	727	1	0	72	27	55	42	1	11	56	264	911	3
UBP6	206	472	317	995	1046	4	2	52	20	31	98	1	29	33	264	912	2
RLI1	162	348	215	725	1379	0	1	56	16	40	64	8	25	55	264	913	2
SEC11	193	610	437	1240	875	1	2	63	31	45	55	0	17	52	263	914	0
CLU1	185	409	297	891	1163	5	3	78	24	65	48	0	14	34	263	915	15
DEF1	207	319	211	737	1359	1	2	50	17	37	83	3	41	32	263	916	4
TMA10	336	668	443	1447	774	0	3	76	39	44	68	5	30	0	262	917	0
PHB2	198	753	451	1402	796	0	2	52	33	51	69	2	22	33	262	918	4
RCF2	216	651	420	1287	852	1	1	69	28	42	50	4	15	54	262	919	2
DBP3	176	416	285	877	1174	2	0	53	16	40	40	1	24	88	262	920	3
MVD1	133	438	260	831	1225	3	0	60	28	43	68	1	16	46	262	921	3
KRR1	195	573	340	1108	945	3	1	59	18	43	51	0	15	75	261	922	0
ZPR1	248	397	292	937	1114	2	1	68	44	56	29	1	16	47	261	923	3
SPF1	165	352	233	750	1339	0	0	85	25	63	38	4	11	35	261	924	10
GSY2	201	880	585	1666	672	1	1	70	32	60	71	2	21	4	260	925	9
ARC40	200	815	559	1574	709	0	0	66	27	40	62	4	24	37	260	926	1
POB3	90	376	240	706	1423	6	1	36	13	49	99	1	27	35	260	927	1
MAP2	190	719	429	1338	822	3	2	55	17	50	73	2	27	35	259	928	0
PRO2	243	684	377	1304	838	2	1	85	20	54	38	4	12	46	259	929	4
SWP1	366	851	568	1785	627	2	1	82	14	19	85	2	20	36	258	930	2
CCS1	290	587	362	1239	877	0	1	68	38	53	37	0	12	50	258	931	0
TYE7	247	545	373	1165	906	1	0	42	15	39	67	4	30	61	258	932	1
KES1	220	728	444	1392	798	2	1	70	15	42	65	5	25	35	257	933	2
SEC27	192	523	395	1110	943	7	0	69	30	57	55	1	16	29	257	934	10
MIS1	215	386	251	852	1195	12	2	48	31	70	39	2	6	61	257	935	4
RKI1	146	376	210	732	1370	4	2	57	29	56	35	2	14	64	257	936	2
OM14	206	847	577	1630	686	0	1	35	16	33	116	14	27	15	256	937	1
SOL3	201	539	365	1105	949	2	0	68	29	48	52	3	10	46	256	938	1
TED1	202	495	382	1079	973	1	2	66	30	52	52	2	18	36	256	939	0
RPA49	170	397	254	821	1240	3	1	42	17	57	58	0	15	67	256	940	5
SKP1	273	962	690	1925	585	12	2	53	35	76	27	2	15	47	255	941	2
MNN10	229	556	382	1167	903	4	0	75	17	49	41	3	19	51	255	942	1
CRP1	195	327	233	755	1335	0	0	48	20	42	61	7	35	42	255	943	4
KAP123	167	212	168	547	1779	1	1	62	31	46	54	2	16	44	255	944	13
RPN10	289	859	536	1684	662	2	2	78	25	40	38	2	15	56	254	945	3
FPR2	201	694	419	1314	833	4	2	61	41	43	55	2	16	36	254	946	1
BFR1	217	775	540	1532	730	1	2	63	32	51	59	0	17	31	253	947	3
STE24	205	481	356	1042	1001	1	1	64	29	54	47	1	17	41	253	948	1
RPN11	244	798	512	1554	722	3	5	54	19	30	78	4	34	33	252	949	1
COX5B	210	1122	708	2040	549	1	3	50	22	30	100	9	31	8	250	950	2
MDH3	227	765	482	1474	764	8	2	58	25	46	57	5	17	42	250	951	2
HMT1	144	584	364	1092	960	2	2	40	21	28	50	4	10	97	250	952	0
GNP1	201	389	265	855	1192	1	1	62	25	46	62	2	14	39	250	953	4
ALD5	219	665	438	1322	827	2	2	64	16	32	57	2	35	43	249	954	7
DSK2	258	377	238	873	1178	0	0	61	32	54	58	2	12	30	249	955	3
PPX1	136	356	209	701	1434	0	1	34	19	35	82	2	19	58	249	956	1
VPS1	216	602	397	1215	887	0	2	56	19	44	61	3	20	44	247	957	3
SQT1	150	331	181	662	1502	5	0	25	11	37	60	4	27	83	247	958	2
OAC1	227	318	221	766	1317	3	0	58	24	51	41	3	14	55	246	959	3
STE6	200	231	174	605	1628	2	2	70	18	66	51	1	12	28	246	960	7
RPA190	191	238	159	588	1671	12	1	69	19	42	38	2	17	59	246	961	30
ARC18	219	983	663	1865	602	1	0	58	29	37	68	4	20	29	245	962	1
EMC5	215	639	395	1249	872	6	0	58	34	37	40	8	15	53	245	963	1
QDR2	143	512	370	1025	1013	1	5	51	28	42	79	3	24	18	245	964	2
YIP5	147	507	324	978	1064	1	1	43	16	41	72	9	33	31	245	965	2
HOC1	200	385	261	846	1200	4	1	70	31	49	43	2	14	36	245	966	2
LOC1	136	399	239	774	1305	0	1	38	15	35	64	2	23	68	245	967	2
KRE6	138	299	224	661	1505	4	3	68	33	57	37	4	20	25	244	968	8
MYO2	154	256	150	560	1740	2	0	55	10	59	50	3	14	53	244	969	7
NOG1	88	219	167	474	2000	4	0	59	21	40	30	2	25	67	244	970	9
PKR1	141	397	245	783	1289	0	1	60	32	34	52	1	14	50	243	971	1
XRN1	176	321	223	720	1391	2	4	70	19	67	40	1	18	28	243	972	29
AUR1	97	211	140	448	2078	3	1	77	21	38	42	1	20	44	243	973	5
AYR1	240	1093	676	2009	559	1	2	74	41	48	45	2	19	13	242	974	1
QCR2	164	807	545	1516	739	1	5	40	15	33	98	4	24	27	241	975	2
SRP1	254	574	388	1216	886	8	1	69	37	45	43	0	14	33	241	976	3
CHS1	173	327	203	703	1428	0	0	59	21	66	55	3	21	16	241	977	7
MXR1	165	1015	697	1877	597	1	1	40	17	38	93	6	15	31	240	978	0
UMP1	281	917	573	1771	631	0	1	64	27	38	56	5	16	34	240	979	0
MNP1	232	867	576	1675	670	4	3	69	23	40	54	3	18	33	240	980	0
RPT3	235	724	520	1479	763	1	1	55	21	45	51	2	17	49	240	981	0
ATG27	245	552	389	1186	895	1	2	33	23	55	62	3	20	44	240	982	1
UBC1	200	611	360	1171	902	3	4	51	18	51	54	5	20	41	240	983	1
SCW11	203	359	276	838	1212	1	3	36	11	38	67	2	24	62	240	984	4
VCX1	132	337	229	698	1442	3	2	57	23	42	79	2	19	18	240	985	0
ATP20	186	1000	736	1922	586	3	1	47	23	31	67	7	20	44	239	986	1
NAP1	234	720	470	1424	787	2	0	59	29	50	43	3	16	39	239	987	4
LSM1	251	687	422	1360	811	0	1	59	22	51	50	1	12	44	239	988	1
EXP1	219	628	336	1183	897	6	2	54	26	53	43	2	10	51	239	989	1
LSM12	200	552	352	1104	950	4	0	46	19	38	62	3	25	46	239	990	0
EMC1	237	476	324	1037	1005	0	1	55	18	39	53	4	14	55	238	991	7
POM33	159	490	271	920	1135	0	1	49	14	28	86	4	37	20	238	992	0
HAS1	214	405	277	896	1158	1	1	47	18	51	48	4	13	57	238	993	3
RNR1	182	330	250	762	1322	2	1	67	21	45	32	4	13	56	238	994	11
SEC21	213	603	387	1203	891	5	3	41	23	56	49	2	20	46	237	995	7
TRP2	149	497	339	985	1062	2	1	80	32	49	32	0	12	32	237	996	1
FRD1	117	410	239	766	1318	2	0	53	22	41	70	4	23	24	237	997	1
TPO4	184	324	235	743	1351	0	0	52	25	51	66	2	37	4	237	998	1
SNR191	112	251	170	533	1810	201	20	36	12	24	40	8	33	84	237	999	64
MTD1	125	989	627	1741	641	0	1	32	18	28	84	4	32	38	236	1000	2
GIM3	184	679	435	1298	845	3	1	59	26	32	46	2	24	47	236	1001	0
LTP1	218	618	402	1238	878	3	2	65	23	47	40	4	18	39	236	1002	1
ZRT2	144	638	431	1213	888	4	2	46	18	34	83	2	25	27	235	1003	1
PPN1	162	404	288	854	1193	0	2	65	15	60	51	3	15	26	235	1004	5
FMP52	134	350	241	725	1380	3	0	67	31	41	47	3	21	25	235	1005	2
YBL036C	127	356	228	711	1411	3	1	43	12	28	59	3	31	59	235	1006	4
YOR343C-B	175	262	203	640	1543	4	0	63	28	53	38	2	18	33	235	1007	63
ESF1	251	522	378	1151	913	2	0	55	17	44	45	0	15	58	234	1008	5
GET1	229	538	369	1136	927	3	2	47	26	39	66	2	25	29	234	1009	1
OST4	236	420	262	918	1137	0	1	64	30	28	56	5	14	37	234	1010	0
SER33	134	883	581	1598	697	2	2	50	13	33	75	5	24	33	233	1011	1
FUM1	175	490	357	1022	1017	0	5	58	23	41	64	1	17	29	233	1012	0
CGR1	184	523	287	994	1049	2	2	39	20	33	56	2	20	63	233	1013	0
IZH1	100	512	375	987	1058	1	3	19	12	18	73	7	30	74	233	1014	2
YMR315W	262	906	635	1803	619	0	2	61	31	53	50	2	22	13	232	1015	3
GET4	218	619	374	1211	890	3	0	47	28	61	47	4	8	37	232	1016	1
TAF14	171	587	368	1126	936	1	5	56	21	40	53	2	12	48	232	1017	0
COX7	330	785	537	1652	677	1	1	54	25	30	71	3	18	30	231	1018	0
TPM2	263	826	471	1560	717	3	0	50	27	48	41	1	11	53	231	1019	1
TOA2	143	492	340	975	1068	7	1	52	25	29	56	4	28	37	231	1020	0
MNN2	212	450	288	950	1095	1	3	58	27	47	47	4	14	34	231	1021	3
CPR4	179	448	319	946	1102	0	3	48	22	35	79	2	29	16	231	1022	0
TOH1	132	398	238	768	1315	4	0	73	16	38	65	0	24	15	231	1023	5
PDR16	191	468	268	927	1125	2	0	42	15	34	64	2	20	53	230	1024	1
ENV9	145	329	222	696	1444	7	0	36	27	34	42	0	19	72	230	1025	2
DAP1	143	719	440	1302	841	1	3	22	7	27	99	7	41	26	229	1026	0
GRX3	198	534	323	1055	994	2	0	70	23	46	35	3	13	38	228	1027	3
HIP1	169	301	184	654	1518	2	1	69	21	45	37	0	11	45	228	1028	2
ATO3	204	124	96	424	2165	0	0	87	28	65	17	1	5	25	228	1029	0
RPB4	192	646	385	1223	883	0	2	60	18	41	48	1	15	44	227	1030	0
UBC6	158	439	328	925	1129	1	1	44	18	40	66	4	17	38	227	1031	2
LSM3	162	428	281	871	1181	4	0	32	16	34	70	2	27	46	227	1032	0
PSE1	179	287	210	676	1473	7	3	73	13	27	43	1	12	58	227	1033	12
RRP5	141	262	152	555	1760	5	2	67	19	40	32	2	14	53	227	1034	24
BRE5	88	232	168	488	1956	1	2	34	10	27	78	4	40	34	227	1035	3
TPD3	162	569	418	1149	915	1	1	60	20	57	47	2	15	25	226	1036	1
CNB1	191	621	322	1134	929	5	0	60	26	38	45	1	15	41	226	1037	2
STP4	275	338	225	838	1211	0	1	62	17	38	48	2	18	41	226	1038	0
SHM1	148	397	282	827	1230	5	3	70	39	57	26	1	11	22	226	1039	4
PRS5	125	340	223	688	1455	10	0	55	17	45	41	5	16	47	226	1040	2
SNQ2	166	139	113	418	2200	2	1	63	26	58	25	1	9	44	226	1041	15
MRPS12	213	713	451	1377	803	4	0	63	15	12	66	1	32	36	225	1042	3
RPB2	162	359	265	786	1284	3	3	59	18	53	47	1	12	35	225	1043	10
ECM14	211	510	367	1088	967	0	3	58	24	34	58	3	24	23	224	1044	2
AIM45	138	426	299	863	1187	2	0	41	14	33	63	4	31	38	224	1045	3
RIB5	174	876	539	1589	701	5	1	55	20	41	62	1	11	33	223	1046	2
RFA3	180	531	356	1067	985	1	1	52	30	37	39	3	16	46	223	1047	0
PNO1	138	406	300	844	1202	2	0	42	26	37	35	2	13	68	223	1048	2
NSG2	110	449	252	811	1253	0	0	36	16	32	75	1	31	32	223	1049	1
OST3	100	217	177	494	1933	0	1	57	12	38	65	1	23	27	223	1050	2
IGO1	232	572	438	1242	874	0	0	54	35	33	51	4	16	29	222	1051	1
CCP1	187	544	324	1055	995	3	0	48	18	42	60	4	22	28	222	1052	1
MRPS18	130	420	289	839	1209	0	0	42	16	27	69	4	24	40	222	1053	3
RIE1	159	337	227	723	1384	4	2	49	21	53	54	1	16	28	222	1054	4
FPS1	123	293	188	604	1632	0	2	45	22	54	54	3	8	36	222	1055	4
GSY1	210	949	631	1790	624	0	3	42	19	33	91	6	29	1	221	1056	1
PTM1	172	560	404	1136	928	1	0	60	23	49	45	0	12	32	221	1057	2
NOP2	181	424	289	894	1159	6	1	47	11	30	45	2	21	65	221	1058	2
BAR1	263	307	229	799	1266	0	1	63	29	43	47	3	13	23	221	1059	5
ALD4	149	732	496	1377	804	2	2	58	26	43	64	3	17	9	220	1060	0
CAP1	161	778	499	1438	781	1	1	59	34	46	45	2	13	20	219	1061	1
NAT5	214	494	293	1001	1034	4	1	74	19	34	25	2	9	56	219	1062	1
SAC1	193	492	310	995	1047	6	2	62	25	59	37	2	12	21	218	1063	3
GCS1	189	440	272	901	1154	2	0	62	25	44	33	1	11	42	218	1064	0
PDX3	188	787	473	1448	773	1	0	49	26	27	53	4	22	36	217	1065	1
DOT6	206	536	330	1072	980	1	3	37	14	19	80	5	27	35	217	1066	2
AIM17	206	386	282	874	1177	0	2	66	29	54	44	1	23	0	217	1067	4
MSC7	200	360	247	807	1257	1	0	51	22	32	65	4	23	20	217	1068	0
YOR283W	97	441	238	776	1300	0	0	27	11	31	64	2	22	60	217	1069	0
YHR138C	205	661	410	1276	858	1	2	37	21	27	90	3	27	11	216	1070	0
LYP1	202	490	296	988	1055	7	5	51	24	45	53	4	10	29	216	1071	1
HHO1	167	459	317	943	1106	0	1	42	9	29	62	2	21	51	216	1072	1
ORM2	241	526	298	1065	986	0	0	79	25	20	43	1	20	27	215	1073	0
HEK2	204	492	361	1057	993	2	0	56	20	35	44	2	19	39	215	1074	7
APQ12	171	537	316	1024	1014	1	2	48	22	28	59	4	22	32	215	1075	2
NOP16	134	507	317	958	1085	1	0	34	18	35	44	2	23	59	215	1076	0
ALB1	125	423	272	820	1242	3	0	41	14	23	33	0	11	93	215	1077	1
MIC19	109	414	262	785	1285	0	0	32	12	28	78	2	28	35	215	1078	1
NOC2	119	278	181	578	1699	2	0	46	17	35	38	0	9	70	215	1079	3
KGD2	133	702	492	1327	826	1	2	41	22	32	69	4	25	21	214	1080	3
MIA40	178	706	423	1307	837	1	0	43	33	32	60	1	10	35	214	1081	2
AGE1	116	452	262	830	1228	0	0	33	15	30	65	2	20	49	214	1082	2
MNN5	160	292	158	610	1612	7	0	65	17	50	35	2	17	28	214	1083	1
YCK2	81	238	164	483	1973	2	2	57	23	41	41	6	15	31	214	1084	3
TLC1	88	234	142	464	2032	9	4	52	22	40	43	2	13	42	214	1085	43
ERG28	161	1193	743	2097	532	0	3	24	20	16	97	2	33	21	213	1086	0
NSA2	130	480	292	902	1153	5	2	56	25	42	30	0	5	55	213	1087	3
LIP1	283	840	574	1697	654	0	2	71	26	51	30	3	12	19	212	1088	0
GPP2	160	883	569	1612	694	0	1	69	25	24	61	3	14	16	212	1089	3
UIP3	217	570	361	1148	917	0	1	55	25	54	42	1	16	19	212	1090	0
GRX5	147	495	305	947	1101	0	0	43	22	25	57	3	17	45	212	1091	0
RPB9	143	462	275	880	1173	4	3	37	19	34	58	3	27	34	212	1092	0
PHO11	64	768	559	1391	801	1	3	10	12	12	120	7	42	8	211	1093	1
NIT3	189	645	449	1283	855	0	1	56	25	41	26	3	13	47	211	1094	1
APD1	221	629	419	1269	861	6	2	57	22	49	52	1	8	22	211	1095	2
BUR6	209	579	361	1149	914	0	0	36	12	28	63	5	29	38	211	1096	1
GCN20	153	483	331	967	1075	11	3	51	35	40	34	2	14	35	211	1097	9
RPF2	136	406	291	833	1221	2	1	41	16	20	41	2	11	80	211	1098	1
COS3	128	290	221	639	1547	3	3	63	24	43	60	1	10	10	211	1099	0
YPK1	139	525	334	998	1042	4	1	49	26	49	53	1	10	22	210	1100	0
ERG5	98	500	367	965	1078	0	2	30	17	24	73	1	27	38	210	1101	1
AIP1	177	486	297	960	1082	0	1	44	17	38	73	3	8	27	210	1102	0
SLG1	146	346	265	757	1329	0	0	59	21	40	44	2	9	35	210	1103	0
HNM1	95	361	249	705	1427	4	2	55	18	34	45	1	18	39	210	1104	2
MAE1	206	236	178	620	1586	3	0	43	23	44	27	2	16	55	210	1105	8
LSC1	200	827	560	1587	703	1	1	56	17	29	52	4	22	29	209	1106	1
MET14	100	835	511	1446	777	0	2	30	10	22	94	6	33	14	209	1107	0
YJU3	207	502	327	1036	1006	2	2	55	35	37	39	0	11	32	209	1108	3
NOP6	143	433	242	818	1245	1	0	35	14	22	51	4	19	64	209	1109	0
DIC1	185	357	232	774	1302	6	0	58	19	38	49	3	12	30	209	1110	3
DED1	93	192	120	405	2259	13	3	51	6	20	70	8	39	15	209	1111	5
TMA22	248	808	519	1575	708	0	2	58	23	33	41	2	8	43	208	1112	2
VPS55	201	714	404	1319	830	0	1	47	23	26	76	2	14	20	208	1113	2
BDH1	140	587	388	1115	940	1	1	36	16	27	89	3	26	11	208	1114	3
ARO7	114	413	234	761	1326	3	0	43	24	42	29	2	16	52	208	1115	1
PWP1	126	295	224	645	1534	2	0	31	18	38	30	1	9	81	208	1116	2
IMD2	98	549	399	1046	999	1	0	34	10	31	95	8	22	7	207	1117	1
HXT6	32	589	372	993	1053	0	0	5	4	10	132	7	47	2	207	1118	2
CDC3	186	492	311	989	1054	0	3	39	19	29	72	1	17	30	207	1119	1
CUE1	170	489	317	976	1065	9	0	47	15	29	61	2	18	35	207	1120	3
BET3	96	302	192	590	1664	1	0	52	22	31	49	5	24	24	207	1121	0
PBI2	242	927	594	1763	635	0	0	57	11	4	75	4	37	18	206	1122	2
ELF1	155	892	511	1558	719	0	1	32	18	27	55	2	29	43	206	1123	1
SLT2	236	535	371	1142	922	2	0	64	17	45	43	2	15	20	206	1124	2
QCR10	99	535	409	1043	1000	3	0	36	15	26	71	7	28	23	206	1125	0
ISU1	186	503	311	1000	1040	0	4	45	17	35	44	4	9	52	206	1126	5
FRQ1	140	432	280	852	1196	1	2	36	19	28	68	5	21	28	205	1127	2
YAR1	197	375	253	825	1234	1	3	50	21	43	27	2	11	51	205	1128	1
IDP1	89	401	234	724	1383	7	5	60	33	44	43	1	15	9	205	1129	7
DCW1	191	509	305	1005	1030	3	1	52	18	40	47	2	13	32	204	1130	0
TOM20	169	456	314	939	1113	1	0	56	13	25	43	4	25	38	204	1131	1
HEM12	181	382	232	795	1272	1	1	55	20	42	38	1	12	36	204	1132	1
ARX1	135	239	187	561	1738	11	1	29	14	27	38	0	9	87	204	1133	4
RIB3	272	904	616	1792	622	8	0	63	21	14	59	2	26	18	203	1134	2
RVS167	283	699	514	1496	755	0	1	55	32	51	31	1	5	28	203	1135	0
RPB11	179	730	495	1404	795	0	2	50	19	33	49	2	13	37	203	1136	0
SEC62	246	616	441	1303	839	1	4	49	27	34	32	2	14	45	203	1137	2
PPH21	159	562	352	1073	979	0	4	63	18	32	37	3	11	39	203	1138	2
ALE1	155	513	325	993	1052	0	5	52	22	26	54	0	22	27	203	1139	2
AGA2	262	384	287	933	1117	0	2	66	26	52	34	0	8	17	203	1140	0
EMP47	173	433	255	861	1189	4	1	58	21	44	37	2	17	24	203	1141	1
CWH43	142	295	198	635	1560	2	0	48	23	42	49	2	18	21	203	1142	6
PTR2	103	301	223	627	1577	2	1	48	13	28	68	4	36	6	203	1143	10
ADE2	116	833	548	1497	754	5	0	46	18	36	60	3	15	24	202	1144	4
SEC72	183	566	379	1128	934	0	1	41	14	30	53	4	23	37	202	1145	1
TUB3	223	520	358	1101	953	5	1	66	7	11	49	4	36	29	202	1146	1
PAN5	197	486	317	1000	1039	1	0	51	22	33	53	2	7	34	202	1147	1
ILM1	161	453	316	930	1123	1	2	59	29	36	50	3	10	15	202	1148	0
PER33	180	378	272	830	1227	0	0	53	13	35	42	1	26	32	202	1149	0
DAP2	145	373	287	805	1260	1	1	42	19	60	42	3	17	19	202	1150	2
CPT1	134	299	170	603	1633	1	1	64	24	46	30	0	11	27	202	1151	2
SPT5	138	193	181	512	1880	3	0	41	13	43	51	0	20	34	202	1152	9
ISD11	191	657	399	1247	873	3	3	54	29	27	39	3	14	35	201	1153	4
SRP68	156	445	310	911	1144	9	0	46	20	28	44	2	13	48	201	1154	1
SLC1	180	429	283	892	1160	0	0	77	17	30	41	2	9	25	201	1155	1
ERV41	184	402	240	826	1232	3	0	53	23	45	42	0	7	31	201	1156	1
TRM82	158	347	216	721	1389	0	0	39	23	34	33	1	11	60	201	1157	1
NCB2	200	545	376	1121	937	1	3	46	20	32	44	2	13	43	200	1158	1
GFA1	187	534	396	1117	939	3	1	47	19	36	59	1	11	27	200	1159	6
ATX1	147	569	375	1091	961	6	0	47	25	26	54	5	14	29	200	1160	1
STE4	193	530	344	1067	984	3	0	37	27	44	46	1	9	36	200	1161	2
MRP2	159	516	351	1026	1011	1	1	55	27	31	44	2	8	33	200	1162	1
SEC26	176	401	315	892	1161	6	2	55	18	47	44	3	11	22	200	1163	9
CKA1	109	329	187	625	1581	1	1	41	12	57	38	3	14	35	200	1164	2
THO1	195	627	479	1301	843	0	2	51	19	23	56	2	22	26	199	1165	0
RLP24	202	653	425	1280	856	0	3	38	27	29	33	0	10	62	199	1166	2
CAJ1	176	612	391	1179	899	1	3	52	12	50	39	1	7	38	199	1167	2
CDC10	180	600	386	1166	905	2	0	46	21	35	52	2	13	30	199	1168	1
SDD3	137	264	215	616	1598	3	0	47	16	46	41	2	16	31	199	1169	3
END3	155	631	451	1237	879	1	1	55	22	34	44	2	18	23	198	1170	1
NTH1	153	536	370	1059	991	0	1	53	23	50	52	1	13	6	198	1171	6
CRM1	123	311	263	697	1443	4	0	53	16	47	39	1	6	36	198	1172	9
UBC7	234	636	448	1318	831	0	0	45	27	29	48	2	16	30	197	1173	0
SHP1	255	575	428	1258	867	3	2	49	19	43	42	2	15	27	197	1174	1
ERG27	189	565	384	1138	926	3	2	56	28	39	27	2	14	31	197	1175	1
RPB7	181	556	367	1104	951	1	1	43	19	26	49	1	16	43	197	1176	1
SNF7	91	434	253	778	1296	0	1	32	16	27	54	1	41	26	197	1177	3
SLA1	141	372	251	764	1320	0	0	46	19	48	46	0	20	18	197	1178	7
COM2	230	247	160	637	1556	2	1	66	31	45	20	0	8	27	197	1179	5
TPA1	170	284	171	625	1579	5	0	43	13	37	37	1	9	57	197	1180	4
RSN1	133	267	205	605	1629	2	0	64	17	56	24	1	9	26	197	1181	6
MDH2	151	830	532	1513	741	0	3	19	17	14	59	1	21	65	196	1182	2
CHS5	176	563	401	1140	923	0	2	49	28	39	50	3	11	16	196	1183	5
PYC2	108	561	427	1096	958	4	3	50	21	30	56	3	10	26	196	1184	5
CAR1	97	350	224	671	1489	5	1	39	14	38	37	1	20	47	196	1185	2
GCN1	105	209	153	467	2018	1	2	62	18	40	38	2	7	29	196	1186	33
TIM13	180	568	378	1126	935	0	1	42	17	42	36	3	22	33	195	1187	1
YMR027W	138	406	277	821	1241	1	0	47	17	38	51	2	9	31	195	1188	0
RPC11	190	367	230	787	1280	1	1	54	17	29	36	1	19	39	195	1189	1
EIS1	120	343	260	723	1385	1	0	29	14	35	79	4	21	13	195	1190	5
IPT1	151	278	173	602	1637	2	2	43	25	32	40	1	13	41	195	1191	1
RRP7	140	451	367	958	1084	0	1	33	18	29	44	3	10	57	194	1192	2
CUZ1	161	472	298	931	1122	3	1	37	15	46	48	0	15	33	194	1193	0
RHO3	145	434	293	872	1179	4	1	37	22	33	43	1	7	51	194	1194	1
HOM3	117	440	285	842	1208	0	2	36	12	28	66	8	17	27	194	1195	5
RCK2	202	641	421	1264	864	6	2	48	18	44	46	3	16	18	193	1196	3
RVB2	143	465	282	890	1166	4	0	49	12	30	47	3	10	42	193	1197	2
HEM15	116	348	250	714	1403	1	3	50	12	37	51	5	21	17	193	1198	1
MCM1	161	287	200	648	1528	0	0	30	12	33	49	5	25	39	193	1199	0
YPS1	112	225	140	477	1986	1	4	53	23	59	39	1	12	6	193	1200	3
SYG1	96	175	134	405	2258	3	0	39	26	33	32	5	19	39	193	1201	6
ICY1	192	1118	710	2020	555	2	1	34	20	30	62	6	24	16	192	1202	0
ALO1	148	353	261	762	1323	0	0	38	24	39	34	2	18	37	192	1203	2
YPR1	182	564	407	1153	912	0	0	54	14	50	34	2	9	28	191	1204	2
ERG24	150	346	220	716	1399	1	1	56	26	31	44	3	10	21	191	1205	2
HIS3	158	636	433	1227	881	2	2	36	17	26	57	3	17	34	190	1206	0
BTN2	311	518	324	1153	911	0	2	64	35	34	35	3	9	10	190	1207	0
STE18	175	497	346	1018	1021	1	0	36	16	33	58	6	21	20	190	1208	0
ERO1	222	439	305	966	1077	7	2	58	18	46	34	0	7	27	190	1209	3
PIN3	179	335	202	716	1398	0	0	55	21	26	55	2	16	15	190	1210	2
PGM1	116	323	225	664	1498	1	0	45	17	34	48	1	20	25	190	1211	3
SRM1	143	296	171	610	1613	1	0	46	18	37	36	2	9	42	190	1212	1
MDE1	130	288	175	593	1655	3	0	27	8	29	53	8	35	30	190	1213	1
SEC17	194	660	443	1297	846	3	0	62	24	23	35	6	18	21	189	1214	0
CRN1	181	511	392	1084	970	4	2	56	24	40	27	2	10	30	189	1215	3
SNF4	162	506	308	976	1066	2	0	54	27	30	31	0	16	31	189	1216	2
GLC3	128	758	505	1391	800	0	2	46	16	30	74	6	15	1	188	1217	2
UBC13	155	459	328	942	1108	0	0	47	21	27	49	3	7	34	188	1218	1
RRS1	108	292	243	643	1538	0	1	32	9	24	34	0	14	75	188	1219	1
RMT2	124	275	157	556	1755	4	1	48	15	32	35	3	11	44	188	1220	3
ROT1	233	623	444	1300	844	3	0	44	17	36	47	3	12	28	187	1221	4
HIS5	132	501	322	955	1089	0	2	38	15	18	68	0	22	26	187	1222	2
EMG1	157	434	313	904	1149	3	2	45	23	34	19	2	10	54	187	1223	2
RET2	156	327	225	708	1417	2	0	37	23	39	39	5	17	27	187	1224	6
PRP43	120	277	164	561	1739	1	1	44	12	38	32	2	7	52	187	1225	0
SDH2	120	647	409	1176	900	0	4	19	13	21	89	1	31	12	186	1226	0
YPT52	142	558	384	1084	971	1	1	49	11	15	69	1	14	27	186	1227	1
MKT1	164	462	310	936	1115	1	3	49	10	49	48	1	9	20	186	1228	9
GIM5	141	363	259	763	1321	0	0	44	20	28	37	2	14	41	186	1229	0
SER2	147	372	216	735	1365	1	1	45	14	28	49	2	10	38	186	1230	1
SHS1	99	261	185	545	1786	0	2	27	12	30	62	9	21	25	186	1231	2
CKB2	181	548	361	1090	965	2	0	53	18	39	31	5	13	26	185	1232	2
SMI1	171	445	333	949	1097	2	1	32	21	43	30	1	16	42	185	1233	0
ENT2	131	343	237	711	1410	0	1	31	13	29	67	4	24	17	185	1234	2
YBR056W	162	521	357	1040	1004	1	0	61	14	32	58	5	8	6	184	1235	2
SRP72	148	401	267	816	1247	3	1	42	19	42	22	1	16	42	184	1236	1
DRE2	169	372	258	799	1267	1	0	57	20	31	27	4	11	34	184	1237	1
AHA1	243	304	209	756	1333	0	0	66	33	37	17	1	6	24	184	1238	2
AKR1	177	292	205	674	1475	3	0	55	24	49	34	0	9	13	184	1239	5
KTR6	152	297	196	645	1533	3	1	42	19	43	35	0	14	31	184	1240	1
YGR054W	152	236	157	545	1784	0	3	40	19	29	42	3	12	39	184	1241	1
ALK1	96	157	120	373	2413	0	1	25	10	31	66	2	18	32	184	1242	3
ARG4	90	609	430	1129	933	2	4	28	8	24	80	5	25	13	183	1243	4
SCD6	159	491	304	954	1090	0	0	39	14	26	47	3	20	34	183	1244	1
MTC1	173	464	306	943	1105	1	1	53	13	36	35	0	14	32	183	1245	3
BCP1	180	398	231	809	1255	10	0	41	19	37	22	1	4	59	183	1246	3
GPI16	183	364	257	804	1261	1	2	57	9	42	34	2	15	24	183	1247	3
PMR1	105	222	168	495	1931	2	1	53	22	36	47	1	12	12	183	1248	11
RIP1	136	696	428	1260	866	0	1	22	15	27	70	4	25	19	182	1249	0
PRX1	149	593	401	1143	920	0	0	34	25	21	70	4	17	11	182	1250	0
DUF1	102	643	369	1114	941	0	0	29	11	29	69	3	17	24	182	1251	2
LAP2	168	481	347	996	1043	1	1	53	22	36	37	1	6	27	182	1252	3
CKB1	141	436	309	886	1169	2	0	35	12	22	51	0	20	42	182	1253	2
BUD20	130	427	267	824	1239	1	1	31	21	30	38	0	8	54	182	1254	1
LRP1	125	372	260	757	1331	1	0	31	13	26	46	2	15	49	182	1255	1
CTR2	126	399	223	748	1344	0	0	39	15	29	52	2	9	36	182	1256	0
TCB1	137	354	244	735	1367	2	2	42	19	35	52	4	17	13	182	1257	4
ABP140	143	335	240	718	1395	1	1	45	19	35	38	2	13	30	182	1258	2
DIM1	142	331	215	688	1454	6	1	42	16	34	25	0	6	59	182	1259	1
NTS1-2	75	71	41	187	3855	5	5	11	5	23	48	1	48	46	182	1260	70
NAT1	182	394	257	833	1220	1	1	51	20	49	21	1	6	33	181	1261	8
EFM5	141	405	268	814	1249	1	1	39	15	33	41	1	10	42	181	1262	1
DTD1	151	360	265	776	1299	3	1	44	21	37	37	1	8	33	181	1263	0
AVT1	148	303	221	672	1485	9	3	47	19	31	33	8	6	37	181	1264	2
RNQ1	127	265	190	582	1687	1	1	32	20	32	44	3	18	32	181	1265	2
DIP2	93	193	150	436	2123	3	1	34	14	54	30	2	9	38	181	1266	9
PAM17	176	514	315	1005	1031	0	0	39	30	27	38	1	12	33	180	1267	0
MRPL51	145	528	322	995	1048	3	1	32	11	23	73	1	16	24	180	1268	2
SEC65	169	473	311	953	1091	2	1	40	13	24	48	3	16	36	180	1269	0
CYB5	118	432	288	838	1215	0	2	35	14	28	38	2	18	45	180	1270	3
RPA12	162	380	263	805	1259	0	0	35	8	23	36	1	12	65	180	1271	1
YCK1	167	395	241	803	1262	0	2	40	13	24	49	0	10	44	180	1272	1
SUA7	113	316	188	617	1595	4	1	41	20	26	47	2	21	23	180	1273	2
TAT2	94	180	111	385	2362	1	0	32	13	27	46	1	23	38	180	1274	6
URA2	96	128	103	327	2688	1	0	46	15	40	29	2	13	35	180	1275	30
CKA2	151	515	358	1024	1015	0	1	31	20	31	42	2	14	39	179	1276	1
PCM1	166	434	292	892	1162	8	0	48	25	41	32	3	7	23	179	1277	3
LSC2	98	636	424	1158	909	4	0	41	24	26	50	2	20	15	178	1278	2
HRR25	166	512	373	1051	997	1	1	29	12	31	36	1	20	49	178	1279	3
BCY1	155	504	342	1001	1036	0	0	49	15	29	54	3	13	15	178	1280	0
TCB2	155	234	194	583	1686	3	1	48	20	51	21	2	12	24	178	1281	2
GCD6	128	274	176	578	1698	3	0	53	10	31	31	2	12	39	178	1282	6
DRS1	145	178	146	469	2012	6	1	42	19	37	31	1	7	41	178	1283	5
HUT1	90	187	122	399	2296	1	0	30	16	44	48	3	7	30	178	1284	0
CAP2	201	651	494	1346	820	0	1	54	19	40	34	1	13	16	177	1285	2
RDL2	149	550	335	1034	1008	0	0	38	15	31	47	3	18	25	177	1286	0
ADE4	110	543	348	1001	1037	6	3	39	10	29	42	0	9	48	177	1287	6
YPF1	183	367	307	857	1190	0	2	47	19	40	39	1	11	20	177	1288	1
ASH1	198	340	254	792	1275	0	1	38	23	34	55	0	14	13	177	1289	6
RPA43	143	295	205	643	1537	5	1	40	20	35	25	1	11	45	177	1290	1
STF1	120	984	621	1725	646	0	2	20	13	22	81	5	34	1	176	1291	1
ADE8	209	731	443	1383	802	4	0	36	28	43	24	1	10	34	176	1292	0
DPL1	198	425	301	924	1131	1	2	55	23	48	25	1	5	19	176	1293	2
EMC2	138	418	218	774	1304	4	0	39	15	29	47	0	12	34	176	1294	1
HIS7	119	303	217	639	1549	3	0	27	9	49	55	1	9	26	176	1295	1
PRB1	78	331	202	611	1611	0	1	44	12	34	52	4	24	6	176	1296	2
TIM23	226	532	318	1076	975	1	0	31	21	45	32	1	7	38	175	1297	2
SFB3	159	297	218	674	1476	3	1	53	16	35	32	3	13	23	175	1298	4
HEM3	45	141	59	245	3293	2	0	21	6	20	58	0	22	48	175	1299	3
SCR1	3	42	22	67	4888	1329	219	5	1	0	18	7	135	9	175	1300	1100
TIM50	186	461	322	969	1073	1	0	46	23	37	34	1	11	22	174	1301	2
DFG5	163	435	293	891	1164	6	1	42	15	27	54	1	10	25	174	1302	2
GRE3	208	378	257	843	1204	3	0	61	30	30	37	3	6	7	174	1303	0
EBP2	106	428	299	833	1222	3	0	22	13	28	42	2	10	57	174	1304	4
LYS20	183	342	245	770	1311	0	2	48	21	19	32	4	15	35	174	1305	3
GGA2	188	486	311	985	1061	1	1	35	15	33	42	4	14	30	173	1306	3
GLO2	140	421	281	842	1207	3	1	36	23	39	33	0	10	32	173	1307	1
PAN6	122	431	237	790	1277	4	0	46	11	21	47	0	15	33	173	1308	1
MNN11	138	371	227	736	1363	7	3	38	11	34	35	1	16	38	173	1309	1
MRS6	130	292	224	646	1532	4	1	46	12	31	31	0	13	40	173	1310	3
PEP1	135	253	201	589	1667	4	0	45	15	47	31	2	13	20	173	1311	7
TMA16	100	300	171	571	1715	1	1	19	12	28	37	4	17	56	173	1312	0
MEU1	119	265	166	550	1773	6	0	45	16	30	25	1	7	49	173	1313	2
UBP3	87	197	126	410	2243	0	0	30	8	20	64	2	18	31	173	1314	4
CYT1	108	668	420	1196	893	0	2	26	6	22	70	2	32	14	172	1315	0
HEM2	189	533	368	1090	964	0	0	41	18	40	39	1	9	24	172	1316	2
MPC1	158	560	361	1079	974	1	0	32	10	31	61	4	13	21	172	1317	0
AIM7	132	508	348	988	1056	0	3	29	27	31	47	1	13	24	172	1318	2
NIF3	172	508	295	975	1067	5	1	45	26	34	26	1	9	31	172	1319	1
SEC22	156	470	307	933	1118	0	1	49	12	34	43	4	6	24	172	1320	0
CDC12	142	412	257	811	1251	2	0	31	9	26	45	0	16	45	172	1321	3
COX15	105	398	299	802	1263	0	3	50	6	13	58	6	30	9	172	1322	3
CWH41	150	296	212	658	1510	0	1	55	16	50	23	0	11	17	172	1323	2
ODC2	99	584	370	1053	996	0	1	51	14	31	37	1	13	24	171	1324	1
LYS21	182	460	319	961	1081	0	2	40	17	28	52	1	8	25	171	1325	2
SPT4	101	497	354	952	1094	2	0	37	12	23	58	4	9	28	171	1326	2
RSM27	84	332	256	672	1488	1	0	24	13	25	58	0	16	35	171	1327	0
YIF1	148	316	185	649	1526	3	1	39	17	30	48	1	11	25	171	1328	0
PLB3	146	257	203	606	1625	0	1	41	18	39	36	2	10	25	171	1329	7
GDS1	113	267	188	568	1723	2	3	49	19	43	22	1	6	31	171	1330	5
MSC1	157	757	526	1440	779	0	4	36	24	28	60	2	18	2	170	1331	0
GCD1	161	398	276	835	1218	0	0	47	16	24	36	2	11	34	170	1332	7
PXR1	112	194	141	447	2079	2	1	32	14	27	22	2	16	57	170	1333	0
TMA17	111	764	550	1425	786	0	2	30	12	25	64	4	33	1	169	1334	1
MRPL39	141	621	359	1121	938	2	1	42	15	28	45	5	15	19	169	1335	0
ZRT1	43	630	408	1081	972	1	1	9	5	9	92	8	29	17	169	1336	2
IGO2	121	549	341	1011	1025	0	0	45	23	25	46	1	8	21	169	1337	1
GSH2	142	402	294	838	1214	2	2	52	13	37	31	4	7	25	169	1338	3
MID2	184	300	203	687	1456	0	3	43	8	29	46	3	14	26	169	1339	0
RSC8	109	282	220	611	1609	2	1	26	12	26	52	1	15	37	169	1340	1
NUP57	119	271	184	574	1704	5	1	27	21	28	46	2	11	34	169	1341	0
NTS2-1	112	91	62	265	3115	1	4	30	7	32	30	0	17	53	169	1342	12
PRD1	139	448	361	948	1100	1	0	56	22	39	27	1	8	15	168	1343	4
HUB1	113	442	238	793	1274	1	0	37	24	40	37	1	7	22	168	1344	0
PBP1	169	348	210	727	1375	8	0	44	20	46	29	0	10	19	168	1345	4
EDC2	113	350	236	699	1440	0	2	48	20	32	39	2	9	18	168	1346	0
UTP4	110	203	126	439	2113	0	1	33	10	32	22	0	14	57	168	1347	2
COX14	187	427	318	932	1120	0	1	34	14	8	70	4	19	18	167	1348	0
ADP1	143	321	238	702	1431	5	1	54	21	38	35	1	7	11	167	1349	6
OST6	140	293	202	635	1561	1	0	66	9	27	23	0	5	37	167	1350	0
UTP9	117	259	156	532	1817	2	2	26	16	23	27	1	13	61	167	1351	2
MET22	90	507	306	903	1150	1	1	28	21	25	48	4	16	24	166	1352	3
YPD1	173	461	265	899	1157	0	1	39	16	22	37	1	17	34	166	1353	0
FLC1	143	365	279	787	1281	2	2	41	13	32	44	3	14	19	166	1354	5
SXM1	120	207	149	476	1991	3	0	49	10	40	33	0	10	24	166	1355	6
RTS1	135	480	360	975	1069	0	0	40	19	34	37	2	11	22	165	1356	5
REE1	126	487	340	953	1092	0	2	35	14	22	56	1	10	27	165	1357	2
LSB3	176	360	261	797	1270	3	1	40	18	30	51	2	15	9	165	1358	1
PUS7	134	386	267	787	1282	1	2	39	21	37	32	3	7	26	165	1359	2
RRP45	99	320	199	618	1594	2	0	34	16	18	37	1	15	44	165	1360	4
COX17	196	632	446	1274	860	0	4	33	20	16	52	4	20	19	164	1361	0
SSO1	159	541	375	1075	978	0	0	42	23	17	35	1	12	34	164	1362	0
FCF1	150	479	319	948	1099	0	2	49	19	20	26	0	8	42	164	1363	1
GRH1	151	396	291	838	1213	1	0	47	26	26	39	1	7	18	164	1364	3
HST1	121	294	178	593	1656	0	1	31	9	33	50	3	13	25	164	1365	4
UTP10	105	112	92	309	2804	3	0	46	12	40	20	4	7	35	164	1366	20
PTH2	153	417	248	818	1244	1	0	36	22	33	31	1	11	29	163	1367	0
CIP1	368	213	155	736	1361	0	1	53	23	48	21	3	11	4	163	1368	0
URE2	128	329	226	683	1463	0	1	45	18	32	26	2	11	29	163	1369	2
HRB1	124	340	187	651	1525	0	0	22	12	26	53	2	14	34	163	1370	0
CPA1	156	271	211	638	1552	1	2	31	20	37	19	0	9	47	163	1371	3
ACL4	155	275	171	601	1640	6	0	48	18	27	24	1	6	39	163	1372	1
LSM4	211	545	374	1130	932	1	0	44	17	25	34	0	10	32	162	1373	1
YPR148C	155	459	312	926	1127	0	0	47	30	33	25	2	9	16	162	1374	0
ABP1	153	363	264	780	1292	1	1	43	16	36	40	0	10	17	162	1375	4
TYW1	151	259	201	611	1607	4	0	42	10	43	26	2	5	34	162	1376	1
RTC3	322	829	533	1684	661	0	1	48	28	36	31	1	15	2	161	1377	0
AIM6	137	486	319	942	1109	1	3	45	21	36	27	1	10	21	161	1378	1
STP3	194	428	267	889	1168	0	1	29	17	23	49	1	14	28	161	1379	2
PFD1	175	395	259	829	1229	1	1	39	25	35	32	0	8	22	161	1380	0
COA2	144	388	267	799	1268	1	1	30	12	37	56	4	7	15	161	1381	2
OPT1	104	346	226	676	1474	5	0	30	9	18	54	6	19	25	161	1382	2
SAM3	97	163	129	389	2347	4	0	54	19	33	29	4	5	17	161	1383	0
LSO2	150	547	362	1059	992	1	1	34	15	27	37	0	14	33	160	1384	0
RSM18	116	562	310	988	1057	0	2	31	14	21	55	3	16	20	160	1385	2
ERG26	175	488	277	940	1112	3	1	43	16	37	41	0	7	16	160	1386	0
RBL2	149	469	287	905	1148	0	1	40	17	30	35	2	12	24	160	1387	0
QNS1	112	330	221	663	1501	4	0	46	13	42	34	3	7	15	160	1388	1
SLA2	117	301	181	599	1645	0	1	34	17	31	42	3	17	16	160	1389	2
SCT1	72	210	144	426	2160	2	1	26	8	38	50	1	13	24	160	1390	1
DIP5	99	474	359	932	1121	0	0	36	6	16	58	4	24	15	159	1391	1
ESS1	153	474	297	924	1132	1	0	33	20	31	33	1	16	25	159	1392	2
CSE1	153	335	233	721	1390	1	3	52	19	38	20	1	5	24	159	1393	1
ITR2	146	318	217	681	1464	4	0	40	21	27	35	1	15	20	159	1394	9
PFK27	82	259	172	513	1878	0	0	25	12	21	27	1	14	59	159	1395	3
FRA1	94	251	164	509	1890	0	1	43	11	22	44	2	9	28	159	1396	1
MRPL31	129	467	286	882	1171	0	1	30	8	19	57	2	17	25	158	1397	0
AIM9	138	398	290	826	1233	0	1	43	20	26	29	2	17	21	158	1398	2
SVP26	164	346	273	783	1287	0	1	67	17	28	27	1	2	16	158	1399	1
YBR016W	178	371	226	775	1301	0	0	51	19	28	28	3	12	17	158	1400	1
YIP1	147	348	218	713	1404	1	0	48	12	26	33	1	10	28	158	1401	0
YKR018C	109	317	230	656	1514	0	0	51	13	41	30	1	5	17	158	1402	8
YOR342C	126	319	203	648	1530	0	2	21	11	20	41	3	7	55	158	1403	1
RRP17	73	292	174	539	1799	1	0	22	12	20	37	0	7	60	158	1404	1
ARO1	98	225	184	507	1895	3	1	35	17	32	46	2	16	10	158	1405	12
PAT1	74	151	102	327	2689	0	1	34	16	33	39	3	23	10	158	1406	2
AGP1	46	641	476	1163	907	1	2	24	3	12	67	5	26	20	157	1407	0
TAF9	195	451	304	950	1096	0	0	40	22	34	28	2	6	25	157	1408	0
NFU1	145	459	277	881	1172	1	0	42	15	33	31	3	7	26	157	1409	1
TVP23	152	450	275	877	1175	0	0	41	19	20	45	1	11	20	157	1410	0
SFT2	131	461	275	867	1183	3	2	40	11	22	41	4	18	21	157	1411	0
ARI1	117	355	233	705	1426	0	0	58	15	40	20	0	8	16	157	1412	0
SKG1	86	247	192	525	1848	0	4	31	13	26	43	5	14	25	157	1413	4
MKC7	162	158	101	421	2184	0	0	49	8	32	26	1	8	33	157	1414	4
LSG1	100	187	127	414	2218	1	1	31	11	34	16	1	11	53	157	1415	4
GLC8	104	519	295	918	1138	0	0	23	22	24	48	3	11	25	156	1416	1
CUP9	84	459	308	851	1197	0	0	19	5	22	66	3	17	24	156	1417	0
PAM16	144	437	261	842	1206	0	0	33	17	23	34	3	12	34	156	1418	4
SHE10	156	359	259	774	1303	0	4	41	16	41	27	1	10	20	156	1419	3
LYS9	138	377	254	769	1313	6	2	53	21	29	28	2	4	19	156	1420	3
SPO12	119	394	238	751	1337	0	1	33	12	29	37	2	14	29	156	1421	0
NNT1	133	359	249	741	1354	3	0	27	13	28	36	1	10	41	156	1422	0
SYH1	139	327	219	685	1459	0	1	39	17	24	36	0	10	30	156	1423	2
PUF6	126	297	195	618	1592	3	1	29	16	21	25	0	9	56	156	1424	3
SAS10	106	254	169	529	1832	4	0	30	15	18	33	1	20	39	156	1425	4
HRK1	107	212	208	527	1839	0	0	36	15	33	43	1	16	12	156	1426	4
CPS1	56	123	74	253	3208	0	2	31	20	47	35	1	15	7	156	1427	5
TFS1	165	695	475	1335	823	2	2	32	17	17	58	3	25	3	155	1428	2
YPT6	138	505	312	955	1088	4	4	33	18	21	50	0	13	20	155	1429	0
CYC1	102	430	306	838	1216	1	0	24	18	25	42	1	17	28	155	1430	10
GIR2	145	375	249	769	1312	0	0	40	15	27	31	0	15	27	155	1431	0
DGK1	131	377	236	744	1349	4	0	33	18	26	31	3	11	33	155	1432	2
PBP4	85	301	172	558	1751	0	0	33	18	21	46	2	14	21	155	1433	1
CHZ1	95	541	365	1001	1038	2	2	24	8	16	52	2	14	38	154	1434	0
DYN2	145	454	350	949	1098	4	0	30	13	23	37	1	18	32	154	1435	0
DPP1	131	484	302	917	1139	0	0	41	20	28	33	3	14	15	154	1436	1
UGA1	111	406	261	778	1295	0	3	33	18	20	56	1	16	10	154	1437	0
UTR4	135	341	236	712	1409	2	0	16	10	19	45	6	26	32	154	1438	2
BDF1	123	313	227	663	1500	3	1	25	10	33	42	2	17	25	154	1439	5
VPS4	108	331	199	638	1553	0	0	36	10	36	44	0	11	17	154	1440	0
PMC1	127	288	212	627	1575	4	1	41	18	40	33	1	11	10	154	1441	3
YML018C	59	283	210	552	1771	1	1	35	19	27	35	0	10	28	154	1442	3
SAT4	77	168	94	339	2611	2	1	41	6	30	43	1	13	20	154	1443	6
LRO1	61	119	85	265	3116	3	2	17	10	61	30	1	8	27	154	1444	1
AIM41	182	837	562	1581	705	0	2	28	21	25	44	2	20	13	153	1445	1
TRM112	187	377	252	816	1246	0	1	33	14	23	22	2	7	52	153	1446	1
GAD1	157	387	228	772	1308	0	0	37	16	28	52	4	15	1	153	1447	0
APS1	118	344	200	662	1503	0	1	27	14	26	44	5	14	23	153	1448	0
GCD7	154	237	187	578	1697	2	3	42	22	42	20	3	4	20	153	1449	1
ZRT3	103	267	165	535	1807	0	2	42	17	21	43	1	11	18	153	1450	2
CDC11	76	227	183	486	1967	0	0	38	14	31	22	2	7	39	153	1451	1
TOM1	80	120	78	278	3014	1	0	33	15	41	30	0	6	28	153	1452	16
YMR31	78	466	268	812	1250	1	1	28	6	19	61	5	16	17	152	1453	1
CDC1	111	269	194	574	1705	2	0	41	10	25	47	3	9	17	152	1454	0
NUP116	81	162	109	352	2532	2	1	23	10	36	44	0	9	30	152	1455	5
YRB2	119	363	247	729	1372	0	0	34	10	28	38	1	14	26	151	1456	0
STO1	132	321	221	674	1477	1	1	40	22	35	30	0	10	14	151	1457	3
NOP12	114	341	219	674	1479	1	1	33	8	28	25	4	7	46	151	1458	0
PRM5	176	291	193	660	1507	0	0	57	16	27	22	1	10	18	151	1459	2
DBP9	120	303	218	641	1540	2	1	29	14	24	29	0	5	50	151	1460	7
MPP10	117	262	215	594	1653	9	0	25	14	36	21	2	8	45	151	1461	1
MAK11	114	277	202	593	1658	4	0	33	10	30	31	1	6	40	151	1462	1
BEM2	160	204	102	466	2024	4	1	45	20	36	23	1	8	18	151	1463	15
ELP2	87	178	112	377	2389	5	0	36	14	33	22	3	6	37	151	1464	5
CYC7	60	578	358	996	1044	0	0	12	10	8	90	6	23	1	150	1465	0
UBC9	177	365	268	810	1254	2	0	36	17	25	29	0	12	31	150	1466	2
RSM19	169	370	244	783	1286	0	1	44	14	30	35	1	10	16	150	1467	1
MDY2	161	378	244	783	1288	0	5	46	22	35	20	0	9	18	150	1468	0
MRPS9	105	397	278	780	1293	0	1	26	15	36	33	3	15	22	150	1469	3
GET2	148	335	254	737	1360	0	1	45	17	22	35	1	11	19	150	1470	0
PMU1	131	356	241	728	1374	4	3	43	18	24	36	4	5	20	150	1471	2
ALG6	129	339	209	677	1472	3	0	49	12	32	30	0	8	19	150	1472	3
MSS116	114	318	230	662	1504	2	0	44	7	34	40	2	4	19	150	1473	3
MAK21	108	264	154	526	1844	6	1	29	10	32	23	0	7	49	150	1474	12
YOR1	92	202	127	421	2185	3	5	34	21	30	29	0	13	23	150	1475	8
TUP1	103	183	115	401	2283	0	1	25	13	27	46	0	15	24	150	1476	3
SWS2	155	486	284	925	1130	0	2	35	17	23	38	1	13	22	149	1477	0
FIS1	93	444	310	847	1199	2	0	27	8	24	54	1	16	19	149	1478	1
TIM9	174	351	251	776	1298	2	1	47	27	30	27	0	7	11	149	1479	1
BCH1	112	377	266	755	1336	1	0	41	15	26	36	2	12	17	149	1480	4
TFG1	135	350	228	713	1405	2	1	40	13	23	43	3	10	17	149	1481	3
EDE1	102	292	205	599	1646	3	0	24	11	31	59	1	10	13	149	1482	6
SFA1	100	246	139	485	1968	4	1	31	14	26	29	3	11	35	149	1483	1
SSM4	102	136	99	337	2623	1	2	52	15	28	26	2	9	17	149	1484	6
UTP21	68	109	78	255	3191	6	0	23	10	22	29	3	7	55	149	1485	2
GGC1	105	797	451	1353	817	1	0	24	13	19	56	1	19	16	148	1486	2
ETR1	127	493	323	943	1107	1	1	35	12	35	49	0	12	5	148	1487	0
SPC2	137	398	276	811	1252	1	0	28	20	34	27	2	11	26	148	1488	0
WHI2	117	349	242	708	1418	1	4	34	20	23	37	0	12	22	148	1489	3
ERV2	66	338	203	607	1624	1	0	29	17	11	54	1	13	23	148	1490	0
NOP13	126	277	186	589	1668	0	0	39	15	33	14	0	5	42	148	1491	2
MRN1	73	184	139	396	2318	2	0	36	12	23	40	1	12	24	148	1492	3
TVP15	121	453	316	890	1167	0	0	37	18	32	30	2	8	20	147	1493	1
YDL012C	170	444	270	884	1170	0	0	33	24	23	33	1	12	21	147	1494	0
PDX1	170	440	266	876	1176	0	1	32	19	25	28	2	13	28	147	1495	0
ARD1	154	421	289	864	1185	1	1	37	22	29	19	0	6	34	147	1496	3
TAF10	121	391	210	722	1387	3	2	32	13	25	44	1	6	26	147	1497	0
YNR061C	134	317	200	651	1524	2	2	40	20	28	22	2	6	29	147	1498	1
TPN1	94	284	204	582	1688	2	1	30	12	30	38	2	8	27	147	1499	1
TSR4	113	245	184	542	1792	4	0	43	10	22	28	2	10	32	147	1500	2
GSH1	109	249	177	535	1806	1	0	33	16	37	35	1	17	8	147	1501	4
TDA3	70	214	133	417	2207	0	1	37	14	26	36	3	19	12	147	1502	1
RSM10	104	376	228	708	1419	1	0	18	16	23	48	6	17	18	146	1503	0
MTR2	146	349	195	690	1452	0	1	32	19	25	31	1	11	27	146	1504	1
DAD4	176	277	211	664	1497	4	2	31	20	14	34	3	18	26	146	1505	0
SDA1	130	253	137	520	1858	5	0	34	9	28	27	2	7	39	146	1506	3
IMP4	94	226	162	482	1976	4	1	31	10	24	23	1	5	52	146	1507	0
IKI3	93	200	178	471	2008	7	0	26	12	31	31	0	6	40	146	1508	3
ALG8	79	133	114	326	2699	3	1	49	9	40	27	0	10	11	146	1509	3
RPO21	95	122	79	296	2890	1	3	24	11	21	49	1	20	20	146	1510	42
CPR2	157	511	302	970	1072	1	0	40	14	22	33	1	8	27	145	1511	1
RPB3	155	402	267	824	1236	3	0	31	22	21	23	3	9	36	145	1512	3
YJL068C	122	405	265	792	1276	2	2	36	14	21	37	0	15	22	145	1513	0
PAM18	133	413	242	788	1279	1	1	34	22	22	22	1	4	40	145	1514	1
CAB1	126	328	203	657	1512	2	0	47	13	26	31	3	5	20	145	1515	1
NAB2	107	269	198	574	1706	1	0	22	10	24	29	2	21	37	145	1516	3
CMS1	131	242	181	554	1763	2	0	27	14	17	27	2	13	45	145	1517	0
MTR4	124	178	128	430	2145	11	0	44	7	23	22	0	6	43	145	1518	3
MSN4	59	375	292	726	1378	0	0	21	8	19	62	1	25	8	144	1519	0
DIG1	120	264	175	559	1744	0	0	29	13	31	33	1	11	26	144	1520	1
PRO1	117	233	178	528	1836	3	0	34	11	40	20	2	7	30	144	1521	2
ELP3	94	198	137	429	2148	4	2	30	15	26	17	1	9	46	144	1522	0
VAC8	71	219	119	409	2247	0	2	38	14	22	47	2	11	10	144	1523	6
INH1	86	894	482	1462	769	1	2	30	16	17	53	5	8	14	143	1524	0
MRP51	96	395	271	762	1324	2	1	27	15	29	35	1	10	26	143	1525	0
PLB2	85	355	244	684	1462	0	3	26	12	21	38	3	26	17	143	1526	2
NUP49	111	321	226	658	1511	3	1	35	12	39	17	2	7	31	143	1527	1
RTF1	102	303	224	629	1573	0	1	32	9	24	34	3	13	28	143	1528	2
RAS1	128	286	189	603	1634	0	0	35	21	24	19	0	4	40	143	1529	0
TRM1	126	207	119	452	2061	6	1	25	13	39	18	0	13	35	143	1530	1
SPP2	69	215	143	427	2158	1	0	18	13	12	46	2	16	36	143	1531	0
DAD1	153	468	335	956	1086	4	0	43	12	18	27	6	10	26	142	1532	0
MRP10	128	481	324	933	1119	1	0	27	15	16	42	0	16	26	142	1533	0
HAM1	161	414	244	819	1243	0	1	36	18	24	28	1	7	28	142	1534	0
SEH1	135	378	235	748	1343	5	0	30	14	28	38	2	6	24	142	1535	2
ISU2	174	300	238	712	1408	0	1	29	20	26	23	0	9	35	142	1536	0
GPA1	126	337	186	649	1527	1	2	34	10	36	27	0	5	30	142	1537	5
NCL1	134	292	194	620	1587	0	3	36	16	34	26	3	1	26	142	1538	3
YAP1	111	270	206	587	1676	2	0	41	25	32	20	1	4	19	142	1539	3
HAL5	155	226	182	563	1732	0	0	44	11	33	38	0	8	8	142	1540	1
HAP1	149	230	174	553	1768	3	1	33	16	36	18	2	10	27	142	1541	9
YTM1	138	231	136	505	1899	7	2	35	12	21	15	1	4	54	142	1542	5
SPC1	54	243	140	437	2122	1	1	38	17	18	33	2	14	20	142	1543	1
RET1	100	159	141	400	2290	5	0	47	14	30	27	0	3	21	142	1544	6
YCF1	114	160	113	387	2354	4	1	45	18	39	18	0	5	17	142	1545	6
HSP78	185	375	241	801	1264	1	2	47	18	34	27	0	11	4	141	1546	3
TVP38	103	348	268	719	1393	1	0	44	23	26	27	1	7	13	141	1547	1
TIM21	149	324	219	692	1451	0	0	40	14	34	19	2	6	26	141	1548	1
GCN3	133	315	225	673	1482	7	0	30	10	25	35	0	5	36	141	1549	0
GRX7	135	311	206	652	1521	0	1	41	19	26	31	0	4	20	141	1550	1
ALG5	106	312	192	610	1614	1	1	27	23	20	34	0	7	30	141	1551	3
PTK2	95	280	199	574	1708	0	0	23	12	22	54	2	21	7	141	1552	1
CDS1	89	284	189	562	1736	0	0	30	20	23	29	0	12	27	141	1553	3
MIM2	117	266	176	559	1745	0	1	29	20	35	26	1	8	22	141	1554	2
NOP4	94	264	173	531	1825	0	0	24	10	20	25	2	5	55	141	1555	2
CDC31	76	229	140	445	2087	0	3	16	12	18	50	4	15	26	141	1556	0
AVT7	120	497	327	944	1104	1	0	36	15	28	32	3	13	13	140	1557	1
DIA1	282	261	136	679	1470	0	0	47	17	48	19	0	3	6	140	1558	2
YOL057W	89	253	189	531	1826	4	1	42	16	21	39	1	7	14	140	1559	2
GPI11	106	267	147	520	1860	4	0	27	13	15	31	2	11	41	140	1560	0
PAR32	86	236	176	498	1922	0	0	31	4	22	40	1	16	26	140	1561	1
YNL134C	141	390	296	827	1231	1	1	47	13	37	28	1	6	7	139	1562	0
DAK1	137	378	242	757	1330	0	3	34	23	33	23	2	10	14	139	1563	2
HOT13	143	368	239	750	1340	1	1	29	11	18	48	1	13	19	139	1564	0
SPN1	114	366	268	748	1346	3	1	41	10	22	33	1	10	22	139	1565	3
EHT1	126	303	204	633	1563	0	2	51	20	16	26	2	5	19	139	1566	0
TSR2	132	310	190	632	1566	1	0	40	13	22	19	1	5	39	139	1567	2
KTR7	108	261	187	556	1756	2	1	35	11	29	29	1	9	25	139	1568	2
RRP1	125	246	173	544	1787	5	0	27	10	31	19	0	6	46	139	1569	0
RHO2	100	228	163	491	1945	0	0	29	4	19	48	1	10	28	139	1570	0
ALG9	77	184	131	392	2336	0	1	36	19	30	28	0	6	20	139	1571	1
CHC1	71	180	122	373	2418	2	1	32	18	35	30	1	14	9	139	1572	16
DHH1	23	108	87	218	3555	1	1	18	6	17	50	4	34	10	139	1573	4
THG1	188	533	354	1075	977	1	2	50	15	8	23	1	12	29	138	1574	1
DID4	122	524	337	983	1063	1	0	33	10	34	32	1	4	24	138	1575	1
CUB1	135	417	272	824	1238	2	0	39	10	23	39	1	17	9	138	1576	1
TIR1	71	429	271	771	1310	1	1	22	16	22	49	2	19	8	138	1577	1
MGR2	167	350	217	734	1369	3	2	36	14	26	26	4	4	28	138	1578	0
ANP1	166	335	223	724	1382	2	1	34	11	30	20	0	10	33	138	1579	4
SAM35	124	366	225	715	1400	1	0	41	19	26	19	2	4	27	138	1580	1
YIM1	82	338	220	640	1546	0	0	24	5	15	54	4	21	15	138	1581	0
RTG2	90	293	185	568	1725	0	0	26	10	33	32	1	7	29	138	1582	0
ERP4	98	239	165	502	1912	0	1	40	11	20	25	2	8	32	138	1583	3
ECM1	84	257	146	487	1961	6	1	18	13	14	29	2	7	55	138	1584	0
SHO1	109	186	166	461	2042	0	2	49	19	26	15	0	5	24	138	1585	0
PPT1	84	214	147	445	2084	8	0	40	19	27	11	1	4	36	138	1586	1
KAP104	118	187	136	441	2104	1	1	31	10	35	22	2	6	32	138	1587	5
RFC1	109	189	133	431	2141	2	1	32	10	30	34	1	8	23	138	1588	2
SUS1	180	481	340	1001	1035	4	0	29	16	25	38	5	8	16	137	1589	1
MRPL37	115	499	303	917	1140	5	2	34	16	18	43	0	7	19	137	1590	0
ERP5	139	400	285	824	1237	2	0	28	16	23	26	0	17	27	137	1591	2
RRP42	112	316	188	616	1599	0	0	26	6	19	26	1	11	48	137	1592	0
RME1	112	257	219	588	1672	1	2	37	11	20	41	2	7	19	137	1593	1
CHS7	127	267	160	554	1764	3	1	49	18	18	19	3	10	20	137	1594	1
AAP1	98	211	161	470	2009	4	0	42	16	37	7	0	3	32	137	1595	8
PPQ1	34	111	83	228	3452	0	0	22	11	20	44	1	19	20	137	1596	1
SSU1	57	428	309	794	1273	1	0	27	6	10	62	2	18	11	136	1597	2
APS2	95	361	245	701	1436	0	1	18	15	13	53	0	15	22	136	1598	0
TRP3	122	317	242	681	1465	4	1	43	14	27	27	1	1	23	136	1599	2
BET5	108	253	157	518	1864	0	0	23	13	21	41	1	11	26	136	1600	0
RPF1	91	229	166	486	1965	3	0	19	14	28	20	1	5	49	136	1601	4
JIP5	156	322	236	714	1401	0	1	32	18	30	18	1	6	30	135	1602	0
ARG7	78	366	236	680	1469	2	1	26	9	21	49	3	11	16	135	1603	1
GPI17	128	298	222	648	1529	0	0	32	12	25	18	2	12	34	135	1604	2
VPS70	118	295	206	619	1590	2	0	35	9	26	37	0	15	13	135	1605	0
FAP7	101	296	211	608	1619	1	1	35	22	15	24	1	5	33	135	1606	1
VPS29	97	308	203	608	1620	2	0	33	22	23	20	1	9	27	135	1607	2
RCR1	159	240	157	556	1754	0	0	38	16	24	36	3	12	6	135	1608	0
NAM7	97	267	192	556	1758	8	0	49	17	28	19	2	3	17	135	1609	3
SLY1	102	257	177	536	1805	2	0	44	14	21	27	2	5	22	135	1610	0
MRPL6	116	417	241	774	1306	5	1	42	12	22	31	0	12	15	134	1611	1
TUM1	119	317	211	647	1531	1	2	36	10	34	20	4	3	27	134	1612	3
NAB6	121	295	228	644	1535	0	4	40	13	35	18	1	7	20	134	1613	6
NCE103	127	306	198	631	1567	0	1	35	12	19	36	2	12	18	134	1614	0
BNA1	84	282	188	554	1767	0	2	38	15	31	22	1	12	15	134	1615	0
SND1	83	268	182	533	1814	0	2	24	5	21	46	3	19	16	134	1616	3
CST26	96	270	165	531	1823	2	1	35	13	22	35	1	10	18	134	1617	1
NOP14	108	218	148	474	1996	3	0	29	12	21	32	2	6	32	134	1618	1
UTP23	95	197	158	450	2069	2	0	30	8	19	13	1	5	58	134	1619	1
ORM1	87	219	144	450	2070	0	0	30	13	27	30	2	10	22	134	1620	4
SST2	103	199	128	430	2146	1	2	45	13	39	16	1	3	17	134	1621	2
NOB1	100	173	123	396	2313	6	0	31	14	28	19	1	8	33	134	1622	3
RRP4	93	140	97	330	2664	2	0	25	10	29	12	1	10	47	134	1623	0
YGR130C	124	469	321	914	1142	0	2	28	14	13	54	2	11	11	133	1624	2
ALT1	100	403	266	769	1314	0	1	23	15	14	48	1	11	21	133	1625	4
MIC26	114	383	249	746	1348	3	1	33	9	25	36	2	8	20	133	1626	3
MRPL33	101	376	242	719	1394	1	1	15	7	30	43	3	12	23	133	1627	1
SRP101	134	303	218	655	1515	1	1	29	14	34	24	1	7	24	133	1628	2
RFA2	120	292	214	626	1578	5	0	38	12	24	18	1	6	34	133	1629	1
SUR1	109	283	192	584	1683	0	2	35	17	23	34	1	10	13	133	1630	1
POP2	91	237	144	472	2004	2	0	20	11	12	53	2	14	21	133	1631	0
PHM8	130	590	377	1097	957	0	2	23	10	17	61	2	12	7	132	1632	0
MRPL50	146	480	308	934	1116	0	3	35	19	26	23	5	7	17	132	1633	0
YGK1	109	400	258	767	1316	8	1	34	13	24	18	3	14	26	132	1634	0
RSA3	142	379	229	750	1341	1	0	29	15	27	22	0	4	35	132	1635	0
KEI1	131	318	220	669	1493	0	0	25	20	20	23	2	9	33	132	1636	0
SNX3	122	286	186	594	1652	1	1	33	15	25	35	2	9	13	132	1637	2
SPT16	92	257	162	511	1883	5	1	23	15	35	25	1	13	20	132	1638	5
DOM34	88	244	151	483	1972	5	0	32	11	22	29	1	6	31	132	1639	1
RPC31	74	221	145	440	2110	0	0	15	6	18	21	1	24	47	132	1640	1
MRPL38	118	450	263	831	1226	0	0	27	10	15	47	0	21	11	131	1641	0
FAT1	102	427	286	815	1248	1	2	35	12	28	29	1	11	15	131	1642	2
PLB1	120	367	274	761	1325	0	1	39	15	19	37	0	10	11	131	1643	2
YBT1	156	240	182	578	1696	4	0	49	13	33	13	1	9	13	131	1644	13
MUD1	92	235	176	503	1909	2	0	23	14	14	40	2	22	16	131	1645	0
NAN1	125	207	134	466	2025	6	1	35	9	21	18	4	3	41	131	1646	11
VPS45	80	186	126	392	2334	0	0	28	7	40	31	0	4	21	131	1647	1
MRX14	156	509	334	999	1041	3	0	23	19	27	33	4	7	17	130	1648	0
YBR137W	124	339	244	707	1421	3	2	31	14	24	38	1	8	14	130	1649	0
RHO5	149	339	217	705	1425	0	0	17	14	27	38	1	16	17	130	1650	0
ENT1	110	287	242	639	1550	0	1	17	10	22	33	1	24	23	130	1651	0
SMF3	84	202	146	432	2135	0	0	34	11	26	32	2	15	10	130	1652	1
FIT3	157	95	73	325	2707	0	1	50	15	26	20	0	8	11	130	1653	3
NRP1	51	94	75	220	3532	2	1	29	16	25	17	1	11	31	130	1654	6
YKE2	160	558	352	1070	981	0	0	29	10	14	35	3	9	29	129	1655	0
YIP4	159	502	350	1011	1024	4	3	33	22	18	23	1	10	22	129	1656	3
LDB7	155	412	287	854	1194	7	0	31	14	27	23	2	9	23	129	1657	1
ENT3	126	408	298	832	1223	2	1	26	9	29	36	0	7	22	129	1658	3
MRPL23	125	441	266	832	1224	0	2	31	14	29	30	0	13	12	129	1659	1
ARP9	134	397	251	782	1290	1	0	27	18	27	33	1	8	15	129	1660	0
TML25	100	355	231	686	1458	0	1	34	16	35	16	2	7	19	129	1661	0
HFD1	86	358	217	661	1506	0	2	22	9	25	32	4	22	15	129	1662	0
MRPL13	129	301	199	629	1572	1	0	31	15	26	20	3	12	22	129	1663	0
TAN1	106	310	191	607	1623	0	1	33	14	24	25	2	3	28	129	1664	0
MEX67	102	212	150	464	2031	0	1	20	10	27	32	0	7	33	129	1665	2
CYC8	112	195	134	441	2105	0	1	23	10	23	42	3	11	17	129	1666	10
SFK1	135	164	102	401	2282	0	0	43	16	26	21	0	7	16	129	1667	1
VIP1	75	197	127	399	2299	1	1	25	8	28	41	1	11	15	129	1668	5
RAD27	66	136	105	307	2818	1	0	24	4	27	28	1	7	38	129	1669	1
OPI3	138	545	387	1070	982	0	0	38	20	27	24	1	8	10	128	1670	1
DDP1	99	438	306	843	1205	1	1	30	11	15	48	2	9	13	128	1671	1
YER134C	130	436	273	839	1210	0	2	35	12	29	29	2	9	12	128	1672	1
MRPL9	136	355	247	738	1357	2	1	25	11	21	36	0	6	29	128	1673	1
URA8	109	287	216	612	1604	1	0	29	11	16	45	1	13	13	128	1674	3
YJR142W	77	312	221	610	1616	1	0	26	19	19	35	2	9	18	128	1675	1
NUP2	144	249	176	569	1719	1	0	27	13	30	18	1	5	34	128	1676	1
MIC12	86	294	187	567	1727	0	0	26	15	23	34	3	11	16	128	1677	1
APL5	124	233	140	497	1924	1	1	39	7	24	26	1	10	21	128	1678	1
IRC7	68	234	141	443	2096	2	0	31	13	17	30	1	6	30	128	1679	4
ERB1	103	161	109	373	2412	0	0	37	13	29	12	0	2	35	128	1680	2
BMS1	76	158	103	337	2624	3	0	25	5	27	29	0	8	34	128	1681	8
HRT1	87	383	265	735	1368	2	2	21	10	28	31	2	14	21	127	1682	0
SEC18	137	337	221	695	1447	0	0	31	13	26	31	0	8	18	127	1683	2
RAM2	121	350	201	672	1486	1	0	40	15	12	27	1	6	26	127	1684	2
APE4	87	380	201	668	1495	2	1	23	16	17	50	1	7	13	127	1685	2
SME1	93	317	230	640	1545	2	1	20	14	17	41	1	9	25	127	1686	1
PAM1	129	258	228	615	1601	1	1	26	18	23	33	0	18	9	127	1687	3
RRP15	96	308	205	609	1618	3	0	19	10	14	28	0	8	48	127	1688	1
CMC1	117	293	184	594	1654	2	0	41	16	17	31	1	4	17	127	1689	0
APM4	90	306	194	590	1665	0	1	36	7	19	38	2	10	15	127	1690	3
GNT1	128	253	200	581	1689	1	0	29	13	34	23	0	5	23	127	1691	3
ENB1	138	213	167	518	1863	0	0	53	12	36	16	0	1	9	127	1692	4
CDC36	98	276	137	511	1882	1	1	26	14	16	34	1	7	29	127	1693	1
NET1	99	163	118	380	2379	0	0	34	11	26	28	0	9	19	127	1694	6
DNF2	103	145	123	371	2427	1	0	40	20	38	14	0	8	7	127	1695	5
HGH1	70	170	111	351	2544	3	0	22	6	22	23	0	7	47	127	1696	0
TDA1	61	136	78	275	3037	1	0	29	17	17	50	1	8	5	127	1697	3
TMH18	107	594	388	1089	966	1	1	26	9	16	44	3	12	16	126	1698	1
RAD6	151	478	287	916	1141	2	1	25	10	18	32	3	8	30	126	1699	1
BNA6	123	363	250	736	1364	1	0	29	17	32	19	2	6	21	126	1700	1
SRP102	147	367	221	735	1366	6	0	32	14	18	30	0	4	28	126	1701	0
ECT1	140	360	217	717	1397	0	0	33	14	24	34	1	6	14	126	1702	2
MIC27	131	348	235	714	1402	1	2	30	10	19	36	1	8	22	126	1703	0
FCF2	83	321	201	605	1631	0	2	22	9	12	35	1	11	36	126	1704	1
EFR3	108	251	200	559	1746	3	1	28	13	29	27	0	7	22	126	1705	1
RPD3	94	251	167	512	1881	0	1	24	7	25	31	1	11	27	126	1706	1
GCR1	114	211	165	490	1947	0	0	29	21	34	22	1	6	13	126	1707	4
EFM4	83	236	160	479	1980	1	0	23	9	28	27	2	6	31	126	1708	1
PHM6	15	250	175	440	2112	1	0	6	2	9	61	3	23	22	126	1709	0
CAN1	89	199	134	422	2177	0	1	31	5	15	35	1	7	32	126	1710	2
LIP5	63	193	137	393	2332	0	0	17	11	19	29	3	12	35	126	1711	1
URB1	79	84	44	207	3663	2	0	33	12	33	19	0	3	26	126	1712	5
COA3	116	556	339	1011	1026	1	3	35	12	16	32	3	11	16	125	1713	1
RCN2	196	303	196	695	1446	0	0	34	27	31	15	1	11	6	125	1714	2
TPS3	112	343	223	678	1471	0	2	25	9	26	50	1	5	9	125	1715	1
CNL1	117	338	219	674	1478	1	0	28	12	27	30	0	11	17	125	1716	1
SFH5	135	304	193	632	1565	0	0	34	16	24	22	1	6	22	125	1717	0
RFC2	78	255	195	528	1837	3	0	25	9	23	28	2	15	23	125	1718	1
DCP2	123	219	171	513	1875	1	1	33	19	31	16	2	0	24	125	1719	4
RRP3	93	222	153	468	2015	3	0	26	11	35	14	0	5	34	125	1720	0
NSA1	88	237	137	462	2039	2	1	22	17	29	10	1	4	42	125	1721	0
SPE1	54	254	128	436	2124	1	0	36	18	31	10	0	12	18	125	1722	3
SVL3	84	217	132	433	2132	0	0	29	8	19	39	4	12	14	125	1723	4
ICE2	86	217	109	412	2232	1	0	39	13	22	27	5	4	15	125	1724	0
FTH1	94	194	107	395	2322	2	0	34	11	33	24	3	7	13	125	1725	2
UTP15	65	171	140	376	2398	5	0	20	11	14	26	0	10	44	125	1726	3
RRP12	75	146	111	332	2651	0	1	27	4	20	16	2	8	48	125	1727	7
FAR1	51	146	113	310	2801	5	0	32	14	39	23	3	7	7	125	1728	8
LAP3	108	463	300	871	1182	0	0	38	11	26	26	1	8	14	124	1729	3
VPS60	110	392	272	774	1307	0	0	26	9	29	26	2	12	20	124	1730	0
VMA22	110	350	214	674	1480	1	2	26	12	15	38	4	9	20	124	1731	1
BXI1	105	335	201	641	1541	0	0	44	15	24	25	1	5	10	124	1732	1
TFB5	103	286	160	549	1775	2	1	21	13	23	38	1	10	18	124	1733	2
NUS1	100	280	169	549	1776	1	1	34	17	28	22	1	6	16	124	1734	1
FLC2	119	263	166	548	1777	0	0	36	10	30	29	1	8	10	124	1735	3
VPH2	100	251	180	531	1822	0	1	40	15	22	23	1	6	17	124	1736	0
DLD2	96	260	175	531	1824	1	0	30	14	19	30	0	11	20	124	1737	0
SPT6	116	255	155	526	1843	1	2	37	10	29	24	1	10	13	124	1738	6
FET4	91	532	336	959	1083	1	2	28	16	24	26	2	11	16	123	1739	3
CIR1	148	419	297	864	1186	0	1	29	17	21	35	2	7	12	123	1740	0
MIM1	109	441	286	836	1217	1	1	28	15	19	24	2	11	24	123	1741	0
MNN1	102	379	279	760	1327	2	4	31	11	18	36	0	7	20	123	1742	3
MRPS16	115	373	223	711	1412	0	2	29	10	15	32	2	11	24	123	1743	0
RTT102	96	362	223	681	1466	0	2	24	6	13	30	0	20	30	123	1744	0
YGL242C	109	337	208	654	1520	1	1	20	13	21	36	2	13	18	123	1745	1
ROX3	114	290	226	630	1569	1	0	24	10	19	28	1	13	28	123	1746	2
PTC2	109	295	221	625	1582	0	1	40	12	18	23	0	9	21	123	1747	4
TFG2	70	316	212	598	1647	0	0	25	10	11	43	2	11	21	123	1748	1
GNA1	131	293	160	584	1682	2	0	37	10	23	31	1	4	17	123	1749	1
CCC1	65	261	153	479	1983	1	1	39	11	21	30	1	8	13	123	1750	0
PHO91	123	208	135	466	2026	0	0	41	9	23	25	1	5	19	123	1751	4
NUP120	75	210	139	424	2169	4	0	32	16	20	23	2	8	22	123	1752	3
NMA1	95	184	136	415	2214	0	1	34	13	20	23	0	9	24	123	1753	2
TSR1	99	181	126	406	2254	8	0	31	16	19	20	0	7	30	123	1754	1
DSE4	85	182	129	396	2315	4	1	20	12	23	39	2	9	18	123	1755	9
NUP188	99	178	112	389	2346	2	1	33	14	18	28	1	8	21	123	1756	11
TMS1	84	176	114	374	2404	5	2	38	9	17	31	1	9	18	123	1757	0
PFF1	71	110	68	249	3257	1	0	25	21	34	20	0	7	16	123	1758	0
APE2	141	365	230	736	1362	4	2	18	17	38	27	0	8	14	122	1759	5
SIC1	117	289	201	607	1621	1	0	30	16	19	28	2	9	18	122	1760	0
UTP11	80	270	151	501	1914	5	1	31	8	18	21	2	5	37	122	1761	1
SIT4	106	232	154	492	1940	0	0	27	10	27	23	2	10	23	122	1762	0
TAH1	93	240	148	481	1977	2	1	26	12	23	23	2	9	27	122	1763	0
DPH2	103	156	105	364	2464	2	0	31	11	12	13	2	8	45	122	1764	3
YIH1	70	156	114	340	2600	2	0	23	14	26	23	1	6	29	122	1765	0
GRE2	94	149	76	319	2748	0	0	24	5	38	23	2	6	24	122	1766	0
YMC2	61	146	110	317	2761	1	0	12	10	14	38	1	8	39	122	1767	1
ATG42	121	393	234	748	1345	0	1	29	14	29	35	2	9	3	121	1768	2
HLJ1	111	324	245	680	1467	0	0	29	13	25	21	3	9	21	121	1769	0
ERG8	122	311	185	618	1593	2	0	42	12	24	18	1	3	21	121	1770	0
YOR131C	72	311	203	586	1680	2	0	25	10	20	33	2	15	16	121	1771	0
DST1	126	254	186	566	1729	0	0	43	10	33	12	0	6	17	121	1772	2
RPA14	105	270	167	542	1793	0	0	28	14	16	21	0	8	34	121	1773	5
EMI1	97	256	176	529	1834	0	0	38	18	24	25	1	9	6	121	1774	1
POP8	113	250	147	510	1885	3	0	31	8	30	25	1	8	18	121	1775	0
NHX1	101	258	145	504	1905	0	1	25	12	27	34	2	11	10	121	1776	1
NFS1	89	180	145	414	2220	3	0	30	9	24	32	0	15	11	121	1777	3
DLS1	75	201	106	382	2374	0	1	13	15	17	33	1	10	32	121	1778	0
KEL3	81	138	90	309	2805	3	1	34	10	20	20	0	9	28	121	1779	2
MDL1	68	145	89	302	2853	5	1	26	13	39	17	1	3	22	121	1780	0
AQR1	37	79	55	171	4014	11	0	17	6	11	5	0	4	78	121	1781	4
SNA2	17	76	69	162	4111	0	3	34	17	13	34	3	6	14	121	1782	0
YBL029C-A	177	341	187	705	1424	1	0	29	20	25	24	0	10	12	120	1783	0
TIM44	119	347	237	703	1429	2	1	26	18	26	24	1	6	19	120	1784	1
NMT1	129	329	201	659	1509	3	2	25	10	25	23	1	6	30	120	1785	1
PGC1	123	323	193	639	1548	0	0	22	9	19	37	4	8	21	120	1786	2
ERJ5	103	303	182	588	1674	2	0	32	9	20	31	0	8	20	120	1787	1
PBN1	89	277	193	559	1749	0	0	24	12	17	32	1	14	20	120	1788	0
DIB1	98	290	166	554	1766	1	0	26	17	16	32	2	8	19	120	1789	0
ERG12	113	245	183	541	1795	2	2	28	15	28	11	2	11	25	120	1790	2
GUP1	113	228	149	490	1948	1	2	36	13	30	22	1	4	14	120	1791	1
UTP8	105	204	158	467	2019	0	0	35	14	21	14	1	7	28	120	1792	2
YEH2	96	201	125	422	2176	1	3	33	8	31	21	0	6	21	120	1793	2
ANY1	55	219	143	417	2208	2	1	30	17	22	24	1	6	20	120	1794	5
SAP155	98	167	132	397	2310	0	2	30	15	25	16	1	12	21	120	1795	5
COS2	83	156	115	354	2520	1	0	28	22	30	23	1	11	5	120	1796	1
YPI1	109	464	290	863	1188	0	0	27	13	21	40	0	13	5	119	1797	0
SDS24	118	383	243	744	1350	0	2	34	10	16	40	1	17	1	119	1798	1
SFT1	155	316	235	706	1422	2	1	29	11	18	25	2	9	25	119	1799	2
MRP7	109	340	231	680	1468	1	0	33	7	26	36	0	6	11	119	1800	1
HST2	135	296	191	622	1584	1	2	31	19	23	21	0	6	19	119	1801	1
PRS2	100	300	217	617	1596	1	0	26	11	22	29	3	6	22	119	1802	0
PCS60	110	304	193	607	1622	0	2	22	14	16	35	2	11	19	119	1803	1
CLB1	91	289	212	592	1660	2	0	22	14	17	32	2	11	21	119	1804	4
MSN5	72	252	206	530	1831	1	2	22	12	28	28	2	13	14	119	1805	3
TLG1	95	264	168	527	1840	4	0	23	15	11	39	2	14	15	119	1806	2
DET1	80	237	145	462	2040	1	0	31	7	23	23	2	3	30	119	1807	1
YML108W	109	197	143	449	2074	0	3	28	15	20	16	0	9	31	119	1808	0
BUD16	45	129	90	264	3128	2	0	25	11	25	18	0	7	33	119	1809	1
PDR12	52	71	51	174	3981	1	1	33	15	32	23	1	8	7	119	1810	10
GCV1	80	493	333	906	1147	2	1	36	11	16	37	0	8	10	118	1811	2
YJR096W	98	443	284	825	1235	0	1	31	14	20	39	0	7	7	118	1812	0
BOL1	138	385	266	789	1278	0	3	34	16	12	27	2	9	18	118	1813	0
MRPL36	103	406	263	772	1309	1	1	19	24	13	27	1	8	26	118	1814	2
TRP1	110	385	207	702	1432	3	0	33	15	19	23	1	5	22	118	1815	0
YFH1	131	333	220	684	1461	0	0	29	10	29	19	2	12	17	118	1816	0
SKI6	112	302	207	621	1585	0	1	23	17	26	16	1	7	28	118	1817	3
NSP1	155	268	176	599	1642	0	1	30	12	30	19	0	7	20	118	1818	2
SEY1	106	286	186	578	1700	1	1	29	13	15	24	3	11	23	118	1819	2
SMD3	82	269	220	571	1716	0	0	15	5	14	49	2	12	21	118	1820	0
BUD21	89	287	172	548	1778	1	0	12	12	17	25	2	8	42	118	1821	3
PUS1	84	216	151	451	2067	2	0	23	14	25	22	0	11	23	118	1822	0
DID2	125	515	327	967	1076	1	0	17	9	17	38	0	20	16	117	1823	1
SUB1	109	420	269	798	1269	0	1	24	12	18	28	2	14	19	117	1824	0
OCH1	99	366	238	703	1430	0	0	21	15	32	29	1	6	13	117	1825	3
CUE5	128	330	237	695	1448	0	1	28	21	28	24	2	2	12	117	1826	2
MLC2	101	351	208	660	1508	0	0	19	13	13	33	1	14	24	117	1827	0
CIT2	185	247	127	559	1743	1	0	42	10	26	22	1	9	7	117	1828	7
KTI12	104	244	159	507	1894	0	1	41	16	17	17	1	4	21	117	1829	0
MAK3	90	262	135	487	1960	1	1	19	6	15	37	0	10	30	117	1830	0
SNR33	93	215	152	460	2045	204	9	30	13	10	24	6	7	27	117	1831	100
EFM1	79	190	126	395	2323	0	2	38	10	23	19	1	3	23	117	1832	0
LCB3	89	162	108	359	2487	5	2	23	11	31	19	0	13	20	117	1833	0
JSN1	86	148	109	343	2582	0	0	28	12	27	32	0	14	4	117	1834	0
MCH4	49	92	75	216	3573	0	0	17	7	21	51	1	8	12	117	1835	3
ERP6	106	397	254	757	1332	0	0	34	11	23	22	2	7	17	116	1836	0
SDO1	119	326	207	652	1522	2	0	29	17	21	18	1	2	28	116	1837	1
NVJ2	109	311	207	627	1576	1	1	28	7	22	31	0	9	19	116	1838	6
TGL1	90	294	212	596	1649	1	0	27	9	24	35	1	9	11	116	1839	0
EFG1	94	279	165	538	1800	6	1	24	8	9	27	1	10	37	116	1840	0
LHS1	111	246	167	524	1850	0	1	35	12	26	21	1	6	15	116	1841	1
DDR2	86	218	206	510	1886	0	2	30	16	14	43	2	11	0	116	1842	0
HOL1	95	255	149	499	1917	3	0	38	9	39	13	1	2	14	116	1843	2
FAU1	109	226	153	488	1953	3	1	22	6	20	22	1	6	39	116	1844	1
SCJ1	127	229	131	487	1959	4	0	30	12	11	27	0	5	31	116	1845	1
TAF12	94	224	168	486	1964	0	0	31	8	28	22	3	8	16	116	1846	0
RSR1	76	225	136	437	2120	4	0	26	14	18	20	2	6	30	116	1847	1
HEM1	66	181	129	376	2397	0	0	27	22	28	16	1	7	15	116	1848	2
NHA1	78	166	117	361	2475	1	1	31	8	26	24	0	15	12	116	1849	2
SPB1	69	162	109	340	2602	1	0	14	6	15	27	1	7	46	116	1850	4
STV1	63	179	81	323	2720	3	0	30	12	20	31	0	12	11	116	1851	4
REA1	90	86	71	247	3276	2	0	24	7	23	22	3	9	28	116	1852	74
PSP2	17	39	37	93	4714	0	0	21	7	17	44	0	15	12	116	1853	1
VTI1	99	465	281	845	1201	0	0	22	9	23	37	1	7	16	115	1854	1
NAS6	86	463	247	796	1271	5	0	34	9	23	28	0	10	11	115	1855	2
PLP2	114	402	227	743	1352	1	1	28	11	21	26	0	6	23	115	1856	0
MRPL20	106	382	255	743	1353	2	0	33	10	17	34	2	4	15	115	1857	4
RBK1	97	353	220	670	1492	0	0	30	14	21	22	0	12	16	115	1858	1
DCS1	96	303	242	641	1542	1	0	31	13	24	29	1	12	5	115	1859	2
YLR363W-A	100	330	208	638	1554	0	1	25	5	10	25	1	7	42	115	1860	0
SYS1	96	328	195	619	1591	0	1	31	15	21	22	4	5	17	115	1861	0
IES6	107	258	226	591	1661	5	0	23	9	13	22	2	17	29	115	1862	0
TSC10	99	264	177	540	1797	0	0	24	5	26	29	1	3	27	115	1863	0
SHE3	83	225	170	478	1985	0	0	38	12	22	12	0	4	27	115	1864	1
RIM11	94	210	170	474	1998	1	0	32	10	20	25	2	13	13	115	1865	0
WSC2	117	203	135	455	2055	0	0	36	9	21	26	2	3	18	115	1866	1
MNT2	116	173	140	429	2147	3	0	35	17	24	14	0	3	22	115	1867	0
ALG7	90	190	148	428	2154	1	0	38	12	21	20	0	4	20	115	1868	1
KRI1	77	210	131	418	2201	1	0	8	6	16	40	0	9	36	115	1869	0
PPS1	90	200	113	403	2269	3	3	31	10	31	22	0	6	15	115	1870	5
APP1	85	168	120	373	2415	0	0	24	9	22	32	3	9	16	115	1871	2
MNR2	58	176	135	369	2443	1	0	33	11	13	35	0	17	6	115	1872	4
ERG7	81	153	99	333	2646	1	0	30	12	29	16	0	6	22	115	1873	2
UFD4	75	143	110	328	2680	2	0	33	11	19	26	3	5	18	115	1874	3
UTP25	59	110	100	269	3091	0	1	18	9	12	14	0	6	56	115	1875	2
EAF3	116	404	267	787	1283	1	0	30	18	21	19	1	6	19	114	1876	2
OM45	71	399	268	738	1358	0	1	13	5	13	59	1	16	7	114	1877	0
COA1	109	355	236	700	1438	1	0	31	14	15	29	1	8	16	114	1878	0
PDE2	89	265	180	534	1809	5	2	21	9	18	26	3	12	25	114	1879	2
GIC2	110	229	156	495	1930	0	1	17	6	15	32	3	15	26	114	1880	0
ISA1	72	273	147	492	1944	0	1	20	5	10	44	4	10	21	114	1881	0
NAT2	81	234	144	459	2047	1	2	32	10	17	24	1	6	24	114	1882	2
MIT1	147	172	112	431	2140	0	1	39	10	23	19	2	6	15	114	1883	1
TAF6	97	175	144	416	2209	0	2	35	8	18	20	0	7	26	114	1884	2
HMG1	108	171	124	403	2268	1	0	33	15	15	24	2	5	20	114	1885	5
RQC2	91	177	105	373	2414	1	1	25	6	34	21	1	10	17	114	1886	5
VBA1	65	138	83	286	2959	0	0	37	11	24	21	1	6	14	114	1887	0
RSP5	32	87	82	201	3722	0	0	26	13	23	32	4	10	6	114	1888	7
RTC6	108	322	240	670	1491	0	0	25	13	17	33	3	10	12	113	1889	2
AIM2	93	342	217	652	1523	0	0	34	8	23	28	0	6	14	113	1890	1
CSI2	83	316	212	611	1610	0	1	30	10	18	23	2	9	21	113	1891	2
EXG2	137	274	176	587	1675	0	1	30	7	28	22	0	5	21	113	1892	1
CSC1	102	264	163	529	1833	1	1	32	15	21	29	1	5	10	113	1893	1
GAT2	69	260	188	517	1866	0	1	17	9	10	39	3	27	8	113	1894	0
REH1	106	239	168	513	1876	5	1	29	13	21	20	1	8	21	113	1895	0
UBX2	105	229	160	494	1932	0	0	40	11	20	9	1	5	27	113	1896	1
GCD2	104	217	152	473	2002	2	0	30	16	17	18	0	3	29	113	1897	4
GAA1	101	201	146	448	2077	4	1	30	8	31	20	1	8	15	113	1898	2
BIM1	96	211	110	417	2204	3	0	32	8	7	23	2	16	25	113	1899	0
KSP1	75	189	110	374	2406	1	0	18	17	31	22	2	5	18	113	1900	6
DUS3	67	136	86	289	2938	0	0	22	18	27	9	0	3	34	113	1901	7
BOS1	102	290	213	605	1630	2	0	26	15	27	20	1	8	15	112	1902	1
QRI1	82	299	208	589	1670	0	0	30	16	15	26	2	11	12	112	1903	0
YME1	107	299	181	587	1677	0	0	36	13	24	17	2	9	11	112	1904	6
RSM26	101	286	189	576	1703	0	1	25	13	15	33	1	6	19	112	1905	0
STE14	98	283	187	568	1724	2	1	31	16	21	20	2	4	18	112	1906	0
YPS7	159	241	162	562	1735	1	1	37	9	22	18	2	7	17	112	1907	2
PRS4	108	273	178	559	1747	2	1	34	6	21	15	2	4	30	112	1908	1
PRM7	79	254	181	514	1873	0	1	16	3	12	32	5	17	27	112	1909	3
NDC1	100	216	187	503	1908	0	1	38	16	27	15	0	2	14	112	1910	0
MRP1	81	234	173	488	1957	4	1	24	8	16	32	2	9	21	112	1911	1
GLE2	77	242	151	470	2011	2	1	29	11	18	25	0	9	20	112	1912	2
RAI1	91	202	133	426	2159	3	1	21	6	14	22	0	10	39	112	1913	1
UBP1	77	194	151	422	2181	0	1	24	9	21	19	0	9	30	112	1914	1
MIG1	69	208	142	419	2199	0	0	17	4	12	39	0	10	30	112	1915	1
COS1	63	203	131	397	2312	0	1	28	11	15	34	1	17	6	112	1916	0
SEC31	108	153	109	370	2435	0	1	21	7	18	30	1	9	26	112	1917	5
SEC7	79	156	118	353	2524	5	1	34	7	21	24	1	5	20	112	1918	9
PHO90	93	133	103	329	2671	2	1	49	4	22	14	0	3	20	112	1919	2
VPS62	49	140	75	264	3126	1	0	15	8	16	41	1	14	17	112	1920	1
SNC1	104	360	238	702	1433	0	1	25	17	13	32	5	5	14	111	1921	0
GPI15	112	341	202	655	1516	7	0	25	15	22	21	4	5	19	111	1922	0
YRA2	95	274	158	527	1841	1	1	21	13	13	34	2	9	19	111	1923	0
RRP43	81	274	158	513	1879	4	2	28	8	21	19	1	6	28	111	1924	0
YPP1	102	226	169	497	1926	0	1	34	11	30	17	0	1	18	111	1925	3
TAF4	105	185	148	438	2116	0	0	24	6	25	22	1	7	26	111	1926	1
PPH22	59	196	135	390	2344	0	0	20	12	20	24	3	19	13	111	1927	1
CTR9	45	206	121	372	2426	4	0	11	11	23	34	0	19	13	111	1928	2
UTP14	76	170	120	366	2455	0	1	18	4	19	17	0	9	44	111	1929	3
SFG1	91	154	99	344	2575	0	2	24	7	21	28	1	5	25	111	1930	1
LEM3	47	182	111	340	2607	4	0	28	12	21	23	1	10	16	111	1931	0
TRM11	66	91	56	213	3599	5	0	17	10	16	15	2	6	45	111	1932	1
NOP53	98	289	219	606	1627	3	1	22	8	23	12	0	9	36	110	1933	0
DSD1	121	283	195	599	1644	1	1	27	20	16	24	1	10	12	110	1934	0
VHR2	91	288	214	593	1659	0	0	15	9	17	32	0	8	29	110	1935	2
HSK3	100	266	164	530	1830	3	0	12	14	25	27	2	15	15	110	1936	1
CLN2	108	237	169	514	1872	0	1	32	12	24	17	0	5	20	110	1937	2
ALG11	86	261	164	511	1884	1	1	35	11	21	24	0	2	17	110	1938	2
ALR1	70	190	156	416	2211	0	0	32	12	21	22	0	3	20	110	1939	1
UBX7	85	198	117	400	2291	1	0	19	15	22	19	3	15	17	110	1940	0
MTM1	87	187	125	399	2297	2	0	33	12	15	21	1	8	20	110	1941	2
SIN3	66	123	83	272	3062	1	0	27	7	24	30	2	16	4	110	1942	5
MGM101	145	462	313	920	1136	7	1	20	12	15	26	1	11	24	109	1943	1
OCA2	121	359	246	726	1377	0	0	25	18	24	17	2	7	16	109	1944	2
SMX3	98	292	166	556	1757	0	0	20	17	8	33	0	8	23	109	1945	0
COQ6	80	285	190	555	1762	0	1	29	5	20	30	0	14	11	109	1946	2
AFG1	90	283	173	546	1783	2	1	21	14	15	23	0	10	26	109	1947	3
MRPL19	80	236	177	493	1937	0	0	26	10	20	26	1	7	19	109	1948	1
KEX2	90	205	116	411	2239	0	2	28	9	19	26	1	6	20	109	1949	6
ARE2	63	179	117	359	2492	0	0	27	4	10	45	1	13	9	109	1950	2
GCD10	93	153	100	346	2565	7	1	23	12	26	9	0	5	34	109	1951	0
MAK31	132	408	242	782	1291	4	0	33	11	20	16	2	13	13	108	1952	0
NPA3	141	335	256	732	1371	5	1	19	20	25	7	0	6	31	108	1953	0
CPR8	97	328	205	630	1571	0	1	31	14	23	16	0	9	15	108	1954	0
PEX2	118	268	179	565	1730	1	1	24	15	16	27	1	7	18	108	1955	1
LOA1	125	273	166	564	1731	0	0	25	13	20	26	0	5	19	108	1956	0
TRM8	134	253	147	534	1808	0	0	28	13	20	13	1	3	30	108	1957	0
APM3	95	265	173	533	1812	1	1	27	14	32	17	0	2	16	108	1958	1
GAL80	110	248	165	523	1852	1	0	23	6	18	33	0	6	22	108	1959	2
YAK1	142	210	163	515	1869	0	0	26	22	21	29	0	5	5	108	1960	2
ASI1	64	261	163	488	1958	0	0	31	11	14	25	0	15	12	108	1961	2
COA6	81	246	150	477	1989	0	1	22	7	18	37	2	10	12	108	1962	0
CSR1	108	214	153	475	1993	1	0	22	8	18	39	2	6	13	108	1963	3
RRP8	88	233	151	472	2005	0	1	24	8	14	21	0	7	34	108	1964	2
HBS1	97	230	131	458	2049	0	0	38	10	21	19	1	4	15	108	1965	0
YVH1	91	191	117	399	2295	1	0	18	14	19	10	1	4	42	108	1966	1
SEC9	60	198	141	399	2301	0	1	23	10	19	30	1	12	13	108	1967	1
SNR63	51	170	102	323	2722	21	18	8	7	9	28	5	24	27	108	1968	721
RAT1	73	141	107	321	2729	1	0	36	4	28	13	1	4	22	108	1969	3
LST4	47	120	89	256	3188	1	0	30	8	24	27	2	8	9	108	1970	6
HSP12	93	704	425	1222	884	1	0	8	5	11	44	1	11	27	107	1971	0
FPY1	132	481	297	910	1145	4	1	35	16	17	23	0	7	9	107	1972	1
TOM71	130	305	219	654	1519	1	0	25	10	20	21	1	10	20	107	1973	3
NPL6	111	278	241	630	1570	2	1	28	12	19	23	1	5	19	107	1974	0
TOA1	91	324	202	617	1597	1	0	22	11	11	27	1	11	24	107	1975	0
NDI1	107	291	199	597	1648	0	1	24	7	14	38	5	10	9	107	1976	1
BUG1	85	283	212	580	1695	0	2	26	8	20	27	4	9	13	107	1977	0
MPD2	130	282	161	573	1709	2	0	29	15	28	13	1	7	14	107	1978	1
SSD1	105	250	187	542	1794	1	1	18	17	23	28	1	13	7	107	1979	11
VPS35	87	243	192	522	1854	1	0	22	8	36	15	1	6	19	107	1980	4
ALG1	97	250	173	520	1861	2	1	31	8	21	27	0	10	10	107	1981	2
BUD32	81	277	147	505	1900	1	0	21	16	13	23	0	10	24	107	1982	1
STS1	96	243	161	500	1916	2	0	45	8	22	13	1	1	17	107	1983	3
PIM1	105	209	160	474	1997	0	0	27	10	23	17	1	9	20	107	1984	7
UBP10	99	158	98	355	2512	1	1	16	7	15	16	2	12	39	107	1985	7
TPO5	98	140	92	330	2663	1	0	27	11	21	17	2	10	19	107	1986	1
PNS1	79	148	99	326	2700	0	0	32	9	23	27	1	12	3	107	1987	0
POP1	63	130	92	285	2967	0	0	14	14	27	20	2	2	28	107	1988	3
NUP133	55	125	101	281	2987	1	0	27	9	21	23	0	4	23	107	1989	2
DOG2	104	491	313	908	1146	2	3	21	11	27	35	1	3	8	106	1990	0
SNL1	127	454	291	872	1180	1	1	16	13	16	21	3	10	27	106	1991	0
NNR1	91	375	244	710	1415	2	1	9	15	17	40	2	13	10	106	1992	0
MRP17	118	365	218	701	1435	1	2	27	16	15	25	1	9	13	106	1993	0
REX2	91	296	215	602	1638	0	0	30	7	23	25	0	7	14	106	1994	0
COQ1	87	292	193	572	1712	1	1	27	10	17	34	1	8	9	106	1995	1
PAL1	89	231	168	488	1955	0	3	18	10	25	20	1	11	21	106	1996	3
KAE1	109	210	152	471	2007	0	0	32	11	14	24	0	6	19	106	1997	1
RBA50	76	223	168	467	2021	0	1	22	5	17	25	2	8	27	106	1998	3
[truncated: 3,537 more rows]

## Sheet: RawReads-no_rRNA
Gene name	polyA_control_10_05_18	polyA_control_09_02_19_1	polyA_control_09_02_19_2	total_ribominus_polyI_09_11_19	total_polyI_03_03_19	polyA_polyI_10_07_18	polyA_polyI_12_14_18	polyA_polyI_06_19_19	polyA_polyI_09_02_19	polyA_polyI_09_25_19_1	polyA_polyI_09_25_19_2	polyA_polyI_10_01_19	ChrA_polyI_09_11_19
SUM reads	1361536	4050009	2682640	30075	10576	391486	160756	287396	430032	22249	145402	304367	61606
TDH3	26987	75046	50121	38	100	7780	1990	2198	8249	359	2583	3191	297
ENO2	14880	45279	30900	106	97	4303	1775	3746	6338	266	2332	2502	176
RPS31	14424	47077	31098	617	83	4356	1773	2981	3901	143	1066	3343	54
FBA1	14344	59316	40983	81	125	4326	1733	3853	7535	318	2446	2835	109
ADH1	13970	43156	28176	140	103	4114	1719	3192	5999	249	1871	2288	82
GPM1	13866	46616	29885	38	82	3289	1623	2699	3131	118	861	1759	71
CCW12	13440	30551	22527	22	177	5489	2490	2782	3581	293	943	3092	105
PDC1	12066	28694	20538	29	98	3273	1304	3112	4707	175	1747	2787	167
TEF2	10690	30883	21259	152	67	2649	1037	2463	5059	317	2446	2676	111
TEF1	9470	25253	16920	140	74	3017	1069	2152	3371	103	1094	2863	119
RPS12	9372	29458	19026	444	42	2666	996	1786	4287	236	1294	3227	55
gag-pol_20fusion_20protein	8739	11310	8195	63	59	2555	908	2152	1884	66	671	694	4783
CDC19	8404	28050	18727	101	75	2929	979	1947	3538	102	1093	1662	108
PGK1	7785	23212	14964	46	44	2610	643	1352	3889	120	1110	1024	95
RPL39	7756	12042	9436	50	28	1393	881	733	492	35	125	626	4
TPI1	7562	29269	19091	33	68	2203	900	1594	3118	112	918	1514	38
RPL28	6908	23080	15397	283	45	2219	933	1452	2281	108	766	2248	47
RPS20	6655	19885	12996	119	32	1893	810	1455	1307	64	376	1750	29
RPL41A	6345	12765	8693	313	38	2273	904	695	1388	86	426	1064	20
RPL41B	6047	16066	10853	261	13	1487	501	428	682	23	149	666	2
RPS2	6003	16252	10321	128	39	1626	725	1311	1694	89	555	1696	41
RPS3	5965	18273	11987	58	47	1679	730	1358	1450	49	417	1585	38
TDH2	5918	24492	15807	17	45	2006	690	1287	3491	137	925	659	41
RPL25	5839	20296	14123	5	44	1452	578	1108	2882	190	1183	1712	56
RPL30	5768	18453	12298	36	43	1921	874	1196	830	42	281	1402	17
RPP2B	5744	18009	11774	17	24	1703	679	1107	1072	48	386	1554	14
RPL38	5632	19701	12504	110	30	1681	687	1084	1228	72	345	1674	10
RPS5	5599	17433	10787	23	42	1614	637	1322	2497	130	909	1714	31
RPS23B	5279	17748	11445	164	26	1502	595	1086	1911	94	619	1445	30
RPL32	5215	15379	10599	6	41	1523	520	906	1418	82	467	1574	29
RPL3	5175	14715	9417	218	27	2033	540	797	1048	49	384	1167	50
RPL23B	5169	16317	9950	189	36	1156	513	1055	2103	149	874	1182	16
RPL40A	5112	16752	11010	48	41	1428	610	910	1394	100	495	1438	28
RPS10A	5062	13280	8853	29	32	1286	630	995	1654	90	449	944	17
RPS25A	4976	18434	12320	108	27	1532	730	1204	2539	255	1040	1737	13
RPL29	4925	11236	8116	171	14	1245	559	470	797	38	138	837	4
RPS8A	4887	15598	10271	59	35	1413	563	1062	1565	69	653	1406	36
RPS30A	4884	16064	10850	37	34	1482	631	1068	1672	87	521	1255	11
RPP0	4823	11308	7467	45	37	1531	612	1135	1313	68	412	1273	48
RPL2B	4803	14019	9036	106	26	1164	540	967	1843	164	959	1299	40
RPL27A	4762	14803	9630	243	41	1156	594	1062	1308	66	407	1026	12
RPL18A	4741	13299	8822	36	31	1333	535	958	1676	70	663	1495	36
RPL26B	4732	14592	9420	29	32	1430	620	1098	1892	100	653	1393	16
RPS27B	4700	9598	7072	20	27	1475	533	631	1059	46	195	901	13
RPS9B	4658	14167	9466	19	32	1471	646	1011	1030	31	375	1622	24
RPL36B	4638	15465	10464	6	25	1102	524	930	1827	86	604	1336	25
RPS28A	4605	14222	9254	37	13	1198	559	794	1552	99	459	1001	12
RPL42B	4583	14582	9730	161	38	1207	560	860	1234	61	331	1205	14
RPL9A	4572	14843	9595	210	24	1210	514	853	651	32	202	1050	18
RPL43A	4547	14564	9739	17	34	1149	549	690	838	52	238	1177	19
RPL10	4515	13265	8647	365	31	2098	784	1287	1768	59	744	1597	46
RPS26A	4506	17238	11866	1	33	1272	503	863	1219	59	429	1437	45
RPL14A	4472	15161	10195	50	24	1261	550	912	1273	56	395	1195	34
RPP1A	4424	13999	8900	23	19	1052	582	809	494	40	170	929	13
RPL5	4417	10609	7420	11	41	1253	519	1024	974	73	338	1028	41
TMA19	4412	17174	10776	243	32	1254	557	931	1776	107	599	1347	28
CWP2	4386	12878	9406	11	39	1608	544	715	2509	266	1027	1085	21
RPS22A	4384	13173	8912	21	32	1522	587	989	1121	67	322	1095	22
RPS13	4339	14238	9117	16	42	1313	417	787	1394	92	469	1371	31
RPL7A	4311	10534	7107	21	28	1224	522	846	1083	50	404	1121	34
RPS30B	4298	10226	7370	7	18	1083	441	647	1406	103	372	894	6
RPS21A	4229	13131	8834	71	23	1032	501	828	1377	100	521	1005	13
RPL31A	4202	15509	10347	5	26	950	441	708	1382	84	488	967	10
RPS15	4190	13132	8593	6	24	1226	529	857	1389	128	612	1143	32
RPS7A	4155	13974	8655	140	27	1039	470	888	759	41	253	906	24
RPS1B	4111	13117	8529	99	29	1113	411	947	1744	85	654	1126	42
RPL13B	4107	12682	8596	33	29	886	410	656	594	27	206	862	20
RPL33A	4101	12337	8111	18	24	1057	419	810	1544	108	601	1212	19
RPS14A	4092	15092	9816	6	37	1205	548	766	681	43	248	1091	23
RPS24A	4092	14316	9709	36	25	1063	509	963	1742	148	777	1211	10
RPL22A	4065	12337	8109	76	21	1093	521	701	660	29	165	959	5
ASC1	4014	11568	8008	234	32	1610	443	1009	1335	50	377	1249	44
CPR1	3980	11143	7000	20	32	1003	460	730	783	40	243	511	18
RPS21B	3973	10454	7000	9	22	1006	471	704	1013	37	209	1272	8
EFB1	3968	9778	6526	19	12	1030	380	646	771	23	219	985	51
RPP1B	3930	11545	7680	4	24	1004	477	738	1283	61	411	1127	19
RPL20B	3919	11844	7618	9	17	945	440	748	1246	65	370	923	20
RPS18A	3887	11732	7689	44	27	1142	446	718	1102	46	343	1153	30
SNR39	3869	9917	6630	9	19	973	414	707	851	46	355	895	20
RPL35A	3824	13417	8470	30	16	800	399	623	1053	56	382	962	7
RPL19B	3812	11534	8215	15	21	1019	405	751	785	24	249	1012	25
AHP1	3801	6102	3854	1	23	1001	408	790	662	37	203	435	14
RPL12B	3801	11865	8122	5	21	1016	358	678	1225	60	638	906	16
gag_20protein	3766	5840	3783	9	21	573	209	676	540	24	268	190	1029
RPL1B	3732	11057	7046	167	19	1486	521	847	731	36	207	1079	44
RPL4A	3724	9269	6232	11	20	1109	529	851	380	15	117	440	26
RPL42A	3716	11188	7469	61	24	787	354	607	1102	64	278	842	17
SNR24	3715	11118	7645	163	30	1438	385	903	1081	45	328	1052	25
RPS23A	3713	12245	7349	141	24	1006	395	875	1598	94	616	1073	15
RPL34B	3708	12640	8719	6	26	1091	473	786	928	48	300	996	15
RPL8B	3689	11128	7396	5	26	1058	462	746	813	26	210	873	34
RPS18B	3685	11680	7249	114	19	978	367	756	1332	91	482	946	10
RPL40B	3647	11713	8198	19	34	1010	395	725	1294	65	435	1161	15
ZEO1	3644	7197	4699	58	13	749	369	687	980	95	436	583	6
RPS4A	3598	10307	6995	77	35	1070	470	786	1101	48	354	937	41
RPL11A	3581	10884	7289	54	20	1046	372	699	992	18	290	971	16
SNR18	3554	9158	6082	10	4	810	223	336	549	20	168	467	38
RPL21A	3529	11237	7457	44	21	926	399	730	1306	96	510	1024	25
RPL43B	3518	8611	5747	126	34	941	351	594	883	55	255	722	3
RPS8B	3485	10673	6915	13	17	856	398	711	1237	77	508	914	28
RPL37B	3463	9950	6576	11	17	962	345	554	1157	62	272	1063	11
RPS1A	3447	11281	7113	67	24	823	372	750	1306	87	582	812	25
RPS17B	3437	9711	6283	120	26	860	356	779	1406	72	378	1075	9
RPS10B	3391	8640	6351	30	20	935	475	629	719	54	205	653	6
RPS17A	3306	10548	6998	127	32	1182	526	878	1407	62	442	1194	27
RPS16A	3272	11622	7382	68	25	765	351	632	1305	126	547	943	17
RPL37A	3238	10289	7009	2	28	779	393	574	1124	64	323	852	7
RPL24A	3237	11834	7858	5	27	1021	487	729	1125	61	409	903	15
RPL21B	3206	10078	6445	7	28	825	393	618	1279	53	454	952	19
RPS6A	3157	9966	6489	75	23	983	364	846	1418	81	680	1033	25
RPS19B	3150	10885	7312	59	25	905	417	629	836	39	330	885	24
RPL6A	3132	11362	7286	5	29	920	396	641	707	31	194	767	14
HOR7	3104	13478	8695	6	24	646	348	713	1941	134	785	113	4
RPS16B	3101	9724	6072	23	28	808	321	602	1006	45	290	846	23
STM1	3100	9902	6147	50	13	685	292	636	826	31	302	653	16
RPL15A	3063	9335	6016	170	54	1885	854	1300	1243	79	496	1103	31
RPL16B	3001	9879	6454	24	38	1014	333	669	777	42	273	1015	26
RPS29A	2950	7191	5159	8	10	649	312	344	503	56	162	624	8
TSA1	2946	9203	5163	6	22	667	271	596	1260	85	535	551	16
RPS0A	2942	7967	4744	7	16	668	255	580	956	87	443	661	14
RPL17A	2936	8636	5972	5	22	889	347	622	682	29	211	757	12
RPP2A	2893	9712	6941	9	41	1211	547	971	772	19	223	1114	27
RPL1A	2853	9419	5915	46	31	800	307	620	1158	45	298	924	25
RPL2A	2826	8152	5312	45	15	700	322	636	811	40	325	731	25
RPS29B	2816	7087	5071	4	13	746	276	386	716	44	171	635	12
RPS4B	2772	7522	4969	81	29	847	318	642	744	39	221	897	29
RPL19A	2692	8849	5904	9	15	719	349	562	383	21	140	550	21
RPL20A	2612	8539	5516	6	21	653	270	448	835	36	250	732	17
RPS11B	2608	6865	4637	12	20	719	304	468	423	22	146	537	17
RPS11A	2599	6849	4503	4	17	642	285	426	562	28	166	617	18
SSB1	2496	7327	4922	54	14	746	282	662	719	23	199	651	60
RPL24B	2482	8966	5930	48	13	703	312	537	955	44	286	802	10
RPL12A	2459	8459	5377	22	10	709	268	481	815	44	271	747	16
RPL23A	2434	8264	5137	97	14	578	284	558	906	82	421	799	14
RPS19A	2413	8316	5514	18	9	618	248	467	1018	55	346	855	14
SOD1	2405	6090	4053	21	11	599	255	411	611	28	186	359	9
GPP1	2350	7126	4316	0	21	596	233	393	866	56	269	526	13
HHF2	2280	5447	3850	10	11	658	354	523	534	23	139	634	5
RPL11B	2276	5629	3769	11	19	587	258	438	578	26	170	605	9
ENO1	2274	18700	12381	4	26	735	292	497	1865	67	526	118	10
RPL26A	2269	5876	3995	8	14	465	219	339	419	21	143	577	9
RPS28B	2266	6090	3854	40	2	894	182	202	340	22	223	383	1
RPS26B	2241	9084	5920	1	21	615	316	517	792	37	259	632	12
HHT2	2229	7926	5372	49	22	670	296	486	1373	27	473	930	13
RPL34A	2212	7986	5221	5	20	549	225	387	654	37	183	560	14
RPL27B	2187	6035	3817	18	11	534	215	368	526	34	176	506	9
HTA1	2183	6391	4312	5	13	665	298	443	711	39	253	915	4
HHF1	2177	5141	3190	11	7	507	246	402	667	40	258	755	5
HSC82	2171	3653	2521	26	14	688	291	611	408	23	124	332	19
RPS6B	2159	7114	4267	66	8	763	294	605	1125	79	487	707	34
ACT1	2141	7162	4575	5	21	696	211	516	851	44	195	334	33
RPL33B	2124	5136	3178	63	11	438	183	323	623	66	252	526	6
HHT1	2115	5214	3408	72	11	512	239	451	692	30	230	902	5
RPL16A	2115	6702	4370	5	34	562	235	380	699	36	206	550	13
PSA1	2103	5909	4026	67	13	567	220	543	837	70	381	602	20
PGI1	2091	6461	4279	39	9	555	163	431	756	31	252	308	25
RPS0B	2080	5819	3702	8	15	570	183	440	663	33	278	614	26
HTA2	2065	6990	4425	24	14	631	235	440	827	30	279	724	7
SED1	2030	6407	4019	0	14	351	133	265	982	70	442	133	10
HTB1	2002	6450	4178	1	11	398	211	306	591	37	215	608	2
RPL35B	1997	7330	4840	13	12	506	257	400	728	42	258	589	7
PMA1	1919	2573	1712	11	18	992	326	832	874	67	499	359	82
CUP1-2	1891	5476	3790	11	11	319	202	201	485	44	146	192	4
YEF3	1885	4922	3446	104	21	730	283	756	857	43	350	621	143
BMH1	1857	5158	3376	11	10	519	198	498	1134	54	384	459	9
RPL13A	1841	5239	3709	2	13	515	208	325	561	35	202	534	11
CUP1-1	1803	5588	3744	13	9	327	187	245	495	32	155	185	5
RPS25B	1766	5248	3490	16	12	499	226	419	667	36	230	552	6
EFT2	1758	3791	2629	15	8	553	203	529	657	34	296	363	49
TEF4	1738	4669	2875	5	12	474	189	375	511	18	176	428	29
HSP150	1705	4870	3229	0	13	434	152	311	809	68	370	227	16
RPL4B	1682	3796	2425	2	11	442	205	367	353	21	136	336	15
RPS27A	1643	4670	3082	4	15	444	185	353	456	19	148	462	4
RPL36A	1597	5268	3431	1	12	352	173	254	209	8	54	308	4
ARF1	1580	5733	3721	42	19	368	133	287	470	16	143	409	3
SSB2	1578	4682	3125	30	21	588	232	540	448	17	132	421	47
RPL14B	1572	4739	3125	23	12	375	166	329	655	60	277	523	7
VMA3	1551	4293	2894	3	13	706	276	523	824	47	371	348	21
MMF1	1545	6046	3705	12	8	388	155	296	621	17	158	361	12
MRH1	1509	4451	2893	4	15	457	195	463	836	94	361	253	11
FPR1	1505	4893	3170	9	9	304	151	254	437	20	138	311	6
RPS24B	1494	3894	2409	1	19	445	180	248	254	9	50	307	9
NCE102	1487	2759	1786	0	11	396	149	279	439	29	181	110	2
GSP1	1466	4509	2886	4	17	448	145	301	477	18	127	405	13
TRX2	1464	4584	2708	9	11	289	127	220	507	41	170	191	3
RPL17B	1452	4302	3050	14	21	494	237	427	639	27	227	484	13
GAS1	1446	3286	2171	9	13	642	208	542	611	43	234	364	21
COF1	1423	5307	3380	13	12	362	168	302	489	28	163	337	7
HXT3	1421	1939	1249	14	6	549	190	326	271	15	99	440	35
SNR38	1396	4078	2454	0	7	332	117	259	297	13	116	269	14
EGD1	1395	5272	3541	1	13	387	188	323	783	68	386	407	9
ECM33	1369	3189	2058	3	12	418	153	364	596	44	244	274	27
EGD2	1359	5097	3343	0	13	385	163	365	644	71	311	484	4
RPL31B	1352	3741	2701	1	8	350	191	232	270	16	99	305	1
GCN4	1337	3430	2082	1	8	501	178	435	734	43	293	354	15
TIF2	1336	3829	2694	6	10	433	146	304	487	25	124	369	13
MBF1	1322	2584	1642	4	5	574	157	252	277	8	112	176	7
CIS3	1304	3413	2060	4	10	383	164	297	444	26	139	315	11
HTB2	1294	2714	1729	1	5	303	101	203	296	22	113	556	7
RPS7B	1269	3999	2583	3	5	385	148	272	359	23	133	379	15
PMP3	1247	3623	2364	3	12	402	179	239	855	46	223	265	3
RPL8A	1228	4210	2617	4	11	407	150	317	421	17	143	317	18
BGL2	1216	3856	2522	1	15	435	210	333	606	38	224	234	5
EFT1	1215	2861	2068	13	12	387	132	319	220	6	55	162	42
RPL6B	1212	3520	2371	11	16	452	178	330	479	28	277	403	25
SSA2	1205	1576	1164	7	11	663	260	625	518	28	184	331	46
TRX1	1179	4046	2657	15	7	299	123	195	335	25	101	205	10
MFA1	1163	707	475	0	0	287	120	72	104	6	18	53	0
PMP1	1159	4333	2750	2	16	574	207	380	589	33	224	326	9
RPS22B	1156	3612	2403	89	9	297	135	249	566	33	155	404	304
PDR5	1145	740	526	10	3	337	144	304	58	5	21	94	63
ACB1	1117	4736	3202	1	8	322	108	186	435	16	111	213	6
NOP10	1117	3715	2548	20	3	289	153	170	315	18	77	283	1
SUI1	1110	4010	2780	4	8	280	136	201	519	38	187	298	5
SNR44	1109	3522	2317	86	8	267	125	233	510	30	151	371	302
HYP2	1085	3494	2282	9	15	756	359	499	420	27	135	488	19
CTS1	1081	1890	1210	1	5	301	110	195	344	33	173	246	9
HXK2	1076	4285	2896	17	12	430	159	346	647	43	295	206	9
NTF2	1073	3713	2435	5	7	306	138	260	396	12	109	289	7
PFY1	1065	4001	2461	10	8	254	112	196	363	16	107	184	4
PDI1	1051	3116	1969	1	3	256	102	234	311	9	87	151	8
PMP2	1048	3196	2009	14	15	919	228	336	932	36	343	404	7
HSP104	1029	2783	1953	2	7	265	132	207	312	15	105	12	9
HSP10	1019	2383	1648	1	6	250	83	168	174	7	36	133	3
TMA7	1019	3010	2089	31	6	289	136	183	320	12	85	200	1
GIS2	997	3161	2077	14	11	244	105	198	631	22	192	351	0
PNC1	996	3795	2590	2	6	197	119	139	239	7	73	12	0
SEC53	996	2500	1633	36	2	246	104	195	429	17	132	261	8
SNU13	989	2706	1955	2	7	201	99	175	290	11	87	363	6
IPP1	981	3602	2438	0	10	324	160	244	190	9	46	181	13
YOP1	969	3373	1911	8	4	252	106	170	152	5	43	118	4
SND3	959	2751	1801	32	8	441	195	291	182	16	44	194	4
HSP30	958	703	441	1	2	225	114	206	134	9	57	11	0
TDH1	925	8104	5329	1	19	374	155	262	546	36	186	9	5
GLN1	923	9111	5702	2	16	214	104	188	1229	90	466	165	30
OLA1	923	2293	1576	5	5	281	107	213	248	11	58	197	10
RPL9B	915	2338	1498	11	10	275	131	220	208	8	56	193	21
RTN1	910	2194	1525	2	8	203	70	147	223	8	72	145	5
SSA1	901	2251	1626	4	12	430	214	392	218	13	68	95	25
TIF1	900	2821	2072	21	11	442	215	328	574	44	287	305	26
SSS1	897	3088	2150	0	3	223	97	164	268	14	86	193	3
YRB1	889	3309	2095	21	10	290	144	195	241	10	74	281	3
SRL1	884	1661	1123	0	5	217	54	166	405	41	172	162	7
UBC4	859	2459	1640	1	13	221	108	191	182	13	61	189	3
SAH1	848	2827	1943	2	5	233	67	185	272	31	111	193	8
STE2	847	1841	1285	1	3	207	94	179	196	12	69	119	6
POR1	839	3911	2401	1	13	211	92	167	349	18	118	88	9
SSE1	837	1579	1141	11	4	217	108	202	250	9	112	155	19
TIP1	833	3856	2397	0	6	211	74	125	496	42	221	121	2
CDC33	825	2778	1698	9	8	232	88	170	295	15	85	248	5
SSC1	823	1957	1373	2	3	260	83	196	195	9	67	85	20
YHB1	806	4356	2917	19	10	209	97	164	202	12	54	160	9
STF2	802	5898	3740	3	11	183	86	111	446	33	175	17	2
BAT1	798	2082	1261	4	4	218	77	194	623	19	183	168	3
CYS4	792	2385	1707	1	6	212	77	178	247	11	82	174	10
KRS1	784	2425	1582	6	2	283	98	215	216	6	57	213	11
TIF11	784	3076	2007	6	2	242	85	180	228	24	83	223	2
SUB2	782	2145	1492	17	9	245	99	233	300	3	81	278	8
SES1	767	2335	1623	10	9	175	85	183	151	6	48	137	2
HSP82	764	1025	658	11	3	176	95	157	69	0	14	29	3
YDL124W	763	2460	1503	0	7	165	88	113	174	7	49	12	2
LSP1	761	2926	2084	0	6	157	90	125	191	6	44	44	0
MPC2	761	3163	2062	31	4	204	80	145	137	14	38	153	1
SBA1	757	2853	1838	13	4	167	75	149	335	4	132	147	7
APE3	754	1769	1289	2	13	343	151	279	307	7	59	239	5
OYE2	743	2323	1586	11	3	192	68	172	221	12	75	144	8
VTC1	740	4777	3192	2	16	205	86	131	407	18	148	202	7
CCW14	735	1961	1225	1	6	194	62	107	320	26	137	116	0
MFA2	735	1096	739	1	10	246	130	89	312	42	96	115	2
YDJ1	734	979	728	12	1	239	86	202	150	11	29	187	3
TAL1	730	2650	1483	7	7	190	85	172	219	8	71	120	11
ADK1	728	2792	1705	16	10	270	143	256	489	19	181	233	9
PIL1	723	1782	1159	0	5	167	60	150	199	2	60	86	7
IMD4	718	1367	917	11	4	201	63	152	124	7	25	182	26
KAR2	712	1142	788	3	3	322	105	253	181	9	61	94	14
HOM2	711	2543	1725	28	2	191	73	172	301	14	104	116	11
VMA4	711	2578	1790	2	6	236	97	162	152	8	56	163	4
ARC1	707	1937	1254	3	2	179	91	153	196	4	79	141	6
GLK1	698	2592	1821	1	2	190	33	39	299	8	123	9	10
SIS1	697	988	597	6	0	231	89	179	114	2	39	47	2
THS1	694	1731	1160	31	6	238	80	217	194	6	64	190	15
GND1	689	1887	1192	10	1	196	65	162	251	12	78	108	11
NSR1	689	1759	1130	13	11	181	78	156	125	5	35	275	9
SAM1	689	1947	1204	11	4	145	65	126	178	16	71	180	7
GUK1	687	1782	1184	9	2	209	67	159	151	8	24	192	2
ZUO1	680	1924	1184	0	4	229	87	167	162	3	43	202	5
URA1	679	3078	1910	47	5	187	76	112	285	14	89	416	0
SML1	678	1926	1337	1	3	140	45	74	176	13	43	102	5
EXG1	666	1978	1275	3	4	210	66	169	283	9	108	182	10
TRR1	666	1825	1233	7	3	170	59	148	183	6	62	150	4
SCW10	659	1234	791	2	5	196	82	127	225	21	94	168	4
LEU1	657	859	677	8	0	181	82	128	133	16	59	68	11
HOM6	649	2060	1283	14	7	211	84	161	157	9	38	137	3
ASN2	642	1418	892	16	5	166	67	141	162	2	35	126	4
ERV25	642	1806	1120	16	8	184	82	114	130	7	38	119	3
TKL1	642	1840	1209	7	11	150	61	196	268	20	95	168	12
NOP1	641	1400	958	1	5	219	67	179	214	5	72	242	3
SSZ1	637	1552	1015	22	4	167	65	171	154	11	37	165	8
HSP60	636	976	629	6	2	216	78	169	130	2	50	77	12
TIM10	636	2666	1817	0	2	154	66	108	238	10	68	130	3
DED81	634	1675	1165	2	5	182	71	156	204	8	73	160	11
ADO1	633	1696	1055	18	5	160	56	141	245	11	84	166	3
SBH2	633	2031	1406	24	2	177	98	93	137	11	42	128	2
VMA10	629	2968	2101	2	0	189	109	117	169	10	68	120	6
EMP24	626	1749	1048	9	6	174	70	146	138	6	43	110	3
ERG3	626	1336	945	5	1	182	71	132	208	12	71	158	8
YRA1	625	1963	1202	7	1	206	92	156	185	7	61	165	3
GUA1	623	1171	739	12	3	152	78	127	152	4	36	177	10
PDA1	623	1565	1132	1	5	182	77	151	211	7	73	93	11
BMH2	621	2235	1366	1	3	120	48	105	193	10	95	97	1
ATP2	616	3538	2321	0	6	239	37	128	360	12	106	103	5
CBR1	613	1498	1003	14	2	208	91	125	78	1	18	79	5
NOP56	612	1686	1014	3	5	172	64	115	206	6	79	194	6
UTH1	611	1452	942	3	8	483	166	301	415	31	203	283	15
YPL225W	611	1953	1175	5	3	139	58	121	106	1	41	100	2
RGI1	610	1776	1113	1	3	89	48	52	173	7	43	3	1
ERG11	607	1887	1167	0	2	109	57	151	266	10	90	127	6
ADH3	606	1667	1061	17	3	183	60	142	295	4	77	125	10
SGT2	606	1485	1054	12	3	182	78	168	214	8	75	110	4
UGP1	603	2421	1497	4	4	205	66	143	214	10	51	48	5
ILV5	601	2531	1695	5	6	231	97	197	386	16	195	262	23
YPT1	600	1881	1141	12	3	122	88	102	138	3	51	125	4
GRS1	599	1427	999	5	2	178	62	132	208	9	63	135	7
RNR4	598	2389	1656	4	5	218	68	155	202	5	48	125	6
NHP2	597	1899	1226	7	4	145	65	147	256	13	92	231	2
YBR085C-A	595	1583	984	0	3	150	63	95	177	8	60	34	2
SAR1	591	1922	1287	2	5	189	50	103	119	4	44	119	4
RPL18B	587	957	574	5	3	139	62	124	81	1	21	164	4
VOA1	585	1601	1044	12	5	206	103	148	223	9	84	113	3
CHA1	583	1453	932	0	6	147	63	117	154	2	44	251	4
THR4	583	1400	892	2	1	143	54	90	137	7	33	76	9
HNT1	582	1702	1088	2	3	156	86	85	115	7	41	86	4
IDH2	576	1066	663	0	1	170	72	121	65	7	24	25	2
HPT1	575	1843	1177	10	2	138	62	104	147	15	56	213	3
RHO1	575	2151	1435	5	9	184	68	138	154	7	55	121	1
PRC1	572	1601	1064	4	4	156	70	155	228	11	89	55	4
SUI3	571	2019	1431	3	4	138	51	124	250	9	66	162	4
UTR2	571	1640	1047	7	4	112	30	84	186	7	81	132	5
PDB1	570	1506	991	0	1	222	75	130	105	8	25	104	2
YLR257W	561	2233	1557	1	4	132	74	117	144	5	51	40	4
HSP42	560	910	611	0	1	111	65	93	47	2	25	2	1
HXT2	559	1740	1164	4	8	211	77	146	347	22	136	111	4
SMT3	554	2095	1423	0	2	151	65	104	168	7	42	119	4
SNR54	552	1173	737	4	2	144	39	114	69	4	12	111	13
CMD1	547	2015	1311	0	4	125	61	86	115	8	26	107	2
GUS1	547	1558	1155	14	4	198	73	178	117	3	30	104	7
RIM1	546	1611	1160	0	3	122	62	98	166	4	41	92	1
STI1	544	665	473	0	4	142	61	94	36	1	15	47	3
TIF34	542	1362	910	3	1	142	65	84	110	7	32	116	3
YNL208W	542	2599	1707	5	2	132	58	119	316	13	116	78	6
CYS3	541	1415	944	0	4	154	38	115	173	5	65	97	1
ARF2	540	2036	1280	1	7	139	57	90	161	7	48	104	4
VMA13	540	1533	1039	7	4	125	62	104	49	4	21	44	4
ADE13	539	2905	1839	13	2	153	82	133	374	11	104	182	4
ERG2	536	1520	1074	4	0	137	86	141	254	12	101	152	2
SBP1	534	2257	1385	5	7	132	57	113	212	7	74	86	2
YGP1	534	1774	1170	0	5	99	47	86	167	6	41	11	1
RPO26	527	1810	1121	3	5	89	54	68	162	7	52	110	4
ARO4	525	2167	1470	0	5	143	69	133	266	5	81	145	2
TPS1	524	1508	1115	2	4	124	69	108	82	7	27	12	4
QCR8	522	2117	1269	11	0	115	65	81	201	13	85	71	0
PAA1	519	1860	1165	2	4	106	57	105	118	9	29	80	3
SUP45	517	1648	1114	10	3	178	66	165	320	10	60	198	7
CPR6	516	802	609	2	5	173	74	122	95	2	22	97	5
PYP1	516	1975	1185	4	4	155	56	91	168	9	48	135	3
TOM6	516	1503	1146	2	2	112	40	59	216	11	39	55	3
TPM1	513	2173	1415	9	2	99	50	81	117	3	38	86	3
BAP2	501	445	367	5	0	217	79	166	66	0	18	72	11
VMA7	499	1938	1329	22	3	165	98	156	139	6	31	88	2
YSY6	494	1488	961	14	2	108	66	82	134	12	51	93	1
CMK2	492	810	508	1	1	89	49	123	100	7	34	12	4
CPR5	491	1411	923	9	4	173	77	119	158	5	46	97	1
ALD6	490	1403	890	2	2	140	72	136	173	10	53	137	7
RPL7B	490	1078	716	2	2	125	45	82	70	7	15	96	5
PEP4	488	1824	1233	4	6	135	51	144	287	19	71	30	5
RPB10	488	1475	994	0	2	101	61	57	95	3	16	114	1
YET1	488	1791	1186	0	2	102	58	65	129	6	36	33	1
ABF2	486	1441	945	0	5	146	56	82	109	10	48	72	4
SPI1	479	1516	1039	0	3	96	54	60	103	7	38	5	0
TIF35	479	1438	905	24	4	120	58	102	113	3	38	134	1
SEM1	477	1716	1082	8	7	111	44	86	175	10	51	59	1
ELO3	476	1026	615	6	3	204	54	137	207	11	53	167	7
TUB2	475	1214	700	4	0	117	32	56	113	8	35	69	8
ERG25	474	1435	936	0	2	123	37	79	170	6	51	102	0
IMD3	474	1300	955	2	3	134	50	114	183	13	43	124	7
FRS1	473	1089	795	10	4	142	59	96	137	10	45	82	3
SNA3	473	1884	1205	0	4	119	46	64	170	9	53	66	1
ERG20	472	1619	1033	9	3	86	55	92	64	4	20	56	2
ILS1	472	1100	756	22	3	185	65	163	159	9	40	130	21
ARO2	471	1481	1010	11	3	121	43	133	158	10	40	149	3
CDC48	470	1457	907	8	4	165	58	112	178	3	58	66	5
ERG4	469	981	628	11	1	163	45	110	122	8	42	86	1
PRS1	469	930	663	4	2	139	65	123	84	1	23	124	6
PRE9	467	1610	1015	3	2	141	52	81	124	10	26	76	6
TOS1	465	1270	731	0	9	192	54	158	296	23	139	128	12
VMA6	465	1518	984	5	4	123	83	163	44	3	14	40	9
ILV3	461	1736	1159	7	9	162	53	138	276	9	80	133	20
MEO1	461	1914	1173	12	1	152	67	37	157	3	63	62	5
SAM4	461	1259	745	3	1	102	42	93	142	7	58	124	5
RET3	460	1498	935	4	3	130	76	92	96	6	27	72	2
ERG6	459	1581	1004	7	6	117	46	126	178	10	42	143	2
SCS2	459	1233	796	3	0	114	59	74	118	3	36	78	1
TYS1	459	1258	862	1	1	125	51	108	138	6	40	147	2
PHO3	458	555	353	1	1	121	51	93	63	7	15	56	5
SBH1	458	1296	901	2	2	129	46	64	129	6	36	107	5
CAM1	451	1215	745	3	4	172	52	116	122	5	29	86	4
ACO1	448	1011	667	6	3	110	62	114	182	16	76	28	14
HXT7	447	5110	3486	3	13	142	65	142	1237	83	548	5	1
FCY1	446	1691	967	4	4	122	62	108	254	15	93	160	11
IRC22	444	998	697	11	0	163	49	109	108	2	28	66	0
PIR1	444	1214	748	0	4	137	44	114	191	14	77	98	6
CWP1	443	953	668	1	4	97	40	65	78	5	32	35	0
ERG10	442	1404	853	21	3	125	41	111	165	8	38	110	10
GDH1	442	1910	1261	25	1	131	42	113	134	6	33	150	7
PET9	441	2278	1412	2	7	181	54	108	343	33	136	117	4
RPL22B	441	1118	723	0	0	108	39	62	110	4	34	87	2
PRE2	440	1355	816	14	3	79	38	69	99	3	29	56	5
DPS1	439	1277	880	1	4	138	55	135	112	6	30	93	8
TIF3	438	1359	830	9	3	128	55	123	284	16	100	205	4
VMA11	438	1821	1234	1	6	221	74	165	212	9	46	119	0
PHO84	437	4682	3208	0	16	112	48	106	679	35	263	250	19
YNK1	437	1834	1230	2	4	127	48	98	142	7	40	58	1
FCY2	436	1162	713	3	3	163	50	105	137	5	33	238	11
PFK1	436	1312	875	6	5	185	64	156	207	18	94	104	19
SCL1	436	1518	1001	2	3	100	50	71	107	4	26	60	2
ATP15	435	1596	1270	0	3	128	56	66	134	20	26	74	0
GRX1	435	1668	1044	1	3	93	48	70	164	13	38	37	0
GPD1	433	1402	942	0	2	95	57	90	216	7	64	10	2
OLE1	433	3052	2064	15	15	122	70	142	452	26	162	84	9
GAR1	432	1401	858	14	3	108	53	109	200	10	100	204	4
SNR59	432	997	647	0	2	96	35	66	47	5	12	69	4
GET3	429	1354	868	5	2	128	50	97	62	5	19	107	4
RDL1	428	1820	1205	7	2	128	71	103	140	5	43	57	3
HXK1	427	5838	3890	1	14	79	36	56	535	23	160	1	7
VPH1	426	943	645	13	1	214	59	105	71	4	26	73	11
YET3	426	1570	1034	0	2	148	65	77	148	9	50	41	4
HXT1	424	152	110	6	1	141	38	68	25	4	8	182	3
YJR120W	422	2756	1740	0	3	126	13	77	154	7	69	47	4
RPS14B	418	915	594	5	3	166	66	83	102	3	31	120	4
ZRC1	416	837	467	9	1	121	45	101	106	5	30	84	4
DDR48	415	2389	1666	2	8	114	43	90	196	12	59	18	4
HCH1	414	686	459	5	0	93	49	90	36	1	23	51	4
SHR3	414	1416	906	11	0	174	64	89	103	7	34	112	0
APA1	413	1112	777	0	0	82	41	72	83	1	30	61	2
YLR179C	413	960	677	4	3	162	83	113	87	3	26	75	6
VAS1	411	1069	731	23	2	145	59	153	152	9	38	107	10
ASN1	410	1932	1404	7	3	118	25	92	191	11	67	139	21
PRE1	409	1355	833	1	5	77	53	73	156	5	58	62	4
TIF5	408	1002	706	10	3	131	44	110	189	2	49	191	3
HIS1	407	1979	1229	12	6	162	63	120	160	10	54	153	7
PST2	407	1519	960	3	3	117	40	74	140	5	50	75	4
GRX2	406	1668	1068	0	1	80	38	68	235	13	82	36	0
YRO2	406	1294	825	0	6	123	59	88	213	8	66	8	0
PGA3	404	949	616	3	2	94	52	65	69	6	18	66	3
VMA8	404	1579	1014	13	2	118	41	114	115	3	38	105	0
ERV14	403	1237	862	6	1	114	45	89	108	4	32	115	4
ADE12	402	1764	1164	2	4	129	40	66	231	15	102	77	4
CAF20	400	1263	836	4	4	139	63	109	152	13	62	116	0
HMO1	399	1519	949	1	3	114	53	56	111	5	37	120	3
FAS2	398	917	638	8	4	153	57	135	75	3	25	60	41
NPL3	398	1400	906	1	7	105	30	95	279	10	92	129	4
PRE5	398	1218	795	0	7	73	44	78	79	1	26	67	1
RPB8	398	1040	676	1	2	92	34	73	106	6	35	142	2
VMA9	398	1720	1003	2	3	76	41	74	136	5	35	114	1
CRH1	396	986	585	4	1	98	32	64	134	8	41	53	5
PUP2	396	1346	843	9	2	98	44	82	56	4	13	69	1
RPN8	395	1198	746	13	2	109	46	95	99	6	25	86	6
ARB1	393	920	700	4	7	108	42	109	77	2	14	76	12
LSM6	393	1176	640	9	3	91	26	24	84	5	24	28	1
TPS2	393	792	536	0	5	122	42	103	87	2	32	3	9
ATP18	392	1838	1188	0	6	89	49	69	224	12	60	135	0
OST1	392	987	657	8	3	147	54	113	82	4	23	71	6
RIB4	392	2416	1553	1	9	137	48	102	147	5	39	159	1
SPO24	391	764	565	0	1	111	70	90	112	6	25	33	1
FRS2	390	787	503	0	1	116	34	91	124	3	40	74	1
MLC1	389	1024	683	1	2	96	26	67	52	3	27	78	2
PRE6	387	1356	861	2	6	72	30	61	83	3	31	75	1
SCW4	386	1068	638	0	13	283	126	195	272	15	81	100	10
ECM15	384	1372	906	8	4	100	40	63	97	9	29	57	2
SVS1	384	772	494	0	4	95	31	58	65	5	21	56	1
VMA1	384	1056	650	26	3	163	47	123	141	5	37	72	30
RFS1	383	1444	996	3	2	74	48	79	70	3	23	15	3
SUI2	382	1157	729	1	10	97	52	87	120	6	41	105	0
WTM1	381	1195	796	1	2	118	60	77	114	3	38	39	6
INA1	380	1199	734	1	3	115	36	82	174	2	47	92	9
URA5	380	1278	803	7	6	194	59	101	180	6	55	95	5
PIS1	379	1276	892	7	4	174	93	115	182	9	51	72	3
ATP1	377	1334	980	2	5	112	36	96	194	10	55	74	4
PMT2	376	573	371	6	1	121	46	82	98	4	24	61	2
LAT1	375	951	653	8	3	98	33	78	74	2	30	46	7
PRE3	374	1147	764	11	4	107	47	74	77	4	23	53	0
FKS1	373	664	464	7	4	199	70	189	139	7	27	58	68
LIA1	372	788	504	0	0	82	26	75	134	4	57	146	4
NCW2	371	751	474	2	2	81	51	65	88	4	20	17	0
PRT1	371	764	542	17	2	97	34	82	48	2	11	103	12
CBF5	370	1240	707	21	1	110	50	108	119	6	45	104	6
CIT1	370	1145	796	1	3	100	38	102	107	3	26	12	4
YDR341C	370	980	677	13	3	111	34	86	102	5	33	89	3
TSC13	369	1032	652	6	7	104	49	97	123	7	32	88	3
CIP1	368	213	155	0	1	53	23	48	21	3	11	4	0
PAB1	368	868	583	0	4	224	88	170	243	9	112	107	16
RPN5	367	1156	727	3	2	97	32	78	71	9	23	60	1
MIX17	366	949	547	3	7	86	36	79	93	3	34	109	2
SWP1	366	851	568	2	1	82	14	19	85	2	20	36	2
SER1	365	1162	702	10	1	79	33	89	57	3	17	47	4
DUG1	364	1112	691	4	1	140	35	81	121	4	37	70	6
ADE5_2C7	361	1229	831	12	2	125	38	101	158	5	38	85	10
HRI1	361	991	586	17	3	108	47	102	57	4	13	74	1
ATP4	360	1795	1121	4	4	101	44	65	169	5	49	126	4
CDC60	360	717	522	7	9	133	38	118	141	6	53	81	14
ERV46	360	769	463	9	2	103	45	99	62	2	18	62	3
ELO2	359	683	463	1	2	114	43	71	108	9	53	102	2
YMR295C	358	1155	692	5	5	74	42	90	135	10	56	75	2
YKT6	357	1382	871	10	4	101	34	69	97	5	28	82	1
RPT1	355	926	695	6	0	78	36	86	77	0	41	70	1
FAS1	353	746	527	12	7	97	50	93	85	4	23	62	54
PRE10	353	1292	870	7	4	88	42	76	77	6	22	49	2
RPC10	353	950	576	4	3	78	51	59	120	8	45	137	2
MAP1	352	848	546	0	2	110	38	81	87	3	26	94	2
HCR1	351	821	561	4	0	88	36	70	67	5	22	86	2
APT1	350	1018	608	19	5	149	65	112	102	7	45	112	3
GAS5	350	812	536	0	3	96	32	53	126	6	50	46	3
RPN6	350	955	644	3	3	95	34	86	78	2	19	45	3
SPE3	349	1090	730	14	3	163	57	103	104	7	30	89	1
TOM5	347	942	703	0	3	101	40	62	109	4	15	85	2
FUR1	346	710	468	5	4	100	48	78	70	1	20	95	0
NHP6A	346	1539	1015	1	1	123	50	65	148	12	43	83	1
PIC2	346	1582	1007	1	1	81	44	60	175	7	47	5	1
PRE4	346	1037	683	2	3	65	30	55	86	2	30	71	1
RAS2	346	887	602	0	1	83	44	79	90	2	26	23	4
RPB5	346	890	552	5	3	77	47	77	64	3	23	77	1
GCD11	345	983	707	5	3	93	41	61	76	1	35	81	7
ARC15	344	1521	1037	2	9	67	32	61	101	1	39	40	1
ATP17	344	1996	1203	11	2	107	42	60	152	7	42	89	1
RPT6	344	1036	601	2	3	77	44	73	51	2	17	51	3
IDH1	341	537	361	0	1	102	37	73	33	2	14	20	5
ATP16	340	1708	1121	3	5	84	33	58	191	11	71	68	2
GIM4	340	662	444	14	3	67	29	51	59	2	22	80	1
NDE1	340	879	596	6	1	151	44	89	123	8	51	96	3
PUP3	340	1180	809	6	1	96	36	69	110	10	31	62	3
ARP2	339	1112	717	0	0	79	37	67	110	2	27	53	3
PST1	339	821	532	0	1	65	33	60	110	7	36	31	2
GDT1	338	813	486	14	6	135	48	83	112	4	40	107	2
PFK2	338	723	514	2	4	177	61	148	162	11	57	67	21
SNC2	337	969	642	0	1	59	34	66	126	8	47	59	0
ARA1	336	1256	724	0	1	72	39	49	87	7	27	24	2
THR1	336	730	459	0	3	84	29	57	67	2	19	59	2
TMA10	336	668	443	0	3	76	39	44	68	5	30	0	0
DYS1	335	930	633	0	5	130	44	97	131	7	52	73	3
ERG9	335	1151	803	3	5	85	37	63	117	8	52	47	2
HMF1	335	1371	842	1	2	88	40	71	109	11	39	60	2
IFA38	335	795	592	6	1	118	32	71	85	1	21	40	1
PGA2	335	1180	701	17	4	74	42	50	71	1	21	56	1
TPO3	335	438	302	1	2	89	36	66	69	5	20	27	4
TSC3	335	965	632	7	0	97	29	50	94	3	29	65	1
YSA1	335	1613	1058	1	4	73	40	56	134	7	24	37	1
HTS1	333	943	583	2	2	89	22	62	94	1	47	73	8
ILV6	333	944	590	0	2	88	40	60	66	2	22	59	5
GPX2	332	414	274	5	1	89	35	53	38	1	12	77	1
PRY2	332	798	481	1	2	98	24	34	91	1	47	70	2
CCT4	331	870	610	8	1	101	32	62	59	4	17	80	1
TPO2	331	381	274	2	0	115	29	77	83	7	39	39	0
YARCTyB1-1	331	430	344	6	0	115	27	88	67	0	23	19	140
COX7	330	785	537	1	1	54	25	30	71	3	18	30	0
BAT2	327	661	484	3	3	109	35	91	55	2	18	18	7
ASP3-3	326	832	524	1	1	82	34	51	69	5	24	38	2
DBP2	326	1086	711	19	3	104	27	100	110	1	43	195	22
ACP1	324	1197	733	0	3	84	27	60	146	9	42	59	2
CLC1	324	1234	787	2	3	69	34	78	66	3	25	46	5
DSE2	324	819	624	0	2	127	53	73	198	33	132	140	3
LHP1	324	971	605	1	0	94	34	58	72	1	29	129	3
PMT1	324	454	316	4	4	87	28	113	56	9	22	53	7
SHB17	324	735	467	4	3	81	34	75	75	5	15	86	4
TMC1	324	671	434	1	1	132	71	92	51	1	9	28	2
ADE1	323	1671	1116	4	2	89	40	77	116	4	32	80	3
FES1	323	490	343	3	2	77	37	79	49	1	7	38	0
SUP35	323	667	471	9	3	74	28	66	46	2	14	61	6
GLC7	322	1184	741	3	3	85	36	92	170	13	73	103	3
RTC3	322	829	533	0	1	48	28	36	31	1	15	2	0
VMA5	322	983	639	5	2	153	64	108	113	8	60	69	7
SUR2	321	1487	988	1	1	110	41	56	125	4	30	77	3
MGE1	320	1379	935	0	3	81	39	56	91	4	30	53	3
LSB1	319	584	385	3	0	85	43	63	32	0	14	33	2
RPT2	317	958	603	4	2	87	37	61	145	3	50	66	6
SSH1	317	713	477	15	2	176	64	149	152	8	57	96	3
CCT8	316	757	514	8	2	91	45	91	56	7	22	60	4
CDC42	316	876	576	1	3	83	32	82	80	5	28	79	5
PUN1	316	404	235	2	0	85	27	56	57	2	16	27	3
RPN9	316	891	542	4	1	64	36	55	62	3	19	54	2
ATP19	315	1678	1160	1	6	72	32	46	190	15	45	69	0
KRE2	315	936	736	0	5	159	36	92	97	3	29	66	8
SOP4	315	875	595	2	1	81	35	56	78	2	23	46	1
PUP1	314	954	597	3	3	78	27	51	74	3	12	55	3
RPC40	314	811	505	8	3	77	31	76	50	3	20	91	3
RPN3	314	907	592	5	1	81	42	67	77	5	25	54	4
SDH3	314	1287	828	0	1	57	22	33	91	9	38	42	1
LSM7	313	964	606	1	2	71	39	55	68	4	14	59	0
HAC1	312	815	563	68	11	226	163	233	95	8	27	60	33
NPT1	312	750	494	2	2	86	40	70	73	2	22	63	4
SAC6	312	759	555	6	1	89	34	66	40	2	10	26	2
BTN2	311	518	324	0	2	64	35	34	35	3	9	10	0
OST5	311	989	616	1	0	88	33	70	81	3	17	70	3
WBP1	311	844	536	0	6	95	47	76	74	3	23	49	2
ERP1	309	926	534	13	2	147	59	96	106	7	32	101	2
PRE8	309	848	539	0	2	80	43	65	84	7	22	55	1
WRS1	309	857	562	4	2	70	46	79	75	5	28	80	2
YMR226C	309	914	594	0	2	103	33	56	47	4	15	49	4
ADH6	308	902	616	9	1	122	69	87	86	5	29	85	7
FAA4	308	1241	824	4	9	92	42	74	142	3	44	98	9
STT3	308	559	349	3	4	123	43	115	102	3	37	46	13
VPS68	308	933	624	2	3	83	36	63	124	7	37	31	1
EGT2	307	389	272	1	4	67	23	39	75	3	32	57	9
HXT4	307	5890	4046	0	16	95	37	54	801	47	263	15	2
RNA1	307	868	628	3	0	79	36	72	67	2	21	69	1
YPT7	307	1034	669	7	3	76	34	56	122	5	32	58	0
ITR1	304	1045	692	9	1	100	32	86	113	3	33	62	2
MRT4	304	838	519	7	5	88	37	52	50	2	19	155	2
CCT2	303	744	532	10	2	79	35	71	57	1	14	68	2
KRE9	303	676	434	3	0	59	32	43	63	2	25	43	2
SEC28	303	1114	749	0	1	91	34	61	79	2	16	50	2
VMA2	303	1051	681	9	7	166	114	179	82	2	23	55	15
YPT31	303	984	619	0	1	71	33	43	48	1	14	58	1
AMN1	302	758	500	1	1	80	36	81	97	10	23	81	4
PMI40	302	681	436	3	2	76	31	50	86	5	41	75	3
PRE7	302	1033	699	3	2	117	42	72	137	6	71	71	2
PRS3	302	629	420	9	0	89	34	73	27	3	7	63	7
RNR2	302	1197	840	1	1	95	52	74	148	6	42	54	7
ARP3	301	912	630	0	2	74	25	63	69	5	19	36	5
ASP3-2	301	838	492	0	1	89	29	62	64	5	20	42	4
LYS12	301	648	420	3	0	79	42	56	54	0	11	57	5
NHP6B	301	1238	853	4	2	70	32	44	127	7	20	84	0
DSE1	300	593	440	4	2	93	39	73	26	1	11	50	11
EMC3	300	871	511	6	3	99	27	78	57	0	13	47	2
PRO3	300	852	596	6	1	91	28	80	123	8	46	68	2
SEC13	300	853	604	2	0	93	39	106	110	3	34	84	2
SOD2	299	1015	629	0	5	69	30	52	150	4	37	43	3
YHR020W	299	712	472	1	6	97	45	90	44	3	21	63	8
YIP3	299	634	441	0	2	75	36	58	70	7	27	46	1
ASP3-1	298	797	561	1	0	102	47	55	60	1	17	38	7
QCR7	298	1880	1239	4	4	78	38	54	190	17	62	85	2
TMH11	298	1124	773	3	3	104	49	68	95	4	22	49	3
AAT2	297	748	518	5	2	149	32	92	102	2	26	60	3
ACS2	297	696	450	3	3	83	25	57	56	3	23	56	10
GCV3	296	1135	742	6	1	94	37	66	157	8	55	87	3
KRE1	296	502	299	1	1	63	26	60	80	1	16	25	1
LCB2	295	692	459	2	1	77	34	72	67	1	24	46	1
SEC4	295	1042	601	8	1	64	28	73	101	4	24	28	4
ARC19	292	1247	658	0	4	66	23	34	128	3	45	39	3
ILV2	292	442	288	0	1	100	51	94	100	12	34	67	8
RPN13	291	1070	712	2	2	74	35	49	62	1	14	40	2
UBI4	291	1222	802	0	1	93	17	32	161	15	68	20	3
ASP3-4	290	854	488	0	2	83	41	47	69	3	22	50	10
CCS1	290	587	362	0	1	68	38	53	37	0	12	50	0
FET3	290	397	308	7	1	145	58	121	58	4	9	36	12
GBP2	290	760	493	2	1	87	26	65	103	1	40	94	2
MRP8	290	990	679	0	1	84	54	65	35	2	16	22	1
RRB1	290	560	377	10	0	89	24	97	54	1	20	123	3
TOM7	290	898	671	1	2	67	22	33	109	7	18	47	1
GLY1	289	738	498	2	3	156	45	107	122	5	30	108	12
RPN10	289	859	536	2	2	78	25	40	38	2	15	56	3
URA6	289	755	501	1	0	72	27	55	42	1	11	56	3
RPS9A	288	1167	692	4	3	70	40	37	75	1	23	59	5
SHM2	288	1901	1309	2	4	75	31	70	184	5	55	64	5
YCP4	288	993	588	4	0	92	31	57	82	3	24	51	1
NOP7	287	827	570	11	3	74	38	68	68	4	27	106	0
PUB1	287	945	563	2	4	88	43	77	115	4	62	60	7
GVP36	286	1038	650	7	3	72	36	60	120	2	47	70	5
MCR1	286	1258	732	2	2	86	30	56	123	6	29	19	0
RPN1	286	639	425	8	1	65	27	76	94	8	37	32	7
SCS7	286	980	679	1	3	77	29	60	73	1	15	33	3
CCT6	285	689	457	5	1	88	31	80	60	2	19	67	3
RPN2	285	702	521	6	6	81	38	68	115	6	35	57	7
TAT1	285	379	235	4	2	83	24	93	61	1	16	86	8
ELO1	284	1236	725	1	3	116	42	47	139	10	37	25	3
TVP18	284	766	472	0	3	75	32	60	96	1	27	39	1
LIP1	283	840	574	0	2	71	26	51	30	3	12	19	0
RVS167	283	699	514	0	1	55	32	51	31	1	5	28	0
ATP3	282	1397	841	4	6	70	24	57	168	10	70	64	3
DIA1	282	261	136	0	0	47	17	48	19	0	3	6	2
LPD1	282	1038	658	3	1	61	21	72	100	6	22	54	4
TUF1	281	1069	734	8	1	84	41	60	97	10	20	49	4
UMP1	281	917	573	0	1	64	27	38	56	5	16	34	0
ATP7	280	1422	965	1	8	91	37	53	99	6	16	73	1
MIC10	280	995	645	0	0	53	14	39	97	6	31	66	0
TIM8	280	709	466	0	3	58	25	46	122	4	26	47	1
TOM22	280	957	549	1	2	114	42	73	99	3	27	58	0
BRX1	279	657	420	3	1	86	20	56	79	1	20	99	5
COX8	279	1424	963	0	4	70	29	49	91	6	20	63	0
IDI1	279	729	483	6	2	52	24	70	61	2	28	73	3
TCB3	279	448	307	0	1	72	28	64	52	3	18	29	11
ERP2	278	810	574	0	0	93	45	72	68	1	17	54	4
FPR3	278	919	622	1	2	71	37	78	74	1	28	68	4
MES1	277	737	488	6	1	99	36	84	87	2	18	80	7
EMI2	275	2468	1752	0	5	82	28	53	413	23	97	7	0
STP4	275	338	225	0	1	62	17	38	48	2	18	41	0
CHO1	274	653	430	3	1	94	38	69	91	1	26	44	0
RLP7	274	599	350	11	3	68	24	40	57	5	13	108	0
SKP1	273	962	690	12	2	53	35	76	27	2	15	47	2
TUB1	273	588	422	3	3	85	28	67	75	1	16	54	1
ATP14	272	1121	736	0	0	50	29	34	107	12	33	50	1
CCT5	272	715	381	14	3	76	41	88	90	2	29	69	2
KTR4	272	708	485	2	2	69	25	50	98	4	40	24	1
NOP58	272	890	530	0	4	90	32	83	121	6	78	103	7
RIB3	272	904	616	8	0	63	21	14	59	2	26	18	2
TSL1	272	401	337	0	2	80	41	57	69	1	28	3	2
ACC1	271	532	368	6	3	86	44	77	59	4	15	51	43
AHC2	271	908	637	1	0	60	38	52	68	5	18	55	1
ILV1	271	779	482	1	2	72	28	60	63	4	18	68	8
RVS161	271	888	585	1	2	85	32	60	85	3	31	35	1
CPR3	270	796	550	0	5	107	39	52	93	3	28	53	2
GLN4	270	523	350	13	1	100	51	71	76	5	15	67	7
COX13	269	1348	880	8	2	67	28	44	88	7	24	61	3
HMRA1	269	913	626	4	5	44	32	29	94	9	25	40	1
VRG4	269	720	515	7	4	183	61	127	326	31	118	103	5
LSM2	268	868	568	2	2	96	43	53	91	10	23	35	1
LSM5	268	766	531	18	1	56	33	61	83	8	54	78	1
TIM11	267	1324	789	5	3	71	31	52	83	4	28	43	0
CCT7	266	852	548	2	4	60	28	79	82	3	20	70	1
SPT15	264	705	494	1	5	66	31	60	121	8	46	83	3
TMA20	264	766	474	0	1	70	31	34	68	3	18	65	0
BAR1	263	307	229	0	1	63	29	43	47	3	13	23	5
BDF2	263	509	376	2	2	62	23	55	151	11	46	82	8
TPM2	263	826	471	3	0	50	27	48	41	1	11	53	1
AGA2	262	384	287	0	2	66	26	52	34	0	8	17	0
HOG1	262	605	434	3	0	76	34	57	51	4	16	37	4
TNA1	262	514	324	5	1	100	38	88	92	4	31	50	3
YMR315W	262	906	635	0	2	61	31	53	50	2	22	13	3
FYV5	261	862	526	0	0	52	14	34	87	6	26	54	0
SRP21	261	863	448	1	4	66	24	37	92	5	28	64	1
GDI1	260	733	505	0	3	82	18	55	57	9	20	24	8
HTZ1	260	784	513	1	1	66	31	43	86	2	31	59	0
MDH1	260	1615	1029	3	4	76	35	80	136	7	44	34	1
OST2	260	742	485	11	3	68	30	48	52	4	22	56	1
COX12	259	1252	842	5	1	54	25	39	89	5	34	43	1
PHS1	259	589	363	0	1	78	22	52	45	1	20	47	0
DSK2	258	377	238	0	0	61	32	54	58	2	12	30	3
SDD2	257	1105	618	10	1	76	29	49	100	7	31	57	1
TIM17	257	779	483	0	2	73	29	62	83	3	33	80	0
ADE16	255	639	374	11	3	71	22	65	65	4	14	41	4
ADE3	255	636	462	2	3	81	31	78	62	2	17	38	18
GLO1	255	861	576	5	3	99	41	71	58	2	18	26	0
NCP1	255	600	401	0	1	72	26	62	52	6	18	47	7
NIP7	255	806	567	14	2	75	31	47	80	1	22	104	0
RPN7	255	740	463	3	4	50	28	59	71	6	24	37	3
SHP1	255	575	428	3	2	49	19	43	42	2	15	27	1
SRP1	254	574	388	8	1	69	37	45	43	0	14	33	3
EGO4	253	6195	4269	0	7	42	26	31	559	30	148	4	0
SEC63	253	608	406	8	0	67	27	81	56	1	21	43	0
ALA1	252	552	379	7	5	101	34	71	81	1	27	66	10
SSP120	252	812	450	4	2	85	40	79	117	3	33	59	1
SVF1	252	737	501	4	2	73	15	62	76	0	26	86	2
BAP3	251	703	465	1	7	76	36	57	81	4	15	38	6
ESF1	251	522	378	2	0	55	17	44	45	0	15	58	5
LSM1	251	687	422	0	1	59	22	51	50	1	12	44	1
RVB1	251	631	411	1	4	79	26	61	61	2	28	70	4
SFM1	251	781	530	7	5	85	22	56	65	3	8	69	3
SRP14	251	718	469	1	1	46	25	74	131	9	53	114	2
EMC4	250	776	560	0	1	54	24	62	92	2	26	43	1
HYR1	250	1035	631	1	4	50	37	56	66	4	35	43	0
VMA21	250	823	551	2	1	67	34	67	95	4	47	62	3
TRP5	249	648	431	7	3	84	28	48	52	4	20	33	8
AIM29	248	790	471	9	1	71	33	55	65	2	20	56	0
FOL2	248	1011	691	11	3	67	20	35	78	6	29	58	3
FUN12	248	518	343	5	7	82	27	88	64	7	26	68	8
GDA1	248	446	311	3	1	90	26	53	50	1	17	49	4
RPG1	248	636	479	1	3	59	30	68	109	6	29	84	8
TMA22	248	808	519	0	2	58	23	33	41	2	8	43	2
WWM1	248	754	423	6	1	57	25	61	44	4	13	66	2
YMR099C	248	746	498	6	2	79	35	45	76	5	19	51	2
ZPR1	248	397	292	2	1	68	44	56	29	1	16	47	3
TYE7	247	545	373	1	0	42	15	39	67	4	30	61	1
SEC62	246	616	441	1	4	49	27	34	32	2	14	45	2
ATG27	245	552	389	1	2	33	23	55	62	3	20	44	1
RER1	245	663	404	2	0	91	43	50	87	6	23	47	1
TCP1	245	557	288	2	3	83	31	58	63	7	19	67	4
HAP4	244	473	296	0	2	73	27	63	63	3	24	31	9
RPN11	244	798	512	3	5	54	19	30	78	4	34	33	1
VMA16	244	1081	852	11	6	266	103	133	159	7	49	122	4
VTC3	244	1452	953	14	4	60	28	66	137	6	67	105	8
AHA1	243	304	209	0	0	66	33	37	17	1	6	24	2
PRO2	243	684	377	2	1	85	20	54	38	4	12	46	4
PBI2	242	927	594	0	0	57	11	4	75	4	37	18	2
HRP1	241	729	438	2	1	78	32	68	103	8	36	69	1
MNN9	241	495	369	5	1	81	26	71	32	0	10	48	3
ORM2	241	526	298	0	0	79	25	20	43	1	20	27	0
UBA1	241	411	320	5	2	91	31	65	41	2	21	28	6
AYR1	240	1093	676	1	2	74	41	48	45	2	19	13	1
PHO86	240	930	622	2	0	68	19	53	109	0	32	78	4
GPD2	239	504	356	0	2	64	27	71	151	5	62	38	1
RPN12	239	909	587	0	0	81	29	56	58	1	18	52	0
ATP5	238	1222	792	7	2	69	38	40	98	5	27	74	0
CCT3	238	672	498	1	1	77	31	89	159	3	59	112	3
EMC1	237	476	324	0	1	55	18	39	53	4	14	55	7
FTR1	237	363	243	9	1	68	22	49	46	6	22	60	2
OST4	236	420	262	0	1	64	30	28	56	5	14	37	0
SLT2	236	535	371	2	0	64	17	45	43	2	15	20	2
URM1	236	539	363	3	2	69	34	49	65	2	30	62	1
FPR4	235	853	619	0	1	68	27	62	103	5	31	111	0
KTR1	235	647	438	4	1	134	43	89	111	5	60	53	4
PHO13	235	680	430	3	1	75	32	48	83	8	24	54	2
RPT3	235	724	520	1	1	55	21	45	51	2	17	49	0
SEC61	235	469	303	0	4	95	35	85	110	0	14	48	6
NAP1	234	720	470	2	0	59	29	50	43	3	16	39	4
PGM2	234	2369	1537	0	5	47	23	48	129	4	35	2	0
UBC7	234	636	448	0	0	45	27	29	48	2	16	30	0
ROT1	233	623	444	3	0	44	17	36	47	3	12	28	4
COQ5	232	823	541	2	0	83	35	71	142	5	56	49	1
IGO1	232	572	438	0	0	54	35	33	51	4	16	29	1
MNP1	232	867	576	4	3	69	23	40	54	3	18	33	0
URA4	232	792	525	0	2	82	27	46	59	3	7	85	0
YOS1	232	795	525	5	2	83	34	43	51	1	17	41	0
ARO8	231	774	549	7	0	96	36	71	128	5	56	66	6
DPM1	231	689	440	1	2	73	36	43	64	1	18	41	2
ERG13	231	627	434	0	2	120	31	47	76	5	23	48	6
SRV2	231	692	492	1	1	71	25	44	83	1	14	31	6
COM2	230	247	160	2	1	66	31	45	20	0	8	27	5
FSH1	230	788	543	16	2	50	34	33	59	1	14	88	2
PTC3	230	800	473	6	2	68	27	56	67	4	18	37	2
GET1	229	538	369	3	2	47	26	39	66	2	25	29	1
MNN10	229	556	382	4	0	75	17	49	41	3	19	51	1
NOP15	229	626	423	1	0	49	29	48	53	2	22	87	1
SIM1	229	550	353	0	4	121	36	84	138	7	49	60	5
ZWF1	229	593	435	0	0	74	28	51	92	3	32	20	5
RPT4	228	815	481	3	2	72	23	53	70	4	24	59	3
ERV29	227	543	297	1	1	93	37	64	54	1	13	25	2
MDH3	227	765	482	8	2	58	25	46	57	5	17	42	2
OAC1	227	318	221	3	0	58	24	51	41	3	14	55	3
ASP1	226	446	347	21	2	109	32	48	40	2	18	82	7
KTR3	226	593	374	1	3	80	24	67	32	3	14	47	3
QCR9	226	1396	995	2	3	81	30	43	116	13	41	45	1
TIM23	226	532	318	1	0	31	21	45	32	1	7	38	2
DLD3	225	805	540	3	2	65	33	59	81	6	17	16	7
SUR7	225	538	339	0	1	67	35	43	71	2	17	36	1
TIF4631	225	430	346	4	2	84	36	78	35	4	14	42	14
VPS74	224	770	497	4	3	62	28	47	73	8	29	44	1
CRS1	223	488	310	1	1	68	22	65	83	3	21	50	3
POL30	223	508	355	0	1	49	18	43	67	4	18	70	0
TUB3	223	520	358	5	1	66	7	11	49	4	36	29	1
ERO1	222	439	305	7	2	58	18	46	34	0	7	27	3
LOG1	222	773	470	2	1	56	15	43	94	2	26	43	0
SCP160	222	483	343	0	2	73	25	45	58	2	32	43	15
APD1	221	629	419	6	2	57	22	49	52	1	8	22	2
DPH5	221	625	350	1	0	79	29	57	43	2	7	56	1
TOM70	221	640	456	1	1	82	20	53	58	5	14	39	1
KES1	220	728	444	2	1	70	15	42	65	5	25	35	2
RUB1	220	714	497	6	3	56	42	51	60	2	14	42	0
YDC1	220	727	418	1	3	81	45	47	66	2	23	5	0
ALD5	219	665	438	2	2	64	16	32	57	2	35	43	7
ARC18	219	983	663	1	0	58	29	37	68	4	20	29	1
ARC35	219	763	517	2	0	73	21	41	107	4	12	48	2
CHO2	219	480	386	6	0	113	30	73	57	3	19	50	9
EXP1	219	628	336	6	2	54	26	53	43	2	10	51	1
GET4	218	619	374	3	0	47	28	61	47	4	8	37	1
LTP1	218	618	402	3	2	65	23	47	40	4	18	39	1
SPC3	218	776	514	0	0	70	22	42	73	5	33	33	0
ADE17	217	1624	1043	2	4	71	21	59	199	6	49	47	2
BFR1	217	775	540	1	2	63	32	51	59	0	17	31	3
BOL2	217	648	387	2	2	68	34	54	89	7	45	68	1
UIP3	217	570	361	0	1	55	25	54	42	1	16	19	0
RCF2	216	651	420	1	1	69	28	42	50	4	15	54	2
VPS1	216	602	397	0	2	56	19	44	61	3	20	44	3
EMC5	215	639	395	6	0	58	34	37	40	8	15	53	1
GSF2	215	869	558	4	4	89	53	86	142	9	65	63	3
IST2	215	491	319	0	1	73	20	57	83	3	24	39	4
MIS1	215	386	251	12	2	48	31	70	39	2	6	61	4
HAS1	214	405	277	1	1	47	18	51	48	4	13	57	3
NAT5	214	494	293	4	1	74	19	34	25	2	9	56	1
RPA34	214	510	308	4	2	61	25	44	57	3	20	94	1
ARL1	213	746	450	9	4	61	21	44	72	4	31	56	0
MRPS12	213	713	451	4	0	63	15	12	66	1	32	36	3
SEC21	213	603	387	5	3	41	23	56	49	2	20	46	7
SRP40	213	305	182	1	0	62	26	51	65	4	27	110	1
MNN2	212	450	288	1	3	58	27	47	47	4	14	34	3
ECM14	211	510	367	0	3	58	24	34	58	3	24	23	2
LSM4	211	545	374	1	0	44	17	25	34	0	10	32	1
MCA1	211	618	421	2	2	56	37	58	73	4	33	33	1
COX5B	210	1122	708	1	3	50	22	30	100	9	31	8	2
GSY1	210	949	631	0	3	42	19	33	91	6	29	1	1
ADE8	209	731	443	4	0	36	28	43	24	1	10	34	0
BUR6	209	579	361	0	0	36	12	28	63	5	29	38	1
SND2	209	658	436	2	3	87	40	58	135	5	51	110	2
GRE3	208	378	257	3	0	61	30	30	37	3	6	7	0
DEF1	207	319	211	1	2	50	17	37	83	3	41	32	4
NPC2	207	829	592	0	2	94	33	45	145	9	57	58	1
YJU3	207	502	327	2	2	55	35	37	39	0	11	32	3
AIM17	206	386	282	0	2	66	29	54	44	1	23	0	4
CSG2	206	552	306	0	2	83	33	59	69	10	48	23	2
DOT6	206	536	330	1	3	37	14	19	80	5	27	35	2
MAE1	206	236	178	3	0	43	23	44	27	2	16	55	8
OM14	206	847	577	0	1	35	16	33	116	14	27	15	1
UBP6	206	472	317	4	2	52	20	31	98	1	29	33	2
FAA1	205	589	354	7	2	73	33	76	62	6	18	22	1
PSG1	205	348	204	6	1	99	39	86	50	7	12	40	1
STE24	205	481	356	1	1	64	29	54	47	1	17	41	1
YHR138C	205	661	410	1	2	37	21	27	90	3	27	11	0
ATO3	204	124	96	0	0	87	28	65	17	1	5	25	0
COX6	204	1294	817	5	2	61	22	39	135	5	68	48	1
ERD2	204	438	260	9	2	93	34	63	50	6	20	37	0
HEK2	204	492	361	2	0	56	20	35	44	2	19	39	7
PHB1	204	695	454	2	2	60	42	59	182	7	62	50	2
SCW11	203	359	276	1	3	36	11	38	67	2	24	62	4
LYP1	202	490	296	7	5	51	24	45	53	4	10	29	1
RCK2	202	641	421	6	2	48	18	44	46	3	16	18	3
RLP24	202	653	425	0	3	38	27	29	33	0	10	62	2
RPT5	202	675	397	8	0	66	25	42	75	5	17	36	2
TED1	202	495	382	1	2	66	30	52	52	2	18	36	0
CAP2	201	651	494	0	1	54	19	40	34	1	13	16	2
FPR2	201	694	419	4	2	61	41	43	55	2	16	36	1
GNP1	201	389	265	1	1	62	25	46	62	2	14	39	4
GSY2	201	880	585	1	1	70	32	60	71	2	21	4	9
NMD3	201	435	290	7	0	65	23	43	45	2	13	77	8
RBD2	201	647	414	3	2	67	25	38	77	3	31	37	2
SOL3	201	539	365	2	0	68	29	48	52	3	10	46	1
VPS55	201	714	404	0	1	47	23	26	76	2	14	20	2
ARC40	200	815	559	0	0	66	27	40	62	4	24	37	1
HOC1	200	385	261	4	1	70	31	49	43	2	14	36	2
LSC1	200	827	560	1	1	56	17	29	52	4	22	29	1
LSM12	200	552	352	4	0	46	19	38	62	3	25	46	0
MSC7	200	360	247	1	0	51	22	32	65	4	23	20	0
NCB2	200	545	376	1	3	46	20	32	44	2	13	43	1
STE6	200	231	174	2	2	70	18	66	51	1	12	28	7
UBC1	200	611	360	3	4	51	18	51	54	5	20	41	1
MRI1	199	452	276	7	1	76	28	39	52	0	14	61	1
YBL028C	199	435	318	4	1	56	31	43	44	5	13	97	0
YPQ1	199	422	279	3	2	71	33	53	70	4	34	73	2
ASH1	198	340	254	0	1	38	23	34	55	0	14	13	6
DPL1	198	425	301	1	2	55	23	48	25	1	5	19	2
GRX3	198	534	323	2	0	70	23	46	35	3	13	38	3
LAG1	198	515	280	4	2	80	28	62	58	4	16	23	1
PHB2	198	753	451	0	2	52	33	51	69	2	22	33	4
TOM40	198	557	376	0	5	72	25	47	116	4	56	28	3
LCB1	197	439	304	0	0	61	27	51	85	3	24	33	3
NSG1	197	422	283	10	0	94	36	56	72	4	12	43	1
PAN5	197	486	317	1	0	51	22	33	53	2	7	34	1
SEC66	197	702	394	0	2	64	26	49	64	2	23	38	1
YAR1	197	375	253	1	3	50	21	43	27	2	11	51	1
COX17	196	632	446	0	4	33	20	16	52	4	20	19	0
RCN2	196	303	196	0	0	34	27	31	15	1	11	6	2
VTC2	196	830	525	9	2	62	19	49	104	2	19	55	5
YHM2	196	466	282	13	1	67	27	54	91	4	43	64	4
CRP1	195	327	233	0	0	48	20	42	61	7	35	42	4
KRR1	195	573	340	3	1	59	18	43	51	0	15	75	0
MUP1	195	1082	768	2	2	52	34	48	133	7	40	39	3
TAF9	195	451	304	0	0	40	22	34	28	2	6	25	0
THO1	195	627	479	0	2	51	19	23	56	2	22	26	0
VTC4	195	1003	686	6	8	76	37	67	114	7	40	62	8
GLR1	194	645	455	8	1	87	30	49	62	1	27	43	2
SEC17	194	660	443	3	0	62	24	23	35	6	18	21	0
SEC23	194	456	336	0	2	82	19	54	94	4	31	39	4
SSO2	194	504	331	1	3	46	32	45	78	3	32	35	1
STP3	194	428	267	0	1	29	17	23	49	1	14	28	2
DUT1	193	513	384	5	1	52	32	61	47	3	13	74	0
ETT1	193	475	325	3	1	57	16	47	70	2	24	49	1
PHO12	193	1502	1017	1	3	59	24	66	223	15	79	20	6
SAC1	193	492	310	6	2	62	25	59	37	2	12	21	3
SEC11	193	610	437	1	2	63	31	45	55	0	17	52	0
STE4	193	530	344	3	0	37	27	44	46	1	9	36	2
TIF6	193	598	375	1	1	84	39	56	86	6	29	89	1
ICY1	192	1118	710	2	1	34	20	30	62	6	24	16	0
RPB4	192	646	385	0	2	60	18	41	48	1	15	44	0
SEC27	192	523	395	7	0	69	30	57	55	1	16	29	10
CNB1	191	621	322	5	0	60	26	38	45	1	15	41	2
DCW1	191	509	305	3	1	52	18	40	47	2	13	32	0
ISD11	191	657	399	3	3	54	29	27	39	3	14	35	4
PDR16	191	468	268	2	0	42	15	34	64	2	20	53	1
RPA190	191	238	159	12	1	69	19	42	38	2	17	59	30
MAP2	190	719	429	3	2	55	17	50	73	2	27	35	0
RPC11	190	367	230	1	1	54	17	29	36	1	19	39	1
DBP5	189	489	363	8	4	54	35	47	67	2	20	61	3
ERG27	189	565	384	3	2	56	28	39	27	2	14	31	1
GCS1	189	440	272	2	0	62	25	44	33	1	11	42	0
HEM2	189	533	368	0	0	41	18	40	39	1	9	24	2
MDM35	189	841	582	1	0	42	24	43	116	9	41	30	1
NIT3	189	645	449	0	1	56	25	41	26	3	13	47	1
GGA2	188	486	311	1	1	35	15	33	42	4	14	30	3
NUG1	188	445	308	3	1	70	19	49	60	4	28	138	2
PDX3	188	787	473	1	0	49	26	27	53	4	22	36	1
PPN2	188	873	577	4	1	56	27	40	83	4	27	32	0
RPC19	188	492	335	1	1	53	35	39	59	3	26	87	1
THG1	188	533	354	1	2	50	15	8	23	1	12	29	1
CCP1	187	544	324	3	0	48	18	42	60	4	22	28	1
COX14	187	427	318	0	1	34	14	8	70	4	19	18	0
GAS3	187	359	210	1	1	77	20	51	50	4	27	39	2
GFA1	187	534	396	3	1	47	19	36	59	1	11	27	6
KSH1	187	614	360	3	1	60	29	49	73	2	32	48	0
PRY1	187	818	525	0	0	64	28	40	122	11	39	28	0
RPE1	187	431	302	2	3	83	26	65	67	3	20	58	4
TRM112	187	377	252	0	1	33	14	23	22	2	7	52	1
ATP20	186	1000	736	3	1	47	23	31	67	7	20	44	1
CDC3	186	492	311	0	3	39	19	29	72	1	17	30	1
CIC1	186	520	354	0	4	56	20	35	62	4	21	86	1
ISU1	186	503	311	0	4	45	17	35	44	4	9	52	5
TIM50	186	461	322	1	0	46	23	37	34	1	11	22	2
CIT2	185	247	127	1	0	42	10	26	22	1	9	7	7
CLU1	185	409	297	5	3	78	24	65	48	0	14	34	15
COP1	185	437	298	7	1	64	29	74	84	0	17	42	20
COR1	185	1182	731	2	5	64	22	53	108	3	30	56	1
DIC1	185	357	232	6	0	58	19	38	49	3	12	30	3
ERG1	185	466	321	3	1	69	27	75	118	17	44	62	4
HIS4	185	974	643	5	2	59	12	62	107	5	30	35	11
HSP78	185	375	241	1	2	47	18	34	27	0	11	4	3
RDI1	185	578	376	1	0	75	28	69	122	7	49	64	0
CGR1	184	523	287	2	2	39	20	33	56	2	20	63	0
ERV41	184	402	240	3	0	53	23	45	42	0	7	31	1
GIM3	184	679	435	3	1	59	26	32	46	2	24	47	0
MID2	184	300	203	0	3	43	8	29	46	3	14	26	0
RPA135	184	239	166	11	1	67	22	61	41	4	12	58	20
TPO4	184	324	235	0	0	52	25	51	66	2	37	4	1
COX9	183	858	641	5	1	74	34	42	102	2	16	56	0
GPI16	183	364	257	1	2	57	9	42	34	2	15	24	3
LYS20	183	342	245	0	2	48	21	19	32	4	15	35	3
SEC72	183	566	379	0	1	41	14	30	53	4	23	37	1
YPF1	183	367	307	0	2	47	19	40	39	1	11	20	1
AIM41	182	837	562	0	2	28	21	25	44	2	20	13	1
LYS21	182	460	319	0	2	40	17	28	52	1	8	25	2
NAT1	182	394	257	1	1	51	20	49	21	1	6	33	8
RNR1	182	330	250	2	1	67	21	45	32	4	13	56	11
YPR1	182	564	407	0	0	54	14	50	34	2	9	28	2
CKB2	181	548	361	2	0	53	18	39	31	5	13	26	2
CRN1	181	511	392	4	2	56	24	40	27	2	10	30	3
HEM12	181	382	232	1	1	55	20	42	38	1	12	36	1
NOP2	181	424	289	6	1	47	11	30	45	2	21	65	2
RPB7	181	556	367	1	1	43	19	26	49	1	16	43	1
SRP54	181	499	322	5	0	64	27	95	69	2	15	32	2
AAH1	180	291	218	8	0	76	18	55	34	3	11	110	4
BCP1	180	398	231	10	0	41	19	37	22	1	4	59	3
CDC10	180	600	386	2	0	46	21	35	52	2	13	30	1
PER33	180	378	272	0	0	53	13	35	42	1	26	32	0
RFA3	180	531	356	1	1	52	30	37	39	3	16	46	0
SLC1	180	429	283	0	0	77	17	30	41	2	9	25	1
SUS1	180	481	340	4	0	29	16	25	38	5	8	16	1
TIM13	180	568	378	0	1	42	17	42	36	3	22	33	1
CPR4	179	448	319	0	3	48	22	35	79	2	29	16	0
PIN3	179	335	202	0	0	55	21	26	55	2	16	15	2
PSE1	179	287	210	7	3	73	13	27	43	1	12	58	12
RPB11	179	730	495	0	2	50	19	33	49	2	13	37	0
MIA40	178	706	423	1	0	43	33	32	60	1	10	35	2
YBR016W	178	371	226	0	0	51	19	28	28	3	12	17	1
AIP1	177	486	297	0	1	44	17	38	73	3	8	27	0
AKR1	177	292	205	3	0	55	24	49	34	0	9	13	5
CBC2	177	736	478	1	4	60	20	40	74	3	15	78	2
LEU4	177	672	465	0	2	77	28	61	125	9	34	28	6
QCR6	177	1163	735	1	3	31	13	29	138	3	53	49	2
UBC9	177	365	268	2	0	36	17	25	29	0	12	31	2
YBL029C-A	177	341	187	1	0	29	20	25	24	0	10	12	0
CAJ1	176	612	391	1	3	52	12	50	39	1	7	38	2
CHS5	176	563	401	0	2	49	28	39	50	3	11	16	5
DAD4	176	277	211	4	2	31	20	14	34	3	18	26	0
DBP3	176	416	285	2	0	53	16	40	40	1	24	88	3
LSB3	176	360	261	3	1	40	18	30	51	2	15	9	1
PAM17	176	514	315	0	0	39	30	27	38	1	12	33	0
PRM5	176	291	193	0	0	57	16	27	22	1	10	18	2
SEC26	176	401	315	6	2	55	18	47	44	3	11	22	9
XRN1	176	321	223	2	4	70	19	67	40	1	18	28	29
ERG26	175	488	277	3	1	43	16	37	41	0	7	16	0
FUM1	175	490	357	0	5	58	23	41	64	1	17	29	0
PFD1	175	395	259	1	1	39	25	35	32	0	8	22	0
STE18	175	497	346	1	0	36	16	33	58	6	21	20	0
YOR343C-B	175	262	203	4	0	63	28	53	38	2	18	33	63
ISU2	174	300	238	0	1	29	20	26	23	0	9	35	0
RIB5	174	876	539	5	1	55	20	41	62	1	11	33	2
TIM9	174	351	251	2	1	47	27	30	27	0	7	11	1
ADE6	173	553	380	6	2	75	28	63	106	5	31	53	19
CHS1	173	327	203	0	0	59	21	66	55	3	21	16	7
EMP47	173	433	255	4	1	58	21	44	37	2	17	24	1
MTC1	173	464	306	1	1	53	13	36	35	0	14	32	3
NYV1	173	523	345	3	2	52	25	45	104	4	29	44	1
YPD1	173	461	265	0	1	39	16	22	37	1	17	34	0
NIF3	172	508	295	5	1	45	26	34	26	1	9	31	1
PTM1	172	560	404	1	0	60	23	49	45	0	12	32	2
APQ12	171	537	316	1	2	48	22	28	59	4	22	32	2
COS6	171	468	274	2	1	77	33	53	68	1	15	28	3
COX4	171	1261	842	3	5	59	19	44	193	8	74	46	0
SAM2	171	932	672	0	3	49	22	52	93	3	34	44	1
SMI1	171	445	333	2	1	32	21	43	30	1	16	42	0
TAF14	171	587	368	1	5	56	21	40	53	2	12	48	0
CUE1	170	489	317	9	0	47	15	29	61	2	18	35	3
PDX1	170	440	266	0	1	32	19	25	28	2	13	28	0
RPA49	170	397	254	3	1	42	17	57	58	0	15	67	5
TPA1	170	284	171	5	0	43	13	37	37	1	9	57	4
YDL012C	170	444	270	0	0	33	24	23	33	1	12	21	0
DRE2	169	372	258	1	0	57	20	31	27	4	11	34	1
HIP1	169	301	184	2	1	69	21	45	37	0	11	45	2
NEW1	169	402	293	3	1	83	31	59	50	3	15	57	14
PBP1	169	348	210	8	0	44	20	46	29	0	10	19	4
RSM19	169	370	244	0	1	44	14	30	35	1	10	16	1
SEC65	169	473	311	2	1	40	13	24	48	3	16	36	0
TOM20	169	456	314	1	0	56	13	25	43	4	25	38	1
GLO3	168	424	265	3	2	73	26	55	61	3	32	54	1
LAP2	168	481	347	1	1	53	22	36	37	1	6	27	3
RAD23	168	419	261	1	1	59	20	44	57	6	25	58	3
YNL190W	168	444	278	0	10	200	76	158	383	19	182	52	7
HHO1	167	459	317	0	1	42	9	29	62	2	21	51	1
KAP123	167	212	168	1	1	62	31	46	54	2	16	44	13
MGR2	167	350	217	3	2	36	14	26	26	4	4	28	0
YCK1	167	395	241	0	2	40	13	24	49	0	10	44	1
ANP1	166	335	223	2	1	34	11	30	20	0	10	33	4
HRR25	166	512	373	1	1	29	12	31	36	1	20	49	3
PCM1	166	434	292	8	0	48	25	41	32	3	7	23	3
SNQ2	166	139	113	2	1	63	26	58	25	1	9	44	15
MXR1	165	1015	697	1	1	40	17	38	93	6	15	31	0
SPF1	165	352	233	0	0	85	25	63	38	4	11	35	10
TFS1	165	695	475	2	2	32	17	17	58	3	25	3	2
YARCTyA1-1	165	212	144	1	2	28	10	23	15	0	9	6	56
MKT1	164	462	310	1	3	49	10	49	48	1	9	20	9
QCR2	164	807	545	1	5	40	15	33	98	4	24	27	2
SVP26	164	346	273	0	1	67	17	28	27	1	2	16	1
DFG5	163	435	293	6	1	42	15	27	54	1	10	25	2
LSM3	162	428	281	4	0	32	16	34	70	2	27	46	0
MKC7	162	158	101	0	0	49	8	32	26	1	8	33	4
PPN1	162	404	288	0	2	65	15	60	51	3	15	26	5
RLI1	162	348	215	0	1	56	16	40	64	8	25	55	2
RPA12	162	380	263	0	0	35	8	23	36	1	12	65	1
RPB2	162	359	265	3	3	59	18	53	47	1	12	35	10
SNF4	162	506	308	2	0	54	27	30	31	0	16	31	2
TPD3	162	569	418	1	1	60	20	57	47	2	15	25	1
YBR056W	162	521	357	1	0	61	14	32	58	5	8	6	2
CAP1	161	778	499	1	1	59	34	46	45	2	13	20	1
CUZ1	161	472	298	3	1	37	15	46	48	0	15	33	0
ERG28	161	1193	743	0	3	24	20	16	97	2	33	21	0
GCD1	161	398	276	0	0	47	16	24	36	2	11	34	7
HAM1	161	414	244	0	1	36	18	24	28	1	7	28	0
ILM1	161	453	316	1	2	59	29	36	50	3	10	15	0
MCM1	161	287	200	0	0	30	12	33	49	5	25	39	0
MDY2	161	378	244	0	5	46	22	35	20	0	9	18	0
PHO8	161	738	497	2	0	63	25	46	74	4	33	21	3
BEM2	160	204	102	4	1	45	20	36	23	1	8	18	15
CDC37	160	454	311	3	1	48	21	73	115	2	32	54	2
GPP2	160	883	569	0	1	69	25	24	61	3	14	16	3
MNN5	160	292	158	7	0	65	17	50	35	2	17	28	1
YKE2	160	558	352	0	0	29	10	14	35	3	9	29	0
MRP2	159	516	351	1	1	55	27	31	44	2	8	33	1
POM33	159	490	271	0	1	49	14	28	86	4	37	20	0
PPH21	159	562	352	0	4	63	18	32	37	3	11	39	2
RCR1	159	240	157	0	0	38	16	24	36	3	12	6	0
RIE1	159	337	227	4	2	49	21	53	54	1	16	28	4
SCD6	159	491	304	0	0	39	14	26	47	3	20	34	1
SFB3	159	297	218	3	1	53	16	35	32	3	13	23	4
SSO1	159	541	375	0	0	42	23	17	35	1	12	34	0
YIP4	159	502	350	4	3	33	22	18	23	1	10	22	3
YPS7	159	241	162	1	1	37	9	22	18	2	7	17	2
HIS3	158	636	433	2	2	36	17	26	57	3	17	34	0
MPC1	158	560	361	1	0	32	10	31	61	4	13	21	0
TRM82	158	347	216	0	0	39	23	34	33	1	11	60	1
UBC6	158	439	328	1	1	44	18	40	66	4	17	38	2
CPR2	157	511	302	1	0	40	14	22	33	1	8	27	1
EMG1	157	434	313	3	2	45	23	34	19	2	10	54	2
FIT3	157	95	73	0	1	50	15	26	20	0	8	11	3
GAD1	157	387	228	0	0	37	16	28	52	4	15	1	0
MSC1	157	757	526	0	4	36	24	28	60	2	18	2	0
CPA1	156	271	211	1	2	31	20	37	19	0	9	47	3
JIP5	156	322	236	0	1	32	18	30	18	1	6	30	0
MRX14	156	509	334	3	0	23	19	27	33	4	7	17	0
RET2	156	327	225	2	0	37	23	39	39	5	17	27	6
SEC22	156	470	307	0	1	49	12	34	43	4	6	24	0
SHE10	156	359	259	0	4	41	16	41	27	1	10	20	3
SRP68	156	445	310	9	0	46	20	28	44	2	13	48	1
YBT1	156	240	182	4	0	49	13	33	13	1	9	13	13
ACL4	155	275	171	6	0	48	18	27	24	1	6	39	1
ALE1	155	513	325	0	5	52	22	26	54	0	22	27	2
BCY1	155	504	342	0	0	49	15	29	54	3	13	15	0
ELF1	155	892	511	0	1	32	18	27	55	2	29	43	1
END3	155	631	451	1	1	55	22	34	44	2	18	23	1
HAL5	155	226	182	0	0	44	11	33	38	0	8	8	1
LDB7	155	412	287	7	0	31	14	27	23	2	9	23	1
NSP1	155	268	176	0	1	30	12	30	19	0	7	20	2
RPB3	155	402	267	3	0	31	22	21	23	3	9	36	3
SFT1	155	316	235	2	1	29	11	18	25	2	9	25	2
SWS2	155	486	284	0	2	35	17	23	38	1	13	22	0
TCB2	155	234	194	3	1	48	20	51	21	2	12	24	2
UBC13	155	459	328	0	0	47	21	27	49	3	7	34	1
YPR148C	155	459	312	0	0	47	30	33	25	2	9	16	0
ARD1	154	421	289	1	1	37	22	29	19	0	6	34	3
ARO3	154	978	815	1	1	47	19	36	90	5	44	27	2
EMP70	154	318	250	9	0	86	33	72	73	3	33	38	5
GCD7	154	237	187	2	3	42	22	42	20	3	4	20	1
MYO2	154	256	150	2	0	55	10	59	50	3	14	53	7
SCS3	154	272	169	2	0	50	6	12	14	0	10	11	1
ABP1	153	363	264	1	1	43	16	36	40	0	10	17	4
CSE1	153	335	233	1	3	52	19	38	20	1	5	24	1
DAD1	153	468	335	4	0	43	12	18	27	6	10	26	0
ESS1	153	474	297	1	0	33	20	31	33	1	16	25	2
GCN20	153	483	331	11	3	51	35	40	34	2	14	35	9
NTH1	153	536	370	0	1	53	23	50	52	1	13	6	6
PTH2	153	417	248	1	0	36	22	33	31	1	11	29	0
EMC6	152	495	316	4	3	94	37	42	69	9	27	37	0
KTR6	152	297	196	3	1	42	19	43	35	0	14	31	1
TVP23	152	450	275	0	0	41	19	20	45	1	11	20	0
YGR054W	152	236	157	0	3	40	19	29	42	3	12	39	1
CKA2	151	515	358	0	1	31	20	31	42	2	14	39	1
DTD1	151	360	265	3	1	44	21	37	37	1	8	33	0
GRH1	151	396	291	1	0	47	26	26	39	1	7	18	3
IPT1	151	278	173	2	2	43	25	32	40	1	13	41	1
MDH2	151	830	532	0	3	19	17	14	59	1	21	65	2
RAD6	151	478	287	2	1	25	10	18	32	3	8	30	1
TYW1	151	259	201	4	0	42	10	43	26	2	5	34	1
CWH41	150	296	212	0	1	55	16	50	23	0	11	17	2
ERG24	150	346	220	1	1	56	26	31	44	3	10	21	2
FCF1	150	479	319	0	2	49	19	20	26	0	8	42	1
LSO2	150	547	362	1	1	34	15	27	37	0	14	33	0
SQT1	150	331	181	5	0	25	11	37	60	4	27	83	2
ALD4	149	732	496	2	2	58	26	43	64	3	17	9	0
HAP1	149	230	174	3	1	33	16	36	18	2	10	27	9
PRX1	149	593	401	0	0	34	25	21	70	4	17	11	0
RBG1	149	261	157	4	0	46	14	59	93	4	24	132	3
RBL2	149	469	287	0	1	40	17	30	35	2	12	24	0
RDL2	149	550	335	0	0	38	15	31	47	3	18	25	0
RHO5	149	339	217	0	0	17	14	27	38	1	16	17	0
TIM21	149	324	219	0	0	40	14	34	19	2	6	26	1
TRP2	149	497	339	2	1	80	32	49	32	0	12	32	1
ALO1	148	353	261	0	0	38	24	39	34	2	18	37	2
AVT1	148	303	221	9	3	47	19	31	33	8	6	37	2
CIR1	148	419	297	0	1	29	17	21	35	2	7	12	0
GET2	148	335	254	0	1	45	17	22	35	1	11	19	0
SHM1	148	397	282	5	3	70	39	57	26	1	11	22	4
SRP72	148	401	267	3	1	42	19	42	22	1	16	42	1
YIF1	148	316	185	3	1	39	17	30	48	1	11	25	0
ATX1	147	569	375	6	0	47	25	26	54	5	14	29	1
GRX5	147	495	305	0	0	43	22	25	57	3	17	45	0
LAC1	147	497	319	1	1	91	28	63	56	4	17	35	2
LEU9	147	335	238	2	1	82	20	49	50	7	18	39	3
MIT1	147	172	112	0	1	39	10	23	19	2	6	15	1
ROQ1	147	122	103	0	1	27	15	18	15	2	7	0	0
SEC24	147	325	268	1	0	62	19	64	93	3	38	33	6
SER2	147	372	216	1	1	45	14	28	49	2	10	38	1
SRP102	147	367	221	6	0	32	14	18	30	0	4	28	0
YIP1	147	348	218	1	0	48	12	26	33	1	10	28	0
YIP5	147	507	324	1	1	43	16	41	72	9	33	31	2
ITR2	146	318	217	4	0	40	21	27	35	1	15	20	9
MIR1	146	772	565	0	5	86	31	68	89	9	46	56	3
MRPL50	146	480	308	0	3	35	19	26	23	5	7	17	0
MTR2	146	349	195	0	1	32	19	25	31	1	11	27	1
PLB3	146	257	203	0	1	41	18	39	36	2	10	25	7
RKI1	146	376	210	4	2	57	29	56	35	2	14	64	2
SLG1	146	346	265	0	0	59	21	40	44	2	9	35	0
VPS21	146	578	338	2	2	51	16	36	83	5	37	47	0
DAP2	145	373	287	1	1	42	19	60	42	3	17	19	2
DRS1	145	178	146	6	1	42	19	37	31	1	7	41	5
DYN2	145	454	350	4	0	30	13	23	37	1	18	32	0
ENV9	145	329	222	7	0	36	27	34	42	0	19	72	2
GIR2	145	375	249	0	0	40	15	27	31	0	15	27	0
MGM101	145	462	313	7	1	20	12	15	26	1	11	24	1
MRPL51	145	528	322	3	1	32	11	23	73	1	16	24	2
NFU1	145	459	277	1	0	42	15	33	31	3	7	26	1
RHO3	145	434	293	4	1	37	22	33	43	1	7	51	1
COA2	144	388	267	1	1	30	12	37	56	4	7	15	2
HMT1	144	584	364	2	2	40	21	28	50	4	10	97	0
NUP2	144	249	176	1	0	27	13	30	18	1	5	34	1
PAM16	144	437	261	0	0	33	17	23	34	3	12	34	4
ZRT2	144	638	431	4	2	46	18	34	83	2	25	27	1
ABP140	143	335	240	1	1	45	19	35	38	2	13	30	2
ADP1	143	321	238	5	1	54	21	38	35	1	7	11	6
DAP1	143	719	440	1	3	22	7	27	99	7	41	26	0
FLC1	143	365	279	2	2	41	13	32	44	3	14	19	5
HOT13	143	368	239	1	1	29	11	18	48	1	13	19	0
NOP6	143	433	242	1	0	35	14	22	51	4	19	64	0
QDR2	143	512	370	1	5	51	28	42	79	3	24	18	2
RPA43	143	295	205	5	1	40	20	35	25	1	11	45	1
RPB9	143	462	275	4	3	37	19	34	58	3	27	34	0
RVB2	143	465	282	4	0	49	12	30	47	3	10	42	2
SRM1	143	296	171	1	0	46	18	37	36	2	9	42	1
TOA2	143	492	340	7	1	52	25	29	56	4	28	37	0
CDC12	142	412	257	2	0	31	9	26	45	0	16	45	3
CWH43	142	295	198	2	0	48	23	42	49	2	18	21	6
DIM1	142	331	215	6	1	42	16	34	25	0	6	59	1
GSH2	142	402	294	2	2	52	13	37	31	4	7	25	3
RSA3	142	379	229	1	0	29	15	27	22	0	4	35	0
YAK1	142	210	163	0	0	26	22	21	29	0	5	5	2
YPT52	142	558	384	1	1	49	11	15	69	1	14	27	1
APE2	141	365	230	4	2	18	17	38	27	0	8	14	5
CKB1	141	436	309	2	0	35	12	22	51	0	20	42	2
EFM5	141	405	268	1	1	39	15	33	41	1	10	42	1
GIM5	141	363	259	0	0	44	20	28	37	2	14	41	0
MRPL39	141	621	359	2	1	42	15	28	45	5	15	19	0
NPA3	141	335	256	5	1	19	20	25	7	0	6	31	0
PKR1	141	397	245	0	1	60	32	34	52	1	14	50	1
RRP5	141	262	152	5	2	67	19	40	32	2	14	53	24
SLA1	141	372	251	0	0	46	19	48	46	0	20	18	7
YNL134C	141	390	296	1	1	47	13	37	28	1	6	7	0
BDH1	140	587	388	1	1	36	16	27	89	3	26	11	3
ECT1	140	360	217	0	0	33	14	24	34	1	6	14	2
FRQ1	140	432	280	1	2	36	19	28	68	5	21	28	2
GLO2	140	421	281	3	1	36	23	39	33	0	10	32	1
OST6	140	293	202	1	0	66	9	27	23	0	5	37	0
RRP7	140	451	367	0	1	33	18	29	44	3	10	57	2
ERP5	139	400	285	2	0	28	16	23	26	0	17	27	2
PRD1	139	448	361	1	0	56	22	39	27	1	8	15	4
SYH1	139	327	219	0	1	39	17	24	36	0	10	30	2
YPK1	139	525	334	4	1	49	26	49	53	1	10	22	0
AIM45	138	426	299	2	0	41	14	33	63	4	31	38	3
AIM9	138	398	290	0	1	43	20	26	29	2	17	21	2
BOL1	138	385	266	0	3	34	16	12	27	2	9	18	0
EMC2	138	418	218	4	0	39	15	29	47	0	12	34	1
ENB1	138	213	167	0	0	53	12	36	16	0	1	9	4
KRE6	138	299	224	4	3	68	33	57	37	4	20	25	8
LYS9	138	377	254	6	2	53	21	29	28	2	4	19	3
MNN11	138	371	227	7	3	38	11	34	35	1	16	38	1
OPI3	138	545	387	0	0	38	20	27	24	1	8	10	1
PNO1	138	406	300	2	0	42	26	37	35	2	13	68	2
SPT5	138	193	181	3	0	41	13	43	51	0	20	34	9
YMR027W	138	406	277	1	0	47	17	38	51	2	9	31	0
YPT6	138	505	312	4	4	33	18	21	50	0	13	20	0
YTM1	138	231	136	7	2	35	12	21	15	1	4	54	5
AIM6	137	486	319	1	3	45	21	36	27	1	10	21	1
DAK1	137	378	242	0	3	34	23	33	23	2	10	14	2
EXG2	137	274	176	0	1	30	7	28	22	0	5	21	1
MDJ1	137	229	166	0	0	26	15	23	24	1	3	13	3
NIP1	137	405	266	5	4	51	25	54	75	4	19	52	6
NOG2	137	296	199	209	21	51	16	35	69	11	46	114	71
SDD3	137	264	215	3	0	47	16	46	41	2	16	31	3
SEC18	137	337	221	0	0	31	13	26	31	0	8	18	2
SPC2	137	398	276	1	0	28	20	34	27	2	11	26	0
TCB1	137	354	244	2	2	42	19	35	52	4	17	13	4
LOC1	136	399	239	0	1	38	15	35	64	2	23	68	2
MRPL9	136	355	247	2	1	25	11	21	36	0	6	29	1
PPX1	136	356	209	0	1	34	19	35	82	2	19	58	1
RIP1	136	696	428	0	1	22	15	27	70	4	25	19	0
RPF2	136	406	291	2	1	41	16	20	41	2	11	80	1
ARX1	135	239	187	11	1	29	14	27	38	0	9	87	4
CUB1	135	417	272	2	0	39	10	23	39	1	17	9	1
FIT2	135	136	99	0	0	28	16	18	13	2	6	18	0
GRX7	135	311	206	0	1	41	19	26	31	0	4	20	1
HST2	135	296	191	1	2	31	19	23	21	0	6	19	1
PEP1	135	253	201	4	0	45	15	47	31	2	13	20	7
RTS1	135	480	360	0	0	40	19	34	37	2	11	22	5
SEH1	135	378	235	5	0	30	14	28	38	2	6	24	2
SFH5	135	304	193	0	0	34	16	24	22	1	6	22	0
SFK1	135	164	102	0	0	43	16	26	21	0	7	16	1
TFG1	135	350	228	2	1	40	13	23	43	3	10	17	3
UTR4	135	341	236	2	0	16	10	19	45	6	26	32	2
ARP9	134	397	251	1	0	27	18	27	33	1	8	15	0
CPT1	134	299	170	1	1	64	24	46	30	0	11	27	2
FMP52	134	350	241	3	0	67	31	41	47	3	21	25	2
NCL1	134	292	194	0	3	36	16	34	26	3	1	26	3
NOP16	134	507	317	1	0	34	18	35	44	2	23	59	0
PUS7	134	386	267	1	2	39	21	37	32	3	7	26	2
SER33	134	883	581	2	2	50	13	33	75	5	24	33	1
SRP101	134	303	218	1	1	29	14	34	24	1	7	24	2
TRM8	134	253	147	0	0	28	13	20	13	1	3	30	0
YNR061C	134	317	200	2	2	40	20	28	22	2	6	29	1
GCN3	133	315	225	7	0	30	10	25	35	0	5	36	0
KGD2	133	702	492	1	2	41	22	32	69	4	25	21	3
LST8	133	265	165	2	2	30	10	21	12	2	7	13	0
MVD1	133	438	260	3	0	60	28	43	68	1	16	46	3
NNT1	133	359	249	3	0	27	13	28	36	1	10	41	0
PAM18	133	413	242	1	1	34	22	22	22	1	4	40	1
RSN1	133	267	205	2	0	64	17	56	24	1	9	26	6
AIM7	132	508	348	0	3	29	27	31	47	1	13	24	2
FPY1	132	481	297	4	1	35	16	17	23	0	7	9	1
HEM13	132	1286	917	0	4	42	19	33	224	10	103	17	1
HIS5	132	501	322	0	2	38	15	18	68	0	22	26	2
MAK31	132	408	242	4	0	33	11	20	16	2	13	13	0
STO1	132	321	221	1	1	40	22	35	30	0	10	14	3
TOH1	132	398	238	4	0	73	16	38	65	0	24	15	5
TSR2	132	310	190	1	0	40	13	22	19	1	5	39	2
VCX1	132	337	229	3	2	57	23	42	79	2	19	18	0
CMS1	131	242	181	2	0	27	14	17	27	2	13	45	0
DGK1	131	377	236	4	0	33	18	26	31	3	11	33	2
DPP1	131	484	302	0	0	41	20	28	33	3	14	15	1
ENT2	131	343	237	0	1	31	13	29	67	4	24	17	2
GNA1	131	293	160	2	0	37	10	23	31	1	4	17	1
GOT1	131	349	245	2	1	64	37	47	62	3	35	40	1
KEI1	131	318	220	0	0	25	20	20	23	2	9	33	0
MIC27	131	348	235	1	2	30	10	19	36	1	8	22	0
PMU1	131	356	241	4	3	43	18	24	36	4	5	20	2
SFT2	131	461	275	3	2	40	11	22	41	4	18	21	0
YFH1	131	333	220	0	0	29	10	29	19	2	12	17	0
BUD20	130	427	267	1	1	31	21	30	38	0	8	54	1
MDE1	130	288	175	3	0	27	8	29	53	8	35	30	1
MPD2	130	282	161	2	0	29	15	28	13	1	7	14	1
MRPS18	130	420	289	0	0	42	16	27	69	4	24	40	3
MRS6	130	292	224	4	1	46	12	31	31	0	13	40	3
NSA2	130	480	292	5	2	56	25	42	30	0	5	55	3
OXA1	130	226	146	1	1	18	10	19	6	0	2	21	1
PHM8	130	590	377	0	2	23	10	17	61	2	12	7	0
SDA1	130	253	137	5	0	34	9	28	27	2	7	39	3
TOM71	130	305	219	1	0	25	10	20	21	1	10	20	3
YER134C	130	436	273	0	2	35	12	29	29	2	9	12	1
ALG6	129	339	209	3	0	49	12	32	30	0	8	19	3
CAB5	129	367	230	1	1	31	15	20	18	2	4	13	0
MRPL13	129	301	199	1	0	31	15	26	20	3	12	22	0
MRPL31	129	467	286	0	1	30	8	19	57	2	17	25	0
NMT1	129	329	201	3	2	25	10	25	23	1	6	30	1
NOT5	129	311	233	0	0	22	13	22	12	2	7	16	2
PAM1	129	258	228	1	1	26	18	23	33	0	18	9	3
BRE1	128	267	173	2	1	31	10	15	20	1	3	18	3
COS3	128	290	221	3	3	63	24	43	60	1	10	10	0
CUE5	128	330	237	0	1	28	21	28	24	2	2	12	2
GCD6	128	274	176	3	0	53	10	31	31	2	12	39	6
GLC3	128	758	505	0	2	46	16	30	74	6	15	1	2
GNT1	128	253	200	1	0	29	13	34	23	0	5	23	3
GPI17	128	298	222	0	0	32	12	25	18	2	12	34	2
MRP10	128	481	324	1	0	27	15	16	42	0	16	26	0
PCL5	128	630	385	1	2	25	22	35	105	7	48	26	2
RAS1	128	286	189	0	0	35	21	24	19	0	4	40	0
RBG2	128	209	136	2	2	33	11	20	9	0	5	20	1
URE2	128	329	226	0	1	45	18	32	26	2	11	29	2
CHS7	127	267	160	3	1	49	18	18	19	3	10	20	1
ETR1	127	493	323	1	1	35	12	35	49	0	12	5	0
NCE103	127	306	198	0	1	35	12	19	36	2	12	18	0
PMC1	127	288	212	4	1	41	18	40	33	1	11	10	3
RNQ1	127	265	190	1	1	32	20	32	44	3	18	32	2
SCJ1	127	229	131	4	0	30	12	11	27	0	5	31	1
SNL1	127	454	291	1	1	16	13	16	21	3	10	27	0
URA7	127	214	151	10	0	56	36	81	87	3	38	118	9
YBL036C	127	356	228	3	1	43	12	28	59	3	31	59	4
CAB1	126	328	203	2	0	47	13	26	31	3	5	20	1
CTR2	126	399	223	0	0	39	15	29	52	2	9	36	0
DST1	126	254	186	0	0	43	10	33	12	0	6	17	2
EHT1	126	303	204	0	2	51	20	16	26	2	5	19	0
ENT3	126	408	298	2	1	26	9	29	36	0	7	22	3
GPA1	126	337	186	1	2	34	10	36	27	0	5	30	5
NOP13	126	277	186	0	0	39	15	33	14	0	5	42	2
PUF6	126	297	195	3	1	29	16	21	25	0	9	56	3
PWP1	126	295	224	2	0	31	18	38	30	1	9	81	2
REE1	126	487	340	0	2	35	14	22	56	1	10	27	2
TRM1	126	207	119	6	1	25	13	39	18	0	13	35	1
YOR342C	126	319	203	0	2	21	11	20	41	3	7	55	1
ALB1	125	423	272	3	0	41	14	23	33	0	11	93	1
DID2	125	515	327	1	0	17	9	17	38	0	20	16	1
LOA1	125	273	166	0	0	25	13	20	26	0	5	19	0
LRP1	125	372	260	1	0	31	13	26	46	2	15	49	1
MRPL23	125	441	266	0	2	31	14	29	30	0	13	12	1
MTD1	125	989	627	0	1	32	18	28	84	4	32	38	2
NAN1	125	207	134	6	1	35	9	21	18	4	3	41	11
PRS5	125	340	223	10	0	55	17	45	41	5	16	47	2
RRP1	125	246	173	5	0	27	10	31	19	0	6	46	0
APL5	124	233	140	1	1	39	7	24	26	1	10	21	1
HRB1	124	340	187	0	0	22	12	26	53	2	14	34	0
MTR4	124	178	128	11	0	44	7	23	22	0	6	43	3
OPI10	124	149	78	0	0	24	9	15	16	1	1	2	1
PAL2	124	228	176	0	0	19	10	19	22	3	13	10	0
RMT2	124	275	157	4	1	48	15	32	35	3	11	44	3
SAM35	124	366	225	1	0	41	19	26	19	2	4	27	1
TAE1	124	241	150	0	1	29	9	17	15	0	4	13	1
YBR137W	124	339	244	3	2	31	14	24	38	1	8	14	0
YGR130C	124	469	321	0	2	28	14	13	54	2	11	11	2
BDF1	123	313	227	3	1	25	10	33	42	2	17	25	5
BNA6	123	363	250	1	0	29	17	32	19	2	6	21	1
CRM1	123	311	263	4	0	53	16	47	39	1	6	36	9
DCP2	123	219	171	1	1	33	19	31	16	2	0	24	4
FPS1	123	293	188	0	2	45	22	54	54	3	8	36	4
PGC1	123	323	193	0	0	22	9	19	37	4	8	21	2
PHO91	123	208	135	0	0	41	9	23	25	1	5	19	4
BSD2	122	295	182	0	0	27	8	16	23	0	10	16	0
DID4	122	524	337	1	0	33	10	34	32	1	4	24	1
ERG8	122	311	185	2	0	42	12	24	18	1	3	21	0
PAN6	122	431	237	4	0	46	11	21	47	0	15	33	1
SNX3	122	286	186	1	1	33	15	25	35	2	9	13	2
TRP3	122	317	242	4	1	43	14	27	27	1	1	23	2
YJL068C	122	405	265	2	2	36	14	21	37	0	15	22	0
YPK2	122	239	159	1	0	23	8	25	16	2	2	1	4
AIM46	121	241	207	0	1	29	12	21	22	0	3	15	0
ATG42	121	393	234	0	1	29	14	29	35	2	9	3	2
BUD5	121	284	188	5	0	26	18	11	13	2	7	11	0
DSD1	121	283	195	1	1	27	20	16	24	1	10	12	0
HST1	121	294	178	0	1	31	9	33	50	3	13	25	4
IGO2	121	549	341	0	0	45	23	25	46	1	8	21	1
MRPL49	121	384	245	6	0	24	18	17	15	0	6	14	0
NAB6	121	295	228	0	4	40	13	35	18	1	7	20	6
OCA2	121	359	246	0	0	25	18	24	17	2	7	16	2
RAM2	121	350	201	1	0	40	15	12	27	1	6	26	2
SDH4	121	618	442	0	3	40	18	23	112	23	94	14	1
TAF10	121	391	210	3	2	32	13	25	44	1	6	26	0
TVP15	121	453	316	0	0	37	18	32	30	2	8	20	1
AVT7	120	497	327	1	0	36	15	28	32	3	13	13	1
DBP9	120	303	218	2	1	29	14	24	29	0	5	50	7
DIG1	120	264	175	0	0	29	13	31	33	1	11	26	1
EIS1	120	343	260	1	0	29	14	35	79	4	21	13	5
PLB1	120	367	274	0	1	39	15	19	37	0	10	11	2
PRP43	120	277	164	1	1	44	12	38	32	2	7	52	0
RFA2	120	292	214	5	0	38	12	24	18	1	6	34	1
SDH2	120	647	409	0	4	19	13	21	89	1	31	12	0
STF1	120	984	621	0	2	20	13	22	81	5	34	1	1
SXM1	120	207	149	3	0	49	10	40	33	0	10	24	6
FLC2	119	263	166	0	0	36	10	30	29	1	8	10	3
HIS7	119	303	217	3	0	27	9	49	55	1	9	26	1
MEU1	119	265	166	6	0	45	16	30	25	1	7	49	2
NOC2	119	278	181	2	0	46	17	35	38	0	9	70	3
NUP57	119	271	184	5	1	27	21	28	46	2	11	34	0
SDO1	119	326	207	2	0	29	17	21	18	1	2	28	1
SPO12	119	394	238	0	1	33	12	29	37	2	14	29	0
TIM44	119	347	237	2	1	26	18	26	24	1	6	19	1
TUM1	119	317	211	1	2	36	10	34	20	4	3	27	3
YRB2	119	363	247	0	0	34	10	28	38	1	14	26	0
APS1	118	344	200	0	1	27	14	26	44	5	14	23	0
CYB5	118	432	288	0	2	35	14	28	38	2	18	45	3
KAP104	118	187	136	1	1	31	10	35	22	2	6	32	5
MMS2	118	340	214	0	0	24	11	22	13	2	2	15	0
MRP17	118	365	218	1	2	27	16	15	25	1	9	13	0
MRPL38	118	450	263	0	0	27	10	15	47	0	21	11	0
PEX2	118	268	179	1	1	24	15	16	27	1	7	18	1
RNA14	118	228	158	2	0	22	9	25	16	0	9	24	3
SDS24	118	383	243	0	2	34	10	16	40	1	17	1	1
SSE2	118	304	203	2	1	20	5	24	25	2	5	4	0
TRS33	118	292	201	3	1	31	16	24	17	1	4	9	2
VPS70	118	295	206	2	0	35	9	26	37	0	15	13	0
ARI1	117	355	233	0	0	58	15	40	20	0	8	16	0
CMC1	117	293	184	2	0	41	16	17	31	1	4	17	0
CNL1	117	338	219	1	0	28	12	27	30	0	11	17	1
FRD1	117	410	239	2	0	53	22	41	70	4	23	24	1
HOM3	117	440	285	0	2	36	12	28	66	8	17	27	5
IZH2	117	1005	650	7	7	37	18	22	163	6	65	38	3
MIM2	117	266	176	0	1	29	20	35	26	1	8	22	2
MPP10	117	262	215	9	0	25	14	36	21	2	8	45	1
PRO1	117	233	178	3	0	34	11	40	20	2	7	30	2
SIC1	117	289	201	1	0	30	16	19	28	2	9	18	0
SLA2	117	301	181	0	1	34	17	31	42	3	17	16	2
UTP9	117	259	156	2	2	26	16	23	27	1	13	61	2
WHI2	117	349	242	1	4	34	20	23	37	0	12	22	3
WSC2	117	203	135	0	0	36	9	21	26	2	3	18	1
ADE2	116	833	548	5	0	46	18	36	60	3	15	24	4
AGA1	116	54	47	0	0	21	5	10	11	1	6	6	1
AGE1	116	452	262	0	0	33	15	30	65	2	20	49	2
ARP4	116	260	169	2	1	27	9	30	14	0	5	19	0
COA3	116	556	339	1	3	35	12	16	32	3	11	16	1
DSE3	116	229	185	0	2	21	12	21	19	0	4	21	0
EAF3	116	404	267	1	0	30	18	21	19	1	6	19	2
HEM15	116	348	250	1	3	50	12	37	51	5	21	17	1
MNT2	116	173	140	3	0	35	17	24	14	0	3	22	0
MRPL6	116	417	241	5	1	42	12	22	31	0	12	15	1
PGM1	116	323	225	1	0	45	17	34	48	1	20	25	3
RSM18	116	562	310	0	2	31	14	21	55	3	16	20	2
SPT6	116	255	155	1	2	37	10	29	24	1	10	13	6
MRPL37	115	499	303	5	2	34	16	18	43	0	7	19	0
MRPS16	115	373	223	0	2	29	10	15	32	2	11	24	0
SDC1	115	278	196	0	0	20	6	27	18	1	8	19	0
ARO7	114	413	234	3	0	43	24	42	29	2	16	52	1
EDC3	114	288	204	0	0	20	17	22	18	0	6	17	2
GCR1	114	211	165	0	0	29	21	34	22	1	6	13	4
MAK11	114	277	202	4	0	33	10	30	31	1	6	40	1
MIC26	114	383	249	3	1	33	9	25	36	2	8	20	3
MRPL44	114	398	266	0	0	19	13	15	23	0	3	24	0
MSS116	114	318	230	2	0	44	7	34	40	2	4	19	3
NOP12	114	341	219	1	1	33	8	28	25	4	7	46	0
PLP2	114	402	227	1	1	28	11	21	26	0	6	23	0
ROX3	114	290	226	1	0	24	10	19	28	1	13	28	2
SPN1	114	366	268	3	1	41	10	22	33	1	10	22	3
TYR1	114	215	125	0	0	28	11	15	10	2	2	19	1
YCF1	114	160	113	4	1	45	18	39	18	0	5	17	6
EDC2	113	350	236	0	2	48	20	32	39	2	9	18	0
ERG12	113	245	183	2	2	28	15	28	11	2	11	25	2
GDS1	113	267	188	2	3	49	19	43	22	1	6	31	5
GFD1	113	356	249	0	0	13	12	25	19	0	12	21	0
GUP1	113	228	149	1	2	36	13	30	22	1	4	14	1
HUB1	113	442	238	1	0	37	24	40	37	1	7	22	0
NST1	113	161	126	0	0	12	11	17	26	1	3	20	2
OSM1	113	258	200	1	1	28	13	13	23	1	11	14	4
POP8	113	250	147	3	0	31	8	30	25	1	8	18	0
RPC34	113	219	157	1	1	28	11	20	8	0	0	21	0
SUA7	113	316	188	4	1	41	20	26	47	2	21	23	2
TSR4	113	245	184	4	0	43	10	22	28	2	10	32	2
BCH1	112	377	266	1	0	41	15	26	36	2	12	17	4
CYC8	112	195	134	0	1	23	10	23	42	3	11	17	10
GPI15	112	341	202	7	0	25	15	22	21	4	5	19	0
NTS2-1	112	91	62	1	4	30	7	32	30	0	17	53	12
PXR1	112	194	141	2	1	32	14	27	22	2	16	57	0
QNS1	112	330	221	4	0	46	13	42	34	3	7	15	1
RME1	112	257	219	1	2	37	11	20	41	2	7	19	1
RRP42	112	316	188	0	0	26	6	19	26	1	11	48	0
SKI6	112	302	207	0	1	23	17	26	16	1	7	28	3
SNF6	112	273	184	4	0	18	10	15	21	2	5	19	1
SNR191	112	251	170	201	20	36	12	24	40	8	33	84	64
TPS3	112	343	223	0	2	25	9	26	50	1	5	9	1
YOR302W	112	194	155	0	1	15	14	20	5	0	5	21	0
YPS1	112	225	140	1	4	53	23	59	39	1	12	6	3
BER1	111	253	169	1	0	18	11	13	7	2	4	11	2
CDC1	111	269	194	2	0	41	10	25	47	3	9	17	0
CTR1	111	162	140	0	2	14	18	26	13	1	6	25	1
HLJ1	111	324	245	0	0	29	13	25	21	3	9	21	0
LHS1	111	246	167	0	1	35	12	26	21	1	6	15	1
NPL6	111	278	241	2	1	28	12	19	23	1	5	19	0
NUP49	111	321	226	3	1	35	12	39	17	2	7	31	1
PHO85	111	250	189	1	1	30	16	18	15	0	4	15	1
SRG1	111	417	273	1	1	18	12	13	17	1	4	19	0
TMA17	111	764	550	0	2	30	12	25	64	4	33	1	1
UGA1	111	406	261	0	3	33	18	20	56	1	16	10	0
YAP1	111	270	206	2	0	41	25	32	20	1	4	19	3
ADE4	110	543	348	6	3	39	10	29	42	0	9	48	6
ENT1	110	287	242	0	1	17	10	22	33	1	24	23	0
GAL80	110	248	165	1	0	23	6	18	33	0	6	22	2
GIC2	110	229	156	0	1	17	6	15	32	3	15	26	0
IGD1	110	223	142	0	0	20	10	15	25	0	10	4	1
MED11	110	252	184	0	0	27	10	17	10	1	3	9	0
NSG2	110	449	252	0	0	36	16	32	75	1	31	32	1
PCS60	110	304	193	0	2	22	14	16	35	2	11	19	1
RSC9	110	175	130	4	0	17	13	23	22	2	5	12	0
TRP1	110	385	207	3	0	33	15	19	23	1	5	22	0
UTP4	110	203	126	0	1	33	10	32	22	0	14	57	2
VMA22	110	350	214	1	2	26	12	15	38	4	9	20	1
VPS60	110	392	272	0	0	26	9	29	26	2	12	20	0
ATP11	109	351	240	2	1	21	11	22	32	3	2	13	2
CKA1	109	329	187	1	1	41	12	57	38	3	14	35	2
COA1	109	355	236	1	0	31	14	15	29	1	8	16	0
ERC1	109	114	87	3	0	24	11	26	17	0	4	19	1
FAU1	109	226	153	3	1	22	6	20	22	1	6	39	1
GSH1	109	249	177	1	0	33	16	37	35	1	17	8	4
KAE1	109	210	152	0	0	32	11	14	24	0	6	19	1
MIC19	109	414	262	0	0	32	12	28	78	2	28	35	1
MIM1	109	441	286	1	1	28	15	19	24	2	11	24	0
MRP7	109	340	231	1	0	33	7	26	36	0	6	11	1
NCE101	109	250	155	0	0	19	14	16	28	2	5	15	0
NVJ2	109	311	207	1	1	28	7	22	31	0	9	19	6
PTC2	109	295	221	0	1	40	12	18	23	0	9	21	4
RFC1	109	189	133	2	1	32	10	30	34	1	8	23	2
RSC8	109	282	220	2	1	26	12	26	52	1	15	37	1
SHO1	109	186	166	0	2	49	19	26	15	0	5	24	0
SOL2	109	284	151	0	0	23	9	14	20	2	11	10	1
SUB1	109	420	269	0	1	24	12	18	28	2	14	19	0
SUN4	109	370	230	3	4	65	16	30	84	4	38	52	9
SUR1	109	283	192	0	2	35	17	23	34	1	10	13	1
TMA46	109	228	149	0	0	19	7	21	7	0	4	20	0
URA8	109	287	216	1	0	29	11	16	45	1	13	13	3
VAN1	109	240	167	2	1	49	16	44	82	2	20	55	2
YGK1	109	400	258	8	1	34	13	24	18	3	14	26	0
YGL242C	109	337	208	1	1	20	13	21	36	2	13	18	1
YKR018C	109	317	230	0	0	51	13	41	30	1	5	17	8
YML108W	109	197	143	0	3	28	15	20	16	0	9	31	0
YPI1	109	464	290	0	0	27	13	21	40	0	13	5	0
BET5	108	253	157	0	0	23	13	21	41	1	11	26	0
CLN2	108	237	169	0	1	32	12	24	17	0	5	20	2
CSR1	108	214	153	1	0	22	8	18	39	2	6	13	3
CYT1	108	668	420	0	2	26	6	22	70	2	32	14	0
DCP1	108	308	200	0	0	23	7	0	22	1	25	23	3
DFM1	108	247	170	0	0	24	9	12	18	2	6	11	0
EFR3	108	251	200	3	1	28	13	29	27	0	7	22	1
HMG1	108	171	124	1	0	33	15	15	24	2	5	20	5
KTR7	108	261	187	2	1	35	11	29	29	1	9	25	2
LAP3	108	463	300	0	0	38	11	26	26	1	8	14	3
MAK21	108	264	154	6	1	29	10	32	23	0	7	49	12
NOP14	108	218	148	3	0	29	12	21	32	2	6	32	1
POL5	108	196	124	2	0	35	6	16	9	0	3	24	5
PRS4	108	273	178	2	1	34	6	21	15	2	4	30	1
PYC2	108	561	427	4	3	50	21	30	56	3	10	26	5
RRS1	108	292	243	0	1	32	9	24	34	0	14	75	1
RTC6	108	322	240	0	0	25	13	17	33	3	10	12	2
SEC31	108	153	109	0	1	21	7	18	30	1	9	26	5
SRD1	108	236	154	0	0	30	15	23	19	0	5	7	2
VPS4	108	331	199	0	0	36	10	36	44	0	11	17	0
YAH1	108	190	133	0	0	22	8	6	26	2	11	21	2
AST1	107	205	128	4	1	28	14	16	13	1	7	14	1
HRK1	107	212	208	0	0	36	15	33	43	1	16	12	4
IES6	107	258	226	5	0	23	9	13	22	2	17	29	0
IMG1	107	286	164	1	0	25	18	14	16	4	12	14	0
MHF2	107	270	177	1	0	30	10	13	15	1	2	18	0
NAB2	107	269	198	1	0	22	10	24	29	2	21	37	3
NDI1	107	291	199	0	1	24	7	14	38	5	10	9	1
QRI5	107	361	242	0	1	17	14	17	17	1	4	11	0
SNF11	107	287	194	0	1	13	21	16	24	0	10	4	0
SRB7	107	305	188	0	0	20	9	9	11	0	4	23	0
TMH18	107	594	388	1	1	26	9	16	44	3	12	16	1
YME1	107	299	181	0	0	36	13	24	17	2	9	11	6
ALG5	106	312	192	1	1	27	23	20	34	0	7	30	3
APL6	106	261	164	0	2	25	9	39	14	0	3	11	2
EBP2	106	428	299	3	0	22	13	28	42	2	10	57	4
ERP6	106	397	254	0	0	34	11	23	22	2	7	17	0
GAL83	106	269	205	2	0	23	6	23	19	0	5	12	1
GPI11	106	267	147	4	0	27	13	15	31	2	11	41	0
GTR1	106	234	158	2	1	18	5	19	19	0	8	21	0
MRPL20	106	382	255	2	0	33	10	17	34	2	4	15	4
MRPL22	106	338	225	2	0	19	9	26	25	1	12	11	1
REH1	106	239	168	5	1	29	13	21	20	1	8	21	0
RSC6	106	188	115	0	1	25	8	22	13	0	2	21	0
SAS10	106	254	169	4	0	30	15	18	33	1	20	39	4
SEY1	106	286	186	1	1	29	13	15	24	3	11	23	2
SIT4	106	232	154	0	0	27	10	27	23	2	10	23	0
SMD1	106	323	238	2	0	20	10	16	27	0	5	14	1
SYM1	106	243	154	2	0	20	8	16	24	1	6	4	0
TAN1	106	310	191	0	1	33	14	24	25	2	3	28	0
TGL4	106	267	179	0	1	25	10	23	15	2	5	11	2
YPC1	106	189	159	0	0	34	12	19	29	0	4	4	0
APL4	105	232	160	0	0	25	9	17	23	0	8	8	3
ATG5	105	165	80	2	0	17	12	23	4	1	3	10	4
BXI1	105	335	201	0	0	44	15	24	25	1	5	10	1
COX15	105	398	299	0	3	50	6	13	58	6	30	9	3
GCN1	105	209	153	1	2	62	18	40	38	2	7	29	33
GGC1	105	797	451	1	0	24	13	19	56	1	19	16	2
GTS1	105	245	158	0	0	30	9	20	24	0	10	7	2
MRPS9	105	397	278	0	1	26	15	36	33	3	15	22	3
PIM1	105	209	160	0	0	27	10	23	17	1	9	20	7
PMR1	105	222	168	2	1	53	22	36	47	1	12	12	11
RPA14	105	270	167	0	0	28	14	16	21	0	8	34	5
RPN4	105	213	149	0	0	15	8	19	18	3	7	19	1
SMX2	105	259	176	0	0	24	12	13	29	0	8	14	0
SSD1	105	250	187	1	1	18	17	23	28	1	13	7	11
TAF4	105	185	148	0	0	24	6	25	22	1	7	26	1
UBX2	105	229	160	0	0	40	11	20	9	1	5	27	1
UTP10	105	112	92	3	0	46	12	40	20	4	7	35	20
UTP8	105	204	158	0	0	35	14	21	14	1	7	28	2
DOG2	104	491	313	2	3	21	11	27	35	1	3	8	0
GCD2	104	217	152	2	0	30	16	17	18	0	3	29	4
GLC8	104	519	295	0	0	23	22	24	48	3	11	25	1
KTI12	104	244	159	0	1	41	16	17	17	1	4	21	0
OCA1	104	241	186	1	0	21	8	21	16	2	9	14	0
OPT1	104	346	226	5	0	30	9	18	54	6	19	25	2
PMT4	104	272	205	10	2	127	31	103	92	6	19	35	7
RFC5	104	231	134	4	2	25	11	28	16	0	7	16	0
RSM10	104	376	228	1	0	18	16	23	48	6	17	18	0
SDH8	104	362	263	0	0	16	11	14	24	1	13	13	1
SNC1	104	360	238	0	1	25	17	13	32	5	5	14	0
COT1	103	201	159	2	0	20	11	14	29	1	8	12	1
DNF2	103	145	123	1	0	40	20	38	14	0	8	7	5
DPH2	103	156	105	2	0	31	11	12	13	2	8	45	3
ERB1	103	161	109	0	0	37	13	29	12	0	2	35	2
ERJ5	103	303	182	2	0	32	9	20	31	0	8	20	1
EUG1	103	257	164	1	0	32	12	17	19	1	4	14	1
MRPL36	103	406	263	1	1	19	24	13	27	1	8	26	2
PTR2	103	301	223	2	1	48	13	28	68	4	36	6	10
SIT1	103	89	75	3	0	15	8	21	4	0	2	19	2
SST2	103	199	128	1	2	45	13	39	16	1	3	17	2
TFB5	103	286	160	2	1	21	13	23	38	1	10	18	2
TUP1	103	183	115	0	1	25	13	27	46	0	15	24	3
TVP38	103	348	268	1	0	44	23	26	27	1	7	13	1
YER152C	103	161	90	1	0	22	15	27	9	0	5	13	1
ZRT3	103	267	165	0	2	42	17	21	43	1	11	18	2
ADI1	102	292	161	0	1	26	8	14	16	1	3	10	1
BOS1	102	290	213	2	0	26	15	27	20	1	8	15	1
COX5A	102	735	447	2	2	41	18	35	107	14	67	40	0
CSC1	102	264	163	1	1	32	15	21	29	1	5	10	1
CYC1	102	430	306	1	0	24	18	25	42	1	17	28	10
DUF1	102	643	369	0	0	29	11	29	69	3	17	24	2
EAR1	102	246	183	1	0	21	12	21	19	2	9	21	0
EDE1	102	292	205	3	0	24	11	31	59	1	10	13	6
ERV1	102	288	191	3	1	23	10	15	18	0	6	12	1
FAT1	102	427	286	1	2	35	12	28	29	1	11	15	2
MEX67	102	212	150	0	1	20	10	27	32	0	7	33	2
MNN1	102	379	279	2	4	31	11	18	36	0	7	20	3
MRPL10	102	336	199	2	0	18	12	12	30	1	10	16	0
MXR2	102	328	210	0	2	16	8	10	29	0	6	12	1
RNH203	102	175	113	0	0	19	5	18	15	0	1	20	1
RTF1	102	303	224	0	1	32	9	24	34	3	13	28	2
SLY1	102	257	177	2	0	44	14	21	27	2	5	22	0
SSM4	102	136	99	1	2	52	15	28	26	2	9	17	6
YPP1	102	226	169	0	1	34	11	30	17	0	1	18	3
FAP7	101	296	211	1	1	35	22	15	24	1	5	33	1
FUS3	101	147	80	1	0	15	6	11	8	0	7	18	0
GAA1	101	201	146	4	1	30	8	31	20	1	8	15	2
GYP6	101	250	171	1	0	20	19	18	10	1	2	14	1
GYP7	101	232	167	0	0	37	10	25	15	2	5	4	0
MLC2	101	351	208	0	0	19	13	13	33	1	14	24	0
MRPL33	101	376	242	1	1	15	7	30	43	3	12	23	1
NHX1	101	258	145	0	1	25	12	27	34	2	11	10	1
PEP12	101	289	182	0	0	14	11	11	34	3	8	2	1
PUT2	101	265	194	1	3	29	7	14	31	1	9	9	3
RSM26	101	286	189	0	1	25	13	15	33	1	6	19	0
SAP30	101	240	138	4	1	18	15	21	15	2	5	22	1
SBE22	101	147	101	3	1	34	8	24	17	2	3	16	7
SPT4	101	497	354	2	0	37	12	23	58	4	9	28	2
TRE1	101	211	135	2	0	26	10	20	19	0	2	5	1
YPQ2	101	184	143	0	1	32	11	15	17	1	5	19	0
YPT32	101	199	133	0	1	17	14	17	19	1	2	14	1
AIM20	100	266	173	2	0	15	12	16	18	2	11	19	2
ALT1	100	403	266	0	1	23	15	14	48	1	11	21	4
CMP2	100	372	250	0	0	28	11	22	22	2	8	12	1
DAD3	100	222	176	1	0	29	11	15	16	2	7	15	1
ERV15	100	263	156	1	1	25	4	3	35	0	23	13	0
FDC1	100	203	142	1	1	35	7	13	30	1	3	11	1
HSE1	100	286	184	0	1	20	14	18	17	1	10	8	2
HSK3	100	266	164	3	0	12	14	25	27	2	15	15	1
HSP26	100	183	141	0	0	16	10	18	10	0	0	7	0
IES3	100	268	191	0	0	21	9	17	18	0	5	26	0
IMP3	100	178	111	1	1	17	13	10	13	1	8	37	0
IZH1	100	512	375	1	3	19	12	18	73	7	30	74	2
LSG1	100	187	127	1	1	31	11	34	16	1	11	53	4
MATALPHA2	100	217	160	5	0	20	16	8	12	2	5	9	0
MET14	100	835	511	0	2	30	10	22	94	6	33	14	0
NDC1	100	216	187	0	1	38	16	27	15	0	2	14	0
NOB1	100	173	123	6	0	31	14	28	19	1	8	33	3
NUS1	100	280	169	1	1	34	17	28	22	1	6	16	1
OST3	100	217	177	0	1	57	12	38	65	1	23	27	2
PRS2	100	300	217	1	0	26	11	22	29	3	6	22	0
RET1	100	159	141	5	0	47	14	30	27	0	3	21	6
RHO2	100	228	163	0	0	29	4	19	48	1	10	28	0
SEC14	100	425	281	2	2	82	28	42	75	4	39	50	1
SFA1	100	246	139	4	1	31	14	26	29	3	11	35	1
SMY2	100	184	130	4	2	22	6	19	22	0	8	25	5
TMA16	100	300	171	1	1	19	12	28	37	4	17	56	0
TML25	100	355	231	0	1	34	16	35	16	2	7	19	0
VPH2	100	251	180	0	1	40	15	22	23	1	6	17	0
YLR363W-A	100	330	208	0	1	25	5	10	25	1	7	42	0
YTA7	100	167	101	0	1	26	17	24	19	0	3	15	4
CDC73	99	180	132	2	0	18	11	22	19	1	5	15	0
CST6	99	248	200	1	0	17	12	18	25	0	5	11	4
DDP1	99	438	306	1	1	30	11	15	48	2	9	13	1
DIP5	99	474	359	0	0	36	6	16	58	4	24	15	1
DIS3	99	169	149	4	2	22	8	20	13	0	3	20	3
GPA2	99	225	158	0	0	34	10	23	16	3	11	8	1
MRPL27	99	391	249	1	0	23	9	11	26	2	11	21	1
MRPL8	99	302	208	1	0	19	17	18	19	1	5	15	0
NET1	99	163	118	0	0	34	11	26	28	0	9	19	6
NUP188	99	178	112	2	1	33	14	18	28	1	8	21	11
OCH1	99	366	238	0	0	21	15	32	29	1	6	13	3
ODC2	99	584	370	0	1	51	14	31	37	1	13	24	1
QCR10	99	535	409	3	0	36	15	26	71	7	28	23	0
RRP45	99	320	199	2	0	34	16	18	37	1	15	44	4
SHS1	99	261	185	0	2	27	12	30	62	9	21	25	2
SNA4	99	217	147	0	0	28	6	10	22	0	11	8	2
TSC10	99	264	177	0	0	24	5	26	29	1	3	27	0
TSR1	99	181	126	8	0	31	16	19	20	0	7	30	1
UBP10	99	158	98	1	1	16	7	15	16	2	12	39	7
VTI1	99	465	281	0	0	22	9	23	37	1	7	16	1
AAP1	98	211	161	4	0	42	16	37	7	0	3	32	8
ARO1	98	225	184	3	1	35	17	32	46	2	16	10	12
BNA3	98	427	310	0	0	22	7	12	37	4	9	10	0
CDC36	98	276	137	1	1	26	14	16	34	1	7	29	1
DIB1	98	290	166	1	0	26	17	16	32	2	8	19	0
ERG5	98	500	367	0	2	30	17	24	73	1	27	38	1
ERP4	98	239	165	0	1	40	11	20	25	2	8	32	3
IMD2	98	549	399	1	0	34	10	31	95	8	22	7	1
LSB5	98	284	205	2	1	22	6	20	11	1	6	12	1
LSC2	98	636	424	4	0	41	24	26	50	2	20	15	2
NOP53	98	289	219	3	1	22	8	23	12	0	9	36	0
RRP46	98	310	235	0	3	21	17	21	15	0	5	24	0
SAP155	98	167	132	0	2	30	15	25	16	1	12	21	5
SMX3	98	292	166	0	0	20	17	8	33	0	8	23	0
SPL2	98	1282	945	1	1	23	9	20	124	12	53	43	0
STE14	98	283	187	2	1	31	16	21	20	2	4	18	0
STP1	98	217	138	0	1	22	9	17	18	1	2	18	1
TPO5	98	140	92	1	0	27	11	21	17	2	10	19	1
TRM7	98	151	121	0	0	23	8	19	13	1	5	25	0
YJR096W	98	443	284	0	1	31	14	20	39	0	7	7	0
ALG1	97	250	173	2	1	31	8	21	27	0	10	10	2
AUR1	97	211	140	3	1	77	21	38	42	1	20	44	5
CAR1	97	350	224	5	1	39	14	38	37	1	20	47	2
CPR8	97	328	205	0	1	31	14	23	16	0	9	15	0
EMI1	97	256	176	0	0	38	18	24	25	1	9	6	1
HBS1	97	230	131	0	0	38	10	21	19	1	4	15	0
MRP49	97	310	205	0	2	14	12	20	16	1	5	9	1
NAM7	97	267	192	8	0	49	17	28	19	2	3	17	3
PDE1	97	305	208	1	0	28	14	11	28	3	11	5	0
POM152	97	145	97	1	0	36	12	34	9	0	2	8	5
RBK1	97	353	220	0	0	30	14	21	22	0	12	16	1
RFC3	97	218	145	2	0	22	7	20	12	1	4	14	1
SAM3	97	163	129	4	0	54	19	33	29	4	5	17	0
SCP1	97	250	162	0	2	18	10	11	24	1	4	13	0
TAF6	97	175	144	0	2	35	8	18	20	0	7	26	2
TIM54	97	301	225	0	2	28	11	18	22	2	1	19	1
VPS29	97	308	203	2	0	33	22	23	20	1	9	27	2
YOR283W	97	441	238	0	0	27	11	31	64	2	22	60	0
ALK1	96	157	120	0	1	25	10	31	66	2	18	32	3
ATG8	96	321	219	0	2	22	9	9	26	1	4	5	0
BET3	96	302	192	1	0	52	22	31	49	5	24	24	0
BIM1	96	211	110	3	0	32	8	7	23	2	16	25	0
CAT5	96	287	168	0	1	22	5	15	31	1	10	9	1
CST26	96	270	165	2	1	35	13	22	35	1	10	18	1
DCS1	96	303	242	1	0	31	13	24	29	1	12	5	2
DLD2	96	260	175	1	0	30	14	19	30	0	11	20	0
DOA1	96	287	191	1	3	22	11	19	17	1	8	9	1
MAF1	96	350	193	2	1	24	5	13	32	1	11	10	2
MRP51	96	395	271	2	1	27	15	29	35	1	10	26	0
MRPL17	96	271	177	1	1	17	11	13	18	1	7	12	0
RRP15	96	308	205	3	0	19	10	14	28	0	8	48	1
RTT102	96	362	223	0	2	24	6	13	30	0	20	30	0
SLM4	96	268	168	4	0	19	17	23	17	0	6	10	4
SNF1	96	244	143	1	0	29	6	16	21	1	3	13	1
SOL4	96	251	142	0	0	24	14	12	25	1	10	3	0
STS1	96	243	161	2	0	45	8	22	13	1	1	17	3
SYG1	96	175	134	3	0	39	26	33	32	5	19	39	6
SYS1	96	328	195	0	1	31	15	21	22	4	5	17	0
TWF1	96	322	202	0	1	31	12	19	24	1	5	8	2
URA2	96	128	103	1	0	46	15	40	29	2	13	35	30
YEH2	96	201	125	1	3	33	8	31	21	0	6	21	2
APM3	95	265	173	1	1	27	14	32	17	0	2	16	1
APS2	95	361	245	0	1	18	15	13	53	0	15	22	0
CDC34	95	357	244	0	1	28	12	24	21	0	4	14	0
CHZ1	95	541	365	2	2	24	8	16	52	2	14	38	0
CMC2	95	302	223	2	0	21	19	14	11	0	6	8	1
DOT5	95	354	208	0	1	22	12	19	24	0	5	9	1
HNM1	95	361	249	4	2	55	18	34	45	1	18	39	2
HOL1	95	255	149	3	0	38	9	39	13	1	2	14	2
IMG2	95	229	149	0	1	16	13	14	18	1	7	12	1
NMA1	95	184	136	0	1	34	13	20	23	0	9	24	2
NUP85	95	157	118	0	0	26	12	13	26	3	6	11	2
POM34	95	182	110	0	1	19	10	26	14	0	6	16	0
PTK2	95	280	199	0	0	23	12	22	54	2	21	7	1
RPO21	95	122	79	1	3	24	11	21	49	1	20	20	42
SDS22	95	261	169	1	0	26	11	20	22	2	10	9	0
SPE2	95	196	122	0	0	21	9	15	9	0	2	22	1
TLG1	95	264	168	4	0	23	15	11	39	2	14	15	2
UTP23	95	197	158	2	0	30	8	19	13	1	5	58	1
YRA2	95	274	158	1	1	21	13	13	34	2	9	19	0
ALG12	94	218	146	0	2	22	7	20	31	1	13	11	0
APM1	94	229	151	2	0	18	12	14	28	0	8	13	2
APS3	94	220	138	0	0	29	10	23	20	2	4	14	0
CSL4	94	218	129	9	0	16	8	18	22	3	3	29	1
EFG1	94	279	165	6	1	24	8	9	27	1	10	37	0
ELP3	94	198	137	4	2	30	15	26	17	1	9	46	0
FRA1	94	251	164	0	1	43	11	22	44	2	9	28	1
FTH1	94	194	107	2	0	34	11	33	24	3	7	13	2
GOS1	94	227	142	0	2	19	5	10	11	1	1	12	1
GRE2	94	149	76	0	0	24	5	38	23	2	6	24	0
IES5	94	309	209	2	1	21	9	23	23	0	8	19	0
IMP1	94	284	203	1	1	24	10	7	19	1	11	18	1
IMP4	94	226	162	4	1	31	10	24	23	1	5	52	0
INP53	94	197	129	2	0	21	13	20	22	2	4	12	2
MET12	94	224	147	0	2	33	13	18	20	1	5	15	4
NOP4	94	264	173	0	0	24	10	20	25	2	5	55	2
OSH3	94	204	159	0	0	16	12	27	21	0	8	11	3
RIM11	94	210	170	1	0	32	10	20	25	2	13	13	0
RPD3	94	251	167	0	1	24	7	25	31	1	11	27	1
RPL15B	94	363	242	0	2	23	8	19	23	1	1	8	0
RSM7	94	279	174	5	1	29	14	16	18	0	6	10	2
TAF12	94	224	168	0	0	31	8	28	22	3	8	16	0
TAT2	94	180	111	1	0	32	13	27	46	1	23	38	6
TPN1	94	284	204	2	1	30	12	30	38	2	8	27	1
YNL122C	94	299	243	0	0	29	10	14	28	1	9	7	0
AIM2	93	342	217	0	0	34	8	23	28	0	6	14	1
BNA5	93	129	75	0	0	26	9	22	9	1	6	9	1
CBP6	93	249	159	0	0	10	12	3	18	1	5	6	0
DED1	93	192	120	13	3	51	6	20	70	8	39	15	5
DIP2	93	193	150	3	1	34	14	54	30	2	9	38	9
EPS1	93	233	162	0	3	25	14	19	17	1	9	18	0
FIS1	93	444	310	2	0	27	8	24	54	1	16	19	1
GCD10	93	153	100	7	1	23	12	26	9	0	5	34	0
HSP12	93	704	425	1	0	8	5	11	44	1	11	27	0
IKI3	93	200	178	7	0	26	12	31	31	0	6	40	3
MED2	93	210	128	0	0	21	12	20	22	1	9	19	2
MRPS8	93	305	186	0	2	20	8	9	23	1	7	16	1
MSB2	93	97	70	0	2	21	8	13	30	3	15	14	7
PHO90	93	133	103	2	1	49	4	22	14	0	3	20	2
RRP3	93	222	153	3	0	26	11	35	14	0	5	34	0
RRP4	93	140	97	2	0	25	10	29	12	1	10	47	0
SME1	93	317	230	2	1	20	14	17	41	1	9	25	1
SNR33	93	215	152	204	9	30	13	10	24	6	7	27	100
TAH1	93	240	148	2	1	26	12	23	23	2	9	27	0
YRF1-1	93	142	116	0	0	28	11	18	16	0	5	9	5
MMR1	92	201	140	1	0	16	11	29	26	1	7	10	3
MUD1	92	235	176	2	0	23	14	14	40	2	22	16	0
OSH7	92	227	149	2	0	23	8	18	10	1	4	13	3
SED4	92	123	89	1	1	24	7	15	22	0	5	6	3
SPT16	92	257	162	5	1	23	15	35	25	1	13	20	5
YGL039W	92	314	197	1	1	22	12	24	22	1	9	14	0
YOR1	92	202	127	3	5	34	21	30	29	0	13	23	8
YPS3	92	202	117	0	0	26	8	11	11	0	10	8	4
BBC1	91	159	135	1	0	25	3	18	27	0	7	4	4
CLB1	91	289	212	2	0	22	14	17	32	2	11	21	4
DLD1	91	343	251	2	0	31	14	20	17	0	4	7	0
FET4	91	532	336	1	2	28	16	24	26	2	11	16	3
FMN1	91	274	160	0	1	20	9	16	34	3	9	13	1
HUA1	91	229	131	0	0	16	3	7	12	0	11	8	1
MIC60	91	328	254	0	1	11	13	21	22	1	4	10	0
NHP10	91	288	179	1	0	20	5	18	28	1	8	13	0
NNR1	91	375	244	2	1	9	15	17	40	2	13	10	0
NUP159	91	126	73	2	1	22	7	25	11	0	8	19	8
PET123	91	287	200	1	1	25	13	15	22	0	7	14	0
POP2	91	237	144	2	0	20	11	12	53	2	14	21	0
RAI1	91	202	133	3	1	21	6	14	22	0	10	39	1
REX2	91	296	215	0	0	30	7	23	25	0	7	14	0
RPF1	91	229	166	3	0	19	14	28	20	1	5	49	4
RQC2	91	177	105	1	1	25	6	34	21	1	10	17	5
SFG1	91	154	99	0	2	24	7	21	28	1	5	25	1
SNF7	91	434	253	0	1	32	16	27	54	1	41	26	3
TOA1	91	324	202	1	0	22	11	11	27	1	11	24	0
VHR2	91	288	214	0	0	15	9	17	32	0	8	29	2
YVH1	91	191	117	1	0	18	14	19	10	1	4	42	1
AFG1	90	283	173	2	1	21	14	15	23	0	10	26	3
ALG7	90	190	148	1	0	38	12	21	20	0	4	20	1
APL2	90	201	144	0	0	23	6	17	17	1	8	8	1
APM4	90	306	194	0	1	36	7	19	38	2	10	15	3
ARG4	90	609	430	2	4	28	8	24	80	5	25	13	4
CDC53	90	246	185	0	0	15	5	13	23	0	13	14	2
DJP1	90	265	151	1	0	24	13	12	23	0	7	8	2
HEL2	90	199	148	0	0	29	10	22	21	0	7	14	0
HMG2	90	232	170	3	4	32	7	19	23	0	5	13	1
HUT1	90	187	122	1	0	30	16	44	48	3	7	30	0
IES4	90	310	184	1	0	19	13	10	18	3	8	17	0
KEX2	90	205	116	0	2	28	9	19	26	1	6	20	6
MAK3	90	262	135	1	1	19	6	15	37	0	10	30	0
MET22	90	507	306	1	1	28	21	25	48	4	16	24	3
NUP82	90	200	130	3	0	25	7	19	15	1	5	21	3
POB3	90	376	240	6	1	36	13	49	99	1	27	35	1
PPS1	90	200	113	3	3	31	10	31	22	0	6	15	5
REA1	90	86	71	2	0	24	7	23	22	3	9	28	74
RTG2	90	293	185	0	0	26	10	33	32	1	7	29	0
SEG1	90	129	81	0	1	12	7	16	15	1	9	10	2
TGL1	90	294	212	1	0	27	9	24	35	1	9	11	0
XPT1	90	227	180	1	0	25	6	28	12	0	1	10	2
BUD21	89	287	172	1	0	12	12	17	25	2	8	42	3
CAN1	89	199	134	0	1	31	5	15	35	1	7	32	2
CDS1	89	284	189	0	0	30	20	23	29	0	12	27	3
CMK1	89	284	171	1	0	21	10	19	22	0	4	9	0
ECL1	89	253	150	0	0	19	7	12	27	1	6	9	2
GMH1	89	181	126	0	1	26	6	19	18	0	10	20	1
GRX6	89	248	170	0	0	15	6	19	32	0	5	13	1
IDP1	89	401	234	7	5	60	33	44	43	1	15	9	7
LCB3	89	162	108	5	2	23	11	31	19	0	13	20	0
NFS1	89	180	145	3	0	30	9	24	32	0	15	11	3
PAL1	89	231	168	0	3	18	10	25	20	1	11	21	3
PBN1	89	277	193	0	0	24	12	17	32	1	14	20	0
PDE2	89	265	180	5	2	21	9	18	26	3	12	25	2
RQC1	89	166	112	1	2	21	9	19	12	1	2	15	3
RRG7	89	191	127	0	0	13	6	10	13	0	9	9	2
UTP22	89	140	106	1	1	22	10	17	19	2	11	24	7
YOL057W	89	253	189	4	1	42	16	21	39	1	7	14	2
BRE5	88	232	168	1	2	34	10	27	78	4	40	34	3
CDC28	88	263	182	3	0	17	7	13	15	0	5	21	2
CYR1	88	204	135	0	0	18	2	23	25	1	3	5	4
DDI1	88	191	131	1	2	24	7	8	18	0	7	9	1
[truncated: 3,506 more rows]

## Sheet: RPMs-no_rRNA
Gene name	RPM-NOrRNA_polyA_control_10_05_18	RPM-NOrRNA_polyA_control_09_02_19_1	RPM-NOrRNA_polyA_control_09_02_19_2	RPM-NOrRNA_total_ribominus_polyI_09_11_19	RPM-NOrRNA_total_polyI_03_03_19	RPM-NOrRNA_polyA_polyI_10_07_18	RPM-NOrRNA_polyA_polyI_12_14_18	RPM-NOrRNA_polyA_polyI_06_19_19	RPM-NOrRNA_polyA_polyI_09_02_19	RPM-NOrRNA_polyA_polyI_09_25_19_1	RPM-NOrRNA_polyA_polyI_09_25_19_2	RPM-NOrRNA_polyA_polyI_10_01_19	RPM-NOrRNA_ChrA_polyI_09_11_19
SUM reads	1e+06	1e+06	1e+06	1e+06	1e+06	1e+06	1e+06	1e+06	1e+06	1e+06	1e+06	1e+06	1e+06
TDH3	19821	18529.8	18683.5	1263.51	9455.37	19873	12379	7647.98	19182.3	16135.6	17764.5	10484.1	4820.96
ENO2	10928.8	11180	11518.5	3524.52	9171.71	10991.5	11041.6	13034.3	14738.4	11955.6	16038.3	8220.34	2856.86
RPS31	10593.9	11623.9	11592.3	20515.4	7847.96	11126.8	11029.1	10372.4	9071.42	6427.26	7331.4	10983.5	876.538
FBA1	10535.2	14645.9	15277.1	2693.27	11819.2	11050.2	10780.3	13406.6	17522	14292.8	16822.3	9314.41	1769.31
ADH1	10260.5	10655.8	10503.1	4655.03	9739.03	10508.7	10693.2	11106.6	13950.1	11191.5	12867.8	7517.24	1331.04
GPM1	10184.1	11510.1	11140.1	1263.51	7753.4	8401.32	10096	9391.22	7280.85	5303.61	5921.51	5779.21	1152.49
CCW12	9871.2	7543.44	8397.33	731.505	16736	14020.9	15489.3	9680.02	8327.29	13169.1	6485.47	10158.8	1704.38
PDC1	8862.05	7084.92	7655.89	964.256	9266.26	8360.45	8111.67	10828.3	10945.7	7865.52	12015	9156.71	2710.77
TEF2	7851.43	7625.42	7924.66	5054.03	6335.1	6766.53	6450.77	8570.06	11764.2	14247.8	16822.3	8792.02	1801.77
TEF1	6955.38	6235.29	6307.22	4655.03	6996.97	7706.53	6649.83	7487.93	7838.95	4629.42	7523.97	9406.41	1931.63
RPS12	6883.4	7273.56	7092.27	14763.1	3971.26	6809.95	6195.73	6214.42	9969.03	10607.2	8899.46	10602.3	892.77
gag-pol_20fusion_20protein	6418.49	2792.59	3054.83	2094.76	5578.67	6526.41	5648.31	7487.93	4381.07	2966.43	4614.79	2280.14	77638.5
CDC19	6172.44	6925.91	6980.81	3358.27	7091.53	7481.75	6089.97	6774.62	8227.29	4584.48	7517.09	5460.51	1753.08
PGK1	5717.81	5731.35	5578.09	1529.51	4160.36	6666.91	3999.85	4704.31	9043.51	5393.5	7634.01	3364.36	1542.06
RPL39	5696.51	2973.33	3517.43	1662.51	2647.5	3558.24	5480.36	2550.49	1144.1	1573.1	859.686	2056.73	64.9287
TPI1	5554.02	7226.9	7116.5	1097.26	6429.65	5627.28	5598.55	5546.35	7250.62	5033.93	6313.53	4974.26	616.823
RPL28	5073.68	5698.75	5739.5	9409.81	4254.92	5668.15	5803.83	5052.26	5304.26	4854.15	5268.15	7385.82	762.913
RPS20	4887.86	4909.87	4844.48	3956.77	3025.72	4835.42	5038.69	5062.7	3039.31	2876.53	2585.93	5749.64	470.733
RPL41A	4660.18	3151.84	3240.46	10407.3	3593.04	5806.08	5623.43	2418.27	3227.67	3865.34	2929.81	3495.78	324.644
RPL41B	4441.31	3966.9	4045.64	8678.3	1229.2	3798.35	3116.52	1489.23	1585.93	1033.75	1024.75	2188.15	32.4644
RPS2	4408.99	4012.83	3847.33	4256.03	3687.59	4153.41	4509.94	4561.65	3939.24	4000.18	3817	5572.22	665.52
RPS3	4381.08	4511.84	4468.36	1928.51	4444.02	4288.79	4541.04	4725.19	3371.84	2202.35	2867.91	5207.53	616.823
TDH2	4346.56	6047.39	5892.33	565.254	4254.92	5124.07	4292.22	4478.14	8118	6157.58	6361.67	2165.15	665.52
RPL25	4288.54	5011.35	5264.59	166.251	4160.36	3708.94	3595.51	3855.31	6701.83	8539.71	8136.06	5624.79	909.002
RPL30	4236.39	4556.29	4584.29	1197.01	4065.81	4906.94	5436.81	4161.51	1930.09	1887.73	1932.57	4606.28	275.947
RPP2B	4218.76	4446.66	4388.96	565.254	2269.29	4350.09	4223.79	3851.83	2492.84	2157.4	2654.71	5105.68	227.251
RPL38	4136.5	4864.43	4661.08	3657.52	2836.61	4293.9	4273.56	3771.8	2855.6	3236.1	2372.73	5499.94	162.322
RPS5	4112.27	4304.43	4021.04	764.755	3971.26	4122.75	3962.53	4599.92	5806.54	5842.96	6251.63	5631.36	503.198
RPS23B	3877.24	4382.21	4266.32	5453.03	2458.4	3836.66	3701.26	3778.76	4443.86	4224.91	4257.16	4747.56	486.966
RPL32	3830.23	3797.28	3950.96	199.501	3876.7	3890.31	3234.72	3152.44	3297.43	3685.56	3211.79	5171.39	470.733
RPL3	3800.85	3633.33	3510.35	7248.55	2552.95	5193.03	3359.13	2773.18	2437.03	2202.35	2640.95	3834.19	811.609
RPL23B	3796.45	4028.88	3709.03	6284.29	3403.93	2952.85	3191.17	3670.89	4890.33	6696.93	6010.92	3883.47	259.715
RPL40A	3754.58	4136.29	4104.17	1596.01	3876.7	3647.64	3794.57	3166.36	3241.62	4494.58	3404.35	4724.56	454.501
RPS10A	3717.86	3279.01	3300.11	964.256	3025.72	3284.92	3918.98	3462.12	3846.23	4045.13	3087.99	3101.52	275.947
RPS25A	3654.7	4551.59	4592.49	3591.02	2552.95	3913.29	4541.04	4189.34	5904.21	11461.2	7152.58	5706.93	211.018
RPL29	3617.24	2774.31	3025.38	5685.79	1323.75	3180.19	3477.32	1635.37	1853.35	1707.94	949.093	2749.97	64.9287
RPS8A	3589.33	3851.35	3828.69	1961.76	3309.38	3609.32	3502.2	3695.25	3639.26	3101.26	4491	4619.42	584.359
RPS30A	3587.13	3966.41	4044.52	1230.26	3214.83	3785.58	3925.2	3716.13	3888.08	3910.29	3583.17	4123.31	178.554
RPP0	3542.32	2792.09	2783.45	1496.26	3498.49	3910.74	3807.01	3949.25	3053.26	3056.32	2833.52	4182.45	779.145
RPL2B	3527.63	3461.47	3368.32	3524.52	2458.4	2973.29	3359.13	3364.7	4285.73	7371.12	6595.51	4267.87	649.287
RPL27A	3497.52	3655.05	3589.75	8079.8	3876.7	2952.85	3695.04	3695.25	3041.63	2966.43	2799.14	3370.93	194.786
RPL18A	3482.1	3283.7	3288.55	1197.01	2931.16	3404.97	3328.03	3333.38	3897.38	3146.21	4559.77	4911.83	584.359
RPL26B	3475.49	3602.95	3511.47	964.256	3025.72	3652.75	3856.78	3820.51	4399.67	4494.58	4491	4576.71	259.715
RPS27B	3451.98	2369.87	2636.21	665.004	2552.95	3767.7	3315.58	2195.58	2462.61	2067.51	1341.11	2960.24	211.018
RPS9B	3421.14	3498.02	3528.61	631.754	3025.72	3757.48	4018.51	3517.79	2395.17	1393.32	2579.06	5329.09	389.572
RPL36B	3406.45	3818.51	3900.64	199.501	2363.84	2814.92	3259.6	3235.95	4248.52	3865.34	4154	4389.44	405.805
RPS28A	3382.21	3511.6	3449.59	1230.26	1229.2	3060.13	3477.32	2762.74	3609.03	4449.64	3156.77	3288.79	194.786
RPL42B	3366.05	3600.49	3627.02	5353.28	3593.04	3083.12	3483.54	2992.39	2869.55	2741.7	2276.45	3959.04	227.251
RPL9A	3357.97	3664.93	3576.7	6982.54	2269.29	3090.79	3197.39	2968.03	1513.84	1438.27	1389.25	3449.78	292.179
RPL43A	3339.61	3596.04	3630.38	565.254	3214.83	2934.97	3415.11	2400.87	1948.69	2337.18	1636.84	3867.04	308.412
RPL10	3316.11	3275.3	3223.32	12136.3	2931.16	5359.07	4876.96	4478.14	4111.32	2651.8	5116.85	5246.96	746.681
RPS26A	3309.5	4256.29	4423.25	33.2502	3120.27	3249.16	3128.97	3002.83	2834.67	2651.8	2950.44	4721.27	730.448
RPL14A	3284.53	3743.45	3800.36	1662.51	2269.29	3221.06	3421.33	3173.32	2960.24	2516.97	2716.61	3926.18	551.894
RPP1A	3249.27	3456.54	3317.63	764.755	1796.52	2687.2	3620.39	2814.93	1148.75	1797.83	1169.17	3052.24	211.018
RPL5	3244.13	2619.5	2765.93	365.752	3876.7	3200.63	3228.5	3563.03	2264.95	3281.05	2324.59	3377.5	665.52
TMA19	3240.46	4240.48	4016.94	8079.8	3025.72	3203.18	3464.88	3239.43	4129.93	4809.2	4119.61	4425.58	454.501
CWP2	3221.36	3179.75	3506.25	365.752	3687.59	4107.43	3384.01	2487.86	5834.45	11955.6	7063.18	3564.78	340.876
RPS22A	3219.89	3252.59	3322.1	698.254	3025.72	3887.75	3651.5	3441.24	2606.78	3011.37	2214.55	3597.63	357.108
RPS13	3186.84	3515.55	3398.52	532.003	3971.26	3353.89	2593.99	2738.38	3241.62	4135.02	3225.54	4504.43	503.198
RPL7A	3166.28	2600.98	2649.26	698.254	2647.5	3126.55	3247.16	2943.67	2518.42	2247.29	2778.5	3683.05	551.894
RPS30B	3156.73	2524.93	2747.29	232.751	1701.97	2766.38	2743.29	2251.25	3269.52	4629.42	2558.42	2937.24	97.3931
RPS21A	3106.05	3242.22	3293.02	2360.76	2174.74	2636.11	3116.52	2881.04	3202.09	4494.58	3583.17	3301.93	211.018
RPL31A	3086.22	3829.37	3857.02	166.251	2458.4	2426.65	2743.29	2463.5	3213.71	3775.45	3356.21	3177.09	162.322
RPS15	3077.41	3242.46	3203.19	199.501	2269.29	3131.66	3290.7	2981.95	3229.99	5753.07	4209.02	3755.33	519.43
RPS7A	3051.7	3450.36	3226.3	4655.03	2552.95	2653.99	2923.69	3089.81	1764.98	1842.78	1740	2976.67	389.572
RPS1B	3019.38	3238.76	3179.33	3291.77	2742.06	2843.01	2556.67	3295.11	4055.51	3820.4	4497.87	3699.48	681.752
RPL13B	3016.45	3131.35	3204.31	1097.26	2742.06	2263.17	2550.45	2282.56	1381.29	1213.54	1416.76	2832.11	324.644
RPL33A	3012.04	3046.17	3023.51	598.504	2269.29	2699.97	2606.43	2818.41	3590.43	4854.15	4133.37	3982.03	308.412
RPS14A	3005.43	3726.41	3659.08	199.501	3498.49	3078.02	3408.89	2665.31	1583.6	1932.67	1705.62	3584.49	373.34
RPS24A	3005.43	3534.81	3619.2	1197.01	2363.84	2715.3	3166.29	3350.78	4050.86	6651.98	5343.81	3978.75	162.322
RPL22A	2985.6	3046.17	3022.77	2527.02	1985.63	2791.93	3240.94	2439.14	1534.77	1303.43	1134.78	3150.8	81.1609
ASC1	2948.14	2856.29	2985.12	7780.55	3025.72	4112.54	2755.73	3510.84	3104.42	2247.29	2592.81	4103.6	714.216
CPR1	2923.17	2751.35	2609.37	665.004	3025.72	2562.03	2861.48	2540.05	1820.79	1797.83	1671.23	1678.89	292.179
RPS21B	2918.03	2581.23	2609.37	299.252	2080.18	2569.7	2929.91	2449.58	2355.64	1663	1437.39	4179.17	129.857
EFB1	2914.36	2414.32	2432.68	631.754	1134.64	2631	2363.83	2247.77	1792.89	1033.75	1506.17	3236.22	827.841
RPP1B	2886.45	2850.61	2862.85	133.001	2269.29	2564.59	2967.23	2567.89	2983.5	2741.7	2826.65	3702.77	308.412
RPL20B	2878.37	2924.44	2839.74	299.252	1607.41	2413.88	2737.07	2602.68	2897.46	2921.48	2544.67	3032.52	324.644
RPS18A	2854.86	2896.78	2866.21	1463.01	2552.95	2917.09	2774.39	2498.3	2562.6	2067.51	2358.98	3788.19	486.966
SNR39	2841.64	2448.64	2471.45	299.252	1796.52	2485.4	2575.33	2460.02	1978.92	2067.51	2441.51	2940.53	324.644
RPL35A	2808.59	3312.83	3157.34	997.506	1512.86	2043.5	2482.02	2167.74	2448.65	2516.97	2627.2	3160.66	113.625
RPL19B	2799.78	2847.89	3062.28	498.753	1985.63	2602.9	2519.35	2613.12	1825.45	1078.7	1712.49	3324.93	405.805
AHP1	2791.7	1506.66	1436.64	33.2502	2174.74	2556.92	2538.01	2748.82	1539.42	1663	1396.13	1429.2	227.251
RPL12B	2791.7	2929.62	3027.61	166.251	1985.63	2595.24	2226.98	2359.11	2848.63	2696.75	4387.84	2976.67	259.715
gag_20protein	2765.99	1441.97	1410.18	299.252	1985.63	1463.65	1300.11	2352.16	1255.72	1078.7	1843.17	624.246	16702.9
RPL1B	2741.02	2730.12	2626.52	5552.78	1796.52	3795.79	3240.94	2947.15	1699.87	1618.05	1423.64	3545.06	714.216
RPL4A	2735.15	2288.64	2323.08	365.752	1891.07	2832.8	3290.7	2961.07	883.655	674.188	804.666	1445.62	422.037
RPL42A	2729.27	2762.46	2784.2	2028.26	2269.29	2010.29	2202.1	2112.07	2562.6	2876.53	1911.94	2766.4	275.947
SNR24	2728.54	2745.18	2849.8	5419.78	2836.61	3673.18	2394.93	3142.01	2513.77	2022.56	2255.81	3456.35	405.805
RPS23A	2727.07	3023.45	2739.47	4688.28	2269.29	2569.7	2457.14	3044.58	3716	4224.91	4236.53	3525.35	243.483
RPL34B	2723.39	3120.98	3250.16	199.501	2458.4	2786.82	2942.35	2734.9	2157.98	2157.4	2063.25	3272.37	243.483
RPL8B	2709.44	2747.65	2756.99	166.251	2458.4	2702.52	2873.92	2595.72	1890.56	1168.59	1444.27	2868.25	551.894
RPS18B	2706.5	2883.94	2702.19	3790.52	1796.52	2498.17	2282.96	2630.52	3097.44	4090.07	3314.95	3108.09	162.322
RPL40B	2678.59	2892.09	3055.94	631.754	3214.83	2579.91	2457.14	2522.65	3009.08	2921.48	2991.71	3814.47	243.483
ZEO1	2676.39	1777.03	1751.63	1928.51	1229.2	1913.22	2295.4	2390.43	2278.9	4269.85	2998.58	1915.45	97.3931
RPS4A	2642.6	2544.93	2607.51	2560.27	3309.38	2733.18	2923.69	2734.9	2560.27	2157.4	2434.63	3078.52	665.52
RPL11A	2630.12	2687.4	2717.1	1795.51	1891.07	2671.87	2314.07	2432.18	2306.81	809.025	1994.47	3190.23	259.715
SNR18	2610.29	2261.23	2267.17	332.502	378.215	2069.04	1387.2	1169.12	1276.65	898.917	1155.42	1534.33	616.823
RPL21A	2591.93	2774.56	2779.72	1463.01	1985.63	2365.35	2482.02	2540.05	3036.98	4314.8	3507.52	3364.36	405.805
RPL43B	2583.85	2126.17	2142.29	4189.53	3214.83	2403.66	2183.43	2066.83	2053.34	2472.02	1753.76	2372.14	48.6966
RPS8B	2559.61	2635.3	2577.68	432.253	1607.41	2186.54	2475.8	2473.94	2876.53	3460.83	3493.76	3002.95	454.501
RPL37B	2543.45	2456.78	2451.32	365.752	1607.41	2457.3	2146.11	1927.65	2690.5	2786.64	1870.68	3492.49	178.554
RPS1A	2531.7	2785.43	2651.49	2227.76	2269.29	2102.25	2314.07	2609.64	3036.98	3910.29	4002.7	2667.83	405.805
RPS17B	2524.35	2397.77	2342.1	3990.02	2458.4	2196.76	2214.54	2710.55	3269.52	3236.1	2599.69	3531.92	146.09
RPS10B	2490.57	2133.33	2367.44	997.506	1891.07	2388.34	2954.79	2188.62	1671.97	2427.08	1409.88	2145.44	97.3931
RPS17A	2428.14	2604.44	2608.62	4222.78	3025.72	3019.27	3272.04	3055.02	3271.85	2786.64	3039.85	3922.9	438.269
RPS16A	2403.17	2869.62	2751.77	2261.01	2363.84	1954.09	2183.43	2199.06	3034.66	5663.18	3761.98	3098.23	275.947
RPL37A	2378.2	2540.49	2612.72	66.5004	2647.5	1989.85	2444.7	1997.24	2613.76	2876.53	2221.43	2799.25	113.625
RPL24A	2377.46	2921.97	2929.2	166.251	2552.95	2608.01	3029.44	2536.57	2616.08	2741.7	2812.89	2966.81	243.483
RPL21B	2354.69	2488.39	2402.48	232.751	2647.5	2107.36	2444.7	2150.34	2974.2	2382.13	3122.38	3127.8	308.412
RPS6A	2318.7	2460.74	2418.89	2493.77	2174.74	2510.95	2264.3	2943.67	3297.43	3640.61	4676.69	3393.93	405.805
RPS19B	2313.56	2687.65	2725.67	1961.76	2363.84	2311.7	2593.99	2188.62	1944.04	1752.89	2269.57	2907.67	389.572
RPL6A	2300.34	2805.43	2715.98	166.251	2742.06	2350.02	2463.36	2230.37	1644.06	1393.32	1334.23	2519.98	227.251
HOR7	2279.78	3327.89	3241.21	199.501	2269.29	1650.12	2164.77	2480.9	4513.62	6022.74	5398.83	371.262	64.9287
RPS16B	2277.57	2400.98	2263.44	764.755	2647.5	2063.93	1996.82	2094.67	2339.36	2022.56	1994.47	2779.54	373.34
STM1	2276.84	2444.93	2291.4	1662.51	1229.2	1749.74	1816.42	2212.97	1920.79	1393.32	2077	2145.44	259.715
RPL15A	2249.67	2304.93	2242.57	5652.54	5105.9	4814.99	5312.4	4523.38	2890.48	3550.72	3411.23	3623.91	503.198
RPL16B	2204.13	2439.25	2405.84	798.005	3593.04	2590.13	2071.46	2327.8	1806.84	1887.73	1877.55	3334.79	422.037
RPS29A	2166.67	1775.55	1923.11	266.002	945.537	1657.79	1940.83	1196.95	1169.68	2516.97	1114.15	2050.16	129.857
TSA1	2163.73	2272.34	1924.6	199.501	2080.18	1703.76	1685.78	2073.79	2930.01	3820.4	3679.45	1810.31	259.715
RPS0A	2160.79	1967.16	1768.41	232.751	1512.86	1706.32	1586.25	2018.12	2223.09	3910.29	3046.73	2171.72	227.251
RPL17A	2156.39	2132.34	2226.17	166.251	2080.18	2270.83	2158.55	2164.26	1585.93	1303.43	1451.15	2487.13	194.786
RPP2A	2124.81	2398.02	2587.38	299.252	3876.7	3093.34	3402.67	3378.61	1795.22	853.971	1533.68	3660.06	438.269
RPL1A	2095.43	2325.67	2204.92	1529.51	2931.16	2043.5	1909.73	2157.3	2692.82	2022.56	2049.49	3035.81	405.805
RPL2A	2075.6	2012.84	1980.14	1496.26	1418.31	1788.06	2003.04	2212.97	1885.91	1797.83	2235.18	2401.71	405.805
RPS29B	2068.25	1749.87	1890.3	133.001	1229.2	1905.56	1716.89	1343.09	1664.99	1977.62	1176.05	2086.3	194.786
RPS4B	2035.94	1857.28	1852.28	2693.27	2742.06	2163.55	1978.15	2233.85	1730.1	1752.89	1519.92	2947.1	470.733
RPL19A	1977.18	2184.93	2200.82	299.252	1418.31	1836.59	2170.99	1955.49	890.631	943.863	962.848	1807.03	340.876
RPL20A	1918.42	2108.39	2056.18	199.501	1985.63	1668	1679.56	1558.82	1941.72	1618.05	1719.37	2404.99	275.947
RPS11B	1915.48	1695.06	1728.52	399.002	1891.07	1836.59	1891.06	1628.42	983.648	988.808	1004.11	1764.32	275.947
RPS11A	1908.87	1691.11	1678.57	133.001	1607.41	1639.91	1772.87	1482.28	1306.88	1258.48	1141.66	2027.16	292.179
SSB1	1833.22	1809.13	1834.76	1795.51	1323.75	1905.56	1754.21	2303.44	1671.97	1033.75	1368.62	2138.87	973.931
RPL24B	1822.94	2213.82	2210.51	1596.01	1229.2	1795.72	1940.83	1868.5	2220.76	1977.62	1966.96	2634.98	162.322
RPL12A	1806.05	2088.64	2004.37	731.505	945.537	1811.05	1667.12	1673.65	1895.21	1977.62	1863.8	2454.27	259.715
RPL23A	1787.69	2040.49	1914.9	3225.27	1323.75	1476.43	1766.65	1941.57	2106.82	3685.56	2895.42	2625.12	227.251
RPS19A	1772.26	2053.33	2055.44	598.504	850.983	1578.6	1542.71	1624.94	2367.27	2472.02	2379.61	2809.11	227.251
SOD1	1766.39	1503.7	1510.83	698.254	1040.09	1530.07	1586.25	1430.08	1420.82	1258.48	1279.21	1179.5	146.09
GPP1	1725.99	1759.5	1608.86	0	1985.63	1522.4	1449.4	1367.45	2013.8	2516.97	1850.04	1728.18	211.018
HHF2	1674.58	1344.94	1435.15	332.502	1040.09	1680.78	2202.1	1819.79	1241.77	1033.75	955.97	2083.01	81.1609
RPL11B	1671.64	1389.87	1404.96	365.752	1796.52	1499.42	1604.92	1524.03	1344.09	1168.59	1169.17	1987.73	146.09
ENO1	1670.17	4617.27	4615.23	133.001	2458.4	1877.46	1816.42	1729.32	4336.89	3011.37	3617.56	387.69	162.322
RPL26A	1666.5	1450.86	1489.2	266.002	1323.75	1187.78	1362.31	1179.56	974.346	943.863	983.48	1895.74	146.09
RPS28B	1664.3	1503.7	1436.64	1330.01	189.107	2283.61	1132.15	702.863	790.639	988.808	1533.68	1258.35	16.2322
RPS26B	1645.94	2242.96	2206.78	33.2502	1985.63	1570.94	1965.71	1798.91	1841.72	1663	1781.27	2076.44	194.786
HHT2	1637.12	1957.03	2002.5	1629.26	2080.18	1711.43	1841.3	1691.05	3192.79	1213.54	3253.05	3055.52	211.018
RPL34A	1624.64	1971.85	1946.22	166.251	1891.07	1402.35	1399.64	1346.57	1520.82	1663	1258.58	1839.88	227.251
RPL27B	1606.27	1490.12	1422.85	598.504	1040.09	1364.03	1337.43	1280.46	1223.16	1528.16	1210.44	1662.47	146.09
HTA1	1603.34	1578.02	1607.37	166.251	1229.2	1698.66	1853.74	1541.43	1653.37	1752.89	1740	3006.24	64.9287
HHF1	1598.93	1269.38	1189.13	365.752	661.876	1295.07	1530.27	1398.77	1551.05	1797.83	1774.39	2480.56	81.1609
HSC82	1594.52	901.973	939.746	864.505	1323.75	1757.41	1810.2	2125.99	948.767	1033.75	852.808	1090.79	308.412
RPS6B	1585.71	1756.54	1590.6	2194.51	756.43	1948.98	1828.86	2105.11	2616.08	3550.72	3349.33	2322.85	551.894
ACT1	1572.49	1768.39	1705.41	166.251	1985.63	1777.84	1312.55	1795.43	1978.92	1977.62	1341.11	1097.36	535.662
RPL33B	1560	1268.15	1184.65	2094.76	1040.09	1118.81	1138.37	1123.88	1448.73	2966.43	1733.13	1728.18	97.3931
HHT1	1553.39	1287.4	1270.39	2394.01	1040.09	1307.84	1486.73	1569.26	1609.18	1348.38	1581.82	2963.53	81.1609
RPL16A	1553.39	1654.81	1628.99	166.251	3214.83	1435.56	1461.84	1322.22	1625.46	1618.05	1416.76	1807.03	211.018
PSA1	1544.58	1459.01	1500.76	2227.76	1229.2	1448.33	1368.53	1889.38	1946.37	3146.21	2620.32	1977.88	324.644
PGI1	1535.77	1595.31	1595.07	1296.76	850.983	1417.68	1013.96	1499.67	1758.01	1393.32	1733.13	1011.94	405.805
RPS0B	1527.69	1436.79	1379.98	266.002	1418.31	1455.99	1138.37	1530.99	1541.75	1483.21	1911.94	2017.3	422.037
HTA2	1516.67	1725.92	1649.49	798.005	1323.75	1611.81	1461.84	1530.99	1923.11	1348.38	1918.82	2378.71	113.625
SED1	1490.96	1581.97	1498.15	0	1323.75	896.584	827.341	922.073	2283.55	3146.21	3039.85	436.972	162.322
HTB1	1470.4	1592.59	1557.42	33.2502	1040.09	1016.64	1312.55	1064.73	1374.32	1663	1478.66	1997.59	32.4644
RPL35B	1466.73	1809.87	1804.19	432.253	1134.64	1292.51	1598.7	1391.81	1692.9	1887.73	1774.39	1935.16	113.625
PMA1	1409.44	635.307	638.177	365.752	1701.97	2533.93	2027.92	2894.96	2032.41	3011.37	3431.86	1179.5	1331.04
CUP1-2	1388.87	1352.1	1412.79	365.752	1040.09	814.844	1256.56	699.383	1127.82	1977.62	1004.11	630.817	64.9287
YEF3	1384.47	1215.31	1284.56	3458.02	1985.63	1864.69	1760.43	2630.52	1992.87	1932.67	2407.12	2040.3	2321.2
BMH1	1363.9	1273.58	1258.46	365.752	945.537	1325.72	1231.68	1732.8	2637.01	2427.08	2640.95	1508.05	146.09
RPL13A	1352.15	1293.58	1382.59	66.5004	1229.2	1315.5	1293.89	1130.84	1304.55	1573.1	1389.25	1754.46	178.554
CUP1-1	1324.24	1379.75	1395.64	432.253	850.983	835.279	1163.25	852.482	1151.08	1438.27	1066.01	607.819	81.1609
RPS25B	1297.06	1295.8	1300.96	532.003	1134.64	1274.63	1405.86	1457.92	1551.05	1618.05	1581.82	1813.6	97.3931
EFT2	1291.19	936.047	980.005	498.753	756.43	1412.57	1262.78	1840.67	1527.79	1528.16	2035.74	1192.64	795.377
TEF4	1276.5	1152.84	1071.71	166.251	1134.64	1210.77	1175.69	1304.82	1188.28	809.025	1210.44	1406.2	470.733
HSP150	1252.26	1202.47	1203.67	0	1229.2	1108.6	945.532	1082.13	1881.26	3056.32	2544.67	745.81	259.715
RPL4B	1235.37	937.282	903.96	66.5004	1040.09	1129.03	1275.22	1276.98	820.869	943.863	935.338	1103.93	243.483
RPS27A	1206.73	1153.08	1148.87	133.001	1418.31	1134.14	1150.81	1228.27	1060.39	853.971	1017.87	1517.9	64.9287
RPL36A	1172.94	1300.74	1278.96	33.2502	1134.64	899.138	1076.17	883.798	486.01	359.567	371.384	1011.94	64.9287
ARF1	1160.45	1415.55	1387.07	1396.51	1796.52	940.008	827.341	998.622	1092.94	719.133	983.48	1343.77	48.6966
SSB2	1158.99	1156.05	1164.9	997.506	1985.63	1501.97	1443.18	1878.94	1041.78	764.079	907.828	1383.2	762.913
RPL14B	1154.58	1170.12	1164.9	764.755	1134.64	957.889	1032.62	1144.76	1523.14	2696.75	1905.06	1718.32	113.625
VMA3	1139.15	1060	1078.79	99.7506	1229.2	1803.39	1716.89	1819.79	1916.14	2112.45	2551.55	1143.36	340.876
MMF1	1134.75	1492.84	1381.1	399.002	756.43	991.095	964.194	1029.94	1444.08	764.079	1086.64	1186.07	194.786
MRH1	1108.31	1099.01	1078.42	133.001	1418.31	1167.35	1213.02	1611.02	1944.04	4224.91	2482.77	831.233	178.554
FPR1	1105.37	1208.15	1181.67	299.252	850.983	776.528	939.312	883.798	1016.2	898.917	949.093	1021.79	97.3931
RPS24B	1097.29	961.479	897.996	33.2502	1796.52	1136.69	1119.71	862.921	590.654	404.513	343.874	1008.65	146.09
NCE102	1092.15	681.233	665.762	0	1040.09	1011.53	926.871	970.786	1020.85	1303.43	1244.82	361.406	32.4644
GSP1	1076.73	1113.33	1075.81	133.001	1607.41	1144.36	901.988	1047.34	1109.22	809.025	873.441	1330.63	211.018
TRX2	1075.26	1131.85	1009.45	299.252	1040.09	738.213	790.017	765.494	1178.98	1842.78	1169.17	627.532	48.6966
RPL17B	1066.44	1062.22	1136.94	465.503	1985.63	1261.86	1474.28	1485.75	1485.94	1213.54	1561.19	1590.19	211.018
GAS1	1062.04	811.356	809.277	299.252	1229.2	1639.91	1293.89	1885.9	1420.82	1932.67	1609.33	1195.92	340.876
COF1	1045.14	1310.37	1259.95	432.253	1134.64	924.682	1045.06	1050.81	1137.12	1258.48	1121.03	1107.22	113.625
HXT3	1043.67	478.764	465.586	465.503	567.322	1402.35	1181.92	1134.32	630.186	674.188	680.871	1445.62	568.126
SNR38	1025.31	1006.91	914.771	0	661.876	848.051	727.811	901.196	690.646	584.296	797.788	883.801	227.251
EGD1	1024.58	1301.73	1319.97	33.2502	1229.2	988.541	1169.47	1123.88	1820.79	3056.32	2654.71	1337.2	146.09
ECM33	1005.48	787.406	767.155	99.7506	1134.64	1067.73	951.753	1266.55	1385.94	1977.62	1678.11	900.229	438.269
EGD2	998.137	1258.52	1246.16	0	1229.2	983.432	1013.96	1270.02	1497.56	3191.15	2138.9	1590.19	64.9287
RPL31B	992.996	923.702	1006.84	33.2502	756.43	894.029	1188.14	807.249	627.86	719.133	680.871	1002.08	16.2322
GCN4	981.979	846.912	776.101	33.2502	756.43	1279.74	1107.27	1513.59	1706.85	1932.67	2015.1	1163.07	243.483
TIF2	981.245	945.43	1004.23	199.501	945.537	1106.04	908.209	1057.77	1132.47	1123.65	852.808	1212.35	211.018
MBF1	970.962	638.023	612.084	133.001	472.769	1466.21	976.635	876.839	644.138	359.567	770.278	578.249	113.625
CIS3	957.742	842.714	767.9	133.001	945.537	978.324	1020.18	1033.42	1032.48	1168.59	955.97	1034.93	178.554
HTB2	950.397	670.122	644.514	33.2502	472.769	773.974	628.281	706.342	688.321	988.808	777.156	1826.74	113.625
RPS7B	932.036	987.405	962.857	99.7506	472.769	983.432	920.65	946.429	834.822	1033.75	914.705	1245.21	243.483
PMP3	915.877	894.566	881.221	99.7506	1134.64	1026.86	1113.49	831.605	1988.22	2067.51	1533.68	870.659	48.6966
RPL8A	901.923	1039.5	975.532	133.001	1040.09	1039.63	933.091	1103.01	978.997	764.079	983.48	1041.51	292.179
BGL2	893.109	952.097	940.119	33.2502	1418.31	1111.15	1306.33	1158.68	1409.2	1707.94	1540.56	768.809	81.1609
EFT1	892.374	706.418	770.882	432.253	1134.64	988.541	821.12	1109.97	511.59	269.675	378.262	532.252	681.752
RPL6B	890.171	869.134	883.831	365.752	1512.86	1154.58	1107.27	1148.24	1113.87	1258.48	1905.06	1324.06	405.805
SSA2	885.03	389.135	433.901	232.751	1040.09	1693.55	1617.36	2174.7	1204.56	1258.48	1265.46	1087.5	746.681
TRX1	865.934	999.01	990.442	498.753	661.876	763.757	765.135	678.506	779.012	1123.65	694.626	673.529	162.322
MFA1	854.182	174.568	177.064	0	0	733.104	746.473	250.525	241.842	269.675	123.795	174.132	0
PMP1	851.244	1069.87	1025.11	66.5004	1512.86	1466.21	1287.67	1322.22	1369.67	1483.21	1540.56	1071.08	146.09
RPS22B	849.041	891.85	895.759	2959.27	850.983	758.648	839.782	866.4	1316.18	1483.21	1066.01	1327.34	4934.58
PDR5	840.962	182.716	196.076	332.502	283.661	860.823	895.767	1057.77	134.874	224.729	144.427	308.838	1022.63
ACB1	820.397	1169.38	1193.6	33.2502	756.43	822.507	671.826	647.191	1011.55	719.133	763.401	699.813	97.3931
NOP10	820.397	917.282	949.811	665.004	283.661	738.213	951.753	591.518	732.504	809.025	529.566	929.799	16.2322
SUI1	815.256	990.121	1036.29	133.001	756.43	715.224	846.003	699.383	1206.89	1707.94	1286.09	979.081	81.1609
SNR44	814.521	869.628	863.701	2859.52	756.43	682.017	777.576	810.728	1185.96	1348.38	1038.5	1218.92	4902.12
HYP2	796.894	862.714	850.655	299.252	1418.31	1931.1	2233.2	1736.28	976.672	1213.54	928.46	1603.33	308.412
CTS1	793.956	466.666	451.048	33.2502	472.769	768.865	684.267	678.506	799.94	1483.21	1189.8	808.235	146.09
HXK2	790.284	1058.02	1079.53	565.254	1134.64	1098.38	989.077	1203.91	1504.54	1932.67	2028.86	676.815	146.09
NTF2	788.081	916.788	907.688	166.251	661.876	781.637	858.444	904.675	920.862	539.35	749.646	949.512	113.625
PFY1	782.205	987.899	917.38	332.502	756.43	648.81	696.708	681.986	844.123	719.133	735.891	604.533	64.9287
PDI1	771.922	769.381	733.978	33.2502	283.661	653.919	634.502	814.208	723.202	404.513	598.341	496.112	129.857
PMP2	769.719	789.134	748.889	465.503	1418.31	2347.47	1418.3	1169.12	2167.28	1618.05	2358.98	1327.34	113.625
HSP104	755.764	687.159	728.014	66.5004	661.876	676.908	821.12	720.261	725.527	674.188	722.136	39.4261	146.09
HSP10	748.419	588.394	614.32	33.2502	567.322	638.592	516.31	584.559	404.621	314.621	247.589	436.972	48.6966
TMA7	748.419	743.208	778.711	1030.76	567.322	738.213	846.003	636.752	744.131	539.35	584.586	657.101	16.2322
GIS2	732.261	780.492	774.237	465.503	1040.09	623.266	653.164	688.945	1467.33	988.808	1320.48	1153.21	0
PNC1	731.527	937.035	965.467	66.5004	567.322	503.211	740.252	483.653	555.773	314.621	502.056	39.4261	0
SEC53	731.527	617.283	608.729	1197.01	189.107	628.375	646.943	678.506	997.6	764.079	907.828	857.517	129.857
SNU13	726.385	668.147	728.76	66.5004	661.876	513.428	615.84	608.916	674.368	494.404	598.341	1192.64	97.3931
IPP1	720.51	889.381	908.806	0	945.537	827.616	995.297	849.003	441.828	404.513	316.364	594.677	211.018
YOP1	711.696	832.838	712.358	266.002	378.215	643.701	659.384	591.518	353.462	224.729	295.732	387.69	64.9287
SND3	704.352	679.258	671.354	1064.01	756.43	1126.48	1213.02	1012.54	423.224	719.133	302.609	637.388	64.9287
HSP30	703.617	173.58	164.39	33.2502	189.107	574.733	709.149	716.781	311.605	404.513	392.017	36.1406	0
TDH1	679.38	2000.98	1986.48	33.2502	1796.52	955.334	964.194	911.634	1269.67	1618.05	1279.21	29.5696	81.1609
GLN1	677.911	2249.62	2125.52	66.5004	1512.86	546.635	646.943	654.15	2857.93	4045.13	3204.91	542.109	486.966
OLA1	677.911	566.172	587.481	166.251	472.769	717.778	665.605	741.138	576.701	494.404	398.894	647.245	162.322
RPL9B	672.035	577.283	558.405	365.752	945.537	702.452	814.9	765.494	483.685	359.567	385.139	634.103	340.876
RTN1	668.363	541.727	568.47	66.5004	756.43	518.537	435.443	511.489	518.566	359.567	495.179	476.399	81.1609
SSA1	661.753	555.801	606.119	133.001	1134.64	1098.38	1331.21	1363.97	506.939	584.296	467.669	312.123	405.805
TIF1	661.018	696.542	772.373	698.254	1040.09	1129.03	1337.43	1141.28	1334.78	1977.62	1973.84	1002.08	422.037
SSS1	658.815	762.467	801.449	0	283.661	569.624	603.399	570.641	623.209	629.242	591.464	634.103	48.6966
YRB1	652.939	817.035	780.947	698.254	945.537	740.767	895.767	678.506	560.423	449.458	508.934	923.228	48.6966
SRL1	649.267	410.123	418.617	0	472.769	554.298	335.913	577.6	941.79	1842.78	1182.93	532.252	113.625
UBC4	630.905	607.159	611.338	33.2502	1229.2	564.516	671.826	664.588	423.224	584.296	419.527	620.961	48.6966
SAH1	622.826	698.023	724.287	66.5004	472.769	595.168	416.781	643.711	632.511	1393.32	763.401	634.103	129.857
STE2	622.092	454.567	479.006	33.2502	283.661	528.755	584.737	622.834	455.78	539.35	474.546	390.975	97.3931
POR1	616.216	965.677	895.014	33.2502	1229.2	538.972	572.296	581.08	811.568	809.025	811.543	289.125	146.09
SSE1	614.747	389.876	425.327	365.752	378.215	554.298	671.826	702.863	581.352	404.513	770.278	509.254	308.412
TIP1	611.809	952.097	893.523	0	567.322	538.972	460.325	434.94	1153.4	1887.73	1519.92	397.546	32.4644
CDC33	605.933	685.924	632.959	299.252	756.43	592.614	547.413	591.518	685.995	674.188	584.586	814.806	81.1609
SSC1	604.464	483.209	511.809	66.5004	283.661	664.136	516.31	681.986	453.455	404.513	460.791	279.268	324.644
YHB1	591.978	1075.55	1087.36	631.754	945.537	533.863	603.399	570.641	469.732	539.35	371.384	525.681	146.09
STF2	589.041	1456.29	1394.15	99.7506	1040.09	467.45	534.972	386.227	1037.13	1483.21	1203.56	55.8536	32.4644
BAT1	586.103	514.073	470.059	133.001	378.215	556.853	478.987	675.027	1448.73	853.971	1258.58	551.965	48.6966
CYS4	581.696	588.888	636.313	33.2502	567.322	541.526	478.987	619.354	574.376	494.404	563.954	571.678	162.322
KRS1	575.82	598.764	589.718	199.501	189.107	722.887	609.62	748.097	502.288	269.675	392.017	699.813	178.554
TIF11	575.82	759.504	748.144	199.501	189.107	618.157	528.752	626.314	530.193	1078.7	570.831	732.668	32.4644
SUB2	574.351	529.628	556.169	565.254	850.983	625.821	615.84	810.728	697.623	134.838	557.076	913.371	129.857
SES1	563.334	576.542	605.001	332.502	850.983	447.015	528.752	636.752	351.137	269.675	330.119	450.114	32.4644
HSP82	561.131	253.086	245.281	365.752	283.661	449.569	590.958	546.285	160.453	0	96.2848	95.2797	48.6966
YDL124W	560.396	607.406	560.269	0	661.876	421.471	547.413	393.186	404.621	314.621	336.997	39.4261	32.4644
LSP1	558.928	722.468	776.847	0	567.322	401.036	559.855	434.94	444.153	269.675	302.609	144.562	0
MPC2	558.928	780.986	768.646	1030.76	378.215	521.091	497.649	504.53	318.581	629.242	261.344	502.683	16.2322
SBA1	555.99	704.443	685.146	432.253	378.215	426.58	466.546	518.448	779.012	179.783	907.828	482.97	113.625
APE3	553.786	436.789	480.497	66.5004	1229.2	876.149	939.312	970.786	713.9	314.621	405.772	785.236	81.1609
OYE2	545.707	573.579	591.209	365.752	283.661	490.439	423.001	598.477	513.915	539.35	515.811	473.113	129.857
VTC1	543.504	1179.5	1189.87	66.5004	1512.86	523.646	534.972	455.817	946.441	809.025	1017.87	663.672	113.625
CCW14	539.831	484.196	456.64	33.2502	567.322	495.548	385.678	372.309	744.131	1168.59	942.215	381.119	0
MFA2	539.831	270.617	275.475	33.2502	945.537	628.375	808.679	309.677	725.527	1887.73	660.239	377.833	32.4644
YDJ1	539.097	241.728	271.374	399.002	94.5537	610.494	534.972	702.863	348.811	494.404	199.447	614.39	48.6966
TAL1	536.159	654.32	552.814	232.751	661.876	485.33	528.752	598.477	509.264	359.567	488.301	394.261	178.554
ADK1	534.69	689.381	635.568	532.003	945.537	689.68	889.547	890.757	1137.12	853.971	1244.82	765.523	146.09
PIL1	531.018	439.999	432.037	0	472.769	426.58	373.236	521.928	462.756	89.8917	412.649	282.554	113.625
IMD4	527.346	337.53	341.827	365.752	378.215	513.428	391.898	528.887	288.351	314.621	171.937	597.962	422.037
KAR2	522.939	281.975	293.74	99.7506	283.661	822.507	653.164	880.318	420.899	404.513	419.527	308.838	227.251
HOM2	522.204	627.9	643.023	931.006	189.107	487.885	454.104	598.477	699.948	629.242	715.258	381.119	178.554
VMA4	522.204	636.542	667.253	66.5004	567.322	602.831	603.399	563.682	353.462	359.567	385.139	535.538	64.9287
ARC1	519.266	478.271	467.45	99.7506	189.107	457.232	566.075	532.366	455.78	179.783	543.321	463.257	97.3931
GLK1	512.656	639.999	678.809	33.2502	189.107	485.33	205.28	135.701	695.297	359.567	845.931	29.5696	162.322
SIS1	511.922	243.95	222.542	199.501	0	590.059	553.634	622.834	265.097	89.8917	268.222	154.419	32.4644
THS1	509.718	427.406	432.41	1030.76	567.322	607.94	497.649	755.056	451.129	269.675	440.159	624.246	243.483
GND1	506.046	465.925	444.338	332.502	94.5537	500.656	404.339	563.682	583.677	539.35	536.444	354.835	178.554
NSR1	506.046	434.32	421.227	432.253	1040.09	462.341	485.207	542.805	290.676	224.729	240.712	903.515	146.09
SAM1	506.046	480.74	448.812	365.752	378.215	370.384	404.339	438.419	413.923	719.133	488.301	591.391	113.625
GUK1	504.577	439.999	441.356	299.252	189.107	533.863	416.781	553.244	351.137	359.567	165.06	630.817	32.4644
ZUO1	499.436	475.061	441.356	0	378.215	584.951	541.193	581.08	376.716	134.838	295.732	663.672	81.1609
URA1	498.701	759.998	711.985	1562.76	472.769	477.667	472.766	389.706	662.741	629.242	612.096	1366.77	0
SML1	497.967	475.554	498.39	33.2502	283.661	357.612	279.927	257.484	409.272	584.296	295.732	335.122	81.1609
EXG1	489.153	488.394	475.278	99.7506	378.215	536.418	410.56	588.039	658.091	404.513	742.768	597.962	162.322
TRR1	489.153	450.616	459.622	232.751	283.661	434.243	367.016	514.969	425.55	269.675	426.404	492.826	64.9287
SCW10	484.012	304.691	294.859	66.5004	472.769	500.656	510.09	441.899	523.217	943.863	646.484	551.965	64.9287
LEU1	482.543	212.098	252.363	266.002	0	462.341	510.09	445.379	309.279	719.133	405.772	223.414	178.554
HOM6	476.668	508.641	478.26	465.503	661.876	538.972	522.531	560.203	365.089	404.513	261.344	450.114	48.6966
ASN2	471.526	350.123	332.508	532.003	472.769	424.025	416.781	490.612	376.716	89.8917	240.712	413.974	64.9287
ERV25	471.526	445.925	417.499	532.003	756.43	470.004	510.09	396.665	302.303	314.621	261.344	390.975	48.6966
TKL1	471.526	454.32	450.675	232.751	1040.09	383.155	379.457	681.986	623.209	898.917	653.361	551.965	194.786
NOP1	470.792	345.678	357.111	33.2502	472.769	559.407	416.781	622.834	497.637	224.729	495.179	795.093	48.6966
SSZ1	467.854	383.209	378.359	731.505	378.215	426.58	404.339	594.998	358.113	494.404	254.467	542.109	129.857
HSP60	467.119	240.987	234.471	199.501	189.107	551.744	485.207	588.039	302.303	89.8917	343.874	252.984	194.786
TIM10	467.119	658.27	677.318	0	189.107	393.373	410.56	375.788	553.447	449.458	467.669	427.116	48.6966
DED81	465.651	413.579	434.274	66.5004	472.769	464.895	441.663	542.805	474.383	359.567	502.056	525.681	178.554
ADO1	464.916	418.765	393.269	598.504	472.769	408.699	348.354	490.612	569.725	494.404	577.709	545.394	48.6966
SBH2	464.916	501.48	524.111	798.005	189.107	452.123	609.62	323.595	318.581	494.404	288.854	420.545	32.4644
VMA10	461.978	732.838	783.184	66.5004	0	482.776	678.046	407.104	392.994	449.458	467.669	394.261	97.3931
EMP24	459.775	431.851	390.66	299.252	567.322	444.46	435.443	508.01	320.906	269.675	295.732	361.406	48.6966
ERG3	459.775	329.876	352.265	166.251	94.5537	464.895	441.663	459.297	483.685	539.35	488.301	519.11	129.857
YRA1	459.04	484.69	448.066	232.751	94.5537	526.2	572.296	542.805	430.201	314.621	419.527	542.109	48.6966
GUA1	457.571	289.135	275.475	399.002	283.661	388.264	485.207	441.899	353.462	179.783	247.589	581.535	162.322
PDA1	457.571	386.419	421.972	33.2502	472.769	464.895	478.987	525.407	490.661	314.621	502.056	305.552	178.554
BMH2	456.103	551.851	509.2	33.2502	283.661	306.524	298.589	365.35	448.804	449.458	653.361	318.694	16.2322
ATP2	452.43	873.578	865.192	0	567.322	610.494	230.162	445.379	837.147	539.35	729.013	338.407	81.1609
CBR1	450.227	369.876	373.885	465.503	189.107	531.309	566.075	434.94	181.382	44.9458	123.795	259.555	81.1609
NOP56	449.492	416.295	377.986	99.7506	472.769	439.352	398.119	400.145	479.034	269.675	543.321	637.388	97.3931
UTH1	448.758	358.518	351.147	99.7506	756.43	1233.76	1032.62	1047.34	965.044	1393.32	1396.13	929.799	243.483
YPL225W	448.758	482.221	438.001	166.251	283.661	355.057	360.795	421.022	246.493	44.9458	281.977	328.551	32.4644
RGI1	448.023	438.518	414.89	33.2502	283.661	227.339	298.589	180.935	402.296	314.621	295.732	9.85652	16.2322
ERG11	445.82	465.925	435.019	0	189.107	278.426	354.575	525.407	618.559	449.458	618.974	417.259	97.3931
ADH3	445.086	411.604	395.506	565.254	283.661	467.45	373.236	494.092	685.995	179.783	529.566	410.688	162.322
SGT2	445.086	366.666	392.897	399.002	283.661	464.895	485.207	584.559	497.637	359.567	515.811	361.406	64.9287
UGP1	442.882	597.776	558.032	133.001	378.215	523.646	410.56	497.571	497.637	449.458	350.752	157.704	81.1609
ILV5	441.413	624.937	631.84	166.251	567.322	590.059	603.399	685.465	897.608	719.133	1341.11	860.803	373.34
YPT1	440.679	464.443	425.327	399.002	283.661	311.633	547.413	354.911	320.906	134.838	350.752	410.688	64.9287
GRS1	439.944	352.345	372.394	166.251	189.107	454.678	385.678	459.297	483.685	404.513	433.282	443.543	113.625
RNR4	439.21	589.875	617.302	133.001	472.769	556.853	423.001	539.326	469.732	224.729	330.119	410.688	97.3931
NHP2	438.475	468.888	457.012	232.751	378.215	370.384	404.339	511.489	595.305	584.296	632.729	758.952	32.4644
YBR085C-A	437.006	390.863	366.803	0	283.661	383.155	391.898	330.554	411.597	359.567	412.649	111.707	32.4644
SAR1	434.069	474.567	479.751	66.5004	472.769	482.776	311.03	358.391	276.724	179.783	302.609	390.975	64.9287
RPL18B	431.131	236.296	213.968	166.251	283.661	355.057	385.678	431.46	188.358	44.9458	144.427	538.823	64.9287
VOA1	429.662	395.308	389.169	399.002	472.769	526.2	640.723	514.969	518.566	404.513	577.709	371.262	48.6966
CHA1	428.193	358.765	347.419	0	567.322	375.492	391.898	407.104	358.113	89.8917	302.609	824.662	64.9287
THR4	428.193	345.678	332.508	66.5004	94.5537	365.275	335.913	313.157	318.581	314.621	226.957	249.699	146.09
HNT1	427.458	420.246	405.571	66.5004	283.661	398.482	534.972	295.759	267.422	314.621	281.977	282.554	64.9287
IDH2	423.052	263.209	247.145	0	94.5537	434.243	447.884	421.022	151.152	314.621	165.06	82.1377	32.4644
HPT1	422.317	455.061	438.747	332.502	189.107	352.503	385.678	361.87	341.835	674.188	385.139	699.813	48.6966
RHO1	422.317	531.11	534.921	166.251	850.983	470.004	423.001	480.174	358.113	314.621	378.262	397.546	16.2322
PRC1	420.114	395.308	396.624	133.001	378.215	398.482	435.443	539.326	530.193	494.404	612.096	180.703	64.9287
SUI3	419.379	498.517	533.43	99.7506	378.215	352.503	317.251	431.46	581.352	404.513	453.914	532.252	64.9287
UTR2	419.379	404.937	390.287	232.751	378.215	286.089	186.618	292.28	432.526	314.621	557.076	433.687	81.1609
PDB1	418.645	371.851	369.412	0	94.5537	567.07	466.546	452.338	244.168	359.567	171.937	341.693	32.4644
YLR257W	412.035	551.357	580.398	33.2502	378.215	337.177	460.325	407.104	334.859	224.729	350.752	131.42	64.9287
HSP42	411.3	224.691	227.761	0	94.5537	283.535	404.339	323.595	109.294	89.8917	171.937	6.57101	16.2322
HXT2	410.566	429.629	433.901	133.001	756.43	538.972	478.987	508.01	806.917	988.808	935.338	364.691	64.9287
SMT3	406.893	517.283	530.448	0	189.107	385.71	404.339	361.87	390.669	314.621	288.854	390.975	64.9287
SNR54	405.424	289.629	274.729	133.001	189.107	367.829	242.604	396.665	160.453	179.783	82.5298	364.691	211.018
CMD1	401.752	497.53	488.698	0	378.215	319.296	379.457	299.239	267.422	359.567	178.815	351.549	32.4644
GUS1	401.752	384.691	430.546	465.503	378.215	505.765	454.104	619.354	272.073	134.838	206.325	341.693	113.625
RIM1	401.018	397.777	432.41	0	283.661	311.633	385.678	340.993	386.018	179.783	281.977	302.267	16.2322
STI1	399.549	164.197	176.319	0	378.215	362.721	379.457	327.075	83.7147	44.9458	103.162	154.419	48.6966
TIF34	398.08	336.296	339.218	99.7506	94.5537	362.721	404.339	292.28	255.795	314.621	220.08	381.119	48.6966
YNL208W	398.08	641.727	636.313	166.251	189.107	337.177	360.795	414.063	734.829	584.296	797.788	256.27	97.3931
CYS3	397.345	349.382	351.892	0	378.215	393.373	236.383	400.145	402.296	224.729	447.036	318.694	16.2322
ARF2	396.611	502.715	477.142	33.2502	661.876	355.057	354.575	313.157	374.391	314.621	330.119	341.693	64.9287
VMA13	396.611	378.518	387.305	232.751	378.215	319.296	385.678	361.87	113.945	179.783	144.427	144.562	64.9287
ADE13	395.876	717.282	685.519	432.253	189.107	390.819	510.09	462.776	869.703	494.404	715.258	597.962	64.9287
ERG2	393.673	375.308	400.352	133.001	0	349.949	534.972	490.612	590.654	539.35	694.626	499.397	32.4644
SBP1	392.204	557.283	516.282	166.251	661.876	337.177	354.575	393.186	492.987	314.621	508.934	282.554	32.4644
YGP1	392.204	438.024	436.138	0	472.769	252.883	292.369	299.239	388.343	269.675	281.977	36.1406	16.2322
RPO26	387.063	446.913	417.872	99.7506	472.769	227.339	335.913	236.607	376.716	314.621	357.629	361.406	64.9287
ARO4	385.594	535.061	547.968	0	472.769	365.275	429.222	462.776	618.559	224.729	557.076	476.399	32.4644
TPS1	384.859	372.345	415.635	66.5004	378.215	316.742	429.222	375.788	190.683	314.621	185.692	39.4261	64.9287
QCR8	383.391	522.715	473.041	365.752	0	293.753	404.339	281.841	467.407	584.296	584.586	233.271	0
PAA1	381.187	459.258	434.274	66.5004	378.215	270.763	354.575	365.35	274.398	404.513	199.447	262.841	48.6966
SUP45	379.718	406.913	415.263	332.502	283.661	454.678	410.56	574.121	744.131	449.458	412.649	650.53	113.625
CPR6	378.984	198.024	227.015	66.5004	472.769	441.906	460.325	424.501	220.914	89.8917	151.305	318.694	81.1609
PYP1	378.984	487.653	441.729	133.001	378.215	395.927	348.354	316.636	390.669	404.513	330.119	443.543	48.6966
TOM6	378.984	371.11	427.191	66.5004	189.107	286.089	248.824	205.292	502.288	494.404	268.222	180.703	48.6966
TPM1	376.78	536.542	527.465	299.252	189.107	252.883	311.03	281.841	272.073	134.838	261.344	282.554	48.6966
BAP2	367.967	109.876	136.806	166.251	0	554.298	491.428	577.6	153.477	0	123.795	236.557	178.554
VMA7	366.498	478.517	495.408	731.505	283.661	421.471	609.62	542.805	323.232	269.675	213.202	289.125	32.4644
YSY6	362.826	367.407	358.229	465.503	189.107	275.872	410.56	285.321	311.605	539.35	350.752	305.552	16.2322
CMK2	361.357	200	189.366	33.2502	94.5537	227.339	304.81	427.981	232.541	314.621	233.834	39.4261	64.9287
CPR5	360.622	348.394	344.064	299.252	378.215	441.906	478.987	414.063	367.415	224.729	316.364	318.694	16.2322
ALD6	359.888	346.419	331.763	66.5004	189.107	357.612	447.884	473.215	402.296	449.458	364.507	450.114	113.625
RPL7B	359.888	266.172	266.901	66.5004	189.107	319.296	279.927	285.321	162.779	314.621	103.162	315.409	81.1609
PEP4	358.419	450.369	459.622	133.001	567.322	344.84	317.251	501.051	667.392	853.971	488.301	98.5652	81.1609
RPB10	358.419	364.197	370.531	0	189.107	257.991	379.457	198.333	220.914	134.838	110.04	374.548	16.2322
YET1	358.419	442.221	442.102	0	189.107	260.546	360.795	226.169	299.978	269.675	247.589	108.422	16.2322
ABF2	356.95	355.802	352.265	0	472.769	372.938	348.354	285.321	253.47	449.458	330.119	236.557	64.9287
SPI1	351.809	374.32	387.305	0	283.661	245.219	335.913	208.771	239.517	314.621	261.344	16.4275	0
TIF35	351.809	355.061	337.354	798.005	378.215	306.524	360.795	354.911	262.771	134.838	261.344	440.258	16.2322
SEM1	350.34	423.703	403.334	266.002	661.876	283.535	273.707	299.239	406.946	449.458	350.752	193.845	16.2322
ELO3	349.605	253.333	229.252	199.501	283.661	521.091	335.913	476.694	481.36	494.404	364.507	548.68	113.625
TUB2	348.871	299.752	260.937	133.001	0	298.861	199.059	194.853	262.771	359.567	240.712	226.7	129.857
ERG25	348.136	354.32	348.91	0	189.107	314.187	230.162	274.882	395.319	269.675	350.752	335.122	0
IMD3	348.136	320.987	355.993	66.5004	283.661	342.286	311.03	396.665	425.55	584.296	295.732	407.403	113.625
FRS1	347.402	268.888	296.35	332.502	378.215	362.721	367.016	334.034	318.581	449.458	309.487	269.412	48.6966
SNA3	347.402	465.184	449.184	0	378.215	303.97	286.148	222.689	395.319	404.513	364.507	216.843	16.2322
ERG20	346.667	399.752	385.068	299.252	283.661	219.676	342.133	320.116	148.826	179.783	137.55	183.988	32.4644
ILS1	346.667	271.604	281.812	731.505	283.661	472.558	404.339	567.162	369.74	404.513	275.099	427.116	340.876
ARO2	345.933	365.678	376.495	365.752	283.661	309.079	267.486	462.776	367.415	449.458	275.099	489.541	48.6966
CDC48	345.198	359.752	338.1	266.002	378.215	421.471	360.795	389.706	413.923	134.838	398.894	216.843	81.1609
ERG4	344.464	242.222	234.098	365.752	94.5537	416.362	279.927	382.747	283.7	359.567	288.854	282.554	16.2322
PRS1	344.464	229.629	247.145	133.001	189.107	355.057	404.339	427.981	195.334	44.9458	158.182	407.403	97.3931
PRE9	342.995	397.53	378.359	99.7506	189.107	360.166	323.472	281.841	288.351	449.458	178.815	249.699	97.3931
TOS1	341.526	313.58	272.493	0	850.983	490.439	335.913	549.764	688.321	1033.75	955.97	420.545	194.786
VMA6	341.526	374.814	366.803	166.251	378.215	314.187	516.31	567.162	102.318	134.838	96.2848	131.42	146.09
ILV3	338.588	428.641	432.037	232.751	850.983	413.808	329.692	480.174	641.813	404.513	550.199	436.972	324.644
MEO1	338.588	472.592	437.256	399.002	94.5537	388.264	416.781	128.742	365.089	134.838	433.282	203.701	81.1609
SAM4	338.588	310.864	277.712	99.7506	94.5537	260.546	261.266	323.595	330.208	314.621	398.894	407.403	81.1609
RET3	337.854	369.876	348.537	133.001	283.661	332.068	472.766	320.116	223.239	269.675	185.692	236.557	32.4644
ERG6	337.119	390.37	374.258	232.751	567.322	298.861	286.148	438.419	413.923	449.458	288.854	469.828	32.4644
SCS2	337.119	304.444	296.723	99.7506	0	291.198	367.016	257.484	274.398	134.838	247.589	256.27	16.2322
TYS1	337.119	310.617	321.325	33.2502	94.5537	319.296	317.251	375.788	320.906	269.675	275.099	482.97	32.4644
PHO3	336.385	137.037	131.587	33.2502	94.5537	309.079	317.251	323.595	146.501	314.621	103.162	183.988	81.1609
SBH1	336.385	319.999	335.863	66.5004	189.107	329.514	286.148	222.689	299.978	269.675	247.589	351.549	81.1609
CAM1	331.244	299.999	277.712	99.7506	378.215	439.352	323.472	403.624	283.7	224.729	199.447	282.554	64.9287
ACO1	329.04	249.629	248.636	199.501	283.661	280.981	385.678	396.665	423.224	719.133	522.689	91.9942	227.251
HXT7	328.306	1261.73	1299.47	99.7506	1229.2	362.721	404.339	494.092	2876.53	3730.5	3768.86	16.4275	16.2322
FCY1	327.571	417.53	360.466	133.001	378.215	311.633	385.678	375.788	590.654	674.188	639.606	525.681	178.554
IRC22	326.102	246.419	259.819	365.752	0	416.362	304.81	379.268	251.144	89.8917	192.57	216.843	0
PIR1	326.102	299.752	278.83	0	378.215	349.949	273.707	396.665	444.153	629.242	529.566	321.98	97.3931
CWP1	325.368	235.308	249.008	33.2502	378.215	247.774	248.824	226.169	181.382	224.729	220.08	114.993	0
ERG10	324.633	346.666	317.97	698.254	283.661	319.296	255.045	386.227	383.692	359.567	261.344	361.406	162.322
GDH1	324.633	471.604	470.059	831.255	94.5537	334.622	261.266	393.186	311.605	269.675	226.957	492.826	113.625
PET9	323.899	562.468	526.347	66.5004	661.876	462.341	335.913	375.788	797.615	1483.21	935.338	384.404	64.9287
RPL22B	323.899	276.049	269.511	0	0	275.872	242.604	215.73	255.795	179.783	233.834	285.839	32.4644
PRE2	323.164	334.567	304.178	465.503	283.661	201.795	236.383	240.087	230.215	134.838	199.447	183.988	81.1609
DPS1	322.43	315.308	328.035	33.2502	378.215	352.503	342.133	469.735	260.446	269.675	206.325	305.552	129.857
TIF3	321.695	335.555	309.397	299.252	283.661	326.959	342.133	427.981	660.416	719.133	687.748	673.529	64.9287
VMA11	321.695	449.629	459.995	33.2502	567.322	564.516	460.325	574.121	492.987	404.513	316.364	390.975	0
PHO84	320.961	1156.05	1195.84	0	1512.86	286.089	298.589	368.829	1578.95	1573.1	1808.78	821.377	308.412
YNK1	320.961	452.838	458.504	66.5004	378.215	324.405	298.589	340.993	330.208	314.621	275.099	190.559	16.2322
FCY2	320.227	286.913	265.783	99.7506	283.661	416.362	311.03	365.35	318.581	224.729	226.957	781.951	178.554
PFK1	320.227	323.95	326.171	199.501	472.769	472.558	398.119	542.805	481.36	809.025	646.484	341.693	308.412
SCL1	320.227	374.814	373.14	66.5004	283.661	255.437	311.03	247.046	248.819	179.783	178.815	197.13	32.4644
ATP15	319.492	394.073	473.414	0	283.661	326.959	348.354	229.648	311.605	898.917	178.815	243.128	0
GRX1	319.492	411.851	389.169	33.2502	283.661	237.556	298.589	243.566	381.367	584.296	261.344	121.564	0
GPD1	318.023	346.172	351.147	0	189.107	242.665	354.575	313.157	502.288	314.621	440.159	32.8551	32.4644
OLE1	318.023	753.579	769.391	498.753	1418.31	311.633	435.443	494.092	1051.08	1168.59	1114.15	275.983	146.09
GAR1	317.289	345.925	319.834	465.503	283.661	275.872	329.692	379.268	465.082	449.458	687.748	670.243	64.9287
SNR59	317.289	246.172	241.18	0	189.107	245.219	217.721	229.648	109.294	224.729	82.5298	226.7	64.9287
GET3	315.085	334.32	323.562	166.251	189.107	326.959	311.03	337.513	144.175	224.729	130.672	351.549	64.9287
RDL1	314.351	449.382	449.184	232.751	189.107	326.959	441.663	358.391	325.557	224.729	295.732	187.274	48.6966
HXK1	313.616	1441.48	1450.06	33.2502	1323.75	201.795	223.942	194.853	1244.09	1033.75	1100.4	3.28551	113.625
VPH1	312.882	232.839	240.435	432.253	94.5537	546.635	367.016	365.35	165.104	179.783	178.815	239.842	178.554
YET3	312.882	387.653	385.441	0	189.107	378.047	404.339	267.923	344.16	404.513	343.874	134.706	64.9287
HXT1	311.413	37.5308	41.0044	199.501	94.5537	360.166	236.383	236.607	58.1352	179.783	55.0199	597.962	48.6966
YJR120W	309.944	680.492	648.615	0	283.661	321.851	80.8679	267.923	358.113	314.621	474.546	154.419	64.9287
RPS14B	307.006	225.925	221.424	166.251	283.661	424.025	410.56	288.8	237.192	134.838	213.202	394.261	64.9287
ZRC1	305.537	206.666	174.082	299.252	94.5537	309.079	279.927	351.431	246.493	224.729	206.325	275.983	64.9287
DDR48	304.803	589.875	621.03	66.5004	756.43	291.198	267.486	313.157	455.78	539.35	405.772	59.1391	64.9287
HCH1	304.068	169.382	171.1	166.251	0	237.556	304.81	313.157	83.7147	44.9458	158.182	167.561	64.9287
SHR3	304.068	349.629	337.727	365.752	0	444.46	398.119	309.677	239.517	314.621	233.834	367.977	0
APA1	303.334	274.567	289.64	0	0	209.458	255.045	250.525	193.009	44.9458	206.325	200.416	32.4644
YLR179C	303.334	237.037	252.363	133.001	283.661	413.808	516.31	393.186	202.311	134.838	178.815	246.413	97.3931
VAS1	301.865	263.95	272.493	764.755	189.107	370.384	367.016	532.366	353.462	404.513	261.344	351.549	162.322
ASN1	301.13	477.036	523.365	232.751	283.661	301.416	155.515	320.116	444.153	494.404	460.791	456.686	340.876
PRE1	300.396	334.567	310.515	33.2502	472.769	196.686	329.692	254.005	362.764	224.729	398.894	203.701	64.9287
TIF5	299.662	247.407	263.174	332.502	283.661	334.622	273.707	382.747	439.502	89.8917	336.997	627.532	48.6966
HIS1	298.927	488.641	458.131	399.002	567.322	413.808	391.898	417.542	372.065	449.458	371.384	502.683	113.625
PST2	298.927	375.061	357.856	99.7506	283.661	298.861	248.824	257.484	325.557	224.729	343.874	246.413	64.9287
GRX2	298.193	411.851	398.115	0	94.5537	204.35	236.383	236.607	546.471	584.296	563.954	118.278	0
YRO2	298.193	319.505	307.533	0	567.322	314.187	367.016	306.198	495.312	359.567	453.914	26.2841	0
PGA3	296.724	234.32	229.625	99.7506	189.107	240.111	323.472	226.169	160.453	269.675	123.795	216.843	48.6966
VMA8	296.724	389.876	377.986	432.253	189.107	301.416	255.045	396.665	267.422	134.838	261.344	344.978	0
ERV14	295.989	305.431	321.325	199.501	94.5537	291.198	279.927	309.677	251.144	179.783	220.08	377.833	64.9287
ADE12	295.255	435.555	433.901	66.5004	378.215	329.514	248.824	229.648	537.169	674.188	701.503	252.984	64.9287
CAF20	293.786	311.851	311.633	133.001	378.215	355.057	391.898	379.268	353.462	584.296	426.404	381.119	0
HMO1	293.051	375.061	353.756	33.2502	283.661	291.198	329.692	194.853	258.12	224.729	254.467	394.261	48.6966
FAS2	292.317	226.419	237.825	266.002	378.215	390.819	354.575	469.735	174.406	134.838	171.937	197.13	665.52
NPL3	292.317	345.678	337.727	33.2502	661.876	268.209	186.618	330.554	648.789	449.458	632.729	423.83	64.9287
PRE5	292.317	300.74	296.35	0	661.876	186.469	273.707	271.403	183.707	44.9458	178.815	220.129	16.2322
RPB8	292.317	256.79	251.991	33.2502	189.107	235.002	211.501	254.005	246.493	269.675	240.712	466.542	32.4644
VMA9	292.317	424.69	373.885	66.5004	283.661	194.132	255.045	257.484	316.256	224.729	240.712	374.548	16.2322
CRH1	290.848	243.456	218.069	133.001	94.5537	250.328	199.059	222.689	311.605	359.567	281.977	174.132	81.1609
PUP2	290.848	332.345	314.243	299.252	189.107	250.328	273.707	285.321	130.223	179.783	89.4073	226.7	16.2322
RPN8	290.114	295.802	278.084	432.253	189.107	278.426	286.148	330.554	230.215	269.675	171.937	282.554	97.3931
ARB1	288.645	227.16	260.937	133.001	661.876	275.872	261.266	379.268	179.056	89.8917	96.2848	249.699	194.786
LSM6	288.645	290.37	238.571	299.252	283.661	232.448	161.736	83.5085	195.334	224.729	165.06	91.9942	16.2322
TPS2	288.645	195.555	199.803	0	472.769	311.633	261.266	358.391	202.311	89.8917	220.08	9.85652	146.09
ATP18	287.91	453.826	442.847	0	567.322	227.339	304.81	240.087	520.891	539.35	412.649	443.543	0
OST1	287.91	243.703	244.908	266.002	283.661	375.492	335.913	393.186	190.683	179.783	158.182	233.271	97.3931
RIB4	287.91	596.542	578.907	33.2502	850.983	349.949	298.589	354.911	341.835	224.729	268.222	522.396	16.2322
SPO24	287.176	188.642	210.613	0	94.5537	283.535	435.443	313.157	260.446	269.675	171.937	108.422	16.2322
FRS2	286.441	194.321	187.502	0	94.5537	296.307	211.501	316.636	288.351	134.838	275.099	243.128	16.2322
MLC1	285.707	252.839	254.6	33.2502	189.107	245.219	161.736	233.128	120.921	134.838	185.692	256.27	32.4644
PRE6	284.238	334.814	320.952	66.5004	567.322	183.915	186.618	212.251	193.009	134.838	213.202	246.413	16.2322
SCW4	283.503	263.703	237.825	0	1229.2	722.887	783.797	678.506	632.511	674.188	557.076	328.551	162.322
ECM15	282.034	338.765	337.727	266.002	378.215	255.437	248.824	219.21	225.565	404.513	199.447	187.274	32.4644
SVS1	282.034	190.617	184.147	0	378.215	242.665	192.839	201.812	151.152	224.729	144.427	183.988	16.2322
VMA1	282.034	260.74	242.299	864.505	283.661	416.362	292.369	427.981	327.883	224.729	254.467	236.557	486.966
RFS1	281.3	356.542	371.276	99.7506	189.107	189.023	298.589	274.882	162.779	134.838	158.182	49.2826	48.6966
SUI2	280.565	285.678	271.747	33.2502	945.537	247.774	323.472	302.718	279.049	269.675	281.977	344.978	0
WTM1	279.831	295.061	296.723	33.2502	189.107	301.416	373.236	267.923	265.097	134.838	261.344	128.135	97.3931
INA1	279.097	296.049	273.611	33.2502	283.661	293.753	223.942	285.321	404.621	89.8917	323.242	302.267	146.09
URA5	279.097	315.555	299.332	232.751	567.322	495.548	367.016	351.431	418.574	269.675	378.262	312.123	81.1609
PIS1	278.362	315.061	332.508	232.751	378.215	444.46	578.517	400.145	423.224	404.513	350.752	236.557	48.6966
ATP1	276.893	329.382	365.312	66.5004	472.769	286.089	223.942	334.034	451.129	449.458	378.262	243.128	64.9287
PMT2	276.159	141.481	138.297	199.501	94.5537	309.079	286.148	285.321	227.89	179.783	165.06	200.416	32.4644
LAT1	275.424	234.814	243.417	266.002	283.661	250.328	205.28	271.403	172.08	89.8917	206.325	151.133	113.625
PRE3	274.69	283.209	284.794	365.752	378.215	273.318	292.369	257.484	179.056	179.783	158.182	174.132	0
FKS1	273.955	163.95	172.964	232.751	378.215	508.32	435.443	657.629	323.232	314.621	185.692	190.559	1103.79
LIA1	273.221	194.567	187.875	0	0	209.458	161.736	260.964	311.605	179.783	392.017	479.684	64.9287
NCW2	272.486	185.432	176.692	66.5004	189.107	206.904	317.251	226.169	204.636	179.783	137.55	55.8536	0
PRT1	272.486	188.642	202.04	565.254	189.107	247.774	211.501	285.321	111.62	89.8917	75.6523	338.407	194.786
CBF5	271.752	306.172	263.546	698.254	94.5537	280.981	311.03	375.788	276.724	269.675	309.487	341.693	97.3931
CIT1	271.752	282.715	296.723	33.2502	283.661	255.437	236.383	354.911	248.819	134.838	178.815	39.4261	64.9287
YDR341C	271.752	241.975	252.363	432.253	283.661	283.535	211.501	299.239	237.192	224.729	226.957	292.41	48.6966
TSC13	271.017	254.814	243.044	199.501	661.876	265.654	304.81	337.513	286.025	314.621	220.08	289.125	48.6966
CIP1	270.283	52.5925	57.7789	0	94.5537	135.382	143.074	167.017	48.8336	134.838	75.6523	13.142	0
PAB1	270.283	214.321	217.323	0	378.215	572.179	547.413	591.518	565.074	404.513	770.278	351.549	259.715
RPN5	269.549	285.431	271.002	99.7506	189.107	247.774	199.059	271.403	165.104	404.513	158.182	197.13	16.2322
MIX17	268.814	234.32	203.904	99.7506	661.876	219.676	223.942	274.882	216.263	134.838	233.834	358.12	32.4644
SWP1	268.814	210.123	211.732	66.5004	94.5537	209.458	87.0885	66.1109	197.66	89.8917	137.55	118.278	32.4644
SER1	268.08	286.913	261.683	332.502	94.5537	201.795	205.28	309.677	132.548	134.838	116.917	154.419	64.9287
DUG1	267.345	274.567	257.582	133.001	94.5537	357.612	217.721	281.841	281.374	179.783	254.467	229.986	97.3931
ADE5_2C7	265.142	303.456	309.769	399.002	189.107	319.296	236.383	351.431	367.415	224.729	261.344	279.268	162.322
HRI1	265.142	244.691	218.442	565.254	283.661	275.872	292.369	354.911	132.548	179.783	89.4073	243.128	16.2322
ATP4	264.407	443.209	417.872	133.001	378.215	257.991	273.707	226.169	392.994	224.729	336.997	413.974	64.9287
CDC60	264.407	177.037	194.584	232.751	850.983	339.731	236.383	410.583	327.883	269.675	364.507	266.126	227.251
ERV46	264.407	189.876	172.591	299.252	189.107	263.1	279.927	344.472	144.175	89.8917	123.795	203.701	48.6966
ELO2	263.673	168.642	172.591	33.2502	189.107	291.198	267.486	247.046	251.144	404.513	364.507	335.122	32.4644
YMR295C	262.938	285.185	257.955	166.251	472.769	189.023	261.266	313.157	313.93	449.458	385.139	246.413	32.4644
YKT6	262.204	341.234	324.68	332.502	378.215	257.991	211.501	240.087	225.565	224.729	192.57	269.412	16.2322
RPT1	260.735	228.641	259.073	199.501	0	199.241	223.942	299.239	179.056	0	281.977	229.986	16.2322
FAS1	259.266	184.197	196.448	399.002	661.876	247.774	311.03	323.595	197.66	179.783	158.182	203.701	876.538
PRE10	259.266	319.012	324.307	232.751	378.215	224.785	261.266	264.443	179.056	269.675	151.305	160.99	32.4644
RPC10	259.266	234.567	214.714	133.001	283.661	199.241	317.251	205.292	279.049	359.567	309.487	450.114	32.4644
MAP1	258.532	209.382	203.531	0	189.107	280.981	236.383	281.841	202.311	134.838	178.815	308.838	32.4644
HCR1	257.797	202.716	209.122	133.001	0	224.785	223.942	243.566	155.802	224.729	151.305	282.554	32.4644
APT1	257.063	251.357	226.642	631.754	472.769	380.601	404.339	389.706	237.192	314.621	309.487	367.977	48.6966
GAS5	257.063	200.493	199.803	0	283.661	245.219	199.059	184.415	293.001	269.675	343.874	151.133	48.6966
RPN6	257.063	235.802	240.062	99.7506	283.661	242.665	211.501	299.239	181.382	89.8917	130.672	147.848	48.6966
SPE3	256.328	269.135	272.12	465.503	283.661	416.362	354.575	358.391	241.842	314.621	206.325	292.41	16.2322
TOM5	254.859	232.592	262.055	0	283.661	257.991	248.824	215.73	253.47	179.783	103.162	279.268	32.4644
FUR1	254.125	175.308	174.455	166.251	378.215	255.437	298.589	271.403	162.779	44.9458	137.55	312.123	0
NHP6A	254.125	379.999	378.359	33.2502	94.5537	314.187	311.03	226.169	344.16	539.35	295.732	272.697	16.2322
PIC2	254.125	390.616	375.376	33.2502	94.5537	206.904	273.707	208.771	406.946	314.621	323.242	16.4275	16.2322
PRE4	254.125	256.049	254.6	66.5004	283.661	166.034	186.618	191.374	199.985	89.8917	206.325	233.271	16.2322
RAS2	254.125	219.012	224.406	0	94.5537	212.013	273.707	274.882	209.287	89.8917	178.815	75.5667	64.9287
RPB5	254.125	219.753	205.767	166.251	283.661	196.686	292.369	267.923	148.826	134.838	158.182	252.984	16.2322
GCD11	253.39	242.716	263.546	166.251	283.661	237.556	255.045	212.251	176.731	44.9458	240.712	266.126	113.625
ARC15	252.656	375.555	386.56	66.5004	850.983	171.143	199.059	212.251	234.866	44.9458	268.222	131.42	16.2322
ATP17	252.656	492.838	448.439	365.752	189.107	273.318	261.266	208.771	353.462	314.621	288.854	292.41	16.2322
RPT6	252.656	255.802	224.033	66.5004	283.661	196.686	273.707	254.005	118.596	89.8917	116.917	167.561	48.6966
IDH1	250.452	132.592	134.569	0	94.5537	260.546	230.162	254.005	76.7385	89.8917	96.2848	65.7101	81.1609
ATP16	249.718	421.727	417.872	99.7506	472.769	214.567	205.28	201.812	444.153	494.404	488.301	223.414	32.4644
GIM4	249.718	163.456	165.509	465.503	283.661	171.143	180.398	177.455	137.199	89.8917	151.305	262.841	16.2322
NDE1	249.718	217.037	222.169	199.501	94.5537	385.71	273.707	309.677	286.025	359.567	350.752	315.409	48.6966
PUP3	249.718	291.357	301.569	199.501	94.5537	245.219	223.942	240.087	255.795	449.458	213.202	203.701	48.6966
ARP2	248.984	274.567	267.274	0	0	201.795	230.162	233.128	255.795	89.8917	185.692	174.132	48.6966
PST1	248.984	202.716	198.312	0	94.5537	166.034	205.28	208.771	255.795	314.621	247.589	101.851	32.4644
GDT1	248.249	200.74	181.165	465.503	567.322	344.84	298.589	288.8	260.446	179.783	275.099	351.549	32.4644
PFK2	248.249	178.518	191.602	66.5004	378.215	452.123	379.457	514.969	376.716	494.404	392.017	220.129	340.876
SNC2	247.515	239.259	239.316	0	94.5537	150.708	211.501	229.648	293.001	359.567	323.242	193.845	0
ARA1	246.78	310.123	269.883	0	94.5537	183.915	242.604	170.496	202.311	314.621	185.692	78.8522	32.4644
THR1	246.78	180.247	171.1	0	283.661	214.567	180.398	198.333	155.802	89.8917	130.672	193.845	32.4644
TMA10	246.78	164.938	165.136	0	283.661	194.132	242.604	153.099	158.128	224.729	206.325	0	0
DYS1	246.046	229.629	235.962	0	472.769	332.068	273.707	337.513	304.628	314.621	357.629	239.842	48.6966
ERG9	246.046	284.197	299.332	99.7506	472.769	217.121	230.162	219.21	272.073	359.567	357.629	154.419	32.4644
HMF1	246.046	338.518	313.87	33.2502	189.107	224.785	248.824	247.046	253.47	494.404	268.222	197.13	32.4644
IFA38	246.046	196.296	220.678	199.501	94.5537	301.416	199.059	247.046	197.66	44.9458	144.427	131.42	16.2322
PGA2	246.046	291.357	261.31	565.254	378.215	189.023	261.266	173.976	165.104	44.9458	144.427	183.988	16.2322
TPO3	246.046	108.148	112.576	33.2502	189.107	227.339	223.942	229.648	160.453	224.729	137.55	88.7087	64.9287
TSC3	246.046	238.271	235.589	232.751	0	247.774	180.398	173.976	218.588	134.838	199.447	213.558	16.2322
YSA1	246.046	398.271	394.388	33.2502	378.215	186.469	248.824	194.853	311.605	314.621	165.06	121.564	16.2322
HTS1	244.577	232.839	217.323	66.5004	189.107	227.339	136.853	215.73	218.588	44.9458	323.242	239.842	129.857
ILV6	244.577	233.086	219.933	0	189.107	224.785	248.824	208.771	153.477	89.8917	151.305	193.845	81.1609
GPX2	243.842	102.222	102.138	166.251	94.5537	227.339	217.721	184.415	88.3655	44.9458	82.5298	252.984	16.2322
PRY2	243.842	197.037	179.301	33.2502	189.107	250.328	149.295	118.304	211.612	44.9458	323.242	229.986	32.4644
CCT4	243.108	214.814	227.388	266.002	94.5537	257.991	199.059	215.73	137.199	179.783	116.917	262.841	16.2322
TPO2	243.108	94.0739	102.138	66.5004	0	293.753	180.398	267.923	193.009	314.621	268.222	128.135	0
YARCTyB1-1	243.108	106.173	128.232	199.501	0	293.753	167.956	306.198	155.802	0	158.182	62.4246	2272.51
COX7	242.373	193.827	200.176	33.2502	94.5537	137.936	155.515	104.386	165.104	134.838	123.795	98.5652	0
BAT2	240.17	163.21	180.419	99.7506	283.661	278.426	217.721	316.636	127.897	89.8917	123.795	59.1391	113.625
ASP3-3	239.435	205.432	195.33	33.2502	94.5537	209.458	211.501	177.455	160.453	224.729	165.06	124.849	32.4644
DBP2	239.435	268.148	265.037	631.754	283.661	265.654	167.956	347.952	255.795	44.9458	295.732	640.674	357.108
ACP1	237.967	295.555	273.238	0	283.661	214.567	167.956	208.771	339.51	404.513	288.854	193.845	32.4644
CLC1	237.967	304.691	293.368	66.5004	283.661	176.252	211.501	271.403	153.477	134.838	171.937	151.133	81.1609
DSE2	237.967	202.222	232.607	0	189.107	324.405	329.692	254.005	460.431	1483.21	907.828	459.971	48.6966
LHP1	237.967	239.753	225.524	33.2502	0	240.111	211.501	201.812	167.429	44.9458	199.447	423.83	48.6966
PMT1	237.967	112.099	117.794	133.001	378.215	222.23	174.177	393.186	130.223	404.513	151.305	174.132	113.625
SHB17	237.967	181.481	174.082	133.001	283.661	206.904	211.501	260.964	174.406	224.729	103.162	282.554	64.9287
TMC1	237.967	165.679	161.781	33.2502	94.5537	337.177	441.663	320.116	118.596	44.9458	61.8974	91.9942	32.4644
ADE1	237.232	412.592	416.008	133.001	189.107	227.339	248.824	267.923	269.747	179.783	220.08	262.841	48.6966
FES1	237.232	120.987	127.859	99.7506	189.107	196.686	230.162	274.882	113.945	44.9458	48.1424	124.849	0
SUP35	237.232	164.691	175.573	299.252	283.661	189.023	174.177	229.648	106.969	89.8917	96.2848	200.416	97.3931
GLC7	236.498	292.345	276.22	99.7506	283.661	217.121	223.942	320.116	395.319	584.296	502.056	338.407	48.6966
RTC3	236.498	204.691	198.685	0	94.5537	122.61	174.177	125.263	72.0877	44.9458	103.162	6.57101	0
VMA5	236.498	242.716	238.198	166.251	189.107	390.819	398.119	375.788	262.771	359.567	412.649	226.7	113.625
SUR2	235.763	367.16	368.294	33.2502	94.5537	280.981	255.045	194.853	290.676	179.783	206.325	252.984	48.6966
MGE1	235.029	340.493	348.537	0	283.661	206.904	242.604	194.853	211.612	179.783	206.325	174.132	48.6966
LSB1	234.294	144.197	143.515	99.7506	0	217.121	267.486	219.21	74.4131	0	96.2848	108.422	32.4644
RPT2	232.825	236.543	224.779	133.001	189.107	222.23	230.162	212.251	337.184	134.838	343.874	216.843	97.3931
SSH1	232.825	176.049	177.81	498.753	189.107	449.569	398.119	518.448	353.462	359.567	392.017	315.409	48.6966
CCT8	232.091	186.913	191.602	266.002	189.107	232.448	279.927	316.636	130.223	314.621	151.305	197.13	64.9287
CDC42	232.091	216.296	214.714	33.2502	283.661	212.013	199.059	285.321	186.033	224.729	192.57	259.555	81.1609
PUN1	232.091	99.7529	87.6003	66.5004	0	217.121	167.956	194.853	132.548	89.8917	110.04	88.7087	48.6966
RPN9	232.091	220	202.04	133.001	94.5537	163.48	223.942	191.374	144.175	134.838	130.672	177.417	32.4644
ATP19	231.356	414.32	432.41	33.2502	567.322	183.915	199.059	160.058	441.828	674.188	309.487	226.7	0
KRE2	231.356	231.111	274.357	0	472.769	406.145	223.942	320.116	225.565	134.838	199.447	216.843	129.857
SOP4	231.356	216.049	221.796	66.5004	94.5537	206.904	217.721	194.853	181.382	89.8917	158.182	151.133	16.2322
PUP1	230.622	235.555	222.542	99.7506	283.661	199.241	167.956	177.455	172.08	134.838	82.5298	180.703	48.6966
RPC40	230.622	200.246	188.247	266.002	283.661	196.686	192.839	264.443	116.27	134.838	137.55	298.981	48.6966
RPN3	230.622	223.95	220.678	166.251	94.5537	206.904	261.266	233.128	179.056	224.729	171.937	177.417	64.9287
SDH3	230.622	317.777	308.651	0	94.5537	145.599	136.853	114.824	211.612	404.513	261.344	137.991	16.2322
LSM7	229.887	238.024	225.897	33.2502	189.107	181.36	242.604	191.374	158.128	179.783	96.2848	193.845	0
HAC1	229.153	201.234	209.868	2261.01	1040.09	577.288	1013.96	810.728	220.914	359.567	185.692	197.13	535.662
NPT1	229.153	185.185	184.147	66.5004	189.107	219.676	248.824	243.566	169.755	89.8917	151.305	206.987	64.9287
SAC6	229.153	187.407	206.886	199.501	94.5537	227.339	211.501	229.648	93.0163	89.8917	68.7748	85.4232	32.4644
BTN2	228.418	127.901	120.777	0	189.107	163.48	217.721	118.304	81.3893	134.838	61.8974	32.8551	0
OST5	228.418	244.197	229.625	33.2502	0	224.785	205.28	243.566	188.358	134.838	116.917	229.986	48.6966
WBP1	228.418	208.395	199.803	0	567.322	242.665	292.369	264.443	172.08	134.838	158.182	160.99	32.4644
ERP1	226.95	228.641	199.058	432.253	189.107	375.492	367.016	334.034	246.493	314.621	220.08	331.836	32.4644
PRE8	226.95	209.382	200.921	0	189.107	204.35	267.486	226.169	195.334	314.621	151.305	180.703	16.2322
WRS1	226.95	211.604	209.495	133.001	189.107	178.806	286.148	274.882	174.406	224.729	192.57	262.841	32.4644
YMR226C	226.95	225.679	221.424	0	189.107	263.1	205.28	194.853	109.294	179.783	103.162	160.99	64.9287
ADH6	226.215	222.716	229.625	299.252	94.5537	311.633	429.222	302.718	199.985	224.729	199.447	279.268	113.625
FAA4	226.215	306.419	307.16	133.001	850.983	235.002	261.266	257.484	330.208	134.838	302.609	321.98	146.09
STT3	226.215	138.024	130.096	99.7506	378.215	314.187	267.486	400.145	237.192	134.838	254.467	151.133	211.018
VPS68	226.215	230.37	232.607	66.5004	283.661	212.013	223.942	219.21	288.351	314.621	254.467	101.851	16.2322
EGT2	225.481	96.0492	101.393	33.2502	378.215	171.143	143.074	135.701	174.406	134.838	220.08	187.274	146.09
HXT4	225.481	1454.32	1508.22	0	1512.86	242.665	230.162	187.894	1862.65	2112.45	1808.78	49.2826	32.4644
RNA1	225.481	214.321	234.098	99.7506	0	201.795	223.942	250.525	155.802	89.8917	144.427	226.7	16.2322
YPT7	225.481	255.308	249.381	232.751	283.661	194.132	211.501	194.853	283.7	224.729	220.08	190.559	0
ITR1	223.277	258.024	257.955	299.252	94.5537	255.437	199.059	299.239	262.771	134.838	226.957	203.701	32.4644
MRT4	223.277	206.913	193.466	232.751	472.769	224.785	230.162	180.935	116.27	89.8917	130.672	509.254	32.4644
CCT2	222.543	183.703	198.312	332.502	189.107	201.795	217.721	247.046	132.548	44.9458	96.2848	223.414	32.4644
KRE9	222.543	166.913	161.781	99.7506	0	150.708	199.059	149.619	146.501	89.8917	171.937	141.277	32.4644
SEC28	222.543	275.061	279.203	0	94.5537	232.448	211.501	212.251	183.707	89.8917	110.04	164.275	32.4644
VMA2	222.543	259.506	253.854	299.252	661.876	424.025	709.149	622.834	190.683	89.8917	158.182	180.703	243.483
YPT31	222.543	242.962	230.743	0	94.5537	181.36	205.28	149.619	111.62	44.9458	96.2848	190.559	16.2322
AMN1	221.808	187.16	186.384	33.2502	94.5537	204.35	223.942	281.841	225.565	449.458	158.182	266.126	64.9287
PMI40	221.808	168.148	162.526	99.7506	189.107	194.132	192.839	173.976	199.985	224.729	281.977	246.413	48.6966
PRE7	221.808	255.061	260.564	99.7506	189.107	298.861	261.266	250.525	318.581	269.675	488.301	233.271	32.4644
PRS3	221.808	155.308	156.562	299.252	0	227.339	211.501	254.005	62.786	134.838	48.1424	206.987	113.625
RNR2	221.808	295.555	313.124	33.2502	94.5537	242.665	323.472	257.484	344.16	269.675	288.854	177.417	113.625
ARP3	221.074	225.185	234.843	0	189.107	189.023	155.515	219.21	160.453	224.729	130.672	118.278	81.1609
ASP3-2	221.074	206.913	183.401	0	94.5537	227.339	180.398	215.73	148.826	224.729	137.55	137.991	64.9287
LYS12	221.074	160	156.562	99.7506	0	201.795	261.266	194.853	125.572	0	75.6523	187.274	81.1609
NHP6B	221.074	305.678	317.97	133.001	189.107	178.806	199.059	153.099	295.327	314.621	137.55	275.983	0
DSE1	220.339	146.419	164.018	133.001	189.107	237.556	242.604	254.005	60.4606	44.9458	75.6523	164.275	178.554
EMC3	220.339	215.061	190.484	199.501	283.661	252.883	167.956	271.403	132.548	0	89.4073	154.419	32.4644
PRO3	220.339	210.37	222.169	199.501	94.5537	232.448	174.177	278.362	286.025	359.567	316.364	223.414	32.4644
SEC13	220.339	210.617	225.151	66.5004	0	237.556	242.604	368.829	255.795	134.838	233.834	275.983	32.4644
SOD2	219.605	250.617	234.471	0	472.769	176.252	186.618	180.935	348.811	179.783	254.467	141.277	48.6966
YHR020W	219.605	175.802	175.946	33.2502	567.322	247.774	279.927	313.157	102.318	134.838	144.427	206.987	129.857
YIP3	219.605	156.543	164.39	0	189.107	191.578	223.942	201.812	162.779	314.621	185.692	151.133	16.2322
ASP3-1	218.87	196.79	209.122	33.2502	0	260.546	292.369	191.374	139.525	44.9458	116.917	124.849	113.625
QCR7	218.87	464.196	461.858	133.001	378.215	199.241	236.383	187.894	441.828	764.079	426.404	279.268	32.4644
TMH11	218.87	277.53	288.149	99.7506	283.661	265.654	304.81	236.607	220.914	179.783	151.305	160.99	48.6966
AAT2	218.136	184.691	193.093	166.251	189.107	380.601	199.059	320.116	237.192	89.8917	178.815	197.13	48.6966
ACS2	218.136	171.851	167.745	99.7506	283.661	212.013	155.515	198.333	130.223	134.838	158.182	183.988	162.322
GCV3	217.402	280.246	276.593	199.501	94.5537	240.111	230.162	229.648	365.089	359.567	378.262	285.839	48.6966
KRE1	217.402	123.95	111.457	33.2502	94.5537	160.925	161.736	208.771	186.033	44.9458	110.04	82.1377	16.2322
LCB2	216.667	170.864	171.1	66.5004	94.5537	196.686	211.501	250.525	155.802	44.9458	165.06	151.133	16.2322
SEC4	216.667	257.283	224.033	266.002	94.5537	163.48	174.177	254.005	234.866	179.783	165.06	91.9942	64.9287
ARC19	214.464	307.901	245.281	0	378.215	168.588	143.074	118.304	297.652	134.838	309.487	128.135	48.6966
ILV2	214.464	109.136	107.357	0	94.5537	255.437	317.251	327.075	232.541	539.35	233.834	220.129	129.857
RPN13	213.729	264.197	265.41	66.5004	189.107	189.023	217.721	170.496	144.175	44.9458	96.2848	131.42	32.4644
UBI4	213.729	301.728	298.959	0	94.5537	237.556	105.75	111.345	374.391	674.188	467.669	65.7101	48.6966
ASP3-4	212.995	210.864	181.91	0	189.107	212.013	255.045	163.537	160.453	134.838	151.305	164.275	162.322
CCS1	212.995	144.938	134.942	0	94.5537	173.697	236.383	184.415	86.0401	0	82.5298	164.275	0
FET3	212.995	98.0245	114.812	232.751	94.5537	370.384	360.795	421.022	134.874	179.783	61.8974	118.278	194.786
GBP2	212.995	187.654	183.774	66.5004	94.5537	222.23	161.736	226.169	239.517	44.9458	275.099	308.838	32.4644
MRP8	212.995	244.444	253.109	0	94.5537	214.567	335.913	226.169	81.3893	89.8917	110.04	72.2812	16.2322
RRB1	212.995	138.271	140.533	332.502	0	227.339	149.295	337.513	125.572	44.9458	137.55	404.117	48.6966
TOM7	212.995	221.728	250.127	33.2502	189.107	171.143	136.853	114.824	253.47	314.621	123.795	154.419	16.2322
GLY1	212.26	182.222	185.638	66.5004	283.661	398.482	279.927	372.309	283.7	224.729	206.325	354.835	194.786
RPN10	212.26	212.098	199.803	66.5004	189.107	199.241	155.515	139.181	88.3655	89.8917	103.162	183.988	48.6966
URA6	212.26	186.419	186.756	33.2502	0	183.915	167.956	191.374	97.6672	44.9458	75.6523	183.988	48.6966
RPS9A	211.526	288.148	257.955	133.001	283.661	178.806	248.824	128.742	174.406	44.9458	158.182	193.845	81.1609
SHM2	211.526	469.382	487.952	66.5004	378.215	191.578	192.839	243.566	427.875	224.729	378.262	210.272	81.1609
YCP4	211.526	245.185	219.187	133.001	0	235.002	192.839	198.333	190.683	134.838	165.06	167.561	16.2322
NOP7	210.791	204.197	212.477	365.752	283.661	189.023	236.383	236.607	158.128	179.783	185.692	348.264	0
PUB1	210.791	233.333	209.868	66.5004	378.215	224.785	267.486	267.923	267.422	179.783	426.404	197.13	113.625
GVP36	210.057	256.296	242.299	232.751	283.661	183.915	223.942	208.771	279.049	89.8917	323.242	229.986	81.1609
MCR1	210.057	310.617	272.866	66.5004	189.107	219.676	186.618	194.853	286.025	269.675	199.447	62.4246	0
RPN1	210.057	157.777	158.426	266.002	94.5537	166.034	167.956	264.443	218.588	359.567	254.467	105.136	113.625
SCS7	210.057	241.975	253.109	33.2502	283.661	196.686	180.398	208.771	169.755	44.9458	103.162	108.422	48.6966
CCT6	209.322	170.123	170.355	166.251	94.5537	224.785	192.839	278.362	139.525	89.8917	130.672	220.129	48.6966
RPN2	209.322	173.333	194.212	199.501	567.322	206.904	236.383	236.607	267.422	269.675	240.712	187.274	113.625
TAT1	209.322	93.58	87.6003	133.001	189.107	212.013	149.295	323.595	141.85	44.9458	110.04	282.554	129.857
ELO1	208.588	305.185	270.256	33.2502	283.661	296.307	261.266	163.537	323.232	449.458	254.467	82.1377	48.6966
TVP18	208.588	189.135	175.946	0	283.661	191.578	199.059	208.771	223.239	44.9458	185.692	128.135	16.2322
LIP1	207.853	207.407	213.968	0	189.107	181.36	161.736	177.455	69.7623	134.838	82.5298	62.4246	0
RVS167	207.853	172.592	191.602	0	94.5537	140.49	199.059	177.455	72.0877	44.9458	34.3874	91.9942	0
ATP3	207.119	344.938	313.497	133.001	567.322	178.806	149.295	198.333	390.669	449.458	481.424	210.272	48.6966
DIA1	207.119	64.4443	50.6963	0	0	120.055	105.75	167.017	44.1828	0	20.6325	19.713	32.4644
LPD1	207.119	256.296	245.281	99.7506	94.5537	155.817	130.633	250.525	232.541	269.675	151.305	177.417	64.9287
TUF1	206.385	263.95	273.611	266.002	94.5537	214.567	255.045	208.771	225.565	449.458	137.55	160.99	64.9287
UMP1	206.385	226.419	213.596	0	94.5537	163.48	167.956	132.222	130.223	224.729	110.04	111.707	0
ATP7	205.65	351.11	359.72	33.2502	756.43	232.448	230.162	184.415	230.215	269.675	110.04	239.842	16.2322
MIC10	205.65	245.678	240.435	0	0	135.382	87.0885	135.701	225.565	269.675	213.202	216.843	0
TIM8	205.65	175.061	173.709	0	283.661	148.153	155.515	160.058	283.7	179.783	178.815	154.419	16.2322
TOM22	205.65	236.296	204.649	33.2502	189.107	291.198	261.266	254.005	230.215	134.838	185.692	190.559	0
BRX1	204.916	162.222	156.562	99.7506	94.5537	219.676	124.412	194.853	183.707	44.9458	137.55	325.265	81.1609
COX8	204.916	351.604	358.975	0	378.215	178.806	180.398	170.496	211.612	269.675	137.55	206.987	0
IDI1	204.916	180	180.047	199.501	189.107	132.827	149.295	243.566	141.85	89.8917	192.57	239.842	48.6966
TCB3	204.916	110.617	114.44	0	94.5537	183.915	174.177	222.689	120.921	134.838	123.795	95.2797	178.554
ERP2	204.181	200	213.968	0	0	237.556	279.927	250.525	158.128	44.9458	116.917	177.417	64.9287
FPR3	204.181	226.913	231.861	33.2502	189.107	181.36	230.162	271.403	172.08	44.9458	192.57	223.414	64.9287
MES1	203.447	181.975	181.91	199.501	94.5537	252.883	223.942	292.28	202.311	89.8917	123.795	262.841	113.625
EMI2	201.978	609.381	653.088	0	472.769	209.458	174.177	184.415	960.394	1033.75	667.116	22.9986	0
STP4	201.978	83.4566	83.8726	0	94.5537	158.371	105.75	132.222	111.62	89.8917	123.795	134.706	0
CHO1	201.243	161.234	160.29	99.7506	94.5537	240.111	236.383	240.087	211.612	44.9458	178.815	144.562	0
RLP7	201.243	147.901	130.468	365.752	283.661	173.697	149.295	139.181	132.548	224.729	89.4073	354.835	0
SKP1	200.509	237.53	257.209	399.002	189.107	135.382	217.721	264.443	62.786	89.8917	103.162	154.419	32.4644
TUB1	200.509	145.185	157.308	99.7506	283.661	217.121	174.177	233.128	174.406	44.9458	110.04	177.417	16.2322
ATP14	199.774	276.79	274.357	0	0	127.718	180.398	118.304	248.819	539.35	226.957	164.275	16.2322
CCT5	199.774	176.543	142.024	465.503	283.661	194.132	255.045	306.198	209.287	89.8917	199.447	226.7	32.4644
KTR4	199.774	174.814	180.792	66.5004	189.107	176.252	155.515	173.976	227.89	179.783	275.099	78.8522	16.2322
NOP58	199.774	219.753	197.567	0	378.215	229.893	199.059	288.8	281.374	269.675	536.444	338.407	113.625
RIB3	199.774	223.209	229.625	266.002	0	160.925	130.633	48.7133	137.199	89.8917	178.815	59.1391	32.4644
TSL1	199.774	99.0121	125.623	0	189.107	204.35	255.045	198.333	160.453	44.9458	192.57	9.85652	32.4644
ACC1	199.04	131.358	137.178	199.501	283.661	219.676	273.707	267.923	137.199	179.783	103.162	167.561	697.984
AHC2	199.04	224.197	237.453	33.2502	0	153.262	236.383	180.935	158.128	224.729	123.795	180.703	16.2322
ILV1	199.04	192.345	179.674	33.2502	189.107	183.915	174.177	208.771	146.501	179.783	123.795	223.414	129.857
RVS161	199.04	219.259	218.069	33.2502	189.107	217.121	199.059	208.771	197.66	134.838	213.202	114.993	16.2322
CPR3	198.305	196.543	205.022	0	472.769	273.318	242.604	180.935	216.263	134.838	192.57	174.132	32.4644
GLN4	198.305	129.136	130.468	432.253	94.5537	255.437	317.251	247.046	176.731	224.729	103.162	220.129	113.625
COX13	197.571	332.839	328.035	266.002	189.107	171.143	174.177	153.099	204.636	314.621	165.06	200.416	48.6966
HMRA1	197.571	225.432	233.352	133.001	472.769	112.392	199.059	100.906	218.588	404.513	171.937	131.42	16.2322
VRG4	197.571	177.777	191.975	232.751	378.215	467.45	379.457	441.899	758.083	1393.32	811.543	338.407	81.1609
LSM2	196.837	214.321	211.732	66.5004	189.107	245.219	267.486	184.415	211.612	449.458	158.182	114.993	16.2322
LSM5	196.837	189.135	197.939	598.504	94.5537	143.045	205.28	212.251	193.009	359.567	371.384	256.27	16.2322
TIM11	196.102	326.913	294.113	166.251	283.661	181.36	192.839	180.935	193.009	179.783	192.57	141.277	0
CCT7	195.368	210.37	204.276	66.5004	378.215	153.262	174.177	274.882	190.683	134.838	137.55	229.986	16.2322
SPT15	193.899	174.074	184.147	33.2502	472.769	168.588	192.839	208.771	281.374	359.567	316.364	272.697	48.6966
TMA20	193.899	189.135	176.692	0	94.5537	178.806	192.839	118.304	158.128	134.838	123.795	213.558	0
BAR1	193.164	75.8023	85.3637	0	94.5537	160.925	180.398	149.619	109.294	134.838	89.4073	75.5667	81.1609
BDF2	193.164	125.679	140.16	66.5004	189.107	158.371	143.074	191.374	351.137	494.404	316.364	269.412	129.857
TPM2	193.164	203.95	175.573	99.7506	0	127.718	167.956	167.017	95.3417	44.9458	75.6523	174.132	16.2322
AGA2	192.43	94.8146	106.984	0	189.107	168.588	161.736	180.935	79.0639	0	55.0199	55.8536	0
HOG1	192.43	149.382	161.781	99.7506	0	194.132	211.501	198.333	118.596	179.783	110.04	121.564	64.9287
TNA1	192.43	126.913	120.777	166.251	94.5537	255.437	236.383	306.198	213.938	179.783	213.202	164.275	48.6966
YMR315W	192.43	223.703	236.707	0	189.107	155.817	192.839	184.415	116.27	89.8917	151.305	42.7116	48.6966
FYV5	191.695	212.839	196.076	0	0	132.827	87.0885	118.304	202.311	269.675	178.815	177.417	0
SRP21	191.695	213.086	167	33.2502	378.215	168.588	149.295	128.742	213.938	224.729	192.57	210.272	16.2322
GDI1	190.961	180.987	188.247	0	283.661	209.458	111.971	191.374	132.548	404.513	137.55	78.8522	129.857
HTZ1	190.961	193.58	191.23	33.2502	94.5537	168.588	192.839	149.619	199.985	89.8917	213.202	193.845	0
MDH1	190.961	398.765	383.577	99.7506	378.215	194.132	217.721	278.362	316.256	314.621	302.609	111.707	16.2322
OST2	190.961	183.209	180.792	365.752	283.661	173.697	186.618	167.017	120.921	179.783	151.305	183.988	16.2322
COX12	190.226	309.135	313.87	166.251	94.5537	137.936	155.515	135.701	206.961	224.729	233.834	141.277	16.2322
PHS1	190.226	145.432	135.314	0	94.5537	199.241	136.853	180.935	104.643	44.9458	137.55	154.419	0
DSK2	189.492	93.0862	88.7186	0	0	155.817	199.059	187.894	134.874	89.8917	82.5298	98.5652	48.6966
SDD2	188.757	272.839	230.37	332.502	94.5537	194.132	180.398	170.496	232.541	314.621	213.202	187.274	16.2322
TIM17	188.757	192.345	180.047	0	189.107	186.469	180.398	215.73	193.009	134.838	226.957	262.841	0
ADE16	187.288	157.777	139.415	365.752	283.661	181.36	136.853	226.169	151.152	179.783	96.2848	134.706	64.9287
ADE3	187.288	157.037	172.218	66.5004	283.661	206.904	192.839	271.403	144.175	89.8917	116.917	124.849	292.179
GLO1	187.288	212.592	214.714	166.251	283.661	252.883	255.045	247.046	134.874	89.8917	123.795	85.4232	0
NCP1	187.288	148.148	149.48	0	94.5537	183.915	161.736	215.73	120.921	269.675	123.795	154.419	113.625
NIP7	187.288	199.012	211.359	465.503	189.107	191.578	192.839	163.537	186.033	44.9458	151.305	341.693	0
RPN7	187.288	182.716	172.591	99.7506	378.215	127.718	174.177	205.292	165.104	269.675	165.06	121.564	48.6966
SHP1	187.288	141.975	159.544	99.7506	189.107	125.164	118.192	149.619	97.6672	89.8917	103.162	88.7087	16.2322
SRP1	186.554	141.728	144.634	266.002	94.5537	176.252	230.162	156.578	99.9926	0	96.2848	108.422	48.6966
EGO4	185.82	1529.63	1591.34	0	661.876	107.284	161.736	107.865	1299.9	1348.38	1017.87	13.142	0
SEC63	185.82	150.123	151.343	266.002	0	171.143	167.956	281.841	130.223	44.9458	144.427	141.277	0
ALA1	185.085	136.296	141.279	232.751	472.769	257.991	211.501	247.046	188.358	44.9458	185.692	216.843	162.322
SSP120	185.085	200.493	167.745	133.001	189.107	217.121	248.824	274.882	272.073	134.838	226.957	193.845	16.2322
SVF1	185.085	181.975	186.756	133.001	189.107	186.469	93.3091	215.73	176.731	0	178.815	282.554	32.4644
BAP3	184.351	173.58	173.337	33.2502	661.876	194.132	223.942	198.333	188.358	179.783	103.162	124.849	97.3931
ESF1	184.351	128.889	140.906	66.5004	0	140.49	105.75	153.099	104.643	0	103.162	190.559	81.1609
LSM1	184.351	169.629	157.308	0	94.5537	150.708	136.853	177.455	116.27	44.9458	82.5298	144.562	16.2322
RVB1	184.351	155.802	153.207	33.2502	378.215	201.795	161.736	212.251	141.85	89.8917	192.57	229.986	64.9287
SFM1	184.351	192.839	197.567	232.751	472.769	217.121	136.853	194.853	151.152	134.838	55.0199	226.7	48.6966
SRP14	184.351	177.284	174.828	33.2502	94.5537	117.501	155.515	257.484	304.628	404.513	364.507	374.548	32.4644
EMC4	183.616	191.605	208.75	0	94.5537	137.936	149.295	215.73	213.938	89.8917	178.815	141.277	16.2322
HYR1	183.616	255.555	235.216	33.2502	378.215	127.718	230.162	194.853	153.477	179.783	240.712	141.277	0
VMA21	183.616	203.209	205.395	66.5004	94.5537	171.143	211.501	233.128	220.914	179.783	323.242	203.701	48.6966
TRP5	182.882	160	160.663	232.751	283.661	214.567	174.177	167.017	120.921	179.783	137.55	108.422	129.857
AIM29	182.147	195.061	175.573	299.252	94.5537	181.36	205.28	191.374	151.152	89.8917	137.55	183.988	0
FOL2	182.147	249.629	257.582	365.752	283.661	171.143	124.412	121.783	181.382	269.675	199.447	190.559	48.6966
FUN12	182.147	127.901	127.859	166.251	661.876	209.458	167.956	306.198	148.826	314.621	178.815	223.414	129.857
GDA1	182.147	110.123	115.931	99.7506	94.5537	229.893	161.736	184.415	116.27	44.9458	116.917	160.99	64.9287
RPG1	182.147	157.037	178.555	33.2502	283.661	150.708	186.618	236.607	253.47	269.675	199.447	275.983	129.857
TMA22	182.147	199.506	193.466	0	189.107	148.153	143.074	114.824	95.3417	89.8917	55.0199	141.277	32.4644
WWM1	182.147	186.172	157.68	199.501	94.5537	145.599	155.515	212.251	102.318	179.783	89.4073	216.843	32.4644
YMR099C	182.147	184.197	185.638	199.501	189.107	201.795	217.721	156.578	176.731	224.729	130.672	167.561	32.4644
ZPR1	182.147	98.0245	108.848	66.5004	94.5537	173.697	273.707	194.853	67.4368	44.9458	110.04	154.419	48.6966
TYE7	181.413	134.568	139.042	33.2502	0	107.284	93.3091	135.701	155.802	179.783	206.325	200.416	16.2322
SEC62	180.678	152.098	164.39	33.2502	378.215	125.164	167.956	118.304	74.4131	89.8917	96.2848	147.848	32.4644
ATG27	179.944	136.296	145.006	33.2502	189.107	84.2942	143.074	191.374	144.175	134.838	137.55	144.562	16.2322
RER1	179.944	163.703	150.598	66.5004	0	232.448	267.486	173.976	202.311	269.675	158.182	154.419	16.2322
TCP1	179.944	137.531	107.357	66.5004	283.661	212.013	192.839	201.812	146.501	314.621	130.672	220.129	64.9287
HAP4	179.209	116.79	110.339	0	189.107	186.469	167.956	219.21	146.501	134.838	165.06	101.851	146.09
RPN11	179.209	197.037	190.857	99.7506	472.769	137.936	118.192	104.386	181.382	179.783	233.834	108.422	16.2322
VMA16	179.209	266.913	317.598	365.752	567.322	679.462	640.723	462.776	369.74	314.621	336.997	400.832	64.9287
VTC3	179.209	358.518	355.247	465.503	378.215	153.262	174.177	229.648	318.581	269.675	460.791	344.978	129.857
AHA1	178.475	75.0616	77.9083	0	0	168.588	205.28	128.742	39.5319	44.9458	41.2649	78.8522	32.4644
PRO2	178.475	168.889	140.533	66.5004	94.5537	217.121	124.412	187.894	88.3655	179.783	82.5298	151.133	64.9287
PBI2	177.74	228.888	221.424	0	0	145.599	68.4267	13.9181	174.406	179.783	254.467	59.1391	32.4644
HRP1	177.006	180	163.272	66.5004	94.5537	199.241	199.059	236.607	239.517	359.567	247.589	226.7	16.2322
MNN9	177.006	122.222	137.551	166.251	94.5537	206.904	161.736	247.046	74.4131	0	68.7748	157.704	48.6966
ORM2	177.006	129.876	111.085	0	0	201.795	155.515	69.5904	99.9926	44.9458	137.55	88.7087	0
UBA1	177.006	101.481	119.285	166.251	189.107	232.448	192.839	226.169	95.3417	89.8917	144.427	91.9942	97.3931
AYR1	176.272	269.876	251.991	33.2502	189.107	189.023	255.045	167.017	104.643	89.8917	130.672	42.7116	16.2322
PHO86	176.272	229.629	231.861	66.5004	0	173.697	118.192	184.415	253.47	0	220.08	256.27	64.9287
GPD2	175.537	124.444	132.705	0	189.107	163.48	167.956	247.046	351.137	224.729	426.404	124.849	16.2322
RPN12	175.537	224.444	218.814	0	0	206.904	180.398	194.853	134.874	44.9458	123.795	170.846	0
ATP5	174.803	301.728	295.232	232.751	189.107	176.252	236.383	139.181	227.89	224.729	185.692	243.128	0
CCT3	174.803	165.926	185.638	33.2502	94.5537	196.686	192.839	309.677	369.74	134.838	405.772	367.977	48.6966
EMC1	174.068	117.531	120.777	0	94.5537	140.49	111.971	135.701	123.247	179.783	96.2848	180.703	113.625
FTR1	174.068	89.6294	90.5824	299.252	94.5537	173.697	136.853	170.496	106.969	269.675	151.305	197.13	32.4644
OST4	173.334	103.703	97.665	0	94.5537	163.48	186.618	97.4265	130.223	224.729	96.2848	121.564	0
SLT2	173.334	132.098	138.297	66.5004	0	163.48	105.75	156.578	99.9926	89.8917	103.162	65.7101	32.4644
URM1	173.334	133.086	135.314	99.7506	189.107	176.252	211.501	170.496	151.152	89.8917	206.325	203.701	16.2322
FPR4	172.599	210.617	230.743	0	94.5537	173.697	167.956	215.73	239.517	224.729	213.202	364.691	0
KTR1	172.599	159.753	163.272	133.001	94.5537	342.286	267.486	309.677	258.12	224.729	412.649	174.132	64.9287
PHO13	172.599	167.901	160.29	99.7506	94.5537	191.578	199.059	167.017	193.009	359.567	165.06	177.417	32.4644
RPT3	172.599	178.765	193.839	33.2502	94.5537	140.49	130.633	156.578	118.596	89.8917	116.917	160.99	0
SEC61	172.599	115.802	112.948	0	378.215	242.665	217.721	295.759	255.795	0	96.2848	157.704	97.3931
NAP1	171.865	177.777	175.201	66.5004	0	150.708	180.398	173.976	99.9926	134.838	110.04	128.135	64.9287
PGM2	171.865	584.937	572.943	0	472.769	120.055	143.074	167.017	299.978	179.783	240.712	6.57101	0
UBC7	171.865	157.037	167	0	0	114.947	167.956	100.906	111.62	89.8917	110.04	98.5652	0
ROT1	171.13	153.827	165.509	99.7506	0	112.392	105.75	125.263	109.294	134.838	82.5298	91.9942	64.9287
COQ5	170.396	203.209	201.667	66.5004	0	212.013	217.721	247.046	330.208	224.729	385.139	160.99	16.2322
IGO1	170.396	141.234	163.272	0	0	137.936	217.721	114.824	118.596	179.783	110.04	95.2797	16.2322
MNP1	170.396	214.074	214.714	133.001	283.661	176.252	143.074	139.181	125.572	134.838	123.795	108.422	0
URA4	170.396	195.555	195.703	0	189.107	209.458	167.956	160.058	137.199	134.838	48.1424	279.268	0
YOS1	170.396	196.296	195.703	166.251	189.107	212.013	211.501	149.619	118.596	44.9458	116.917	134.706	0
ARO8	169.661	191.111	204.649	232.751	0	245.219	223.942	247.046	297.652	224.729	385.139	216.843	97.3931
DPM1	169.661	170.123	164.018	33.2502	189.107	186.469	223.942	149.619	148.826	44.9458	123.795	134.706	32.4644
ERG13	169.661	154.814	161.781	0	189.107	306.524	192.839	163.537	176.731	224.729	158.182	157.704	97.3931
SRV2	169.661	170.864	183.401	33.2502	94.5537	181.36	155.515	153.099	193.009	44.9458	96.2848	101.851	97.3931
COM2	168.927	60.9875	59.6427	66.5004	94.5537	168.588	192.839	156.578	46.5082	0	55.0199	88.7087	81.1609
FSH1	168.927	194.567	202.413	532.003	189.107	127.718	211.501	114.824	137.199	44.9458	96.2848	289.125	32.4644
PTC3	168.927	197.53	176.319	199.501	189.107	173.697	167.956	194.853	155.802	179.783	123.795	121.564	32.4644
GET1	168.192	132.839	137.551	99.7506	189.107	120.055	161.736	135.701	153.477	89.8917	171.937	95.2797	16.2322
MNN10	168.192	137.284	142.397	133.001	0	191.578	105.75	170.496	95.3417	134.838	130.672	167.561	16.2322
NOP15	168.192	154.568	157.68	33.2502	0	125.164	180.398	167.017	123.247	89.8917	151.305	285.839	16.2322
SIM1	168.192	135.802	131.587	0	378.215	309.079	223.942	292.28	320.906	314.621	336.997	197.13	81.1609
ZWF1	168.192	146.419	162.154	0	0	189.023	174.177	177.455	213.938	134.838	220.08	65.7101	81.1609
RPT4	167.458	201.234	179.301	99.7506	189.107	183.915	143.074	184.415	162.779	179.783	165.06	193.845	48.6966
ERV29	166.723	134.074	110.712	33.2502	94.5537	237.556	230.162	222.689	125.572	44.9458	89.4073	82.1377	32.4644
MDH3	166.723	188.888	179.674	266.002	189.107	148.153	155.515	160.058	132.548	224.729	116.917	137.991	32.4644
OAC1	166.723	78.5183	82.3815	99.7506	0	148.153	149.295	177.455	95.3417	134.838	96.2848	180.703	48.6966
ASP1	165.989	110.123	129.35	698.254	189.107	278.426	199.059	167.017	93.0163	89.8917	123.795	269.412	113.625
KTR3	165.989	146.419	139.415	33.2502	283.661	204.35	149.295	233.128	74.4131	134.838	96.2848	154.419	48.6966
QCR9	165.989	344.691	370.903	66.5004	283.661	206.904	186.618	149.619	269.747	584.296	281.977	147.848	16.2322
TIM23	165.989	131.358	118.54	33.2502	0	79.1855	130.633	156.578	74.4131	44.9458	48.1424	124.849	32.4644
DLD3	165.255	198.765	201.294	99.7506	189.107	166.034	205.28	205.292	188.358	269.675	116.917	52.5681	113.625
SUR7	165.255	132.839	126.368	0	94.5537	171.143	217.721	149.619	165.104	89.8917	116.917	118.278	16.2322
TIF4631	165.255	106.173	128.977	133.001	189.107	214.567	223.942	271.403	81.3893	179.783	96.2848	137.991	227.251
VPS74	164.52	190.123	185.265	133.001	283.661	158.371	174.177	163.537	169.755	359.567	199.447	144.562	16.2322
CRS1	163.786	120.494	115.558	33.2502	94.5537	173.697	136.853	226.169	193.009	134.838	144.427	164.275	48.6966
POL30	163.786	125.432	132.332	0	94.5537	125.164	111.971	149.619	155.802	179.783	123.795	229.986	0
TUB3	163.786	128.395	133.451	166.251	94.5537	168.588	43.5443	38.2747	113.945	179.783	247.589	95.2797	16.2322
ERO1	163.051	108.395	113.694	232.751	189.107	148.153	111.971	160.058	79.0639	0	48.1424	88.7087	48.6966
LOG1	163.051	190.864	175.201	66.5004	94.5537	143.045	93.3091	149.619	218.588	89.8917	178.815	141.277	0
SCP160	163.051	119.259	127.859	0	189.107	186.469	155.515	156.578	134.874	89.8917	220.08	141.277	243.483
APD1	162.317	155.308	156.189	199.501	189.107	145.599	136.853	170.496	120.921	44.9458	55.0199	72.2812	32.4644
DPH5	162.317	154.321	130.468	33.2502	0	201.795	180.398	198.333	99.9926	89.8917	48.1424	183.988	16.2322
TOM70	162.317	158.024	169.982	33.2502	94.5537	209.458	124.412	184.415	134.874	224.729	96.2848	128.135	16.2322
KES1	161.582	179.753	165.509	66.5004	94.5537	178.806	93.3091	146.14	151.152	224.729	171.937	114.993	32.4644
RUB1	161.582	176.296	185.265	199.501	283.661	143.045	261.266	177.455	139.525	89.8917	96.2848	137.991	0
YDC1	161.582	179.506	155.817	33.2502	283.661	206.904	279.927	163.537	153.477	89.8917	158.182	16.4275	0
ALD5	160.848	164.197	163.272	66.5004	189.107	163.48	99.5297	111.345	132.548	89.8917	240.712	141.277	113.625
ARC18	160.848	242.716	247.145	33.2502	0	148.153	180.398	128.742	158.128	179.783	137.55	95.2797	16.2322
ARC35	160.848	188.395	192.721	66.5004	0	186.469	130.633	142.66	248.819	179.783	82.5298	157.704	32.4644
CHO2	160.848	118.518	143.888	199.501	0	288.644	186.618	254.005	132.548	134.838	130.672	164.275	146.09
EXP1	160.848	155.061	125.25	199.501	189.107	137.936	161.736	184.415	99.9926	89.8917	68.7748	167.561	16.2322
GET4	160.113	152.839	139.415	99.7506	0	120.055	174.177	212.251	109.294	179.783	55.0199	121.564	16.2322
LTP1	160.113	152.592	149.852	99.7506	189.107	166.034	143.074	163.537	93.0163	179.783	123.795	128.135	16.2322
SPC3	160.113	191.605	191.602	0	0	178.806	136.853	146.14	169.755	224.729	226.957	108.422	0
ADE17	159.379	400.987	388.796	66.5004	378.215	181.36	130.633	205.292	462.756	269.675	336.997	154.419	32.4644
BFR1	159.379	191.358	201.294	33.2502	189.107	160.925	199.059	177.455	137.199	0	116.917	101.851	48.6966
BOL2	159.379	160	144.261	66.5004	189.107	173.697	211.501	187.894	206.961	314.621	309.487	223.414	16.2322
UIP3	159.379	140.74	134.569	0	94.5537	140.49	155.515	187.894	97.6672	44.9458	110.04	62.4246	0
RCF2	158.644	160.74	156.562	33.2502	94.5537	176.252	174.177	146.14	116.27	179.783	103.162	177.417	32.4644
VPS1	158.644	148.642	147.989	0	189.107	143.045	118.192	153.099	141.85	134.838	137.55	144.562	48.6966
EMC5	157.91	157.777	147.243	199.501	0	148.153	211.501	128.742	93.0163	359.567	103.162	174.132	16.2322
GSF2	157.91	214.567	208.004	133.001	378.215	227.339	329.692	299.239	330.208	404.513	447.036	206.987	48.6966
IST2	157.91	121.234	118.913	0	94.5537	186.469	124.412	198.333	193.009	134.838	165.06	128.135	64.9287
MIS1	157.91	95.3084	93.5645	399.002	189.107	122.61	192.839	243.566	90.6909	89.8917	41.2649	200.416	64.9287
HAS1	157.175	99.9998	103.256	33.2502	94.5537	120.055	111.971	177.455	111.62	179.783	89.4073	187.274	48.6966
NAT5	157.175	121.975	109.221	133.001	94.5537	189.023	118.192	118.304	58.1352	89.8917	61.8974	183.988	16.2322
RPA34	157.175	125.926	114.812	133.001	189.107	155.817	155.515	153.099	132.548	134.838	137.55	308.838	16.2322
ARL1	156.441	184.197	167.745	299.252	378.215	155.817	130.633	153.099	167.429	179.783	213.202	183.988	0
MRPS12	156.441	176.049	168.118	133.001	0	160.925	93.3091	41.7542	153.477	44.9458	220.08	118.278	48.6966
SEC21	156.441	148.889	144.261	166.251	283.661	104.729	143.074	194.853	113.945	89.8917	137.55	151.133	113.625
SRP40	156.441	75.3085	67.8436	33.2502	0	158.371	161.736	177.455	151.152	179.783	185.692	361.406	16.2322
MNN2	155.706	111.111	107.357	33.2502	283.661	148.153	167.956	163.537	109.294	179.783	96.2848	111.707	48.6966
ECM14	154.972	125.926	136.806	0	283.661	148.153	149.295	118.304	134.874	134.838	165.06	75.5667	32.4644
LSM4	154.972	134.568	139.415	33.2502	0	112.392	105.75	86.988	79.0639	0	68.7748	105.136	16.2322
MCA1	154.972	152.592	156.935	66.5004	189.107	143.045	230.162	201.812	169.755	179.783	226.957	108.422	16.2322
COX5B	154.238	277.036	263.919	33.2502	283.661	127.718	136.853	104.386	232.541	404.513	213.202	26.2841	32.4644
GSY1	154.238	234.32	235.216	0	283.661	107.284	118.192	114.824	211.612	269.675	199.447	3.28551	16.2322
ADE8	153.503	180.493	165.136	133.001	0	91.9573	174.177	149.619	55.8098	44.9458	68.7748	111.707	0
BUR6	153.503	142.963	134.569	0	0	91.9573	74.6473	97.4265	146.501	224.729	199.447	124.849	16.2322
SND2	153.503	162.469	162.526	66.5004	283.661	222.23	248.824	201.812	313.93	224.729	350.752	361.406	32.4644
GRE3	152.769	93.3331	95.8012	99.7506	0	155.817	186.618	104.386	86.0401	134.838	41.2649	22.9986	0
DEF1	152.034	78.7653	78.6539	33.2502	189.107	127.718	105.75	128.742	193.009	134.838	281.977	105.136	64.9287
NPC2	152.034	204.691	220.678	0	189.107	240.111	205.28	156.578	337.184	404.513	392.017	190.559	16.2322
YJU3	152.034	123.95	121.895	66.5004	189.107	140.49	217.721	128.742	90.6909	0	75.6523	105.136	48.6966
AIM17	151.3	95.3084	105.12	0	189.107	168.588	180.398	187.894	102.318	44.9458	158.182	0	64.9287
CSG2	151.3	136.296	114.067	0	189.107	212.013	205.28	205.292	160.453	449.458	330.119	75.5667	32.4644
DOT6	151.3	132.345	123.013	33.2502	283.661	94.5117	87.0885	66.1109	186.033	224.729	185.692	114.993	32.4644
MAE1	151.3	58.2715	66.3525	99.7506	0	109.838	143.074	153.099	62.786	89.8917	110.04	180.703	129.857
OM14	151.3	209.135	215.087	0	94.5537	89.4029	99.5297	114.824	269.747	629.242	185.692	49.2826	16.2322
UBP6	151.3	116.543	118.167	133.001	189.107	132.827	124.412	107.865	227.89	44.9458	199.447	108.422	32.4644
FAA1	150.565	145.432	131.96	232.751	189.107	186.469	205.28	264.443	144.175	269.675	123.795	72.2812	16.2322
PSG1	150.565	85.9257	76.0445	199.501	94.5537	252.883	242.604	299.239	116.27	314.621	82.5298	131.42	16.2322
STE24	150.565	118.765	132.705	33.2502	94.5537	163.48	180.398	187.894	109.294	44.9458	116.917	134.706	16.2322
YHR138C	150.565	163.21	152.835	33.2502	189.107	94.5117	130.633	93.947	209.287	134.838	185.692	36.1406	0
ATO3	149.831	30.6172	35.7856	0	0	222.23	174.177	226.169	39.5319	44.9458	34.3874	82.1377	0
COX6	149.831	319.505	304.551	166.251	189.107	155.817	136.853	135.701	313.93	224.729	467.669	157.704	16.2322
ERD2	149.831	108.148	96.9195	299.252	189.107	237.556	211.501	219.21	116.27	269.675	137.55	121.564	0
HEK2	149.831	121.481	134.569	66.5004	0	143.045	124.412	121.783	102.318	89.8917	130.672	128.135	113.625
PHB1	149.831	171.605	169.236	66.5004	189.107	153.262	261.266	205.292	423.224	314.621	426.404	164.275	32.4644
SCW11	149.096	88.6418	102.884	33.2502	283.661	91.9573	68.4267	132.222	155.802	89.8917	165.06	203.701	64.9287
LYP1	148.362	120.987	110.339	232.751	472.769	130.273	149.295	156.578	123.247	179.783	68.7748	95.2797	16.2322
RCK2	148.362	158.271	156.935	199.501	189.107	122.61	111.971	153.099	106.969	134.838	110.04	59.1391	48.6966
RLP24	148.362	161.234	158.426	0	283.661	97.0661	167.956	100.906	76.7385	0	68.7748	203.701	32.4644
RPT5	148.362	166.666	147.989	266.002	0	168.588	155.515	146.14	174.406	224.729	116.917	118.278	32.4644
TED1	148.362	122.222	142.397	33.2502	189.107	168.588	186.618	180.935	120.921	89.8917	123.795	118.278	0
CAP2	147.627	160.74	184.147	0	94.5537	137.936	118.192	139.181	79.0639	44.9458	89.4073	52.5681	32.4644
FPR2	147.627	171.358	156.189	133.001	189.107	155.817	255.045	149.619	127.897	89.8917	110.04	118.278	16.2322
GNP1	147.627	96.0492	98.7833	33.2502	94.5537	158.371	155.515	160.058	144.175	89.8917	96.2848	128.135	64.9287
GSY2	147.627	217.283	218.069	33.2502	94.5537	178.806	199.059	208.771	165.104	89.8917	144.427	13.142	146.09
NMD3	147.627	107.407	108.102	232.751	0	166.034	143.074	149.619	104.643	89.8917	89.4073	252.984	129.857
RBD2	147.627	159.753	154.326	99.7506	189.107	171.143	155.515	132.222	179.056	134.838	213.202	121.564	32.4644
SOL3	147.627	133.086	136.06	66.5004	0	173.697	180.398	167.017	120.921	134.838	68.7748	151.133	16.2322
VPS55	147.627	176.296	150.598	0	94.5537	120.055	143.074	90.4675	176.731	89.8917	96.2848	65.7101	32.4644
ARC40	146.893	201.234	208.377	0	0	168.588	167.956	139.181	144.175	179.783	165.06	121.564	16.2322
HOC1	146.893	95.0615	97.2922	133.001	94.5537	178.806	192.839	170.496	99.9926	89.8917	96.2848	118.278	32.4644
LSC1	146.893	204.197	208.75	33.2502	94.5537	143.045	105.75	100.906	120.921	179.783	151.305	95.2797	16.2322
LSM12	146.893	136.296	131.214	133.001	0	117.501	118.192	132.222	144.175	134.838	171.937	151.133	0
MSC7	146.893	88.8887	92.0735	33.2502	0	130.273	136.853	111.345	151.152	179.783	158.182	65.7101	0
NCB2	146.893	134.568	140.16	33.2502	283.661	117.501	124.412	111.345	102.318	89.8917	89.4073	141.277	16.2322
STE6	146.893	57.0369	64.8615	66.5004	189.107	178.806	111.971	229.648	118.596	44.9458	82.5298	91.9942	113.625
UBC1	146.893	150.864	134.196	99.7506	378.215	130.273	111.971	177.455	125.572	224.729	137.55	134.706	16.2322
MRI1	146.158	111.605	102.884	232.751	94.5537	194.132	174.177	135.701	120.921	0	96.2848	200.416	16.2322
YBL028C	146.158	107.407	118.54	133.001	94.5537	143.045	192.839	149.619	102.318	224.729	89.4073	318.694	0
YPQ1	146.158	104.197	104.002	99.7506	189.107	181.36	205.28	184.415	162.779	179.783	233.834	239.842	32.4644
ASH1	145.424	83.9504	94.6828	0	94.5537	97.0661	143.074	118.304	127.897	0	96.2848	42.7116	97.3931
DPL1	145.424	104.938	112.203	33.2502	189.107	140.49	143.074	167.017	58.1352	44.9458	34.3874	62.4246	32.4644
GRX3	145.424	131.852	120.404	66.5004	0	178.806	143.074	160.058	81.3893	134.838	89.4073	124.849	48.6966
LAG1	145.424	127.16	104.375	133.001	189.107	204.35	174.177	215.73	134.874	179.783	110.04	75.5667	16.2322
PHB2	145.424	185.926	168.118	0	189.107	132.827	205.28	177.455	160.453	89.8917	151.305	108.422	64.9287
TOM40	145.424	137.531	140.16	0	472.769	183.915	155.515	163.537	269.747	179.783	385.139	91.9942	48.6966
LCB1	144.69	108.395	113.321	0	0	155.817	167.956	177.455	197.66	134.838	165.06	108.422	48.6966
NSG1	144.69	104.197	105.493	332.502	0	240.111	223.942	194.853	167.429	179.783	82.5298	141.277	16.2322
PAN5	144.69	120	118.167	33.2502	0	130.273	136.853	114.824	123.247	89.8917	48.1424	111.707	16.2322
SEC66	144.69	173.333	146.87	0	189.107	163.48	161.736	170.496	148.826	89.8917	158.182	124.849	16.2322
YAR1	144.69	92.5924	94.3101	33.2502	283.661	127.718	130.633	149.619	62.786	89.8917	75.6523	167.561	16.2322
COX17	143.955	156.049	166.254	0	378.215	84.2942	124.412	55.6723	120.921	179.783	137.55	62.4246	0
RCN2	143.955	74.8146	73.0624	0	0	86.8486	167.956	107.865	34.8811	44.9458	75.6523	19.713	32.4644
VTC2	143.955	204.938	195.703	299.252	189.107	158.371	118.192	170.496	241.842	89.8917	130.672	180.703	81.1609
YHM2	143.955	115.061	105.12	432.253	94.5537	171.143	167.956	187.894	211.612	179.783	295.732	210.272	64.9287
CRP1	143.221	80.7406	86.8547	0	0	122.61	124.412	146.14	141.85	314.621	240.712	137.991	64.9287
KRR1	143.221	141.481	126.741	99.7506	94.5537	150.708	111.971	149.619	118.596	0	103.162	246.413	0
MUP1	143.221	267.16	286.285	66.5004	189.107	132.827	211.501	167.017	309.279	314.621	275.099	128.135	48.6966
TAF9	143.221	111.358	113.321	0	0	102.175	136.853	118.304	65.1114	89.8917	41.2649	82.1377	0
THO1	143.221	154.814	178.555	0	189.107	130.273	118.192	80.0289	130.223	89.8917	151.305	85.4232	0
VTC4	143.221	247.654	255.718	199.501	756.43	194.132	230.162	233.128	265.097	314.621	275.099	203.701	129.857
GLR1	142.486	159.259	169.609	266.002	94.5537	222.23	186.618	170.496	144.175	44.9458	185.692	141.277	32.4644
SEC17	142.486	162.963	165.136	99.7506	0	158.371	149.295	80.0289	81.3893	269.675	123.795	68.9957	0
SEC23	142.486	112.592	125.25	0	189.107	209.458	118.192	187.894	218.588	179.783	213.202	128.135	64.9287
SSO2	142.486	124.444	123.386	33.2502	283.661	117.501	199.059	156.578	181.382	134.838	220.08	114.993	16.2322
STP3	142.486	105.679	99.5288	0	94.5537	74.0767	105.75	80.0289	113.945	44.9458	96.2848	91.9942	32.4644
DUT1	141.752	126.666	143.143	166.251	94.5537	132.827	199.059	212.251	109.294	134.838	89.4073	243.128	0
ETT1	141.752	117.284	121.149	99.7506	94.5537	145.599	99.5297	163.537	162.779	89.8917	165.06	160.99	16.2322
PHO12	141.752	370.863	379.104	33.2502	283.661	150.708	149.295	229.648	518.566	674.188	543.321	65.7101	97.3931
SAC1	141.752	121.481	115.558	199.501	189.107	158.371	155.515	205.292	86.0401	89.8917	82.5298	68.9957	48.6966
SEC11	141.752	150.617	162.899	33.2502	189.107	160.925	192.839	156.578	127.897	0	116.917	170.846	0
STE4	141.752	130.864	128.232	99.7506	0	94.5117	167.956	153.099	106.969	44.9458	61.8974	118.278	32.4644
TIF6	141.752	147.654	139.788	33.2502	94.5537	214.567	242.604	194.853	199.985	269.675	199.447	292.41	16.2322
ICY1	141.017	276.049	264.665	66.5004	94.5537	86.8486	124.412	104.386	144.175	269.675	165.06	52.5681	0
RPB4	141.017	159.506	143.515	0	189.107	153.262	111.971	142.66	111.62	44.9458	103.162	144.562	0
SEC27	141.017	129.136	147.243	232.751	0	176.252	186.618	198.333	127.897	44.9458	110.04	95.2797	162.322
CNB1	140.283	153.333	120.031	166.251	0	153.262	161.736	132.222	104.643	44.9458	103.162	134.706	32.4644
DCW1	140.283	125.679	113.694	99.7506	94.5537	132.827	111.971	139.181	109.294	89.8917	89.4073	105.136	0
ISD11	140.283	162.222	148.734	99.7506	283.661	137.936	180.398	93.947	90.6909	134.838	96.2848	114.993	64.9287
PDR16	140.283	115.555	99.9016	66.5004	0	107.284	93.3091	118.304	148.826	89.8917	137.55	174.132	16.2322
RPA190	140.283	58.7653	59.27	399.002	94.5537	176.252	118.192	146.14	88.3655	89.8917	116.917	193.845	486.966
MAP2	139.548	177.53	159.917	99.7506	189.107	140.49	105.75	173.976	169.755	89.8917	185.692	114.993	0
RPC11	139.548	90.6171	85.7364	33.2502	94.5537	137.936	105.75	100.906	83.7147	44.9458	130.672	128.135	16.2322
DBP5	138.814	120.74	135.314	266.002	378.215	137.936	217.721	163.537	155.802	89.8917	137.55	200.416	48.6966
ERG27	138.814	139.506	143.143	99.7506	189.107	143.045	174.177	135.701	62.786	89.8917	96.2848	101.851	16.2322
GCS1	138.814	108.642	101.393	66.5004	0	158.371	155.515	153.099	76.7385	44.9458	75.6523	137.991	0
HEM2	138.814	131.605	137.178	0	0	104.729	111.971	139.181	90.6909	44.9458	61.8974	78.8522	32.4644
MDM35	138.814	207.654	216.95	33.2502	0	107.284	149.295	149.619	269.747	404.513	281.977	98.5652	16.2322
NIT3	138.814	159.259	167.372	0	94.5537	143.045	155.515	142.66	60.4606	134.838	89.4073	154.419	16.2322
GGA2	138.079	120	115.931	33.2502	94.5537	89.4029	93.3091	114.824	97.6672	179.783	96.2848	98.5652	48.6966
NUG1	138.079	109.876	114.812	99.7506	94.5537	178.806	118.192	170.496	139.525	179.783	192.57	453.4	32.4644
PDX3	138.079	194.321	176.319	33.2502	0	125.164	161.736	93.947	123.247	179.783	151.305	118.278	16.2322
PPN2	138.079	215.555	215.087	133.001	94.5537	143.045	167.956	139.181	193.009	179.783	185.692	105.136	0
RPC19	138.079	121.481	124.877	33.2502	94.5537	135.382	217.721	135.701	137.199	134.838	178.815	285.839	16.2322
THG1	138.079	131.605	131.96	33.2502	189.107	127.718	93.3091	27.8362	53.4844	44.9458	82.5298	95.2797	16.2322
CCP1	137.345	134.321	120.777	99.7506	0	122.61	111.971	146.14	139.525	179.783	151.305	91.9942	16.2322
COX14	137.345	105.432	118.54	0	94.5537	86.8486	87.0885	27.8362	162.779	179.783	130.672	59.1391	0
GAS3	137.345	88.6418	78.2811	33.2502	94.5537	196.686	124.412	177.455	116.27	179.783	185.692	128.135	32.4644
GFA1	137.345	131.852	147.616	99.7506	94.5537	120.055	118.192	125.263	137.199	44.9458	75.6523	88.7087	97.3931
KSH1	137.345	151.605	134.196	99.7506	94.5537	153.262	180.398	170.496	169.755	89.8917	220.08	157.704	0
PRY1	137.345	201.975	195.703	0	0	163.48	174.177	139.181	283.7	494.404	268.222	91.9942	0
RPE1	137.345	106.42	112.576	66.5004	283.661	212.013	161.736	226.169	155.802	134.838	137.55	190.559	64.9287
TRM112	137.345	93.0862	93.9373	0	94.5537	84.2942	87.0885	80.0289	51.159	89.8917	48.1424	170.846	16.2322
ATP20	136.61	246.913	274.357	99.7506	94.5537	120.055	143.074	107.865	155.802	314.621	137.55	144.562	16.2322
CDC3	136.61	121.481	115.931	0	283.661	99.6204	118.192	100.906	167.429	44.9458	116.917	98.5652	16.2322
CIC1	136.61	128.395	131.96	0	378.215	143.045	124.412	121.783	144.175	179.783	144.427	282.554	16.2322
ISU1	136.61	124.197	115.931	0	378.215	114.947	105.75	121.783	102.318	179.783	61.8974	170.846	81.1609
TIM50	136.61	113.827	120.031	33.2502	0	117.501	143.074	128.742	79.0639	44.9458	75.6523	72.2812	32.4644
CIT2	135.876	60.9875	47.3414	33.2502	0	107.284	62.2061	90.4675	51.159	44.9458	61.8974	22.9986	113.625
CLU1	135.876	100.987	110.712	166.251	283.661	199.241	149.295	226.169	111.62	0	96.2848	111.707	243.483
COP1	135.876	107.901	111.085	232.751	94.5537	163.48	180.398	257.484	195.334	0	116.917	137.991	324.644
COR1	135.876	291.851	272.493	66.5004	472.769	163.48	136.853	184.415	251.144	134.838	206.325	183.988	16.2322
DIC1	135.876	88.148	86.482	199.501	0	148.153	118.192	132.222	113.945	134.838	82.5298	98.5652	48.6966
ERG1	135.876	115.061	119.658	99.7506	94.5537	176.252	167.956	260.964	274.398	764.079	302.609	203.701	64.9287
HIS4	135.876	240.493	239.689	166.251	189.107	150.708	74.6473	215.73	248.819	224.729	206.325	114.993	178.554
HSP78	135.876	92.5924	89.8369	33.2502	189.107	120.055	111.971	118.304	62.786	0	75.6523	13.142	48.6966
RDI1	135.876	142.716	140.16	33.2502	0	191.578	174.177	240.087	283.7	314.621	336.997	210.272	0
CGR1	135.141	129.136	106.984	66.5004	189.107	99.6204	124.412	114.824	130.223	89.8917	137.55	206.987	0
ERV41	135.141	99.259	89.4641	99.7506	0	135.382	143.074	156.578	97.6672	0	48.1424	101.851	16.2322
GIM3	135.141	167.654	162.154	99.7506	94.5537	150.708	161.736	111.345	106.969	89.8917	165.06	154.419	0
MID2	135.141	74.0739	75.6717	0	283.661	109.838	49.7649	100.906	106.969	134.838	96.2848	85.4232	0
RPA135	135.141	59.0122	61.8793	365.752	94.5537	171.143	136.853	212.251	95.3417	179.783	82.5298	190.559	324.644
TPO4	135.141	79.9998	87.6003	0	0	132.827	155.515	177.455	153.477	89.8917	254.467	13.142	16.2322
COX9	134.407	211.851	238.944	166.251	94.5537	189.023	211.501	146.14	237.192	89.8917	110.04	183.988	0
GPI16	134.407	89.8763	95.8012	33.2502	189.107	145.599	55.9855	146.14	79.0639	89.8917	103.162	78.8522	48.6966
LYS20	134.407	84.4443	91.3279	0	189.107	122.61	130.633	66.1109	74.4131	179.783	103.162	114.993	48.6966
SEC72	134.407	139.753	141.279	0	94.5537	104.729	87.0885	104.386	123.247	179.783	158.182	121.564	16.2322
YPF1	134.407	90.6171	114.44	0	189.107	120.055	118.192	139.181	90.6909	44.9458	75.6523	65.7101	16.2322
AIM41	133.673	206.666	209.495	0	189.107	71.5224	130.633	86.988	102.318	89.8917	137.55	42.7116	16.2322
LYS21	133.673	113.58	118.913	0	189.107	102.175	105.75	97.4265	120.921	44.9458	55.0199	82.1377	32.4644
NAT1	133.673	97.2837	95.8012	33.2502	94.5537	130.273	124.412	170.496	48.8336	44.9458	41.2649	108.422	129.857
RNR1	133.673	81.4813	93.1918	66.5004	94.5537	171.143	130.633	156.578	74.4131	179.783	89.4073	183.988	178.554
YPR1	133.673	139.259	151.716	0	0	137.936	87.0885	173.976	79.0639	89.8917	61.8974	91.9942	32.4644
CKB2	132.938	135.308	134.569	66.5004	0	135.382	111.971	135.701	72.0877	224.729	89.4073	85.4232	32.4644
CRN1	132.938	126.173	146.125	133.001	189.107	143.045	149.295	139.181	62.786	89.8917	68.7748	98.5652	48.6966
HEM12	132.938	94.3208	86.482	33.2502	94.5537	140.49	124.412	146.14	88.3655	44.9458	82.5298	118.278	16.2322
NOP2	132.938	104.691	107.73	199.501	94.5537	120.055	68.4267	104.386	104.643	89.8917	144.427	213.558	32.4644
RPB7	132.938	137.284	136.806	33.2502	94.5537	109.838	118.192	90.4675	113.945	44.9458	110.04	141.277	16.2322
SRP54	132.938	123.21	120.031	166.251	0	163.48	167.956	330.554	160.453	89.8917	103.162	105.136	32.4644
AAH1	132.204	71.8517	81.2632	266.002	0	194.132	111.971	191.374	79.0639	134.838	75.6523	361.406	64.9287
BCP1	132.204	98.2714	86.1092	332.502	0	104.729	118.192	128.742	51.159	44.9458	27.5099	193.845	48.6966
CDC10	132.204	148.148	143.888	66.5004	0	117.501	130.633	121.783	120.921	89.8917	89.4073	98.5652	16.2322
PER33	132.204	93.3331	101.393	0	0	135.382	80.8679	121.783	97.6672	44.9458	178.815	105.136	0
RFA3	132.204	131.111	132.705	33.2502	94.5537	132.827	186.618	128.742	90.6909	134.838	110.04	151.133	0
SLC1	132.204	105.926	105.493	0	0	196.686	105.75	104.386	95.3417	89.8917	61.8974	82.1377	16.2322
SUS1	132.204	118.765	126.741	133.001	0	74.0767	99.5297	86.988	88.3655	224.729	55.0199	52.5681	16.2322
TIM13	132.204	140.247	140.906	0	94.5537	107.284	105.75	146.14	83.7147	134.838	151.305	108.422	16.2322
CPR4	131.469	110.617	118.913	0	283.661	122.61	136.853	121.783	183.707	89.8917	199.447	52.5681	0
PIN3	131.469	82.7159	75.299	0	0	140.49	130.633	90.4675	127.897	89.8917	110.04	49.2826	32.4644
PSE1	131.469	70.864	78.2811	232.751	283.661	186.469	80.8679	93.947	99.9926	44.9458	82.5298	190.559	194.786
RPB11	131.469	180.247	184.52	0	189.107	127.718	118.192	114.824	113.945	89.8917	89.4073	121.564	0
MIA40	130.735	174.321	157.68	33.2502	0	109.838	205.28	111.345	139.525	44.9458	68.7748	114.993	32.4644
YBR016W	130.735	91.6047	84.2454	0	0	130.273	118.192	97.4265	65.1114	134.838	82.5298	55.8536	16.2322
AIP1	130	120	110.712	0	94.5537	112.392	105.75	132.222	169.755	134.838	55.0199	88.7087	0
AKR1	130	72.0986	76.4173	99.7506	0	140.49	149.295	170.496	79.0639	0	61.8974	42.7116	81.1609
CBC2	130	181.728	178.183	33.2502	378.215	153.262	124.412	139.181	172.08	134.838	103.162	256.27	32.4644
LEU4	130	165.926	173.337	0	189.107	196.686	174.177	212.251	290.676	404.513	233.834	91.9942	97.3931
QCR6	130	287.16	273.984	33.2502	283.661	79.1855	80.8679	100.906	320.906	134.838	364.507	160.99	32.4644
UBC9	130	90.1233	99.9016	66.5004	0	91.9573	105.75	86.988	67.4368	0	82.5298	101.851	32.4644
YBL029C-A	130	84.1973	69.7075	33.2502	0	74.0767	124.412	86.988	55.8098	0	68.7748	39.4261	0
CAJ1	129.266	151.111	145.752	33.2502	283.661	132.827	74.6473	173.976	90.6909	44.9458	48.1424	124.849	32.4644
CHS5	129.266	139.012	149.48	0	189.107	125.164	174.177	135.701	116.27	134.838	75.6523	52.5681	81.1609
DAD4	129.266	68.3949	78.6539	133.001	189.107	79.1855	124.412	48.7133	79.0639	134.838	123.795	85.4232	0
DBP3	129.266	102.716	106.239	66.5004	0	135.382	99.5297	139.181	93.0163	44.9458	165.06	289.125	48.6966
LSB3	129.266	88.8887	97.2922	99.7506	94.5537	102.175	111.971	104.386	118.596	89.8917	103.162	29.5696	16.2322
PAM17	129.266	126.913	117.422	0	0	99.6204	186.618	93.947	88.3655	44.9458	82.5298	108.422	0
PRM5	129.266	71.8517	71.9441	0	0	145.599	99.5297	93.947	51.159	44.9458	68.7748	59.1391	32.4644
SEC26	129.266	99.0121	117.422	199.501	189.107	140.49	111.971	163.537	102.318	134.838	75.6523	72.2812	146.09
XRN1	129.266	79.2591	83.1271	66.5004	378.215	178.806	118.192	233.128	93.0163	44.9458	123.795	91.9942	470.733
ERG26	128.531	120.494	103.256	99.7506	94.5537	109.838	99.5297	128.742	95.3417	0	48.1424	52.5681	0
FUM1	128.531	120.987	133.078	0	472.769	148.153	143.074	142.66	148.826	44.9458	116.917	95.2797	0
PFD1	128.531	97.5306	96.5467	33.2502	94.5537	99.6204	155.515	121.783	74.4131	0	55.0199	72.2812	0
STE18	128.531	122.716	128.977	33.2502	0	91.9573	99.5297	114.824	134.874	269.675	144.427	65.7101	0
YOR343C-B	128.531	64.6912	75.6717	133.001	0	160.925	174.177	184.415	88.3655	89.8917	123.795	108.422	1022.63
ISU2	127.797	74.0739	88.7186	0	94.5537	74.0767	124.412	90.4675	53.4844	0	61.8974	114.993	0
RIB5	127.797	216.296	200.921	166.251	94.5537	140.49	124.412	142.66	144.175	44.9458	75.6523	108.422	32.4644
TIM9	127.797	86.6665	93.5645	66.5004	94.5537	120.055	167.956	104.386	62.786	0	48.1424	36.1406	16.2322
ADE6	127.062	136.543	141.652	199.501	189.107	191.578	174.177	219.21	246.493	224.729	213.202	174.132	308.412
CHS1	127.062	80.7406	75.6717	0	0	150.708	130.633	229.648	127.897	134.838	144.427	52.5681	113.625
EMP47	127.062	106.913	95.0556	133.001	94.5537	148.153	130.633	153.099	86.0401	89.8917	116.917	78.8522	16.2322
MTC1	127.062	114.568	114.067	33.2502	94.5537	135.382	80.8679	125.263	81.3893	0	96.2848	105.136	48.6966
NYV1	127.062	129.136	128.605	99.7506	189.107	132.827	155.515	156.578	241.842	179.783	199.447	144.562	16.2322
YPD1	127.062	113.827	98.7833	0	94.5537	99.6204	99.5297	76.5494	86.0401	44.9458	116.917	111.707	0
NIF3	126.328	125.432	109.966	166.251	94.5537	114.947	161.736	118.304	60.4606	44.9458	61.8974	101.851	16.2322
PTM1	126.328	138.271	150.598	33.2502	0	153.262	143.074	170.496	104.643	0	82.5298	105.136	32.4644
APQ12	125.593	132.592	117.794	33.2502	189.107	122.61	136.853	97.4265	137.199	179.783	151.305	105.136	32.4644
COS6	125.593	115.555	102.138	66.5004	94.5537	196.686	205.28	184.415	158.128	44.9458	103.162	91.9942	48.6966
COX4	125.593	311.357	313.87	99.7506	472.769	150.708	118.192	153.099	448.804	359.567	508.934	151.133	0
SAM2	125.593	230.123	250.5	0	283.661	125.164	136.853	180.935	216.263	134.838	233.834	144.562	16.2322
SMI1	125.593	109.876	124.131	66.5004	94.5537	81.7398	130.633	149.619	69.7623	44.9458	110.04	137.991	0
TAF14	125.593	144.938	137.178	33.2502	472.769	143.045	130.633	139.181	123.247	89.8917	82.5298	157.704	0
CUE1	124.859	120.74	118.167	299.252	0	120.055	93.3091	100.906	141.85	89.8917	123.795	114.993	48.6966
PDX1	124.859	108.642	99.1561	0	94.5537	81.7398	118.192	86.988	65.1114	89.8917	89.4073	91.9942	0
RPA49	124.859	98.0245	94.6828	99.7506	94.5537	107.284	105.75	198.333	134.874	0	103.162	220.129	81.1609
TPA1	124.859	70.1233	63.7432	166.251	0	109.838	80.8679	128.742	86.0401	44.9458	61.8974	187.274	64.9287
YDL012C	124.859	109.629	100.647	0	0	84.2942	149.295	80.0289	76.7385	44.9458	82.5298	68.9957	0
DRE2	124.125	91.8516	96.1739	33.2502	0	145.599	124.412	107.865	62.786	179.783	75.6523	111.707	16.2322
HIP1	124.125	74.3208	68.5892	66.5004	94.5537	176.252	130.633	156.578	86.0401	0	75.6523	147.848	32.4644
NEW1	124.125	99.259	109.221	99.7506	94.5537	212.013	192.839	205.292	116.27	134.838	103.162	187.274	227.251
PBP1	124.125	85.9257	78.2811	266.002	0	112.392	124.412	160.058	67.4368	0	68.7748	62.4246	64.9287
RSM19	124.125	91.3578	90.9552	0	94.5537	112.392	87.0885	104.386	81.3893	44.9458	68.7748	52.5681	16.2322
SEC65	124.125	116.79	115.931	66.5004	94.5537	102.175	80.8679	83.5085	111.62	134.838	110.04	118.278	0
TOM20	124.125	112.592	117.049	33.2502	0	143.045	80.8679	86.988	99.9926	179.783	171.937	124.849	16.2322
GLO3	123.39	104.691	98.7833	99.7506	189.107	186.469	161.736	191.374	141.85	134.838	220.08	177.417	16.2322
LAP2	123.39	118.765	129.35	33.2502	94.5537	135.382	136.853	125.263	86.0401	44.9458	41.2649	88.7087	48.6966
RAD23	123.39	103.457	97.2922	33.2502	94.5537	150.708	124.412	153.099	132.548	269.675	171.937	190.559	48.6966
YNL190W	123.39	109.629	103.629	0	945.537	510.874	472.766	549.764	890.631	853.971	1251.7	170.846	113.625
HHO1	122.656	113.333	118.167	0	94.5537	107.284	55.9855	100.906	144.175	89.8917	144.427	167.561	16.2322
KAP123	122.656	52.3456	62.6249	33.2502	94.5537	158.371	192.839	160.058	125.572	89.8917	110.04	144.562	211.018
MGR2	122.656	86.4196	80.8905	99.7506	189.107	91.9573	87.0885	90.4675	60.4606	179.783	27.5099	91.9942	0
YCK1	122.656	97.5306	89.8369	0	189.107	102.175	80.8679	83.5085	113.945	0	68.7748	144.562	16.2322
ANP1	121.921	82.7159	83.1271	66.5004	94.5537	86.8486	68.4267	104.386	46.5082	0	68.7748	108.422	64.9287
HRR25	121.921	126.419	139.042	33.2502	94.5537	74.0767	74.6473	107.865	83.7147	44.9458	137.55	160.99	48.6966
PCM1	121.921	107.16	108.848	266.002	0	122.61	155.515	142.66	74.4131	134.838	48.1424	75.5667	48.6966
SNQ2	121.921	34.3209	42.1227	66.5004	94.5537	160.925	161.736	201.812	58.1352	44.9458	61.8974	144.562	243.483
MXR1	121.187	250.617	259.819	33.2502	94.5537	102.175	105.75	132.222	216.263	269.675	103.162	101.851	0
SPF1	121.187	86.9134	86.8547	0	0	217.121	155.515	219.21	88.3655	179.783	75.6523	114.993	162.322
TFS1	121.187	171.605	177.064	66.5004	189.107	81.7398	105.75	59.1518	134.874	134.838	171.937	9.85652	32.4644
YARCTyA1-1	121.187	52.3456	53.6785	33.2502	189.107	71.5224	62.2061	80.0289	34.8811	0	61.8974	19.713	909.002
MKT1	120.452	114.074	115.558	33.2502	283.661	125.164	62.2061	170.496	111.62	44.9458	61.8974	65.7101	146.09
QCR2	120.452	199.259	203.158	33.2502	472.769	102.175	93.3091	114.824	227.89	179.783	165.06	88.7087	32.4644
SVP26	120.452	85.4319	101.765	0	94.5537	171.143	105.75	97.4265	62.786	44.9458	13.755	52.5681	16.2322
DFG5	119.718	107.407	109.221	199.501	94.5537	107.284	93.3091	93.947	125.572	44.9458	68.7748	82.1377	32.4644
LSM3	118.983	105.679	104.748	133.001	0	81.7398	99.5297	118.304	162.779	89.8917	185.692	151.133	0
MKC7	118.983	39.0123	37.6495	0	0	125.164	49.7649	111.345	60.4606	44.9458	55.0199	108.422	64.9287
PPN1	118.983	99.7529	107.357	0	189.107	166.034	93.3091	208.771	118.596	134.838	103.162	85.4232	81.1609
RLI1	118.983	85.9257	80.1449	0	94.5537	143.045	99.5297	139.181	148.826	359.567	171.937	180.703	32.4644
RPA12	118.983	93.827	98.0378	0	0	89.4029	49.7649	80.0289	83.7147	44.9458	82.5298	213.558	16.2322
RPB2	118.983	88.6418	98.7833	99.7506	283.661	150.708	111.971	184.415	109.294	44.9458	82.5298	114.993	162.322
SNF4	118.983	124.938	114.812	66.5004	0	137.936	167.956	104.386	72.0877	0	110.04	101.851	32.4644
TPD3	118.983	140.494	155.817	33.2502	94.5537	153.262	124.412	198.333	109.294	89.8917	103.162	82.1377	16.2322
YBR056W	118.983	128.642	133.078	33.2502	0	155.817	87.0885	111.345	134.874	224.729	55.0199	19.713	32.4644
CAP1	118.249	192.098	186.011	33.2502	94.5537	150.708	211.501	160.058	104.643	89.8917	89.4073	65.7101	16.2322
CUZ1	118.249	116.543	111.085	99.7506	94.5537	94.5117	93.3091	160.058	111.62	0	103.162	108.422	0
ERG28	118.249	294.567	276.966	0	283.661	61.3049	124.412	55.6723	225.565	89.8917	226.957	68.9957	0
GCD1	118.249	98.2714	102.884	0	0	120.055	99.5297	83.5085	83.7147	89.8917	75.6523	111.707	113.625
HAM1	118.249	102.222	90.9552	0	94.5537	91.9573	111.971	83.5085	65.1114	44.9458	48.1424	91.9942	0
ILM1	118.249	111.852	117.794	33.2502	189.107	150.708	180.398	125.263	116.27	134.838	68.7748	49.2826	0
MCM1	118.249	70.864	74.5534	0	0	76.6311	74.6473	114.824	113.945	224.729	171.937	128.135	0
MDY2	118.249	93.3331	90.9552	0	472.769	117.501	136.853	121.783	46.5082	0	61.8974	59.1391	0
PHO8	118.249	182.222	185.265	66.5004	0	160.925	155.515	160.058	172.08	179.783	226.957	68.9957	48.6966
BEM2	117.514	50.3703	38.0222	133.001	94.5537	114.947	124.412	125.263	53.4844	44.9458	55.0199	59.1391	243.483
CDC37	117.514	112.099	115.931	99.7506	94.5537	122.61	130.633	254.005	267.422	89.8917	220.08	177.417	32.4644
GPP2	117.514	218.024	212.104	0	94.5537	176.252	155.515	83.5085	141.85	134.838	96.2848	52.5681	48.6966
MNN5	117.514	72.0986	58.8972	232.751	0	166.034	105.75	173.976	81.3893	89.8917	116.917	91.9942	16.2322
YKE2	117.514	137.777	131.214	0	0	74.0767	62.2061	48.7133	81.3893	134.838	61.8974	95.2797	0
MRP2	116.78	127.407	130.841	33.2502	94.5537	140.49	167.956	107.865	102.318	89.8917	55.0199	108.422	16.2322
POM33	116.78	120.987	101.02	0	94.5537	125.164	87.0885	97.4265	199.985	179.783	254.467	65.7101	0
PPH21	116.78	138.765	131.214	0	378.215	160.925	111.971	111.345	86.0401	134.838	75.6523	128.135	32.4644
RCR1	116.78	59.2591	58.5244	0	0	97.0661	99.5297	83.5085	83.7147	134.838	82.5298	19.713	0
RIE1	116.78	83.2097	84.6181	133.001	189.107	125.164	130.633	184.415	125.572	44.9458	110.04	91.9942	64.9287
SCD6	116.78	121.234	113.321	0	0	99.6204	87.0885	90.4675	109.294	134.838	137.55	111.707	16.2322
SFB3	116.78	73.3332	81.2632	99.7506	94.5537	135.382	99.5297	121.783	74.4131	134.838	89.4073	75.5667	64.9287
SSO1	116.78	133.58	139.788	0	0	107.284	143.074	59.1518	81.3893	44.9458	82.5298	111.707	0
YIP4	116.78	123.95	130.468	133.001	283.661	84.2942	136.853	62.6314	53.4844	44.9458	68.7748	72.2812	48.6966
YPS7	116.78	59.506	60.3883	33.2502	94.5537	94.5117	55.9855	76.5494	41.8574	89.8917	48.1424	55.8536	32.4644
HIS3	116.045	157.037	161.408	66.5004	189.107	91.9573	105.75	90.4675	132.548	134.838	116.917	111.707	0
MPC1	116.045	138.271	134.569	33.2502	0	81.7398	62.2061	107.865	141.85	179.783	89.4073	68.9957	0
TRM82	116.045	85.6788	80.5177	0	0	99.6204	143.074	118.304	76.7385	44.9458	75.6523	197.13	16.2322
UBC6	116.045	108.395	122.268	33.2502	94.5537	112.392	111.971	139.181	153.477	179.783	116.917	124.849	32.4644
CPR2	115.311	126.173	112.576	33.2502	0	102.175	87.0885	76.5494	76.7385	44.9458	55.0199	88.7087	16.2322
EMG1	115.311	107.16	116.676	99.7506	189.107	114.947	143.074	118.304	44.1828	89.8917	68.7748	177.417	32.4644
FIT3	115.311	23.4567	27.212	0	94.5537	127.718	93.3091	90.4675	46.5082	0	55.0199	36.1406	48.6966
GAD1	115.311	95.5553	84.9909	0	0	94.5117	99.5297	97.4265	120.921	179.783	103.162	3.28551	0
MSC1	115.311	186.913	196.076	0	378.215	91.9573	149.295	97.4265	139.525	89.8917	123.795	6.57101	0
CPA1	114.576	66.9134	78.6539	33.2502	189.107	79.1855	124.412	128.742	44.1828	0	61.8974	154.419	48.6966
JIP5	114.576	79.506	87.973	0	94.5537	81.7398	111.971	104.386	41.8574	44.9458	41.2649	98.5652	0
MRX14	114.576	125.679	124.504	99.7506	0	58.7505	118.192	93.947	76.7385	179.783	48.1424	55.8536	0
RET2	114.576	80.7406	83.8726	66.5004	0	94.5117	143.074	135.701	90.6909	224.729	116.917	88.7087	97.3931
SEC22	114.576	116.049	114.44	0	94.5537	125.164	74.6473	118.304	99.9926	179.783	41.2649	78.8522	0
SHE10	114.576	88.6418	96.5467	0	378.215	104.729	99.5297	142.66	62.786	44.9458	68.7748	65.7101	48.6966
SRP68	114.576	109.876	115.558	299.252	0	117.501	124.412	97.4265	102.318	89.8917	89.4073	157.704	16.2322
YBT1	114.576	59.2591	67.8436	133.001	0	125.164	80.8679	114.824	30.2303	44.9458	61.8974	42.7116	211.018
ACL4	113.842	67.9011	63.7432	199.501	0	122.61	111.971	93.947	55.8098	44.9458	41.2649	128.135	16.2322
ALE1	113.842	126.666	121.149	0	472.769	132.827	136.853	90.4675	125.572	0	151.305	88.7087	32.4644
BCY1	113.842	124.444	127.486	0	0	125.164	93.3091	100.906	125.572	134.838	89.4073	49.2826	0
ELF1	113.842	220.246	190.484	0	94.5537	81.7398	111.971	93.947	127.897	89.8917	199.447	141.277	16.2322
END3	113.842	155.802	168.118	33.2502	94.5537	140.49	136.853	118.304	102.318	89.8917	123.795	75.5667	16.2322
HAL5	113.842	55.8023	67.8436	0	0	112.392	68.4267	114.824	88.3655	0	55.0199	26.2841	16.2322
LDB7	113.842	101.728	106.984	232.751	0	79.1855	87.0885	93.947	53.4844	89.8917	61.8974	75.5667	16.2322
NSP1	113.842	66.1727	65.607	0	94.5537	76.6311	74.6473	104.386	44.1828	0	48.1424	65.7101	32.4644
RPB3	113.842	99.259	99.5288	99.7506	0	79.1855	136.853	73.0699	53.4844	134.838	61.8974	118.278	48.6966
SFT1	113.842	78.0245	87.6003	66.5004	94.5537	74.0767	68.4267	62.6314	58.1352	89.8917	61.8974	82.1377	32.4644
SWS2	113.842	120	105.866	0	189.107	89.4029	105.75	80.0289	88.3655	44.9458	89.4073	72.2812	0
TCB2	113.842	57.7776	72.3168	99.7506	94.5537	122.61	124.412	177.455	48.8336	89.8917	82.5298	78.8522	32.4644
UBC13	113.842	113.333	122.268	0	0	120.055	130.633	93.947	113.945	134.838	48.1424	111.707	16.2322
YPR148C	113.842	113.333	116.303	0	0	120.055	186.618	114.824	58.1352	89.8917	61.8974	52.5681	0
ARD1	113.108	103.95	107.73	33.2502	94.5537	94.5117	136.853	100.906	44.1828	0	41.2649	111.707	48.6966
ARO3	113.108	241.481	303.805	33.2502	94.5537	120.055	118.192	125.263	209.287	224.729	302.609	88.7087	32.4644
EMP70	113.108	78.5183	93.1918	299.252	0	219.676	205.28	250.525	169.755	134.838	226.957	124.849	81.1609
GCD7	113.108	58.5184	69.7075	66.5004	283.661	107.284	136.853	146.14	46.5082	134.838	27.5099	65.7101	16.2322
MYO2	113.108	63.2097	55.9151	66.5004	0	140.49	62.2061	205.292	116.27	134.838	96.2848	174.132	113.625
SCS3	113.108	67.1603	62.9976	66.5004	0	127.718	37.3236	41.7542	32.5557	0	68.7748	36.1406	16.2322
ABP1	112.373	89.6294	98.4105	33.2502	94.5537	109.838	99.5297	125.263	93.0163	0	68.7748	55.8536	64.9287
CSE1	112.373	82.7159	86.8547	33.2502	283.661	132.827	118.192	132.222	46.5082	44.9458	34.3874	78.8522	16.2322
DAD1	112.373	115.555	124.877	133.001	0	109.838	74.6473	62.6314	62.786	269.675	68.7748	85.4232	0
ESS1	112.373	117.037	110.712	33.2502	0	84.2942	124.412	107.865	76.7385	44.9458	110.04	82.1377	32.4644
GCN20	112.373	119.259	123.386	365.752	283.661	130.273	217.721	139.181	79.0639	89.8917	96.2848	114.993	146.09
NTH1	112.373	132.345	137.924	0	94.5537	135.382	143.074	173.976	120.921	44.9458	89.4073	19.713	97.3931
PTH2	112.373	102.963	92.4462	33.2502	0	91.9573	136.853	114.824	72.0877	44.9458	75.6523	95.2797	0
EMC6	111.639	122.222	117.794	133.001	283.661	240.111	230.162	146.14	160.453	404.513	185.692	121.564	0
KTR6	111.639	73.3332	73.0624	99.7506	94.5537	107.284	118.192	149.619	81.3893	0	96.2848	101.851	16.2322
TVP23	111.639	111.111	102.511	0	0	104.729	118.192	69.5904	104.643	44.9458	75.6523	65.7101	0
YGR054W	111.639	58.2715	58.5244	0	283.661	102.175	118.192	100.906	97.6672	134.838	82.5298	128.135	16.2322
CKA2	110.904	127.16	133.451	0	94.5537	79.1855	124.412	107.865	97.6672	89.8917	96.2848	128.135	16.2322
DTD1	110.904	88.8887	98.7833	99.7506	94.5537	112.392	130.633	128.742	86.0401	44.9458	55.0199	108.422	0
GRH1	110.904	97.7776	108.475	33.2502	0	120.055	161.736	90.4675	90.6909	44.9458	48.1424	59.1391	48.6966
IPT1	110.904	68.6418	64.4887	66.5004	189.107	109.838	155.515	111.345	93.0163	44.9458	89.4073	134.706	16.2322
MDH2	110.904	204.938	198.312	0	283.661	48.533	105.75	48.7133	137.199	44.9458	144.427	213.558	32.4644
RAD6	110.904	118.024	106.984	66.5004	94.5537	63.8592	62.2061	62.6314	74.4131	134.838	55.0199	98.5652	16.2322
TYW1	110.904	63.9505	74.9262	133.001	0	107.284	62.2061	149.619	60.4606	89.8917	34.3874	111.707	16.2322
CWH41	110.17	73.0863	79.0266	0	94.5537	140.49	99.5297	173.976	53.4844	0	75.6523	55.8536	32.4644
ERG24	110.17	85.4319	82.0088	33.2502	94.5537	143.045	161.736	107.865	102.318	134.838	68.7748	68.9957	32.4644
FCF1	110.17	118.271	118.913	0	189.107	125.164	118.192	69.5904	60.4606	0	55.0199	137.991	16.2322
LSO2	110.17	135.061	134.942	33.2502	94.5537	86.8486	93.3091	93.947	86.0401	0	96.2848	108.422	0
SQT1	110.17	81.7282	67.4708	166.251	0	63.8592	68.4267	128.742	139.525	179.783	185.692	272.697	32.4644
ALD4	109.435	180.74	184.892	66.5004	189.107	148.153	161.736	149.619	148.826	134.838	116.917	29.5696	0
HAP1	109.435	56.79	64.8615	99.7506	94.5537	84.2942	99.5297	125.263	41.8574	89.8917	68.7748	88.7087	146.09
PRX1	109.435	146.419	149.48	0	0	86.8486	155.515	73.0699	162.779	179.783	116.917	36.1406	0
RBG1	109.435	64.4443	58.5244	133.001	0	117.501	87.0885	205.292	216.263	179.783	165.06	433.687	48.6966
RBL2	109.435	115.802	106.984	0	94.5537	102.175	105.75	104.386	81.3893	89.8917	82.5298	78.8522	0
RDL2	109.435	135.802	124.877	0	0	97.0661	93.3091	107.865	109.294	134.838	123.795	82.1377	0
RHO5	109.435	83.7035	80.8905	0	0	43.4243	87.0885	93.947	88.3655	44.9458	110.04	55.8536	0
TIM21	109.435	79.9998	81.636	0	0	102.175	87.0885	118.304	44.1828	89.8917	41.2649	85.4232	16.2322
TRP2	109.435	122.716	126.368	66.5004	94.5537	204.35	199.059	170.496	74.4131	0	82.5298	105.136	16.2322
ALO1	108.701	87.1603	97.2922	0	0	97.0661	149.295	135.701	79.0639	89.8917	123.795	121.564	32.4644
AVT1	108.701	74.8146	82.3815	299.252	283.661	120.055	118.192	107.865	76.7385	359.567	41.2649	121.564	32.4644
CIR1	108.701	103.457	110.712	0	94.5537	74.0767	105.75	73.0699	81.3893	89.8917	48.1424	39.4261	0
GET2	108.701	82.7159	94.6828	0	94.5537	114.947	105.75	76.5494	81.3893	44.9458	75.6523	62.4246	0
SHM1	108.701	98.0245	105.12	166.251	283.661	178.806	242.604	198.333	60.4606	44.9458	75.6523	72.2812	64.9287
SRP72	108.701	99.0121	99.5288	99.7506	94.5537	107.284	118.192	146.14	51.159	44.9458	110.04	137.991	16.2322
YIF1	108.701	78.0245	68.9619	99.7506	94.5537	99.6204	105.75	104.386	111.62	44.9458	75.6523	82.1377	0
ATX1	107.966	140.494	139.788	199.501	0	120.055	155.515	90.4675	125.572	224.729	96.2848	95.2797	16.2322
GRX5	107.966	122.222	113.694	0	0	109.838	136.853	86.988	132.548	134.838	116.917	147.848	0
LAC1	107.966	122.716	118.913	33.2502	94.5537	232.448	174.177	219.21	130.223	179.783	116.917	114.993	32.4644
LEU9	107.966	82.7159	88.7186	66.5004	94.5537	209.458	124.412	170.496	116.27	314.621	123.795	128.135	48.6966
MIT1	107.966	42.469	41.7499	0	94.5537	99.6204	62.2061	80.0289	44.1828	89.8917	41.2649	49.2826	16.2322
ROQ1	107.966	30.1234	38.395	0	94.5537	68.968	93.3091	62.6314	34.8811	89.8917	48.1424	0	0
SEC24	107.966	80.2467	99.9016	33.2502	0	158.371	118.192	222.689	216.263	134.838	261.344	108.422	97.3931
SER2	107.966	91.8516	80.5177	33.2502	94.5537	114.947	87.0885	97.4265	113.945	89.8917	68.7748	124.849	16.2322
SRP102	107.966	90.6171	82.3815	199.501	0	81.7398	87.0885	62.6314	69.7623	0	27.5099	91.9942	0
YIP1	107.966	85.9257	81.2632	33.2502	0	122.61	74.6473	90.4675	76.7385	44.9458	68.7748	91.9942	0
YIP5	107.966	125.185	120.777	33.2502	94.5537	109.838	99.5297	142.66	167.429	404.513	226.957	101.851	32.4644
ITR2	107.232	78.5183	80.8905	133.001	0	102.175	130.633	93.947	81.3893	44.9458	103.162	65.7101	146.09
MIR1	107.232	190.617	210.613	0	472.769	219.676	192.839	236.607	206.961	404.513	316.364	183.988	48.6966
MRPL50	107.232	118.518	114.812	0	283.661	89.4029	118.192	90.4675	53.4844	224.729	48.1424	55.8536	0
MTR2	107.232	86.1726	72.6896	0	94.5537	81.7398	118.192	86.988	72.0877	44.9458	75.6523	88.7087	16.2322
PLB3	107.232	63.4566	75.6717	0	94.5537	104.729	111.971	135.701	83.7147	89.8917	68.7748	82.1377	113.625
RKI1	107.232	92.8393	78.2811	133.001	189.107	145.599	180.398	194.853	81.3893	89.8917	96.2848	210.272	32.4644
SLG1	107.232	85.4319	98.7833	0	0	150.708	130.633	139.181	102.318	89.8917	61.8974	114.993	0
VPS21	107.232	142.716	125.995	66.5004	189.107	130.273	99.5297	125.263	193.009	224.729	254.467	154.419	0
DAP2	106.497	92.0986	106.984	33.2502	94.5537	107.284	118.192	208.771	97.6672	134.838	116.917	62.4246	32.4644
DRS1	106.497	43.9505	54.424	199.501	94.5537	107.284	118.192	128.742	72.0877	44.9458	48.1424	134.706	81.1609
DYN2	106.497	112.099	130.468	133.001	0	76.6311	80.8679	80.0289	86.0401	44.9458	123.795	105.136	0
ENV9	106.497	81.2344	82.7543	232.751	0	91.9573	167.956	118.304	97.6672	0	130.672	236.557	32.4644
GIR2	106.497	92.5924	92.819	0	0	102.175	93.3091	93.947	72.0877	0	103.162	88.7087	0
MGM101	106.497	114.074	116.676	232.751	94.5537	51.0874	74.6473	52.1928	60.4606	44.9458	75.6523	78.8522	16.2322
MRPL51	106.497	130.37	120.031	99.7506	94.5537	81.7398	68.4267	80.0289	169.755	44.9458	110.04	78.8522	32.4644
NFU1	106.497	113.333	103.256	33.2502	0	107.284	93.3091	114.824	72.0877	134.838	48.1424	85.4232	16.2322
RHO3	106.497	107.16	109.221	133.001	94.5537	94.5117	136.853	114.824	99.9926	44.9458	48.1424	167.561	16.2322
COA2	105.763	95.8023	99.5288	33.2502	94.5537	76.6311	74.6473	128.742	130.223	179.783	48.1424	49.2826	32.4644
HMT1	105.763	144.197	135.687	66.5004	189.107	102.175	130.633	97.4265	116.27	179.783	68.7748	318.694	0
NUP2	105.763	61.4813	65.607	33.2502	0	68.968	80.8679	104.386	41.8574	44.9458	34.3874	111.707	16.2322
PAM16	105.763	107.901	97.2922	0	0	84.2942	105.75	80.0289	79.0639	134.838	82.5298	111.707	64.9287
ZRT2	105.763	157.531	160.663	133.001	189.107	117.501	111.971	118.304	193.009	89.8917	171.937	88.7087	16.2322
ABP140	105.028	82.7159	89.4641	33.2502	94.5537	114.947	118.192	121.783	88.3655	89.8917	89.4073	98.5652	32.4644
ADP1	105.028	79.2591	88.7186	166.251	94.5537	137.936	130.633	132.222	81.3893	44.9458	48.1424	36.1406	97.3931
DAP1	105.028	177.53	164.018	33.2502	283.661	56.1961	43.5443	93.947	230.215	314.621	281.977	85.4232	0
FLC1	105.028	90.1233	104.002	66.5004	189.107	104.729	80.8679	111.345	102.318	134.838	96.2848	62.4246	81.1609
HOT13	105.028	90.864	89.0913	33.2502	94.5537	74.0767	68.4267	62.6314	111.62	44.9458	89.4073	62.4246	0
NOP6	105.028	106.913	90.2096	33.2502	0	89.4029	87.0885	76.5494	118.596	179.783	130.672	210.272	0
QDR2	105.028	126.419	137.924	33.2502	472.769	130.273	174.177	146.14	183.707	134.838	165.06	59.1391	32.4644
RPA43	105.028	72.8393	76.4173	166.251	94.5537	102.175	124.412	121.783	58.1352	44.9458	75.6523	147.848	16.2322
RPB9	105.028	114.074	102.511	133.001	283.661	94.5117	118.192	118.304	134.874	134.838	185.692	111.707	0
RVB2	105.028	114.815	105.12	133.001	0	125.164	74.6473	104.386	109.294	134.838	68.7748	137.991	32.4644
SRM1	105.028	73.0863	63.7432	33.2502	0	117.501	111.971	128.742	83.7147	89.8917	61.8974	137.991	16.2322
TOA2	105.028	121.481	126.741	232.751	94.5537	132.827	155.515	100.906	130.223	179.783	192.57	121.564	0
CDC12	104.294	101.728	95.8012	66.5004	0	79.1855	55.9855	90.4675	104.643	0	110.04	147.848	48.6966
CWH43	104.294	72.8393	73.8079	66.5004	0	122.61	143.074	146.14	113.945	89.8917	123.795	68.9957	97.3931
DIM1	104.294	81.7282	80.1449	199.501	94.5537	107.284	99.5297	118.304	58.1352	0	41.2649	193.845	16.2322
GSH2	104.294	99.259	109.594	66.5004	189.107	132.827	80.8679	128.742	72.0877	179.783	48.1424	82.1377	48.6966
RSA3	104.294	93.58	85.3637	33.2502	0	74.0767	93.3091	93.947	51.159	0	27.5099	114.993	0
YAK1	104.294	51.8517	60.761	0	0	66.4136	136.853	73.0699	67.4368	0	34.3874	16.4275	32.4644
YPT52	104.294	137.777	143.143	33.2502	94.5537	125.164	68.4267	52.1928	160.453	44.9458	96.2848	88.7087	16.2322
APE2	103.56	90.1233	85.7364	133.001	189.107	45.9787	105.75	132.222	62.786	0	55.0199	45.9971	81.1609
CKB1	103.56	107.654	115.185	66.5004	0	89.4029	74.6473	76.5494	118.596	0	137.55	137.991	32.4644
EFM5	103.56	99.9998	99.9016	33.2502	94.5537	99.6204	93.3091	114.824	95.3417	44.9458	68.7748	137.991	16.2322
GIM5	103.56	89.6294	96.5467	0	0	112.392	124.412	97.4265	86.0401	89.8917	96.2848	134.706	0
MRPL39	103.56	153.333	133.823	66.5004	94.5537	107.284	93.3091	97.4265	104.643	224.729	103.162	62.4246	0
NPA3	103.56	82.7159	95.4284	166.251	94.5537	48.533	124.412	86.988	16.2779	0	41.2649	101.851	0
PKR1	103.56	98.0245	91.3279	0	94.5537	153.262	199.059	118.304	120.921	44.9458	96.2848	164.275	16.2322
RRP5	103.56	64.6912	56.6606	166.251	189.107	171.143	118.192	139.181	74.4131	89.8917	96.2848	174.132	389.572
SLA1	103.56	91.8516	93.5645	0	0	117.501	118.192	167.017	106.969	0	137.55	59.1391	113.625
YNL134C	103.56	96.2961	110.339	33.2502	94.5537	120.055	80.8679	128.742	65.1114	44.9458	41.2649	22.9986	0
BDH1	102.825	144.938	144.634	33.2502	94.5537	91.9573	99.5297	93.947	206.961	134.838	178.815	36.1406	48.6966
ECT1	102.825	88.8887	80.8905	0	0	84.2942	87.0885	83.5085	79.0639	44.9458	41.2649	45.9971	32.4644
FRQ1	102.825	106.666	104.375	33.2502	189.107	91.9573	118.192	97.4265	158.128	224.729	144.427	91.9942	32.4644
GLO2	102.825	103.95	104.748	99.7506	94.5537	91.9573	143.074	135.701	76.7385	0	68.7748	105.136	16.2322
OST6	102.825	72.3455	75.299	33.2502	0	168.588	55.9855	93.947	53.4844	0	34.3874	121.564	0
RRP7	102.825	111.358	136.806	0	94.5537	84.2942	111.971	100.906	102.318	134.838	68.7748	187.274	32.4644
ERP5	102.091	98.7652	106.239	66.5004	0	71.5224	99.5297	80.0289	60.4606	0	116.917	88.7087	32.4644
PRD1	102.091	110.617	134.569	33.2502	0	143.045	136.853	135.701	62.786	44.9458	55.0199	49.2826	64.9287
SYH1	102.091	80.7406	81.636	0	94.5537	99.6204	105.75	83.5085	83.7147	0	68.7748	98.5652	32.4644
YPK1	102.091	129.629	124.504	133.001	94.5537	125.164	161.736	170.496	123.247	44.9458	68.7748	72.2812	0
AIM45	101.356	105.185	111.457	66.5004	0	104.729	87.0885	114.824	146.501	179.783	213.202	124.849	48.6966
AIM9	101.356	98.2714	108.102	0	94.5537	109.838	124.412	90.4675	67.4368	89.8917	116.917	68.9957	32.4644
BOL1	101.356	95.0615	99.1561	0	283.661	86.8486	99.5297	41.7542	62.786	89.8917	61.8974	59.1391	0
EMC2	101.356	103.21	81.2632	133.001	0	99.6204	93.3091	100.906	109.294	0	82.5298	111.707	16.2322
ENB1	101.356	52.5925	62.2521	0	0	135.382	74.6473	125.263	37.2065	0	6.87748	29.5696	64.9287
KRE6	101.356	73.827	83.4998	133.001	283.661	173.697	205.28	198.333	86.0401	179.783	137.55	82.1377	129.857
LYS9	101.356	93.0862	94.6828	199.501	189.107	135.382	130.633	100.906	65.1114	89.8917	27.5099	62.4246	48.6966
MNN11	101.356	91.6047	84.6181	232.751	283.661	97.0661	68.4267	118.304	81.3893	44.9458	110.04	124.849	16.2322
OPI3	101.356	134.568	144.261	0	0	97.0661	124.412	93.947	55.8098	44.9458	55.0199	32.8551	16.2322
PNO1	101.356	100.247	111.83	66.5004	0	107.284	161.736	128.742	81.3893	89.8917	89.4073	223.414	32.4644
SPT5	101.356	47.6542	67.4708	99.7506	0	104.729	80.8679	149.619	118.596	0	137.55	111.707	146.09
YMR027W	101.356	100.247	103.256	33.2502	0	120.055	105.75	132.222	118.596	89.8917	61.8974	101.851	0
YPT6	101.356	124.691	116.303	133.001	378.215	84.2942	111.971	73.0699	116.27	0	89.4073	65.7101	0
YTM1	101.356	57.0369	50.6963	232.751	189.107	89.4029	74.6473	73.0699	34.8811	44.9458	27.5099	177.417	81.1609
AIM6	100.622	120	118.913	33.2502	283.661	114.947	130.633	125.263	62.786	44.9458	68.7748	68.9957	16.2322
DAK1	100.622	93.3331	90.2096	0	283.661	86.8486	143.074	114.824	53.4844	89.8917	68.7748	45.9971	32.4644
EXG2	100.622	67.6542	65.607	0	94.5537	76.6311	43.5443	97.4265	51.159	0	34.3874	68.9957	16.2322
MDJ1	100.622	56.5431	61.8793	0	0	66.4136	93.3091	80.0289	55.8098	44.9458	20.6325	42.7116	48.6966
NIP1	100.622	99.9998	99.1561	166.251	378.215	130.273	155.515	187.894	174.406	179.783	130.672	170.846	97.3931
NOG2	100.622	73.0863	74.1807	6949.29	1985.63	130.273	99.5297	121.783	160.453	494.404	316.364	374.548	1152.49
SDD3	100.622	65.185	80.1449	99.7506	0	120.055	99.5297	160.058	95.3417	89.8917	110.04	101.851	48.6966
SEC18	100.622	83.2097	82.3815	0	0	79.1855	80.8679	90.4675	72.0877	0	55.0199	59.1391	32.4644
SPC2	100.622	98.2714	102.884	33.2502	0	71.5224	124.412	118.304	62.786	89.8917	75.6523	85.4232	0
TCB1	100.622	87.4072	90.9552	66.5004	189.107	107.284	118.192	121.783	120.921	179.783	116.917	42.7116	64.9287
LOC1	99.8872	98.5183	89.0913	0	94.5537	97.0661	93.3091	121.783	148.826	89.8917	158.182	223.414	32.4644
MRPL9	99.8872	87.6541	92.0735	66.5004	94.5537	63.8592	68.4267	73.0699	83.7147	0	41.2649	95.2797	16.2322
PPX1	99.8872	87.901	77.9083	0	94.5537	86.8486	118.192	121.783	190.683	89.8917	130.672	190.559	16.2322
RIP1	99.8872	171.851	159.544	0	94.5537	56.1961	93.3091	93.947	162.779	179.783	171.937	62.4246	0
RPF2	99.8872	100.247	108.475	66.5004	94.5537	104.729	99.5297	69.5904	95.3417	89.8917	75.6523	262.841	16.2322
ARX1	99.1527	59.0122	69.7075	365.752	94.5537	74.0767	87.0885	93.947	88.3655	0	61.8974	285.839	64.9287
CUB1	99.1527	102.963	101.393	66.5004	0	99.6204	62.2061	80.0289	90.6909	44.9458	116.917	29.5696	16.2322
FIT2	99.1527	33.5802	36.9039	0	0	71.5224	99.5297	62.6314	30.2303	89.8917	41.2649	59.1391	0
GRX7	99.1527	76.79	76.79	0	94.5537	104.729	118.192	90.4675	72.0877	0	27.5099	65.7101	16.2322
HST2	99.1527	73.0863	71.1985	33.2502	189.107	79.1855	118.192	80.0289	48.8336	0	41.2649	62.4246	16.2322
PEP1	99.1527	62.469	74.9262	133.001	0	114.947	93.3091	163.537	72.0877	89.8917	89.4073	65.7101	113.625
RTS1	99.1527	118.518	134.196	0	0	102.175	118.192	118.304	86.0401	89.8917	75.6523	72.2812	81.1609
SEH1	99.1527	93.3331	87.6003	166.251	0	76.6311	87.0885	97.4265	88.3655	89.8917	41.2649	78.8522	32.4644
SFH5	99.1527	75.0616	71.9441	0	0	86.8486	99.5297	83.5085	51.159	44.9458	41.2649	72.2812	0
SFK1	99.1527	40.4937	38.0222	0	0	109.838	99.5297	90.4675	48.8336	0	48.1424	52.5681	16.2322
TFG1	99.1527	86.4196	84.9909	66.5004	94.5537	102.175	80.8679	80.0289	99.9926	134.838	68.7748	55.8536	48.6966
UTR4	99.1527	84.1973	87.973	66.5004	0	40.8699	62.2061	66.1109	104.643	269.675	178.815	105.136	32.4644
ARP9	98.4183	98.0245	93.5645	33.2502	0	68.968	111.971	93.947	76.7385	44.9458	55.0199	49.2826	0
CPT1	98.4183	73.827	63.3704	33.2502	94.5537	163.48	149.295	160.058	69.7623	0	75.6523	88.7087	32.4644
FMP52	98.4183	86.4196	89.8369	99.7506	0	171.143	192.839	142.66	109.294	134.838	144.427	82.1377	32.4644
NCL1	98.4183	72.0986	72.3168	0	283.661	91.9573	99.5297	118.304	60.4606	134.838	6.87748	85.4232	48.6966
NOP16	98.4183	125.185	118.167	33.2502	0	86.8486	111.971	121.783	102.318	89.8917	158.182	193.845	0
PUS7	98.4183	95.3084	99.5288	33.2502	189.107	99.6204	130.633	128.742	74.4131	134.838	48.1424	85.4232	32.4644
SER33	98.4183	218.024	216.578	66.5004	189.107	127.718	80.8679	114.824	174.406	224.729	165.06	108.422	16.2322
SRP101	98.4183	74.8146	81.2632	33.2502	94.5537	74.0767	87.0885	118.304	55.8098	44.9458	48.1424	78.8522	32.4644
TRM8	98.4183	62.469	54.7968	0	0	71.5224	80.8679	69.5904	30.2303	44.9458	20.6325	98.5652	0
YNR061C	98.4183	78.2714	74.5534	66.5004	189.107	102.175	124.412	97.4265	51.159	89.8917	41.2649	95.2797	16.2322
GCN3	97.6838	77.7776	83.8726	232.751	0	76.6311	62.2061	86.988	81.3893	0	34.3874	118.278	0
KGD2	97.6838	173.333	183.401	33.2502	189.107	104.729	136.853	111.345	160.453	179.783	171.937	68.9957	48.6966
LST8	97.6838	65.432	61.5066	66.5004	189.107	76.6311	62.2061	73.0699	27.9049	89.8917	48.1424	42.7116	0
MVD1	97.6838	108.148	96.9195	99.7506	0	153.262	174.177	149.619	158.128	44.9458	110.04	151.133	48.6966
NNT1	97.6838	88.6418	92.819	99.7506	0	68.968	80.8679	97.4265	83.7147	44.9458	68.7748	134.706	0
PAM18	97.6838	101.975	90.2096	33.2502	94.5537	86.8486	136.853	76.5494	51.159	44.9458	27.5099	131.42	16.2322
RSN1	97.6838	65.9258	76.4173	66.5004	0	163.48	105.75	194.853	55.8098	44.9458	61.8974	85.4232	97.3931
AIM7	96.9493	125.432	129.723	0	283.661	74.0767	167.956	107.865	109.294	44.9458	89.4073	78.8522	32.4644
FPY1	96.9493	118.765	110.712	133.001	94.5537	89.4029	99.5297	59.1518	53.4844	0	48.1424	29.5696	16.2322
HEM13	96.9493	317.53	341.827	0	378.215	107.284	118.192	114.824	520.891	449.458	708.381	55.8536	16.2322
HIS5	96.9493	123.703	120.031	0	189.107	97.0661	93.3091	62.6314	158.128	0	151.305	85.4232	32.4644
MAK31	96.9493	100.741	90.2096	133.001	0	84.2942	68.4267	69.5904	37.2065	89.8917	89.4073	42.7116	0
STO1	96.9493	79.2591	82.3815	33.2502	94.5537	102.175	136.853	121.783	69.7623	0	68.7748	45.9971	48.6966
TOH1	96.9493	98.2714	88.7186	133.001	0	186.469	99.5297	132.222	151.152	0	165.06	49.2826	81.1609
TSR2	96.9493	76.543	70.8258	33.2502	0	102.175	80.8679	76.5494	44.1828	44.9458	34.3874	128.135	32.4644
VCX1	96.9493	83.2097	85.3637	99.7506	189.107	145.599	143.074	146.14	183.707	89.8917	130.672	59.1391	0
CMS1	96.2149	59.753	67.4708	66.5004	0	68.968	87.0885	59.1518	62.786	89.8917	89.4073	147.848	0
DGK1	96.2149	93.0862	87.973	133.001	0	84.2942	111.971	90.4675	72.0877	134.838	75.6523	108.422	32.4644
DPP1	96.2149	119.506	112.576	0	0	104.729	124.412	97.4265	76.7385	134.838	96.2848	49.2826	16.2322
ENT2	96.2149	84.6912	88.3458	0	94.5537	79.1855	80.8679	100.906	155.802	179.783	165.06	55.8536	32.4644
GNA1	96.2149	72.3455	59.6427	66.5004	0	94.5117	62.2061	80.0289	72.0877	44.9458	27.5099	55.8536	16.2322
GOT1	96.2149	86.1726	91.3279	66.5004	94.5537	163.48	230.162	163.537	144.175	134.838	240.712	131.42	16.2322
KEI1	96.2149	78.5183	82.0088	0	0	63.8592	124.412	69.5904	53.4844	89.8917	61.8974	108.422	0
MIC27	96.2149	85.9257	87.6003	33.2502	189.107	76.6311	62.2061	66.1109	83.7147	44.9458	55.0199	72.2812	0
PMU1	96.2149	87.901	89.8369	133.001	283.661	109.838	111.971	83.5085	83.7147	179.783	34.3874	65.7101	32.4644
SFT2	96.2149	113.827	102.511	99.7506	189.107	102.175	68.4267	76.5494	95.3417	179.783	123.795	68.9957	0
YFH1	96.2149	82.222	82.0088	0	0	74.0767	62.2061	100.906	44.1828	89.8917	82.5298	55.8536	0
BUD20	95.4804	105.432	99.5288	33.2502	94.5537	79.1855	130.633	104.386	88.3655	0	55.0199	177.417	16.2322
MDE1	95.4804	71.111	65.2342	99.7506	0	68.968	49.7649	100.906	123.247	359.567	240.712	98.5652	16.2322
MPD2	95.4804	69.6295	60.0155	66.5004	0	74.0767	93.3091	97.4265	30.2303	44.9458	48.1424	45.9971	16.2322
MRPS18	95.4804	103.703	107.73	0	0	107.284	99.5297	93.947	160.453	179.783	165.06	131.42	48.6966
MRS6	95.4804	72.0986	83.4998	133.001	94.5537	117.501	74.6473	107.865	72.0877	0	89.4073	131.42	48.6966
NSA2	95.4804	118.518	108.848	166.251	189.107	143.045	155.515	146.14	69.7623	0	34.3874	180.703	48.6966
OXA1	95.4804	55.8023	54.424	33.2502	94.5537	45.9787	62.2061	66.1109	13.9525	0	13.755	68.9957	16.2322
PHM8	95.4804	145.679	140.533	0	189.107	58.7505	62.2061	59.1518	141.85	89.8917	82.5298	22.9986	0
SDA1	95.4804	62.469	51.0691	166.251	0	86.8486	55.9855	97.4265	62.786	89.8917	48.1424	128.135	48.6966
TOM71	95.4804	75.3085	81.636	33.2502	0	63.8592	62.2061	69.5904	48.8336	44.9458	68.7748	65.7101	48.6966
YER134C	95.4804	107.654	101.765	0	189.107	89.4029	74.6473	100.906	67.4368	89.8917	61.8974	39.4261	16.2322
ALG6	94.7459	83.7035	77.9083	99.7506	0	125.164	74.6473	111.345	69.7623	0	55.0199	62.4246	48.6966
CAB5	94.7459	90.6171	85.7364	33.2502	94.5537	79.1855	93.3091	69.5904	41.8574	89.8917	27.5099	42.7116	0
MRPL13	94.7459	74.3208	74.1807	33.2502	0	79.1855	93.3091	90.4675	46.5082	134.838	82.5298	72.2812	0
MRPL31	94.7459	115.308	106.611	0	94.5537	76.6311	49.7649	66.1109	132.548	89.8917	116.917	82.1377	0
NMT1	94.7459	81.2344	74.9262	99.7506	189.107	63.8592	62.2061	86.988	53.4844	44.9458	41.2649	98.5652	16.2322
NOT5	94.7459	76.79	86.8547	0	0	56.1961	80.8679	76.5494	27.9049	89.8917	48.1424	52.5681	32.4644
PAM1	94.7459	63.7036	84.9909	33.2502	94.5537	66.4136	111.971	80.0289	76.7385	0	123.795	29.5696	48.6966
BRE1	94.0115	65.9258	64.4887	66.5004	94.5537	79.1855	62.2061	52.1928	46.5082	44.9458	20.6325	59.1391	48.6966
COS3	94.0115	71.6048	82.3815	99.7506	283.661	160.925	149.295	149.619	139.525	44.9458	68.7748	32.8551	0
CUE5	94.0115	81.4813	88.3458	0	94.5537	71.5224	130.633	97.4265	55.8098	89.8917	13.755	39.4261	32.4644
GCD6	94.0115	67.6542	65.607	99.7506	0	135.382	62.2061	107.865	72.0877	89.8917	82.5298	128.135	97.3931
GLC3	94.0115	187.16	188.247	0	189.107	117.501	99.5297	104.386	172.08	269.675	103.162	3.28551	32.4644
GNT1	94.0115	62.469	74.5534	33.2502	0	74.0767	80.8679	118.304	53.4844	0	34.3874	75.5667	48.6966
GPI17	94.0115	73.5801	82.7543	0	0	81.7398	74.6473	86.988	41.8574	89.8917	82.5298	111.707	32.4644
MRP10	94.0115	118.765	120.777	33.2502	0	68.968	93.3091	55.6723	97.6672	0	110.04	85.4232	0
PCL5	94.0115	155.555	143.515	33.2502	189.107	63.8592	136.853	121.783	244.168	314.621	330.119	85.4232	32.4644
RAS1	94.0115	70.6171	70.453	0	0	89.4029	130.633	83.5085	44.1828	0	27.5099	131.42	0
RBG2	94.0115	51.6048	50.6963	66.5004	189.107	84.2942	68.4267	69.5904	20.9287	0	34.3874	65.7101	16.2322
URE2	94.0115	81.2344	84.2454	0	94.5537	114.947	111.971	111.345	60.4606	89.8917	75.6523	95.2797	32.4644
CHS7	93.277	65.9258	59.6427	99.7506	94.5537	125.164	111.971	62.6314	44.1828	134.838	68.7748	65.7101	16.2322
ETR1	93.277	121.728	120.404	33.2502	94.5537	89.4029	74.6473	121.783	113.945	0	82.5298	16.4275	0
NCE103	93.277	75.5554	73.8079	0	94.5537	89.4029	74.6473	66.1109	83.7147	89.8917	82.5298	59.1391	0
PMC1	93.277	71.111	79.0266	133.001	94.5537	104.729	111.971	139.181	76.7385	44.9458	75.6523	32.8551	48.6966
RNQ1	93.277	65.432	70.8258	33.2502	94.5537	81.7398	124.412	111.345	102.318	134.838	123.795	105.136	32.4644
SCJ1	93.277	56.5431	48.8325	133.001	0	76.6311	74.6473	38.2747	62.786	0	34.3874	101.851	16.2322
SNL1	93.277	112.099	108.475	33.2502	94.5537	40.8699	80.8679	55.6723	48.8336	134.838	68.7748	88.7087	0
URA7	93.277	52.8394	56.2878	332.502	0	143.045	223.942	281.841	202.311	134.838	261.344	387.69	146.09
YBL036C	93.277	87.901	84.9909	99.7506	94.5537	109.838	74.6473	97.4265	137.199	134.838	213.202	193.845	64.9287
CAB1	92.5425	80.9875	75.6717	66.5004	0	120.055	80.8679	90.4675	72.0877	134.838	34.3874	65.7101	16.2322
CTR2	92.5425	98.5183	83.1271	0	0	99.6204	93.3091	100.906	120.921	89.8917	61.8974	118.278	0
DST1	92.5425	62.7159	69.3347	0	0	109.838	62.2061	114.824	27.9049	0	41.2649	55.8536	32.4644
EHT1	92.5425	74.8146	76.0445	0	189.107	130.273	124.412	55.6723	60.4606	89.8917	34.3874	62.4246	0
ENT3	92.5425	100.741	111.085	66.5004	94.5537	66.4136	55.9855	100.906	83.7147	0	48.1424	72.2812	48.6966
GPA1	92.5425	83.2097	69.3347	33.2502	189.107	86.8486	62.2061	125.263	62.786	0	34.3874	98.5652	81.1609
NOP13	92.5425	68.3949	69.3347	0	0	99.6204	93.3091	114.824	32.5557	0	34.3874	137.991	32.4644
PUF6	92.5425	73.3332	72.6896	99.7506	94.5537	74.0767	99.5297	73.0699	58.1352	0	61.8974	183.988	48.6966
PWP1	92.5425	72.8393	83.4998	66.5004	0	79.1855	111.971	132.222	69.7623	44.9458	61.8974	266.126	32.4644
REE1	92.5425	120.247	126.741	0	189.107	89.4029	87.0885	76.5494	130.223	44.9458	68.7748	88.7087	32.4644
TRM1	92.5425	51.111	44.3593	199.501	94.5537	63.8592	80.8679	135.701	41.8574	0	89.4073	114.993	16.2322
YOR342C	92.5425	78.7653	75.6717	0	189.107	53.6418	68.4267	69.5904	95.3417	134.838	48.1424	180.703	16.2322
ALB1	91.8081	104.444	101.393	99.7506	0	104.729	87.0885	80.0289	76.7385	0	75.6523	305.552	16.2322
DID2	91.8081	127.16	121.895	33.2502	0	43.4243	55.9855	59.1518	88.3655	0	137.55	52.5681	16.2322
LOA1	91.8081	67.4073	61.8793	0	0	63.8592	80.8679	69.5904	60.4606	0	34.3874	62.4246	0
LRP1	91.8081	91.8516	96.9195	33.2502	0	79.1855	80.8679	90.4675	106.969	89.8917	103.162	160.99	16.2322
MRPL23	91.8081	108.889	99.1561	0	189.107	79.1855	87.0885	100.906	69.7623	0	89.4073	39.4261	16.2322
MTD1	91.8081	244.197	233.725	0	94.5537	81.7398	111.971	97.4265	195.334	179.783	220.08	124.849	32.4644
NAN1	91.8081	51.111	49.9508	199.501	94.5537	89.4029	55.9855	73.0699	41.8574	179.783	20.6325	134.706	178.554
PRS5	91.8081	83.9504	83.1271	332.502	0	140.49	105.75	156.578	95.3417	224.729	110.04	154.419	32.4644
RRP1	91.8081	60.7406	64.4887	166.251	0	68.968	62.2061	107.865	44.1828	0	41.2649	151.133	0
APL5	91.0736	57.5307	52.1874	33.2502	94.5537	99.6204	43.5443	83.5085	60.4606	44.9458	68.7748	68.9957	16.2322
HRB1	91.0736	83.9504	69.7075	0	0	56.1961	74.6473	90.4675	123.247	89.8917	96.2848	111.707	0
MTR4	91.0736	43.9505	47.7142	365.752	0	112.392	43.5443	80.0289	51.159	0	41.2649	141.277	48.6966
OPI10	91.0736	36.79	29.0758	0	0	61.3049	55.9855	52.1928	37.2065	44.9458	6.87748	6.57101	16.2322
PAL2	91.0736	56.2962	65.607	0	0	48.533	62.2061	66.1109	51.159	134.838	89.4073	32.8551	0
RMT2	91.0736	67.9011	58.5244	133.001	94.5537	122.61	93.3091	111.345	81.3893	134.838	75.6523	144.562	48.6966
SAM35	91.0736	90.3702	83.8726	33.2502	0	104.729	118.192	90.4675	44.1828	89.8917	27.5099	88.7087	16.2322
TAE1	91.0736	59.506	55.9151	0	94.5537	74.0767	55.9855	59.1518	34.8811	0	27.5099	42.7116	16.2322
YBR137W	91.0736	83.7035	90.9552	99.7506	189.107	79.1855	87.0885	83.5085	88.3655	44.9458	55.0199	45.9971	0
YGR130C	91.0736	115.802	119.658	0	189.107	71.5224	87.0885	45.2338	125.572	89.8917	75.6523	36.1406	32.4644
BDF1	90.3391	77.2838	84.6181	99.7506	94.5537	63.8592	62.2061	114.824	97.6672	89.8917	116.917	82.1377	81.1609
BNA6	90.3391	89.6294	93.1918	33.2502	0	74.0767	105.75	111.345	44.1828	89.8917	41.2649	68.9957	16.2322
CRM1	90.3391	76.79	98.0378	133.001	0	135.382	99.5297	163.537	90.6909	44.9458	41.2649	118.278	146.09
DCP2	90.3391	54.074	63.7432	33.2502	94.5537	84.2942	118.192	107.865	37.2065	89.8917	0	78.8522	64.9287
FPS1	90.3391	72.3455	70.0802	0	189.107	114.947	136.853	187.894	125.572	134.838	55.0199	118.278	64.9287
PGC1	90.3391	79.7529	71.9441	0	0	56.1961	55.9855	66.1109	86.0401	179.783	55.0199	68.9957	32.4644
PHO91	90.3391	51.3579	50.3236	0	0	104.729	55.9855	80.0289	58.1352	44.9458	34.3874	62.4246	64.9287
BSD2	89.6047	72.8393	67.8436	0	0	68.968	49.7649	55.6723	53.4844	0	68.7748	52.5681	0
DID4	89.6047	129.382	125.623	33.2502	0	84.2942	62.2061	118.304	74.4131	44.9458	27.5099	78.8522	16.2322
ERG8	89.6047	76.79	68.9619	66.5004	0	107.284	74.6473	83.5085	41.8574	44.9458	20.6325	68.9957	0
PAN6	89.6047	106.42	88.3458	133.001	0	117.501	68.4267	73.0699	109.294	0	103.162	108.422	16.2322
SNX3	89.6047	70.6171	69.3347	33.2502	94.5537	84.2942	93.3091	86.988	81.3893	89.8917	61.8974	42.7116	32.4644
TRP3	89.6047	78.2714	90.2096	133.001	94.5537	109.838	87.0885	93.947	62.786	44.9458	6.87748	75.5667	32.4644
YJL068C	89.6047	99.9998	98.7833	66.5004	189.107	91.9573	87.0885	73.0699	86.0401	0	103.162	72.2812	0
YPK2	89.6047	59.0122	59.27	33.2502	0	58.7505	49.7649	86.988	37.2065	89.8917	13.755	3.28551	64.9287
AIM46	88.8702	59.506	77.1628	0	94.5537	74.0767	74.6473	73.0699	51.159	0	20.6325	49.2826	0
ATG42	88.8702	97.0368	87.2275	0	94.5537	74.0767	87.0885	100.906	81.3893	89.8917	61.8974	9.85652	32.4644
BUD5	88.8702	70.1233	70.0802	166.251	0	66.4136	111.971	38.2747	30.2303	89.8917	48.1424	36.1406	0
DSD1	88.8702	69.8764	72.6896	33.2502	94.5537	68.968	124.412	55.6723	55.8098	44.9458	68.7748	39.4261	0
HST1	88.8702	72.5924	66.3525	0	94.5537	79.1855	55.9855	114.824	116.27	134.838	89.4073	82.1377	64.9287
IGO2	88.8702	135.555	127.114	0	0	114.947	143.074	86.988	106.969	44.9458	55.0199	68.9957	16.2322
MRPL49	88.8702	94.8146	91.3279	199.501	0	61.3049	111.971	59.1518	34.8811	0	41.2649	45.9971	0
NAB6	88.8702	72.8393	84.9909	0	378.215	102.175	80.8679	121.783	41.8574	44.9458	48.1424	65.7101	97.3931
OCA2	88.8702	88.6418	91.7007	0	0	63.8592	111.971	83.5085	39.5319	89.8917	48.1424	52.5681	32.4644
RAM2	88.8702	86.4196	74.9262	33.2502	0	102.175	93.3091	41.7542	62.786	44.9458	41.2649	85.4232	32.4644
SDH4	88.8702	152.592	164.763	0	283.661	102.175	111.971	80.0289	260.446	1033.75	646.484	45.9971	16.2322
TAF10	88.8702	96.543	78.2811	99.7506	189.107	81.7398	80.8679	86.988	102.318	44.9458	41.2649	85.4232	0
TVP15	88.8702	111.852	117.794	0	0	94.5117	111.971	111.345	69.7623	89.8917	55.0199	65.7101	16.2322
AVT7	88.1358	122.716	121.895	33.2502	0	91.9573	93.3091	97.4265	74.4131	134.838	89.4073	42.7116	16.2322
DBP9	88.1358	74.8146	81.2632	66.5004	94.5537	74.0767	87.0885	83.5085	67.4368	0	34.3874	164.275	113.625
DIG1	88.1358	65.185	65.2342	0	0	74.0767	80.8679	107.865	76.7385	44.9458	75.6523	85.4232	16.2322
EIS1	88.1358	84.6912	96.9195	33.2502	0	74.0767	87.0885	121.783	183.707	179.783	144.427	42.7116	81.1609
PLB1	88.1358	90.6171	102.138	0	94.5537	99.6204	93.3091	66.1109	86.0401	0	68.7748	36.1406	32.4644
PRP43	88.1358	68.3949	61.1338	33.2502	94.5537	112.392	74.6473	132.222	74.4131	89.8917	48.1424	170.846	0
RFA2	88.1358	72.0986	79.7722	166.251	0	97.0661	74.6473	83.5085	41.8574	44.9458	41.2649	111.707	16.2322
SDH2	88.1358	159.753	152.462	0	378.215	48.533	80.8679	73.0699	206.961	44.9458	213.202	39.4261	0
STF1	88.1358	242.962	231.488	0	189.107	51.0874	80.8679	76.5494	188.358	224.729	233.834	3.28551	16.2322
SXM1	88.1358	51.111	55.5423	99.7506	0	125.164	62.2061	139.181	76.7385	0	68.7748	78.8522	97.3931
FLC2	87.4013	64.9381	61.8793	0	0	91.9573	62.2061	104.386	67.4368	44.9458	55.0199	32.8551	48.6966
HIS7	87.4013	74.8146	80.8905	99.7506	0	68.968	55.9855	170.496	127.897	44.9458	61.8974	85.4232	16.2322
MEU1	87.4013	65.432	61.8793	199.501	0	114.947	99.5297	104.386	58.1352	44.9458	48.1424	160.99	32.4644
NOC2	87.4013	68.6418	67.4708	66.5004	0	117.501	105.75	121.783	88.3655	0	61.8974	229.986	48.6966
NUP57	87.4013	66.9134	68.5892	166.251	94.5537	68.968	130.633	97.4265	106.969	89.8917	75.6523	111.707	0
SDO1	87.4013	80.4936	77.1628	66.5004	0	74.0767	105.75	73.0699	41.8574	44.9458	13.755	91.9942	16.2322
SPO12	87.4013	97.2837	88.7186	0	94.5537	84.2942	74.6473	100.906	86.0401	89.8917	96.2848	95.2797	0
TIM44	87.4013	85.6788	88.3458	66.5004	94.5537	66.4136	111.971	90.4675	55.8098	44.9458	41.2649	62.4246	16.2322
TUM1	87.4013	78.2714	78.6539	33.2502	189.107	91.9573	62.2061	118.304	46.5082	179.783	20.6325	88.7087	48.6966
YRB2	87.4013	89.6294	92.0735	0	0	86.8486	62.2061	97.4265	88.3655	44.9458	96.2848	85.4232	0
APS1	86.6668	84.9381	74.5534	0	94.5537	68.968	87.0885	90.4675	102.318	224.729	96.2848	75.5667	0
CYB5	86.6668	106.666	107.357	0	189.107	89.4029	87.0885	97.4265	88.3655	89.8917	123.795	147.848	48.6966
KAP104	86.6668	46.1727	50.6963	33.2502	94.5537	79.1855	62.2061	121.783	51.159	89.8917	41.2649	105.136	81.1609
MMS2	86.6668	83.9504	79.7722	0	0	61.3049	68.4267	76.5494	30.2303	89.8917	13.755	49.2826	0
MRP17	86.6668	90.1233	81.2632	33.2502	189.107	68.968	99.5297	52.1928	58.1352	44.9458	61.8974	42.7116	0
MRPL38	86.6668	111.111	98.0378	0	0	68.968	62.2061	52.1928	109.294	0	144.427	36.1406	0
PEX2	86.6668	66.1727	66.7253	33.2502	94.5537	61.3049	93.3091	55.6723	62.786	44.9458	48.1424	59.1391	16.2322
RNA14	86.6668	56.2962	58.8972	66.5004	0	56.1961	55.9855	86.988	37.2065	0	61.8974	78.8522	48.6966
SDS24	86.6668	94.5677	90.5824	0	189.107	86.8486	62.2061	55.6723	93.0163	44.9458	116.917	3.28551	16.2322
SSE2	86.6668	75.0616	75.6717	66.5004	94.5537	51.0874	31.103	83.5085	58.1352	89.8917	34.3874	13.142	0
TRS33	86.6668	72.0986	74.9262	99.7506	94.5537	79.1855	99.5297	83.5085	39.5319	44.9458	27.5099	29.5696	32.4644
VPS70	86.6668	72.8393	76.79	66.5004	0	89.4029	55.9855	90.4675	86.0401	0	103.162	42.7116	0
ARI1	85.9324	87.6541	86.8547	0	0	148.153	93.3091	139.181	46.5082	0	55.0199	52.5681	0
CMC1	85.9324	72.3455	68.5892	66.5004	0	104.729	99.5297	59.1518	72.0877	44.9458	27.5099	55.8536	0
CNL1	85.9324	83.4566	81.636	33.2502	0	71.5224	74.6473	93.947	69.7623	0	75.6523	55.8536	16.2322
FRD1	85.9324	101.234	89.0913	66.5004	0	135.382	136.853	142.66	162.779	179.783	158.182	78.8522	16.2322
HOM3	85.9324	108.642	106.239	0	189.107	91.9573	74.6473	97.4265	153.477	359.567	116.917	88.7087	81.1609
IZH2	85.9324	248.148	242.299	232.751	661.876	94.5117	111.971	76.5494	379.042	269.675	447.036	124.849	48.6966
MIM2	85.9324	65.6789	65.607	0	94.5537	74.0767	124.412	121.783	60.4606	44.9458	55.0199	72.2812	32.4644
MPP10	85.9324	64.6912	80.1449	299.252	0	63.8592	87.0885	125.263	48.8336	89.8917	55.0199	147.848	16.2322
PRO1	85.9324	57.5307	66.3525	99.7506	0	86.8486	68.4267	139.181	46.5082	89.8917	48.1424	98.5652	32.4644
SIC1	85.9324	71.3579	74.9262	33.2502	0	76.6311	99.5297	66.1109	65.1114	89.8917	61.8974	59.1391	0
SLA2	85.9324	74.3208	67.4708	0	94.5537	86.8486	105.75	107.865	97.6672	134.838	116.917	52.5681	32.4644
UTP9	85.9324	63.9505	58.1517	66.5004	189.107	66.4136	99.5297	80.0289	62.786	44.9458	89.4073	200.416	32.4644
WHI2	85.9324	86.1726	90.2096	33.2502	378.215	86.8486	124.412	80.0289	86.0401	0	82.5298	72.2812	48.6966
WSC2	85.9324	50.1233	50.3236	0	0	91.9573	55.9855	73.0699	60.4606	89.8917	20.6325	59.1391	16.2322
ADE2	85.1979	205.679	204.276	166.251	0	117.501	111.971	125.263	139.525	134.838	103.162	78.8522	64.9287
AGA1	85.1979	13.3333	17.5201	0	0	53.6418	31.103	34.7952	25.5795	44.9458	41.2649	19.713	16.2322
AGE1	85.1979	111.605	97.665	0	0	84.2942	93.3091	104.386	151.152	89.8917	137.55	160.99	32.4644
ARP4	85.1979	64.1974	62.9976	66.5004	94.5537	68.968	55.9855	104.386	32.5557	0	34.3874	62.4246	0
COA3	85.1979	137.284	126.368	33.2502	283.661	89.4029	74.6473	55.6723	74.4131	134.838	75.6523	52.5681	16.2322
DSE3	85.1979	56.5431	68.9619	0	189.107	53.6418	74.6473	73.0699	44.1828	0	27.5099	68.9957	0
EAF3	85.1979	99.7529	99.5288	33.2502	0	76.6311	111.971	73.0699	44.1828	44.9458	41.2649	62.4246	32.4644
HEM15	85.1979	85.9257	93.1918	33.2502	283.661	127.718	74.6473	128.742	118.596	224.729	144.427	55.8536	16.2322
MNT2	85.1979	42.716	52.1874	99.7506	0	89.4029	105.75	83.5085	32.5557	0	20.6325	72.2812	0
MRPL6	85.1979	102.963	89.8369	166.251	94.5537	107.284	74.6473	76.5494	72.0877	0	82.5298	49.2826	16.2322
PGM1	85.1979	79.7529	83.8726	33.2502	0	114.947	105.75	118.304	111.62	44.9458	137.55	82.1377	48.6966
RSM18	85.1979	138.765	115.558	0	189.107	79.1855	87.0885	73.0699	127.897	134.838	110.04	65.7101	32.4644
SPT6	85.1979	62.9628	57.7789	33.2502	189.107	94.5117	62.2061	100.906	55.8098	44.9458	68.7748	42.7116	97.3931
MRPL37	84.4634	123.21	112.948	166.251	189.107	86.8486	99.5297	62.6314	99.9926	0	48.1424	62.4246	0
MRPS16	84.4634	92.0986	83.1271	0	189.107	74.0767	62.2061	52.1928	74.4131	89.8917	75.6523	78.8522	0
SDC1	84.4634	68.6418	73.0624	0	0	51.0874	37.3236	93.947	41.8574	44.9458	55.0199	62.4246	0
ARO7	83.729	101.975	87.2275	99.7506	0	109.838	149.295	146.14	67.4368	89.8917	110.04	170.846	16.2322
EDC3	83.729	71.111	76.0445	0	0	51.0874	105.75	76.5494	41.8574	0	41.2649	55.8536	32.4644
GCR1	83.729	52.0986	61.5066	0	0	74.0767	130.633	118.304	51.159	44.9458	41.2649	42.7116	64.9287
MAK11	83.729	68.3949	75.299	133.001	0	84.2942	62.2061	104.386	72.0877	44.9458	41.2649	131.42	16.2322
MIC26	83.729	94.5677	92.819	99.7506	94.5537	84.2942	55.9855	86.988	83.7147	89.8917	55.0199	65.7101	48.6966
MRPL44	83.729	98.2714	99.1561	0	0	48.533	80.8679	52.1928	53.4844	0	20.6325	78.8522	0
MSS116	83.729	78.5183	85.7364	66.5004	0	112.392	43.5443	118.304	93.0163	89.8917	27.5099	62.4246	48.6966
NOP12	83.729	84.1973	81.636	33.2502	94.5537	84.2942	49.7649	97.4265	58.1352	179.783	48.1424	151.133	0
PLP2	83.729	99.259	84.6181	33.2502	94.5537	71.5224	68.4267	73.0699	60.4606	0	41.2649	75.5667	0
ROX3	83.729	71.6048	84.2454	33.2502	0	61.3049	62.2061	66.1109	65.1114	44.9458	89.4073	91.9942	32.4644
SPN1	83.729	90.3702	99.9016	99.7506	94.5537	104.729	62.2061	76.5494	76.7385	44.9458	68.7748	72.2812	48.6966
TYR1	83.729	53.0863	46.5959	0	0	71.5224	68.4267	52.1928	23.2541	89.8917	13.755	62.4246	16.2322
YCF1	83.729	39.5061	42.1227	133.001	94.5537	114.947	111.971	135.701	41.8574	0	34.3874	55.8536	97.3931
EDC2	82.9945	86.4196	87.973	0	189.107	122.61	124.412	111.345	90.6909	89.8917	61.8974	59.1391	0
ERG12	82.9945	60.4937	68.2164	66.5004	189.107	71.5224	93.3091	97.4265	25.5795	89.8917	75.6523	82.1377	32.4644
GDS1	82.9945	65.9258	70.0802	66.5004	283.661	125.164	118.192	149.619	51.159	44.9458	41.2649	101.851	81.1609
GFD1	82.9945	87.901	92.819	0	0	33.2068	74.6473	86.988	44.1828	0	82.5298	68.9957	0
GUP1	82.9945	56.2962	55.5423	33.2502	189.107	91.9573	80.8679	104.386	51.159	44.9458	27.5099	45.9971	16.2322
HUB1	82.9945	109.136	88.7186	33.2502	0	94.5117	149.295	139.181	86.0401	44.9458	48.1424	72.2812	0
NST1	82.9945	39.753	46.9687	0	0	30.6524	68.4267	59.1518	60.4606	44.9458	20.6325	65.7101	32.4644
OSM1	82.9945	63.7036	74.5534	33.2502	94.5537	71.5224	80.8679	45.2338	53.4844	44.9458	75.6523	45.9971	64.9287
POP8	82.9945	61.7283	54.7968	99.7506	0	79.1855	49.7649	104.386	58.1352	44.9458	55.0199	59.1391	0
RPC34	82.9945	54.074	58.5244	33.2502	94.5537	71.5224	68.4267	69.5904	18.6033	0	0	68.9957	0
SUA7	82.9945	78.0245	70.0802	133.001	94.5537	104.729	124.412	90.4675	109.294	89.8917	144.427	75.5667	32.4644
TSR4	82.9945	60.4937	68.5892	133.001	0	109.838	62.2061	76.5494	65.1114	89.8917	68.7748	105.136	32.4644
BCH1	82.26	93.0862	99.1561	33.2502	0	104.729	93.3091	90.4675	83.7147	89.8917	82.5298	55.8536	64.9287
CYC8	82.26	48.148	49.9508	0	94.5537	58.7505	62.2061	80.0289	97.6672	134.838	75.6523	55.8536	162.322
GPI15	82.26	84.1973	75.299	232.751	0	63.8592	93.3091	76.5494	48.8336	179.783	34.3874	62.4246	0
NTS2-1	82.26	22.4691	23.1116	33.2502	378.215	76.6311	43.5443	111.345	69.7623	0	116.917	174.132	194.786
PXR1	82.26	47.9011	52.5602	66.5004	94.5537	81.7398	87.0885	93.947	51.159	89.8917	110.04	187.274	0
QNS1	82.26	81.4813	82.3815	133.001	0	117.501	80.8679	146.14	79.0639	134.838	48.1424	49.2826	16.2322
RME1	82.26	63.4566	81.636	33.2502	189.107	94.5117	68.4267	69.5904	95.3417	89.8917	48.1424	62.4246	16.2322
RRP42	82.26	78.0245	70.0802	0	0	66.4136	37.3236	66.1109	60.4606	44.9458	75.6523	157.704	0
SKI6	82.26	74.5677	77.1628	0	94.5537	58.7505	105.75	90.4675	37.2065	44.9458	48.1424	91.9942	48.6966
SNF6	82.26	67.4073	68.5892	133.001	0	45.9787	62.2061	52.1928	48.8336	89.8917	34.3874	62.4246	16.2322
SNR191	82.26	61.9752	63.3704	6683.29	1891.07	91.9573	74.6473	83.5085	93.0163	359.567	226.957	275.983	1038.86
TPS3	82.26	84.6912	83.1271	0	189.107	63.8592	55.9855	90.4675	116.27	44.9458	34.3874	29.5696	16.2322
YOR302W	82.26	47.9011	57.7789	0	94.5537	38.3155	87.0885	69.5904	11.627	0	34.3874	68.9957	0
YPS1	82.26	55.5554	52.1874	33.2502	378.215	135.382	143.074	205.292	90.6909	44.9458	82.5298	19.713	48.6966
BER1	81.5256	62.469	62.9976	33.2502	0	45.9787	68.4267	45.2338	16.2779	89.8917	27.5099	36.1406	32.4644
CDC1	81.5256	66.4196	72.3168	66.5004	0	104.729	62.2061	86.988	109.294	134.838	61.8974	55.8536	0
CTR1	81.5256	39.9999	52.1874	0	189.107	35.7612	111.971	90.4675	30.2303	44.9458	41.2649	82.1377	16.2322
HLJ1	81.5256	79.9998	91.3279	0	0	74.0767	80.8679	86.988	48.8336	134.838	61.8974	68.9957	0
LHS1	81.5256	60.7406	62.2521	0	94.5537	89.4029	74.6473	90.4675	48.8336	44.9458	41.2649	49.2826	16.2322
NPL6	81.5256	68.6418	89.8369	66.5004	94.5537	71.5224	74.6473	66.1109	53.4844	44.9458	34.3874	62.4246	0
NUP49	81.5256	79.2591	84.2454	99.7506	94.5537	89.4029	74.6473	135.701	39.5319	89.8917	48.1424	101.851	16.2322
PHO85	81.5256	61.7283	70.453	33.2502	94.5537	76.6311	99.5297	62.6314	34.8811	0	27.5099	49.2826	16.2322
SRG1	81.5256	102.963	101.765	33.2502	94.5537	45.9787	74.6473	45.2338	39.5319	44.9458	27.5099	62.4246	0
TMA17	81.5256	188.642	205.022	0	189.107	76.6311	74.6473	86.988	148.826	179.783	226.957	3.28551	16.2322
UGA1	81.5256	100.247	97.2922	0	283.661	84.2942	111.971	69.5904	130.223	44.9458	110.04	32.8551	0
YAP1	81.5256	66.6665	76.79	66.5004	0	104.729	155.515	111.345	46.5082	44.9458	27.5099	62.4246	48.6966
ADE4	80.7911	134.074	129.723	199.501	283.661	99.6204	62.2061	100.906	97.6672	0	61.8974	157.704	97.3931
ENT1	80.7911	70.864	90.2096	0	94.5537	43.4243	62.2061	76.5494	76.7385	44.9458	165.06	75.5667	0
GAL80	80.7911	61.2344	61.5066	33.2502	0	58.7505	37.3236	62.6314	76.7385	0	41.2649	72.2812	32.4644
GIC2	80.7911	56.5431	58.1517	0	94.5537	43.4243	37.3236	52.1928	74.4131	134.838	103.162	85.4232	0
IGD1	80.7911	55.0616	52.9329	0	0	51.0874	62.2061	52.1928	58.1352	0	68.7748	13.142	16.2322
MED11	80.7911	62.2221	68.5892	0	0	68.968	62.2061	59.1518	23.2541	44.9458	20.6325	29.5696	0
NSG2	80.7911	110.864	93.9373	0	0	91.9573	99.5297	111.345	174.406	44.9458	213.202	105.136	16.2322
PCS60	80.7911	75.0616	71.9441	0	189.107	56.1961	87.0885	55.6723	81.3893	89.8917	75.6523	62.4246	16.2322
RSC9	80.7911	43.2098	48.4597	133.001	0	43.4243	80.8679	80.0289	51.159	89.8917	34.3874	39.4261	0
TRP1	80.7911	95.0615	77.1628	99.7506	0	84.2942	93.3091	66.1109	53.4844	44.9458	34.3874	72.2812	0
UTP4	80.7911	50.1233	46.9687	0	94.5537	84.2942	62.2061	111.345	51.159	0	96.2848	187.274	32.4644
VMA22	80.7911	86.4196	79.7722	33.2502	189.107	66.4136	74.6473	52.1928	88.3655	179.783	61.8974	65.7101	16.2322
VPS60	80.7911	96.7899	101.393	0	0	66.4136	55.9855	100.906	60.4606	89.8917	82.5298	65.7101	0
ATP11	80.0566	86.6665	89.4641	66.5004	94.5537	53.6418	68.4267	76.5494	74.4131	134.838	13.755	42.7116	32.4644
CKA1	80.0566	81.2344	69.7075	33.2502	94.5537	104.729	74.6473	198.333	88.3655	134.838	96.2848	114.993	32.4644
COA1	80.0566	87.6541	87.973	33.2502	0	79.1855	87.0885	52.1928	67.4368	44.9458	55.0199	52.5681	0
ERC1	80.0566	28.1481	32.4307	99.7506	0	61.3049	68.4267	90.4675	39.5319	0	27.5099	62.4246	16.2322
FAU1	80.0566	55.8023	57.0334	99.7506	94.5537	56.1961	37.3236	69.5904	51.159	44.9458	41.2649	128.135	16.2322
GSH1	80.0566	61.4813	65.9798	33.2502	0	84.2942	99.5297	128.742	81.3893	44.9458	116.917	26.2841	64.9287
KAE1	80.0566	51.8517	56.6606	0	0	81.7398	68.4267	48.7133	55.8098	0	41.2649	62.4246	16.2322
MIC19	80.0566	102.222	97.665	0	0	81.7398	74.6473	97.4265	181.382	89.8917	192.57	114.993	16.2322
MIM1	80.0566	108.889	106.611	33.2502	94.5537	71.5224	93.3091	66.1109	55.8098	89.8917	75.6523	78.8522	0
MRP7	80.0566	83.9504	86.1092	33.2502	0	84.2942	43.5443	90.4675	83.7147	0	41.2649	36.1406	16.2322
NCE101	80.0566	61.7283	57.7789	0	0	48.533	87.0885	55.6723	65.1114	89.8917	34.3874	49.2826	0
NVJ2	80.0566	76.79	77.1628	33.2502	94.5537	71.5224	43.5443	76.5494	72.0877	0	61.8974	62.4246	97.3931
PTC2	80.0566	72.8393	82.3815	0	94.5537	102.175	74.6473	62.6314	53.4844	0	61.8974	68.9957	64.9287
RFC1	80.0566	46.6666	49.578	66.5004	94.5537	81.7398	62.2061	104.386	79.0639	44.9458	55.0199	75.5667	32.4644
RSC8	80.0566	69.6295	82.0088	66.5004	94.5537	66.4136	74.6473	90.4675	120.921	44.9458	103.162	121.564	16.2322
SHO1	80.0566	45.9258	61.8793	0	189.107	125.164	118.192	90.4675	34.8811	0	34.3874	78.8522	0
SOL2	80.0566	70.1233	56.2878	0	0	58.7505	55.9855	48.7133	46.5082	89.8917	75.6523	32.8551	16.2322
SUB1	80.0566	103.703	100.274	0	94.5537	61.3049	74.6473	62.6314	65.1114	89.8917	96.2848	62.4246	0
SUN4	80.0566	91.3578	85.7364	99.7506	378.215	166.034	99.5297	104.386	195.334	179.783	261.344	170.846	146.09
SUR1	80.0566	69.8764	71.5713	0	189.107	89.4029	105.75	80.0289	79.0639	44.9458	68.7748	42.7116	16.2322
TMA46	80.0566	56.2962	55.5423	0	0	48.533	43.5443	73.0699	16.2779	0	27.5099	65.7101	0
URA8	80.0566	70.864	80.5177	33.2502	0	74.0767	68.4267	55.6723	104.643	44.9458	89.4073	42.7116	48.6966
VAN1	80.0566	59.2591	62.2521	66.5004	94.5537	125.164	99.5297	153.099	190.683	89.8917	137.55	180.703	32.4644
YGK1	80.0566	98.7652	96.1739	266.002	94.5537	86.8486	80.8679	83.5085	41.8574	134.838	96.2848	85.4232	0
YGL242C	80.0566	83.2097	77.5356	33.2502	94.5537	51.0874	80.8679	73.0699	83.7147	89.8917	89.4073	59.1391	16.2322
YKR018C	80.0566	78.2714	85.7364	0	0	130.273	80.8679	142.66	69.7623	44.9458	34.3874	55.8536	129.857
YML108W	80.0566	48.6419	53.3057	0	283.661	71.5224	93.3091	69.5904	37.2065	0	61.8974	101.851	0
YPI1	80.0566	114.568	108.102	0	0	68.968	80.8679	73.0699	93.0163	0	89.4073	16.4275	0
BET5	79.3222	62.469	58.5244	0	0	58.7505	80.8679	73.0699	95.3417	44.9458	75.6523	85.4232	0
CLN2	79.3222	58.5184	62.9976	0	94.5537	81.7398	74.6473	83.5085	39.5319	0	34.3874	65.7101	32.4644
CSR1	79.3222	52.8394	57.0334	33.2502	0	56.1961	49.7649	62.6314	90.6909	89.8917	41.2649	42.7116	48.6966
CYT1	79.3222	164.938	156.562	0	189.107	66.4136	37.3236	76.5494	162.779	89.8917	220.08	45.9971	0
DCP1	79.3222	76.0492	74.5534	0	0	58.7505	43.5443	0	51.159	44.9458	171.937	75.5667	48.6966
DFM1	79.3222	60.9875	63.3704	0	0	61.3049	55.9855	41.7542	41.8574	89.8917	41.2649	36.1406	0
EFR3	79.3222	61.9752	74.5534	99.7506	94.5537	71.5224	80.8679	100.906	62.786	0	48.1424	72.2812	16.2322
HMG1	79.3222	42.2221	46.2231	33.2502	0	84.2942	93.3091	52.1928	55.8098	89.8917	34.3874	65.7101	81.1609
KTR7	79.3222	64.4443	69.7075	66.5004	94.5537	89.4029	68.4267	100.906	67.4368	44.9458	61.8974	82.1377	32.4644
LAP3	79.3222	114.321	111.83	0	0	97.0661	68.4267	90.4675	60.4606	44.9458	55.0199	45.9971	48.6966
MAK21	79.3222	65.185	57.4061	199.501	94.5537	74.0767	62.2061	111.345	53.4844	0	48.1424	160.99	194.786
NOP14	79.3222	53.827	55.1695	99.7506	0	74.0767	74.6473	73.0699	74.4131	89.8917	41.2649	105.136	16.2322
POL5	79.3222	48.395	46.2231	66.5004	0	89.4029	37.3236	55.6723	20.9287	0	20.6325	78.8522	81.1609
PRS4	79.3222	67.4073	66.3525	66.5004	94.5537	86.8486	37.3236	73.0699	34.8811	89.8917	27.5099	98.5652	16.2322
PYC2	79.3222	138.518	159.172	133.001	283.661	127.718	130.633	104.386	130.223	134.838	68.7748	85.4232	81.1609
RRS1	79.3222	72.0986	90.5824	0	94.5537	81.7398	55.9855	83.5085	79.0639	0	96.2848	246.413	16.2322
RTC6	79.3222	79.506	89.4641	0	0	63.8592	80.8679	59.1518	76.7385	134.838	68.7748	39.4261	32.4644
SEC31	79.3222	37.7777	40.6316	0	94.5537	53.6418	43.5443	62.6314	69.7623	44.9458	61.8974	85.4232	81.1609
SRD1	79.3222	58.2715	57.4061	0	0	76.6311	93.3091	80.0289	44.1828	0	34.3874	22.9986	32.4644
VPS4	79.3222	81.7282	74.1807	0	0	91.9573	62.2061	125.263	102.318	0	75.6523	55.8536	0
YAH1	79.3222	46.9135	49.578	0	0	56.1961	49.7649	20.8771	60.4606	89.8917	75.6523	68.9957	32.4644
AST1	78.5877	50.6172	47.7142	133.001	94.5537	71.5224	87.0885	55.6723	30.2303	44.9458	48.1424	45.9971	16.2322
HRK1	78.5877	52.3456	77.5356	0	0	91.9573	93.3091	114.824	99.9926	44.9458	110.04	39.4261	64.9287
IES6	78.5877	63.7036	84.2454	166.251	0	58.7505	55.9855	45.2338	51.159	89.8917	116.917	95.2797	0
IMG1	78.5877	70.6171	61.1338	33.2502	0	63.8592	111.971	48.7133	37.2065	179.783	82.5298	45.9971	0
MHF2	78.5877	66.6665	65.9798	33.2502	0	76.6311	62.2061	45.2338	34.8811	44.9458	13.755	59.1391	0
NAB2	78.5877	66.4196	73.8079	33.2502	0	56.1961	62.2061	83.5085	67.4368	89.8917	144.427	121.564	48.6966
NDI1	78.5877	71.8517	74.1807	0	94.5537	61.3049	43.5443	48.7133	88.3655	224.729	68.7748	29.5696	16.2322
QRI5	78.5877	89.1356	90.2096	0	94.5537	43.4243	87.0885	59.1518	39.5319	44.9458	27.5099	36.1406	0
SNF11	78.5877	70.864	72.3168	0	94.5537	33.2068	130.633	55.6723	55.8098	0	68.7748	13.142	0
SRB7	78.5877	75.3085	70.0802	0	0	51.0874	55.9855	31.3157	25.5795	0	27.5099	75.5667	0
TMH18	78.5877	146.666	144.634	33.2502	94.5537	66.4136	55.9855	55.6723	102.318	134.838	82.5298	52.5681	16.2322
YME1	78.5877	73.827	67.4708	0	0	91.9573	80.8679	83.5085	39.5319	89.8917	61.8974	36.1406	97.3931
ALG5	77.8532	77.0369	71.5713	33.2502	94.5537	68.968	143.074	69.5904	79.0639	0	48.1424	98.5652	48.6966
APL6	77.8532	64.4443	61.1338	0	189.107	63.8592	55.9855	135.701	32.5557	0	20.6325	36.1406	32.4644
EBP2	77.8532	105.679	111.457	99.7506	0	56.1961	80.8679	97.4265	97.6672	89.8917	68.7748	187.274	64.9287
ERP6	77.8532	98.0245	94.6828	0	0	86.8486	68.4267	80.0289	51.159	89.8917	48.1424	55.8536	0
GAL83	77.8532	66.4196	76.4173	66.5004	0	58.7505	37.3236	80.0289	44.1828	0	34.3874	39.4261	16.2322
GPI11	77.8532	65.9258	54.7968	133.001	0	68.968	80.8679	52.1928	72.0877	89.8917	75.6523	134.706	0
GTR1	77.8532	57.7776	58.8972	66.5004	94.5537	45.9787	31.103	66.1109	44.1828	0	55.0199	68.9957	0
MRPL20	77.8532	94.3208	95.0556	66.5004	0	84.2942	62.2061	59.1518	79.0639	89.8917	27.5099	49.2826	64.9287
MRPL22	77.8532	83.4566	83.8726	66.5004	0	48.533	55.9855	90.4675	58.1352	44.9458	82.5298	36.1406	16.2322
REH1	77.8532	59.0122	62.6249	166.251	94.5537	74.0767	80.8679	73.0699	46.5082	44.9458	55.0199	68.9957	0
RSC6	77.8532	46.4196	42.8682	0	94.5537	63.8592	49.7649	76.5494	30.2303	0	13.755	68.9957	0
SAS10	77.8532	62.7159	62.9976	133.001	0	76.6311	93.3091	62.6314	76.7385	44.9458	137.55	128.135	64.9287
SEY1	77.8532	70.6171	69.3347	33.2502	94.5537	74.0767	80.8679	52.1928	55.8098	134.838	75.6523	75.5667	32.4644
SIT4	77.8532	57.2838	57.4061	0	0	68.968	62.2061	93.947	53.4844	89.8917	68.7748	75.5667	0
SMD1	77.8532	79.7529	88.7186	66.5004	0	51.0874	62.2061	55.6723	62.786	0	34.3874	45.9971	16.2322
SYM1	77.8532	59.9999	57.4061	66.5004	0	51.0874	49.7649	55.6723	55.8098	44.9458	41.2649	13.142	0
TAN1	77.8532	76.543	71.1985	0	94.5537	84.2942	87.0885	83.5085	58.1352	89.8917	20.6325	91.9942	0
TGL4	77.8532	65.9258	66.7253	0	94.5537	63.8592	62.2061	80.0289	34.8811	89.8917	34.3874	36.1406	32.4644
YPC1	77.8532	46.6666	59.27	0	0	86.8486	74.6473	66.1109	67.4368	0	27.5099	13.142	0
APL4	77.1188	57.2838	59.6427	0	0	63.8592	55.9855	59.1518	53.4844	0	55.0199	26.2841	48.6966
ATG5	77.1188	40.7407	29.8214	66.5004	0	43.4243	74.6473	80.0289	9.30163	44.9458	20.6325	32.8551	64.9287
BXI1	77.1188	82.7159	74.9262	0	0	112.392	93.3091	83.5085	58.1352	44.9458	34.3874	32.8551	16.2322
COX15	77.1188	98.2714	111.457	0	283.661	127.718	37.3236	45.2338	134.874	269.675	206.325	29.5696	48.6966
GCN1	77.1188	51.6048	57.0334	33.2502	189.107	158.371	111.971	139.181	88.3655	89.8917	48.1424	95.2797	535.662
GGC1	77.1188	196.79	168.118	33.2502	0	61.3049	80.8679	66.1109	130.223	44.9458	130.672	52.5681	32.4644
GTS1	77.1188	60.4937	58.8972	0	0	76.6311	55.9855	69.5904	55.8098	0	68.7748	22.9986	32.4644
MRPS9	77.1188	98.0245	103.629	0	94.5537	66.4136	93.3091	125.263	76.7385	134.838	103.162	72.2812	48.6966
PIM1	77.1188	51.6048	59.6427	0	0	68.968	62.2061	80.0289	39.5319	44.9458	61.8974	65.7101	113.625
PMR1	77.1188	54.8147	62.6249	66.5004	94.5537	135.382	136.853	125.263	109.294	44.9458	82.5298	39.4261	178.554
RPA14	77.1188	66.6665	62.2521	0	0	71.5224	87.0885	55.6723	48.8336	0	55.0199	111.707	81.1609
RPN4	77.1188	52.5925	55.5423	0	0	38.3155	49.7649	66.1109	41.8574	134.838	48.1424	62.4246	16.2322
SMX2	77.1188	63.9505	65.607	0	0	61.3049	74.6473	45.2338	67.4368	0	55.0199	45.9971	0
SSD1	77.1188	61.7283	69.7075	33.2502	94.5537	45.9787	105.75	80.0289	65.1114	44.9458	89.4073	22.9986	178.554
TAF4	77.1188	45.6789	55.1695	0	0	61.3049	37.3236	86.988	51.159	44.9458	48.1424	85.4232	16.2322
UBX2	77.1188	56.5431	59.6427	0	0	102.175	68.4267	69.5904	20.9287	44.9458	34.3874	88.7087	16.2322
UTP10	77.1188	27.6543	34.2946	99.7506	0	117.501	74.6473	139.181	46.5082	179.783	48.1424	114.993	324.644
UTP8	77.1188	50.3703	58.8972	0	0	89.4029	87.0885	73.0699	32.5557	44.9458	48.1424	91.9942	32.4644
DOG2	76.3843	121.234	116.676	66.5004	283.661	53.6418	68.4267	93.947	81.3893	44.9458	20.6325	26.2841	0
GCD2	76.3843	53.5801	56.6606	66.5004	0	76.6311	99.5297	59.1518	41.8574	0	20.6325	95.2797	64.9287
GLC8	76.3843	128.148	109.966	0	0	58.7505	136.853	83.5085	111.62	134.838	75.6523	82.1377	16.2322
KTI12	76.3843	60.2468	59.27	0	94.5537	104.729	99.5297	59.1518	39.5319	44.9458	27.5099	68.9957	0
OCA1	76.3843	59.506	69.3347	33.2502	0	53.6418	49.7649	73.0699	37.2065	89.8917	61.8974	45.9971	0
OPT1	76.3843	85.4319	84.2454	166.251	0	76.6311	55.9855	62.6314	125.572	269.675	130.672	82.1377	32.4644
PMT4	76.3843	67.1603	76.4173	332.502	189.107	324.405	192.839	358.391	213.938	269.675	130.672	114.993	113.625
RFC5	76.3843	57.0369	49.9508	133.001	189.107	63.8592	68.4267	97.4265	37.2065	0	48.1424	52.5681	0
RSM10	76.3843	92.8393	84.9909	33.2502	0	45.9787	99.5297	80.0289	111.62	269.675	116.917	59.1391	0
SDH8	76.3843	89.3825	98.0378	0	0	40.8699	68.4267	48.7133	55.8098	44.9458	89.4073	42.7116	16.2322
SNC1	76.3843	88.8887	88.7186	0	94.5537	63.8592	105.75	45.2338	74.4131	224.729	34.3874	45.9971	0
COT1	75.6499	49.6295	59.27	66.5004	0	51.0874	68.4267	48.7133	67.4368	44.9458	55.0199	39.4261	16.2322
DNF2	75.6499	35.8024	45.8504	33.2502	0	102.175	124.412	132.222	32.5557	0	55.0199	22.9986	81.1609
DPH2	75.6499	38.5184	39.1405	66.5004	0	79.1855	68.4267	41.7542	30.2303	89.8917	55.0199	147.848	48.6966
ERB1	75.6499	39.753	40.6316	0	0	94.5117	80.8679	100.906	27.9049	0	13.755	114.993	32.4644
ERJ5	75.6499	74.8146	67.8436	66.5004	0	81.7398	55.9855	69.5904	72.0877	0	55.0199	65.7101	16.2322
EUG1	75.6499	63.4566	61.1338	33.2502	0	81.7398	74.6473	59.1518	44.1828	44.9458	27.5099	45.9971	16.2322
MRPL36	75.6499	100.247	98.0378	33.2502	94.5537	48.533	149.295	45.2338	62.786	44.9458	55.0199	85.4232	32.4644
PTR2	75.6499	74.3208	83.1271	66.5004	94.5537	122.61	80.8679	97.4265	158.128	179.783	247.589	19.713	162.322
SIT1	75.6499	21.9753	27.9575	99.7506	0	38.3155	49.7649	73.0699	9.30163	0	13.755	62.4246	32.4644
[truncated: 3,795 more rows]
