# Supplementary material
Source: HighWire-hosted journal article supplement (doi:10.1101/rna.078898.121)
Supplement: Supplemental_TableS3_Median_TailLengths.xlsx [file Supplemental_TableS3_Median_TailLengths.xlsx]

## Sheet: PolyAPolyI_1
Feature name	Feature type	Feature length	Feature median tail length	number of reads	RPM
tRNA-Phe	tRNA	804	43.67	5	11.1266
tK_28UUU_29P	tRNA	73	47.19	5	11.1266
tV_28AAC_29O	tRNA	73	56.835	4	8.90127
tP_28UGG_29O1	tRNA	72	66.86	4	8.90127
tE_28UUC_29E2	tRNA	71	66.5	3	6.67595
tK_28CUU_29C	tRNA	72	68.65	3	6.67595
tD_28GUC_29N	tRNA	70	72.53	3	6.67595
tT_28AGU_29I1	tRNA	72	80.39	2	4.45064
tV_28CAC_29D	tRNA	72	58.85	2	4.45064
tA_28AGC_29L	tRNA	72	89.415	2	4.45064
tL_28UAG_29L1	tRNA	82	45.385	2	4.45064
tV_28AAC_29G3	tRNA	73	134.1	2	4.45064
tL_28CAA_29L	tRNA	82	52.72	2	4.45064
tL_28UAA_29B2	tRNA	83	33.84	2	4.45064
tQ_28UUG_29E2	tRNA	71	36.705	2	4.45064
tL_28UAG_29L2	tRNA	82	30.29	1	2.22532
tT_28AGU_29N2	tRNA	72	55.45	1	2.22532
IMT4	tRNA	71	84.84	1	2.22532
tP_28UGG_29L	tRNA	72	63.42	1	2.22532
tS_28GCU_29F	tRNA	82	44.66	1	2.22532
tD_28GUC_29I2	tRNA	71	55.92	1	2.22532
tD_28GUC_29I1	tRNA	71	33.76	1	2.22532
tQ_28UUG_29B	tRNA	71	22.57	1	2.22532
tH_28GUG_29M	tRNA	71	59.59	1	2.22532
tA_28UGC_29O	tRNA	72	31.54	1	2.22532
tG_28GCC_29D2	tRNA	70	31.33	1	2.22532
tE_28UUC_29J	tRNA	71	70.7	1	2.22532
tE_28UUC_29C	tRNA	71	47.35	1	2.22532
tN_28GUU_29P	tRNA	73	48.97	1	2.22532
tH_28GUG_29E2	tRNA	71	38.28	1	2.22532
SOE1	tRNA	71	71.74	1	2.22532
tN_28GUU_29L	tRNA	73	41.96	1	2.22532
tP_28UGG_29N2	tRNA	72	68.12	1	2.22532
tI_28AAU_29N2	tRNA	73	64.64	1	2.22532
tI_28AAU_29G	tRNA	73	27.87	1	2.22532
tD_28GUC_29D	tRNA	71	23.48	1	2.22532
SUF9	tRNA	72	113.87	1	2.22532
SUF4	tRNA	71	34.54	1	2.22532
tA_28AGC_29G	tRNA	72	39.58	1	2.22532
gag-pol_20fusion_20protein	transposable_element	217730	38.57	1585	3527.13
gag_20protein	transposable_element	53095	43.43	182	405.008
YOR343C-B	transposable_element	5313	49.405	84	186.927
YARCTyA1-1	transposable_element	1322	38.48	1	2.22532
YDR210W-C	transposable_element	1322	29.63	1	2.22532
TLC1	telomerase_RNA	1300	75.565	26	57.8583
LSR1	snRNA	1174	47.61	19	42.281
SNR19	snRNA	567	169.56	17	37.8304
SNR14	snRNA	159	78.55	1	2.22532
SNR24	snoRNA	88	34.33	750	1668.99
SNR44	snoRNA	210	50.725	382	850.071
SNR18	snoRNA	101	39.72	382	850.071
SNR39	snoRNA	88	40.295	382	850.071
SNR59	snoRNA	77	40.16	232	516.274
SNR38	snoRNA	94	40	193	429.486
SNR43	snoRNA	208	46.305	44	97.914
SNR84	snoRNA	549	66.555	32	71.2102
SNR191	snoRNA	273	58.33	29	64.5342
SNR9	snoRNA	186	47.96	17	37.8304
SNR63	snoRNA	254	49.93	17	37.8304
SNR86	snoRNA	1003	63.425	16	35.6051
SNR33	snoRNA	182	52.26	14	31.1545
SNR42	snoRNA	350	68.6	11	24.4785
SNR49	snoRNA	164	47.15	10	22.2532
SNR8	snoRNA	189	54.675	10	22.2532
SNR4	snoRNA	185	47.925	10	22.2532
SNR82	snoRNA	267	76.395	8	17.8025
SNR75	snoRNA	88	67	7	15.5772
SNR68	snoRNA	135	50.39	7	15.5772
SNR10	snoRNA	244	53.43	7	15.5772
SNR11	snoRNA	257	82.74	7	15.5772
SNR41	snoRNA	94	58.955	6	13.3519
SNR37	snoRNA	385	74.61	5	11.1266
SNR190	snoRNA	189	127.71	4	8.90127
SNR65	snoRNA	99	104.82	4	8.90127
SNR17B	snoRNA	332	54.63	4	8.90127
SNR30	snoRNA	605	55.98	4	8.90127
SNR70	snoRNA	163	46	4	8.90127
SNR57	snoRNA	87	58.57	3	6.67595
SNR83	snoRNA	305	88.3	3	6.67595
SNR36	snoRNA	181	44.76	3	6.67595
SNR35	snoRNA	203	90.74	3	6.67595
SNR39B	snoRNA	95	64.27	3	6.67595
SNR62	snoRNA	99	58.995	2	4.45064
SNR47	snoRNA	98	146.65	2	4.45064
SNR40	snoRNA	96	73.71	2	4.45064
SNR69	snoRNA	100	71.34	2	4.45064
SNR61	snoRNA	89	63.145	2	4.45064
SNR32	snoRNA	187	37.245	2	4.45064
SNR31	snoRNA	224	45.225	2	4.45064
SNR5	snoRNA	203	193.61	1	2.22532
SNR80	snoRNA	170	310.78	1	2.22532
SNR74	snoRNA	87	60.62	1	2.22532
NME1	snoRNA	339	42.21	1	2.22532
SNR66	snoRNA	85	42.87	1	2.22532
SNR56	snoRNA	87	44.52	1	2.22532
SNR48	snoRNA	112	65.26	1	2.22532
SNR60	snoRNA	103	33.68	1	2.22532
SNR77	snoRNA	87	125.78	1	2.22532
RDN18-2	rRNA	1799	28.12	92888	206705
RDN25-2	rRNA	3395	34.92	45500	101252
RDN58-2	rRNA	157	71.31	576	1281.78
ETS1-2	rRNA	699	24.83	197	438.388
ITS1-2	rRNA	0	43.16	49	109.041
NTS2-2	rRNA	1242	32.935	26	57.8583
ITS2-2	rRNA	0	88.16	16	35.6051
NTS2-1	rRNA	1242	40.04	11	24.4785
RDN5-2	rRNA	118	36.25	6	13.3519
NTS1-2	rRNA	914	52.34	4	8.90127
RDN37-2	rRNA	6266	97.695	2	4.45064
RUF20	ncRNA	442	42.815	86	191.377
RUF21	ncRNA	706	40.325	66	146.871
SCR1	ncRNA	521	112.95	13	28.9291
SRG1	ncRNA	550	63.55	5	11.1266
RUF5-2	ncRNA	709	63.84	5	11.1266
IRT1	ncRNA	1488	45.5	3	6.67595
RME2	ncRNA	2222	48.695	2	4.45064
RUF23	ncRNA	253	55.9	1	2.22532
RME3	ncRNA	1904	68.59	1	2.22532
YLR162W	mRNA	356	47.76	10338	23005.3
TEF1	mRNA	1376	47.11	6093	13558.9
TDH2	mRNA	998	43.88	5420	12061.2
FBA1	mRNA	1079	43.67	5067	11275.7
ENO2	mRNA	1313	43.39	4508	10031.7
ADH1	mRNA	1046	44.365	4194	9332.98
PDC1	mRNA	1691	43.04	3256	7245.64
RPS12	mRNA	431	45.06	3133	6971.92
PGK1	mRNA	1250	44.8	2713	6037.29
TDH3	mRNA	998	42.775	2660	5919.35
RPS31	mRNA	458	35.09	2657	5912.67
CDC19	mRNA	1502	40.8	2425	5396.4
GPM1	mRNA	743	40.695	2190	4873.45
CCW12	mRNA	401	49.945	2180	4851.19
TPI1	mRNA	746	41.35	2115	4706.55
RPL25	mRNA	429	49.54	1973	4390.55
RPS8B	mRNA	610	42.11	1870	4161.34
RPS5	mRNA	677	42.365	1748	3889.86
RPS6A	mRNA	711	48.5	1723	3834.22
RPS25A	mRNA	342	55.93	1717	3820.87
RPL28	mRNA	450	35.22	1606	3573.86
CWP2	mRNA	278	58.065	1570	3493.75
RPL23B	mRNA	414	54.13	1485	3304.6
HOR7	mRNA	179	54.79	1330	2959.67
RPS23B	mRNA	438	36.37	1308	2910.72
RPL36B	mRNA	303	39.18	1291	2872.89
RPL26B	mRNA	384	38.44	1246	2772.75
RPL10	mRNA	665	39.255	1224	2723.79
ENO1	mRNA	1313	45	1223	2721.56
RPS24A	mRNA	408	45.46	1221	2717.11
RPL1A	mRNA	653	43.96	1213	2699.31
RPS4A	mRNA	786	36.7	1209	2690.41
TMA19	mRNA	503	43.17	1207	2685.96
RPS1B	mRNA	767	38.325	1194	2657.03
RPS2	mRNA	764	39.85	1180	2625.88
RPL18A	mRNA	561	44.34	1128	2510.16
RPS28A	mRNA	203	39.445	1092	2430.05
RPS30A	mRNA	192	41.61	1075	2392.22
RPS23A	mRNA	438	43.12	1067	2374.41
RPL33A	mRNA	324	48.78	1020	2269.82
RPS10A	mRNA	318	49.65	1010	2247.57
RPS3	mRNA	722	39.3	979	2178.59
RPL31A	mRNA	342	37	958	2131.85
RPL32	mRNA	393	39.955	952	2118.5
HHT2	mRNA	410	41.38	950	2114.05
RPS13	mRNA	456	38.67	941	2094.02
RPL40A	mRNA	387	39.335	938	2087.35
RPS21A	mRNA	264	48.76	937	2085.12
RPS15	mRNA	428	52.295	932	2074
RPL35B	mRNA	363	40.055	924	2056.19
RPS17A	mRNA	411	39.44	922	2051.74
RPL2A	mRNA	765	41.61	921	2049.52
RPS17B	mRNA	411	45.97	919	2045.07
RPL42A	mRNA	321	37.655	910	2025.04
RPP1B	mRNA	321	40.35	908	2020.59
RPS20	mRNA	365	35.32	907	2018.36
RPP0	mRNA	938	38.94	901	2005.01
GLN1	mRNA	1112	50.915	898	1998.34
RPS1A	mRNA	767	47.22	897	1996.11
RPL21A	mRNA	483	45.85	893	1987.21
RPL2B	mRNA	765	54.76	891	1982.76
RPS16A	mRNA	432	40.96	886	1971.63
RPL21B	mRNA	483	44.77	879	1956.05
RPS18B	mRNA	441	44.48	879	1956.05
RPL14A	mRNA	417	35.04	877	1951.6
RPL12B	mRNA	497	36.575	874	1944.93
RPL15A	mRNA	614	44.19	850	1891.52
RPL40B	mRNA	387	41.255	846	1882.62
RPL27A	mRNA	411	34.68	838	1864.82
RPL20B	mRNA	519	40.17	833	1853.69
TSA1	mRNA	590	48.965	824	1833.66
RPL11A	mRNA	524	35.88	813	1809.18
HXT6	mRNA	1712	58.715	808	1798.06
RPL41A	mRNA	77	43.04	807	1795.83
BMH1	mRNA	803	34.38	797	1773.58
RPS30B	mRNA	192	54.83	781	1737.97
RPS26A	mRNA	370	33.65	775	1724.62
RPL37B	mRNA	267	38.735	772	1717.95
RPS22A	mRNA	392	39.43	750	1668.99
RPL38	mRNA	236	36.265	746	1660.09
RPL24A	mRNA	475	42.52	738	1642.28
RPL37A	mRNA	267	41.545	722	1606.68
RPS18A	mRNA	441	36.75	708	1575.53
RPL3	mRNA	1163	38.57	706	1571.07
RPS21B	mRNA	264	30.43	688	1531.02
SSB2	mRNA	1841	37.06	688	1531.02
RPS9B	mRNA	588	32.33	683	1519.89
RPS0A	mRNA	759	47.55	681	1515.44
SED1	mRNA	1016	62.755	680	1513.22
RPL5	mRNA	893	40.04	663	1475.39
RPS19A	mRNA	435	41.48	662	1473.16
RPS16B	mRNA	432	38.85	646	1437.56
RPL24B	mRNA	475	34.77	646	1437.56
ZEO1	mRNA	341	65.71	635	1413.08
RPL42B	mRNA	321	40.38	627	1395.27
RPL23A	mRNA	414	40.91	627	1395.27
RPS27B	mRNA	249	38.23	617	1373.02
TIF1	mRNA	1187	46.91	617	1373.02
CUP1-2	mRNA	185	56.28	616	1370.8
YEF3	mRNA	3134	45.115	614	1366.35
ACT1	mRNA	1128	39.66	610	1357.44
PMA1	mRNA	2756	58.82	603	1341.87
STM1	mRNA	821	39.2	590	1312.94
RPL34B	mRNA	366	33.45	589	1310.71
GPP1	mRNA	752	43.48	589	1310.71
PSA1	mRNA	1085	50.5	589	1310.71
PMP2	mRNA	131	61.345	586	1304.04
HTA2	mRNA	398	39.17	579	1288.46
RPL43A	mRNA	279	32.46	572	1272.88
RPL8B	mRNA	770	39.215	568	1263.98
RPS19B	mRNA	435	39.29	565	1257.3
RPL20A	mRNA	519	38.74	562	1250.63
EFT1	mRNA	2528	45.9	560	1246.18
RPL12A	mRNA	497	42.79	553	1230.6
VMA3	mRNA	482	50.1	546	1215.02
HXT4	mRNA	1730	49.245	544	1210.57
EGD1	mRNA	473	52.57	544	1210.57
HSP150	mRNA	1241	63.5	541	1203.9
RPL19B	mRNA	570	36.25	539	1199.45
RPL43B	mRNA	279	39.25	539	1199.45
CPR1	mRNA	488	38.215	536	1192.77
RPL30	mRNA	318	35.96	534	1188.32
MRH1	mRNA	962	66.91	533	1186.09
RPL16B	mRNA	597	38.13	525	1168.29
RPS26B	mRNA	360	41.41	511	1137.14
PGI1	mRNA	1664	42	509	1132.69
RPS7A	mRNA	573	36.765	502	1117.11
RPP2A	mRNA	320	37.19	493	1097.08
HHT1	mRNA	410	52.82	491	1092.63
GCN4	mRNA	845	58.83	487	1083.73
PHO84	mRNA	1763	55.17	479	1065.93
HTA1	mRNA	398	48.26	477	1061.48
RPL16A	mRNA	600	43.1	477	1061.48
PMP3	mRNA	167	60.75	472	1050.35
RPL17A	mRNA	555	38.26	470	1045.9
RPS14A	mRNA	414	36.46	467	1039.22
EGD2	mRNA	524	39.83	467	1039.22
RPL6A	mRNA	531	39.26	466	1037
RPS0B	mRNA	759	41.35	460	1023.65
RPL17B	mRNA	555	41.06	454	1010.29
HHF1	mRNA	311	62.17	451	1003.62
RPL4B	mRNA	1088	47.04	451	1003.62
SOD1	mRNA	464	38.07	449	999.168
AHP1	mRNA	530	37.22	449	999.168
RPL14B	mRNA	417	51.925	438	974.689
RPL34A	mRNA	366	34.895	432	961.337
RPL9A	mRNA	575	35	429	954.661
HXK2	mRNA	1460	54.465	428	952.436
RPS10B	mRNA	318	42.86	423	941.309
RPS29B	mRNA	183	41.935	420	934.634
RPL22A	mRNA	366	38.52	418	930.183
BAT1	mRNA	1181	46.465	418	930.183
RPL13B	mRNA	600	36.17	415	923.507
RPS25B	mRNA	340	38.83	411	914.606
GIS2	mRNA	461	42.77	407	905.704
SSA2	mRNA	1919	38.9	404	899.028
GAS1	mRNA	1679	47.98	404	899.028
BGL2	mRNA	941	56.005	402	894.578
RPL33B	mRNA	324	52.965	392	872.325
HXK1	mRNA	1457	48.43	392	872.325
RPL29	mRNA	183	35.49	384	854.522
RPS11A	mRNA	471	33.475	378	841.17
ECM33	mRNA	1290	54.78	369	821.142
RPL13A	mRNA	600	41.42	369	821.142
MMF1	mRNA	437	42.55	367	816.692
HTB1	mRNA	395	50.535	366	814.466
TDH1	mRNA	998	49.3	364	810.016
RPL41B	mRNA	77	44.31	361	803.34
EGO4	mRNA	296	47	359	798.889
NKP1	mRNA	716	41.59	356	792.213
SUI1	mRNA	326	47.26	351	781.087
ADK1	mRNA	668	45.5	349	776.636
PMP1	mRNA	122	55.545	346	769.96
RPL27B	mRNA	411	42.22	343	763.284
RPP2B	mRNA	332	34.24	340	756.608
TRX2	mRNA	314	45.79	339	754.383
TIP1	mRNA	632	65.46	321	714.327
RPP1A	mRNA	320	36.12	320	712.102
RPL6B	mRNA	531	44	316	703.2
STF2	mRNA	254	47.59	313	696.524
COF1	mRNA	432	36.02	312	694.299
GSP1	mRNA	659	36.82	310	689.849
ARF1	mRNA	545	36.62	304	676.497
OLE1	mRNA	1532	58.52	301	669.821
FPR1	mRNA	344	42.9	301	669.821
SEC53	mRNA	764	58.48	297	660.919
ACB1	mRNA	263	40	296	658.694
CIS3	mRNA	683	50.5	293	652.018
RPL39	mRNA	156	44.195	290	645.342
RPS27A	mRNA	249	42.81	288	640.892
RPS11B	mRNA	471	36.67	284	631.99
NCE102	mRNA	521	58.74	283	629.765
HSC82	mRNA	2117	39.06	280	623.089
VTC1	mRNA	389	40.48	277	616.413
RPL8A	mRNA	770	39.985	276	614.188
EMI2	mRNA	1502	50.42	275	611.962
UTH1	mRNA	1097	63.55	274	609.737
ILV5	mRNA	1187	62.775	274	609.737
HYP2	mRNA	473	49.32	269	598.611
RPL26A	mRNA	384	36.265	266	591.935
ADE13	mRNA	1448	43.47	266	591.935
RPL19A	mRNA	570	36.48	265	589.709
RPS29A	mRNA	176	36.39	262	583.033
SRL1	mRNA	632	63.3	254	565.231
SBA1	mRNA	650	41.61	250	556.329
PFY1	mRNA	381	45.76	248	551.879
YNL190W	mRNA	614	61.96	247	549.654
RPL11B	mRNA	524	34.54	244	542.978
ATP2	mRNA	1535	42.5	243	540.752
RPS7B	mRNA	573	42.3	239	531.851
YNL208W	mRNA	599	49.03	237	527.4
POR1	mRNA	851	48.23	236	525.175
HXT2	mRNA	1625	57.655	236	525.175
PET9	mRNA	956	51.77	233	518.499
RPL35A	mRNA	363	41.38	229	509.598
SUP45	mRNA	1313	37.135	226	502.922
CTS1	mRNA	1688	66.48	225	500.697
PDI1	mRNA	1568	37.31	224	498.471
GLK1	mRNA	1502	43.13	224	498.471
PHO5	mRNA	1403	45.18	223	496.246
NPL3	mRNA	1244	45.64	222	494.021
PHO12	mRNA	1403	50.46	220	489.57
RPS28B	mRNA	203	41.94	218	485.119
HSP104	mRNA	2726	47.53	213	473.993
KTR5	mRNA	1568	47.325	212	471.767
NOP10	mRNA	176	41.695	208	462.866
CDC33	mRNA	641	41.74	207	460.641
CCW14	mRNA	716	52.83	205	456.19
APE3	mRNA	1613	39.2	204	453.965
FCY1	mRNA	476	43.22	203	451.74
TMA7	mRNA	194	39.79	202	449.514
ADH3	mRNA	1127	37.16	201	447.289
PEP4	mRNA	1217	46.3	201	447.289
TRX1	mRNA	311	39.455	200	445.064
SUB2	mRNA	1340	55	199	442.838
URA1	mRNA	944	40.13	197	438.388
MBF1	mRNA	455	52.09	195	433.937
HOM2	mRNA	1097	41.57	195	433.937
VOA1	mRNA	797	49.64	193	429.486
TIF3	mRNA	1310	42.64	193	429.486
ILV3	mRNA	1757	39.04	193	429.486
TOS1	mRNA	1367	59.59	192	427.261
SAH1	mRNA	1349	47.145	192	427.261
EXG1	mRNA	1346	50.19	187	416.134
SNU13	mRNA	380	43.37	186	413.909
HHF2	mRNA	311	43.73	182	405.008
ASP3-4	mRNA	1088	43.61	181	402.783
NHP2	mRNA	470	44.3	181	402.783
RPL31B	mRNA	342	40.26	180	400.557
CYS4	mRNA	1523	46.96	179	398.332
TKL1	mRNA	2042	43.21	178	396.107
SSE1	mRNA	2081	40.245	176	391.656
ARO4	mRNA	1112	43.15	175	389.431
GND1	mRNA	1469	41.38	174	387.205
HTB2	mRNA	395	47.38	173	384.98
HXT3	mRNA	1703	41.26	173	384.98
RPS24B	mRNA	408	39.22	173	384.98
YRB1	mRNA	605	41.37	171	380.529
TIM10	mRNA	281	45.25	169	376.079
YER010C	mRNA	704	42.3	169	376.079
PAB1	mRNA	1733	53.09	169	376.079
SSS1	mRNA	242	40.59	169	376.079
ERG2	mRNA	668	49.36	168	373.853
ADO1	mRNA	1022	43.365	168	373.853
OLA1	mRNA	1184	37	165	367.177
SCW4	mRNA	1160	59.84	165	367.177
NOP1	mRNA	983	37.93	164	364.952
ERG11	mRNA	1592	57.85	163	362.727
SUI3	mRNA	857	44.145	162	360.501
SGT2	mRNA	1040	43.75	161	358.276
ADE12	mRNA	1301	42.76	160	356.051
SCW10	mRNA	1169	55.62	158	351.6
SBP1	mRNA	884	36.15	157	349.375
SDT1	mRNA	842	57.435	156	347.15
PRC1	mRNA	1598	54.545	156	347.15
VMA11	mRNA	494	41.76	156	347.15
GPD1	mRNA	1175	41.88	155	344.924
EFB1	mRNA	621	40.96	155	344.924
HEM13	mRNA	986	54.75	153	340.474
GAR1	mRNA	617	42.38	152	338.248
PNC1	mRNA	650	41.77	150	333.798
TIF11	mRNA	461	40.005	150	333.798
RTN1	mRNA	887	50.1	149	331.572
PIL1	mRNA	1019	53.88	149	331.572
TAL1	mRNA	1007	43.015	148	329.347
KRS1	mRNA	1775	34.96	147	327.122
YRO2	mRNA	1034	51.54	147	327.122
ASC1	mRNA	960	36.72	147	327.122
RPL7B	mRNA	736	38.565	146	324.896
PFK1	mRNA	2963	45.43	144	320.446
NOP56	mRNA	1514	41.47	144	320.446
LSP1	mRNA	1025	47.415	144	320.446
RPL9B	mRNA	575	40.13	143	318.22
UGP1	mRNA	1499	48.705	142	315.995
ATP18	mRNA	179	41.33	141	313.77
MFA2	mRNA	116	90.46	141	313.77
RPL36A	mRNA	303	30.725	140	311.545
GRS1	mRNA	2003	40.02	140	311.545
MET6	mRNA	2303	58.04	139	309.319
GRX2	mRNA	431	59.45	139	309.319
ATP1	mRNA	1637	46.44	139	309.319
PDA1	mRNA	1262	42.6	139	309.319
RNR4	mRNA	1037	42.67	139	309.319
TEF4	mRNA	1239	38.54	139	309.319
ADE17	mRNA	1778	44.825	138	307.094
TIF5	mRNA	1217	41.3	137	304.869
ARC1	mRNA	1130	37.54	136	302.643
OYE2	mRNA	1202	41.385	134	298.193
THS1	mRNA	2204	36.83	133	295.967
MIC26	mRNA	701	43.24	133	295.967
KAR2	mRNA	2048	41.52	133	295.967
SSC1	mRNA	1964	48.62	131	291.517
SHM2	mRNA	1409	47.28	131	291.517
URA5	mRNA	680	44.455	130	289.291
BMH2	mRNA	905	42.35	129	287.066
DSE2	mRNA	977	81.235	128	284.841
DED81	mRNA	1664	37.945	128	284.841
COX4	mRNA	480	51.205	128	284.841
ERG3	mRNA	1097	49.2	127	282.615
PIR1	mRNA	1025	61.04	127	282.615
IPP1	mRNA	863	43.68	127	282.615
STE2	mRNA	1295	55.67	126	280.39
TRR1	mRNA	959	38.2	126	280.39
QCR8	mRNA	284	49.13	125	278.165
IMD3	mRNA	1571	40	125	278.165
SSB1	mRNA	1841	39.66	125	278.165
QCR7	mRNA	383	55.965	124	275.939
ASN1	mRNA	1718	36.655	124	275.939
CDC48	mRNA	2507	38	123	273.714
SEM1	mRNA	269	38.79	123	273.714
PHB1	mRNA	863	51.44	123	273.714
GCV3	mRNA	512	34.23	123	273.714
DDR48	mRNA	1292	52.21	123	273.714
PIC2	mRNA	902	45.48	123	273.714
UTR2	mRNA	1403	50.82	121	269.263
HSP10	mRNA	320	40.33	121	269.263
GRX1	mRNA	332	48.22	121	269.263
ELO3	mRNA	1037	47.93	120	267.038
ALD6	mRNA	1502	61.695	120	267.038
YRA1	mRNA	681	49.955	120	267.038
TOM6	mRNA	185	46.065	120	267.038
PIS1	mRNA	662	53.575	120	267.038
ERG6	mRNA	1151	40.595	120	267.038
VMA10	mRNA	345	39.685	120	267.038
ZUO1	mRNA	1301	37	119	264.813
CYS3	mRNA	1184	44.88	119	264.813
YBR085C-A	mRNA	257	55.23	118	262.588
RGI1	mRNA	485	52.2	117	260.362
SNA3	mRNA	401	37.58	117	260.362
GPH1	mRNA	2708	52.71	117	260.362
SND3	mRNA	566	41.52	117	260.362
YGP1	mRNA	1064	56.67	117	260.362
ATP4	mRNA	734	40.525	116	258.137
CCT3	mRNA	1604	34.615	116	258.137
SMT3	mRNA	305	38.655	116	258.137
ATP16	mRNA	482	40.86	115	255.912
ERG10	mRNA	1196	43.92	115	255.912
YDJ1	mRNA	1229	39.16	115	255.912
YDL124W	mRNA	938	51.32	115	255.912
SES1	mRNA	1388	37.095	114	253.686
ATP19	mRNA	206	41.04	113	251.461
PRE1	mRNA	596	45.87	113	251.461
ERG25	mRNA	929	53.225	112	249.236
UBC4	mRNA	447	47.6	112	249.236
SML1	mRNA	314	68.345	112	249.236
HIS1	mRNA	893	37.33	112	249.236
ACP1	mRNA	377	45.77	111	247.01
GLC7	mRNA	939	48.91	111	247.01
INA1	mRNA	2027	57.44	111	247.01
SND2	mRNA	545	39.885	110	244.785
PFK2	mRNA	2879	44.54	110	244.785
ACO1	mRNA	2336	55.45	110	244.785
PYP1	mRNA	725	37.55	110	244.785
SSZ1	mRNA	1616	33.265	110	244.785
GUK1	mRNA	563	39.1	109	242.56
UBI4	mRNA	1145	67.17	109	242.56
CHA1	mRNA	1082	42.42	109	242.56
IZH2	mRNA	953	54.215	108	240.334
YNK1	mRNA	461	48.76	108	240.334
ATP3	mRNA	935	43.88	107	238.109
YLR257W	mRNA	965	44.71	107	238.109
VMA1	mRNA	3215	42.76	107	238.109
SOD2	mRNA	701	46.97	106	235.884
MEO1	mRNA	206	52.155	106	235.884
ILS1	mRNA	3218	39.935	106	235.884
COQ5	mRNA	923	38.405	106	235.884
VMA4	mRNA	701	41.235	106	235.884
RDI1	mRNA	608	37.67	105	233.658
CDC60	mRNA	3272	37.78	105	233.658
TIF2	mRNA	1187	41.28	104	231.433
RPT2	mRNA	1313	35.385	104	231.433
RIM1	mRNA	408	48.125	104	231.433
SSH1	mRNA	1472	40.275	104	231.433
SAM4	mRNA	977	37.51	104	231.433
HOM6	mRNA	1079	37.6	104	231.433
ARF2	mRNA	585	45.96	103	229.208
ARO2	mRNA	1130	38.31	103	229.208
CAF20	mRNA	485	46.3	103	229.208
RPS4B	mRNA	786	36.69	102	226.982
GUA1	mRNA	1577	37.28	102	226.982
ASN2	mRNA	1718	42.71	102	226.982
GPD2	mRNA	1322	54.635	102	226.982
ATP17	mRNA	305	41.12	101	224.757
EMP24	mRNA	611	38.87	101	224.757
RHO1	mRNA	629	45.48	101	224.757
VAS1	mRNA	3314	36.96	101	224.757
ADE5_2C7	mRNA	2408	40.19	101	224.757
CPR5	mRNA	677	40.83	100	222.532
LIA1	mRNA	977	48.26	100	222.532
PST2	mRNA	596	42.92	99	220.306
RIB4	mRNA	509	34.52	99	220.306
SAM1	mRNA	1148	55.62	99	220.306
RPO26	mRNA	468	49.64	98	218.081
SBH2	mRNA	266	36.44	98	218.081
SIM1	mRNA	1433	53.335	98	218.081
SSA1	mRNA	1928	48.2	97	215.856
GSF2	mRNA	1211	48.2	97	215.856
RDL1	mRNA	419	41.58	97	215.856
NHP6A	mRNA	281	48.36	96	213.631
NTF2	mRNA	377	40.67	96	213.631
NPC2	mRNA	521	57.45	96	213.631
YSY6	mRNA	197	36.495	96	213.631
CRH1	mRNA	1523	50.79	96	213.631
HXT7	mRNA	1712	68.22	96	213.631
FAA4	mRNA	2084	48.745	96	213.631
HPT1	mRNA	665	49.89	96	213.631
VMA7	mRNA	356	43.92	96	213.631
VMA16	mRNA	641	41.305	96	213.631
RNR2	mRNA	1199	49.8	95	211.405
YMR295C	mRNA	593	59.16	95	211.405
FKS1	mRNA	5630	48.32	95	211.405
YET3	mRNA	611	51.665	94	209.18
HSP60	mRNA	1718	38.22	94	209.18
DYS1	mRNA	1163	37.32	94	209.18
LEU1	mRNA	2339	51.54	94	209.18
ARO8	mRNA	1502	43.33	93	206.955
MUP1	mRNA	1724	56.4	93	206.955
HNT1	mRNA	477	41.83	92	204.729
VTC3	mRNA	2507	37.27	92	204.729
COX6	mRNA	446	59.4	92	204.729
RPN2	mRNA	2837	40.44	91	202.504
TYS1	mRNA	1184	43	91	202.504
NSR1	mRNA	1244	35.25	91	202.504
NHP6B	mRNA	327	48.535	90	200.279
FCY2	mRNA	1601	42.385	90	200.279
LEU4	mRNA	1859	51.685	90	200.279
SNC2	mRNA	347	49.16	89	198.053
RPC10	mRNA	212	51.48	89	198.053
YPT1	mRNA	620	42.13	89	198.053
YSA1	mRNA	695	42.87	89	198.053
FRS1	mRNA	1787	43.775	88	195.828
PRY1	mRNA	899	61.465	88	195.828
PRO3	mRNA	860	44.755	88	195.828
YOP1	mRNA	543	66.32	88	195.828
NDE1	mRNA	1682	50.925	88	195.828
SPL2	mRNA	446	49.56	88	195.828
QCR6	mRNA	443	45.29	87	193.603
VPS68	mRNA	554	47.14	87	193.603
ELO1	mRNA	932	48.465	86	191.377
ARC35	mRNA	1028	38.67	86	191.377
PUB1	mRNA	1361	56.21	86	191.377
HSP30	mRNA	998	54.175	86	191.377
SUI2	mRNA	914	48.565	86	191.377
PRE9	mRNA	776	41.33	86	191.377
MPC2	mRNA	389	45.96	86	191.377
RPG1	mRNA	2894	44.62	85	189.152
GLY1	mRNA	1163	65.87	84	186.927
SAR1	mRNA	573	49.745	84	186.927
CBF5	mRNA	1451	35.18	84	186.927
VMA8	mRNA	770	37.53	84	186.927
THR4	mRNA	1544	42.76	83	184.701
CMK2	mRNA	1343	37.88	83	184.701
GAS5	mRNA	1454	52.22	83	184.701
TIF34	mRNA	1043	40.25	83	184.701
SRP14	mRNA	440	38.9	83	184.701
CAM1	mRNA	1247	38.65	82	182.476
SUR2	mRNA	1049	52.085	82	182.476
SBH1	mRNA	248	39.215	82	182.476
DPS1	mRNA	1673	41.5	82	182.476
TIF35	mRNA	824	42.7	82	182.476
FRS2	mRNA	1511	43.495	82	182.476
SCS2	mRNA	734	47.705	82	182.476
ERG1	mRNA	1490	72.25	81	180.251
YET1	mRNA	620	46.26	81	180.251
IMD4	mRNA	1575	41.28	81	180.251
TIM8	mRNA	263	45.57	81	180.251
CDC37	mRNA	1520	34.46	81	180.251
NOP58	mRNA	1535	45.77	81	180.251
GUS1	mRNA	2126	42	81	180.251
WTM1	mRNA	1313	46.665	80	178.025
VTC4	mRNA	2165	41.32	80	178.025
ARC19	mRNA	515	46.825	80	178.025
ATP15	mRNA	188	47.87	79	175.8
MDH1	mRNA	1004	41.18	79	175.8
MDM35	mRNA	260	49.33	79	175.8
MCR1	mRNA	965	48.17	79	175.8
TSC13	mRNA	932	43.5	79	175.8
DBP2	mRNA	1641	30.61	79	175.8
GVP36	mRNA	980	46.81	79	175.8
YPT7	mRNA	626	45.655	78	173.575
SEC13	mRNA	893	36.49	78	173.575
PRE7	mRNA	725	46.665	78	173.575
TPM1	mRNA	599	47.86	77	171.349
COR1	mRNA	1373	46.09	77	171.349
ARP2	mRNA	1176	41.56	77	171.349
ADE6	mRNA	4076	44.28	77	171.349
PHO86	mRNA	935	36.54	77	171.349
TOM40	mRNA	1163	61.945	76	169.124
NYV1	mRNA	762	64.64	75	166.899
ATP14	mRNA	374	59.83	75	166.899
RPN8	mRNA	1016	35.73	75	166.899
PGM2	mRNA	1709	55.16	75	166.899
SEC61	mRNA	1442	35.82	75	166.899
SIS1	mRNA	1058	54.33	75	166.899
COX5B	mRNA	456	38.3	75	166.899
AAT2	mRNA	1256	42.04	75	166.899
SPO24	mRNA	203	53.18	74	164.674
SDH4	mRNA	545	72.47	74	164.674
CTF8	mRNA	401	46.37	74	164.674
ELO2	mRNA	1043	54.03	74	164.674
PAA1	mRNA	575	38.05	74	164.674
LPD1	mRNA	1499	39.4	74	164.674
PDB1	mRNA	1100	43.48	74	164.674
GDH1	mRNA	1364	37.12	74	164.674
QCR9	mRNA	201	53.26	74	164.674
ERG4	mRNA	1421	42.92	73	162.448
ZRT1	mRNA	1130	58.37	73	162.448
VRG4	mRNA	1013	54.73	73	162.448
CMD1	mRNA	443	46.73	73	162.448
GDT1	mRNA	842	46.03	73	162.448
ITR1	mRNA	1754	43.97	73	162.448
EMC4	mRNA	572	47.59	73	162.448
COX5A	mRNA	461	61.58	73	162.448
HMO1	mRNA	740	45.3	73	162.448
OM14	mRNA	405	58.7	73	162.448
TUF1	mRNA	1313	42.04	73	162.448
DUG1	mRNA	1445	40.58	73	162.448
FPR4	mRNA	1178	34.195	72	160.223
IRC22	mRNA	677	36.305	72	160.223
VMA5	mRNA	1178	48.54	72	160.223
POB3	mRNA	1658	39.91	72	160.223
PUP3	mRNA	617	40.865	72	160.223
CIT1	mRNA	1439	49.37	71	157.998
ECM15	mRNA	314	46	71	157.998
UBP6	mRNA	1499	39.12	71	157.998
RPS8A	mRNA	610	51.73	71	157.998
HIS4	mRNA	2399	40.58	71	157.998
CPR3	mRNA	548	42.08	71	157.998
SCL1	mRNA	758	39.67	71	157.998
ATP7	mRNA	524	43.075	70	155.772
YKT6	mRNA	602	42.015	70	155.772
RPS14B	mRNA	417	37.615	70	155.772
CBS1	mRNA	689	42.185	70	155.772
ERP1	mRNA	659	42.145	70	155.772
ARO3	mRNA	1112	42.145	70	155.772
STT3	mRNA	2156	45.48	70	155.772
MET14	mRNA	608	50.02	70	155.772
GBP2	mRNA	1283	42.05	70	155.772
ERV14	mRNA	416	45.78	70	155.772
CPR6	mRNA	1115	37.76	69	153.547
PST1	mRNA	1334	48.54	69	153.547
HMF1	mRNA	389	49.25	69	153.547
COX9	mRNA	179	56.54	69	153.547
RBG1	mRNA	1109	30.925	68	151.322
PCL5	mRNA	689	46.4	68	151.322
RPL22B	mRNA	369	55.57	68	151.322
HRP1	mRNA	1604	57.39	68	151.322
SAM2	mRNA	1154	46.375	68	151.322
KTR1	mRNA	1181	49.32	68	151.322
DAP1	mRNA	458	48.055	68	151.322
ARC15	mRNA	464	52.32	68	151.322
TMH11	mRNA	317	47.03	67	149.096
MDM34	mRNA	1379	53.52	67	149.096
COS1	mRNA	1145	45.24	67	149.096
VTC2	mRNA	2486	39.96	67	149.096
SDD2	mRNA	437	41.7	67	149.096
GSY1	mRNA	2126	40.96	67	149.096
TOM7	mRNA	182	51.89	67	149.096
PPX1	mRNA	1193	39.55	67	149.096
ILV2	mRNA	2063	57.32	67	149.096
QCR2	mRNA	1106	44.09	67	149.096
SEC23	mRNA	2306	63.05	67	149.096
APT1	mRNA	563	52.1	67	149.096
ERV25	mRNA	635	36.43	66	146.871
YHM2	mRNA	944	46.685	66	146.871
TPO3	mRNA	1868	58.09	66	146.871
RPL1B	mRNA	653	45.875	66	146.871
KRE2	mRNA	1328	52.93	66	146.871
AMN1	mRNA	1649	48.38	66	146.871
MGE1	mRNA	686	41.845	66	146.871
CYC7	mRNA	341	51.495	66	146.871
SSP120	mRNA	704	35.5	65	144.646
TNA1	mRNA	1604	55.78	65	144.646
PMT2	mRNA	2279	37.12	65	144.646
HTS1	mRNA	1640	35.48	65	144.646
BRX1	mRNA	875	41.79	65	144.646
ZRC1	mRNA	1328	40	65	144.646
PRY2	mRNA	989	56.65	65	144.646
YPL225W	mRNA	440	37.45	65	144.646
PMT4	mRNA	2288	39.815	64	142.42
ABF2	mRNA	551	49.975	64	142.42
RPB8	mRNA	440	38.6	64	142.42
MIC10	mRNA	293	39.42	64	142.42
COX12	mRNA	251	45.96	64	142.42
TIF6	mRNA	737	63.345	64	142.42
TIM17	mRNA	476	47.095	64	142.42
TOM5	mRNA	152	45.765	64	142.42
RET3	mRNA	569	40.065	64	142.42
RPN1	mRNA	2981	45.71	63	140.195
DEF1	mRNA	2216	36	63	140.195
RAS2	mRNA	968	39.52	63	140.195
VAN1	mRNA	1607	59.32	63	140.195
URA7	mRNA	1739	47	63	140.195
YDR341C	mRNA	1823	38.15	63	140.195
PPN2	mRNA	980	40.68	63	140.195
KTR4	mRNA	1394	46.36	63	140.195
COX8	mRNA	236	47.05	63	140.195
TPS1	mRNA	1487	51.35	62	137.97
TPS2	mRNA	2690	59.48	62	137.97
RPL7A	mRNA	736	42.23	62	137.97
TVP18	mRNA	503	51.855	62	137.97
ZWF1	mRNA	1517	42.285	62	137.97
PRE2	mRNA	863	38.72	62	137.97
CCT5	mRNA	1688	38.81	62	137.97
LOG1	mRNA	737	42.24	62	137.97
SDH2	mRNA	800	66.17	61	135.744
TOM22	mRNA	458	45.27	61	135.744
SUN4	mRNA	1275	65.28	61	135.744
BDH1	mRNA	1148	47.25	61	135.744
SDH3	mRNA	596	54.33	61	135.744
RPL18B	mRNA	561	39.58	61	135.744
TSC3	mRNA	242	43.91	61	135.744
SPI1	mRNA	446	58.31	61	135.744
CWP1	mRNA	719	59.68	61	135.744
ARA1	mRNA	1034	50.6	61	135.744
PRE8	mRNA	752	43.64	61	135.744
ARG4	mRNA	1391	45.84	61	135.744
SRP54	mRNA	1625	47.7	61	135.744
SHR3	mRNA	632	38.85	60	133.519
CRS1	mRNA	2303	34.35	60	133.519
VPS21	mRNA	632	44.025	60	133.519
COX13	mRNA	389	46.54	60	133.519
MXR1	mRNA	554	47.66	60	133.519
ADH6	mRNA	1082	40.27	60	133.519
MES1	mRNA	2255	40.83	60	133.519
NCW2	mRNA	764	46.975	60	133.519
SRV2	mRNA	1580	43.16	60	133.519
PRE4	mRNA	800	46.015	60	133.519
RPE1	mRNA	716	43.005	60	133.519
LCB1	mRNA	1676	42.215	60	133.519
IST2	mRNA	2840	44.035	60	133.519
HAC1	mRNA	717	53.68	59	131.294
ATP5	mRNA	638	44.75	59	131.294
POM33	mRNA	839	64.05	59	131.294
PRE6	mRNA	764	36.18	59	131.294
NIP7	mRNA	545	44.87	59	131.294
LSM5	mRNA	281	40.35	59	131.294
IZH1	mRNA	950	59.7	59	131.294
RPB10	mRNA	212	49.05	59	131.294
OST1	mRNA	1430	40.985	58	129.068
CDC42	mRNA	575	46.41	58	129.068
FPR3	mRNA	1235	28.52	58	129.068
RPN11	mRNA	920	43.33	58	129.068
QDR2	mRNA	1628	54.24	58	129.068
HMRA1	mRNA	382	45.095	58	129.068
SPE3	mRNA	881	42.41	58	129.068
LSM6	mRNA	260	45.89	58	129.068
MAP2	mRNA	1265	40.035	58	129.068
IMD2	mRNA	1571	54.275	58	129.068
ARC40	mRNA	1154	45.12	57	126.843
CLG1	mRNA	1358	51.43	57	126.843
RPT5	mRNA	1304	46.18	57	126.843
CHO1	mRNA	830	52.7	57	126.843
COP1	mRNA	3605	39.87	57	126.843
MIR1	mRNA	935	48.75	57	126.843
SHB17	mRNA	815	35.62	57	126.843
RPT1	mRNA	1403	43.74	57	126.843
SRP21	mRNA	503	48.04	57	126.843
SEC24	mRNA	2780	48.81	57	126.843
VMA2	mRNA	1553	42.06	57	126.843
GLN4	mRNA	2429	38.82	56	124.618
AIP1	mRNA	1847	36.06	56	124.618
GLC3	mRNA	2114	54.83	56	124.618
MIX17	mRNA	470	44.84	56	124.618
FRD1	mRNA	1412	51.705	56	124.618
DOT6	mRNA	2012	39.52	56	124.618
VMA9	mRNA	223	33.615	56	124.618
LAT1	mRNA	1448	31.75	56	124.618
ALA1	mRNA	2876	38.015	56	124.618
EIS1	mRNA	2531	54	55	122.392
OST5	mRNA	261	45.73	55	122.392
MAP1	mRNA	1163	47.31	55	122.392
PEA2	mRNA	1262	43.83	55	122.392
RER1	mRNA	566	45.05	55	122.392
FAS2	mRNA	5663	52.67	55	122.392
MIC19	mRNA	512	42.67	55	122.392
GSY2	mRNA	2117	55.56	55	122.392
PRE5	mRNA	704	46.42	55	122.392
YIP5	mRNA	932	47.09	55	122.392
TIM11	mRNA	290	41.93	55	122.392
FAS1	mRNA	6155	47.48	55	122.392
YCP4	mRNA	743	44.62	55	122.392
TUB1	mRNA	1344	38.19	55	122.392
SSO2	mRNA	887	51.975	54	120.167
PHO13	mRNA	938	42.22	54	120.167
RPT4	mRNA	1313	38.595	54	120.167
CCT7	mRNA	1652	38.15	54	120.167
APA1	mRNA	965	41.455	54	120.167
VCX1	mRNA	1235	56.38	54	120.167
PMI40	mRNA	1290	49.86	54	120.167
IFA38	mRNA	1043	36.35	53	117.942
NSG2	mRNA	899	46.12	53	117.942
ZRT2	mRNA	1268	44.92	53	117.942
EFT2	mRNA	2528	52.12	53	117.942
HTZ1	mRNA	404	45	53	117.942
RVS161	mRNA	797	52.54	53	117.942
GET1	mRNA	707	37.17	53	117.942
STF1	mRNA	260	50	53	117.942
PRE10	mRNA	866	44.26	53	117.942
GLR1	mRNA	1451	40.39	53	117.942
YMR099C	mRNA	893	39.74	53	117.942
LSM2	mRNA	288	52.65	53	117.942
DLD3	mRNA	1490	43.665	52	115.717
RPN3	mRNA	1571	37.04	52	115.717
RPN6	mRNA	1304	42.01	52	115.717
PHO8	mRNA	1700	45.88	52	115.717
BAP3	mRNA	1814	48.865	52	115.717
CLC1	mRNA	701	41.22	52	115.717
SVF1	mRNA	1445	40.58	52	115.717
YPR204W	mRNA	3098	53.45	52	115.717
RPN5	mRNA	1337	41.52	51	113.491
RPS9A	mRNA	594	58.32	51	113.491
TSL1	mRNA	3296	60.61	51	113.491
APS2	mRNA	443	39.04	51	113.491
NPT1	mRNA	1289	40.56	51	113.491
OM45	mRNA	1181	40.43	51	113.491
AGP1	mRNA	1901	53.96	51	113.491
YLR179C	mRNA	605	42.52	50	111.266
GLO3	mRNA	1481	45.69	50	111.266
MRPS18	mRNA	653	44.575	50	111.266
ERG28	mRNA	446	50.455	50	111.266
SUR7	mRNA	908	54.535	50	111.266
TPO2	mRNA	1844	64.265	50	111.266
CCP1	mRNA	1085	64.355	50	111.266
VPS55	mRNA	422	47.655	50	111.266
PHB2	mRNA	932	42.135	50	111.266
KRE1	mRNA	941	43.235	50	111.266
ADE16	mRNA	1775	44.18	50	111.266
RNA1	mRNA	1223	35.13	50	111.266
PRS1	mRNA	1283	38.215	50	111.266
HIS5	mRNA	1157	46.96	50	111.266
PRE3	mRNA	648	39.84	50	111.266
SER33	mRNA	1409	45.22	50	111.266
KSH1	mRNA	218	51.095	50	111.266
SEC28	mRNA	890	40.54	50	111.266
RPS6B	mRNA	711	57.4	50	111.266
FUR1	mRNA	650	38.78	50	111.266
COX14	mRNA	212	58.06	49	109.041
WBP1	mRNA	1292	42.69	49	109.041
CBC2	mRNA	626	51.67	49	109.041
RIP1	mRNA	647	55.39	49	109.041
RBD2	mRNA	788	48.15	49	109.041
YPQ1	mRNA	926	45.61	49	109.041
LCB2	mRNA	1685	32.23	49	109.041
MVD1	mRNA	1190	48.24	49	109.041
VPS74	mRNA	1037	38.12	49	109.041
ALD4	mRNA	1559	45.65	49	109.041
SFT1	mRNA	294	49.37	49	109.041
SEC14	mRNA	915	58.05	49	109.041
LOC1	mRNA	614	39.76	49	109.041
MRPL51	mRNA	422	36.21	49	109.041
PUP1	mRNA	785	37.29	49	109.041
PDR16	mRNA	1055	41.53	48	106.815
PGA3	mRNA	938	40.79	48	106.815
BRE5	mRNA	1547	46.505	48	106.815
RPB5	mRNA	647	55.225	48	106.815
SCW11	mRNA	1628	64.79	48	106.815
MDH2	mRNA	1133	57.715	48	106.815
MCA1	mRNA	1298	45.195	48	106.815
UBP3	mRNA	2738	40.065	48	106.815
RPN7	mRNA	1289	41.5	48	106.815
FUN12	mRNA	3008	36.045	48	106.815
AIM29	mRNA	467	37.575	48	106.815
ERG13	mRNA	1475	46.265	48	106.815
WRS1	mRNA	1298	37.485	48	106.815
ARB1	mRNA	1832	46.05	48	106.815
SOP4	mRNA	704	39.955	48	106.815
KIN3	mRNA	1307	44.87	48	106.815
GFA1	mRNA	2153	47.73	47	104.59
POL30	mRNA	776	49.35	47	104.59
NIP1	mRNA	2438	47.6	47	104.59
YDC1	mRNA	953	44.38	47	104.59
MFA1	mRNA	110	73.57	47	104.59
PBI2	mRNA	227	55.81	47	104.59
RLI1	mRNA	1826	69.15	47	104.59
BDF2	mRNA	1916	45.11	47	104.59
YPT52	mRNA	704	29.41	47	104.59
CBR1	mRNA	854	37.13	47	104.59
HAP4	mRNA	1664	55.33	47	104.59
YIP3	mRNA	531	53.32	47	104.59
LSM7	mRNA	348	40.69	47	104.59
PTR2	mRNA	1805	68.83	47	104.59
PTC3	mRNA	1406	36.65	47	104.59
TMA20	mRNA	546	38.78	47	104.59
FSH1	mRNA	731	46.78	47	104.59
YOR283W	mRNA	692	51.98	46	102.365
KRE29	mRNA	1394	50.465	46	102.365
SCS7	mRNA	1154	41.51	46	102.365
TCP1	mRNA	1679	44.74	46	102.365
ENT2	mRNA	1841	29.225	46	102.365
ERG24	mRNA	1316	51.17	46	102.365
MSN4	mRNA	1892	55.64	46	102.365
SHS1	mRNA	1655	42.745	46	102.365
ERV46	mRNA	1247	39.18	46	102.365
RPN13	mRNA	470	45.76	46	102.365
COX7	mRNA	182	50.695	46	102.365
TMA10	mRNA	260	54.55	46	102.365
ILV6	mRNA	929	46.585	46	102.365
CCT6	mRNA	1640	35.405	46	102.365
YRF1-5	mRNA	5390	52.455	46	102.365
VPH1	mRNA	2522	42.21	46	102.365
MRP2	mRNA	347	46.77	46	102.365
NOP7	mRNA	1817	35.66	45	100.139
TPO4	mRNA	1979	56.28	45	100.139
GNP1	mRNA	1991	46.83	45	100.139
PLN1	mRNA	851	52.85	45	100.139
FPR2	mRNA	407	45.22	45	100.139
FAA1	mRNA	2102	43.33	45	100.139
GCD11	mRNA	1583	43.07	45	100.139
THR1	mRNA	1073	40.04	45	100.139
CYT1	mRNA	929	43.17	45	100.139
DED1	mRNA	1814	74.21	45	100.139
IMG2	mRNA	440	63.5	45	100.139
SRP40	mRNA	1220	44.66	44	97.914
IDH2	mRNA	1109	43.715	44	97.914
TMA17	mRNA	452	50.135	44	97.914
EGT2	mRNA	3125	61.08	44	97.914
SPT5	mRNA	3191	36.44	44	97.914
GPP2	mRNA	752	55.31	44	97.914
LSM3	mRNA	269	32.25	44	97.914
DBP5	mRNA	1448	36.755	44	97.914
QCR10	mRNA	234	73.445	44	97.914
KGD2	mRNA	1391	48.71	44	97.914
ALD5	mRNA	1562	46.185	44	97.914
RIB5	mRNA	716	42.88	44	97.914
SEC66	mRNA	620	42.51	44	97.914
ICY1	mRNA	383	44.975	44	97.914
LHP1	mRNA	827	45	44	97.914
ARL1	mRNA	551	38.94	44	97.914
LSM12	mRNA	563	38.275	44	97.914
ARP3	mRNA	1349	38.23	44	97.914
ETT1	mRNA	1238	46.03	44	97.914
ATP20	mRNA	347	45.13	44	97.914
SVS1	mRNA	782	54.06	44	97.914
PHO3	mRNA	1403	43.88	43	95.6887
PYC2	mRNA	3542	37.96	43	95.6887
CIC1	mRNA	1130	45.83	43	95.6887
MRPS12	mRNA	461	44.74	43	95.6887
PUP2	mRNA	782	35.9	43	95.6887
HCR1	mRNA	797	41.47	43	95.6887
COS6	mRNA	1145	48.88	43	95.6887
ECM14	mRNA	1292	47	43	95.6887
AIM45	mRNA	1034	55.65	43	95.6887
NSG1	mRNA	875	44.04	43	95.6887
BUR6	mRNA	428	36.55	43	95.6887
CRP1	mRNA	1397	43.47	43	95.6887
THO1	mRNA	656	38.55	43	95.6887
EMP70	mRNA	2003	50.76	43	95.6887
TOH1	mRNA	1190	68.52	43	95.6887
HYR1	mRNA	491	39.71	43	95.6887
DPM1	mRNA	803	43.5	43	95.6887
FOL2	mRNA	731	30.39	43	95.6887
MDE1	mRNA	734	67.29	43	95.6887
RPC19	mRNA	428	45.36	43	95.6887
GDI1	mRNA	1355	56.13	43	95.6887
CDC3	mRNA	1562	53.75	43	95.6887
ATG27	mRNA	815	41.605	42	93.4634
INH1	mRNA	257	56.87	42	93.4634
UBC1	mRNA	647	45.23	42	93.4634
SPT4	mRNA	308	54.91	42	93.4634
MTD1	mRNA	962	55.965	42	93.4634
FIS1	mRNA	467	40.615	42	93.4634
HRB1	mRNA	1365	49.44	42	93.4634
SQT1	mRNA	1295	37.915	42	93.4634
ADD66	mRNA	803	42.14	42	93.4634
RPF2	mRNA	1034	36.025	42	93.4634
TYE7	mRNA	875	60.285	42	93.4634
SFM1	mRNA	641	45.34	42	93.4634
AGE1	mRNA	1448	69.415	42	93.4634
MDH3	mRNA	1031	39.455	42	93.4634
ILM1	mRNA	611	48.88	42	93.4634
RFS1	mRNA	632	53.885	42	93.4634
YDR514C	mRNA	1451	57.15	42	93.4634
SER1	mRNA	1187	42.44	42	93.4634
MPC1	mRNA	392	60.46	42	93.4634
CGR1	mRNA	362	32.525	42	93.4634
DSK2	mRNA	1121	41.17	42	93.4634
FUM1	mRNA	1466	43.35	41	91.238
CUP9	mRNA	920	63.91	41	91.238
EDE1	mRNA	4145	58.33	41	91.238
HHO1	mRNA	776	57.68	41	91.238
ERG20	mRNA	1058	42.86	41	91.238
ILV1	mRNA	1730	36.59	41	91.238
HSP82	mRNA	2129	63.05	41	91.238
GNA1	mRNA	479	47.37	41	91.238
AHC2	mRNA	386	43.12	41	91.238
GET3	mRNA	1064	37.42	41	91.238
ACS2	mRNA	2051	43.26	41	91.238
CUE1	mRNA	611	38.83	41	91.238
HIS7	mRNA	1658	34.23	41	91.238
CKB1	mRNA	836	44.45	41	91.238
SCT1	mRNA	2279	44.13	41	91.238
KES1	mRNA	1304	45.14	41	91.238
PGA2	mRNA	389	39.54	41	91.238
GLO1	mRNA	980	48.48	41	91.238
BAT2	mRNA	1130	36.96	41	91.238
ARC18	mRNA	536	37.56	41	91.238
IDI1	mRNA	866	43.65	41	91.238
RVB1	mRNA	1391	43.46	41	91.238
GRS2	mRNA	1856	42.19	41	91.238
ERG5	mRNA	1616	71.795	40	89.0127
COX17	mRNA	209	44.875	40	89.0127
PTH2	mRNA	626	43.795	40	89.0127
MIA40	mRNA	1211	41.785	40	89.0127
RPB9	mRNA	368	42.405	40	89.0127
BFR1	mRNA	1412	41.085	40	89.0127
UBC6	mRNA	752	52.295	40	89.0127
HMT1	mRNA	1046	50.955	40	89.0127
CDC10	mRNA	968	45.43	40	89.0127
VPS1	mRNA	2114	41.77	40	89.0127
ARO9	mRNA	1541	52.405	40	89.0127
YPT31	mRNA	671	35.715	40	89.0127
PIR3	mRNA	977	53.995	40	89.0127
LAG1	mRNA	1235	42.48	40	89.0127
CSG2	mRNA	1232	59	40	89.0127
ALE1	mRNA	1859	43.615	40	89.0127
FRQ1	mRNA	572	49.28	40	89.0127
SPP2	mRNA	557	44.635	40	89.0127
RUB1	mRNA	234	37	40	89.0127
LAC1	mRNA	1256	51.56	40	89.0127
URM1	mRNA	299	49.59	40	89.0127
SNF7	mRNA	722	49.27	40	89.0127
TOM70	mRNA	1853	51.245	40	89.0127
APD1	mRNA	950	46.68	39	86.7874
KAP123	mRNA	3341	42.85	39	86.7874
HAL5	mRNA	2567	52.44	39	86.7874
LYS21	mRNA	1322	48.62	39	86.7874
CDC31	mRNA	485	44.04	39	86.7874
PSG1	mRNA	1178	45.58	39	86.7874
BAP2	mRNA	1829	49	39	86.7874
ADE2	mRNA	1715	50.33	39	86.7874
COA2	mRNA	206	47.39	39	86.7874
OST3	mRNA	1052	57.45	39	86.7874
GOT1	mRNA	417	56.52	39	86.7874
DIP5	mRNA	1826	51.73	39	86.7874
RAD23	mRNA	1196	43.93	39	86.7874
YMR027W	mRNA	1412	35.73	39	86.7874
EMC6	mRNA	326	61.76	39	86.7874
VPS24	mRNA	674	41.12	39	86.7874
PRX1	mRNA	785	45.3	39	86.7874
SEC63	mRNA	1991	38.55	39	86.7874
YBL036C	mRNA	773	45.89	39	86.7874
BET3	mRNA	581	62.5	39	86.7874
TRP5	mRNA	2123	40.82	39	86.7874
FET3	mRNA	1910	49.2	39	86.7874
LSB3	mRNA	1380	42.69	39	86.7874
GAD1	mRNA	1757	45.24	39	86.7874
SWP1	mRNA	860	45.96	39	86.7874
APE4	mRNA	1472	43.04	39	86.7874
RPA49	mRNA	1247	48.695	38	84.5621
GGC1	mRNA	902	43.62	38	84.5621
TMC1	mRNA	452	53.105	38	84.5621
SDH1	mRNA	1922	63.69	38	84.5621
STP4	mRNA	1472	55.835	38	84.5621
HAS1	mRNA	1517	36.54	38	84.5621
ERP2	mRNA	647	35.42	38	84.5621
GRX5	mRNA	452	42.72	38	84.5621
YMR315W	mRNA	1049	47.805	38	84.5621
ALK1	mRNA	2282	41.7	38	84.5621
RIB3	mRNA	626	35.415	38	84.5621
NUG1	mRNA	1562	42.21	38	84.5621
MET22	mRNA	1073	48.985	38	84.5621
SPT15	mRNA	722	46.655	38	84.5621
TAF14	mRNA	735	47.34	38	84.5621
PRB1	mRNA	1907	56.785	38	84.5621
MLC1	mRNA	449	44.635	38	84.5621
RPA34	mRNA	701	43	38	84.5621
SSU1	mRNA	1376	51.53	38	84.5621
MCK1	mRNA	1127	53.36	38	84.5621
UGA1	mRNA	1415	53.73	38	84.5621
ALT1	mRNA	1778	47.035	38	84.5621
YGR130C	mRNA	2450	60.44	38	84.5621
ELF1	mRNA	437	44.655	38	84.5621
YMR31	mRNA	371	47.6	38	84.5621
SMD3	mRNA	305	48.5	37	82.3368
RPT6	mRNA	1217	47.54	37	82.3368
YBR056W	mRNA	1505	37.96	37	82.3368
PHM6	mRNA	314	62.29	37	82.3368
TOA2	mRNA	368	65.29	37	82.3368
GDA1	mRNA	1556	40.67	37	82.3368
RPB2	mRNA	3674	44.57	37	82.3368
ADH5	mRNA	1055	50.07	37	82.3368
TDA1	mRNA	1760	57	37	82.3368
TCB3	mRNA	4637	38.83	37	82.3368
ACC1	mRNA	6701	40.62	37	82.3368
CUZ1	mRNA	824	34.32	37	82.3368
MCM1	mRNA	860	51.09	37	82.3368
KRE9	mRNA	830	50.71	37	82.3368
YPK1	mRNA	2042	40.17	37	82.3368
YHB1	mRNA	1199	46.6	37	82.3368
PUN1	mRNA	791	41.34	37	82.3368
URA4	mRNA	1094	42.18	37	82.3368
DFG5	mRNA	1376	35.96	37	82.3368
RRB1	mRNA	1535	35.27	37	82.3368
OPT1	mRNA	2399	51.65	37	82.3368
ETR1	mRNA	1142	40.42	37	82.3368
GAS3	mRNA	1574	52.28	37	82.3368
RPC40	mRNA	1007	40.44	37	82.3368
YCK1	mRNA	1616	41.04	37	82.3368
TIR1	mRNA	764	68.09	37	82.3368
IGO1	mRNA	506	51.11	37	82.3368
YOS1	mRNA	259	38.67	37	82.3368
CCT8	mRNA	1706	37.27	37	82.3368
PKR1	mRNA	368	49.42	37	82.3368
MYO2	mRNA	4724	33.58	37	82.3368
TAT2	mRNA	1778	49.84	37	82.3368
NOP6	mRNA	677	31.93	36	80.1114
NOP2	mRNA	1856	37.405	36	80.1114
LYS12	mRNA	1115	47.6	36	80.1114
MSC1	mRNA	1541	53.115	36	80.1114
MSC7	mRNA	1934	49.165	36	80.1114
NUP57	mRNA	1625	43.635	36	80.1114
NUP116	mRNA	3341	32.915	36	80.1114
MRT4	mRNA	710	40.16	36	80.1114
APQ12	mRNA	416	49.97	36	80.1114
RSC8	mRNA	1673	43.22	36	80.1114
TFG2	mRNA	1202	45.175	36	80.1114
SCP160	mRNA	3668	43.53	36	80.1114
MKT1	mRNA	2492	38.575	36	80.1114
TCB1	mRNA	3560	43.895	36	80.1114
PIN3	mRNA	647	61.62	36	80.1114
ASH1	mRNA	1766	49.125	36	80.1114
EMC1	mRNA	2282	44.035	36	80.1114
PBP4	mRNA	557	50.105	36	80.1114
RPS22B	mRNA	401	51.08	36	80.1114
REE1	mRNA	596	44.875	36	80.1114
LSC2	mRNA	1283	49.735	36	80.1114
CCT2	mRNA	1583	43.2	36	80.1114
CCT4	mRNA	1586	36.865	36	80.1114
ADE3	mRNA	2840	45.67	36	80.1114
CHS5	mRNA	2015	45.635	36	80.1114
ERV29	mRNA	932	46.27	36	80.1114
YIM1	mRNA	1097	51.31	36	80.1114
RLP7	mRNA	968	40.305	36	80.1114
STE18	mRNA	332	55.86	35	77.8861
YIF1	mRNA	944	61.09	35	77.8861
POP2	mRNA	1301	43.68	35	77.8861
OST2	mRNA	392	43.88	35	77.8861
BCY1	mRNA	1250	48.19	35	77.8861
CDC12	mRNA	1223	43.44	35	77.8861
RSM18	mRNA	416	43.26	35	77.8861
PTK2	mRNA	2456	47.19	35	77.8861
MCH4	mRNA	1505	46.08	35	77.8861
SEC11	mRNA	503	47.57	35	77.8861
HIS3	mRNA	662	39.69	35	77.8861
MNP1	mRNA	584	36.96	35	77.8861
LEU9	mRNA	1814	50.57	35	77.8861
MLC2	mRNA	491	40.14	35	77.8861
VMA13	mRNA	1436	43.17	35	77.8861
CDC1	mRNA	1475	45.21	35	77.8861
ISA1	mRNA	752	72.91	35	77.8861
DAP2	mRNA	2456	41.17	35	77.8861
PDX3	mRNA	686	40.14	35	77.8861
DHH1	mRNA	1520	82	35	77.8861
DIC1	mRNA	896	35.12	35	77.8861
TLG1	mRNA	674	45.46	35	77.8861
HRI1	mRNA	734	39.04	35	77.8861
RVB2	mRNA	1415	40.71	35	77.8861
TAT1	mRNA	1859	45.74	35	77.8861
NEW1	mRNA	3590	42.25	35	77.8861
HSP42	mRNA	1127	41.28	34	75.6608
TUB3	mRNA	1338	45.52	34	75.6608
MRPL31	mRNA	395	56.675	34	75.6608
ARG7	mRNA	1325	37.18	34	75.6608
AYR1	mRNA	893	46.825	34	75.6608
RNQ1	mRNA	1217	50.17	34	75.6608
RPO21	mRNA	5201	52.805	34	75.6608
KRR1	mRNA	950	41.715	34	75.6608
ADE4	mRNA	1532	48.065	34	75.6608
HEM3	mRNA	983	52.145	34	75.6608
PPQ1	mRNA	1649	67.62	34	75.6608
NTH1	mRNA	2255	37.75	34	75.6608
GLC8	mRNA	689	42.96	34	75.6608
UBC13	mRNA	462	37.855	34	75.6608
GET4	mRNA	938	38.785	34	75.6608
STE6	mRNA	3872	48.85	34	75.6608
HEM15	mRNA	1181	56.25	34	75.6608
SEC72	mRNA	581	38.13	34	75.6608
EMC2	mRNA	878	45.915	34	75.6608
PAN6	mRNA	929	41.35	34	75.6608
PAN5	mRNA	1139	36.345	34	75.6608
BET5	mRNA	479	52.145	34	75.6608
HOG1	mRNA	1307	39.67	34	75.6608
SER2	mRNA	929	43.415	34	75.6608
TFS1	mRNA	659	60.125	34	75.6608
HUT1	mRNA	1019	48.96	34	75.6608
CST26	mRNA	1193	39.255	34	75.6608
TAF10	mRNA	620	39.525	34	75.6608
HOM3	mRNA	1583	52.64	34	75.6608
SLT2	mRNA	1454	51.1	34	75.6608
LRP1	mRNA	554	37.165	34	75.6608
RPB11	mRNA	362	46.71	34	75.6608
DOG2	mRNA	740	53.39	34	75.6608
RNH70	mRNA	1661	35.15	34	75.6608
MRPL50	mRNA	419	37.96	33	73.4355
MRPL38	mRNA	416	51.37	33	73.4355
ATX1	mRNA	221	41.73	33	73.4355
TPM2	mRNA	485	45	33	73.4355
UTR4	mRNA	683	60.32	33	73.4355
UMP1	mRNA	446	42.21	33	73.4355
RPA135	mRNA	3611	37.46	33	73.4355
YPT6	mRNA	647	43.56	33	73.4355
STP3	mRNA	1031	48.91	33	73.4355
MRP10	mRNA	287	52.86	33	73.4355
RSM10	mRNA	611	49.36	33	73.4355
BNA7	mRNA	785	39	33	73.4355
SAT4	mRNA	1811	46.62	33	73.4355
CTR2	mRNA	569	47.78	33	73.4355
IGO2	mRNA	395	47.23	33	73.4355
NMD3	mRNA	1556	50.87	33	73.4355
RPN12	mRNA	824	40.08	33	73.4355
CNB1	mRNA	528	50.49	33	73.4355
MRP7	mRNA	1115	55.17	33	73.4355
URA6	mRNA	614	44.5	33	73.4355
DDP1	mRNA	566	41.35	33	73.4355
MID2	mRNA	1130	53.81	33	73.4355
TOM20	mRNA	551	47.77	33	73.4355
LSC1	mRNA	989	51.87	33	73.4355
CNL1	mRNA	368	40.77	33	73.4355
UPS2	mRNA	692	35.04	33	73.4355
RCF1	mRNA	479	39.6	33	73.4355
GIM3	mRNA	389	45.91	33	73.4355
CKA2	mRNA	1019	47.79	33	73.4355
SND1	mRNA	2633	49.54	33	73.4355
LSM1	mRNA	518	42.33	33	73.4355
NOP16	mRNA	695	36.77	33	73.4355
ENA1	mRNA	3275	66.19	33	73.4355
CWH43	mRNA	2861	49.29	33	73.4355
END3	mRNA	1049	44.92	32	71.2102
LYP1	mRNA	1835	44.01	32	71.2102
MRPL37	mRNA	317	44.035	32	71.2102
TPS3	mRNA	3164	58.04	32	71.2102
ARE2	mRNA	1928	70.285	32	71.2102
DPH5	mRNA	902	44.655	32	71.2102
RPB7	mRNA	515	47.305	32	71.2102
ERD2	mRNA	660	42.58	32	71.2102
DUT1	mRNA	443	43.94	32	71.2102
PDR5	mRNA	4535	67.195	32	71.2102
RRP17	mRNA	707	40.22	32	71.2102
HEM2	mRNA	1028	44.145	32	71.2102
RPB4	mRNA	665	54.565	32	71.2102
PMT1	mRNA	2453	34.88	32	71.2102
BDF1	mRNA	2060	43.06	32	71.2102
SEC65	mRNA	821	41.18	32	71.2102
PMR1	mRNA	2852	51.235	32	71.2102
ARO1	mRNA	4766	43.37	32	71.2102
EBP2	mRNA	1283	42.205	32	71.2102
PRS5	mRNA	1490	40.405	32	71.2102
MIG1	mRNA	1514	48.805	32	71.2102
HSP12	mRNA	329	42.73	32	71.2102
NDI1	mRNA	1541	55.005	32	71.2102
IMP1	mRNA	572	51.585	32	71.2102
FTR1	mRNA	1214	63.49	32	71.2102
AIM17	mRNA	1397	50.64	32	71.2102
MRN1	mRNA	1838	51.415	32	71.2102
YOL057W	mRNA	2135	47.62	32	71.2102
ALG5	mRNA	1004	39.225	32	71.2102
MRPL33	mRNA	260	63.39	31	68.9849
PTM1	mRNA	1571	34.33	31	68.9849
SDS24	mRNA	1583	54.41	31	68.9849
SRP1	mRNA	1628	45.19	31	68.9849
SSA4	mRNA	1928	63.4	31	68.9849
UBC7	mRNA	497	39.45	31	68.9849
BAR1	mRNA	1763	60.65	31	68.9849
FMP52	mRNA	695	45.37	31	68.9849
RSM7	mRNA	743	43.56	31	68.9849
PGM1	mRNA	1712	43.85	31	68.9849
TPD3	mRNA	1907	40.24	31	68.9849
CHO2	mRNA	2609	50	31	68.9849
APS1	mRNA	470	42.41	31	68.9849
RFA3	mRNA	368	41.65	31	68.9849
RCF2	mRNA	674	47.52	31	68.9849
EFM5	mRNA	748	44.14	31	68.9849
FLC1	mRNA	2381	55.26	31	68.9849
TUP1	mRNA	2141	49.65	31	68.9849
VAC8	mRNA	1736	57.09	31	68.9849
ERV2	mRNA	590	52.58	31	68.9849
PET309	mRNA	2897	50.78	31	68.9849
TMA22	mRNA	596	43.33	31	68.9849
ISN1	mRNA	1352	41	31	68.9849
CCS1	mRNA	749	30.07	31	68.9849
TED1	mRNA	1421	40.25	31	68.9849
SVL3	mRNA	2477	44.37	31	68.9849
FCF2	mRNA	653	40.765	30	66.7595
PEX19	mRNA	1028	63.16	30	66.7595
RHO2	mRNA	578	43.2	30	66.7595
TFG1	mRNA	2207	44.365	30	66.7595
PMU1	mRNA	887	43.515	30	66.7595
ARX1	mRNA	1781	36	30	66.7595
SRP68	mRNA	1799	44.29	30	66.7595
NAP1	mRNA	1253	41.9	30	66.7595
NNT1	mRNA	785	44.53	30	66.7595
VTA1	mRNA	992	52.835	30	66.7595
AIM7	mRNA	449	53.095	30	66.7595
RPL4A	mRNA	1088	48.83	30	66.7595
YRB2	mRNA	983	42.33	30	66.7595
CRM1	mRNA	3254	44.085	30	66.7595
ECT1	mRNA	971	47.305	30	66.7595
ISU1	mRNA	497	61.715	30	66.7595
MNN11	mRNA	1268	61.195	30	66.7595
SLG1	mRNA	1136	44.59	30	66.7595
FIG2	mRNA	4829	56.595	30	66.7595
CHS1	mRNA	3395	49.26	30	66.7595
VMA6	mRNA	1037	62.72	30	66.7595
RRP45	mRNA	917	37.83	30	66.7595
CYC1	mRNA	329	47.355	30	66.7595
RHO5	mRNA	995	36.24	29	64.5342
ORM2	mRNA	650	48.41	29	64.5342
RIE1	mRNA	2345	50.8	29	64.5342
GDB1	mRNA	4610	44.19	29	64.5342
GID8	mRNA	1367	56.54	29	64.5342
HST1	mRNA	1511	55.39	29	64.5342
RHO3	mRNA	695	56.24	29	64.5342
AIM41	mRNA	557	38.36	29	64.5342
PCL1	mRNA	839	54.14	29	64.5342
CAR1	mRNA	1001	38.79	29	64.5342
PHS1	mRNA	653	48.72	29	64.5342
RPA190	mRNA	4994	50.47	29	64.5342
MNR2	mRNA	2909	53.6	29	64.5342
TFB5	mRNA	218	44.75	29	64.5342
RCK2	mRNA	1832	49.27	29	64.5342
GAS2	mRNA	1667	46.12	29	64.5342
STE4	mRNA	1271	41.34	29	64.5342
GAT2	mRNA	1682	62.42	29	64.5342
SPN1	mRNA	1232	39.33	29	64.5342
MNN10	mRNA	1181	54.63	29	64.5342
YGL242C	mRNA	545	35.36	29	64.5342
SRM1	mRNA	1448	37.19	29	64.5342
SEC21	mRNA	2807	42.46	29	64.5342
IPT1	mRNA	1583	52.03	29	64.5342
FES1	mRNA	872	44.88	29	64.5342
PLB2	mRNA	2120	46.155	28	62.3089
BSC2	mRNA	707	65.345	28	62.3089
EXP1	mRNA	449	38.045	28	62.3089
SFT2	mRNA	647	40.935	28	62.3089
MIC27	mRNA	704	43.475	28	62.3089
VHS2	mRNA	1310	48.45	28	62.3089
MSC3	mRNA	2186	52.84	28	62.3089
HUB1	mRNA	221	39.605	28	62.3089
SLA1	mRNA	3734	44.435	28	62.3089
ABP1	mRNA	1778	41.6	28	62.3089
SEH1	mRNA	1049	37.95	28	62.3089
SUS1	mRNA	292	51.08	28	62.3089
PLB1	mRNA	1994	53.935	28	62.3089
MRI1	mRNA	1235	43.585	28	62.3089
MNN2	mRNA	1793	41.945	28	62.3089
NOP15	mRNA	662	43.22	28	62.3089
CDC11	mRNA	1247	47.55	28	62.3089
GGA2	mRNA	1757	47.045	28	62.3089
UBA1	mRNA	3074	44.705	28	62.3089
HOT13	mRNA	350	38.025	28	62.3089
AIM24	mRNA	1184	41.325	28	62.3089
HNM1	mRNA	1691	47.965	28	62.3089
AAH1	mRNA	1043	38.395	28	62.3089
ERO1	mRNA	1691	42.775	28	62.3089
GCN1	mRNA	8018	42.775	28	62.3089
KRI1	mRNA	1775	36.57	28	62.3089
CUB1	mRNA	1655	42.7	28	62.3089
POL4	mRNA	1748	44.885	28	62.3089
YHR020W	mRNA	2066	37.43	28	62.3089
DCW1	mRNA	1349	52.34	28	62.3089
HEK2	mRNA	1145	45.055	28	62.3089
CSR1	mRNA	1226	58.15	28	62.3089
CYC8	mRNA	2900	48.13	28	62.3089
YMC2	mRNA	989	38.655	28	62.3089
PSP2	mRNA	1782	58.67	27	60.0836
RLP24	mRNA	599	64.46	27	60.0836
TVP23	mRNA	599	38.14	27	60.0836
MAG1	mRNA	890	64.7	27	60.0836
GCV1	mRNA	1202	48.68	27	60.0836
TPN1	mRNA	1739	43.14	27	60.0836
ERG26	mRNA	1049	36.89	27	60.0836
CAP2	mRNA	863	57.68	27	60.0836
YJR096W	mRNA	848	42.87	27	60.0836
CKA1	mRNA	1118	44.11	27	60.0836
SAC6	mRNA	1929	48.54	27	60.0836
YPS1	mRNA	1709	49.39	27	60.0836
VPS62	mRNA	1403	45.79	27	60.0836
SOL3	mRNA	749	38.48	27	60.0836
ADE1	mRNA	920	40.16	27	60.0836
YCK2	mRNA	1640	46.25	27	60.0836
YGR054W	mRNA	1928	53	27	60.0836
SHM1	mRNA	1472	37.52	27	60.0836
STI1	mRNA	1769	42.19	27	60.0836
PLB3	mRNA	2060	72.76	27	60.0836
VPS4	mRNA	1313	34.78	27	60.0836
CAJ1	mRNA	1175	37.21	27	60.0836
NCB2	mRNA	441	57.8	27	60.0836
GET2	mRNA	857	47.13	27	60.0836
ESF1	mRNA	1886	49.58	27	60.0836
VMA22	mRNA	545	33.46	27	60.0836
PRY3	mRNA	2645	59.21	27	60.0836
YRF1-7	mRNA	5580	56.39	27	60.0836
GAL80	mRNA	1307	44.22	27	60.0836
LSB1	mRNA	725	39.73	27	60.0836
TOM1	mRNA	9806	38.35	27	60.0836
YBR137W	mRNA	539	45.08	27	60.0836
CYT2	mRNA	674	53.72	27	60.0836
TMH18	mRNA	486	53.81	27	60.0836
ENV9	mRNA	992	38.94	27	60.0836
PGC1	mRNA	965	52.68	27	60.0836
HRK1	mRNA	2279	47.61	27	60.0836
GCS1	mRNA	1058	41.5	27	60.0836
MRP51	mRNA	1034	52.45	27	60.0836
PAM17	mRNA	593	40.655	26	57.8583
DID4	mRNA	699	39.545	26	57.8583
UME1	mRNA	1382	55.585	26	57.8583
DYN2	mRNA	280	37.735	26	57.8583
MSS116	mRNA	1994	51.595	26	57.8583
GLO2	mRNA	824	35.685	26	57.8583
CPR2	mRNA	617	43.045	26	57.8583
ZRT3	mRNA	1511	40.315	26	57.8583
NNR1	mRNA	740	48.205	26	57.8583
BCH1	mRNA	2174	38.565	26	57.8583
CIR1	mRNA	785	41.63	26	57.8583
SLA2	mRNA	2906	56.025	26	57.8583
PAR32	mRNA	887	42.495	26	57.8583
SAC1	mRNA	1871	34.1	26	57.8583
SUP35	mRNA	2057	42.44	26	57.8583
RAM2	mRNA	950	47.06	26	57.8583
PEX34	mRNA	434	50.785	26	57.8583
PRT1	mRNA	2291	36.585	26	57.8583
RRT8	mRNA	1029	40.365	26	57.8583
COQ6	mRNA	1439	49.135	26	57.8583
NCP1	mRNA	2075	32.63	26	57.8583
SME1	mRNA	284	48.705	26	57.8583
CHZ1	mRNA	461	35.305	26	57.8583
GRX3	mRNA	752	40.33	26	57.8583
EMC5	mRNA	425	44.85	26	57.8583
RPN10	mRNA	806	25.265	26	57.8583
YOR342C	mRNA	959	50.98	26	57.8583
RPA12	mRNA	377	41.325	26	57.8583
HRD1	mRNA	1655	42.075	26	57.8583
GRH1	mRNA	1118	41.96	26	57.8583
SEC17	mRNA	879	45.145	26	57.8583
TIF4631	mRNA	2858	48.395	26	57.8583
HOS4	mRNA	3251	61.065	26	57.8583
YMR226C	mRNA	803	37.285	26	57.8583
GIM4	mRNA	336	57.67	26	57.8583
DBP3	mRNA	1571	35.435	26	57.8583
SNX3	mRNA	488	52.81	26	57.8583
TEF2	mRNA	1376	47.41	26	57.8583
WWM1	mRNA	635	35.15	26	57.8583
HIP1	mRNA	1811	50.67	26	57.8583
CYB5	mRNA	362	44.115	26	57.8583
SEC22	mRNA	644	37.395	26	57.8583
SEC26	mRNA	2921	52.845	26	57.8583
SEC27	mRNA	2670	40.31	26	57.8583
YML018C	mRNA	1181	50.53	26	57.8583
SEC9	mRNA	1955	38.21	26	57.8583
ERJ5	mRNA	887	52.885	26	57.8583
RFC1	mRNA	2585	34.205	26	57.8583
XRN1	mRNA	4586	42.02	26	57.8583
MOT3	mRNA	1472	49.135	26	57.8583
AUR1	mRNA	1205	55.475	26	57.8583
PPH21	mRNA	1109	39.39	26	57.8583
ERV41	mRNA	1059	42.49	26	57.8583
CLU1	mRNA	3833	41.1	25	55.6329
IKI3	mRNA	4049	41.81	25	55.6329
PAM16	mRNA	449	51.61	25	55.6329
EST3	mRNA	546	66.08	25	55.6329
VTI1	mRNA	653	43.79	25	55.6329
ABP140	mRNA	1887	31.23	25	55.6329
MRPL39	mRNA	212	39.05	25	55.6329
UIP3	mRNA	707	57.08	25	55.6329
SKG1	mRNA	1067	43.87	25	55.6329
SCD6	mRNA	1049	45.43	25	55.6329
BTN2	mRNA	1232	47.22	25	55.6329
AVT1	mRNA	1808	41.15	25	55.6329
DIB1	mRNA	431	45.74	25	55.6329
VIP1	mRNA	3440	49.52	25	55.6329
MRPS9	mRNA	836	49.14	25	55.6329
CAN1	mRNA	1772	52.21	25	55.6329
ALO1	mRNA	1580	41.09	25	55.6329
HFD1	mRNA	1598	45.71	25	55.6329
RRP5	mRNA	5189	43.14	25	55.6329
COG6	mRNA	2519	46.09	25	55.6329
YPI1	mRNA	467	51.55	25	55.6329
HAP1	mRNA	4508	51	25	55.6329
PNO1	mRNA	824	50.92	25	55.6329
DAD4	mRNA	218	60.52	25	55.6329
SFA1	mRNA	1160	41.72	25	55.6329
YHR138C	mRNA	344	52.4	25	55.6329
MIS1	mRNA	2927	36.54	25	55.6329
RBL2	mRNA	320	42.7	25	55.6329
MAK11	mRNA	1406	40.11	25	55.6329
RPT3	mRNA	1286	34.83	25	55.6329
RVS167	mRNA	1448	50.19	25	55.6329
AKR1	mRNA	2294	44.09	25	55.6329
OAC1	mRNA	974	49	25	55.6329
PUS7	mRNA	2030	37.62	25	55.6329
VPS17	mRNA	1655	43.7	25	55.6329
RRP7	mRNA	893	43.61	25	55.6329
NOC2	mRNA	2132	46.08	25	55.6329
RPC11	mRNA	332	44.33	25	55.6329
CLN1	mRNA	1640	61.87	25	55.6329
TPA1	mRNA	1934	44.85	25	55.6329
DBP9	mRNA	1784	46.39	25	55.6329
MRPL20	mRNA	587	51.61	25	55.6329
PAT1	mRNA	2390	68.46	25	55.6329
RAD14	mRNA	1116	45.64	25	55.6329
NVJ2	mRNA	2312	52.62	25	55.6329
HEM12	mRNA	1088	38.4	25	55.6329
DUF1	mRNA	3350	43.54	25	55.6329
LSO2	mRNA	278	52.435	24	53.4076
BUD20	mRNA	500	40.07	24	53.4076
DID2	mRNA	614	35.495	24	53.4076
SHE10	mRNA	1733	51.42	24	53.4076
MSB2	mRNA	3920	80.39	24	53.4076
ENT3	mRNA	1226	43.185	24	53.4076
NAB2	mRNA	1577	47.21	24	53.4076
FMP46	mRNA	401	64.39	24	53.4076
MET2	mRNA	1460	46.35	24	53.4076
MET3	mRNA	1535	38.105	24	53.4076
CSM1	mRNA	572	40.99	24	53.4076
MEX67	mRNA	1799	52.425	24	53.4076
RDS3	mRNA	323	41.56	24	53.4076
YBL028C	mRNA	320	53.795	24	53.4076
WHI2	mRNA	1460	47.75	24	53.4076
SYG1	mRNA	2708	48.1	24	53.4076
LIP5	mRNA	1244	54.355	24	53.4076
MIC12	mRNA	320	48.365	24	53.4076
AME1	mRNA	974	50.065	24	53.4076
EMP47	mRNA	1337	51.21	24	53.4076
PEP12	mRNA	866	44.58	24	53.4076
BNA3	mRNA	1334	46.65	24	53.4076
YPR011C	mRNA	980	48.045	24	53.4076
MAK3	mRNA	530	38.295	24	53.4076
VPS25	mRNA	608	44.835	24	53.4076
PMC1	mRNA	3521	44.035	24	53.4076
SSO1	mRNA	872	47.525	24	53.4076
AIM9	mRNA	1883	47.585	24	53.4076
AIM6	mRNA	1172	44.765	24	53.4076
FRA1	mRNA	2249	47.2	24	53.4076
SAM3	mRNA	1763	40.785	24	53.4076
GPI11	mRNA	659	45.96	24	53.4076
TIM50	mRNA	1430	36.975	24	53.4076
CHC1	mRNA	4961	55.22	24	53.4076
MDY2	mRNA	638	49.985	24	53.4076
RME1	mRNA	902	40.155	24	53.4076
CAF16	mRNA	869	46.665	24	53.4076
MRPS16	mRNA	365	37.635	24	53.4076
COQ2	mRNA	1118	50.165	24	53.4076
YPF1	mRNA	1763	65.28	24	53.4076
PSE1	mRNA	3269	47.01	24	53.4076
ATP11	mRNA	956	44.76	23	51.1823
CPR4	mRNA	956	56.75	23	51.1823
RET2	mRNA	1640	50.11	23	51.1823
SPC3	mRNA	554	47.04	23	51.1823
SLC1	mRNA	911	54.63	23	51.1823
KRE28	mRNA	1157	51.23	23	51.1823
RSM27	mRNA	332	36.1	23	51.1823
RRS1	mRNA	611	46.84	23	51.1823
FAU1	mRNA	635	42.63	23	51.1823
PPN1	mRNA	2024	47.76	23	51.1823
HAA1	mRNA	2084	46.25	23	51.1823
MXR2	mRNA	506	38.54	23	51.1823
DDR2	mRNA	185	68.7	23	51.1823
MAF1	mRNA	1188	53.78	23	51.1823
VPS70	mRNA	2435	51.24	23	51.1823
ELP2	mRNA	2366	42.37	23	51.1823
NCE103	mRNA	665	59.59	23	51.1823
COS8	mRNA	1145	42.71	23	51.1823
MNN9	mRNA	1187	50.31	23	51.1823
MNN5	mRNA	1760	37.65	23	51.1823
PRP43	mRNA	2303	34.23	23	51.1823
SAS10	mRNA	1832	36.56	23	51.1823
APM4	mRNA	1475	48.59	23	51.1823
ODC2	mRNA	923	40.62	23	51.1823
PWP1	mRNA	1730	36.59	23	51.1823
YOR131C	mRNA	656	43.57	23	51.1823
GIR2	mRNA	797	31.84	23	51.1823
PGS1	mRNA	1565	44.96	23	51.1823
APL2	mRNA	2180	47.11	23	51.1823
CLB1	mRNA	1415	51.79	23	51.1823
TIM23	mRNA	668	42.48	23	51.1823
GRX6	mRNA	695	41.52	23	51.1823
AGA2	mRNA	263	59.67	23	51.1823
POP8	mRNA	402	36.04	23	51.1823
SMX3	mRNA	260	38	23	51.1823
KGD1	mRNA	3044	58.71	23	51.1823
GPI1	mRNA	1829	47.44	23	51.1823
PRO2	mRNA	1370	39	23	51.1823
APP1	mRNA	1763	52.14	23	51.1823
CDC55	mRNA	1580	60.96	23	51.1823
YRA2	mRNA	611	44.6	23	51.1823
MTC1	mRNA	1436	40.23	23	51.1823
ACH1	mRNA	1580	47.12	23	51.1823
URA8	mRNA	1736	50.12	23	51.1823
FDC1	mRNA	1511	53.71	23	51.1823
MRP1	mRNA	965	53.46	23	51.1823
GIM5	mRNA	492	35.27	23	51.1823
PHO91	mRNA	2684	39.17	23	51.1823
DOM34	mRNA	1160	42.31	23	51.1823
IDP1	mRNA	1286	64.32	23	51.1823
HSL1	mRNA	4556	36.04	23	51.1823
RDL2	mRNA	449	37.37	23	51.1823
MMR1	mRNA	1475	50.1	23	51.1823
MRP8	mRNA	659	43.02	23	51.1823
YJU3	mRNA	941	38.73	23	51.1823
PCI8	mRNA	1334	47.5	23	51.1823
SPC1	mRNA	284	57.54	23	51.1823
YDL012C	mRNA	324	53.74	23	51.1823
DLD2	mRNA	1592	49.9	22	48.957
MEP3	mRNA	1469	50.82	22	48.957
RFC2	mRNA	1061	32.055	22	48.957
TOS3	mRNA	1682	61.45	22	48.957
MTC4	mRNA	2084	61.28	22	48.957
DSE4	mRNA	3353	47.825	22	48.957
MRPL27	mRNA	440	48.465	22	48.957
TRX3	mRNA	383	51.08	22	48.957
MRPL6	mRNA	644	45.58	22	48.957
MRX14	mRNA	317	45.775	22	48.957
LYS20	mRNA	1286	45.47	22	48.957
SPO12	mRNA	521	52.095	22	48.957
PCM1	mRNA	1673	41.155	22	48.957
MET5	mRNA	4328	59.245	22	48.957
MRPL19	mRNA	476	38.035	22	48.957
RRP14	mRNA	1304	37.01	22	48.957
SPF1	mRNA	3647	45.675	22	48.957
PCS60	mRNA	1631	57.6	22	48.957
VPS45	mRNA	1733	48.01	22	48.957
PSR2	mRNA	1193	41.095	22	48.957
KRE6	mRNA	2162	55.5	22	48.957
COA6	mRNA	314	51.43	22	48.957
DRS1	mRNA	2258	45.03	22	48.957
CDC36	mRNA	575	42.075	22	48.957
CTT1	mRNA	1688	57.83	22	48.957
STV1	mRNA	2672	44.62	22	48.957
RSP5	mRNA	2429	64.185	22	48.957
YPR1	mRNA	938	44.86	22	48.957
HRT1	mRNA	365	50.14	22	48.957
GPI16	mRNA	1832	41.135	22	48.957
NFS1	mRNA	1493	53.56	22	48.957
TIM13	mRNA	317	44.245	22	48.957
RTS1	mRNA	2273	35.375	22	48.957
STE23	mRNA	3083	40.835	22	48.957
TAF9	mRNA	473	46.11	22	48.957
RPA43	mRNA	980	37.735	22	48.957
PHO81	mRNA	3536	50.365	22	48.957
UGA2	mRNA	1493	60.035	22	48.957
YJR142W	mRNA	1028	38.165	22	48.957
YPD1	mRNA	503	38.37	22	48.957
ICE2	mRNA	1475	65.075	22	48.957
CAT5	mRNA	701	44.35	22	48.957
RCR1	mRNA	641	52.8	22	48.957
PRP42	mRNA	1634	49.695	22	48.957
GCD1	mRNA	1736	34.12	22	48.957
RKI1	mRNA	776	40.005	22	48.957
HRR25	mRNA	1484	47.6	22	48.957
DIG1	mRNA	1358	48.22	21	46.7317
SPB1	mRNA	2525	26.27	21	46.7317
BUD25	mRNA	462	45.36	21	46.7317
LTP1	mRNA	485	41.35	21	46.7317
PDE2	mRNA	1580	52.6	21	46.7317
KTR6	mRNA	1340	52.87	21	46.7317
FLC2	mRNA	2351	49.54	21	46.7317
PER1	mRNA	1073	62.63	21	46.7317
ISD11	mRNA	284	57.19	21	46.7317
SOL4	mRNA	767	37.92	21	46.7317
GPA1	mRNA	1418	58.21	21	46.7317
MRPL23	mRNA	491	51.21	21	46.7317
MRPL22	mRNA	929	56.54	21	46.7317
DTD1	mRNA	453	42.36	21	46.7317
FPY1	mRNA	824	42.68	21	46.7317
BNI1	mRNA	5861	41.88	21	46.7317
SMF3	mRNA	1421	53.87	21	46.7317
BMS1	mRNA	3551	30.77	21	46.7317
RXT3	mRNA	884	51.61	21	46.7317
PRM5	mRNA	956	55.66	21	46.7317
TPO5	mRNA	1856	40.17	21	46.7317
PEP1	mRNA	4739	47.5	21	46.7317
UFO1	mRNA	2006	63.15	21	46.7317
TDA3	mRNA	1571	51.56	21	46.7317
TRM82	mRNA	1334	37.81	21	46.7317
RSM19	mRNA	275	50.61	21	46.7317
COA3	mRNA	257	47.12	21	46.7317
NHA1	mRNA	2957	37.96	21	46.7317
MAE1	mRNA	2009	37.59	21	46.7317
FUN14	mRNA	596	38	21	46.7317
NIT3	mRNA	875	44.4	21	46.7317
SSK2	mRNA	4739	38.71	21	46.7317
DIP2	mRNA	2831	49.23	21	46.7317
APL5	mRNA	2798	49.62	21	46.7317
MRP21	mRNA	533	59.81	21	46.7317
LST4	mRNA	2486	59.6	21	46.7317
EMC3	mRNA	761	48.37	21	46.7317
ADP1	mRNA	3149	60.8	21	46.7317
COA1	mRNA	593	49.29	21	46.7317
DLS1	mRNA	503	41.5	21	46.7317
NRD1	mRNA	1727	62.6	21	46.7317
SCS22	mRNA	528	36.45	21	46.7317
MDG1	mRNA	1100	49.06	21	46.7317
PRS2	mRNA	956	53.25	21	46.7317
URE2	mRNA	1064	35.44	21	46.7317
GIC2	mRNA	1151	67.96	21	46.7317
SFB3	mRNA	2789	50.48	21	46.7317
PIN4	mRNA	2006	48.1	21	46.7317
YIP1	mRNA	746	48.62	21	46.7317
ESS1	mRNA	512	42.16	21	46.7317
SDO1	mRNA	752	47.71	21	46.7317
NHX1	mRNA	1901	34.17	21	46.7317
ASP1	mRNA	1145	38.45	21	46.7317
SIC1	mRNA	854	53.74	21	46.7317
GDH2	mRNA	3278	62.39	21	46.7317
LSM4	mRNA	563	39.16	21	46.7317
IES6	mRNA	500	45.77	21	46.7317
NOP14	mRNA	2432	39.95	21	46.7317
TYW1	mRNA	2432	38	21	46.7317
NRG2	mRNA	662	41.33	21	46.7317
GSH1	mRNA	2036	59.96	21	46.7317
NHP10	mRNA	611	48.74	21	46.7317
CPS1	mRNA	1730	70.68	21	46.7317
YLF2	mRNA	1217	48.23	21	46.7317
MRPL9	mRNA	809	35.89	21	46.7317
SNF4	mRNA	968	42.87	21	46.7317
ITR2	mRNA	1829	58.43	20	44.5064
IOC4	mRNA	1427	45.27	20	44.5064
CWH41	mRNA	2501	37.445	20	44.5064
EDC2	mRNA	437	68.175	20	44.5064
PDX1	mRNA	1232	47.225	20	44.5064
MED2	mRNA	1295	54.97	20	44.5064
ENT1	mRNA	1364	40.99	20	44.5064
SUC2	mRNA	1598	62.615	20	44.5064
ECM1	mRNA	638	45.965	20	44.5064
GCD6	mRNA	2138	48.42	20	44.5064
MIM2	mRNA	263	32.78	20	44.5064
TWF1	mRNA	998	50.24	20	44.5064
TMA16	mRNA	536	47.57	20	44.5064
SCM4	mRNA	563	69.63	20	44.5064
INP51	mRNA	2840	45.52	20	44.5064
GPM2	mRNA	935	43.84	20	44.5064
RTG2	mRNA	1766	36.835	20	44.5064
SIN3	mRNA	4610	41.33	20	44.5064
SKP1	mRNA	584	60.725	20	44.5064
APM1	mRNA	1427	42.88	20	44.5064
NOG1	mRNA	1943	51.515	20	44.5064
DCS2	mRNA	1061	33.985	20	44.5064
DMA1	mRNA	1250	40.575	20	44.5064
JSN1	mRNA	3275	60.71	20	44.5064
RAD33	mRNA	533	48.03	20	44.5064
SUR1	mRNA	1148	48.88	20	44.5064
RAD27	mRNA	1148	35.695	20	44.5064
CPT1	mRNA	1182	47.31	20	44.5064
DIM1	mRNA	956	39.79	20	44.5064
POP6	mRNA	476	53.625	20	44.5064
PUT2	mRNA	1727	54.825	20	44.5064
DGK1	mRNA	872	44.225	20	44.5064
TOA1	mRNA	860	35.045	20	44.5064
SVP26	mRNA	686	60.375	20	44.5064
SXM1	mRNA	2834	35.145	20	44.5064
GPI8	mRNA	1235	82.015	20	44.5064
SEC62	mRNA	824	41.565	20	44.5064
RML2	mRNA	1181	57.185	20	44.5064
CAF40	mRNA	1121	44.815	20	44.5064
AIM2	mRNA	740	37.97	20	44.5064
GCN3	mRNA	917	56.87	20	44.5064
COQ9	mRNA	782	37.59	20	44.5064
OCH1	mRNA	1442	49.755	20	44.5064
IRA1	mRNA	9278	50.85	20	44.5064
YOR1	mRNA	4433	45.055	20	44.5064
YPC1	mRNA	950	53.185	20	44.5064
SPT16	mRNA	3107	34.52	20	44.5064
RFA1	mRNA	1865	43.415	20	44.5064
CYR1	mRNA	6080	45.7	20	44.5064
TPK1	mRNA	1193	56.255	20	44.5064
PKH2	mRNA	3245	44.28	20	44.5064
RAD6	mRNA	518	41.21	20	44.5064
BUG1	mRNA	1025	44.91	20	44.5064
HSP78	mRNA	2435	40.755	20	44.5064
SEC31	mRNA	3821	52.985	20	44.5064
MYO4	mRNA	4415	42.25	20	44.5064
ALG2	mRNA	1511	63	20	44.5064
PHO89	mRNA	1724	50.63	20	44.5064
GCN20	mRNA	2258	44.675	20	44.5064
MET12	mRNA	1973	36.32	20	44.5064
LOA1	mRNA	902	51.98	20	44.5064
SCJ1	mRNA	1133	53.415	20	44.5064
IGD1	mRNA	587	57.045	20	44.5064
TMS1	mRNA	1421	50.045	20	44.5064
BIO2	mRNA	1127	51.975	20	44.5064
STO1	mRNA	2586	37.66	20	44.5064
ORM1	mRNA	668	63.74	19	42.281
STE24	mRNA	1361	42.32	19	42.281
MRPL36	mRNA	533	52.26	19	42.281
NUP85	mRNA	2234	42.09	19	42.281
SUB1	mRNA	878	38	19	42.281
BXI1	mRNA	893	47.91	19	42.281
HPF1	mRNA	2903	51.29	19	42.281
AVT7	mRNA	1472	48	19	42.281
MLF3	mRNA	1358	50.58	19	42.281
BRE4	mRNA	3377	68.42	19	42.281
NSA2	mRNA	785	49.77	19	42.281
EMI1	mRNA	563	44.34	19	42.281
RTF1	mRNA	1676	30.12	19	42.281
VID27	mRNA	2348	40.85	19	42.281
MGL2	mRNA	1349	52.35	19	42.281
NCL1	mRNA	2054	37.44	19	42.281
NEO1	mRNA	3455	48.59	19	42.281
ADE8	mRNA	644	51.95	19	42.281
LAP3	mRNA	1364	37.64	19	42.281
SPP41	mRNA	4307	36.07	19	42.281
ATG19	mRNA	1247	48.36	19	42.281
NAB3	mRNA	2408	50	19	42.281
DPP1	mRNA	869	45.67	19	42.281
MRPS17	mRNA	713	54.09	19	42.281
GTS1	mRNA	1190	37.39	19	42.281
PCP1	mRNA	1040	39.61	19	42.281
COQ1	mRNA	1421	39.67	19	42.281
MTH1	mRNA	1301	78.91	19	42.281
GRX7	mRNA	611	44.37	19	42.281
IRC7	mRNA	1022	42.04	19	42.281
RSN1	mRNA	2861	47.5	19	42.281
YNL134C	mRNA	1130	48.58	19	42.281
TSC11	mRNA	4292	54.41	19	42.281
DCS1	mRNA	1052	41.64	19	42.281
YNL122C	mRNA	347	42.95	19	42.281
PBP1	mRNA	2168	36.21	19	42.281
ARO7	mRNA	770	36.61	19	42.281
MDM20	mRNA	2390	51	19	42.281
TOP1	mRNA	2309	41.95	19	42.281
PAN3	mRNA	2039	42.74	19	42.281
MRS6	mRNA	1811	45.96	19	42.281
OPI1	mRNA	1214	43.57	19	42.281
RTC3	mRNA	335	51.14	19	42.281
SDA1	mRNA	2303	31.28	19	42.281
COT1	mRNA	1319	53.39	19	42.281
SEC18	mRNA	2276	52	19	42.281
TIF4632	mRNA	2744	49.76	19	42.281
HFL1	mRNA	1256	42.2	19	42.281
TIR3	mRNA	809	56.37	19	42.281
AVL9	mRNA	2294	34.21	19	42.281
FET4	mRNA	1658	60.41	19	42.281
GYP1	mRNA	1913	63.2	19	42.281
DRE2	mRNA	1046	39.3	19	42.281
ARP5	mRNA	2267	35.85	19	42.281
NAT2	mRNA	866	57.59	19	42.281
MGR2	mRNA	341	43.56	19	42.281
SMI1	mRNA	1517	44.04	19	42.281
ASM4	mRNA	1586	50.58	19	42.281
BNI5	mRNA	1346	38.6	19	42.281
NIF3	mRNA	866	29.03	19	42.281
MET18	mRNA	3098	47.83	19	42.281
SEC7	mRNA	6029	47.2	19	42.281
CDS1	mRNA	1373	57.22	19	42.281
SSE2	mRNA	2081	46.64	19	42.281
CSC1	mRNA	2348	46.5	19	42.281
RRP43	mRNA	1184	35.65	19	42.281
NET1	mRNA	3569	37.71	19	42.281
RCR2	mRNA	632	54.37	19	42.281
PIB2	mRNA	1907	43.62	19	42.281
UTP30	mRNA	824	44.32	19	42.281
MRM2	mRNA	962	56.62	19	42.281
ALG6	mRNA	1634	40.6	19	42.281
KEX2	mRNA	2444	42.17	19	42.281
UTP7	mRNA	1664	34.65	19	42.281
UTP9	mRNA	1727	47.37	19	42.281
SNT1	mRNA	3680	44.48	19	42.281
CMS1	mRNA	875	49.16	19	42.281
REX2	mRNA	809	47.96	19	42.281
PET8	mRNA	854	55.87	19	42.281
PKC1	mRNA	3455	48.28	18	40.0557
DSE1	mRNA	1721	64.765	18	40.0557
TSC10	mRNA	962	49.82	18	40.0557
UTP20	mRNA	7481	40.615	18	40.0557
RAV2	mRNA	1055	60.615	18	40.0557
OSW7	mRNA	1532	52.15	18	40.0557
GNT1	mRNA	1475	38.415	18	40.0557
VHR2	mRNA	1517	60.885	18	40.0557
RPL15B	mRNA	614	48.025	18	40.0557
MTR2	mRNA	568	43.405	18	40.0557
UFD2	mRNA	2885	46.66	18	40.0557
UFD4	mRNA	4451	55.57	18	40.0557
HAM1	mRNA	593	43.485	18	40.0557
UTP15	mRNA	1541	48.42	18	40.0557
NCE101	mRNA	162	46.57	18	40.0557
SMF1	mRNA	1727	47.595	18	40.0557
ZPR1	mRNA	1460	46.045	18	40.0557
DJP1	mRNA	1298	43.02	18	40.0557
EFG1	mRNA	701	41.92	18	40.0557
GRE3	mRNA	983	51.785	18	40.0557
TVP38	mRNA	1013	50.445	18	40.0557
YBL029C-A	mRNA	284	59.235	18	40.0557
ERG27	mRNA	1043	35.44	18	40.0557
PRP38	mRNA	728	47.905	18	40.0557
SLM2	mRNA	1970	49.675	18	40.0557
BRE1	mRNA	2102	47.015	18	40.0557
MRPL10	mRNA	968	49.135	18	40.0557
SEY1	mRNA	2330	61.21	18	40.0557
MSN2	mRNA	2114	47.97	18	40.0557
LAP2	mRNA	2015	58.125	18	40.0557
SDH8	mRNA	416	61.985	18	40.0557
BBC1	mRNA	3473	46.6	18	40.0557
YVC1	mRNA	2027	39.175	18	40.0557
TRM112	mRNA	407	55.855	18	40.0557
UBC9	mRNA	474	52.745	18	40.0557
RRP15	mRNA	752	61.685	18	40.0557
TIM44	mRNA	1295	37.825	18	40.0557
TGL1	mRNA	1646	47.49	18	40.0557
TRP2	mRNA	1523	33.95	18	40.0557
UBP1	mRNA	2429	44.635	18	40.0557
MNN1	mRNA	2288	47.085	18	40.0557
ODC1	mRNA	932	41.515	18	40.0557
YAP1801	mRNA	1913	40.045	18	40.0557
DAK1	mRNA	1754	39.8	18	40.0557
PFK27	mRNA	1193	59.675	18	40.0557
OPY1	mRNA	986	42.46	18	40.0557
FPS1	mRNA	2009	48.68	18	40.0557
PNS1	mRNA	1619	68.585	18	40.0557
CAB2	mRNA	1097	51.605	18	40.0557
GRX4	mRNA	734	52.64	18	40.0557
FMP32	mRNA	623	36.675	18	40.0557
GCD14	mRNA	1151	49.99	18	40.0557
PHD1	mRNA	1100	56.295	18	40.0557
TPK2	mRNA	1142	58.305	18	40.0557
ASI1	mRNA	1874	48.25	18	40.0557
STE7	mRNA	1547	43.07	18	40.0557
LRO1	mRNA	1985	24.5	18	40.0557
TRR2	mRNA	1028	54.705	18	40.0557
SIA1	mRNA	1868	53.48	18	40.0557
TAM41	mRNA	1157	64.3	18	40.0557
OXA1	mRNA	1208	56.075	18	40.0557
URA2	mRNA	6710	40.36	18	40.0557
GTF1	mRNA	551	55.905	18	40.0557
MTR4	mRNA	3221	36.35	18	40.0557
CDC53	mRNA	2447	26.28	18	40.0557
NST1	mRNA	3722	41.64	18	40.0557
TUM1	mRNA	914	50.475	18	40.0557
VRP1	mRNA	2453	57.695	18	40.0557
SFH5	mRNA	884	37.62	18	40.0557
RTN2	mRNA	1181	79.555	18	40.0557
MDJ1	mRNA	1535	39.195	18	40.0557
ALG9	mRNA	1667	45.86	18	40.0557
KTR3	mRNA	1214	33.06	18	40.0557
GLE2	mRNA	1097	45.055	18	40.0557
DPL1	mRNA	1769	59.375	18	40.0557
SSD1	mRNA	3752	61.685	18	40.0557
BTS1	mRNA	1007	51.875	18	40.0557
YKR018C	mRNA	2177	43.31	18	40.0557
CRN1	mRNA	1955	61.075	18	40.0557
CAX4	mRNA	719	55.31	18	40.0557
SYN8	mRNA	767	53.53	18	40.0557
KEI1	mRNA	666	41.145	18	40.0557
MRPS8	mRNA	467	42.6	18	40.0557
APE1	mRNA	1544	46.865	18	40.0557
NAM9	mRNA	1460	50.95	18	40.0557
SPC2	mRNA	536	45.28	18	40.0557
CPA2	mRNA	3356	43.495	18	40.0557
COY1	mRNA	2039	55.74	18	40.0557
AHK1	mRNA	2954	62.535	18	40.0557
LDH1	mRNA	1127	35.285	18	40.0557
RUP1	mRNA	2015	48.79	17	37.8304
ERP4	mRNA	623	42.62	17	37.8304
YBR016W	mRNA	386	54.1	17	37.8304
ANB1	mRNA	473	50.27	17	37.8304
CSS2	mRNA	698	54.58	17	37.8304
LCB4	mRNA	1874	54.19	17	37.8304
BUD16	mRNA	938	43.56	17	37.8304
CCC1	mRNA	968	54.78	17	37.8304
OST6	mRNA	998	49.75	17	37.8304
ATG8	mRNA	353	52.24	17	37.8304
[truncated: 3,044 more rows]

## Sheet: PolyA_PolyI_2
Feature name	Feature type	Feature length	Feature median tail length	number of reads	RPM
tA_28UGC_29O	tRNA	72	44.865	2	10.0163
tE_28UUC_29J	tRNA	71	34.33	2	10.0163
tV_28AAC_29O	tRNA	73	43.48	1	5.00816
CDC65	tRNA	71	30.27	1	5.00816
tP_28UGG_29O1	tRNA	72	73.44	1	5.00816
tL_28CAA_29G1	tRNA	82	67.09	1	5.00816
tA_28AGC_29P	tRNA	72	59.73	1	5.00816
tH_28GUG_29E2	tRNA	71	55.15	1	5.00816
tD_28GUC_29M	tRNA	71	118.86	1	5.00816
tD_28GUC_29N	tRNA	70	130.31	1	5.00816
tD_28GUC_29O	tRNA	71	186.77	1	5.00816
SUF1	tRNA	71	37.19	1	5.00816
EMT2	tRNA	72	27.87	1	5.00816
gag-pol_20fusion_20protein	transposable_element	217730	33.46	532	2664.34
gag_20protein	transposable_element	53095	38.08	61	305.498
YOR343C-B	transposable_element	5313	35.655	38	190.31
TLC1	telomerase_RNA	1300	52.885	10	50.0816
SNR19	snRNA	567	44.63	38	190.31
LSR1	snRNA	1174	25.32	16	80.1306
SNR24	snoRNA	88	32.26	244	1221.99
SNR39	snoRNA	88	36	129	646.053
SNR18	snoRNA	101	39.055	124	621.012
SNR44	snoRNA	210	37.54	112	560.914
SNR59	snoRNA	77	34.855	100	500.816
SNR38	snoRNA	94	40.49	80	400.653
SNR191	snoRNA	273	57.85	21	105.171
SNR43	snoRNA	208	39.23	17	85.1388
SNR63	snoRNA	254	63.97	14	70.1143
SNR4	snoRNA	185	37.96	11	55.0898
SNR84	snoRNA	549	29.435	10	50.0816
SNR9	snoRNA	186	35.03	5	25.0408
SNR37	snoRNA	385	38.48	5	25.0408
SNR33	snoRNA	182	112.12	4	20.0327
SNR32	snoRNA	187	39.445	4	20.0327
SNR82	snoRNA	267	33.29	3	15.0245
SNR3	snoRNA	193	24.64	3	15.0245
SNR34	snoRNA	202	48.7	3	15.0245
SNR11	snoRNA	257	111.795	2	10.0163
SNR49	snoRNA	164	347.3	2	10.0163
SNR56	snoRNA	87	126.52	2	10.0163
SNR45	snoRNA	171	48.74	2	10.0163
SNR47	snoRNA	98	66.93	2	10.0163
SNR42	snoRNA	350	74.68	2	10.0163
SNR40	snoRNA	96	13.1	2	10.0163
SNR17B	snoRNA	332	48.975	2	10.0163
SNR30	snoRNA	605	111.145	2	10.0163
SNR81	snoRNA	200	43.75	1	5.00816
SNR8	snoRNA	189	99.03	1	5.00816
SNR190	snoRNA	189	292.65	1	5.00816
SNR75	snoRNA	88	83.62	1	5.00816
SNR62	snoRNA	99	26.81	1	5.00816
SNR58	snoRNA	95	78.95	1	5.00816
SNR41	snoRNA	94	113.96	1	5.00816
SNR72	snoRNA	97	52.47	1	5.00816
SNR67	snoRNA	81	52.71	1	5.00816
SNR61	snoRNA	89	43.71	1	5.00816
SNR83	snoRNA	305	98.03	1	5.00816
SNR86	snoRNA	1003	34.56	1	5.00816
SNR13	snoRNA	123	41.79	1	5.00816
SNR17A	snoRNA	333	44.61	1	5.00816
SNR36	snoRNA	181	115.96	1	5.00816
SNR35	snoRNA	203	68.13	1	5.00816
SNR31	snoRNA	224	432.78	1	5.00816
SNR128	snoRNA	125	28.19	1	5.00816
SNR70	snoRNA	163	27.15	1	5.00816
RDN25-2	rRNA	3395	23.87	47304	236906
RDN18-2	rRNA	1799	15.56	33660	168575
RDN58-2	rRNA	157	38.17	1563	7827.76
ETS1-2	rRNA	699	21.255	174	871.42
ITS1-2	rRNA	0	28.84	81	405.661
ITS2-2	rRNA	0	24.26	16	80.1306
NTS2-2	rRNA	1242	32.86	8	40.0653
RDN5-2	rRNA	118	51.68	8	40.0653
NTS2-1	rRNA	1242	12.385	4	20.0327
NTS1-2	rRNA	914	45.3	2	10.0163
RDN5-5	rRNA	118	29.86	1	5.00816
SCR1	ncRNA	521	36.37	103	515.841
RUF21	ncRNA	706	32.32	23	115.188
RUF20	ncRNA	442	30.03	18	90.1469
RUF22	ncRNA	514	24.05	1	5.00816
RUF5-2	ncRNA	709	64.29	1	5.00816
YLR162W	mRNA	356	33.06	10718	53677.5
TEF1	mRNA	1376	35.135	2644	13241.6
FBA1	mRNA	1079	37.875	1790	8964.61
TDH2	mRNA	998	39.59	1776	8894.5
ENO2	mRNA	1313	36.235	1758	8804.35
ADH1	mRNA	1046	39.885	1340	6710.94
PDC1	mRNA	1691	33.82	1262	6320.3
RPS12	mRNA	431	33.41	1004	5028.2
RPS6A	mRNA	711	35.28	874	4377.13
RPL25	mRNA	429	34.5	865	4332.06
RPS8B	mRNA	610	36.775	848	4246.92
PGK1	mRNA	1250	38.95	821	4111.7
CDC19	mRNA	1502	38.43	773	3871.31
TDH3	mRNA	998	37.135	758	3796.19
RPS31	mRNA	458	35.29	751	3761.13
CWP2	mRNA	278	48.21	718	3595.86
RPS25A	mRNA	342	41.155	698	3495.7
RPS5	mRNA	677	34.69	664	3325.42
RPL23B	mRNA	414	37.33	649	3250.3
TPI1	mRNA	746	42.19	647	3240.28
GPM1	mRNA	743	53.165	632	3165.16
CCW12	mRNA	401	54.52	616	3085.03
HOR7	mRNA	179	46.095	578	2894.72
RPL28	mRNA	450	29.75	534	2674.36
RPS24A	mRNA	408	34.38	534	2674.36
RPL10	mRNA	665	33.345	528	2644.31
RPL2B	mRNA	765	40.17	487	2438.98
RPL12B	mRNA	497	33.52	485	2428.96
RPL26B	mRNA	384	31.91	483	2418.94
RPS15	mRNA	428	42.455	482	2413.93
RPS1B	mRNA	767	30.54	475	2378.88
RPL18A	mRNA	561	32.525	468	2343.82
RPS23B	mRNA	438	31.78	465	2328.8
RPS23A	mRNA	438	30.98	462	2313.77
RPL36B	mRNA	303	35.23	439	2198.58
RPL2A	mRNA	765	34.93	437	2188.57
RPS1A	mRNA	767	40.24	436	2183.56
TMA19	mRNA	503	39.78	431	2158.52
RPS2	mRNA	764	32.62	427	2138.49
RPL33A	mRNA	324	38.645	420	2103.43
RPS4A	mRNA	786	32.335	414	2073.38
HXT6	mRNA	1712	51.225	404	2023.3
RPS16A	mRNA	432	34.085	390	1953.18
TSA1	mRNA	590	41.25	387	1938.16
RPS30A	mRNA	192	39.235	376	1883.07
RPL15A	mRNA	614	40.5	371	1858.03
RPL21A	mRNA	483	34.82	365	1827.98
RPL31A	mRNA	342	31.26	362	1812.96
RPS18B	mRNA	441	40.585	358	1792.92
RPS21A	mRNA	264	40.57	355	1777.9
ENO1	mRNA	1313	46.62	349	1747.85
RPL1A	mRNA	653	38.96	347	1737.83
RPL40A	mRNA	387	34.56	346	1732.82
GLN1	mRNA	1112	42.96	345	1727.82
RPL21B	mRNA	483	34.755	342	1712.79
HHT2	mRNA	410	40.74	341	1707.78
RPL35B	mRNA	363	34	331	1657.7
RPS0A	mRNA	759	38.44	331	1657.7
RPS10A	mRNA	318	48	329	1647.69
PMA1	mRNA	2756	52.53	326	1632.66
RPL23A	mRNA	414	36.365	322	1612.63
RPS28A	mRNA	203	36.505	318	1592.6
RPS13	mRNA	456	35.445	316	1582.58
RPL32	mRNA	393	35.875	312	1562.55
RPS3	mRNA	722	38.715	310	1552.53
ZEO1	mRNA	341	53.125	310	1552.53
EGD1	mRNA	473	43.14	306	1532.5
RPL40B	mRNA	387	39.24	302	1512.47
SED1	mRNA	1016	60.275	298	1492.43
RPS17A	mRNA	411	34.88	295	1477.41
RPP1B	mRNA	321	31.81	295	1477.41
RPS26A	mRNA	370	31.71	295	1477.41
PSA1	mRNA	1085	39.76	293	1467.39
BMH1	mRNA	803	27.85	284	1422.32
RPP0	mRNA	938	37.3	281	1407.29
RPL24A	mRNA	475	37.77	281	1407.29
RPL27A	mRNA	411	30.08	277	1387.26
RPL14A	mRNA	417	35.28	275	1377.24
TIF1	mRNA	1187	43.16	271	1357.21
VMA3	mRNA	482	46.26	269	1347.2
RPL3	mRNA	1163	38.01	268	1342.19
RPL11A	mRNA	524	29.71	267	1337.18
RPS17B	mRNA	411	36.91	264	1322.16
RPS9B	mRNA	588	28.68	263	1317.15
RPL20B	mRNA	519	35.25	263	1317.15
YEF3	mRNA	3134	39.39	259	1297.11
RPL41A	mRNA	77	38.26	255	1277.08
RPS19A	mRNA	435	35.04	251	1257.05
RPL5	mRNA	893	35.185	244	1221.99
MRH1	mRNA	962	63.62	241	1206.97
RPS20	mRNA	365	32.83	239	1196.95
HSP150	mRNA	1241	56.2	239	1196.95
EFT1	mRNA	2528	35.95	237	1186.93
EGD2	mRNA	524	33.86	237	1186.93
STM1	mRNA	821	34.835	232	1161.89
RPS19B	mRNA	435	35.74	231	1156.89
PMP2	mRNA	131	57.05	229	1146.87
RPS22A	mRNA	392	35.55	227	1136.85
RPL42A	mRNA	321	35.58	223	1116.82
RPS18A	mRNA	441	35.75	222	1111.81
RPL38	mRNA	236	36.415	220	1101.8
GCN4	mRNA	845	56.68	217	1086.77
SSB2	mRNA	1841	36.765	216	1081.76
RPL37A	mRNA	267	39.52	215	1076.76
RPS30B	mRNA	192	46.335	212	1061.73
HXK2	mRNA	1460	46	211	1056.72
RPL34B	mRNA	366	34.55	209	1046.71
RPS0B	mRNA	759	34.02	206	1031.68
RPS16B	mRNA	432	36.82	204	1021.67
RPL6B	mRNA	531	35.59	200	1001.63
CUP1-2	mRNA	185	68.775	200	1001.63
RPL37B	mRNA	267	35.63	198	991.616
HTA2	mRNA	398	34.89	198	991.616
RPL24B	mRNA	475	30.36	197	986.608
RPL14B	mRNA	417	40.21	196	981.6
RPL12A	mRNA	497	37.71	196	981.6
GPP1	mRNA	752	37.05	195	976.592
HTA1	mRNA	398	41.85	193	966.576
PHO84	mRNA	1763	46.49	190	951.551
RPS14A	mRNA	414	49.24	187	936.527
RPL4B	mRNA	1088	45.48	187	936.527
HHF1	mRNA	311	49.465	186	931.518
PGI1	mRNA	1664	39.24	184	921.502
RPL33B	mRNA	324	36.815	182	911.486
RPL30	mRNA	318	47.64	180	901.469
RPS26B	mRNA	360	41.335	180	901.469
CPR1	mRNA	488	48.75	179	896.461
HXT4	mRNA	1730	49.75	179	896.461
RPL16B	mRNA	597	36.385	176	881.437
RPS7A	mRNA	573	37.6	175	876.429
HHT1	mRNA	410	46.42	173	866.412
RPL19B	mRNA	570	34.12	173	866.412
RPL20A	mRNA	519	37.65	172	861.404
RPL43A	mRNA	279	39.21	171	856.396
RPL43B	mRNA	279	33.56	170	851.388
GAS1	mRNA	1679	40.98	166	831.355
RPL17B	mRNA	555	37.675	166	831.355
RPL42B	mRNA	321	38.96	163	816.331
RPP2A	mRNA	320	40.83	159	796.298
BGL2	mRNA	941	49.755	158	791.29
RPS25B	mRNA	340	34.11	157	786.282
RPL8B	mRNA	770	50.28	156	781.273
RPL13A	mRNA	600	33.73	154	771.257
RPL17A	mRNA	555	36.15	153	766.249
SSA2	mRNA	1919	32.865	152	761.241
RPP2B	mRNA	332	31.84	152	761.241
TIP1	mRNA	632	63.39	151	756.233
GIS2	mRNA	461	39.905	150	751.224
ILV5	mRNA	1187	53.21	150	751.224
RPS21B	mRNA	264	41.565	150	751.224
RPL9A	mRNA	575	40	150	751.224
ECM33	mRNA	1290	47.27	149	746.216
AHP1	mRNA	530	32.4	149	746.216
ACT1	mRNA	1128	37.38	148	741.208
HTB1	mRNA	395	52.205	146	731.192
PMP1	mRNA	122	60.765	146	731.192
SOD1	mRNA	464	34.415	144	721.176
SUI1	mRNA	326	39.79	143	716.167
PMP3	mRNA	167	48.68	141	706.151
RPL13B	mRNA	600	48.45	141	706.151
RPL16A	mRNA	600	40.62	140	701.143
UTH1	mRNA	1097	57.24	138	691.127
ADK1	mRNA	668	37.875	136	681.11
RPL6A	mRNA	531	41.085	136	681.11
RPS10B	mRNA	318	38.16	134	671.094
TRX2	mRNA	314	43.53	132	661.078
RPL34A	mRNA	366	38.63	131	656.069
RPS28B	mRNA	203	37.07	131	656.069
NCE102	mRNA	521	57.79	130	651.061
RPS11A	mRNA	471	38.24	129	646.053
BAT1	mRNA	1181	42	129	646.053
STF2	mRNA	254	49	127	636.037
RPP1A	mRNA	320	34.96	127	636.037
RPL27B	mRNA	411	37.71	125	626.02
TDH1	mRNA	998	64.65	123	616.004
RPS29B	mRNA	183	39.775	122	610.996
YNL190W	mRNA	614	56.25	119	595.971
NKP1	mRNA	716	40.14	117	585.955
COF1	mRNA	432	35.81	115	575.939
OLE1	mRNA	1532	59.435	114	570.931
RPL22A	mRNA	366	34.77	113	565.922
RPS11B	mRNA	471	47.135	112	560.914
HXK1	mRNA	1457	71.355	110	550.898
SRL1	mRNA	632	61.3	109	545.89
MMF1	mRNA	437	40.975	108	540.882
HYP2	mRNA	473	53.3	106	530.865
CIS3	mRNA	683	53.375	106	530.865
ARF1	mRNA	545	39.455	104	520.849
CTS1	mRNA	1688	62.38	104	520.849
VTC1	mRNA	389	41.58	103	515.841
RPS27B	mRNA	249	64	101	505.824
POR1	mRNA	851	48.05	98	490.8
EGO4	mRNA	296	50.05	97	485.792
YNL208W	mRNA	599	47.17	97	485.792
SEC53	mRNA	764	45.755	96	480.784
RPL8A	mRNA	770	34.605	96	480.784
HXT2	mRNA	1625	51.54	95	475.776
FPR1	mRNA	344	41.19	95	475.776
RPS7B	mRNA	573	37.04	95	475.776
HSC82	mRNA	2117	39.42	93	465.759
SBA1	mRNA	650	37.78	93	465.759
RPS27A	mRNA	249	40.34	92	460.751
RPL19A	mRNA	570	37.09	91	455.743
PET9	mRNA	956	42.57	91	455.743
TOS1	mRNA	1367	42.23	90	450.735
GSP1	mRNA	659	43.85	90	450.735
RPL26A	mRNA	384	37.59	89	445.727
PHO12	mRNA	1403	45.35	88	440.718
VOA1	mRNA	797	41.6	86	430.702
RPL35A	mRNA	363	34.345	86	430.702
MBF1	mRNA	455	49.41	86	430.702
RPS29A	mRNA	176	35.62	85	425.694
CCW14	mRNA	716	52.9	85	425.694
EXG1	mRNA	1346	54.81	85	425.694
GLK1	mRNA	1502	38.385	84	420.686
PAB1	mRNA	1733	50.12	82	410.669
GAR1	mRNA	617	29.295	80	400.653
ERG2	mRNA	668	39.17	79	395.645
SSE1	mRNA	2081	32.36	78	390.637
HXT3	mRNA	1703	43.04	78	390.637
DSE2	mRNA	977	72.08	77	385.629
HSP104	mRNA	2726	45.67	77	385.629
RPL41B	mRNA	77	49.93	77	385.629
ADE12	mRNA	1301	34.08	77	385.629
HOM2	mRNA	1097	41.16	76	380.62
HEM13	mRNA	986	51.8	75	375.612
SAH1	mRNA	1349	43.36	75	375.612
ATP2	mRNA	1535	40.79	75	375.612
TIF3	mRNA	1310	31.675	74	370.604
RPL11B	mRNA	524	37.565	74	370.604
EMI2	mRNA	1502	43.1	73	365.596
PFY1	mRNA	381	48.2	72	360.588
SNU13	mRNA	380	41.615	72	360.588
ACB1	mRNA	263	44.075	72	360.588
TRX1	mRNA	311	38.335	72	360.588
ADE13	mRNA	1448	41.29	71	355.58
NPL3	mRNA	1244	40.88	70	350.571
BMH2	mRNA	905	39.125	70	350.571
PRC1	mRNA	1598	53.59	70	350.571
RPL31B	mRNA	342	36.05	69	345.563
SCW10	mRNA	1169	57.09	69	345.563
FCY1	mRNA	476	38.91	69	345.563
CDC33	mRNA	641	39.57	67	335.547
HTB2	mRNA	395	43.23	67	335.547
PFK1	mRNA	2963	37.145	66	330.539
ARO4	mRNA	1112	42.68	65	325.531
URA1	mRNA	944	42.16	65	325.531
ASP3-4	mRNA	1088	55.155	64	320.522
ADO1	mRNA	1022	33.52	63	315.514
NOP10	mRNA	176	43.33	63	315.514
TKL1	mRNA	2042	37.445	62	310.506
NHP2	mRNA	470	34.93	62	310.506
SDH4	mRNA	545	63.785	62	310.506
ILV3	mRNA	1757	33.75	62	310.506
SUB2	mRNA	1340	57.85	61	305.498
RPL7B	mRNA	736	37.33	61	305.498
ERG11	mRNA	1592	41.73	61	305.498
HHF2	mRNA	311	63.5	61	305.498
TIF11	mRNA	461	38.33	61	305.498
SSS1	mRNA	242	42.62	61	305.498
PDI1	mRNA	1568	48.105	60	300.49
MET6	mRNA	2303	51.035	60	300.49
PIR1	mRNA	1025	66.27	59	295.482
RPL39	mRNA	156	79.78	59	295.482
NOP56	mRNA	1514	37.15	59	295.482
SCW4	mRNA	1160	66.97	59	295.482
RPL29	mRNA	183	47.615	58	290.473
TMA7	mRNA	194	36.39	57	285.465
QCR8	mRNA	284	39.95	57	285.465
CYS4	mRNA	1523	45.61	57	285.465
NOP1	mRNA	983	33.705	56	280.457
PNC1	mRNA	650	61.145	56	280.457
PRE7	mRNA	725	45.715	56	280.457
OYE2	mRNA	1202	42.22	56	280.457
PHO5	mRNA	1403	51.08	55	275.449
RTN1	mRNA	887	56.33	55	275.449
ERG3	mRNA	1097	40.19	54	270.441
ADH3	mRNA	1127	41.415	54	270.441
PEP4	mRNA	1217	48.51	54	270.441
GLC7	mRNA	939	40.9	54	270.441
SGT2	mRNA	1040	42.895	54	270.441
NOP58	mRNA	1535	42.655	54	270.441
YRB1	mRNA	605	37.075	54	270.441
ACO1	mRNA	2336	50.92	53	265.433
DED81	mRNA	1664	35.26	53	265.433
PDA1	mRNA	1262	37.44	53	265.433
ARC1	mRNA	1130	39.13	52	260.424
GND1	mRNA	1469	45.675	52	260.424
UTR2	mRNA	1403	39.57	51	255.416
SSC1	mRNA	1964	46.83	51	255.416
CYS3	mRNA	1184	44.29	51	255.416
SAM4	mRNA	977	33.62	51	255.416
COX4	mRNA	480	45.38	51	255.416
ATP16	mRNA	482	37.085	50	250.408
TIM10	mRNA	281	42.76	50	250.408
THS1	mRNA	2204	40.6	50	250.408
UBI4	mRNA	1145	60.64	50	250.408
STE2	mRNA	1295	57.525	50	250.408
VMA10	mRNA	345	49.7	50	250.408
SUI3	mRNA	857	32.21	49	245.4
SBP1	mRNA	884	39.81	48	240.392
ASN1	mRNA	1718	40.275	48	240.392
ATP3	mRNA	935	40.37	48	240.392
COX5A	mRNA	461	55.305	48	240.392
VTC3	mRNA	2507	36.705	48	240.392
LEU1	mRNA	2339	49.685	48	240.392
GPD1	mRNA	1175	36.115	48	240.392
GPD2	mRNA	1322	50.75	48	240.392
DDR48	mRNA	1292	63.78	47	235.384
COX6	mRNA	446	46.05	47	235.384
PHB1	mRNA	863	48.545	46	230.376
VRG4	mRNA	1013	53.93	46	230.376
GRX2	mRNA	431	48.395	46	230.376
MEO1	mRNA	206	41.79	46	230.376
CAF20	mRNA	485	42.135	46	230.376
YRO2	mRNA	1034	53.5	45	225.367
LIA1	mRNA	977	38.7	45	225.367
YER010C	mRNA	704	46.21	45	225.367
SUP45	mRNA	1313	45.32	45	225.367
KAR2	mRNA	2048	39.05	45	225.367
ATP18	mRNA	179	39.54	44	220.359
GCV3	mRNA	512	36.225	44	220.359
PUB1	mRNA	1361	39.39	44	220.359
ALD6	mRNA	1502	58.315	44	220.359
HSP30	mRNA	998	51.95	44	220.359
RPL9B	mRNA	575	39.215	44	220.359
OLA1	mRNA	1184	35.15	43	215.351
TAL1	mRNA	1007	48.27	43	215.351
KTR1	mRNA	1181	44.67	43	215.351
GRS1	mRNA	2003	34.67	43	215.351
PST2	mRNA	596	53.06	42	210.343
SDT1	mRNA	842	56.985	42	210.343
CDC60	mRNA	3272	34.51	42	210.343
TRR1	mRNA	959	60.925	42	210.343
YRA1	mRNA	681	45.525	42	210.343
VMA5	mRNA	1178	39.685	42	210.343
COQ5	mRNA	923	33.2	42	210.343
RHO1	mRNA	629	66	41	205.335
NPC2	mRNA	521	54.88	41	205.335
PFK2	mRNA	2879	47.19	41	205.335
UBC4	mRNA	447	76.36	41	205.335
MFA2	mRNA	116	129.92	41	205.335
RPT2	mRNA	1313	31.76	41	205.335
PRE1	mRNA	596	39.28	41	205.335
CDC48	mRNA	2507	42.06	40	200.327
GSF2	mRNA	1211	42.97	40	200.327
SHM2	mRNA	1409	49.38	40	200.327
CCT3	mRNA	1604	30.04	40	200.327
SAM1	mRNA	1148	49.93	40	200.327
PIL1	mRNA	1019	55.585	40	200.327
QCR7	mRNA	383	46.215	40	200.327
HPT1	mRNA	665	47.235	40	200.327
MDM34	mRNA	1379	47.9	39	195.318
YBR085C-A	mRNA	257	51.59	39	195.318
HSP60	mRNA	1718	36.22	39	195.318
ELO2	mRNA	1043	52.42	39	195.318
RPL36A	mRNA	303	68.29	39	195.318
HIS1	mRNA	893	50.79	39	195.318
SRP14	mRNA	440	38.29	39	195.318
KTR5	mRNA	1568	60.04	39	195.318
LSM5	mRNA	281	31.96	39	195.318
UGP1	mRNA	1499	60.42	39	195.318
APE3	mRNA	1613	46.19	39	195.318
KRS1	mRNA	1775	32.125	38	190.31
PCL5	mRNA	689	38.175	38	190.31
MIR1	mRNA	935	62.725	38	190.31
IZH2	mRNA	953	42.735	38	190.31
SNA3	mRNA	401	39.19	38	190.31
YSY6	mRNA	197	38.63	38	190.31
SSH1	mRNA	1472	43.95	38	190.31
YMR295C	mRNA	593	33.665	38	190.31
TEF4	mRNA	1239	34.195	38	190.31
FRS1	mRNA	1787	42.51	38	190.31
TOM40	mRNA	1163	53.295	38	190.31
VMA16	mRNA	641	57.9	38	190.31
YET3	mRNA	611	48.55	37	185.302
NTF2	mRNA	377	46.64	37	185.302
ERG25	mRNA	929	48.82	37	185.302
ATP1	mRNA	1637	36.95	37	185.302
ARO8	mRNA	1502	42.59	37	185.302
HTS1	mRNA	1640	34.87	37	185.302
PIC2	mRNA	902	45.95	37	185.302
VMA4	mRNA	701	46	37	185.302
SEM1	mRNA	269	44.92	36	180.294
ASC1	mRNA	960	32.635	36	180.294
ELO3	mRNA	1037	44.845	36	180.294
YDL124W	mRNA	938	67.285	36	180.294
DYS1	mRNA	1163	30.175	36	180.294
URA5	mRNA	680	43.26	36	180.294
CPR5	mRNA	677	42.07	35	175.286
SNC2	mRNA	347	48.94	35	175.286
SAR1	mRNA	573	65	35	175.286
CTF8	mRNA	401	43.29	35	175.286
ATP4	mRNA	734	42.43	35	175.286
ARO3	mRNA	1112	42.33	35	175.286
RPO26	mRNA	468	41.07	35	175.286
SIM1	mRNA	1433	54.47	35	175.286
INA1	mRNA	2027	55.5	35	175.286
SPL2	mRNA	446	51	35	175.286
SND2	mRNA	545	41.755	34	170.278
HNT1	mRNA	477	45.14	34	170.278
MIC26	mRNA	701	55.49	34	170.278
TIF5	mRNA	1217	42.62	34	170.278
CSG2	mRNA	1232	45.385	34	170.278
IPP1	mRNA	863	46.58	34	170.278
PIS1	mRNA	662	39.335	34	170.278
DBP2	mRNA	1641	35.115	34	170.278
VMA11	mRNA	494	42.66	34	170.278
RPS24B	mRNA	408	38.69	34	170.278
SNF7	mRNA	722	38.605	34	170.278
QCR6	mRNA	443	47.48	33	165.269
YHM2	mRNA	944	46.32	33	165.269
PYP1	mRNA	725	42.91	33	165.269
ABF2	mRNA	551	52.76	33	165.269
CBF5	mRNA	1451	32.7	33	165.269
PRO3	mRNA	860	39.26	33	165.269
ADE17	mRNA	1778	55.15	33	165.269
NDE1	mRNA	1682	55.58	33	165.269
PRY2	mRNA	989	48.71	33	165.269
LSP1	mRNA	1025	87.05	33	165.269
YPT1	mRNA	620	40.04	33	165.269
SND3	mRNA	566	55.58	33	165.269
YLR257W	mRNA	965	45.54	33	165.269
EMP24	mRNA	611	43.88	32	160.261
ERG10	mRNA	1196	36.33	32	160.261
CHA1	mRNA	1082	40.93	32	160.261
APT1	mRNA	563	46.01	32	160.261
FAA4	mRNA	2084	44.065	32	160.261
NHP6A	mRNA	281	56.39	31	155.253
ARF2	mRNA	585	59.22	31	155.253
RDI1	mRNA	608	42.39	31	155.253
ECM15	mRNA	314	51.68	31	155.253
ACP1	mRNA	377	39.87	31	155.253
RIB4	mRNA	509	32.48	31	155.253
RPT1	mRNA	1403	39.53	31	155.253
SUI2	mRNA	914	49.04	31	155.253
RPC10	mRNA	212	44.46	31	155.253
URA7	mRNA	1739	35.79	31	155.253
ARC19	mRNA	515	40.26	31	155.253
EFB1	mRNA	621	43.37	31	155.253
ERG6	mRNA	1151	49.42	31	155.253
ATP19	mRNA	206	39.915	30	150.245
ERG1	mRNA	1490	56.195	30	150.245
DEF1	mRNA	2216	27.28	30	150.245
ZUO1	mRNA	1301	47.745	30	150.245
GAS5	mRNA	1454	41.77	30	150.245
TIF35	mRNA	824	46.26	30	150.245
LEU4	mRNA	1859	43.825	30	150.245
MDE1	mRNA	734	43.115	30	150.245
RDL1	mRNA	419	44.535	30	150.245
DUG1	mRNA	1445	33.015	30	150.245
WTM1	mRNA	1313	40.83	29	145.237
VTC4	mRNA	2165	40.09	29	145.237
SBH2	mRNA	266	61.83	29	145.237
SOD2	mRNA	701	69.81	29	145.237
ARO2	mRNA	1130	45.86	29	145.237
SIS1	mRNA	1058	77.33	29	145.237
ARC15	mRNA	464	43.48	29	145.237
IMD3	mRNA	1571	31.62	29	145.237
GVP36	mRNA	980	41.77	29	145.237
ATP17	mRNA	305	58.695	28	140.229
COX12	mRNA	251	43.295	28	140.229
TYS1	mRNA	1184	42.225	28	140.229
TPO2	mRNA	1844	71.495	28	140.229
YNK1	mRNA	461	91.695	28	140.229
SSZ1	mRNA	1616	43.435	28	140.229
MDM35	mRNA	260	51.88	28	140.229
GRX1	mRNA	332	48.34	28	140.229
RIM1	mRNA	408	46.62	28	140.229
PRY1	mRNA	899	66.315	28	140.229
TPM1	mRNA	599	56.345	28	140.229
SEC14	mRNA	915	53.615	28	140.229
ALD5	mRNA	1562	39.74	28	140.229
ILS1	mRNA	3218	37.965	28	140.229
SES1	mRNA	1388	49.005	28	140.229
VMA1	mRNA	3215	43.6	28	140.229
MUP1	mRNA	1724	38.895	28	140.229
YPL225W	mRNA	440	43.62	28	140.229
VPS21	mRNA	632	36.67	27	135.22
RPN1	mRNA	2981	41.15	27	135.22
GLO3	mRNA	1481	43.68	27	135.22
ELO1	mRNA	932	39.91	27	135.22
SHR3	mRNA	632	46.17	27	135.22
RPB8	mRNA	440	28.52	27	135.22
SUN4	mRNA	1275	71.04	27	135.22
GDT1	mRNA	842	35.68	27	135.22
CRP1	mRNA	1397	42.56	27	135.22
YOP1	mRNA	543	76.8	27	135.22
GUA1	mRNA	1577	33.3	27	135.22
STT3	mRNA	2156	39.48	27	135.22
RNR4	mRNA	1037	44.59	27	135.22
ADE5_2C7	mRNA	2408	30.62	27	135.22
MCK1	mRNA	1127	64.91	27	135.22
GBP2	mRNA	1283	39.9	27	135.22
SCS2	mRNA	734	45.9	27	135.22
VMA8	mRNA	770	37.16	27	135.22
YKT6	mRNA	602	41.62	26	130.212
BRE5	mRNA	1547	25.255	26	130.212
VPS68	mRNA	554	49.82	26	130.212
RNR2	mRNA	1199	47.93	26	130.212
NSR1	mRNA	1244	40.79	26	130.212
SCP160	mRNA	3668	45.065	26	130.212
RPS14B	mRNA	417	42.69	26	130.212
SDH3	mRNA	596	52.235	26	130.212
GCD11	mRNA	1583	57.37	26	130.212
SPI1	mRNA	446	71.295	26	130.212
HMO1	mRNA	740	49.815	26	130.212
YIP5	mRNA	932	32.225	26	130.212
HOM6	mRNA	1079	48.25	26	130.212
PMI40	mRNA	1290	42.68	26	130.212
DAP1	mRNA	458	37.205	26	130.212
MET14	mRNA	608	51.64	26	130.212
DHH1	mRNA	1520	72.41	26	130.212
FRS2	mRNA	1511	49.135	26	130.212
ERG4	mRNA	1421	36.42	25	125.204
YET1	mRNA	620	37.41	25	125.204
RPN2	mRNA	2837	34.83	25	125.204
SSA1	mRNA	1928	46	25	125.204
TIM17	mRNA	476	39.17	25	125.204
ADH6	mRNA	1082	46.92	25	125.204
TPO4	mRNA	1979	48.07	25	125.204
PST1	mRNA	1334	55.1	25	125.204
EFT2	mRNA	2528	48.82	25	125.204
HMF1	mRNA	389	50.44	25	125.204
COS1	mRNA	1145	41.05	25	125.204
SBH1	mRNA	248	64.5	25	125.204
CMK2	mRNA	1343	42.77	25	125.204
MIC10	mRNA	293	49.57	25	125.204
GOT1	mRNA	417	42.38	25	125.204
PGM2	mRNA	1709	82.71	25	125.204
SML1	mRNA	314	91.5	25	125.204
KRE2	mRNA	1328	51.86	25	125.204
ITR1	mRNA	1754	61.88	25	125.204
RPS4B	mRNA	786	27.6	25	125.204
YPT7	mRNA	626	34.91	25	125.204
GPH1	mRNA	2708	77.15	25	125.204
SEC13	mRNA	893	34.81	25	125.204
PRE4	mRNA	800	94.29	25	125.204
CRH1	mRNA	1523	68.43	25	125.204
ILV2	mRNA	2063	49.95	25	125.204
VAS1	mRNA	3314	40	25	125.204
MPC2	mRNA	389	61.9	25	125.204
KSH1	mRNA	218	39.2	25	125.204
YGP1	mRNA	1064	101.09	25	125.204
SMT3	mRNA	305	39.56	25	125.204
PTR2	mRNA	1805	56.47	25	125.204
TPS2	mRNA	2690	49.47	24	120.196
NSG2	mRNA	899	32.215	24	120.196
HYR1	mRNA	491	43.115	24	120.196
SDH2	mRNA	800	57.925	24	120.196
MCA1	mRNA	1298	32.31	24	120.196
FPR4	mRNA	1178	36.355	24	120.196
YPQ1	mRNA	926	34.165	24	120.196
STF1	mRNA	260	62.295	24	120.196
HXT7	mRNA	1712	55.19	24	120.196
GAS3	mRNA	1574	43.55	24	120.196
YDR341C	mRNA	1823	32.44	24	120.196
ARL1	mRNA	551	41.13	24	120.196
ERP1	mRNA	659	56.21	24	120.196
DED1	mRNA	1814	34.11	24	120.196
MDH1	mRNA	1004	49.28	23	115.188
RPN8	mRNA	1016	38.43	23	115.188
NOP7	mRNA	1817	25.48	23	115.188
ZRT1	mRNA	1130	49.13	23	115.188
WBP1	mRNA	1292	31.38	23	115.188
TMA17	mRNA	452	61.68	23	115.188
SUR2	mRNA	1049	39.05	23	115.188
COR1	mRNA	1373	25.95	23	115.188
EGT2	mRNA	3125	55.39	23	115.188
AIM45	mRNA	1034	36.77	23	115.188
NOG1	mRNA	1943	43.53	23	115.188
GET1	mRNA	707	33.14	23	115.188
BUR6	mRNA	428	35.24	23	115.188
RPL22B	mRNA	369	68.96	23	115.188
TSC13	mRNA	932	35.95	23	115.188
IRC22	mRNA	677	36.24	23	115.188
FCY2	mRNA	1601	60.65	23	115.188
HSP10	mRNA	320	37.68	23	115.188
YBL036C	mRNA	773	36.9	23	115.188
YIP3	mRNA	531	56.71	23	115.188
MIX17	mRNA	470	42.8	23	115.188
TOM6	mRNA	185	42.62	23	115.188
KTR4	mRNA	1394	40.95	23	115.188
SEC24	mRNA	2780	40.68	23	115.188
VMA7	mRNA	356	77.5	23	115.188
RGI1	mRNA	485	80.5	22	110.18
NYV1	mRNA	762	36.895	22	110.18
PHO8	mRNA	1700	42.34	22	110.18
ZRT2	mRNA	1268	32.42	22	110.18
PHO86	mRNA	935	37.47	22	110.18
TVP18	mRNA	503	38.85	22	110.18
RBD2	mRNA	788	47.82	22	110.18
MTD1	mRNA	962	54.91	22	110.18
PEA2	mRNA	1262	48.42	22	110.18
RPS8A	mRNA	610	45.88	22	110.18
ZWF1	mRNA	1517	52.165	22	110.18
MIC19	mRNA	512	36.055	22	110.18
MCR1	mRNA	965	49.385	22	110.18
QDR2	mRNA	1628	60.965	22	110.18
PRE9	mRNA	776	50.91	22	110.18
PRE6	mRNA	764	42.36	22	110.18
GPI16	mRNA	1832	39.155	22	110.18
MGE1	mRNA	686	42.05	22	110.18
RPC19	mRNA	428	47.49	22	110.18
POB3	mRNA	1658	35.28	22	110.18
SAM2	mRNA	1154	44.025	22	110.18
ARA1	mRNA	1034	36.23	22	110.18
AAT2	mRNA	1256	39.66	22	110.18
CYT1	mRNA	929	41.095	22	110.18
ASN2	mRNA	1718	36.89	22	110.18
ERV14	mRNA	416	27.16	22	110.18
SRP40	mRNA	1220	38	21	105.171
MRPS12	mRNA	461	37.32	21	105.171
HAC1	mRNA	717	74.95	21	105.171
PBI2	mRNA	227	37.95	21	105.171
RVS161	mRNA	797	50.78	21	105.171
CDC37	mRNA	1520	31.31	21	105.171
RPN11	mRNA	920	41.05	21	105.171
CWP1	mRNA	719	55.64	21	105.171
DPS1	mRNA	1673	44.78	21	105.171
RPG1	mRNA	2894	34.36	21	105.171
GSY1	mRNA	2126	42.52	21	105.171
TSL1	mRNA	3296	44.87	21	105.171
RPC31	mRNA	755	30.56	21	105.171
NUG1	mRNA	1562	27.69	21	105.171
PAA1	mRNA	575	51.25	21	105.171
TIF34	mRNA	1043	70	21	105.171
HRP1	mRNA	1604	36.41	21	105.171
ARP2	mRNA	1176	42.64	21	105.171
ZRC1	mRNA	1328	36.67	21	105.171
ADE6	mRNA	4076	40	21	105.171
SEC23	mRNA	2306	46.91	21	105.171
DOT6	mRNA	2012	38.1	21	105.171
GLR1	mRNA	1451	44.24	21	105.171
IDI1	mRNA	866	35.43	21	105.171
RVB1	mRNA	1391	45.78	21	105.171
ICY1	mRNA	383	75.21	20	100.163
YLR179C	mRNA	605	35.5	20	100.163
TUB3	mRNA	1338	29.34	20	100.163
ATP14	mRNA	374	46.295	20	100.163
IDH2	mRNA	1109	57.12	20	100.163
UTR4	mRNA	683	62.625	20	100.163
THR4	mRNA	1544	33.875	20	100.163
WRS1	mRNA	1298	54.855	20	100.163
SSO2	mRNA	887	37.85	20	100.163
PHO13	mRNA	938	37.09	20	100.163
HTZ1	mRNA	404	52.85	20	100.163
RBG1	mRNA	1109	26.29	20	100.163
TNA1	mRNA	1604	48.56	20	100.163
RLI1	mRNA	1826	45.305	20	100.163
BDH1	mRNA	1148	31.015	20	100.163
YDJ1	mRNA	1229	38.75	20	100.163
FUN12	mRNA	3008	34.58	20	100.163
ATP5	mRNA	638	39.465	20	100.163
TSC3	mRNA	242	48.91	20	100.163
SEC66	mRNA	620	41.365	20	100.163
TIF6	mRNA	737	56.65	20	100.163
GAT2	mRNA	1682	61.295	20	100.163
POM33	mRNA	839	47.795	20	100.163
PDB1	mRNA	1100	46.875	20	100.163
KES1	mRNA	1304	60.745	20	100.163
COX5B	mRNA	456	40.98	20	100.163
DBP3	mRNA	1571	34.45	20	100.163
CPR3	mRNA	548	45.23	20	100.163
QCR9	mRNA	201	65.845	20	100.163
ENA1	mRNA	3275	56.095	20	100.163
ARG4	mRNA	1391	31.16	20	100.163
MRPS18	mRNA	653	28.03	20	100.163
SSB1	mRNA	1841	39.59	20	100.163
SPO24	mRNA	203	64.09	19	95.1551
ERG5	mRNA	1616	70.62	19	95.1551
PLB2	mRNA	2120	72.52	19	95.1551
RPN3	mRNA	1571	54.57	19	95.1551
EIS1	mRNA	2531	57.71	19	95.1551
ERG13	mRNA	1475	38.78	19	95.1551
ENT1	mRNA	1364	33.42	19	95.1551
CIT1	mRNA	1439	70.25	19	95.1551
MSN4	mRNA	1892	55.67	19	95.1551
RPB5	mRNA	647	53.55	19	95.1551
TPO3	mRNA	1868	47.82	19	95.1551
MDH2	mRNA	1133	49.09	19	95.1551
MAG1	mRNA	890	51.32	19	95.1551
RIP1	mRNA	647	65.04	19	95.1551
ECM14	mRNA	1292	45.13	19	95.1551
CBS1	mRNA	689	23	19	95.1551
SQT1	mRNA	1295	27.68	19	95.1551
TIM8	mRNA	263	43	19	95.1551
TIF2	mRNA	1187	41.24	19	95.1551
HIS4	mRNA	2399	43.5	19	95.1551
PRE3	mRNA	648	60.83	19	95.1551
APA1	mRNA	965	52.13	19	95.1551
CDC42	mRNA	575	45.95	19	95.1551
RFS1	mRNA	632	47.58	19	95.1551
PRB1	mRNA	1907	61.81	19	95.1551
TIM11	mRNA	290	74.27	19	95.1551
LSM12	mRNA	563	46.78	19	95.1551
PUP3	mRNA	617	39.96	19	95.1551
PPN2	mRNA	980	40.83	19	95.1551
IMP1	mRNA	572	40.03	19	95.1551
PDX3	mRNA	686	60.28	19	95.1551
LSM6	mRNA	260	31.5	19	95.1551
YSA1	mRNA	695	40.97	19	95.1551
URM1	mRNA	299	36.52	19	95.1551
MAP2	mRNA	1265	51.95	19	95.1551
LAT1	mRNA	1448	43.55	19	95.1551
PRE2	mRNA	863	56.14	19	95.1551
GLT1	mRNA	6437	66.645	18	90.1469
HHO1	mRNA	776	42.27	18	90.1469
SCL1	mRNA	758	66.21	18	90.1469
TPS1	mRNA	1487	64.785	18	90.1469
GLY1	mRNA	1163	58.315	18	90.1469
OST1	mRNA	1430	55.12	18	90.1469
CAM1	mRNA	1247	35.535	18	90.1469
ENT2	mRNA	1841	37.46	18	90.1469
ERG28	mRNA	446	45.81	18	90.1469
RNQ1	mRNA	1217	41.74	18	90.1469
RPB9	mRNA	368	39.645	18	90.1469
ERD2	mRNA	660	58.47	18	90.1469
RAS2	mRNA	968	49.985	18	90.1469
NRD1	mRNA	1727	51.4	18	90.1469
GUK1	mRNA	563	48.97	18	90.1469
FPR3	mRNA	1235	23.51	18	90.1469
FAS2	mRNA	5663	59.165	18	90.1469
SCD6	mRNA	1049	39.22	18	90.1469
DIP5	mRNA	1826	52.945	18	90.1469
KRE6	mRNA	2162	57.675	18	90.1469
AIM29	mRNA	467	54.57	18	90.1469
IFA38	mRNA	1043	28.515	18	90.1469
TMA10	mRNA	260	39.56	18	90.1469
EMP70	mRNA	2003	35.595	18	90.1469
PRE5	mRNA	704	76.9	18	90.1469
LPD1	mRNA	1499	74.085	18	90.1469
TOM20	mRNA	551	34.91	18	90.1469
LHP1	mRNA	827	37.39	18	90.1469
SSP120	mRNA	704	32.5	18	90.1469
SPE3	mRNA	881	59.12	18	90.1469
BET3	mRNA	581	59.075	18	90.1469
MLC1	mRNA	449	59.42	18	90.1469
NIP7	mRNA	545	52.12	18	90.1469
CCT5	mRNA	1688	36.465	18	90.1469
FTR1	mRNA	1214	56.49	18	90.1469
GDH1	mRNA	1364	65.24	18	90.1469
CGR1	mRNA	362	31.63	18	90.1469
AIM17	mRNA	1397	44.08	18	90.1469
IZH1	mRNA	950	47.06	18	90.1469
VMA2	mRNA	1553	59.875	18	90.1469
LOG1	mRNA	737	29.23	18	90.1469
YCP4	mRNA	743	38.865	18	90.1469
KIN3	mRNA	1307	35.905	18	90.1469
ELF1	mRNA	437	42.305	18	90.1469
NOP6	mRNA	677	29.52	17	85.1388
ARC40	mRNA	1154	47.72	17	85.1388
RPL7A	mRNA	736	48.09	17	85.1388
MSC7	mRNA	1934	41.27	17	85.1388
MAP1	mRNA	1163	59.39	17	85.1388
ERG24	mRNA	1316	48.39	17	85.1388
SCW11	mRNA	1628	63.86	17	85.1388
GPP2	mRNA	752	54.16	17	85.1388
PHB2	mRNA	932	40.61	17	85.1388
CMD1	mRNA	443	53.55	17	85.1388
RER1	mRNA	566	60.74	17	85.1388
MCM1	mRNA	860	51.32	17	85.1388
IMD4	mRNA	1575	36.88	17	85.1388
HEM15	mRNA	1181	53.04	17	85.1388
RAD23	mRNA	1196	37.96	17	85.1388
RET3	mRNA	569	57.35	17	85.1388
VPS74	mRNA	1037	44.39	17	85.1388
ARO9	mRNA	1541	52.9	17	85.1388
EMC6	mRNA	326	48.65	17	85.1388
VPS24	mRNA	674	48.36	17	85.1388
TOH1	mRNA	1190	61.48	17	85.1388
FOL2	mRNA	731	31.38	17	85.1388
SVF1	mRNA	1445	38	17	85.1388
AMN1	mRNA	1649	84.95	17	85.1388
ALE1	mRNA	1859	42.38	17	85.1388
LSC1	mRNA	989	44.5	17	85.1388
BRX1	mRNA	875	35.09	17	85.1388
MNN10	mRNA	1181	38.85	17	85.1388
TAT2	mRNA	1778	42.25	17	85.1388
IST2	mRNA	2840	34	17	85.1388
GUS1	mRNA	2126	54.57	17	85.1388
IMG2	mRNA	440	56.52	17	85.1388
PPH22	mRNA	1133	43.58	17	85.1388
FAS1	mRNA	6155	60.96	17	85.1388
AGP1	mRNA	1901	38.06	17	85.1388
IMD2	mRNA	1571	45.62	17	85.1388
SRP54	mRNA	1625	44.32	17	85.1388
END3	mRNA	1049	50.87	16	80.1306
ERV25	mRNA	635	58.52	16	80.1306
COX14	mRNA	212	62.255	16	80.1306
DYN2	mRNA	280	37.615	16	80.1306
CLG1	mRNA	1358	50.69	16	80.1306
NAB2	mRNA	1577	37.415	16	80.1306
MRT4	mRNA	710	26.975	16	80.1306
APQ12	mRNA	416	54.74	16	80.1306
TPO5	mRNA	1856	51.86	16	80.1306
UBC1	mRNA	647	38.42	16	80.1306
CCP1	mRNA	1085	46.99	16	80.1306
UBP6	mRNA	1499	52.43	16	80.1306
CHO1	mRNA	830	76.47	16	80.1306
NOP15	mRNA	662	30.41	16	80.1306
PTK2	mRNA	2456	39.155	16	80.1306
SDD2	mRNA	437	49.64	16	80.1306
LSM3	mRNA	269	22.69	16	80.1306
LCB2	mRNA	1685	31.875	16	80.1306
THO1	mRNA	656	55.35	16	80.1306
ACS2	mRNA	2051	60.335	16	80.1306
RPT4	mRNA	1313	39.55	16	80.1306
NCW2	mRNA	764	69.43	16	80.1306
CHO2	mRNA	2609	57.575	16	80.1306
RPA34	mRNA	701	36.95	16	80.1306
CCT8	mRNA	1706	44.88	16	80.1306
YHR020W	mRNA	2066	29.185	16	80.1306
ETT1	mRNA	1238	31.31	16	80.1306
CHS1	mRNA	3395	52.24	16	80.1306
SRP21	mRNA	503	59.295	16	80.1306
QCR2	mRNA	1106	30.935	16	80.1306
LSM2	mRNA	288	45.52	16	80.1306
ARC18	mRNA	536	51.565	16	80.1306
FUR1	mRNA	650	35.805	16	80.1306
TED1	mRNA	1421	45.335	16	80.1306
NOP2	mRNA	1856	36.63	15	75.1224
NHP6B	mRNA	327	44.69	15	75.1224
YOR283W	mRNA	692	50.9	15	75.1224
RPT6	mRNA	1217	56.68	15	75.1224
PHM6	mRNA	314	65.8	15	75.1224
RIE1	mRNA	2345	57.57	15	75.1224
HSK3	mRNA	209	51.17	15	75.1224
COX13	mRNA	389	53.82	15	75.1224
TOA2	mRNA	368	45.67	15	75.1224
OST2	mRNA	392	57.1	15	75.1224
MSC1	mRNA	1541	71.75	15	75.1224
PGA3	mRNA	938	48.4	15	75.1224
ERG20	mRNA	1058	58.19	15	75.1224
PDR5	mRNA	4535	39.84	15	75.1224
SHS1	mRNA	1655	36.15	15	75.1224
TOM22	mRNA	458	47.22	15	75.1224
SPT5	mRNA	3191	25.67	15	75.1224
HEM3	mRNA	983	32.12	15	75.1224
ILV6	mRNA	929	48.68	15	75.1224
ILV1	mRNA	1730	46.48	15	75.1224
FMP52	mRNA	695	39.14	15	75.1224
RPN7	mRNA	1289	48.3	15	75.1224
SHM1	mRNA	1472	31.6	15	75.1224
BDF2	mRNA	1916	23.96	15	75.1224
CLC1	mRNA	701	68.08	15	75.1224
MAE1	mRNA	2009	38.96	15	75.1224
YDC1	mRNA	953	47.55	15	75.1224
KRE9	mRNA	830	46.32	15	75.1224
FAA1	mRNA	2102	27	15	75.1224
YMR315W	mRNA	1049	47.76	15	75.1224
VPS1	mRNA	2114	57.55	15	75.1224
SHB17	mRNA	815	35.33	15	75.1224
EMC2	mRNA	878	45	15	75.1224
EMC4	mRNA	572	41.08	15	75.1224
TYE7	mRNA	875	36.67	15	75.1224
FKS1	mRNA	5630	42.43	15	75.1224
HAP4	mRNA	1664	48	15	75.1224
SEC63	mRNA	1991	28.81	15	75.1224
GSY2	mRNA	2117	65.48	15	75.1224
DPM1	mRNA	803	46.55	15	75.1224
VPH1	mRNA	2522	64	15	75.1224
SEC17	mRNA	879	38.08	15	75.1224
CKB1	mRNA	836	32.09	15	75.1224
PRE10	mRNA	866	60.21	15	75.1224
DCP1	mRNA	695	36.83	15	75.1224
SPT15	mRNA	722	47.87	15	75.1224
TFS1	mRNA	659	55.05	15	75.1224
PPX1	mRNA	1193	40.55	15	75.1224
OM14	mRNA	405	66.55	15	75.1224
TIR1	mRNA	764	57.17	15	75.1224
TIM13	mRNA	317	41.14	15	75.1224
MLC2	mRNA	491	62.68	15	75.1224
YMR099C	mRNA	893	28.13	15	75.1224
VMA13	mRNA	1436	65.77	15	75.1224
THR1	mRNA	1073	44.08	15	75.1224
HEK2	mRNA	1145	33.71	15	75.1224
SND1	mRNA	2633	49.23	15	75.1224
CYB5	mRNA	362	66.35	15	75.1224
PAT1	mRNA	2390	53	15	75.1224
LAC1	mRNA	1256	78.25	15	75.1224
NOP16	mRNA	695	38.52	15	75.1224
COX8	mRNA	236	95.7	15	75.1224
CYC7	mRNA	341	46.78	15	75.1224
ATP20	mRNA	347	58.78	15	75.1224
SVS1	mRNA	782	66.05	15	75.1224
ALA1	mRNA	2876	43.43	15	75.1224
GRS2	mRNA	1856	30.32	15	75.1224
HSP42	mRNA	1127	62.15	14	70.1143
CPR6	mRNA	1115	49.575	14	70.1143
TUF1	mRNA	1313	92.595	14	70.1143
RPN6	mRNA	1304	62.62	14	70.1143
COX17	mRNA	209	64.65	14	70.1143
PTH2	mRNA	626	36.925	14	70.1143
PDR16	mRNA	1055	56.42	14	70.1143
CIC1	mRNA	1130	82.475	14	70.1143
NIP1	mRNA	2438	62.285	14	70.1143
SMF3	mRNA	1421	70.045	14	70.1143
SUR7	mRNA	908	47.095	14	70.1143
CSM1	mRNA	572	39.36	14	70.1143
BFR1	mRNA	1412	71.595	14	70.1143
KGD2	mRNA	1391	47.74	14	70.1143
RPO21	mRNA	5201	45.085	14	70.1143
HFD1	mRNA	1598	33.38	14	70.1143
RRP14	mRNA	1304	30.14	14	70.1143
HCR1	mRNA	797	32.11	14	70.1143
RPS9A	mRNA	594	71.73	14	70.1143
PER33	mRNA	821	103.4	14	70.1143
RHO5	mRNA	995	42.25	14	70.1143
MNN2	mRNA	1793	37.16	14	70.1143
TCB3	mRNA	4637	27.98	14	70.1143
PHS1	mRNA	653	45.205	14	70.1143
VTC2	mRNA	2486	31.51	14	70.1143
ERP2	mRNA	647	44.74	14	70.1143
PPQ1	mRNA	1649	59.195	14	70.1143
OST3	mRNA	1052	52.35	14	70.1143
DBP5	mRNA	1448	50.505	14	70.1143
CCT7	mRNA	1652	34.505	14	70.1143
RPL18B	mRNA	561	66.28	14	70.1143
PGM1	mRNA	1712	44.985	14	70.1143
SCS7	mRNA	1154	63.58	14	70.1143
RNA1	mRNA	1223	30.86	14	70.1143
RIB3	mRNA	626	41.42	14	70.1143
CCT6	mRNA	1640	41.39	14	70.1143
HIS3	mRNA	662	43.045	14	70.1143
HOG1	mRNA	1307	72.445	14	70.1143
MNP1	mRNA	584	33.285	14	70.1143
PRE8	mRNA	752	40.38	14	70.1143
LOC1	mRNA	614	21.31	14	70.1143
CDC12	mRNA	1223	62.915	14	70.1143
HRT1	mRNA	365	62.45	14	70.1143
SER1	mRNA	1187	46.77	14	70.1143
NFS1	mRNA	1493	42.255	14	70.1143
RPE1	mRNA	716	34.19	14	70.1143
LSC2	mRNA	1283	76.965	14	70.1143
CUB1	mRNA	1655	56.785	14	70.1143
LEU9	mRNA	1814	45.215	14	70.1143
LCB1	mRNA	1676	49.84	14	70.1143
GDI1	mRNA	1355	65.795	14	70.1143
ASP1	mRNA	1145	35.665	14	70.1143
TOM5	mRNA	152	75.685	14	70.1143
SOP4	mRNA	704	46.87	14	70.1143
TUB1	mRNA	1344	28.355	14	70.1143
FRD1	mRNA	1412	42.53	14	70.1143
SEC21	mRNA	2807	46.79	14	70.1143
SEC28	mRNA	890	82.695	14	70.1143
UGA1	mRNA	1415	74.765	14	70.1143
IES6	mRNA	500	33.25	14	70.1143
YIM1	mRNA	1097	40.315	14	70.1143
ENV9	mRNA	992	41.35	14	70.1143
TAT1	mRNA	1859	53.365	14	70.1143
GIM3	mRNA	389	41.15	14	70.1143
RNH70	mRNA	1661	40.725	14	70.1143
DID2	mRNA	614	35	13	65.1061
STE18	mRNA	332	39.55	13	65.1061
RPN5	mRNA	1337	39.9	13	65.1061
MRPL31	mRNA	395	54.48	13	65.1061
SDS24	mRNA	1583	62.15	13	65.1061
TCP1	mRNA	1679	44.95	13	65.1061
LYS20	mRNA	1286	37.48	13	65.1061
FUM1	mRNA	1466	29	13	65.1061
AIM41	mRNA	557	79.04	13	65.1061
SDH8	mRNA	416	51.45	13	65.1061
RAM2	mRNA	950	61.5	13	65.1061
ALO1	mRNA	1580	28.19	13	65.1061
ERV46	mRNA	1247	36.96	13	65.1061
VPS62	mRNA	1403	38.87	13	65.1061
COS6	mRNA	1145	60.44	13	65.1061
TDA3	mRNA	1571	39.39	13	65.1061
RSM10	mRNA	611	44.93	13	65.1061
UBP3	mRNA	2738	42.64	13	65.1061
CAR2	mRNA	1274	56.05	13	65.1061
SAS10	mRNA	1832	47.27	13	65.1061
TCB1	mRNA	3560	38.84	13	65.1061
PLN1	mRNA	851	24	13	65.1061
PMT1	mRNA	2453	56.64	13	65.1061
PMT2	mRNA	2279	42.55	13	65.1061
NHA1	mRNA	2957	30.59	13	65.1061
CDC10	mRNA	968	43.96	13	65.1061
UBA1	mRNA	3074	48.95	13	65.1061
FIS1	mRNA	467	21.9	13	65.1061
AHC2	mRNA	386	43.71	13	65.1061
CBR1	mRNA	854	37.5	13	65.1061
COQ6	mRNA	1439	49.23	13	65.1061
GET3	mRNA	1064	34.5	13	65.1061
SRP72	mRNA	1922	47.71	13	65.1061
RPT3	mRNA	1286	138.6	13	65.1061
ATP7	mRNA	524	76.44	13	65.1061
VTA1	mRNA	992	41	13	65.1061
HNM1	mRNA	1691	66.76	13	65.1061
RPN12	mRNA	824	37.04	13	65.1061
PRS5	mRNA	1490	34.5	13	65.1061
SRV2	mRNA	1580	91.3	13	65.1061
CUE1	mRNA	611	32.39	13	65.1061
YRB2	mRNA	983	42.88	13	65.1061
AGE1	mRNA	1448	121.96	13	65.1061
HMRA1	mRNA	382	52.76	13	65.1061
SEC11	mRNA	503	67.95	13	65.1061
GIC2	mRNA	1151	62.95	13	65.1061
OPT1	mRNA	2399	40.07	13	65.1061
APS2	mRNA	443	31.32	13	65.1061
MDH3	mRNA	1031	44.81	13	65.1061
RPC40	mRNA	1007	40.92	13	65.1061
RFA3	mRNA	368	34.84	13	65.1061
SER33	mRNA	1409	79.14	13	65.1061
TRP5	mRNA	2123	36.72	13	65.1061
FRQ1	mRNA	572	32.58	13	65.1061
ARP3	mRNA	1349	62.69	13	65.1061
VCX1	mRNA	1235	36.1	13	65.1061
GIM5	mRNA	492	28.67	13	65.1061
RCF2	mRNA	674	40.95	13	65.1061
HOM3	mRNA	1583	37.09	13	65.1061
LSB1	mRNA	725	67.77	13	65.1061
BAT2	mRNA	1130	77.34	13	65.1061
DAP2	mRNA	2456	37.58	13	65.1061
BIM1	mRNA	1034	36.86	13	65.1061
TMH11	mRNA	317	57.78	13	65.1061
RPS6B	mRNA	711	58.94	13	65.1061
XRN1	mRNA	4586	36.96	13	65.1061
HRR25	mRNA	1484	54.81	13	65.1061
YMR31	mRNA	371	44.42	13	65.1061
TMA20	mRNA	546	36.91	13	65.1061
FSH1	mRNA	731	71.17	13	65.1061
SNF4	mRNA	968	37.91	13	65.1061
CWH43	mRNA	2861	44.25	13	65.1061
CLU1	mRNA	3833	28.395	12	60.098
PDX1	mRNA	1232	57.295	12	60.098
CSS2	mRNA	698	60.42	12	60.098
LTP1	mRNA	485	55.025	12	60.098
RKI1	mRNA	776	44.37	12	60.098
PIR3	mRNA	977	50.48	12	60.098
GGC1	mRNA	902	55.695	12	60.098
CUP9	mRNA	920	50.365	12	60.098
POL30	mRNA	776	52.37	12	60.098
MXR1	mRNA	554	119.14	12	60.098
ZPR1	mRNA	1460	66.07	12	60.098
CRS1	mRNA	2303	42.57	12	60.098
PEX19	mRNA	1028	29.655	12	60.098
ATG27	mRNA	815	66.525	12	60.098
TMA16	mRNA	536	38.575	12	60.098
SPO12	mRNA	521	57.55	12	60.098
VPS70	mRNA	2435	34.895	12	60.098
GLN4	mRNA	2429	26.21	12	60.098
GDA1	mRNA	1556	36.61	12	60.098
SLA1	mRNA	3734	33.575	12	60.098
SDH5	mRNA	488	54.01	12	60.098
RTF1	mRNA	1676	43.775	12	60.098
BAP3	mRNA	1814	26.69	12	60.098
PUF4	mRNA	2666	31.69	12	60.098
PUF3	mRNA	2639	46.34	12	60.098
STP4	mRNA	1472	39.555	12	60.098
RPM2	mRNA	3608	49.745	12	60.098
MRP10	mRNA	287	55.73	12	60.098
COX7	mRNA	182	45.4	12	60.098
RSM18	mRNA	416	50.365	12	60.098
YCK2	mRNA	1640	61.05	12	60.098
MAK31	mRNA	266	33.58	12	60.098
GGA2	mRNA	1757	72.365	12	60.098
FPR2	mRNA	407	70.645	12	60.098
SYG1	mRNA	2708	20.53	12	60.098
STI1	mRNA	1769	77.72	12	60.098
CNS1	mRNA	1157	39.635	12	60.098
PXR1	mRNA	815	34.49	12	60.098
PRY3	mRNA	2645	32.63	12	60.098
MES1	mRNA	2255	43.875	12	60.098
IXR1	mRNA	1793	54.91	12	60.098
GIR2	mRNA	797	52.075	12	60.098
KRE1	mRNA	941	41.76	12	60.098
GRX5	mRNA	452	36.41	12	60.098
ESF1	mRNA	1886	31.045	12	60.098
BAP2	mRNA	1829	50.695	12	60.098
QCR10	mRNA	234	85.675	12	60.098
SEC72	mRNA	581	35.145	12	60.098
RET2	mRNA	1640	41.085	12	60.098
SIN3	mRNA	4610	43.645	12	60.098
EMC1	mRNA	2282	36.845	12	60.098
ALD4	mRNA	1559	43.58	12	60.098
PBP4	mRNA	557	55.515	12	60.098
LAG1	mRNA	1235	36.005	12	60.098
MRPL51	mRNA	422	67.685	12	60.098
PRS1	mRNA	1283	43.21	12	60.098
VAN1	mRNA	1607	47.22	12	60.098
SFT1	mRNA	294	51.76	12	60.098
PUN1	mRNA	791	51	12	60.098
URA2	mRNA	6710	57.63	12	60.098
HIS5	mRNA	1157	33.855	12	60.098
RRB1	mRNA	1535	40.63	12	60.098
APS1	mRNA	470	42.36	12	60.098
MET22	mRNA	1073	59.175	12	60.098
NPT1	mRNA	1289	46.16	12	60.098
TRP2	mRNA	1523	41.975	12	60.098
YOS1	mRNA	259	58.92	12	60.098
YDR514C	mRNA	1451	38.205	12	60.098
SPP2	mRNA	557	40.445	12	60.098
GLO1	mRNA	980	42.305	12	60.098
SSU1	mRNA	1376	41.25	12	60.098
ADE3	mRNA	2840	55.605	12	60.098
LYS1	mRNA	1121	52.24	12	60.098
LSM7	mRNA	348	47.955	12	60.098
SLT2	mRNA	1454	34.105	12	60.098
ERV15	mRNA	428	20.735	12	60.098
VMA6	mRNA	1037	79.84	12	60.098
PET309	mRNA	2897	44.89	12	60.098
COX9	mRNA	179	82.39	12	60.098
GSH1	mRNA	2036	56.905	12	60.098
CYC1	mRNA	329	37.45	12	60.098
IPT1	mRNA	1583	51.915	12	60.098
PSP2	mRNA	1782	51.385	12	60.098
ITR2	mRNA	1829	48	11	55.0898
BCY1	mRNA	1250	53.15	11	55.0898
YBR016W	mRNA	386	48.5	11	55.0898
MRPL33	mRNA	260	32.04	11	55.0898
MRPL38	mRNA	416	58.42	11	55.0898
MRPL39	mRNA	212	74.89	11	55.0898
SPC3	mRNA	554	46.67	11	55.0898
SUB1	mRNA	878	60.47	11	55.0898
UIP3	mRNA	707	42	11	55.0898
BET1	mRNA	429	95.47	11	55.0898
IDH1	mRNA	1082	77.05	11	55.0898
MTC4	mRNA	2084	66.47	11	55.0898
PER1	mRNA	1073	54.08	11	55.0898
ISD11	mRNA	284	75.95	11	55.0898
MRPL23	mRNA	491	45.83	11	55.0898
GDB1	mRNA	4610	31.16	11	55.0898
GID8	mRNA	1367	51.71	11	55.0898
MRPL6	mRNA	644	31.91	11	55.0898
YFH1	mRNA	524	29.33	11	55.0898
PUP2	mRNA	782	31.15	11	55.0898
RPB7	mRNA	515	74.3	11	55.0898
SLA2	mRNA	2906	45.43	11	55.0898
CKA1	mRNA	1118	43.04	11	55.0898
ADH5	mRNA	1055	62.33	11	55.0898
SUP35	mRNA	2057	39.46	11	55.0898
YPT6	mRNA	647	27.74	11	55.0898
PMT4	mRNA	2288	42.76	11	55.0898
RPN13	mRNA	470	36.92	11	55.0898
ADE2	mRNA	1715	79.24	11	55.0898
MHF1	mRNA	272	39.7	11	55.0898
UBP7	mRNA	3215	30.58	11	55.0898
HAP1	mRNA	4508	51	11	55.0898
MNN5	mRNA	1760	29.29	11	55.0898
ACC1	mRNA	6701	36.18	11	55.0898
TRM1	mRNA	1712	50.9	11	55.0898
BDF1	mRNA	2060	30.42	11	55.0898
YPT52	mRNA	704	18.13	11	55.0898
PNO1	mRNA	824	93.06	11	55.0898
GLC3	mRNA	2114	52.57	11	55.0898
YOR131C	mRNA	656	35.55	11	55.0898
JSN1	mRNA	3275	54.14	11	55.0898
CUZ1	mRNA	824	21.68	11	55.0898
RCK2	mRNA	1832	41.68	11	55.0898
DAD4	mRNA	218	50.74	11	55.0898
SRL3	mRNA	740	80.29	11	55.0898
HRB1	mRNA	1365	27.57	11	55.0898
NCP1	mRNA	2075	29.29	11	55.0898
ROX3	mRNA	662	42.32	11	55.0898
CLB1	mRNA	1415	63.88	11	55.0898
STE6	mRNA	3872	36.27	11	55.0898
ADD66	mRNA	803	69.21	11	55.0898
MNR2	mRNA	2909	48.05	11	55.0898
DCS1	mRNA	1052	44.9	11	55.0898
ARO1	mRNA	4766	49.76	11	55.0898
HRI1	mRNA	734	50.65	11	55.0898
PAL2	mRNA	1101	44.3	11	55.0898
GPI1	mRNA	1829	40.5	11	55.0898
GPI8	mRNA	1235	61.45	11	55.0898
CNB1	mRNA	528	45.95	11	55.0898
MEH1	mRNA	554	41.4	11	55.0898
YRF1-5	mRNA	5390	62.08	11	55.0898
POR2	mRNA	845	62.95	11	55.0898
CDC53	mRNA	2447	29.62	11	55.0898
TAF14	mRNA	735	44.1	11	55.0898
IGO1	mRNA	506	103.23	11	55.0898
PKH2	mRNA	3245	35.59	11	55.0898
NAP1	mRNA	1253	52.75	11	55.0898
BUL2	mRNA	2762	47.17	11	55.0898
RPC11	mRNA	332	31.91	11	55.0898
CCT2	mRNA	1583	59.87	11	55.0898
CCT4	mRNA	1586	40.96	11	55.0898
LSB3	mRNA	1380	34.32	11	55.0898
RUB1	mRNA	234	73.16	11	55.0898
MNN11	mRNA	1268	60.59	11	55.0898
SMI1	mRNA	1517	59.28	11	55.0898
DCW1	mRNA	1349	67.8	11	55.0898
WWM1	mRNA	635	53.64	11	55.0898
LSM1	mRNA	518	56.12	11	55.0898
MRP8	mRNA	659	72	11	55.0898
GAD1	mRNA	1757	58.05	11	55.0898
IMG1	mRNA	509	29.39	11	55.0898
RRP45	mRNA	917	67.75	11	55.0898
OM45	mRNA	1181	35	11	55.0898
YPR204W	mRNA	3098	86.33	11	55.0898
AUR1	mRNA	1205	47.4	11	55.0898
YLF2	mRNA	1217	51.37	11	55.0898
UTP9	mRNA	1727	44.74	11	55.0898
RPB10	mRNA	212	90	11	55.0898
NEW1	mRNA	3590	75.85	11	55.0898
LSO2	mRNA	278	54.305	10	50.0816
ATP15	mRNA	188	62.68	10	50.0816
ORM2	mRNA	650	97.71	10	50.0816
RLP24	mRNA	599	44.22	10	50.0816
AVT7	mRNA	1472	55.29	10	50.0816
LCB3	mRNA	1229	29.81	10	50.0816
TPM2	mRNA	485	117.575	10	50.0816
WHI4	mRNA	1949	65.76	10	50.0816
PDE2	mRNA	1580	45.235	10	50.0816
LYS12	mRNA	1115	45.255	10	50.0816
TVP23	mRNA	599	45.13	10	50.0816
OST5	mRNA	261	110.645	10	50.0816
VHS2	mRNA	1310	52.955	10	50.0816
KTR6	mRNA	1340	74.435	10	50.0816
GLG1	mRNA	1850	26.855	10	50.0816
UMP1	mRNA	446	41.05	10	50.0816
PKR1	mRNA	368	54.275	10	50.0816
PYC1	mRNA	3536	51.175	10	50.0816
VIP1	mRNA	3440	46.78	10	50.0816
SRP1	mRNA	1628	50.06	10	50.0816
AYR1	mRNA	893	93.73	10	50.0816
ATG22	mRNA	1586	52.81	10	50.0816
MRPS9	mRNA	836	64.305	10	50.0816
MRPL13	mRNA	794	37.305	10	50.0816
PSG1	mRNA	1178	53.205	10	50.0816
MSN5	mRNA	3674	57.22	10	50.0816
SAC1	mRNA	1871	38.355	10	50.0816
DUT1	mRNA	443	90.185	10	50.0816
RHO2	mRNA	578	38.82	10	50.0816
ALG12	mRNA	1655	69.29	10	50.0816
UBC7	mRNA	497	37.85	10	50.0816
RIM11	mRNA	1112	63.06	10	50.0816
RPL1B	mRNA	653	89.135	10	50.0816
RSC8	mRNA	1673	46.35	10	50.0816
NCE103	mRNA	665	72.315	10	50.0816
GNP1	mRNA	1991	32.205	10	50.0816
SYH1	mRNA	2549	53.76	10	50.0816
SKP1	mRNA	584	90.595	10	50.0816
MRI1	mRNA	1235	34.76	10	50.0816
YPI1	mRNA	467	114.55	10	50.0816
INA17	mRNA	548	58.955	10	50.0816
CDC11	mRNA	1247	42.83	10	50.0816
ASG1	mRNA	2894	46.98	10	50.0816
PAN6	mRNA	929	41.35	10	50.0816
NCB2	mRNA	441	35.79	10	50.0816
NIT3	mRNA	875	58.56	10	50.0816
APL5	mRNA	2798	34.185	10	50.0816
SEC65	mRNA	821	47.65	10	50.0816
QRI1	mRNA	1433	50.48	10	50.0816
CHZ1	mRNA	461	35.18	10	50.0816
GRX3	mRNA	752	71.12	10	50.0816
PAM1	mRNA	2492	43.98	10	50.0816
MVD1	mRNA	1190	45.86	10	50.0816
RPF2	mRNA	1034	31.58	10	50.0816
YPT31	mRNA	671	34.995	10	50.0816
CDC31	mRNA	485	66.62	10	50.0816
RPN10	mRNA	806	53.475	10	50.0816
RAI1	mRNA	1163	56.745	10	50.0816
ASI1	mRNA	1874	59.715	10	50.0816
PRX1	mRNA	785	38.81	10	50.0816
RIB5	mRNA	716	39.41	10	50.0816
BOI1	mRNA	2942	50.71	10	50.0816
SSO1	mRNA	872	43.525	10	50.0816
RTC3	mRNA	335	41.205	10	50.0816
HRD1	mRNA	1655	46.245	10	50.0816
CLN3	mRNA	1742	37.77	10	50.0816
HSP12	mRNA	329	49.69	10	50.0816
PIN4	mRNA	2006	36.97	10	50.0816
RFA1	mRNA	1865	162.665	10	50.0816
SCT1	mRNA	2279	33.66	10	50.0816
TMA64	mRNA	1697	46.835	10	50.0816
NDI1	mRNA	1541	64.275	10	50.0816
TOM7	mRNA	182	37.265	10	50.0816
ESS1	mRNA	512	49.28	10	50.0816
TIR3	mRNA	809	52.57	10	50.0816
ARB1	mRNA	1832	29.78	10	50.0816
DRE2	mRNA	1046	41.5	10	50.0816
NHX1	mRNA	1901	63.925	10	50.0816
CDC3	mRNA	1562	50.215	10	50.0816
INN1	mRNA	1229	66.905	10	50.0816
YMR226C	mRNA	803	51.215	10	50.0816
PUP1	mRNA	785	60.15	10	50.0816
YGL242C	mRNA	545	37.24	10	50.0816
SNX3	mRNA	488	55.81	10	50.0816
KTR3	mRNA	1214	36.69	10	50.0816
PBN1	mRNA	1250	50.235	10	50.0816
TUP1	mRNA	2141	43.765	10	50.0816
TDA10	mRNA	872	69.945	10	50.0816
PML39	mRNA	1004	41.505	10	50.0816
PHO81	mRNA	3536	78.865	10	50.0816
CTT1	mRNA	1688	47.41	10	50.0816
SEC26	mRNA	2921	52.115	10	50.0816
YPD1	mRNA	503	50.285	10	50.0816
ALT1	mRNA	1778	78.25	10	50.0816
UBX7	mRNA	1310	50.65	10	50.0816
LRP1	mRNA	554	40.105	10	50.0816
SAP155	mRNA	3008	52.135	10	50.0816
HEM12	mRNA	1088	51.88	10	50.0816
RPA49	mRNA	1247	51.015	10	50.0816
CMS1	mRNA	875	42.025	10	50.0816
PAM16	mRNA	449	39.57	9	45.0735
SFK1	mRNA	1061	66.27	9	45.0735
ARD1	mRNA	716	41.22	9	45.0735
FCF2	mRNA	653	54.85	9	45.0735
UME1	mRNA	1382	40.12	9	45.0735
LYP1	mRNA	1835	48.13	9	45.0735
KAP123	mRNA	3341	54.13	9	45.0735
POP2	mRNA	1301	36.37	9	45.0735
RFC2	mRNA	1061	31.84	9	45.0735
ISW1	mRNA	3389	48.71	9	45.0735
ARE2	mRNA	1928	42.55	9	45.0735
RRS1	mRNA	611	34.48	9	45.0735
MGM101	mRNA	809	42.15	9	45.0735
SSD1	mRNA	3752	55.75	9	45.0735
FAU1	mRNA	635	34.37	9	45.0735
PPN1	mRNA	2024	34.84	9	45.0735
MRPL27	mRNA	440	46	9	45.0735
MRPL22	mRNA	929	39.19	9	45.0735
URE2	mRNA	1064	38.38	9	45.0735
RTK1	mRNA	1862	56.07	9	45.0735
NNR2	mRNA	1013	53.64	9	45.0735
NNR1	mRNA	740	64.08	9	45.0735
GPR1	mRNA	2885	104.15	9	45.0735
CAP2	mRNA	863	89.38	9	45.0735
MET2	mRNA	1460	25.64	9	45.0735
RPB2	mRNA	3674	63.71	9	45.0735
PRM5	mRNA	956	76.27	9	45.0735
ARC35	mRNA	1028	65.08	9	45.0735
RPA135	mRNA	3611	26.89	9	45.0735
UBC6	mRNA	752	37.91	9	45.0735
KRR1	mRNA	950	41.79	9	45.0735
PCL8	mRNA	1478	56.46	9	45.0735
PEP1	mRNA	4739	38.75	9	45.0735
IES2	mRNA	962	39.5	9	45.0735
MPM1	mRNA	758	38.77	9	45.0735
YBL028C	mRNA	320	42.6	9	45.0735
SPF1	mRNA	3647	73.82	9	45.0735
COA3	mRNA	257	30.05	9	45.0735
PSY4	mRNA	1325	37.64	9	45.0735
VPS55	mRNA	422	61.7	9	45.0735
TCB2	mRNA	3536	60.12	9	45.0735
WHI2	mRNA	1460	66.46	9	45.0735
HAS1	mRNA	1517	60.96	9	45.0735
COP1	mRNA	3605	43.88	9	45.0735
SPE1	mRNA	1400	60.23	9	45.0735
SRP68	mRNA	1799	32.9	9	45.0735
GNA1	mRNA	479	50.19	9	45.0735
NTH1	mRNA	2255	52.89	9	45.0735
GFD1	mRNA	566	87.76	9	45.0735
GLC8	mRNA	689	33.8	9	45.0735
RPC82	mRNA	1964	38.74	9	45.0735
BNA7	mRNA	785	93.91	9	45.0735
BNA1	mRNA	533	40.35	9	45.0735
RAD33	mRNA	533	154.92	9	45.0735
DAD1	mRNA	284	69.89	9	45.0735
PFK27	mRNA	1193	123.74	9	45.0735
SFA1	mRNA	1160	37.43	9	45.0735
LSG1	mRNA	1922	18.08	9	45.0735
NMD3	mRNA	1556	37.32	9	45.0735
APL2	mRNA	2180	64.24	9	45.0735
PNS1	mRNA	1619	85.88	9	45.0735
GET2	mRNA	857	97.17	9	45.0735
TPD3	mRNA	1907	52.2	9	45.0735
SME1	mRNA	284	48.86	9	45.0735
RBL2	mRNA	320	31.5	9	45.0735
ASH1	mRNA	1766	45.91	9	45.0735
ADE16	mRNA	1775	56.93	9	45.0735
IRC6	mRNA	713	89.33	9	45.0735
EMP47	mRNA	1337	37.96	9	45.0735
SSY1	mRNA	2558	49.4	9	45.0735
ARO7	mRNA	770	70.69	9	45.0735
TFB4	mRNA	1016	276.3	9	45.0735
PSF3	mRNA	584	30.77	9	45.0735
DGK1	mRNA	872	99.04	9	45.0735
EBP2	mRNA	1283	50.42	9	45.0735
YHB1	mRNA	1199	54.96	9	45.0735
OAC1	mRNA	974	57.91	9	45.0735
REE1	mRNA	596	33.31	9	45.0735
PMC1	mRNA	3521	62.04	9	45.0735
BET5	mRNA	479	73.48	9	45.0735
TIM50	mRNA	1430	42.73	9	45.0735
AIM6	mRNA	1172	61.19	9	45.0735
IZH4	mRNA	938	29.69	9	45.0735
STV1	mRNA	2672	30.17	9	45.0735
RDL2	mRNA	449	35.67	9	45.0735
RRP4	mRNA	1079	31.62	9	45.0735
RPD3	mRNA	1301	43.57	9	45.0735
YRF1-7	mRNA	5580	35.08	9	45.0735
SFB3	mRNA	2789	58.95	9	45.0735
HSE1	mRNA	1358	53.75	9	45.0735
PIN3	mRNA	647	43.29	9	45.0735
GPI17	mRNA	1604	80.93	9	45.0735
GPI11	mRNA	659	36.4	9	45.0735
SPT16	mRNA	3107	48.41	9	45.0735
COG6	mRNA	2519	88.37	9	45.0735
MTC1	mRNA	1436	35.2	9	45.0735
CHC1	mRNA	4961	39	9	45.0735
ILM1	mRNA	611	56.77	9	45.0735
MDY2	mRNA	638	56.47	9	45.0735
SPN1	mRNA	1232	49.23	9	45.0735
FET3	mRNA	1910	88	9	45.0735
UPS2	mRNA	692	43.35	9	45.0735
CST26	mRNA	1193	28.21	9	45.0735
PGA2	mRNA	389	38.37	9	45.0735
RCF1	mRNA	479	33.5	9	45.0735
FLC1	mRNA	2381	50.74	9	45.0735
GAL11	mRNA	3245	68.73	9	45.0735
UTP22	mRNA	3713	55.48	9	45.0735
RTN2	mRNA	1181	52.61	9	45.0735
MYO2	mRNA	4724	23.54	9	45.0735
IDP1	mRNA	1286	42.53	9	45.0735
SLG1	mRNA	1136	36.82	9	45.0735
RRP9	mRNA	1721	34.33	9	45.0735
CKA2	mRNA	1019	53.39	9	45.0735
INP51	mRNA	2840	42.19	9	45.0735
BST1	mRNA	3089	55.65	9	45.0735
RPT5	mRNA	1304	45.97	9	45.0735
DIC1	mRNA	896	38.58	9	45.0735
ERV2	mRNA	590	52.86	9	45.0735
MRN1	mRNA	1838	59.16	9	45.0735
CDS1	mRNA	1373	51.68	9	45.0735
YJU3	mRNA	941	44.57	9	45.0735
SWP1	mRNA	860	32.83	9	45.0735
NRG2	mRNA	662	39.27	9	45.0735
TLG1	mRNA	674	28.71	9	45.0735
ATP23	mRNA	812	29.67	9	45.0735
PRP42	mRNA	1634	70.05	9	45.0735
CPS1	mRNA	1730	19.15	9	45.0735
GCS1	mRNA	1058	29.12	9	45.0735
CPA2	mRNA	3356	39.14	9	45.0735
NUP120	mRNA	3113	49.58	9	45.0735
PPH21	mRNA	1109	80.39	9	45.0735
CKB2	mRNA	776	65.89	9	45.0735
VAC8	mRNA	1736	44.15	9	45.0735
GLE1	mRNA	1616	42.14	9	45.0735
TOM70	mRNA	1853	49.6	9	45.0735
MSA2	mRNA	1091	79.895	8	40.0653
ORM1	mRNA	668	105.205	8	40.0653
TMN2	mRNA	2018	70.78	8	40.0653
PKC1	mRNA	3455	73.44	8	40.0653
PAM17	mRNA	593	39.88	8	40.0653
CPR4	mRNA	956	52.255	8	40.0653
SOL2	mRNA	947	43.135	8	40.0653
UTP20	mRNA	7481	95.5	8	40.0653
SMD3	mRNA	305	44.24	8	40.0653
VMA21	mRNA	233	40.45	8	40.0653
SNA4	mRNA	422	70.935	8	40.0653
MSB2	mRNA	3920	71.735	8	40.0653
BSC1	mRNA	986	55.475	8	40.0653
COX15	mRNA	1460	61.44	8	40.0653
PTM1	mRNA	1571	135.12	8	40.0653
SKG1	mRNA	1067	32.155	8	40.0653
DPH2	mRNA	1604	34.595	8	40.0653
GPA2	mRNA	1349	30.54	8	40.0653
SOL4	mRNA	767	50.95	8	40.0653
GAB1	mRNA	1184	108.97	8	40.0653
NOB1	mRNA	1379	38.82	8	40.0653
MSC3	mRNA	2186	44.345	8	40.0653
PHO3	mRNA	1403	41.165	8	40.0653
EDE1	mRNA	4145	37.865	8	40.0653
MIA40	mRNA	1211	33.035	8	40.0653
PYC2	mRNA	3542	40.355	8	40.0653
NUP57	mRNA	1625	33.39	8	40.0653
BSP1	mRNA	1730	34.24	8	40.0653
EFG1	mRNA	701	46.95	8	40.0653
DIB1	mRNA	431	49.56	8	40.0653
YBL029C-A	mRNA	284	56.31	8	40.0653
CDC21	mRNA	914	52.94	8	40.0653
SNQ2	mRNA	4505	69.725	8	40.0653
MRPL10	mRNA	968	40.4	8	40.0653
SEY1	mRNA	2330	42.01	8	40.0653
SUR1	mRNA	1148	86.15	8	40.0653
CBC2	mRNA	626	74.79	8	40.0653
HUA1	mRNA	596	40.88	8	40.0653
USO1	mRNA	5372	27.305	8	40.0653
SAC6	mRNA	1929	100.735	8	40.0653
YPR127W	mRNA	1037	99.18	8	40.0653
RTT102	mRNA	473	16.705	8	40.0653
ABP1	mRNA	1778	61.4	8	40.0653
PUF6	mRNA	1970	38.905	8	40.0653
LEO1	mRNA	1394	42.31	8	40.0653
CBP6	mRNA	488	69.165	8	40.0653
MGL2	mRNA	1349	67.905	8	40.0653
RRP5	mRNA	5189	65.93	8	40.0653
ADE8	mRNA	644	79.75	8	40.0653
TFG2	mRNA	1202	38.795	8	40.0653
CPD1	mRNA	719	24.52	8	40.0653
PEX34	mRNA	434	63.98	8	40.0653
ANP1	mRNA	1502	53.725	8	40.0653
HEM2	mRNA	1028	89.35	8	40.0653
PRT1	mRNA	2291	116.4	8	40.0653
CAR1	mRNA	1001	38.75	8	40.0653
PMT6	mRNA	2279	40.03	8	40.0653
YGR054W	mRNA	1928	38.73	8	40.0653
PEX29	mRNA	1664	71.93	8	40.0653
HLJ1	mRNA	674	65.565	8	40.0653
BAR1	mRNA	1763	108.345	8	40.0653
ERP5	mRNA	638	56.895	8	40.0653
NOG2	mRNA	1461	42.925	8	40.0653
LIP5	mRNA	1244	33.235	8	40.0653
SNL1	mRNA	479	34.905	8	40.0653
SAT4	mRNA	1811	34.8	8	40.0653
MIC12	mRNA	320	39.895	8	40.0653
PAN1	mRNA	4442	35.495	8	40.0653
DPP1	mRNA	869	47.505	8	40.0653
RPA190	mRNA	4994	39.3	8	40.0653
LIP1	mRNA	452	122.47	8	40.0653
YHR138C	mRNA	344	53.84	8	40.0653
GET4	mRNA	938	66.7	8	40.0653
COA6	mRNA	314	53.81	8	40.0653
GRX4	mRNA	734	54.735	8	40.0653
YHC1	mRNA	695	58.87	8	40.0653
RSN1	mRNA	2861	42.28	8	40.0653
NNT1	mRNA	785	31.325	8	40.0653
PBP1	mRNA	2168	93.92	8	40.0653
YMR027W	mRNA	1412	73.59	8	40.0653
EMC5	mRNA	425	48.985	8	40.0653
CLA4	mRNA	2528	59.59	8	40.0653
VPS25	mRNA	608	61.065	8	40.0653
YGK1	mRNA	647	75.775	8	40.0653
NRP1	mRNA	2159	52.68	8	40.0653
YPS3	mRNA	1526	38.385	8	40.0653
YPS1	mRNA	1709	39.61	8	40.0653
STE7	mRNA	1547	52.22	8	40.0653
KEL3	mRNA	1955	45.17	8	40.0653
AAH1	mRNA	1043	46.915	8	40.0653
AEP2	mRNA	1742	46.9	8	40.0653
SXM1	mRNA	2834	58.925	8	40.0653
OPI1	mRNA	1214	70.325	8	40.0653
ESL2	mRNA	3587	87.835	8	40.0653
SEC61	mRNA	1442	42.99	8	40.0653
SEC62	mRNA	824	40.71	8	40.0653
HUL5	mRNA	2732	41.635	8	40.0653
AIM9	mRNA	1883	51.8	8	40.0653
AIM7	mRNA	449	52.36	8	40.0653
PRS2	mRNA	956	52.945	8	40.0653
RPA12	mRNA	377	28.355	8	40.0653
COQ9	mRNA	782	53.89	8	40.0653
PTC3	mRNA	1406	62.735	8	40.0653
MIG1	mRNA	1514	35.43	8	40.0653
PCL1	mRNA	839	39.69	8	40.0653
URA6	mRNA	614	107.695	8	40.0653
RRP7	mRNA	893	61.965	8	40.0653
COT1	mRNA	1319	46.49	8	40.0653
SEC12	mRNA	1415	43.37	8	40.0653
YOR1	mRNA	4433	45.325	8	40.0653
ATP12	mRNA	977	45.17	8	40.0653
NMA1	mRNA	1205	63.805	8	40.0653
MID2	mRNA	1130	46.22	8	40.0653
ECT1	mRNA	971	47.99	8	40.0653
YIP4	mRNA	707	74.53	8	40.0653
ABZ2	mRNA	1124	54.67	8	40.0653
YRA2	mRNA	611	65.285	8	40.0653
TIF4631	mRNA	2858	43.35	8	40.0653
TIF4632	mRNA	2744	58.685	8	40.0653
CDC1	mRNA	1475	31.83	8	40.0653
CTR9	mRNA	3233	49.35	8	40.0653
SER2	mRNA	929	100.675	8	40.0653
GPG1	mRNA	380	94.23	8	40.0653
SOH1	mRNA	383	21.935	8	40.0653
VRP1	mRNA	2453	69.415	8	40.0653
RTS1	mRNA	2273	37.5	8	40.0653
FET4	mRNA	1658	74.22	8	40.0653
MRP1	mRNA	965	51.43	8	40.0653
UBP10	mRNA	2378	56.79	8	40.0653
GPX2	mRNA	488	49.845	8	40.0653
RCN2	mRNA	797	61.475	8	40.0653
SEC31	mRNA	3821	28.6	8	40.0653
ISA1	mRNA	752	73.095	8	40.0653
MPC1	mRNA	392	40.845	8	40.0653
HSP82	mRNA	2129	33.88	8	40.0653
GLE2	mRNA	1097	43.495	8	40.0653
DBP9	mRNA	1784	34.795	8	40.0653
ERV29	mRNA	932	42.1	8	40.0653
MTQ1	mRNA	944	56.61	8	40.0653
HIP1	mRNA	1811	44.885	8	40.0653
TIP41	mRNA	1070	79.415	8	40.0653
DSK2	mRNA	1121	32.665	8	40.0653
YML018C	mRNA	1181	48.895	8	40.0653
RRG7	mRNA	728	89.16	8	40.0653
SEC9	mRNA	1955	33.49	8	40.0653
VMA9	mRNA	223	78.56	8	40.0653
CYC8	mRNA	2900	37.71	8	40.0653
ATX2	mRNA	941	61.72	8	40.0653
HRK1	mRNA	2279	44.195	8	40.0653
APE1	mRNA	1544	80.715	8	40.0653
IGD1	mRNA	587	42.7	8	40.0653
SPC2	mRNA	536	57.915	8	40.0653
CPA1	mRNA	1235	67.46	8	40.0653
UTP30	mRNA	824	24.69	8	40.0653
RVB2	mRNA	1415	43.875	8	40.0653
SNF8	mRNA	701	192.985	8	40.0653
TMS1	mRNA	1421	36.41	8	40.0653
CCS1	mRNA	749	39.745	8	40.0653
SKY1	mRNA	2228	60.52	8	40.0653
UTP4	mRNA	2330	35.655	8	40.0653
RPB11	mRNA	362	39.11	8	40.0653
SNT1	mRNA	3680	30.39	8	40.0653
REX2	mRNA	809	42.185	8	40.0653
DIG1	mRNA	1358	48.11	7	35.0571
MSS4	mRNA	2339	47.1	7	35.0571
ERG9	mRNA	1334	41.32	7	35.0571
SIW14	mRNA	845	50.17	7	35.0571
MRPL50	mRNA	419	175.11	7	35.0571
BUD20	mRNA	500	43	7	35.0571
RQC2	mRNA	3116	29.9	7	35.0571
DLD3	mRNA	1490	55.5	7	35.0571
ABP140	mRNA	1887	38.14	7	35.0571
CSE4	mRNA	689	92.7	7	35.0571
MTR2	mRNA	568	36.91	7	35.0571
FKH2	mRNA	2588	64	7	35.0571
MRPL32	mRNA	551	111.53	7	35.0571
RFC1	mRNA	2585	32.7	7	35.0571
MTM1	mRNA	1100	52.22	7	35.0571
AIM20	mRNA	614	49.53	7	35.0571
LCB4	mRNA	1874	94.08	7	35.0571
RSM24	mRNA	959	64.05	7	35.0571
RSM27	mRNA	332	30.86	7	35.0571
YAR1	mRNA	602	67.75	7	35.0571
UBP16	mRNA	1499	68.3	7	35.0571
EXP1	mRNA	449	63.38	7	35.0571
SFT2	mRNA	647	82.59	7	35.0571
CUS2	mRNA	857	58.72	7	35.0571
TAD2	mRNA	752	36.25	7	35.0571
CCC1	mRNA	968	43.25	7	35.0571
OST4	mRNA	110	63.87	7	35.0571
PAF1	mRNA	1337	34.5	7	35.0571
ERG12	mRNA	1331	34.83	7	35.0571
ADD37	mRNA	596	50.92	7	35.0571
ENT3	mRNA	1226	49.76	7	35.0571
HAA1	mRNA	2084	52.26	7	35.0571
HAL5	mRNA	2567	29.19	7	35.0571
BTN2	mRNA	1232	103.43	7	35.0571
DDR2	mRNA	185	77.38	7	35.0571
ECM22	mRNA	2444	155.28	7	35.0571
FMP46	mRNA	401	31.43	7	35.0571
ERG27	mRNA	1043	119.7	7	35.0571
RPO41	mRNA	4055	52.19	7	35.0571
SSA4	mRNA	1928	41.26	7	35.0571
INH1	mRNA	257	85.09	7	35.0571
ACO2	mRNA	2369	47.78	7	35.0571
RPB3	mRNA	956	93.38	7	35.0571
PAR32	mRNA	887	28.04	7	35.0571
EST3	mRNA	546	61.48	7	35.0571
TPO1	mRNA	1760	40.23	7	35.0571
ATF2	mRNA	1607	49.36	7	35.0571
AIP1	mRNA	1847	43.21	7	35.0571
YPK9	mRNA	4418	56.74	7	35.0571
UBC9	mRNA	474	58.29	7	35.0571
STP3	mRNA	1031	32.91	7	35.0571
VPS60	mRNA	689	56.13	7	35.0571
PCL7	mRNA	857	48.04	7	35.0571
HMT1	mRNA	1046	35.71	7	35.0571
SSL2	mRNA	2531	29.81	7	35.0571
STE12	mRNA	2066	53.62	7	35.0571
ADE1	mRNA	920	73.79	7	35.0571
TFG1	mRNA	2207	43.16	7	35.0571
TDA1	mRNA	1760	55	7	35.0571
PCL10	mRNA	1301	172.42	7	35.0571
PET100	mRNA	335	66.37	7	35.0571
YTA12	mRNA	2477	38.27	7	35.0571
FAD1	mRNA	920	41.55	7	35.0571
PCS60	mRNA	1631	81.3	7	35.0571
SPT6	mRNA	4355	20.95	7	35.0571
UBP1	mRNA	2429	35.52	7	35.0571
PSE1	mRNA	3269	42.48	7	35.0571
MET16	mRNA	785	80.16	7	35.0571
MNN9	mRNA	1187	35.88	7	35.0571
NOP12	mRNA	1379	40.35	7	35.0571
SSM4	mRNA	3959	38.95	7	35.0571
RER2	mRNA	860	121.59	7	35.0571
SPE4	mRNA	902	35.1	7	35.0571
EMW1	mRNA	2714	31.37	7	35.0571
PPE1	mRNA	1202	45.64	7	35.0571
APM4	mRNA	1475	39.25	7	35.0571
MOG1	mRNA	656	48.26	7	35.0571
REA1	mRNA	14732	38.4	7	35.0571
MAK21	mRNA	3077	76.19	7	35.0571
HEL2	mRNA	1919	44.32	7	35.0571
GAA1	mRNA	1844	27.19	7	35.0571
MRPS17	mRNA	713	68.21	7	35.0571
NSP1	mRNA	2472	56.76	7	35.0571
GTS1	mRNA	1190	103.92	7	35.0571
PCP1	mRNA	1040	48.41	7	35.0571
RAD27	mRNA	1148	26	7	35.0571
DSC3	mRNA	878	48.19	7	35.0571
CTR2	mRNA	569	35.5	7	35.0571
DIP2	mRNA	2831	27.54	7	35.0571
FUI1	mRNA	1919	28.55	7	35.0571
SMB1	mRNA	590	33.91	7	35.0571
NUP159	mRNA	4382	55.43	7	35.0571
UBX4	mRNA	1250	79	7	35.0571
EMG1	mRNA	758	66.21	7	35.0571
MTH1	mRNA	1301	63.8	7	35.0571
RRP15	mRNA	752	51	7	35.0571
MEP3	mRNA	1469	53.15	7	35.0571
VPS8	mRNA	3824	58.28	7	35.0571
CSI2	mRNA	1025	58.76	7	35.0571
TSC11	mRNA	4292	161.77	7	35.0571
POP8	mRNA	402	53.67	7	35.0571
PMR1	mRNA	2852	52.1	7	35.0571
USE1	mRNA	737	93.95	7	35.0571
PUT2	mRNA	1727	92.82	7	35.0571
MRS6	mRNA	1811	46.11	7	35.0571
YSP3	mRNA	1436	62.27	7	35.0571
STE4	mRNA	1271	27.85	7	35.0571
PAL1	mRNA	1499	38.37	7	35.0571
RML2	mRNA	1181	23.61	7	35.0571
BET2	mRNA	977	47.04	7	35.0571
RTC6	mRNA	281	40.7	7	35.0571
MDG1	mRNA	1100	30.2	7	35.0571
PUS1	mRNA	1634	44.65	7	35.0571
GCN2	mRNA	4979	53.65	7	35.0571
RSP5	mRNA	2429	49.71	7	35.0571
MRP7	mRNA	1115	48.13	7	35.0571
GCN1	mRNA	8018	31.14	7	35.0571
TAM41	mRNA	1157	66.48	7	35.0571
CUE3	mRNA	1874	31.33	7	35.0571
SVL3	mRNA	2477	42.22	7	35.0571
PNP1	mRNA	935	48.4	7	35.0571
OXA1	mRNA	1208	116.48	7	35.0571
FRA1	mRNA	2249	55.2	7	35.0571
BUD17	mRNA	953	43.22	7	35.0571
GON7	mRNA	371	68	7	35.0571
HIS2	mRNA	1007	47.13	7	35.0571
EAR1	mRNA	1652	82.56	7	35.0571
BOL3	mRNA	356	68.3	7	35.0571
APE2	mRNA	2859	46.17	7	35.0571
RSC4	mRNA	1877	64.92	7	35.0571
RRP12	mRNA	3686	52.83	7	35.0571
GPI13	mRNA	3053	37.92	7	35.0571
ISU1	mRNA	497	87.83	7	35.0571
NOC2	mRNA	2132	31.59	7	35.0571
IBD2	mRNA	1055	24.39	7	35.0571
YCK1	mRNA	1616	67.3	7	35.0571
YCK3	mRNA	1574	64.38	7	35.0571
ACH1	mRNA	1580	75.7	7	35.0571
IGO2	mRNA	395	68.89	7	35.0571
YTH1	mRNA	626	36.65	7	35.0571
RIX7	mRNA	2513	36.86	7	35.0571
TSR4	mRNA	1226	38.7	7	35.0571
OSM1	mRNA	1505	28.52	7	35.0571
SKN1	mRNA	2315	60.85	7	35.0571
EFM5	mRNA	748	56.38	7	35.0571
HXT1	mRNA	1712	25.31	7	35.0571
STE50	mRNA	1040	54.91	7	35.0571
NNF2	mRNA	2810	39.85	7	35.0571
REH1	mRNA	1298	72.47	7	35.0571
YAP7	mRNA	737	38.65	7	35.0571
GIM4	mRNA	336	33.12	7	35.0571
BUG1	mRNA	1025	39.33	7	35.0571
MYO5	mRNA	3659	76.5	7	35.0571
YPR148C	mRNA	1307	46.05	7	35.0571
ALG2	mRNA	1511	43.12	7	35.0571
STE24	mRNA	1361	54.37	7	35.0571
RPA43	mRNA	980	35.36	7	35.0571
MRPS16	mRNA	365	56.36	7	35.0571
PHO89	mRNA	1724	65.07	7	35.0571
CRN1	mRNA	1955	41.61	7	35.0571
GCN20	mRNA	2258	46.19	7	35.0571
CAX4	mRNA	719	35.76	7	35.0571
COX20	mRNA	617	27.83	7	35.0571
MET12	mRNA	1973	30.08	7	35.0571
TMH18	mRNA	486	41.93	7	35.0571
YJR142W	mRNA	1028	34.24	7	35.0571
MAM33	mRNA	800	50.34	7	35.0571
HIS6	mRNA	785	37.3	7	35.0571
SYN8	mRNA	767	56.7	7	35.0571
YPF1	mRNA	1763	125.64	7	35.0571
KEI1	mRNA	666	33.91	7	35.0571
TYW3	mRNA	821	60.37	7	35.0571
GMH1	mRNA	821	29.52	7	35.0571
BMS1	mRNA	3551	21.86	7	35.0571
RRP42	mRNA	797	167.28	7	35.0571
SPC1	mRNA	284	28.53	7	35.0571
DUF1	mRNA	3350	30.74	7	35.0571
PGD1	mRNA	1193	45.48	7	35.0571
BIO2	mRNA	1127	47.67	7	35.0571
STO1	mRNA	2586	28.1	7	35.0571
RBK1	mRNA	1001	40.95	7	35.0571
MRP51	mRNA	1034	49.56	7	35.0571
ARX1	mRNA	1781	59.3	6	30.049
BEM1	mRNA	1655	40.55	6	30.049
APD1	mRNA	950	62.645	6	30.049
EDC3	mRNA	1655	139.785	6	30.049
PDR12	mRNA	4535	59.81	6	30.049
RMD5	mRNA	1265	39.09	6	30.049
YHR112C	mRNA	1136	39.435	6	30.049
VTI1	mRNA	653	69.335	6	30.049
BUD25	mRNA	462	39.3	6	30.049
VMA22	mRNA	545	66	6	30.049
DLD2	mRNA	1592	32.36	6	30.049
YEH2	mRNA	1616	43.805	6	30.049
GFA1	mRNA	2153	52.75	6	30.049
CSS1	mRNA	2987	48.64	6	30.049
SNA2	mRNA	239	51.125	6	30.049
MRPL36	mRNA	533	65.535	6	30.049
MRPL37	mRNA	317	76.61	6	30.049
AST1	mRNA	1289	41.595	6	30.049
HAM1	mRNA	593	46.11	6	30.049
MSB4	mRNA	1478	44.645	6	30.049
PYK2	mRNA	1520	53.51	6	30.049
TIM9	mRNA	263	33.175	6	30.049
PRO1	mRNA	1286	28.6	6	30.049
MED2	mRNA	1295	47.45	6	30.049
EOS1	mRNA	1100	27.855	6	30.049
ISA2	mRNA	557	62.94	6	30.049
MPO1	mRNA	524	34.48	6	30.049
UTP14	mRNA	2699	25.56	6	30.049
BUD16	mRNA	938	39.46	6	30.049
SKI2	mRNA	3863	49.66	6	30.049
MIC27	mRNA	704	57.635	6	30.049
MRK1	mRNA	1506	84.18	6	30.049
SMF1	mRNA	1727	150.76	6	30.049
DPH5	mRNA	902	54.33	6	30.049
COI1	mRNA	345	52.315	6	30.049
GLO2	mRNA	824	55.515	6	30.049
FLC3	mRNA	2408	61.415	6	30.049
FLC2	mRNA	2351	61.105	6	30.049
CPR2	mRNA	617	37.715	6	30.049
TRX3	mRNA	383	40.665	6	30.049
YMC2	mRNA	989	35.865	6	30.049
HPF1	mRNA	2903	56.31	6	30.049
GCV1	mRNA	1202	104.895	6	30.049
DJP1	mRNA	1298	58.64	6	30.049
TOP2	mRNA	4286	160.73	6	30.049
BNI1	mRNA	5861	31.925	6	30.049
GRE3	mRNA	983	101.73	6	30.049
LYS21	mRNA	1322	62.685	6	30.049
SNF11	mRNA	509	42.375	6	30.049
GCD6	mRNA	2138	63.825	6	30.049
MIM2	mRNA	263	38.31	6	30.049
MLF3	mRNA	1358	49.38	6	30.049
ALB1	mRNA	527	56.795	6	30.049
MAF1	mRNA	1188	95.355	6	30.049
SRB6	mRNA	365	124.88	6	30.049
SMY2	mRNA	2222	46.075	6	30.049
MET4	mRNA	2018	39.23	6	30.049
BCH1	mRNA	2174	84.32	6	30.049
CIR1	mRNA	785	74.38	6	30.049
EMI1	mRNA	563	43.12	6	30.049
SAC3	mRNA	3905	42.265	6	30.049
SDH1	mRNA	1922	35.595	6	30.049
TRM112	mRNA	407	46.455	6	30.049
RNA14	mRNA	2033	37.59	6	30.049
ROY1	mRNA	1661	58.095	6	30.049
MRP17	mRNA	395	83.085	6	30.049
AHA1	mRNA	1052	34.07	6	30.049
UFO1	mRNA	2006	97.815	6	30.049
MEU1	mRNA	1013	23.18	6	30.049
SUS1	mRNA	292	134.975	6	30.049
SOL3	mRNA	749	37.315	6	30.049
CRG1	mRNA	875	54.14	6	30.049
INO4	mRNA	455	46.545	6	30.049
TIM44	mRNA	1295	103.3	6	30.049
RNR1	mRNA	2666	73.585	6	30.049
PEX8	mRNA	1769	42.31	6	30.049
AGA1	mRNA	2177	68.315	6	30.049
TGL1	mRNA	1646	41.49	6	30.049
TDA2	mRNA	380	36.76	6	30.049
TRM82	mRNA	1334	31.81	6	30.049
CIR2	mRNA	1895	63.58	6	30.049
MFA1	mRNA	110	113.88	6	30.049
AFG1	mRNA	1529	39.675	6	30.049
EXO5	mRNA	1757	97.545	6	30.049
RPB4	mRNA	665	73.045	6	30.049
FCF1	mRNA	569	34.515	6	30.049
PSK2	mRNA	3305	67.335	6	30.049
MNN1	mRNA	2288	73.16	6	30.049
CIT2	mRNA	1382	51.605	6	30.049
YAH1	mRNA	518	38.715	6	30.049
PEX22	mRNA	542	76.57	6	30.049
TGL4	mRNA	2732	39.73	6	30.049
RAD14	mRNA	1116	75.3	6	30.049
RSM7	mRNA	743	43.685	6	30.049
ODC2	mRNA	923	40.015	6	30.049
HGH1	mRNA	1184	28.465	6	30.049
PRM7	mRNA	2096	76.92	6	30.049
RAD17	mRNA	1205	71.315	6	30.049
PWP1	mRNA	1730	22.89	6	30.049
PLB3	mRNA	2060	57.345	6	30.049
DAK1	mRNA	1754	58.525	6	30.049
DOA1	mRNA	2147	32.775	6	30.049
HOT13	mRNA	350	36.285	6	30.049
ILT1	mRNA	932	60.975	6	30.049
RRP36	mRNA	902	39.3	6	30.049
NUT1	mRNA	3398	36.595	6	30.049
NPL4	mRNA	1742	34.005	6	30.049
DAD2	mRNA	401	57.625	6	30.049
MNS1	mRNA	1649	46.27	6	30.049
AOS1	mRNA	1043	44.63	6	30.049
VPS4	mRNA	1313	25.705	6	30.049
AME1	mRNA	974	54.35	6	30.049
COQ1	mRNA	1421	47.495	6	30.049
CPT1	mRNA	1182	38.6	6	30.049
TFA1	mRNA	1448	33.56	6	30.049
PET123	mRNA	956	93.41	6	30.049
OPY1	mRNA	986	33.72	6	30.049
APL4	mRNA	2498	30.91	6	30.049
DIM1	mRNA	956	28.125	6	30.049
GDE1	mRNA	3671	47.77	6	30.049
CAB2	mRNA	1097	96.235	6	30.049
MRP21	mRNA	533	38.84	6	30.049
MHP1	mRNA	4196	43.19	6	30.049
TIM23	mRNA	668	39.125	6	30.049
GIS1	mRNA	2684	53.565	6	30.049
TIM21	mRNA	719	31.935	6	30.049
TFB5	mRNA	218	46.755	6	30.049
PDR3	mRNA	2930	60.955	6	30.049
ALK1	mRNA	2282	25.955	6	30.049
MAK3	mRNA	530	38.06	6	30.049
YMR114C	mRNA	1106	110.73	6	30.049
PAN3	mRNA	2039	52.065	6	30.049
KEL1	mRNA	3494	28.515	6	30.049
LRO1	mRNA	1985	39.23	6	30.049
DLS1	mRNA	503	38.185	6	30.049
OPI3	mRNA	620	124.605	6	30.049
SWM1	mRNA	512	58.73	6	30.049
TRR2	mRNA	1028	44.415	6	30.049
MGA2	mRNA	3341	50.87	6	30.049
PRO2	mRNA	1370	74.685	6	30.049
[truncated: 2,551 more rows]

## Sheet: PolyAPolyI_3
Feature name	Feature type	Feature length	Feature median tail length	number of reads	RPM
tP_28UGG_29O1	tRNA	72	52.995	12	60.1851
tV_28AAC_29O	tRNA	73	72.48	5	25.0771
tV_28AAC_29G3	tRNA	73	65.4	4	20.0617
tK_28CUU_29C	tRNA	72	51.83	3	15.0463
SOE1	tRNA	71	64.67	3	15.0463
tK_28UUU_29P	tRNA	73	56.155	2	10.0308
tH_28GUG_29E2	tRNA	71	48.79	2	10.0308
tE_28UUC_29K	tRNA	71	60.63	2	10.0308
tT_28AGU_29I1	tRNA	72	59.42	1	5.01542
tRNA-Phe	tRNA	804	56.96	1	5.01542
tV_28CAC_29D	tRNA	72	63.27	1	5.01542
tT_28AGU_29N1	tRNA	72	58.92	1	5.01542
tK_28UUU_29D	tRNA	73	80.44	1	5.01542
tV_28UAC_29D	tRNA	73	70.58	1	5.01542
tW_28CCA_29P	tRNA	72	171.28	1	5.01542
tE_28UUC_29E1	tRNA	71	34.67	1	5.01542
tT_28UGU_29P	tRNA	71	61	1	5.01542
tD_28GUC_29I1	tRNA	71	38.96	1	5.01542
tD_28GUC_29B	tRNA	71	56.85	1	5.01542
tW_28CCA_29G1	tRNA	72	53.82	1	5.01542
tA_28AGC_29K1	tRNA	72	38.26	1	5.01542
tK_28CUU_29M	tRNA	72	53.53	1	5.01542
tV_28AAC_29K2	tRNA	73	48.52	1	5.01542
tE_28UUC_29J	tRNA	71	43.26	1	5.01542
tN_28GUU_29K	tRNA	73	163.44	1	5.01542
tH_28GUG_29E1	tRNA	71	60.48	1	5.01542
EMT2	tRNA	72	64.04	1	5.01542
tA_28AGC_29L	tRNA	72	49.36	1	5.01542
tH_28GUG_29G1	tRNA	71	41.07	1	5.01542
tG_28GCC_29G1	tRNA	70	356.79	1	5.01542
SUP16	tRNA	81	60.07	1	5.01542
SUP19	tRNA	81	72.32	1	5.01542
tE_28UUC_29P	tRNA	71	99.12	1	5.01542
tS_28AGA_29B	tRNA	81	61.28	1	5.01542
tT_28AGU_29O2	tRNA	72	62.3	1	5.01542
tD_28GUC_29N	tRNA	70	56.07	1	5.01542
tH_28GUG_29H	tRNA	71	64	1	5.01542
tN_28GUU_29L	tRNA	73	336.11	1	5.01542
tG_28GCC_29F2	tRNA	70	26.64	1	5.01542
tI_28AAU_29E2	tRNA	73	35.93	1	5.01542
gag-pol_20fusion_20protein	transposable_element	217730	56.38	622	3119.59
gag_20protein	transposable_element	53095	57.69	91	456.403
YOR343C-B	transposable_element	5313	61.33	66	331.018
YARCTyA1-1	transposable_element	1322	32.68	1	5.01542
TY2B_B	transposable_element	5313	61.41	1	5.01542
YDR210W-C	transposable_element	1322	10.96	1	5.01542
TLC1	telomerase_RNA	1300	80.58	28	140.432
LSR1	snRNA	1174	40.38	11	55.1696
SNR19	snRNA	567	73.11	4	20.0617
SNR24	snoRNA	88	50.61	687	3445.6
SNR39	snoRNA	88	60.225	334	1675.15
SNR18	snoRNA	101	50.25	303	1519.67
SNR44	snoRNA	210	63.33	237	1188.66
SNR59	snoRNA	77	52.22	235	1178.62
SNR38	snoRNA	94	55.29	169	847.606
SNR191	snoRNA	273	65.23	64	320.987
SNR43	snoRNA	208	60.935	32	160.494
SNR84	snoRNA	549	69.48	19	95.293
SNR63	snoRNA	254	60.22	15	75.2313
SNR17B	snoRNA	332	73.73	15	75.2313
SNR33	snoRNA	182	72.76	13	65.2005
SNR4	snoRNA	185	69.18	11	55.1696
SNR9	snoRNA	186	66.42	9	45.1388
SNR41	snoRNA	94	62.8	9	45.1388
SNR42	snoRNA	350	45.95	9	45.1388
SNR86	snoRNA	1003	75.35	9	45.1388
SNR49	snoRNA	164	87.6	7	35.108
SNR31	snoRNA	224	76.52	7	35.108
SNR35	snoRNA	203	53.065	6	30.0925
SNR5	snoRNA	203	62.62	5	25.0771
SNR75	snoRNA	88	54.16	5	25.0771
SNR30	snoRNA	605	80.3	5	25.0771
SNR10	snoRNA	244	59.59	5	25.0771
SNR37	snoRNA	385	54.52	5	25.0771
SNR32	snoRNA	187	73.15	5	25.0771
SNR67	snoRNA	81	50.805	4	20.0617
SNR82	snoRNA	267	108.73	4	20.0617
SNR57	snoRNA	87	81.415	4	20.0617
SNR68	snoRNA	135	73.12	4	20.0617
SNR11	snoRNA	257	114.65	3	15.0463
SNR66	snoRNA	85	50.09	3	15.0463
SNR56	snoRNA	87	62.52	3	15.0463
SNR58	snoRNA	95	66.33	3	15.0463
SNR3	snoRNA	193	53.48	3	15.0463
SNR61	snoRNA	89	64.71	3	15.0463
SNR60	snoRNA	103	57.33	3	15.0463
SNR83	snoRNA	305	69.45	3	15.0463
SNR87	snoRNA	108	72.36	3	15.0463
SNR128	snoRNA	125	101.48	3	15.0463
SNR55	snoRNA	97	145.925	2	10.0308
SNR17A	snoRNA	333	56.17	2	10.0308
SNR39B	snoRNA	95	75.985	2	10.0308
SNR190	snoRNA	189	58.56	1	5.01542
SNR80	snoRNA	170	63.74	1	5.01542
SNR85	snoRNA	170	54.96	1	5.01542
SNR50	snoRNA	89	91.05	1	5.01542
SNR8	snoRNA	189	89.41	1	5.01542
SNR47	snoRNA	98	96.92	1	5.01542
SNR78	snoRNA	86	183.41	1	5.01542
SNR64	snoRNA	100	40.27	1	5.01542
SNR161	snoRNA	160	25.65	1	5.01542
SNR34	snoRNA	202	176.74	1	5.01542
SNR36	snoRNA	181	28.88	1	5.01542
SNR70	snoRNA	163	53.18	1	5.01542
RDN25-2	rRNA	3395	54.445	434	2176.69
RDN18-2	rRNA	1799	45	373	1870.75
RDN5-2	rRNA	118	45.77	37	185.571
ETS1-2	rRNA	699	50.64	35	175.54
NTS2-2	rRNA	1242	50.09	15	75.2313
RDN58-2	rRNA	157	49.805	6	30.0925
ITS1-2	rRNA	0	36.75	5	25.0771
NTS1-2	rRNA	914	53.125	4	20.0617
RDN37-2	rRNA	6266	17.27	3	15.0463
NTS2-1	rRNA	1242	55.74	1	5.01542
ITS2-2	rRNA	0	67.92	1	5.01542
RDN5-5	rRNA	118	59.13	1	5.01542
RDN5-6	rRNA	120	57.96	1	5.01542
RUF21	ncRNA	706	50.67	41	205.632
RUF20	ncRNA	442	52.74	21	105.324
SCR1	ncRNA	521	52.65	6	30.0925
SRG1	ncRNA	550	71.765	4	20.0617
IRT1	ncRNA	1488	62.235	4	20.0617
RPR1	ncRNA	368	28.68	3	15.0463
RUF5-2	ncRNA	709	51.645	2	10.0308
RUF23	ncRNA	253	62.54	1	5.01542
RME2	ncRNA	2222	55.86	1	5.01542
RUF5-1	ncRNA	709	73.79	1	5.01542
RME3	ncRNA	1904	80.3	1	5.01542
TEF1	mRNA	1376	58.7	3800	19058.6
RPS12	mRNA	431	55.1	2209	11079.1
RPS31	mRNA	458	45.57	2177	10918.6
PDC1	mRNA	1691	60.09	1817	9113.02
TDH2	mRNA	998	61.64	1809	9072.9
FBA1	mRNA	1079	58.83	1802	9037.79
CCW12	mRNA	401	59.56	1700	8526.22
ENO2	mRNA	1313	62.14	1638	8215.26
ADH1	mRNA	1046	60.92	1470	7372.67
RPL28	mRNA	450	49.47	1450	7272.36
RPS8B	mRNA	610	58.53	1436	7202.15
RPL1A	mRNA	653	53.5	1220	6118.82
GPM1	mRNA	743	46.91	1191	5973.37
RPS2	mRNA	764	52.8	1135	5692.5
RPS4A	mRNA	786	50.055	1134	5687.49
RPL25	mRNA	429	62.37	1119	5612.26
RPS5	mRNA	677	58.96	1117	5602.23
RPS6A	mRNA	711	59.32	1116	5597.21
CDC19	mRNA	1502	60.34	1086	5446.75
RPS25A	mRNA	342	63.845	1082	5426.69
RPS20	mRNA	365	51.14	1078	5406.63
RPS9B	mRNA	588	46.675	1052	5276.22
RPS3	mRNA	722	53.12	1009	5060.56
RPL10	mRNA	665	59.41	1009	5060.56
RPL32	mRNA	393	54.5	986	4945.21
RPS23B	mRNA	438	51.76	967	4849.91
TPI1	mRNA	746	56.82	950	4764.65
RPL38	mRNA	236	50.36	945	4739.57
RPL18A	mRNA	561	57.725	930	4664.34
RPL26B	mRNA	384	55.96	897	4498.83
RPL40A	mRNA	387	53.02	886	4443.66
RPS13	mRNA	456	53.155	886	4443.66
RPL36B	mRNA	303	56.7	874	4383.48
RPS26A	mRNA	370	48.63	869	4358.4
RPL30	mRNA	318	44.55	865	4338.34
TMA19	mRNA	503	59.155	844	4233.02
RPL11A	mRNA	524	49.37	813	4077.54
RPS24A	mRNA	408	58.585	808	4052.46
RPS21B	mRNA	264	39.24	800	4012.34
RPL3	mRNA	1163	62.34	796	3992.28
TDH3	mRNA	998	61.85	793	3977.23
RPL23B	mRNA	414	62.28	778	3902
RPL43A	mRNA	279	41.92	778	3902
RPL14A	mRNA	417	50.58	771	3866.89
RPL35B	mRNA	363	55.49	754	3781.63
RPS15	mRNA	428	61.105	754	3781.63
RPS30A	mRNA	192	60.19	746	3741.51
RPP1B	mRNA	321	59.06	746	3741.51
RPP0	mRNA	938	54.32	743	3726.46
RPS1B	mRNA	767	57.16	730	3661.26
RPP2A	mRNA	320	50.89	724	3631.17
RPS17A	mRNA	411	58.48	720	3611.1
RPL33A	mRNA	324	61.005	712	3570.98
RPS18A	mRNA	441	51	712	3570.98
RPS14A	mRNA	414	41.225	706	3540.89
RPL40B	mRNA	387	56.81	693	3475.69
RPL2A	mRNA	765	53.78	692	3470.67
RPL15A	mRNA	614	63.52	688	3450.61
RPS22A	mRNA	392	53.345	688	3450.61
RPL5	mRNA	893	54.525	676	3390.43
RPS23A	mRNA	438	59.65	675	3385.41
PGK1	mRNA	1250	58.64	675	3385.41
RPL37B	mRNA	267	55.61	673	3375.38
RPL27A	mRNA	411	49.22	669	3355.32
RPL42A	mRNA	321	52.68	653	3275.07
RPS28A	mRNA	203	55.405	648	3249.99
RPL19B	mRNA	570	46.98	640	3209.87
RPL31A	mRNA	342	54.46	631	3164.73
RPL16B	mRNA	597	50.3	625	3134.64
RPS21A	mRNA	264	63.35	625	3134.64
SSB2	mRNA	1841	53.76	625	3134.64
RPL34B	mRNA	366	46.86	624	3129.62
RPS17B	mRNA	411	62.4	623	3124.61
RPS18B	mRNA	441	58.57	622	3119.59
RPL9A	mRNA	575	44	617	3094.52
RPL21B	mRNA	483	62.395	616	3089.5
RPL21A	mRNA	483	58.53	614	3079.47
RPL2B	mRNA	765	64.385	612	3069.44
RPL12B	mRNA	497	56.83	605	3034.33
CWP2	mRNA	278	69.83	602	3019.28
HHT2	mRNA	410	56.205	600	3009.25
RPS19B	mRNA	435	52.54	595	2984.18
HTA1	mRNA	398	58.335	590	2959.1
RPP1A	mRNA	320	37.745	590	2959.1
RPL42B	mRNA	321	53.065	582	2918.98
RPS16A	mRNA	432	56	581	2913.96
RPL8B	mRNA	770	48.26	581	2913.96
RPL22A	mRNA	366	44.96	573	2873.84
RPL20B	mRNA	519	57.04	571	2863.81
RPP2B	mRNA	332	43.33	563	2823.68
HHT1	mRNA	410	67.1	562	2818.67
RPL24A	mRNA	475	53.48	561	2813.65
RPS19A	mRNA	435	58.62	557	2793.59
RPS7A	mRNA	573	41.255	556	2788.57
RPL13B	mRNA	600	43.2	547	2743.44
RPS10A	mRNA	318	68.095	544	2728.39
RPL23A	mRNA	414	57.22	524	2628.08
RPS16B	mRNA	432	54.73	522	2618.05
RPS30B	mRNA	192	69.64	519	2603
RPS1A	mRNA	767	59.3	514	2577.93
RPL37A	mRNA	267	59.38	505	2532.79
RPL41A	mRNA	77	56.31	504	2527.77
HHF1	mRNA	311	69.34	502	2517.74
RPL24B	mRNA	475	52.94	500	2507.71
RPL17A	mRNA	555	54.205	484	2427.46
RPL4B	mRNA	1088	55	483	2422.45
RPL6A	mRNA	531	49.245	480	2407.4
HTA2	mRNA	398	54.12	470	2357.25
RPS27B	mRNA	249	54.78	452	2266.97
RPL12A	mRNA	497	58.625	452	2266.97
STM1	mRNA	821	56.35	451	2261.96
RPL43B	mRNA	279	57.535	438	2196.76
RPS0A	mRNA	759	61	431	2161.65
RPL20A	mRNA	519	56.775	426	2136.57
YEF3	mRNA	3134	62.21	411	2061.34
RPS10B	mRNA	318	53.325	404	2026.23
PSA1	mRNA	1085	63.1	392	1966.05
RPS11A	mRNA	471	50.62	389	1951
TIF1	mRNA	1187	64.68	383	1920.91
RPS26B	mRNA	360	53.84	381	1910.88
RPS0B	mRNA	759	56.04	377	1890.81
NKP1	mRNA	716	50.96	375	1880.78
RPL26A	mRNA	384	44.12	371	1860.72
RPL29	mRNA	183	52.82	364	1825.61
RPL19A	mRNA	570	43.76	359	1800.54
HTB1	mRNA	395	63.21	359	1800.54
RPS11B	mRNA	471	48.92	358	1795.52
ZEO1	mRNA	341	76.25	356	1785.49
RPL34A	mRNA	366	48.58	355	1780.47
RPL16A	mRNA	600	54.29	353	1770.44
RPS29B	mRNA	183	59.5	346	1735.34
CPR1	mRNA	488	46.92	345	1730.32
RPS29A	mRNA	176	50.62	343	1720.29
TSA1	mRNA	590	64.88	337	1690.2
EFT1	mRNA	2528	60.595	336	1685.18
RPS25B	mRNA	340	55.9	334	1675.15
RPL39	mRNA	156	41.29	333	1670.14
EGD2	mRNA	524	55.735	330	1655.09
RPL14B	mRNA	417	62.78	330	1655.09
GPP1	mRNA	752	65.21	329	1650.07
RPL13A	mRNA	600	57.42	325	1630.01
RPL27B	mRNA	411	55.605	324	1625
RPL33B	mRNA	324	65.62	315	1579.86
HYP2	mRNA	473	59.95	310	1554.78
BMH1	mRNA	803	50.865	308	1544.75
EFB1	mRNA	621	53.25	308	1544.75
HTB2	mRNA	395	59.32	307	1539.73
RPL17B	mRNA	555	58.22	295	1479.55
HXT3	mRNA	1703	66.12	290	1454.47
RPL41B	mRNA	77	47.59	289	1449.46
AHP1	mRNA	530	50.08	284	1424.38
EGD1	mRNA	473	65.48	282	1414.35
RPS27A	mRNA	249	59.89	271	1359.18
ARF1	mRNA	545	49.445	268	1344.13
GSP1	mRNA	659	54.87	256	1283.95
RPL11B	mRNA	524	49.72	253	1268.9
SSA2	mRNA	1919	55.47	246	1233.79
URA1	mRNA	944	60.15	242	1213.73
SOD1	mRNA	464	50.16	240	1203.7
GAS1	mRNA	1679	68.115	238	1193.67
RPL6B	mRNA	531	60.87	235	1178.62
CUP1-2	mRNA	185	61.46	231	1158.56
RPS28B	mRNA	203	54.125	230	1153.55
SNU13	mRNA	380	66.04	229	1148.53
PMA1	mRNA	2756	75.98	226	1133.49
RPL35A	mRNA	363	55.92	225	1128.47
GCN4	mRNA	845	77.44	225	1128.47
PMP2	mRNA	131	69.8	225	1128.47
ACT1	mRNA	1128	54.755	224	1123.45
RPS7B	mRNA	573	60.455	224	1123.45
GIS2	mRNA	461	56.855	222	1113.42
VMA3	mRNA	482	64.52	217	1088.35
HSC82	mRNA	2117	52.88	215	1078.32
KTR5	mRNA	1568	65.44	210	1053.24
RPL31B	mRNA	342	48.02	208	1043.21
MMF1	mRNA	437	56.4	205	1028.16
CIS3	mRNA	683	66.28	200	1003.08
COF1	mRNA	432	55.49	197	988.038
RPL8A	mRNA	770	57.48	195	978.007
HHF2	mRNA	311	56.155	192	962.961
SUI1	mRNA	326	61.91	189	947.915
FPR1	mRNA	344	54.23	189	947.915
PGI1	mRNA	1664	59.52	189	947.915
RPS24B	mRNA	408	50.14	187	937.884
NOP1	mRNA	983	55.425	184	922.838
PMP1	mRNA	122	68.93	182	912.807
RPL36A	mRNA	303	36.925	180	902.776
YRB1	mRNA	605	53.56	180	902.776
CHA1	mRNA	1082	57.42	177	887.73
SUB2	mRNA	1340	55.01	176	882.714
NSR1	mRNA	1244	52.81	176	882.714
ILV5	mRNA	1187	77.6	169	847.606
NOP10	mRNA	176	57.07	167	837.576
ECM33	mRNA	1290	68.625	166	832.56
UTH1	mRNA	1097	84.3	161	807.483
CDC33	mRNA	641	55.405	160	802.468
PHO84	mRNA	1763	71.65	159	797.452
APE3	mRNA	1613	47.5	157	787.421
CTS1	mRNA	1688	72.935	156	782.406
FCY2	mRNA	1601	59.75	155	777.39
BGL2	mRNA	941	65.595	152	762.344
SEC53	mRNA	764	70.12	151	757.329
TIF11	mRNA	461	50.04	151	757.329
ADK1	mRNA	668	58.48	150	752.313
PMP3	mRNA	167	73.83	148	742.283
RPL9B	mRNA	575	56.26	147	737.267
HXK2	mRNA	1460	72.045	146	732.252
MRH1	mRNA	962	87.465	146	732.252
NHP2	mRNA	470	64.155	144	722.221
TIF3	mRNA	1310	57.25	144	722.221
ACB1	mRNA	263	54.65	143	717.205
HPT1	mRNA	665	60.62	142	712.19
TIF5	mRNA	1217	53.09	141	707.175
GAR1	mRNA	617	59.16	141	707.175
KRS1	mRNA	1775	46.935	138	692.128
RPL7B	mRNA	736	52.75	138	692.128
HSP150	mRNA	1241	78.53	136	682.097
OLA1	mRNA	1184	55.05	135	677.082
DBP2	mRNA	1641	54.21	135	677.082
GUK1	mRNA	563	49.62	134	672.067
NOP56	mRNA	1514	61.04	130	652.005
SND3	mRNA	566	48.525	130	652.005
FCY1	mRNA	476	57.46	129	646.989
THS1	mRNA	2204	56.355	128	641.974
VTC1	mRNA	389	58.175	128	641.974
IPP1	mRNA	863	41.98	126	631.943
SUP45	mRNA	1313	48.4	125	626.928
CYS4	mRNA	1523	62.345	124	621.912
TRX2	mRNA	314	62.93	123	616.897
SAH1	mRNA	1349	63.41	123	616.897
EXG1	mRNA	1346	62.84	123	616.897
TRX1	mRNA	311	54.1	123	616.897
YDJ1	mRNA	1229	56.2	119	596.835
ASP3-4	mRNA	1088	52.79	118	591.82
UBC4	mRNA	447	52.765	118	591.82
YER010C	mRNA	704	59.96	117	586.804
ZUO1	mRNA	1301	48.335	116	581.789
PFY1	mRNA	381	56.445	114	571.758
GLN1	mRNA	1112	68.11	114	571.758
IMD4	mRNA	1575	60.83	114	571.758
HXT1	mRNA	1712	62.3	113	566.743
SSE1	mRNA	2081	61.21	113	566.743
TKL1	mRNA	2042	63.23	112	561.727
ADE13	mRNA	1448	58.565	112	561.727
ERG3	mRNA	1097	68.56	111	556.712
PDI1	mRNA	1568	57.105	110	551.696
TMA7	mRNA	194	54.1	109	546.681
RPL18B	mRNA	561	58.08	109	546.681
DED81	mRNA	1664	49.54	109	546.681
VMA4	mRNA	701	46.33	109	546.681
ELO3	mRNA	1037	59.12	106	531.635
ASC1	mRNA	960	56.06	106	531.635
GUA1	mRNA	1577	54.82	106	531.635
BAT1	mRNA	1181	64.705	106	531.635
MBF1	mRNA	455	58.9	105	526.619
ARO4	mRNA	1112	64.81	104	521.604
RIB4	mRNA	509	43.135	104	521.604
TRR1	mRNA	959	54	104	521.604
ADO1	mRNA	1022	58.85	103	516.589
ERG6	mRNA	1151	49.56	103	516.589
LIA1	mRNA	977	62.235	102	511.573
SUI3	mRNA	857	54.79	102	511.573
HIS1	mRNA	893	47.185	102	511.573
SES1	mRNA	1388	51.925	102	511.573
SSS1	mRNA	242	58.16	102	511.573
SCW10	mRNA	1169	71.95	101	506.558
MRT4	mRNA	710	60.6	99	496.527
RPB8	mRNA	440	60.85	97	486.496
VOA1	mRNA	797	64.55	97	486.496
TEF4	mRNA	1239	57.54	97	486.496
ARC1	mRNA	1130	57.235	96	481.481
TIF35	mRNA	824	47.18	96	481.481
RBG1	mRNA	1109	50.96	95	476.465
SSZ1	mRNA	1616	49.83	95	476.465
MIC26	mRNA	701	59.92	95	476.465
ALD6	mRNA	1502	59.78	95	476.465
SRL1	mRNA	632	71.9	94	471.45
OYE2	mRNA	1202	60.25	93	466.434
YRA1	mRNA	681	54.815	92	461.419
ADH3	mRNA	1127	49.81	91	456.403
ARO2	mRNA	1130	52.04	91	456.403
TYS1	mRNA	1184	52.83	90	451.388
NPL3	mRNA	1244	63.38	90	451.388
ILV3	mRNA	1757	63.475	90	451.388
SBA1	mRNA	650	57.855	90	451.388
ERG2	mRNA	668	66.87	89	446.373
ASN1	mRNA	1718	54.46	89	446.373
SAM1	mRNA	1148	59.84	89	446.373
MPC2	mRNA	389	53.46	89	446.373
GDH1	mRNA	1364	43.78	89	446.373
TOS1	mRNA	1367	67.7	88	441.357
ATP4	mRNA	734	52.43	88	441.357
NUG1	mRNA	1562	57.045	88	441.357
RRB1	mRNA	1535	53.13	88	441.357
ERG11	mRNA	1592	67.88	87	436.342
SMT3	mRNA	305	42.17	87	436.342
PYP1	mRNA	725	49.855	86	431.326
UTR2	mRNA	1403	57.97	85	426.311
DSE2	mRNA	977	98.22	85	426.311
ILS1	mRNA	3218	60.75	85	426.311
VMA10	mRNA	345	43.635	84	421.295
YPT1	mRNA	620	46	83	416.28
RTN1	mRNA	887	66.71	83	416.28
TIP1	mRNA	632	70.12	83	416.28
SED1	mRNA	1016	72.46	82	411.265
LHP1	mRNA	827	58.405	82	411.265
CCT3	mRNA	1604	46.005	82	411.265
SAM4	mRNA	977	56.67	82	411.265
SSB1	mRNA	1841	56.655	82	411.265
GRS1	mRNA	2003	57.27	82	411.265
ATP18	mRNA	179	56.7	81	406.249
HOM6	mRNA	1079	44.68	81	406.249
SND2	mRNA	545	49.24	81	406.249
STE2	mRNA	1295	71.495	80	401.234
TIM10	mRNA	281	58.24	79	396.218
HSP10	mRNA	320	53	79	396.218
IMD3	mRNA	1571	57.5	79	396.218
RPS4B	mRNA	786	55.4	79	396.218
TAL1	mRNA	1007	51.46	79	396.218
NIP7	mRNA	545	60.92	79	396.218
ASN2	mRNA	1718	54.83	79	396.218
SBH2	mRNA	266	46.65	78	391.203
SGT2	mRNA	1040	57.26	78	391.203
PRS1	mRNA	1283	59.105	78	391.203
HOR7	mRNA	179	63.46	77	386.188
GND1	mRNA	1469	60.03	77	386.188
ERG10	mRNA	1196	54.78	76	381.172
EMP24	mRNA	611	52.965	76	381.172
CAF20	mRNA	485	64.64	76	381.172
ERV14	mRNA	416	57.42	76	381.172
VMA11	mRNA	494	50.23	76	381.172
YOP1	mRNA	543	56.22	75	376.157
YLR162W	mRNA	356	68.33	75	376.157
RPC10	mRNA	212	61	75	376.157
RPB10	mRNA	212	58.25	75	376.157
GET3	mRNA	1064	46.28	74	371.141
HMO1	mRNA	740	57.285	74	371.141
RNR4	mRNA	1037	54.39	74	371.141
VMA16	mRNA	641	57.01	74	371.141
NTF2	mRNA	377	58	73	366.126
RPS14B	mRNA	417	58.56	73	366.126
ENO1	mRNA	1313	63.81	73	366.126
URA7	mRNA	1739	58.05	73	366.126
SRP14	mRNA	440	60.64	73	366.126
NOP58	mRNA	1535	65.68	72	361.11
FPR4	mRNA	1178	48.96	71	356.095
PET9	mRNA	956	59.72	71	356.095
HXT2	mRNA	1625	68.53	71	356.095
SHR3	mRNA	632	44.935	70	351.08
NOP7	mRNA	1817	49.04	70	351.08
PIR1	mRNA	1025	73.93	70	351.08
SAR1	mRNA	573	48.705	70	351.08
CBF5	mRNA	1451	50.9	70	351.08
CMD1	mRNA	443	56.32	70	351.08
ATP2	mRNA	1535	57.68	70	351.08
APT1	mRNA	563	65.64	70	351.08
TIF34	mRNA	1043	49.25	69	346.064
NCE102	mRNA	521	73.73	69	346.064
SRP40	mRNA	1220	63.575	68	341.049
GLY1	mRNA	1163	79.19	68	341.049
FAA4	mRNA	2084	60.095	68	341.049
CCW14	mRNA	716	71.01	68	341.049
BRX1	mRNA	875	50.2	68	341.049
ARF2	mRNA	585	49.59	67	336.033
RPF2	mRNA	1034	52.86	67	336.033
KAR2	mRNA	2048	59.61	67	336.033
RHO1	mRNA	629	53.225	66	331.018
PFK1	mRNA	2963	63.17	66	331.018
AAH1	mRNA	1043	60.095	66	331.018
SUI2	mRNA	914	61.27	66	331.018
PDB1	mRNA	1100	51.725	66	331.018
CYS3	mRNA	1184	53.54	65	326.002
GUS1	mRNA	2126	46	65	326.002
HMT1	mRNA	1046	64.22	64	320.987
RPN8	mRNA	1016	50.42	64	320.987
SML1	mRNA	314	75.665	64	320.987
PAB1	mRNA	1733	69.485	64	320.987
SVF1	mRNA	1445	56.865	64	320.987
RPE1	mRNA	716	52.875	64	320.987
MIX17	mRNA	470	62.775	64	320.987
GBP2	mRNA	1283	47.82	64	320.987
CPR6	mRNA	1115	52.46	63	315.972
CAM1	mRNA	1247	52.73	63	315.972
YBL028C	mRNA	320	57.65	63	315.972
SQT1	mRNA	1295	56.6	63	315.972
SHB17	mRNA	815	50.34	63	315.972
VTC3	mRNA	2507	54.48	63	315.972
INA1	mRNA	2027	69.31	63	315.972
ADE5_2C7	mRNA	2408	53.93	63	315.972
VMA7	mRNA	356	56.4	63	315.972
ERG25	mRNA	929	53.215	62	310.956
RPL1B	mRNA	653	50.375	62	310.956
PIL1	mRNA	1019	63.095	62	310.956
TAT1	mRNA	1859	65.4	62	310.956
FUR1	mRNA	650	62.945	62	310.956
CPR5	mRNA	677	49.68	61	305.941
RPO26	mRNA	468	64.96	61	305.941
ERV25	mRNA	635	47.76	61	305.941
FRS1	mRNA	1787	62	61	305.941
ELO2	mRNA	1043	66.57	61	305.941
GDT1	mRNA	842	58	61	305.941
GLC7	mRNA	939	57.87	61	305.941
DPS1	mRNA	1673	47.93	61	305.941
TIF6	mRNA	737	66.83	61	305.941
VAS1	mRNA	3314	60.83	61	305.941
HOM2	mRNA	1097	63.48	61	305.941
DBP3	mRNA	1571	57.39	61	305.941
SBP1	mRNA	884	52.56	60	300.925
PRT1	mRNA	2291	49.69	60	300.925
SSC1	mRNA	1964	62.635	60	300.925
PDA1	mRNA	1262	52.385	60	300.925
BMH2	mRNA	905	59.29	60	300.925
YPL225W	mRNA	440	52.655	60	300.925
RLP7	mRNA	968	50.17	60	300.925
GCV3	mRNA	512	40.12	59	295.91
PDR5	mRNA	4535	56.87	59	295.91
RIM1	mRNA	408	56.72	59	295.91
NDE1	mRNA	1682	60.85	59	295.91
SCW4	mRNA	1160	68.96	59	295.91
POR1	mRNA	851	60.23	59	295.91
RPA34	mRNA	701	57.96	59	295.91
QCR7	mRNA	383	67.3	59	295.91
VMA8	mRNA	770	55.12	59	295.91
YNL208W	mRNA	599	61.22	58	290.895
HNT1	mRNA	477	54.6	58	290.895
ARX1	mRNA	1781	63.035	58	290.895
ERP1	mRNA	659	56.725	58	290.895
RPS8A	mRNA	610	63	57	285.879
CDC60	mRNA	3272	54.21	57	285.879
AMN1	mRNA	1649	59.87	57	285.879
RPC40	mRNA	1007	51.65	57	285.879
WRS1	mRNA	1298	50.11	57	285.879
ASP1	mRNA	1145	47.85	57	285.879
ATP17	mRNA	305	56.265	56	280.864
ERG4	mRNA	1421	53.78	56	280.864
PST2	mRNA	596	56.44	56	280.864
SBH1	mRNA	248	58.16	56	280.864
LEU1	mRNA	2339	61.675	56	280.864
MLC1	mRNA	449	45.92	56	280.864
ENV9	mRNA	992	52.58	56	280.864
TIM17	mRNA	476	55.5	55	275.848
TPM1	mRNA	599	46.15	55	275.848
SPE3	mRNA	881	47.52	55	275.848
YDR341C	mRNA	1823	53.37	55	275.848
URA5	mRNA	680	57.48	55	275.848
YKT6	mRNA	602	55.075	54	270.833
MAP1	mRNA	1163	55.715	54	270.833
AQR1	mRNA	1760	64.06	54	270.833
RPG1	mRNA	2894	59.91	54	270.833
HSP60	mRNA	1718	57.69	53	265.817
RPB5	mRNA	647	51.35	53	265.817
RPT2	mRNA	1313	47.36	53	265.817
TIF2	mRNA	1187	61.37	53	265.817
CDC42	mRNA	575	56.67	53	265.817
CCT4	mRNA	1586	51.52	53	265.817
IDI1	mRNA	866	54.04	53	265.817
FSH1	mRNA	731	49.35	53	265.817
NHP6B	mRNA	327	59.925	52	260.802
BAP2	mRNA	1829	69.56	52	260.802
KRR1	mRNA	950	50.475	52	260.802
NOP15	mRNA	662	52.375	52	260.802
FPR3	mRNA	1235	49.145	52	260.802
TSC13	mRNA	932	57.625	52	260.802
SSH1	mRNA	1472	60.255	52	260.802
SEC13	mRNA	893	48.105	52	260.802
ADH6	mRNA	1082	57	51	255.787
YSY6	mRNA	197	55.37	51	255.787
NMD3	mRNA	1556	55.74	51	255.787
DYS1	mRNA	1163	53.24	51	255.787
RPC19	mRNA	428	63.85	51	255.787
ATP16	mRNA	482	72.635	50	250.771
PHO86	mRNA	935	45.455	50	250.771
HCR1	mRNA	797	55.195	50	250.771
MFA2	mRNA	116	93.84	50	250.771
PWP1	mRNA	1730	53.65	50	250.771
PAA1	mRNA	575	51.165	50	250.771
VPH1	mRNA	2522	62.685	50	250.771
ZRC1	mRNA	1328	64.19	50	250.771
MDM34	mRNA	1379	64.61	49	245.756
RPL7A	mRNA	736	60.51	49	245.756
CIC1	mRNA	1130	72.92	49	245.756
PFK2	mRNA	2879	63.81	49	245.756
PUP2	mRNA	782	49.92	49	245.756
DUT1	mRNA	443	51.14	49	245.756
OLE1	mRNA	1532	81.33	49	245.756
CBR1	mRNA	854	38.93	49	245.756
HTS1	mRNA	1640	47.08	49	245.756
SFM1	mRNA	641	50.65	49	245.756
URA4	mRNA	1094	41.65	49	245.756
QCR8	mRNA	284	57.68	49	245.756
SCS2	mRNA	734	56.04	49	245.756
NHP6A	mRNA	281	59.36	48	240.74
ACP1	mRNA	377	55.795	48	240.74
YPQ1	mRNA	926	65.045	48	240.74
RPL22B	mRNA	369	68.77	48	240.74
ATP5	mRNA	638	52.235	48	240.74
GCD11	mRNA	1583	61.655	48	240.74
TSC3	mRNA	242	55.85	48	240.74
YMR295C	mRNA	593	76.865	48	240.74
CCT5	mRNA	1688	57.985	48	240.74
PRY2	mRNA	989	61.835	48	240.74
FRS2	mRNA	1511	60.185	48	240.74
VMA1	mRNA	3215	53.16	48	240.74
RVB1	mRNA	1391	56.65	48	240.74
TMA20	mRNA	546	59.5	48	240.74
NOP2	mRNA	1856	56.95	47	235.725
NOG1	mRNA	1943	66.73	47	235.725
MIC10	mRNA	293	51.59	47	235.725
ATP1	mRNA	1637	66.05	47	235.725
PRE4	mRNA	800	53.43	47	235.725
ARB1	mRNA	1832	56.65	47	235.725
PIS1	mRNA	662	62.3	47	235.725
LSM5	mRNA	281	54.26	47	235.725
IZH1	mRNA	950	74.05	47	235.725
VMA5	mRNA	1178	61.7	47	235.725
THR4	mRNA	1544	57.16	46	230.709
MES1	mRNA	2255	54.53	46	230.709
ITR1	mRNA	1754	55.195	46	230.709
PRE9	mRNA	776	55.78	46	230.709
PRE7	mRNA	725	70.605	46	230.709
PRE6	mRNA	764	50.52	46	230.709
LSM7	mRNA	348	53.18	46	230.709
ATP19	mRNA	206	51.67	45	225.694
POL30	mRNA	776	62.59	45	225.694
PGA3	mRNA	938	53.5	45	225.694
CBC2	mRNA	626	49.87	45	225.694
MDH2	mRNA	1133	69.81	45	225.694
SHM2	mRNA	1409	68.48	45	225.694
FUN12	mRNA	3008	50.27	45	225.694
RPT1	mRNA	1403	53.72	45	225.694
RNA1	mRNA	1223	53.16	45	225.694
AAT2	mRNA	1256	63.91	45	225.694
ALA1	mRNA	2876	55.37	45	225.694
CDC48	mRNA	2507	58.08	44	220.679
YLR179C	mRNA	605	48.125	44	220.679
TCP1	mRNA	1679	58.375	44	220.679
YHM2	mRNA	944	64.655	44	220.679
GSF2	mRNA	1211	68.005	44	220.679
ECM15	mRNA	314	58.89	44	220.679
DBP5	mRNA	1448	54.05	44	220.679
CCT7	mRNA	1652	54.955	44	220.679
HRP1	mRNA	1604	67.425	44	220.679
PRO3	mRNA	860	59.92	44	220.679
PPX1	mRNA	1193	53.985	44	220.679
TOM5	mRNA	152	61.56	44	220.679
PUP3	mRNA	617	62.1	44	220.679
RRS1	mRNA	611	52.41	44	220.679
CGR1	mRNA	362	51.23	44	220.679
DUG1	mRNA	1445	54.585	44	220.679
ADE12	mRNA	1301	58.935	44	220.679
HRI1	mRNA	734	46.565	44	220.679
PMI40	mRNA	1290	58.71	44	220.679
ATP7	mRNA	524	53.12	43	215.663
OST1	mRNA	1430	60.55	43	215.663
PMT2	mRNA	2279	60.5	43	215.663
IRC22	mRNA	677	51.59	43	215.663
PRE5	mRNA	704	46.33	43	215.663
NPT1	mRNA	1289	60.08	43	215.663
ILV2	mRNA	2063	68.93	43	215.663
GVP36	mRNA	980	58.71	43	215.663
RLP24	mRNA	599	58.765	42	210.648
RPN5	mRNA	1337	50.85	42	210.648
YNK1	mRNA	461	45.975	42	210.648
HTZ1	mRNA	404	58.705	42	210.648
SNA3	mRNA	401	52.08	42	210.648
PNO1	mRNA	824	61.31	42	210.648
CCT6	mRNA	1640	55.155	42	210.648
RAD23	mRNA	1196	50.555	42	210.648
PRE1	mRNA	596	61.4	42	210.648
ILV1	mRNA	1730	57.8	42	210.648
CCT8	mRNA	1706	58.485	42	210.648
SCL1	mRNA	758	54.415	42	210.648
FAS1	mRNA	6155	62.875	42	210.648
RDI1	mRNA	608	49.2	41	205.632
RRP17	mRNA	707	51.46	41	205.632
VTC4	mRNA	2165	60.27	41	205.632
AIM29	mRNA	467	56.55	41	205.632
ESF1	mRNA	1886	49.08	41	205.632
YPT31	mRNA	671	41.4	41	205.632
CHO2	mRNA	2609	56.58	41	205.632
LPD1	mRNA	1499	51.5	41	205.632
CCT2	mRNA	1583	58.55	41	205.632
ERG1	mRNA	1490	82.83	40	200.617
RET3	mRNA	569	46.59	40	200.617
WBP1	mRNA	1292	61.755	40	200.617
ERG20	mRNA	1058	39.42	40	200.617
SNC2	mRNA	347	59.6	40	200.617
SUR2	mRNA	1049	64.19	40	200.617
SCW11	mRNA	1628	72.265	40	200.617
SUP35	mRNA	2057	48.48	40	200.617
MIR1	mRNA	935	62.185	40	200.617
DIM1	mRNA	956	52.175	40	200.617
ARO8	mRNA	1502	56.55	40	200.617
VAN1	mRNA	1607	60.33	40	200.617
LOC1	mRNA	614	54.73	40	200.617
WWM1	mRNA	635	39.985	40	200.617
NOP16	mRNA	695	47.74	40	200.617
YPR204W	mRNA	3098	63.105	40	200.617
RPN2	mRNA	2837	59.71	39	195.601
RPA49	mRNA	1247	62.71	39	195.601
OST5	mRNA	261	56.86	39	195.601
GLN4	mRNA	2429	54.36	39	195.601
HMF1	mRNA	389	54.04	39	195.601
ERV46	mRNA	1247	48.57	39	195.601
YNL190W	mRNA	614	95.83	39	195.601
PEA2	mRNA	1262	62.89	39	195.601
SDD2	mRNA	437	54.33	39	195.601
MAE1	mRNA	2009	64.37	39	195.601
RPA190	mRNA	4994	69.14	39	195.601
EMC4	mRNA	572	56.23	39	195.601
EBP2	mRNA	1283	37.3	39	195.601
SIM1	mRNA	1433	68.24	39	195.601
YPT7	mRNA	626	60.48	39	195.601
RRP7	mRNA	893	57.62	39	195.601
COX8	mRNA	236	57.25	39	195.601
UTP25	mRNA	2165	56.12	38	190.586
UTP21	mRNA	2819	56.365	38	190.586
HHO1	mRNA	776	58.11	38	190.586
DPH5	mRNA	902	58.345	38	190.586
CSM1	mRNA	572	53.43	38	190.586
MRI1	mRNA	1235	50.74	38	190.586
SUN4	mRNA	1275	80.95	38	190.586
CDC11	mRNA	1247	56.65	38	190.586
VTA1	mRNA	992	53.21	38	190.586
ARO7	mRNA	770	54.995	38	190.586
TYE7	mRNA	875	71.665	38	190.586
MEO1	mRNA	206	45.045	38	190.586
HAS1	mRNA	1517	57	38	190.586
YRF1-5	mRNA	5390	65	38	190.586
BCP1	mRNA	851	54.285	38	190.586
CRH1	mRNA	1523	64.795	38	190.586
MGE1	mRNA	686	65.295	38	190.586
TPA1	mRNA	1934	60.56	38	190.586
THR1	mRNA	1073	58.785	38	190.586
YHR020W	mRNA	2066	41.495	38	190.586
FTR1	mRNA	1214	64.165	38	190.586
CPR3	mRNA	548	51.56	38	190.586
VMA9	mRNA	223	53.07	38	190.586
PRE2	mRNA	863	47.7	38	190.586
KIN3	mRNA	1307	55.025	38	190.586
RKI1	mRNA	776	60.36	38	190.586
NOP6	mRNA	677	55.91	37	185.571
COX13	mRNA	389	53	37	185.571
NOP4	mRNA	2057	52.5	37	185.571
PDR16	mRNA	1055	62.18	37	185.571
ECM1	mRNA	638	63.25	37	185.571
PRC1	mRNA	1598	62.77	37	185.571
HAC1	mRNA	717	62.82	37	185.571
COR1	mRNA	1373	54.13	37	185.571
TMH11	mRNA	317	48.91	37	185.571
PUB1	mRNA	1361	70.4	37	185.571
FAS2	mRNA	5663	60	37	185.571
PFK27	mRNA	1193	72.33	37	185.571
ACS2	mRNA	2051	59.32	37	185.571
RPT4	mRNA	1313	54.91	37	185.571
ILV6	mRNA	929	46.12	37	185.571
CKB1	mRNA	836	60.32	37	185.571
CDC12	mRNA	1223	52.19	37	185.571
GIM4	mRNA	336	56.87	37	185.571
LRP1	mRNA	554	51.23	37	185.571
PRS3	mRNA	962	47.45	37	185.571
ATP15	mRNA	188	54.635	36	180.555
PHO3	mRNA	1403	58.81	36	180.555
TRM112	mRNA	407	47.35	36	180.555
CTF8	mRNA	401	61.935	36	180.555
RNR1	mRNA	2666	62.055	36	180.555
NOP12	mRNA	1379	50.175	36	180.555
ACC1	mRNA	6701	54.605	36	180.555
ERP2	mRNA	647	49.755	36	180.555
ATP3	mRNA	935	58.87	36	180.555
CDC37	mRNA	1520	55.325	36	180.555
RPA12	mRNA	377	61.965	36	180.555
URA6	mRNA	614	56.175	36	180.555
NOC2	mRNA	2132	59.92	36	180.555
SSP120	mRNA	704	47.405	36	180.555
ARL1	mRNA	551	58.4	36	180.555
FKS1	mRNA	5630	65.735	36	180.555
PUP1	mRNA	785	45.81	36	180.555
ADE6	mRNA	4076	61.705	36	180.555
SRP21	mRNA	503	59.325	36	180.555
CRS1	mRNA	2303	53.405	36	180.555
SEM1	mRNA	269	49.72	35	175.54
RPN3	mRNA	1571	56.37	35	175.54
EXP1	mRNA	449	45.62	35	175.54
TMA16	mRNA	536	61.04	35	175.54
NPC2	mRNA	521	67.03	35	175.54
PUF6	mRNA	1970	47.87	35	175.54
RNR2	mRNA	1199	67.42	35	175.54
PXR1	mRNA	815	49.75	35	175.54
LSG1	mRNA	1922	49.65	35	175.54
NIT3	mRNA	875	47.8	35	175.54
TAF14	mRNA	735	50.81	35	175.54
FOL2	mRNA	731	50.57	35	175.54
SEC11	mRNA	503	47.08	35	175.54
YTM1	mRNA	1382	56.96	35	175.54
ISU1	mRNA	497	66.5	35	175.54
GLR1	mRNA	1451	49.65	35	175.54
VMA13	mRNA	1436	49.48	35	175.54
MYO2	mRNA	4724	55.7	35	175.54
PRE8	mRNA	752	54.23	35	175.54
CCS1	mRNA	749	48.61	35	175.54
UTP4	mRNA	2330	44.65	35	175.54
UTP9	mRNA	1727	53.1	35	175.54
CMS1	mRNA	875	63.52	35	175.54
NEW1	mRNA	3590	56.39	35	175.54
DSE1	mRNA	1721	64.99	34	170.524
RPT6	mRNA	1217	51.55	34	170.524
TPM2	mRNA	485	47.615	34	170.524
GLO3	mRNA	1481	57.065	34	170.524
PTH2	mRNA	626	50.68	34	170.524
PHO13	mRNA	938	55.18	34	170.524
RPA135	mRNA	3611	63.345	34	170.524
ABF2	mRNA	551	67.415	34	170.524
VRG4	mRNA	1013	69.61	34	170.524
PRP43	mRNA	2303	51.11	34	170.524
ADE17	mRNA	1778	51.465	34	170.524
RPN10	mRNA	806	46.835	34	170.524
OAC1	mRNA	974	70.705	34	170.524
YOR342C	mRNA	959	64.88	34	170.524
PGA2	mRNA	389	43.105	34	170.524
NAT5	mRNA	530	29.155	34	170.524
YMR226C	mRNA	803	41.9	34	170.524
VMA2	mRNA	1553	59.62	34	170.524
SVS1	mRNA	782	54.215	34	170.524
HRR25	mRNA	1484	54.91	34	170.524
SPB1	mRNA	2525	53.64	33	165.509
BUD20	mRNA	500	50.92	33	165.509
ZPR1	mRNA	1460	50.38	33	165.509
NSA2	mRNA	785	53.52	33	165.509
BUD21	mRNA	644	53.84	33	165.509
UBC1	mRNA	647	58.92	33	165.509
TRM82	mRNA	1334	57.22	33	165.509
RLI1	mRNA	1826	69.48	33	165.509
PMT1	mRNA	2453	50.88	33	165.509
VTC2	mRNA	2486	57.27	33	165.509
KRE2	mRNA	1328	56.04	33	165.509
RPN12	mRNA	824	50.87	33	165.509
PRO2	mRNA	1370	40.18	33	165.509
UTP15	mRNA	1541	62.28	33	165.509
RPC31	mRNA	755	57.92	33	165.509
RRP1	mRNA	836	48.62	33	165.509
TRM11	mRNA	1301	56.62	33	165.509
RCF2	mRNA	674	59.8	33	165.509
YMR099C	mRNA	893	58.36	33	165.509
RUB1	mRNA	234	48	33	165.509
IMP4	mRNA	872	50.76	33	165.509
RPA43	mRNA	980	54.27	33	165.509
KSH1	mRNA	218	65.79	33	165.509
RVB2	mRNA	1415	55.33	33	165.509
GIM3	mRNA	389	54.42	33	165.509
YAR1	mRNA	602	44.655	32	160.494
NIP1	mRNA	2438	66.37	32	160.494
ATG27	mRNA	815	57.575	32	160.494
SDT1	mRNA	842	71.49	32	160.494
TOM22	mRNA	458	63.75	32	160.494
RPS9A	mRNA	594	55.945	32	160.494
ADE1	mRNA	920	47.335	32	160.494
HEM3	mRNA	983	17.555	32	160.494
RER1	mRNA	566	54.455	32	160.494
MIS1	mRNA	2927	53.62	32	160.494
GET1	mRNA	707	56.35	32	160.494
EMG1	mRNA	758	48.47	32	160.494
EMC1	mRNA	2282	56.16	32	160.494
COX5A	mRNA	461	70.35	32	160.494
SEC61	mRNA	1442	56.46	32	160.494
YBL036C	mRNA	773	57.22	32	160.494
PKR1	mRNA	368	57.305	32	160.494
GPX2	mRNA	488	65.185	32	160.494
HIP1	mRNA	1811	65.02	32	160.494
RRP15	mRNA	752	53.58	32	160.494
SEC28	mRNA	890	57	32	160.494
MPP10	mRNA	1781	57.455	32	160.494
URM1	mRNA	299	60.185	32	160.494
YCP4	mRNA	743	54.91	32	160.494
PSE1	mRNA	3269	55.08	32	160.494
YVH1	mRNA	1094	58.78	31	155.478
QCR6	mRNA	443	57.5	31	155.478
OST2	mRNA	392	50.07	31	155.478
SSA1	mRNA	1928	50.73	31	155.478
ARC35	mRNA	1028	43.38	31	155.478
EGT2	mRNA	3125	65.86	31	155.478
MEU1	mRNA	1013	56.33	31	155.478
CLC1	mRNA	701	49	31	155.478
LSM3	mRNA	269	41.09	31	155.478
NCB2	mRNA	441	54.58	31	155.478
DIP2	mRNA	2831	59.55	31	155.478
VPS1	mRNA	2114	57.3	31	155.478
SEC62	mRNA	824	53.33	31	155.478
SEC63	mRNA	1991	52.12	31	155.478
CNB1	mRNA	528	54.65	31	155.478
SEC14	mRNA	915	71.78	31	155.478
RRP12	mRNA	3686	53.32	31	155.478
TIF4631	mRNA	2858	57.92	31	155.478
SIS1	mRNA	1058	61.33	31	155.478
REI1	mRNA	1181	55.68	31	155.478
NAP1	mRNA	1253	45.97	31	155.478
LSM12	mRNA	563	52.26	31	155.478
SER1	mRNA	1187	49.77	31	155.478
RDL1	mRNA	419	56.25	31	155.478
SAM2	mRNA	1154	62.32	31	155.478
ETT1	mRNA	1238	55.91	31	155.478
KTR1	mRNA	1181	65.4	31	155.478
FIG2	mRNA	4829	54.32	31	155.478
DBP9	mRNA	1784	55	31	155.478
UTP23	mRNA	764	46.39	31	155.478
RRP45	mRNA	917	57.92	31	155.478
UGP1	mRNA	1499	64.86	31	155.478
YOR283W	mRNA	692	55.98	30	150.463
KAP123	mRNA	3341	63.22	30	150.463
ARC40	mRNA	1154	50.185	30	150.463
LYS12	mRNA	1115	48.75	30	150.463
RRP5	mRNA	5189	58.075	30	150.463
RBD2	mRNA	788	58.525	30	150.463
CHO1	mRNA	830	59.665	30	150.463
MCM1	mRNA	860	76.41	30	150.463
NCP1	mRNA	2075	60.01	30	150.463
BUR6	mRNA	428	55.36	30	150.463
ADD66	mRNA	803	53.31	30	150.463
RPF1	mRNA	887	60.56	30	150.463
NNT1	mRNA	785	46.425	30	150.463
RPT3	mRNA	1286	56.195	30	150.463
VPS74	mRNA	1037	51.18	30	150.463
DPM1	mRNA	803	62.865	30	150.463
PRS5	mRNA	1490	64.72	30	150.463
PRE3	mRNA	648	53.435	30	150.463
APA1	mRNA	965	53.46	30	150.463
RFA3	mRNA	368	61.095	30	150.463
ERG13	mRNA	1475	52.91	30	150.463
ARD1	mRNA	716	57.595	30	150.463
ARP2	mRNA	1176	56.605	30	150.463
NYV1	mRNA	762	62.25	29	145.447
DPH2	mRNA	1604	64.87	29	145.447
FAU1	mRNA	635	56.84	29	145.447
PHB1	mRNA	863	65.62	29	145.447
AVT1	mRNA	1808	45.79	29	145.447
GDA1	mRNA	1556	56.87	29	145.447
ELP2	mRNA	2366	55.36	29	145.447
RFA2	mRNA	822	50.73	29	145.447
STP4	mRNA	1472	72.87	29	145.447
SKP1	mRNA	584	45.64	29	145.447
CAR1	mRNA	1001	52.04	29	145.447
MNN9	mRNA	1187	52.59	29	145.447
TNA1	mRNA	1604	69.26	29	145.447
SAS10	mRNA	1832	48.92	29	145.447
SDH3	mRNA	596	52.96	29	145.447
SOD2	mRNA	701	55.84	29	145.447
RRP4	mRNA	1079	55.65	29	145.447
PRE10	mRNA	866	45.48	29	145.447
MDH3	mRNA	1031	46.87	29	145.447
YCK1	mRNA	1616	61.96	29	145.447
TIM11	mRNA	290	45.8	29	145.447
CPA1	mRNA	1235	70.83	29	145.447
STT3	mRNA	2156	57.71	29	145.447
LSP1	mRNA	1025	49.8	29	145.447
SMI1	mRNA	1517	58.96	29	145.447
KTR3	mRNA	1214	45	29	145.447
COQ5	mRNA	923	50.91	29	145.447
NOP13	mRNA	1211	51.08	29	145.447
COX4	mRNA	480	69.76	29	145.447
LAT1	mRNA	1448	43.8	29	145.447
TMA22	mRNA	596	45.04	29	145.447
TUB1	mRNA	1344	43.31	29	145.447
ACL4	mRNA	1163	53.425	28	140.432
FCF2	mRNA	653	60.415	28	140.432
RPN6	mRNA	1304	50.23	28	140.432
ISW1	mRNA	3389	50.87	28	140.432
SNQ2	mRNA	4505	68.4	28	140.432
BFR2	mRNA	1604	58.1	28	140.432
PEP4	mRNA	1217	63.375	28	140.432
PHB2	mRNA	932	55.54	28	140.432
PHS1	mRNA	653	63.05	28	140.432
STI1	mRNA	1769	53.69	28	140.432
AHC2	mRNA	386	60.77	28	140.432
LCB2	mRNA	1685	64.935	28	140.432
RPN13	mRNA	470	41.23	28	140.432
VPS24	mRNA	674	60.76	28	140.432
RAI1	mRNA	1163	62.24	28	140.432
EMP70	mRNA	2003	63.59	28	140.432
RPA14	mRNA	413	69.615	28	140.432
RRP9	mRNA	1721	58.17	28	140.432
HIS3	mRNA	662	50.95	28	140.432
GIM5	mRNA	492	54.67	28	140.432
MNN10	mRNA	1181	61.78	28	140.432
QCR9	mRNA	201	62.66	28	140.432
LSM1	mRNA	518	53.825	28	140.432
IST2	mRNA	2840	62.555	28	140.432
COX9	mRNA	179	65.615	28	140.432
RRP42	mRNA	797	57.215	28	140.432
LOG1	mRNA	737	48.045	28	140.432
AUR1	mRNA	1205	74.995	28	140.432
UTP6	mRNA	1322	58.22	28	140.432
SNF4	mRNA	968	54.66	28	140.432
ATP14	mRNA	374	66.81	27	135.416
UTP14	mRNA	2699	56.5	27	135.416
GCD6	mRNA	2138	63.26	27	135.416
ERG24	mRNA	1316	60.17	27	135.416
ALB1	mRNA	527	53.77	27	135.416
RHO3	mRNA	695	56.91	27	135.416
RSC8	mRNA	1673	60.07	27	135.416
RPB7	mRNA	515	56.83	27	135.416
HGH1	mRNA	1184	57.07	27	135.416
SYG1	mRNA	2708	63.58	27	135.416
MAK21	mRNA	3077	58.14	27	135.416
RTT10	mRNA	3041	64.83	27	135.416
BNA7	mRNA	785	48.32	27	135.416
RSA3	mRNA	662	56.81	27	135.416
MIC19	mRNA	512	50.62	27	135.416
MAK16	mRNA	920	47.82	27	135.416
GRX1	mRNA	332	49.54	27	135.416
HNM1	mRNA	1691	57.66	27	135.416
EMC5	mRNA	425	54.59	27	135.416
GCN3	mRNA	917	58.27	27	135.416
BMS1	mRNA	3551	59.57	27	135.416
AGE1	mRNA	1448	74.13	27	135.416
MTR4	mRNA	3221	51.78	27	135.416
GPI11	mRNA	659	56.15	27	135.416
EFM5	mRNA	748	56.84	27	135.416
RPC11	mRNA	332	61.92	27	135.416
TOM6	mRNA	185	57.8	27	135.416
HEK2	mRNA	1145	53.42	27	135.416
SRM1	mRNA	1448	47.88	27	135.416
ISU2	mRNA	470	53.35	27	135.416
GCS1	mRNA	1058	48.08	27	135.416
RPB11	mRNA	362	43.43	27	135.416
SRP54	mRNA	1625	60.31	27	135.416
ERG5	mRNA	1616	74.9	26	130.401
YET3	mRNA	611	59.865	26	130.401
NUP57	mRNA	1625	61.04	26	130.401
MRPS12	mRNA	461	65.665	26	130.401
RPB2	mRNA	3674	60.95	26	130.401
BAP3	mRNA	1814	59.63	26	130.401
ALO1	mRNA	1580	51.71	26	130.401
COP1	mRNA	3605	54.695	26	130.401
TRM1	mRNA	1712	56.615	26	130.401
COX12	mRNA	251	57.07	26	130.401
CTR2	mRNA	569	62.375	26	130.401
KRE9	mRNA	830	68.565	26	130.401
CRP1	mRNA	1397	59.76	26	130.401
MAK11	mRNA	1406	54.575	26	130.401
GRX3	mRNA	752	52.895	26	130.401
ADE16	mRNA	1775	47.33	26	130.401
GPI16	mRNA	1832	57.145	26	130.401
MTC1	mRNA	1436	49.42	26	130.401
SSF1	mRNA	1361	51.52	26	130.401
RIX7	mRNA	2513	46.455	26	130.401
MLC2	mRNA	491	52.005	26	130.401
ALD5	mRNA	1562	55.03	26	130.401
MRP2	mRNA	347	54.21	26	130.401
SPP2	mRNA	557	57.925	26	130.401
SOP4	mRNA	704	63.29	26	130.401
SLG1	mRNA	1136	63.395	26	130.401
RRN3	mRNA	1883	69.495	26	130.401
RRP3	mRNA	1505	52.47	26	130.401
CYB5	mRNA	362	61.11	26	130.401
KEI1	mRNA	666	52.56	26	130.401
VMA6	mRNA	1037	48.08	26	130.401
PRS4	mRNA	980	60.845	26	130.401
LSO2	mRNA	278	59.91	25	125.386
TUF1	mRNA	1313	49.75	25	125.386
VPS21	mRNA	632	57.28	25	125.386
NOP53	mRNA	1367	42.66	25	125.386
PAM18	mRNA	506	50.15	25	125.386
IPI3	mRNA	1667	58.85	25	125.386
ERB1	mRNA	2423	58.07	25	125.386
PSG1	mRNA	1178	61.17	25	125.386
RPB3	mRNA	956	46.76	25	125.386
CKA1	mRNA	1118	53.69	25	125.386
ERD2	mRNA	660	46.41	25	125.386
UBC6	mRNA	752	55.57	25	125.386
ADE4	mRNA	1532	55.04	25	125.386
PEX34	mRNA	434	51.96	25	125.386
GNP1	mRNA	1991	62.43	25	125.386
SYH1	mRNA	2549	60.96	25	125.386
CBS1	mRNA	689	70.35	25	125.386
NAN1	mRNA	2690	50.1	25	125.386
NSG1	mRNA	875	70.46	25	125.386
FPR2	mRNA	407	60.68	25	125.386
SRP68	mRNA	1799	61.46	25	125.386
UBC13	mRNA	462	55.57	25	125.386
FAF1	mRNA	1040	50.52	25	125.386
TIM23	mRNA	668	60.92	25	125.386
SRP72	mRNA	1922	58.83	25	125.386
IFA38	mRNA	1043	45.17	25	125.386
NRP1	mRNA	2159	57.37	25	125.386
URA2	mRNA	6710	75.15	25	125.386
YRF1-7	mRNA	5580	65.65	25	125.386
YIP3	mRNA	531	52.61	25	125.386
FET3	mRNA	1910	59.91	25	125.386
POB3	mRNA	1658	53.26	25	125.386
DCW1	mRNA	1349	50.12	25	125.386
MRPS18	mRNA	653	58.48	25	125.386
ARC19	mRNA	515	62.3	25	125.386
YSA1	mRNA	695	53.5	25	125.386
MAP2	mRNA	1265	46.7	25	125.386
GPD2	mRNA	1322	66.73	25	125.386
LCP5	mRNA	1073	47.61	25	125.386
RPS6B	mRNA	711	74.96	25	125.386
UTP30	mRNA	824	50.64	25	125.386
LTP1	mRNA	485	49.015	24	120.37
DBP10	mRNA	2987	48.835	24	120.37
CLG1	mRNA	1358	54.225	24	120.37
GLO2	mRNA	824	49.145	24	120.37
GPA1	mRNA	1418	55.21	24	120.37
MEX67	mRNA	1799	54.265	24	120.37
RAM2	mRNA	950	40.69	24	120.37
SOF1	mRNA	1469	57.81	24	120.37
SCP160	mRNA	3668	57.81	24	120.37
WTM1	mRNA	1313	60.94	24	120.37
MFA1	mRNA	110	73.92	24	120.37
SPT5	mRNA	3191	57.72	24	120.37
RPB4	mRNA	665	53.88	24	120.37
MNN2	mRNA	1793	62.795	24	120.37
TCB3	mRNA	4637	64.71	24	120.37
YGR054W	mRNA	1928	63.435	24	120.37
CNS1	mRNA	1157	49.315	24	120.37
CUZ1	mRNA	824	55.48	24	120.37
HRB1	mRNA	1365	49.815	24	120.37
RAD27	mRNA	1148	42.995	24	120.37
RCL1	mRNA	1103	54.57	24	120.37
TIM8	mRNA	263	64.46	24	120.37
GRX5	mRNA	452	53.035	24	120.37
MAK5	mRNA	2321	59.165	24	120.37
MAK3	mRNA	530	50	24	120.37
STE4	mRNA	1271	56.69	24	120.37
YRB2	mRNA	983	55.255	24	120.37
NPA3	mRNA	1157	42.19	24	120.37
APS2	mRNA	443	50.155	24	120.37
GAS3	mRNA	1574	62.62	24	120.37
KRI1	mRNA	1775	44.98	24	120.37
SER2	mRNA	929	59.27	24	120.37
KES1	mRNA	1304	60.97	24	120.37
PPT1	mRNA	1541	53.315	24	120.37
PDX3	mRNA	686	50.52	24	120.37
ARC15	mRNA	464	52.32	24	120.37
SPL2	mRNA	446	57.4	24	120.37
KAP104	mRNA	2756	63.96	24	120.37
SWP1	mRNA	860	57.585	24	120.37
IPT1	mRNA	1583	66.25	24	120.37
PPH21	mRNA	1109	57.9	24	120.37
IKI3	mRNA	4049	54.92	23	115.355
STE24	mRNA	1361	46.33	23	115.355
PRO1	mRNA	1286	59.29	23	115.355
ISD11	mRNA	284	57.52	23	115.355
AAP1	mRNA	2570	65.61	23	115.355
DET1	mRNA	1004	74.35	23	115.355
SRP1	mRNA	1628	50.2	23	115.355
BRE5	mRNA	1547	59.31	23	115.355
RNQ1	mRNA	1217	58.19	23	115.355
SSO2	mRNA	887	69.87	23	115.355
ELP3	mRNA	1673	54.38	23	115.355
MCA1	mRNA	1298	50.36	23	115.355
CCP1	mRNA	1085	66.64	23	115.355
ADE8	mRNA	644	48.5	23	115.355
YLR257W	mRNA	965	50.8	23	115.355
UBP1	mRNA	2429	56.56	23	115.355
UBP3	mRNA	2738	53.55	23	115.355
FCF1	mRNA	569	61.61	23	115.355
LIP5	mRNA	1244	63.24	23	115.355
SEC65	mRNA	821	55.6	23	115.355
RAS1	mRNA	929	49.36	23	115.355
EMC2	mRNA	878	58.54	23	115.355
YHB1	mRNA	1199	53.67	23	115.355
RIB5	mRNA	716	46.5	23	115.355
SEC66	mRNA	620	63	23	115.355
NOP9	mRNA	2000	50.62	23	115.355
SSO1	mRNA	872	50.74	23	115.355
CUE1	mRNA	611	49.36	23	115.355
VPS68	mRNA	554	49.39	23	115.355
TOM7	mRNA	182	58.72	23	115.355
LEU9	mRNA	1814	75.72	23	115.355
SPN1	mRNA	1232	47.28	23	115.355
DRE2	mRNA	1046	56.11	23	115.355
UPS2	mRNA	692	52.44	23	115.355
FRE1	mRNA	2060	50.44	23	115.355
RAD6	mRNA	518	44.7	23	115.355
UBP10	mRNA	2378	64.17	23	115.355
LSB1	mRNA	725	60.3	23	115.355
CKA2	mRNA	1019	65.36	23	115.355
IMP3	mRNA	551	57.79	23	115.355
SGD1	mRNA	2699	59.48	23	115.355
BIM1	mRNA	1034	33.96	23	115.355
SEC23	mRNA	2306	67.76	23	115.355
GCD1	mRNA	1736	60.62	23	115.355
RPT5	mRNA	1304	51.37	23	115.355
RMT2	mRNA	1238	51.43	23	115.355
DOT6	mRNA	2012	60.4	23	115.355
DIC1	mRNA	896	44.04	23	115.355
TYW1	mRNA	2432	50.8	23	115.355
COX6	mRNA	446	55.61	23	115.355
CYC1	mRNA	329	62.83	23	115.355
PTC3	mRNA	1406	41.55	23	115.355
UTP5	mRNA	1931	46.58	23	115.355
GDS1	mRNA	1568	56.43	23	115.355
TOM70	mRNA	1853	55.14	23	115.355
SPO24	mRNA	203	65.825	22	110.339
HAM1	mRNA	593	54.175	22	110.339
UTP11	mRNA	752	59.12	22	110.339
UTP10	mRNA	5309	61.12	22	110.339
DYN2	mRNA	280	44.125	22	110.339
OST6	mRNA	998	66.89	22	110.339
DPH1	mRNA	1277	43.935	22	110.339
MIA40	mRNA	1211	58.165	22	110.339
ZRT2	mRNA	1268	58.965	22	110.339
GCD2	mRNA	1955	72.895	22	110.339
CAN1	mRNA	1772	59.755	22	110.339
TPO3	mRNA	1868	68.52	22	110.339
HYR1	mRNA	491	60	22	110.339
SPF1	mRNA	3647	62.055	22	110.339
YCK2	mRNA	1640	61.825	22	110.339
ANP1	mRNA	1502	44.125	22	110.339
HAP1	mRNA	4508	53.8	22	110.339
BFR1	mRNA	1412	58.935	22	110.339
AIM45	mRNA	1034	61.92	22	110.339
SCD6	mRNA	1049	67.12	22	110.339
TSR4	mRNA	1226	60.13	22	110.339
GOT1	mRNA	417	68.09	22	110.339
SFA1	mRNA	1160	60.075	22	110.339
CHZ1	mRNA	461	44.085	22	110.339
GRX8	mRNA	329	53.935	22	110.339
IRC7	mRNA	1022	60.58	22	110.339
MVD1	mRNA	1190	60.53	22	110.339
SEC72	mRNA	581	57.47	22	110.339
RVS167	mRNA	1448	52.44	22	110.339
PAN6	mRNA	929	55.345	22	110.339
PAN5	mRNA	1139	46.25	22	110.339
GAS5	mRNA	1454	65.905	22	110.339
SDA1	mRNA	2303	47.16	22	110.339
RPC17	mRNA	485	61.8	22	110.339
CUE3	mRNA	1874	44.565	22	110.339
YIP5	mRNA	932	56.865	22	110.339
SPT15	mRNA	722	63.72	22	110.339
TRP5	mRNA	2123	47.65	22	110.339
YOS1	mRNA	259	49.52	22	110.339
TSR1	mRNA	2366	50.46	22	110.339
MDE1	mRNA	734	73.645	22	110.339
PPN2	mRNA	980	51.715	22	110.339
SEC24	mRNA	2780	67.995	22	110.339
LAC1	mRNA	1256	63.075	22	110.339
YPD1	mRNA	503	62.28	22	110.339
MUP1	mRNA	1724	64.785	22	110.339
ERV41	mRNA	1059	55.215	22	110.339
ALG5	mRNA	1004	56.19	22	110.339
ELF1	mRNA	437	51.45	22	110.339
FES1	mRNA	872	55.745	22	110.339
CLU1	mRNA	3833	59.65	21	105.324
PAM16	mRNA	449	42.97	21	105.324
RPC53	mRNA	1268	49.62	21	105.324
URK1	mRNA	1505	57.96	21	105.324
RPN1	mRNA	2981	59.27	21	105.324
YIH1	mRNA	776	52.96	21	105.324
TOA2	mRNA	368	71.63	21	105.324
FUM1	mRNA	1466	51.14	21	105.324
DEF1	mRNA	2216	57.54	21	105.324
DUS3	mRNA	2006	61.09	21	105.324
NUP116	mRNA	3341	55.83	21	105.324
SMY2	mRNA	2222	62.72	21	105.324
NUP49	mRNA	1418	53.03	21	105.324
EFT2	mRNA	2528	74.65	21	105.324
VID24	mRNA	1088	66.83	21	105.324
SEH1	mRNA	1049	61.21	21	105.324
NMT1	mRNA	1367	53.75	21	105.324
AFG1	mRNA	1529	56.1	21	105.324
UBP6	mRNA	1499	64.8	21	105.324
MDM35	mRNA	260	66.61	21	105.324
BDF2	mRNA	1916	65.05	21	105.324
IZH2	mRNA	953	63.08	21	105.324
RVS161	mRNA	797	57.7	21	105.324
PRY1	mRNA	899	58.47	21	105.324
FPS1	mRNA	2009	55.11	21	105.324
GET4	mRNA	938	58.16	21	105.324
RSR1	mRNA	818	63.75	21	105.324
DRS1	mRNA	2258	56.72	21	105.324
GCD14	mRNA	1151	60.69	21	105.324
POP1	mRNA	2627	62.88	21	105.324
RPN11	mRNA	920	65.9	21	105.324
MRS6	mRNA	1811	63.08	21	105.324
RRP46	mRNA	671	57.17	21	105.324
GCN1	mRNA	8018	56.85	21	105.324
PUN1	mRNA	791	50.52	21	105.324
HMRA1	mRNA	382	67.78	21	105.324
HIS4	mRNA	2399	54.19	21	105.324
URE2	mRNA	1064	52.08	21	105.324
HOG1	mRNA	1307	52.62	21	105.324
CRM1	mRNA	3254	68	21	105.324
TOM20	mRNA	551	70.79	21	105.324
NAF1	mRNA	1478	60.38	21	105.324
SHE3	mRNA	1277	54.76	21	105.324
SCJ1	mRNA	1133	51.46	21	105.324
DAP1	mRNA	458	65.32	21	105.324
LYS4	mRNA	2081	53.69	21	105.324
SEC21	mRNA	2807	63.24	21	105.324
FAP7	mRNA	593	48.93	21	105.324
ENA1	mRNA	3275	65.88	21	105.324
HEM12	mRNA	1088	62.73	21	105.324
MDL1	mRNA	2087	57.46	21	105.324
TED1	mRNA	1421	49.22	21	105.324
MRPL50	mRNA	419	53.425	20	100.308
UTP20	mRNA	7481	53.645	20	100.308
IPI1	mRNA	1004	58.825	20	100.308
LYP1	mRNA	1835	64.52	20	100.308
TUB3	mRNA	1338	84.425	20	100.308
BUD16	mRNA	938	55.3	20	100.308
UTR4	mRNA	683	73.36	20	100.308
MXR1	mRNA	554	52.955	20	100.308
YMC2	mRNA	989	52.16	20	100.308
PYC2	mRNA	3542	49.335	20	100.308
SUR7	mRNA	908	70.065	20	100.308
SAC6	mRNA	1929	55.315	20	100.308
BCD1	mRNA	1100	45.165	20	100.308
RTT102	mRNA	473	44.805	20	100.308
SHS1	mRNA	1655	52.915	20	100.308
PMT4	mRNA	2288	61.335	20	100.308
STP3	mRNA	1031	63.355	20	100.308
TVP18	mRNA	503	52.8	20	100.308
SPT4	mRNA	308	61.22	20	100.308
TRM8	mRNA	860	50.635	20	100.308
CAJ1	mRNA	1175	59.925	20	100.308
SCS7	mRNA	1154	62.365	20	100.308
JIP5	mRNA	1478	49.825	20	100.308
YMR027W	mRNA	1412	57	20	100.308
EMC6	mRNA	326	73.395	20	100.308
LTV1	mRNA	1391	47	20	100.308
DLS1	mRNA	503	50.845	20	100.308
PUS7	mRNA	2030	59.955	20	100.308
MIG2	mRNA	1148	62.4	20	100.308
MRD1	mRNA	2663	51.77	20	100.308
OXA1	mRNA	1208	52.925	20	100.308
RRP8	mRNA	1178	62.985	20	100.308
LSC1	mRNA	989	56.83	20	100.308
TSR3	mRNA	941	54.33	20	100.308
POL5	mRNA	3068	54.76	20	100.308
DBP7	mRNA	2228	54.07	20	100.308
MNN11	mRNA	1268	46.85	20	100.308
IMP1	mRNA	572	60.08	20	100.308
TAT2	mRNA	1778	60.7	20	100.308
HSL1	mRNA	4556	49.53	20	100.308
LSM6	mRNA	260	54.085	20	100.308
LSM2	mRNA	288	69.355	20	100.308
DSK2	mRNA	1121	50.985	20	100.308
ATP20	mRNA	347	56.665	20	100.308
TAH1	mRNA	335	47.955	20	100.308
NUP120	mRNA	3113	55.85	20	100.308
UTP8	mRNA	2141	48.59	20	100.308
PAM17	mRNA	593	56.55	19	95.293
YIF1	mRNA	944	71.8	19	95.293
ABP140	mRNA	1887	50.08	19	95.293
PDX1	mRNA	1232	50.93	19	95.293
TMC1	mRNA	452	66.09	19	95.293
DTD1	mRNA	453	44.57	19	95.293
NOB1	mRNA	1379	53.31	19	95.293
TPN1	mRNA	1739	58.37	19	95.293
EFG1	mRNA	701	55.12	19	95.293
NAB2	mRNA	1577	67.15	19	95.293
ERG27	mRNA	1043	49.04	19	95.293
HCA4	mRNA	2312	59.82	19	95.293
ACO1	mRNA	2336	67.19	19	95.293
TPO5	mRNA	1856	67.46	19	95.293
RHO2	mRNA	578	52.83	19	95.293
PST1	mRNA	1334	54.76	19	95.293
AIP1	mRNA	1847	55.25	19	95.293
CWC25	mRNA	539	45.73	19	95.293
RRP14	mRNA	1304	53.45	19	95.293
HEM2	mRNA	1028	50.52	19	95.293
PLN1	mRNA	851	57.68	19	95.293
CDC10	mRNA	968	60.36	19	95.293
OST3	mRNA	1052	71.67	19	95.293
ROX3	mRNA	662	54.92	19	95.293
UBX2	mRNA	1754	64	19	95.293
YNR061C	mRNA	659	49.43	19	95.293
SMX3	mRNA	260	60.87	19	95.293
DGK1	mRNA	872	59.48	19	95.293
CWP1	mRNA	719	69.96	19	95.293
LRO1	mRNA	1985	45.33	19	95.293
SWM1	mRNA	512	55.96	19	95.293
BET1	mRNA	429	41.3	19	95.293
RNA14	mRNA	2033	58.08	19	95.293
SFT1	mRNA	294	47.58	19	95.293
MIG1	mRNA	1514	72.19	19	95.293
YPR1	mRNA	938	42.29	19	95.293
REX4	mRNA	869	56.8	19	95.293
YIP4	mRNA	707	50.29	19	95.293
HRT1	mRNA	365	59.52	19	95.293
RIX1	mRNA	2291	53.65	19	95.293
TSR2	mRNA	617	63.68	19	95.293
MGR2	mRNA	341	53.5	19	95.293
DOM34	mRNA	1160	43.41	19	95.293
MCK1	mRNA	1127	84.75	19	95.293
NIF3	mRNA	866	45.3	19	95.293
PML39	mRNA	1004	49.92	19	95.293
CRN1	mRNA	1955	47.88	19	95.293
GCN20	mRNA	2258	54	19	95.293
IES6	mRNA	500	56.64	19	95.293
VTS1	mRNA	1571	64.87	19	95.293
DIF1	mRNA	401	57.16	19	95.293
PTC2	mRNA	1394	56.04	19	95.293
SYO1	mRNA	1862	57.96	19	95.293
CKB2	mRNA	776	50.43	19	95.293
SHE10	mRNA	1733	38.655	18	90.2776
GFA1	mRNA	2153	52.64	18	90.2776
MTR2	mRNA	568	61.275	18	90.2776
YBR085C-A	mRNA	257	61.155	18	90.2776
RIE1	mRNA	2345	71.765	18	90.2776
CUP9	mRNA	920	67.06	18	90.2776
KTR6	mRNA	1340	64.61	18	90.2776
NSG2	mRNA	899	59.75	18	90.2776
UMP1	mRNA	446	55.11	18	90.2776
CSL4	mRNA	878	39.51	18	90.2776
KRE33	mRNA	3170	54.84	18	90.2776
RGS2	mRNA	929	62.185	18	90.2776
SPO12	mRNA	521	54.135	18	90.2776
HO	mRNA	1760	52.8	18	90.2776
LAP2	mRNA	2015	59.505	18	90.2776
PHO12	mRNA	1403	70.88	18	90.2776
UBC7	mRNA	497	47.96	18	90.2776
MRP10	mRNA	287	64.42	18	90.2776
NCL1	mRNA	2054	59.245	18	90.2776
RTG2	mRNA	1766	48.12	18	90.2776
RPB9	mRNA	368	53.1	18	90.2776
TCB2	mRNA	3536	61.07	18	90.2776
CDC14	mRNA	1655	51.985	18	90.2776
NOG2	mRNA	1461	72.31	18	90.2776
PWP2	mRNA	2771	58.115	18	90.2776
REA1	mRNA	14732	63.19	18	90.2776
CTR1	mRNA	1220	60.825	18	90.2776
SMB1	mRNA	590	51.235	18	90.2776
TSC11	mRNA	4292	50.66	18	90.2776
SMM1	mRNA	1154	52.125	18	90.2776
KEL3	mRNA	1955	62.23	18	90.2776
PAL1	mRNA	1499	63.08	18	90.2776
BET5	mRNA	479	59.925	18	90.2776
POM34	mRNA	899	58.96	18	90.2776
RPD3	mRNA	1301	57.325	18	90.2776
OPT1	mRNA	2399	66.94	18	90.2776
IFH1	mRNA	3257	66.875	18	90.2776
RPC25	mRNA	638	56.885	18	90.2776
SER33	mRNA	1409	53.705	18	90.2776
TIM13	mRNA	317	62.475	18	90.2776
PKH2	mRNA	3245	58.07	18	90.2776
SDO1	mRNA	752	53.62	18	90.2776
LCB1	mRNA	1676	55.045	18	90.2776
FRQ1	mRNA	572	64.78	18	90.2776
ARP3	mRNA	1349	59.045	18	90.2776
YLR363W-A	mRNA	257	48.955	18	90.2776
LOS1	mRNA	3302	59.73	18	90.2776
TAF10	mRNA	620	48.24	18	90.2776
NAT1	mRNA	2564	72.95	18	90.2776
GLO1	mRNA	980	51.925	18	90.2776
YAP1	mRNA	1952	60.895	18	90.2776
ADE3	mRNA	2840	47.02	18	90.2776
ERV29	mRNA	932	51.42	18	90.2776
LSM4	mRNA	563	53.18	18	90.2776
IES3	mRNA	752	59.435	18	90.2776
CDS1	mRNA	1373	62.495	18	90.2776
RRP43	mRNA	1184	57.155	18	90.2776
YLF2	mRNA	1217	61.36	18	90.2776
CPR8	mRNA	926	65.59	18	90.2776
NMA111	mRNA	2993	54.21	18	90.2776
DIG1	mRNA	1358	58.41	17	85.2622
VHR2	mRNA	1517	71.3	17	85.2622
RPN9	mRNA	1181	63.12	17	85.2622
KRE28	mRNA	1157	60.52	17	85.2622
PDE2	mRNA	1580	70.52	17	85.2622
SKI6	mRNA	740	59.12	17	85.2622
MGM101	mRNA	809	40.84	17	85.2622
LYS21	mRNA	1322	52.67	17	85.2622
DIB1	mRNA	431	45.96	17	85.2622
MIM2	mRNA	263	40.67	17	85.2622
CDC21	mRNA	914	64.24	17	85.2622
PCM1	mRNA	1673	46.65	17	85.2622
ACO2	mRNA	2369	64.67	17	85.2622
SEY1	mRNA	2330	63.36	17	85.2622
CDC31	mRNA	485	53.32	17	85.2622
TPO2	mRNA	1844	91.83	17	85.2622
RTF1	mRNA	1676	64.56	17	85.2622
COS6	mRNA	1145	68.08	17	85.2622
BAR1	mRNA	1763	64.65	17	85.2622
ERP4	mRNA	623	76.26	17	85.2622
MTD1	mRNA	962	62.37	17	85.2622
PSY2	mRNA	2576	44.15	17	85.2622
TRM2	mRNA	1919	55.95	17	85.2622
RSM7	mRNA	743	57	17	85.2622
YPT52	mRNA	704	51.18	17	85.2622
UBA1	mRNA	3074	62.41	17	85.2622
PLB3	mRNA	2060	73.17	17	85.2622
GLC8	mRNA	689	58.96	17	85.2622
RPC82	mRNA	1964	61.2	17	85.2622
RSA4	mRNA	1547	70.88	17	85.2622
PGM1	mRNA	1712	63.92	17	85.2622
KRE6	mRNA	2162	74.78	17	85.2622
RBL2	mRNA	320	56.07	17	85.2622
EMP47	mRNA	1337	59.85	17	85.2622
EPL1	mRNA	2498	66.93	17	85.2622
TIM21	mRNA	719	51.83	17	85.2622
ARO9	mRNA	1541	56.57	17	85.2622
NAB6	mRNA	3404	51.24	17	85.2622
YGK1	mRNA	647	52.74	17	85.2622
RPS22B	mRNA	401	64	17	85.2622
REE1	mRNA	596	59.83	17	85.2622
PPH3	mRNA	926	66.68	17	85.2622
UIP5	mRNA	1331	63.28	17	85.2622
ERO1	mRNA	1691	53.83	17	85.2622
SLX9	mRNA	632	52.05	17	85.2622
PUS1	mRNA	1634	62.71	17	85.2622
MIM1	mRNA	341	51.47	17	85.2622
HIS5	mRNA	1157	86.54	17	85.2622
MET22	mRNA	1073	49.96	17	85.2622
RIO1	mRNA	1454	52.21	17	85.2622
NMA1	mRNA	1205	60.04	17	85.2622
GPI17	mRNA	1604	64.2	17	85.2622
NOC3	mRNA	1991	75.57	17	85.2622
NOC4	mRNA	1658	56.08	17	85.2622
TRP2	mRNA	1523	59.42	17	85.2622
OTU2	mRNA	923	50.78	17	85.2622
GAL80	mRNA	1307	54.78	17	85.2622
CNL1	mRNA	368	53.58	17	85.2622
FET4	mRNA	1658	68	17	85.2622
SFH5	mRNA	884	55.56	17	85.2622
MKC7	mRNA	1790	61.39	17	85.2622
CST26	mRNA	1193	65.32	17	85.2622
CDC3	mRNA	1562	46.88	17	85.2622
TOM1	mRNA	9806	59.18	17	85.2622
SEC31	mRNA	3821	58.9	17	85.2622
ARA1	mRNA	1034	59.08	17	85.2622
FRD1	mRNA	1412	65.42	17	85.2622
ENP1	mRNA	1451	52.96	17	85.2622
RRP6	mRNA	2201	57.71	17	85.2622
EHT1	mRNA	1355	57.04	17	85.2622
MTQ1	mRNA	944	67.82	17	85.2622
ARC18	mRNA	536	53.09	17	85.2622
SEC22	mRNA	644	54.08	17	85.2622
SEC26	mRNA	2921	50.5	17	85.2622
SLT2	mRNA	1454	54.89	17	85.2622
YML018C	mRNA	1181	62.08	17	85.2622
HIS6	mRNA	785	46.44	17	85.2622
SRP102	mRNA	734	51.3	17	85.2622
RRP40	mRNA	722	61.54	17	85.2622
NET1	mRNA	3569	58.14	17	85.2622
XRN1	mRNA	4586	55.91	17	85.2622
TAF6	mRNA	1550	58.77	17	85.2622
BUD32	mRNA	785	45.67	17	85.2622
SNF7	mRNA	722	54.31	17	85.2622
YBL055C	mRNA	1256	58.42	17	85.2622
MRPL9	mRNA	809	54	17	85.2622
SKY1	mRNA	2228	68	17	85.2622
SFK1	mRNA	1061	63.355	16	80.2468
TSC10	mRNA	962	54.54	16	80.2468
GNT1	mRNA	1475	42.18	16	80.2468
SPO74	mRNA	1241	47.89	16	80.2468
RPN4	mRNA	1595	65.465	16	80.2468
POP2	mRNA	1301	53.435	16	80.2468
SLC1	mRNA	911	48.25	16	80.2468
TMA46	mRNA	1037	42.365	16	80.2468
GGC1	mRNA	902	76	16	80.2468
RSM27	mRNA	332	47.655	16	80.2468
IDH2	mRNA	1109	43.495	16	80.2468
MIC27	mRNA	704	59.63	16	80.2468
AMD1	mRNA	2432	60.765	16	80.2468
SRB6	mRNA	365	47.295	16	80.2468
RSC30	mRNA	2651	60.015	16	80.2468
PAR32	mRNA	887	65.3	16	80.2468
APQ12	mRNA	416	62.365	16	80.2468
PRM5	mRNA	956	62.07	16	80.2468
SAC1	mRNA	1871	48.605	16	80.2468
CCA1	mRNA	1640	55.12	16	80.2468
YJU3	mRNA	941	49.7	16	80.2468
INP51	mRNA	2840	53.96	16	80.2468
RSC6	mRNA	1451	57.72	16	80.2468
COX7	mRNA	182	72.625	16	80.2468
SFG1	mRNA	1040	72.57	16	80.2468
SAP30	mRNA	605	56.845	16	80.2468
WHI2	mRNA	1460	50.825	16	80.2468
BET2	mRNA	977	56.995	16	80.2468
GGA2	mRNA	1757	57.875	16	80.2468
TRM5	mRNA	1499	56.26	16	80.2468
GNA1	mRNA	479	46.705	16	80.2468
NUP145	mRNA	3953	57.075	16	80.2468
SGV1	mRNA	1973	45.385	16	80.2468
SHO1	mRNA	1103	49.69	16	80.2468
TOD6	mRNA	1577	69.965	16	80.2468
CPT1	mRNA	1182	54.345	16	80.2468
PGS1	mRNA	1565	65.025	16	80.2468
ATC1	mRNA	884	63.835	16	80.2468
APL5	mRNA	2798	58.545	16	80.2468
YNL108C	mRNA	812	61.915	16	80.2468
ESF2	mRNA	950	58.32	16	80.2468
KRE1	mRNA	941	61.575	16	80.2468
GRX2	mRNA	431	67.64	16	80.2468
RET2	mRNA	1640	45.46	16	80.2468
ARO3	mRNA	1112	66.285	16	80.2468
TFB5	mRNA	218	65.81	16	80.2468
CDC36	mRNA	575	58.805	16	80.2468
EFM1	mRNA	1757	57.46	16	80.2468
KGD2	mRNA	1391	57.915	16	80.2468
VPS25	mRNA	608	63.935	16	80.2468
DAT1	mRNA	746	65.515	16	80.2468
SXM1	mRNA	2834	52.78	16	80.2468
LDB7	mRNA	542	55.655	16	80.2468
GPI1	mRNA	1829	62.88	16	80.2468
MNT2	mRNA	1676	48.915	16	80.2468
SRV2	mRNA	1580	62.6	16	80.2468
PNP1	mRNA	935	47.975	16	80.2468
RPC37	mRNA	848	43.8	16	80.2468
FRA1	mRNA	2249	55	16	80.2468
DFG5	mRNA	1376	51.29	16	80.2468
CSG2	mRNA	1232	77.55	16	80.2468
HIS7	mRNA	1658	45.81	16	80.2468
MNP1	mRNA	584	62.835	16	80.2468
HSP12	mRNA	329	27.76	16	80.2468
MID2	mRNA	1130	78.435	16	80.2468
YIP1	mRNA	746	54.95	16	80.2468
DCP2	mRNA	2912	63.105	16	80.2468
ALE1	mRNA	1859	70.81	16	80.2468
ESS1	mRNA	512	56.995	16	80.2468
MDY2	mRNA	638	56	16	80.2468
HUT1	mRNA	1019	58.51	16	80.2468
LEU4	mRNA	1859	70.455	16	80.2468
CSE1	mRNA	2882	51.455	16	80.2468
DBF4	mRNA	2114	59.33	16	80.2468
OPY2	mRNA	1082	56.87	16	80.2468
TAF9	mRNA	473	42.44	16	80.2468
ENP2	mRNA	2123	56.74	16	80.2468
CKS1	mRNA	452	50.37	16	80.2468
ELP6	mRNA	821	63.61	16	80.2468
NOP14	mRNA	2432	58.335	16	80.2468
SRL2	mRNA	1178	67.235	16	80.2468
FUS3	mRNA	1061	55.54	16	80.2468
CYC8	mRNA	2900	59.76	16	80.2468
TCD2	mRNA	1343	56.995	16	80.2468
MOT3	mRNA	1472	56.825	16	80.2468
TOM40	mRNA	1163	60.385	16	80.2468
UTP7	mRNA	1664	56.23	16	80.2468
GRS2	mRNA	1856	49.45	16	80.2468
MRP51	mRNA	1034	69.615	16	80.2468
IOC4	mRNA	1427	57.43	15	75.2313
KTI12	mRNA	941	41.62	15	75.2313
ERG8	mRNA	1355	49.59	15	75.2313
SMD3	mRNA	305	51.9	15	75.2313
MDH1	mRNA	1004	52.38	15	75.2313
MRPL33	mRNA	260	59.16	15	75.2313
MRPL37	mRNA	317	42.54	15	75.2313
RFC1	mRNA	2585	55.2	15	75.2313
RFC2	mRNA	1061	53.85	15	75.2313
ORM2	mRNA	650	73.61	15	75.2313
PTM1	mRNA	1571	49.38	15	75.2313
IDH1	mRNA	1082	60.76	15	75.2313
ENT3	mRNA	1226	49.88	15	75.2313
PPN1	mRNA	2024	56.48	15	75.2313
LYS20	mRNA	1286	48.96	15	75.2313
CIA1	mRNA	992	53.41	15	75.2313
CAP2	mRNA	863	58.52	15	75.2313
RSC3	mRNA	2657	61.15	15	75.2313
RCM1	mRNA	1472	60.57	15	75.2313
AHA1	mRNA	1052	41.86	15	75.2313
ISA1	mRNA	752	68.8	15	75.2313
SOL3	mRNA	749	54.88	15	75.2313
TIM44	mRNA	1295	42	15	75.2313
RNH203	mRNA	332	54.33	15	75.2313
RSM18	mRNA	416	62.17	15	75.2313
VPS55	mRNA	422	72.87	15	75.2313
TRP3	mRNA	1454	50.96	15	75.2313
MNN5	mRNA	1760	49.12	15	75.2313
SPP41	mRNA	4307	58.75	15	75.2313
SAM35	mRNA	989	43.09	15	75.2313
RPN7	mRNA	1289	44.42	15	75.2313
SPE2	mRNA	1190	68.14	15	75.2313
TRM7	mRNA	932	51.59	15	75.2313
SHM1	mRNA	1472	53.12	15	75.2313
PDP3	mRNA	914	52.42	15	75.2313
ZWF1	mRNA	1517	56.31	15	75.2313
VPS45	mRNA	1733	48.19	15	75.2313
COM2	mRNA	1331	63.92	15	75.2313
SNL1	mRNA	479	40.72	15	75.2313
BNA6	mRNA	887	49.22	15	75.2313
DAD1	mRNA	284	57.04	15	75.2313
GIR2	mRNA	797	54.55	15	75.2313
MRPL44	mRNA	297	55.68	15	75.2313
RDH54	mRNA	2876	68.78	15	75.2313
NDD1	mRNA	1664	79.29	15	75.2313
FAA1	mRNA	2102	53.87	15	75.2313
THO1	mRNA	656	61.35	15	75.2313
RET1	mRNA	3449	67.1	15	75.2313
POP5	mRNA	521	57.61	15	75.2313
POP8	mRNA	402	54.83	15	75.2313
CFD1	mRNA	881	52.96	15	75.2313
APN1	mRNA	1103	50.04	15	75.2313
RTC5	mRNA	1703	62.3	15	75.2313
TAF4	mRNA	1166	53.24	15	75.2313
CUE4	mRNA	353	55.37	15	75.2313
VMA22	mRNA	545	63.75	15	75.2313
BUD17	mRNA	953	64.05	15	75.2313
SOK1	mRNA	2705	62.08	15	75.2313
DCP1	mRNA	695	101.58	15	75.2313
GRE2	mRNA	1028	74.88	15	75.2313
SCT1	mRNA	2279	63.12	15	75.2313
PCT1	mRNA	1274	53.5	15	75.2313
NUP2	mRNA	2162	58.3	15	75.2313
TUM1	mRNA	914	49.07	15	75.2313
IGO1	mRNA	506	54.64	15	75.2313
ATO3	mRNA	827	73	15	75.2313
EFM4	mRNA	773	53.88	15	75.2313
ARP6	mRNA	1316	46.64	15	75.2313
CSI2	mRNA	1025	55.32	15	75.2313
DBP8	mRNA	1295	62.08	15	75.2313
HSP82	mRNA	2129	72.64	15	75.2313
ALG2	mRNA	1511	66.92	15	75.2313
ALG7	mRNA	1346	59.07	15	75.2313
EFR3	mRNA	2348	66.7	15	75.2313
DAP2	mRNA	2456	46.73	15	75.2313
IES4	mRNA	350	47.57	15	75.2313
MET12	mRNA	1973	59.4	15	75.2313
ALT1	mRNA	1778	59.77	15	75.2313
RAT1	mRNA	3020	57.1	15	75.2313
PET309	mRNA	2897	65.67	15	75.2313
SRP101	mRNA	1865	55.27	15	75.2313
MPP6	mRNA	560	58.65	15	75.2313
CEG1	mRNA	1379	64.42	15	75.2313
SPC2	mRNA	536	56.46	15	75.2313
AGP1	mRNA	1901	55.44	15	75.2313
KEX2	mRNA	2444	54.62	15	75.2313
SNT1	mRNA	3680	74.16	15	75.2313
RPO31	mRNA	4382	72.08	15	75.2313
END3	mRNA	1049	57.545	14	70.2159
GTR1	mRNA	932	61.565	14	70.2159
KTI11	mRNA	248	60.49	14	70.2159
APD1	mRNA	950	47.955	14	70.2159
YET1	mRNA	620	61.41	14	70.2159
BUD22	mRNA	1559	56.27	14	70.2159
ALR1	mRNA	2579	56.845	14	70.2159
NUP188	mRNA	4967	55.615	14	70.2159
MRPL31	mRNA	395	74.615	14	70.2159
MED2	mRNA	1295	54.24	14	70.2159
UIP3	mRNA	707	56.3	14	70.2159
UTP18	mRNA	1784	66.765	14	70.2159
SKG1	mRNA	1067	57.005	14	70.2159
MTR10	mRNA	2918	65.585	14	70.2159
MTC4	mRNA	2084	43.86	14	70.2159
MRPL27	mRNA	440	61.86	14	70.2159
YLH47	mRNA	1364	65.12	14	70.2159
GID8	mRNA	1367	60.26	14	70.2159
HUB1	mRNA	221	52.365	14	70.2159
HMG1	mRNA	3164	70.295	14	70.2159
MRPL16	mRNA	698	63.385	14	70.2159
SLA1	mRNA	3734	58.45	14	70.2159
PHA2	mRNA	1004	46.23	14	70.2159
RPO21	mRNA	5201	56.795	14	70.2159
PUF4	mRNA	2666	74.7	14	70.2159
UBC9	mRNA	474	55.405	14	70.2159
RBG2	mRNA	1106	44.84	14	70.2159
TYR1	mRNA	1358	54.635	14	70.2159
CWC21	mRNA	407	53.345	14	70.2159
PCL5	mRNA	689	62.07	14	70.2159
RIF1	mRNA	5750	79.55	14	70.2159
COS1	mRNA	1145	43.065	14	70.2159
PMU1	mRNA	887	58.83	14	70.2159
TVP15	mRNA	431	55.605	14	70.2159
YAH1	mRNA	518	73.95	14	70.2159
SPE4	mRNA	902	58.025	14	70.2159
RKM1	mRNA	1751	49.925	14	70.2159
HLJ1	mRNA	674	56.38	14	70.2159
ODC2	mRNA	923	50.995	14	70.2159
NPP1	mRNA	2228	59.765	14	70.2159
TRS31	mRNA	851	69.355	14	70.2159
BCY1	mRNA	1250	57.78	14	70.2159
YOR131C	mRNA	656	56.395	14	70.2159
YPQ2	mRNA	953	73.85	14	70.2159
RAD33	mRNA	533	58.37	14	70.2159
DAD4	mRNA	218	62.365	14	70.2159
SEN34	mRNA	827	60.085	14	70.2159
IXR1	mRNA	1793	77.42	14	70.2159
UNG1	mRNA	1079	43.585	14	70.2159
CLB1	mRNA	1415	60.9	14	70.2159
STE6	mRNA	3872	73.495	14	70.2159
YGR283C	mRNA	1025	54.095	14	70.2159
RTT106	mRNA	1367	39.59	14	70.2159
DDR48	mRNA	1292	53.65	14	70.2159
PBP4	mRNA	557	60.065	14	70.2159
STE7	mRNA	1547	58.3	14	70.2159
LAG1	mRNA	1235	55.04	14	70.2159
YKL069W	mRNA	542	47.005	14	70.2159
URB1	mRNA	5294	56.825	14	70.2159
ATM1	mRNA	2072	48.76	14	70.2159
AIM9	mRNA	1883	60.585	14	70.2159
LOA1	mRNA	902	53.445	14	70.2159
RPL4A	mRNA	1088	61.79	14	70.2159
PRS2	mRNA	956	73.045	14	70.2159
QDR2	mRNA	1628	71.85	14	70.2159
RPC34	mRNA	953	57.405	14	70.2159
CLN3	mRNA	1742	66.47	14	70.2159
GIC2	mRNA	1151	80.105	14	70.2159
EAR1	mRNA	1652	65.8	14	70.2159
RIO2	mRNA	1277	55.095	14	70.2159
YOR1	mRNA	4433	58.355	14	70.2159
GTF1	mRNA	551	56.48	14	70.2159
TRM13	mRNA	1430	67.395	14	70.2159
MDM38	mRNA	1721	53.795	14	70.2159
TAF12	mRNA	1619	65.925	14	70.2159
PLP2	mRNA	860	46.195	14	70.2159
NUP1	mRNA	3230	60.23	14	70.2159
TRP4	mRNA	1142	51.19	14	70.2159
IGO2	mRNA	395	63.855	14	70.2159
RME1	mRNA	902	50.195	14	70.2159
ARP4	mRNA	1469	54.91	14	70.2159
MRP1	mRNA	965	60.265	14	70.2159
MLP1	mRNA	5627	44.135	14	70.2159
ERC1	mRNA	1745	57.06	14	70.2159
PHO91	mRNA	2684	44.305	14	70.2159
RKM4	mRNA	1484	66.115	14	70.2159
CAF16	mRNA	869	51.405	14	70.2159
SIC1	mRNA	854	61.995	14	70.2159
QCR2	mRNA	1106	47.25	14	70.2159
INM1	mRNA	887	65.605	14	70.2159
MRPS16	mRNA	365	53.7	14	70.2159
PHO81	mRNA	3536	48.915	14	70.2159
YJR056C	mRNA	710	61.79	14	70.2159
NUC1	mRNA	989	64.01	14	70.2159
IMG2	mRNA	440	61.285	14	70.2159
MRPL17	mRNA	845	66.78	14	70.2159
PGC1	mRNA	965	58.355	14	70.2159
ERJ5	mRNA	887	50.915	14	70.2159
EAF3	mRNA	1205	59.54	14	70.2159
AHK1	mRNA	2954	58.075	14	70.2159
RNH70	mRNA	1661	63.9	14	70.2159
CWH43	mRNA	2861	69.52	14	70.2159
ORM1	mRNA	668	52.4	13	65.2005
ERG7	mRNA	2195	64.73	13	65.2005
EDC3	mRNA	1655	51	13	65.2005
BUD27	mRNA	2390	56.12	13	65.2005
DID2	mRNA	614	59.04	13	65.2005
STE18	mRNA	332	60.62	13	65.2005
PLB2	mRNA	2120	65.09	13	65.2005
MRPL36	mRNA	533	59.12	13	65.2005
SUB1	mRNA	878	60.46	13	65.2005
HSK3	mRNA	209	59.96	13	65.2005
ISW2	mRNA	3362	63.64	13	65.2005
WSC2	mRNA	1511	63.27	13	65.2005
TOS4	mRNA	1469	42.92	13	65.2005
UTP13	mRNA	2453	63.77	13	65.2005
CUS2	mRNA	857	52.48	13	65.2005
OST4	mRNA	110	73	13	65.2005
PAF1	mRNA	1337	53.46	13	65.2005
PLC1	mRNA	2609	63.48	13	65.2005
HIF1	mRNA	1157	55.9	13	65.2005
ELO1	mRNA	932	54.57	13	65.2005
CPR2	mRNA	617	48.8	13	65.2005
KCH1	mRNA	1493	63.35	13	65.2005
PNC1	mRNA	650	54.19	13	65.2005
ERG26	mRNA	1049	39.21	13	65.2005
INH1	mRNA	257	61.17	13	65.2005
CHD1	mRNA	4406	64.96	13	65.2005
MRPL13	mRNA	794	65.92	13	65.2005
NSA1	mRNA	1391	57.64	13	65.2005
YPT6	mRNA	647	52.5	13	65.2005
PEX25	mRNA	1184	48.19	13	65.2005
MRPL19	mRNA	476	51.73	13	65.2005
PCL1	mRNA	839	69.18	13	65.2005
PEP1	mRNA	4739	56.27	13	65.2005
TFG2	mRNA	1202	53.04	13	65.2005
RIP1	mRNA	647	72.45	13	65.2005
NUP170	mRNA	4508	59.83	13	65.2005
PBI2	mRNA	227	51.12	13	65.2005
ECM14	mRNA	1292	56.96	13	65.2005
TRM3	mRNA	4310	56.5	13	65.2005
BDF1	mRNA	2060	59.79	13	65.2005
RQC1	mRNA	2171	61.22	13	65.2005
DMA1	mRNA	1250	58.37	13	65.2005
RRP36	mRNA	902	44.37	13	65.2005
BNA1	mRNA	533	46.43	13	65.2005
SAT4	mRNA	1811	57.15	13	65.2005
RCK2	mRNA	1832	55.23	13	65.2005
NSP1	mRNA	2472	60.16	13	65.2005
HEM13	mRNA	986	81.96	13	65.2005
TMH18	mRNA	486	53.69	13	65.2005
TFA1	mRNA	1448	52.83	13	65.2005
GET2	mRNA	857	63.71	13	65.2005
TPD3	mRNA	1907	49.96	13	65.2005
MCR1	mRNA	965	69.14	13	65.2005
YGR266W	mRNA	2105	44.15	13	65.2005
TAH11	mRNA	1814	62	13	65.2005
ADF1	mRNA	341	64.36	13	65.2005
TIM22	mRNA	623	52.42	13	65.2005
SLY1	mRNA	2000	50.21	13	65.2005
YPK1	mRNA	2042	42.4	13	65.2005
ALK1	mRNA	2282	49.63	13	65.2005
YHR127W	mRNA	731	45.32	13	65.2005
MRPL40	mRNA	893	53.96	13	65.2005
CAF4	mRNA	1931	55.37	13	65.2005
PBA1	mRNA	831	58.29	13	65.2005
ANY1	mRNA	1217	49.72	13	65.2005
AIM7	mRNA	449	61.75	13	65.2005
GRH1	mRNA	1118	45.48	13	65.2005
POM33	mRNA	839	77.52	13	65.2005
ABF1	mRNA	2195	63.39	13	65.2005
PSF2	mRNA	641	53.24	13	65.2005
HIS2	mRNA	1007	58.37	13	65.2005
SFB3	mRNA	2789	58.91	13	65.2005
ATP12	mRNA	977	58.48	13	65.2005
GUP1	mRNA	1682	71.92	13	65.2005
APS1	mRNA	470	58.83	13	65.2005
ABZ1	mRNA	2363	46.81	13	65.2005
BET3	mRNA	581	70.19	13	65.2005
RFS1	mRNA	632	65	13	65.2005
RTS1	mRNA	2273	60.04	13	65.2005
ARP7	mRNA	1433	57.24	13	65.2005
YDR514C	mRNA	1451	76.14	13	65.2005
EXG2	mRNA	1688	61.19	13	65.2005
GDI1	mRNA	1355	63.37	13	65.2005
CBK1	mRNA	2270	55.62	13	65.2005
MRPL51	mRNA	422	53.78	13	65.2005
SIT1	mRNA	1886	55.82	13	65.2005
SIT4	mRNA	935	69.59	13	65.2005
REH1	mRNA	1298	57.29	13	65.2005
NAT2	mRNA	866	66.2	13	65.2005
KTR7	mRNA	1553	47.87	13	65.2005
GLE2	mRNA	1097	56.09	13	65.2005
GLE1	mRNA	1616	78.67	13	65.2005
CHS7	mRNA	950	58.25	13	65.2005
DPL1	mRNA	1769	56.08	13	65.2005
HST1	mRNA	1511	57.5	13	65.2005
IST1	mRNA	897	62.86	13	65.2005
MET18	mRNA	3098	64.87	13	65.2005
DNL4	mRNA	2834	55.33	13	65.2005
ICE2	mRNA	1475	60.12	13	65.2005
ERV2	mRNA	590	67.73	13	65.2005
RSM10	mRNA	611	69.86	13	65.2005
GMH1	mRNA	821	56.23	13	65.2005
SAK1	mRNA	3428	60.65	13	65.2005
COY1	mRNA	2039	61.92	13	65.2005
RBK1	mRNA	1001	60.17	13	65.2005
YDL012C	mRNA	324	57.08	13	65.2005
TMA23	mRNA	635	63.78	13	65.2005
SNF6	mRNA	998	42.82	13	65.2005
CPR7	mRNA	1181	52.805	12	60.1851
NUP133	mRNA	3473	62.85	12	60.1851
EST3	mRNA	546	59.02	12	60.1851
BUD23	mRNA	827	62.465	12	60.1851
DLD2	mRNA	1592	55.125	12	60.1851
STE14	mRNA	719	64.855	12	60.1851
PHM6	mRNA	314	84.155	12	60.1851
SKT5	mRNA	2090	44.655	12	60.1851
LCB3	mRNA	1229	54.455	12	60.1851
AIM20	mRNA	614	47.305	12	60.1851
EOS1	mRNA	1100	51.55	12	60.1851
AIR1	mRNA	1082	60.615	12	60.1851
TVP23	mRNA	599	65.35	12	60.1851
ERG12	mRNA	1331	59.54	12	60.1851
PSD1	mRNA	1502	53.77	12	60.1851
LYS5	mRNA	818	57.315	12	60.1851
DSE4	mRNA	3353	64.595	12	60.1851
ENT1	mRNA	1364	48.51	12	60.1851
PHO5	mRNA	1403	60.3	12	60.1851
CRD1	mRNA	851	73.005	12	60.1851
MRX14	mRNA	317	52.205	12	60.1851
MRPL8	mRNA	716	58.99	12	60.1851
ZRT1	mRNA	1130	70.315	12	60.1851
KSP1	mRNA	3089	69.285	12	60.1851
HPF1	mRNA	2903	83.39	12	60.1851
TOM71	mRNA	1919	43.565	12	60.1851
FAB1	mRNA	6836	45.45	12	60.1851
ERG28	mRNA	446	67.3	12	60.1851
MRPS9	mRNA	836	49.145	12	60.1851
SSA4	mRNA	1928	56.94	12	60.1851
BRE4	mRNA	3377	62	12	60.1851
BRE1	mRNA	2102	62.985	12	60.1851
SRB7	mRNA	422	54.25	12	60.1851
MRPL10	mRNA	968	65.815	12	60.1851
MRPL11	mRNA	749	62.86	12	60.1851
YFH1	mRNA	524	52.725	12	60.1851
PRM4	mRNA	854	67.355	12	60.1851
SAC3	mRNA	3905	51.545	12	60.1851
RAS2	mRNA	968	41.53	12	60.1851
OCA1	mRNA	716	59.765	12	60.1851
[truncated: 2,973 more rows]

## Sheet: PolyA_1
Feature name	Feature type	Feature length	Feature median tail length	number of reads	RPM
tL_28UAA_29D	tRNA	83	41.48	35	34.6999
tP_28UGG_29O1	tRNA	72	42.38	21	20.8199
tV_28AAC_29O	tRNA	73	51.835	18	17.8457
tG_28GCC_29D2	tRNA	70	44.01	14	13.88
tK_28UUU_29P	tRNA	73	38.44	11	10.9057
tRNA-Phe	tRNA	804	54.105	10	9.91425
tK_28CUU_29C	tRNA	72	46.61	9	8.92283
tD_28GUC_29N	tRNA	70	48.05	9	8.92283
tL_28UAG_29L1	tRNA	82	40.365	8	7.9314
tD_28GUC_29O	tRNA	71	40.36	8	7.9314
tN_28GUU_29P	tRNA	73	61.36	7	6.93998
tK_28UUU_29D	tRNA	73	48.785	6	5.94855
tV_28AAC_29G3	tRNA	73	38.55	6	5.94855
tL_28CAA_29L	tRNA	82	65.97	6	5.94855
tR_28UCU_29G2	tRNA	71	44.23	6	5.94855
tT_28AGU_29I1	tRNA	72	47.08	5	4.95713
tK_28UUU_29L	tRNA	73	42.64	5	4.95713
SUF7	tRNA	72	72.54	5	4.95713
SOE1	tRNA	71	55.07	5	4.95713
tT_28AGU_29C	tRNA	72	56.45	5	4.95713
tK_28CUU_29M	tRNA	72	75.34	4	3.9657
tT_28AGU_29N2	tRNA	72	57.56	3	2.97428
tT_28AGU_29N1	tRNA	72	58.3	3	2.97428
tQ_28UUG_29H	tRNA	71	39.12	3	2.97428
tL_28GAG_29G	tRNA	81	87.67	3	2.97428
tP_28UGG_29O3	tRNA	72	27.54	3	2.97428
tC_28GCA_29P2	tRNA	71	59.08	3	2.97428
tA_28UGC_29O	tRNA	72	49.78	3	2.97428
TGA1	tRNA	72	47.38	3	2.97428
tH_28GUG_29E2	tRNA	71	61.91	3	2.97428
tR_28ACG_29D	tRNA	72	46.81	3	2.97428
tG_28GCC_29E	tRNA	70	77.44	3	2.97428
tI_28AAU_29P2	tRNA	73	59.77	3	2.97428
tN_28GUU_29G	tRNA	73	54.28	2	1.98285
tR_28UCU_29M1	tRNA	71	46.09	2	1.98285
tD_28GUC_29G2	tRNA	71	36.625	2	1.98285
SUP2	tRNA	75	70.33	2	1.98285
tK_28CUU_29P	tRNA	72	48.675	2	1.98285
tE_28UUC_29E2	tRNA	71	80.6	2	1.98285
tE_28UUC_29E1	tRNA	71	44.885	2	1.98285
tP_28UGG_29L	tRNA	72	25.345	2	1.98285
tK_28CUU_29E2	tRNA	72	55.08	2	1.98285
tE_28UUC_29K	tRNA	71	47.7	2	1.98285
tL_28CAA_29N	tRNA	82	31.325	2	1.98285
tV_28AAC_29G2	tRNA	73	37.5	2	1.98285
tV_28AAC_29K2	tRNA	73	42.855	2	1.98285
tE_28UUC_29P	tRNA	71	55.56	2	1.98285
tN_28GUU_29K	tRNA	73	55.05	2	1.98285
tT_28AGU_29D	tRNA	72	76.065	2	1.98285
tP_28UGG_29N2	tRNA	72	24.97	2	1.98285
tR_28UCU_29G1	tRNA	71	60.06	2	1.98285
tH_28GUG_29H	tRNA	71	25.36	2	1.98285
tV_28AAC_29L	tRNA	73	120.835	2	1.98285
TRR4	tRNA	71	40.555	2	1.98285
tT_28AGU_29O2	tRNA	72	63.035	2	1.98285
tI_28AAU_29G	tRNA	73	62.875	2	1.98285
tS_28AGA_29L	tRNA	81	39.145	2	1.98285
SUF5	tRNA	71	41.27	2	1.98285
tK_28CUU_29D2	tRNA	72	40.225	2	1.98285
SUP5	tRNA	75	63.44	1	0.991425
SUP7	tRNA	75	34.88	1	0.991425
tI_28AAU_29P1	tRNA	73	46.17	1	0.991425
tL_28UAG_29L2	tRNA	82	30.13	1	0.991425
SUP17	tRNA	81	49.09	1	0.991425
tV_28UAC_29D	tRNA	73	73.33	1	0.991425
tG_28GCC_29P2	tRNA	70	30.96	1	0.991425
SUP51	tRNA	83	47.87	1	0.991425
IMT4	tRNA	71	91.12	1	0.991425
tW_28CCA_29P	tRNA	72	32.83	1	0.991425
tM_28CAU_29C	tRNA	71	37.22	1	0.991425
tG_28GCC_29P1	tRNA	70	47.64	1	0.991425
CDC65	tRNA	71	53	1	0.991425
tA_28AGC_29M1	tRNA	72	83.75	1	0.991425
tT_28UGU_29P	tRNA	71	14.56	1	0.991425
tT_28AGU_29H	tRNA	72	103.04	1	0.991425
tV_28AAC_29G1	tRNA	73	46.36	1	0.991425
tW_28CCA_29G1	tRNA	72	27.62	1	0.991425
tA_28AGC_29P	tRNA	72	39.86	1	0.991425
tR_28UCU_29K	tRNA	71	60.92	1	0.991425
EMT4	tRNA	72	117.45	1	0.991425
tN_28GUU_29N1	tRNA	73	56.13	1	0.991425
tE_28UUC_29J	tRNA	71	31.83	1	0.991425
tE_28UUC_29L	tRNA	71	91	1	0.991425
tE_28UUC_29C	tRNA	71	20.83	1	0.991425
tN_28GUU_29C	tRNA	73	65.2	1	0.991425
tK_28UUU_29O	tRNA	73	30	1	0.991425
tA_28AGC_29M2	tRNA	72	59.5	1	0.991425
tR_28ACG_29L	tRNA	72	74.41	1	0.991425
tQ_28UUG_29D3	tRNA	71	51.62	1	0.991425
tQ_28UUG_29L	tRNA	71	26.93	1	0.991425
tG_28GCC_29G1	tRNA	70	54.69	1	0.991425
tE_28UUC_29M	tRNA	71	52.88	1	0.991425
tI_28AAU_29N2	tRNA	73	59.76	1	0.991425
SUP19	tRNA	81	72.82	1	0.991425
tG_28GCC_29M	tRNA	70	59.26	1	0.991425
tI_28AAU_29I2	tRNA	73	92.17	1	0.991425
tS_28AGA_29J	tRNA	81	38.33	1	0.991425
tD_28GUC_29B	tRNA	71	249.82	1	0.991425
tI_28UAU_29D	tRNA	73	52.27	1	0.991425
tR_28ACG_29O	tRNA	72	24.87	1	0.991425
tS_28AGA_29H	tRNA	81	40.2	1	0.991425
tS_28AGA_29A	tRNA	81	47.27	1	0.991425
tS_28AGA_29D3	tRNA	82	71.67	1	0.991425
tV_28AAC_29M2	tRNA	73	64.78	1	0.991425
tR_28UCU_29M2	tRNA	71	31.06	1	0.991425
HSX1	tRNA	71	133.81	1	0.991425
tI_28UAU_29L	tRNA	73	31.72	1	0.991425
tR_28UCU_29G3	tRNA	71	66.19	1	0.991425
gag-pol_20fusion_20protein	transposable_element	217730	41.84	7155	7093.65
gag_20protein	transposable_element	53095	42.29	876	868.488
YOR343C-B	transposable_element	5313	41.345	482	477.867
TY2B_B	transposable_element	5313	34.93	5	4.95713
YDR210W-C	transposable_element	1322	31.84	3	2.97428
YARCTyB1-1	transposable_element	3590	60.425	2	1.98285
YARCTyA1-1	transposable_element	1322	23.27	1	0.991425
TLC1	telomerase_RNA	1300	72.895	66	65.4341
LSR1	snRNA	1174	47.855	14	13.88
SNR14	snRNA	159	40.37	5	4.95713
SNR19	snRNA	567	60.855	4	3.9657
SNR7-S	snRNA	178	40.07	3	2.97428
SNR24	snoRNA	88	34.5	2746	2722.45
SNR18	snoRNA	101	39.09	2580	2557.88
SNR39	snoRNA	88	35.775	1818	1802.41
SNR59	snoRNA	77	35.315	1186	1175.83
SNR38	snoRNA	94	36.84	991	982.502
SNR44	snoRNA	210	35.67	817	809.994
SNR43	snoRNA	208	42.3	149	147.722
SNR191	snoRNA	273	57.35	88	87.2454
SNR33	snoRNA	182	55.13	61	60.4769
SNR84	snoRNA	549	44.195	58	57.5027
SNR86	snoRNA	1003	79.59	53	52.5455
SNR49	snoRNA	164	66.31	52	51.5541
SNR31	snoRNA	224	48.11	41	40.6484
SNR9	snoRNA	186	49.91	39	38.6656
SNR42	snoRNA	350	54.86	38	37.6742
SNR4	snoRNA	185	47.325	36	35.6913
SNR63	snoRNA	254	48.27	34	33.7085
SNR41	snoRNA	94	50.27	32	31.7256
SNR17B	snoRNA	332	41.52	25	24.7856
SNR57	snoRNA	87	51.63	21	20.8199
SNR83	snoRNA	305	58.37	20	19.8285
SNR68	snoRNA	135	63.19	19	18.8371
SNR30	snoRNA	605	72.75	16	15.8628
SNR36	snoRNA	181	36.99	16	15.8628
SNR75	snoRNA	88	41.08	15	14.8714
SNR87	snoRNA	108	33.35	15	14.8714
SNR66	snoRNA	85	30.46	11	10.9057
SNR69	snoRNA	100	56.52	11	10.9057
SNR60	snoRNA	103	34.88	11	10.9057
SNR10	snoRNA	244	69.41	10	9.91425
SNR8	snoRNA	189	59.55	10	9.91425
SNR47	snoRNA	98	44.55	9	8.92283
SNR128	snoRNA	125	58.31	8	7.9314
SNR50	snoRNA	89	33.64	8	7.9314
SNR5	snoRNA	203	68.62	7	6.93998
SNR58	snoRNA	95	54.86	7	6.93998
SNR32	snoRNA	187	44.18	7	6.93998
SNR67	snoRNA	81	46.745	6	5.94855
SNR82	snoRNA	267	42.54	6	5.94855
SNR34	snoRNA	202	65.36	6	5.94855
SNR40	snoRNA	96	39.33	5	4.95713
SNR61	snoRNA	89	43.44	5	4.95713
SNR17A	snoRNA	333	39.86	5	4.95713
SNR65	snoRNA	99	104.34	4	3.9657
SNR62	snoRNA	99	49.77	4	3.9657
SNR56	snoRNA	87	61.99	4	3.9657
SNR85	snoRNA	170	79.905	4	3.9657
SNR11	snoRNA	257	50.16	4	3.9657
SNR39B	snoRNA	95	66.28	4	3.9657
SNR35	snoRNA	203	47.12	3	2.97428
SNR189	snoRNA	188	89.135	2	1.98285
SNR80	snoRNA	170	41.595	2	1.98285
SNR45	snoRNA	171	25.795	2	1.98285
SNR48	snoRNA	112	35.18	2	1.98285
SNR73	snoRNA	105	54.95	2	1.98285
SNR161	snoRNA	160	39.505	2	1.98285
SNR13	snoRNA	123	65.665	2	1.98285
NME1	snoRNA	339	68.23	2	1.98285
SNR37	snoRNA	385	72.69	2	1.98285
SNR70	snoRNA	163	59.245	2	1.98285
SNR51	snoRNA	106	34.96	1	0.991425
SNR81	snoRNA	200	158.38	1	0.991425
SNR52	snoRNA	91	56.96	1	0.991425
SNR46	snoRNA	196	52.29	1	0.991425
SNR71	snoRNA	89	19.62	1	0.991425
SNR79	snoRNA	83	52.92	1	0.991425
SNR78	snoRNA	86	35.28	1	0.991425
SNR72	snoRNA	97	70.17	1	0.991425
RDN25-2	rRNA	3395	37.31	118	116.988
NTS2-2	rRNA	1242	49.3	62	61.4684
RDN5-2	rRNA	118	32.43	56	55.5198
ITS1-2	rRNA	0	57.31	35	34.6999
ETS1-2	rRNA	699	62.02	24	23.7942
RDN18-2	rRNA	1799	58.155	22	21.8114
RDN58-2	rRNA	157	52.35	13	12.8885
NTS1-2	rRNA	914	60.575	8	7.9314
RDN37-2	rRNA	6266	31.3	6	5.94855
NTS2-1	rRNA	1242	45.76	5	4.95713
RDN5-6	rRNA	120	49.08	3	2.97428
RDN5-5	rRNA	118	51.71	2	1.98285
ITS2-2	rRNA	0	23.38	1	0.991425
RUF21	ncRNA	706	39.085	336	333.119
RUF20	ncRNA	442	40.18	228	226.045
IRT1	ncRNA	1488	54.665	36	35.6913
SRG1	ncRNA	550	58.43	29	28.7513
RUF5-2	ncRNA	709	50.255	8	7.9314
RUF5-1	ncRNA	709	43.84	6	5.94855
RME3	ncRNA	1904	71.35	5	4.95713
ICR1	ncRNA	3198	54.5	5	4.95713
SCR1	ncRNA	521	61.08	3	2.97428
RPR1	ncRNA	368	44.75	3	2.97428
RUF23	ncRNA	253	23.96	3	2.97428
RME2	ncRNA	2222	69.12	2	1.98285
PWR1	ncRNA	940	57.6	1	0.991425
TEF1	mRNA	1376	34.195	15060	14930.9
TDH2	mRNA	998	41.11	13476	13360.4
RPS31	mRNA	458	33.31	11031	10936.4
ENO2	mRNA	1313	37	10941	10847.2
TDH3	mRNA	998	39.87	10831	10738.1
ADH1	mRNA	1046	39.44	10500	10410
FBA1	mRNA	1079	37.69	10479	10389.1
GPM1	mRNA	743	36.58	10336	10247.4
CCW12	mRNA	401	42.79	9395	9314.44
PDC1	mRNA	1691	36.92	8575	8501.47
RPS12	mRNA	431	30.24	7240	7177.92
CDC19	mRNA	1502	38.5	5994	5942.6
RPS8B	mRNA	610	33.195	5794	5744.32
PGK1	mRNA	1250	41.435	5744	5694.75
TPI1	mRNA	746	38.905	5648	5599.57
RPL28	mRNA	450	32.92	5231	5186.15
RPL39	mRNA	156	35.04	4976	4933.33
RPS20	mRNA	365	33.04	4795	4753.88
RPL1A	mRNA	653	37.74	4513	4474.3
RPS2	mRNA	764	31.77	4471	4432.66
RPS4A	mRNA	786	33.22	4432	4394
RPS3	mRNA	722	34.96	4410	4372.18
RPL25	mRNA	429	32.555	4338	4300.8
RPL30	mRNA	318	34.8	4208	4171.92
RPS5	mRNA	677	32.89	4154	4118.38
RPL41A	mRNA	77	35.585	4094	4058.89
RPS23B	mRNA	438	30.61	4044	4009.32
RPS6A	mRNA	711	33.36	3943	3909.19
RPL38	mRNA	236	34.12	3942	3908.2
RPL3	mRNA	1163	37.455	3884	3850.7
RPL23B	mRNA	414	30.82	3878	3844.75
RPL41B	mRNA	77	37.11	3840	3807.07
RPL32	mRNA	393	32.04	3785	3752.54
RPL4B	mRNA	1088	38.96	3784	3751.55
RPL40A	mRNA	387	31.48	3709	3677.2
RPS10A	mRNA	318	37	3691	3659.35
RPS25A	mRNA	342	36.36	3617	3585.98
RPL18A	mRNA	561	34.32	3609	3578.05
RPL36B	mRNA	303	32.81	3559	3528.48
RPL27A	mRNA	411	31.695	3534	3503.7
RPS30A	mRNA	192	36.915	3528	3497.75
RPL26B	mRNA	384	33.85	3475	3445.2
RPS28A	mRNA	203	31.565	3380	3351.02
RPP0	mRNA	938	35.63	3372	3343.09
RPS9B	mRNA	588	31.96	3347	3318.3
RPL14A	mRNA	417	33.76	3345	3316.32
RPL9A	mRNA	575	34.21	3331	3302.44
RPL10	mRNA	665	41.46	3329	3300.45
RPL5	mRNA	893	36.09	3278	3249.89
RPL11A	mRNA	524	31.555	3244	3216.18
TMA19	mRNA	503	36.565	3224	3196.35
RPL42A	mRNA	321	31.79	3221	3193.38
RPP1A	mRNA	320	32.415	3194	3166.61
RPS26A	mRNA	370	32.33	3191	3163.64
RPS22A	mRNA	392	35.98	3190	3162.65
RPS27B	mRNA	249	33.745	3180	3152.73
RPL43A	mRNA	279	31.32	3168	3140.83
RPS15	mRNA	428	34.64	3147	3120.01
RPS13	mRNA	456	32.69	3142	3115.06
RPL31A	mRNA	342	31.33	3119	3092.26
RPL13B	mRNA	600	34.81	3071	3044.67
CWP2	mRNA	278	44.45	3053	3026.82
RPS24A	mRNA	408	29.84	3052	3025.83
RPS21A	mRNA	264	37.345	3050	3023.85
RPS14A	mRNA	414	33.49	3048	3021.86
RPS1B	mRNA	767	30.31	3043	3016.91
RPS7A	mRNA	573	31.37	3003	2977.25
RPL2A	mRNA	765	30.07	2993	2967.34
RPL33A	mRNA	324	32.38	2979	2953.46
CPR1	mRNA	488	35.35	2963	2937.59
RPL35B	mRNA	363	32.815	2954	2928.67
RPL22A	mRNA	366	33.96	2895	2870.18
RPP1B	mRNA	321	33.72	2878	2853.32
RPS21B	mRNA	264	30.51	2857	2832.5
RPL42B	mRNA	321	35.51	2852	2827.54
RPS18A	mRNA	441	33.69	2842	2817.63
RPL20B	mRNA	519	33.19	2837	2812.67
RPL12B	mRNA	497	32.27	2832	2807.72
RPL29	mRNA	183	31.885	2826	2801.77
RPL19B	mRNA	570	34.31	2791	2767.07
AHP1	mRNA	530	34.48	2785	2761.12
SSB2	mRNA	1841	34.775	2772	2748.23
RPL8B	mRNA	770	34.62	2763	2739.31
RPS18B	mRNA	441	33.22	2730	2706.59
RPS30B	mRNA	192	35.08	2715	2691.72
RPS23A	mRNA	438	31.52	2696	2672.88
RPP2B	mRNA	332	31.55	2687	2663.96
CUP1-2	mRNA	185	54.725	2686	2662.97
RPL2B	mRNA	765	33.57	2655	2632.23
RPL34B	mRNA	366	32.755	2642	2619.35
RPL40B	mRNA	387	37.245	2626	2603.48
ZEO1	mRNA	341	38.4	2594	2571.76
RPS1A	mRNA	767	35.355	2550	2528.13
RPL43B	mRNA	279	32.23	2549	2527.14
RPL21A	mRNA	483	33.76	2537	2515.25
RPL37B	mRNA	267	38.39	2505	2483.52
RPS16A	mRNA	432	34.295	2484	2462.7
RPS17B	mRNA	411	34.615	2476	2454.77
RPL21B	mRNA	483	35.04	2431	2410.15
RPS10B	mRNA	318	34.735	2426	2405.2
RPS17A	mRNA	411	34.17	2390	2369.51
RPL24A	mRNA	475	34.035	2322	2302.09
STM1	mRNA	821	33.25	2317	2297.13
RPS16B	mRNA	432	35.325	2302	2282.26
RPS19B	mRNA	435	33.855	2300	2280.28
RPL6A	mRNA	531	36.2	2292	2272.35
HOR7	mRNA	179	50.6	2285	2265.41
RPL37A	mRNA	267	35.565	2284	2264.42
RPL15A	mRNA	614	38.74	2257	2237.65
TSA1	mRNA	590	39.12	2163	2144.45
RPL16B	mRNA	597	36.28	2161	2142.47
RPL17A	mRNA	555	36.41	2156	2137.51
RPP2A	mRNA	320	38.565	2148	2129.58
RPS0A	mRNA	759	30.92	2131	2112.73
RPL19A	mRNA	570	33.38	2035	2017.55
EFT1	mRNA	2528	39.73	2016	1998.71
RPS11A	mRNA	471	34.175	1928	1911.47
RPS29B	mRNA	183	38.56	1901	1884.7
RPL20A	mRNA	519	35.5	1895	1878.75
SOD1	mRNA	464	35.34	1869	1852.97
RPS11B	mRNA	471	35.36	1859	1843.06
RPL23A	mRNA	414	30.96	1845	1829.18
RPL24B	mRNA	475	32.325	1816	1800.43
RPS29A	mRNA	176	33.42	1793	1777.63
RPL12A	mRNA	497	37.805	1786	1770.69
RPS19A	mRNA	435	33.14	1781	1765.73
RPL26A	mRNA	384	34.6	1720	1705.25
GPP1	mRNA	752	39.72	1688	1673.53
ENO1	mRNA	1313	55.84	1639	1624.95
RPL34A	mRNA	366	32.295	1636	1621.97
HHT2	mRNA	410	47.595	1634	1619.99
RPS26B	mRNA	360	36.14	1614	1600.16
RPS28B	mRNA	203	38.145	1608	1594.21
HHF1	mRNA	311	47.41	1605	1591.24
RPL27B	mRNA	411	36.265	1594	1580.33
HTA1	mRNA	398	43.815	1592	1578.35
HSC82	mRNA	2117	35.87	1559	1545.63
HHT1	mRNA	410	44.74	1547	1533.73
RPL33B	mRNA	324	29.3	1533	1519.85
RPS0B	mRNA	759	34.54	1523	1509.94
RPL16A	mRNA	600	35.2	1520	1506.97
PSA1	mRNA	1085	33.74	1513	1500.03
ACT1	mRNA	1128	38.12	1507	1494.08
PGI1	mRNA	1664	38.36	1494	1481.19
HTA2	mRNA	398	36.135	1464	1451.45
NKP1	mRNA	716	33.87	1463	1450.46
HTB1	mRNA	395	45.9	1392	1380.06
BMH1	mRNA	803	37.925	1386	1374.12
YEF3	mRNA	3134	38.88	1367	1355.28
SED1	mRNA	1016	55.72	1357	1345.36
TIF1	mRNA	1187	38.48	1330	1318.6
PMA1	mRNA	2756	48.41	1313	1301.74
RPL13A	mRNA	600	35.98	1312	1300.75
RPS25B	mRNA	340	34.13	1293	1281.91
RPL35A	mRNA	363	33.22	1265	1254.15
SSA2	mRNA	1919	38.04	1227	1216.48
RPL11B	mRNA	524	31.915	1194	1183.76
RPL36A	mRNA	303	31.605	1188	1177.81
HSP150	mRNA	1241	58.16	1180	1169.88
RPS27A	mRNA	249	38.96	1172	1161.95
ARF1	mRNA	545	32.14	1159	1149.06
RPL14B	mRNA	417	36	1151	1141.13
VMA3	mRNA	482	45.12	1111	1101.47
FPR1	mRNA	344	33.83	1109	1099.49
TRX2	mRNA	314	34.35	1101	1091.56
RPL17B	mRNA	555	36.73	1082	1072.72
MMF1	mRNA	437	39.565	1082	1072.72
GSP1	mRNA	659	37.49	1074	1064.79
EGD2	mRNA	524	34.89	1054	1044.96
EGD1	mRNA	473	34.71	1051	1041.99
RPS24B	mRNA	408	39.04	1027	1018.19
COF1	mRNA	432	32.77	1025	1016.21
NCE102	mRNA	521	53.27	1023	1014.23
MRH1	mRNA	962	52.49	1020	1011.25
HXT3	mRNA	1703	52.85	1011	1002.33
GAS1	mRNA	1679	44.625	998	989.442
RPL31B	mRNA	342	34.945	996	987.459
MBF1	mRNA	455	59.6	992	983.494
ECM33	mRNA	1290	46.02	950	941.854
ASP3-4	mRNA	1088	43.89	923	915.085
CIS3	mRNA	683	43.69	923	915.085
GCN4	mRNA	845	47.04	917	909.137
RPS7B	mRNA	573	38.78	910	902.197
HHF2	mRNA	311	45.87	899	891.291
RPL8A	mRNA	770	38.07	884	876.42
HTB2	mRNA	395	41.78	859	851.634
RPL6B	mRNA	531	37.5	856	848.66
PMP3	mRNA	167	52.2	837	829.823
NOP10	mRNA	176	36.91	836	828.831
BGL2	mRNA	941	48.865	830	822.883
SUI1	mRNA	326	42.195	828	820.9
TRX1	mRNA	311	35.475	826	818.917
ACB1	mRNA	263	37.73	801	794.132
PMP1	mRNA	122	49.23	796	789.174
KTR5	mRNA	1568	46.96	785	778.269
HYP2	mRNA	473	45.52	783	776.286
PFY1	mRNA	381	39.24	773	766.372
PDR5	mRNA	4535	48.77	763	756.457
HXK2	mRNA	1460	47.215	762	755.466
HSP10	mRNA	320	37.855	756	749.517
IPP1	mRNA	863	37.09	731	724.732
PDI1	mRNA	1568	35.3	728	721.758
SNU13	mRNA	380	39.765	726	719.775
TMA7	mRNA	194	33.74	719	712.835
TDH1	mRNA	998	66.04	717	710.852
MFA1	mRNA	110	48.365	706	699.946
GIS2	mRNA	461	34.185	702	695.98
HSP104	mRNA	2726	57	702	695.98
HSP30	mRNA	998	54.9	700	693.998
SND3	mRNA	566	41.04	691	685.075
PNC1	mRNA	650	51.2	688	682.101
PMP2	mRNA	131	59.94	686	680.118
GLN1	mRNA	1112	45.445	682	676.152
RPL9B	mRNA	575	38.82	675	669.212
OLA1	mRNA	1184	38.725	672	666.238
SEC53	mRNA	764	38.69	670	664.255
POR1	mRNA	851	45.25	659	653.349
YOP1	mRNA	543	45.945	658	652.358
YRB1	mRNA	605	41.2	637	631.538
SSS1	mRNA	242	35.7	630	624.598
SSE1	mRNA	2081	35.21	619	613.692
SAH1	mRNA	1349	40.675	616	610.718
RTN1	mRNA	887	45.715	614	608.735
CDC33	mRNA	641	37.395	612	606.752
UBC4	mRNA	447	44.6	609	603.778
STF2	mRNA	254	56	591	585.932
CTS1	mRNA	1688	48.75	589	583.949
SBA1	mRNA	650	36.9	589	583.949
SRL1	mRNA	632	40.92	589	583.949
TIP1	mRNA	632	49.47	588	582.958
TIF11	mRNA	461	33.97	587	581.967
BAT1	mRNA	1181	40.83	579	574.035
SSC1	mRNA	1964	47.885	578	573.044
STE2	mRNA	1295	43.62	573	568.087
LSP1	mRNA	1025	47.62	569	564.121
KRS1	mRNA	1775	35.925	568	563.129
VTC1	mRNA	389	39.055	568	563.129
HSP82	mRNA	2129	54.45	564	559.164
VOA1	mRNA	797	38.88	556	551.232
CYS4	mRNA	1523	41.29	556	551.232
YDJ1	mRNA	1229	43.15	549	544.292
YDL124W	mRNA	938	59.065	544	539.335
TAL1	mRNA	1007	40.92	543	538.344
MPC2	mRNA	389	44.585	538	533.387
ARC1	mRNA	1130	35.71	534	529.421
SES1	mRNA	1388	36.04	534	529.421
SUB2	mRNA	1340	39.96	533	528.43
OYE2	mRNA	1202	39.15	531	526.447
VMA4	mRNA	701	39.5	531	526.447
APE3	mRNA	1613	38.405	524	519.507
ADK1	mRNA	668	40.56	523	518.515
PIL1	mRNA	1019	49.37	522	517.524
IMD4	mRNA	1575	42.65	517	512.567
SIS1	mRNA	1058	48.13	512	507.61
KAR2	mRNA	2048	43.64	509	504.635
GUK1	mRNA	563	36	507	502.653
HOM2	mRNA	1097	35.7	504	499.678
THS1	mRNA	2204	36.83	501	496.704
SBH2	mRNA	266	38.12	501	496.704
URA1	mRNA	944	42.41	499	494.721
GLK1	mRNA	1502	61.07	497	492.738
TRR1	mRNA	959	37.83	492	487.781
GND1	mRNA	1469	40.735	492	487.781
ZUO1	mRNA	1301	36.67	491	486.79
NSR1	mRNA	1244	40.945	488	483.815
FCY1	mRNA	476	39.605	486	481.833
NOP1	mRNA	983	39.4	483	478.858
HSP60	mRNA	1718	43.845	480	475.884
EMP24	mRNA	611	36.67	477	472.91
ASN2	mRNA	1718	40.11	477	472.91
CCW14	mRNA	716	48.02	476	471.918
ADO1	mRNA	1022	29.88	473	468.944
TIM10	mRNA	281	36.445	466	462.004
CBR1	mRNA	854	36.42	461	457.047
TKL1	mRNA	2042	37.56	460	456.056
YRA1	mRNA	681	40.155	460	456.056
EXG1	mRNA	1346	41.815	460	456.056
SML1	mRNA	314	50.34	458	454.073
SCW10	mRNA	1169	47.72	457	453.081
DED81	mRNA	1664	37.71	457	453.081
LEU1	mRNA	2339	44.26	457	453.081
HOM6	mRNA	1079	35.465	454	450.107
VMA10	mRNA	345	35.965	454	450.107
RPL18B	mRNA	561	42.59	452	448.124
SSZ1	mRNA	1616	34.42	451	447.133
NHP2	mRNA	470	36.33	450	446.141
ATP2	mRNA	1535	42.87	449	445.15
ERG3	mRNA	1097	42.97	448	444.158
HNT1	mRNA	477	47.445	446	442.176
MFA2	mRNA	116	48.4	444	440.193
RGI1	mRNA	485	64	443	439.201
YPL225W	mRNA	440	40.64	443	439.201
ADH3	mRNA	1127	39.195	442	438.21
PDA1	mRNA	1262	36.84	442	438.21
YER010C	mRNA	704	37	441	437.218
CHA1	mRNA	1082	42.96	439	435.236
GUA1	mRNA	1577	37.48	435	431.27
YPT1	mRNA	620	36.87	435	431.27
ILV5	mRNA	1187	54.1	432	428.296
BMH2	mRNA	905	43.135	432	428.296
YNL208W	mRNA	599	42.055	430	426.313
GRS1	mRNA	2003	37.31	429	425.321
UGP1	mRNA	1499	55.675	428	424.33
YLR257W	mRNA	965	50.68	427	423.339
YBR085C-A	mRNA	257	56.355	424	420.364
RNR4	mRNA	1037	35.845	424	420.364
ARF2	mRNA	585	41.25	421	417.39
SAR1	mRNA	573	37.195	420	416.399
ERG11	mRNA	1592	39.345	418	414.416
MIC26	mRNA	701	40.215	418	414.416
IDH2	mRNA	1109	43.54	415	411.441
RPS4B	mRNA	786	36.55	415	411.441
NOP56	mRNA	1514	34.85	415	411.441
SGT2	mRNA	1040	41.5	415	411.441
SUI3	mRNA	857	37.24	411	407.476
SMT3	mRNA	305	33.735	410	406.484
HSP42	mRNA	1127	51.9	406	402.519
TIF34	mRNA	1043	39.6	405	401.527
GUS1	mRNA	2126	39	404	400.536
UTH1	mRNA	1097	50.19	403	399.544
HXT2	mRNA	1625	59.16	403	399.544
PRC1	mRNA	1598	43.89	403	399.544
ERG2	mRNA	668	35.89	401	397.561
CMD1	mRNA	443	40.77	400	396.57
SAM1	mRNA	1148	38.515	400	396.57
THR4	mRNA	1544	40.855	398	394.587
STI1	mRNA	1769	47.42	398	394.587
VMA13	mRNA	1436	41.25	398	394.587
RHO1	mRNA	629	44.59	397	393.596
PDB1	mRNA	1100	37.93	397	393.596
HPT1	mRNA	665	42.55	392	388.639
ARO4	mRNA	1112	37.64	391	387.647
CMK2	mRNA	1343	57.765	390	386.656
SBP1	mRNA	884	34.89	389	385.664
ADE13	mRNA	1448	43.645	386	382.69
YGP1	mRNA	1064	61.24	385	381.699
UTR2	mRNA	1403	36.44	384	380.707
RIM1	mRNA	408	40.465	382	378.724
NTF2	mRNA	377	37.435	382	378.724
SUP45	mRNA	1313	38.96	377	373.767
RPL1B	mRNA	653	41.84	376	372.776
PYP1	mRNA	725	37.5	375	371.784
RPL7B	mRNA	736	35.68	375	371.784
TPS1	mRNA	1487	51.81	374	370.793
PAA1	mRNA	575	40.475	374	370.793
TPM1	mRNA	599	35.17	373	369.802
ERV25	mRNA	635	34.86	370	366.827
CPR5	mRNA	677	38.54	369	365.836
CYS3	mRNA	1184	38.95	369	365.836
YSY6	mRNA	197	35.6	363	359.887
VMA7	mRNA	356	46.67	363	359.887
RPB10	mRNA	212	44.8	360	356.913
TOM6	mRNA	185	40.08	359	355.922
YET1	mRNA	620	48.775	358	354.93
RPO26	mRNA	468	38.91	358	354.93
ALD6	mRNA	1502	40.02	358	354.93
SEM1	mRNA	269	35.55	357	353.939
ERG20	mRNA	1058	38.77	355	351.956
TIF35	mRNA	824	35.04	355	351.956
CPR6	mRNA	1115	43.5	351	347.99
PEP4	mRNA	1217	39.66	350	346.999
PRE9	mRNA	776	40.12	349	346.007
QCR8	mRNA	284	48.08	349	346.007
ILV3	mRNA	1757	41.625	348	345.016
GRX1	mRNA	332	44.1	347	344.025
ERG6	mRNA	1151	39.02	346	343.033
ELO3	mRNA	1037	38.085	346	343.033
SNA3	mRNA	401	42.37	345	342.042
SPI1	mRNA	446	65.06	344	341.05
ARO2	mRNA	1130	35.17	343	340.059
BAP2	mRNA	1829	58.59	342	339.067
PRS1	mRNA	1283	45.04	341	338.076
IMD3	mRNA	1571	37.96	340	337.085
CDC48	mRNA	2507	43.14	339	336.093
SCS2	mRNA	734	39.925	338	335.102
YNK1	mRNA	461	44.74	337	334.11
VMA11	mRNA	494	39.61	337	334.11
TYS1	mRNA	1184	36.845	336	333.119
ERG10	mRNA	1196	37.48	335	332.127
HXT6	mRNA	1712	64.67	335	332.127
IRC22	mRNA	677	31.13	334	331.136
VMA6	mRNA	1037	43.68	334	331.136
PUP2	mRNA	782	38.83	333	330.145
ABF2	mRNA	551	49.445	332	329.153
PHO84	mRNA	1763	43.765	332	329.153
ERG4	mRNA	1421	40.15	330	327.17
ERG25	mRNA	929	43.62	329	326.179
CWP1	mRNA	719	48.97	327	324.196
SAM4	mRNA	977	35.7	325	322.213
CAM1	mRNA	1247	39.79	324	321.222
FCY2	mRNA	1601	42.265	324	321.222
FRS1	mRNA	1787	41.595	324	321.222
ACO1	mRNA	2336	42.55	323	320.23
MEO1	mRNA	206	55.905	322	319.239
PHO3	mRNA	1403	41.55	321	318.247
RDL1	mRNA	419	41.73	321	318.247
GAR1	mRNA	617	34.71	321	318.247
RET3	mRNA	569	38.15	320	317.256
TIF3	mRNA	1310	35.625	320	317.256
GDH1	mRNA	1364	35.925	320	317.256
GPD1	mRNA	1175	50.165	320	317.256
ILS1	mRNA	3218	41.66	319	316.265
PET9	mRNA	956	42	319	316.265
DPS1	mRNA	1673	38.095	318	315.273
HXK1	mRNA	1457	61.45	316	313.29
PGA3	mRNA	938	37.065	316	313.29
RPL22B	mRNA	369	46.685	316	313.29
SCL1	mRNA	758	41.095	314	311.308
SBH1	mRNA	248	40.44	314	311.308
PRE2	mRNA	863	43.075	314	311.308
GET3	mRNA	1064	34.43	314	311.308
PFK1	mRNA	2963	46.19	313	310.316
RPN8	mRNA	1016	38.04	312	309.325
YLR179C	mRNA	605	43.54	311	308.333
OLE1	mRNA	1532	51.55	311	308.333
TOS1	mRNA	1367	38.765	308	305.359
PIR1	mRNA	1025	53.04	307	304.368
ECM15	mRNA	314	35.615	306	303.376
RPS14B	mRNA	417	41.08	305	302.385
YET3	mRNA	611	48.9	304	301.393
ADE12	mRNA	1301	41.83	304	301.393
HXT1	mRNA	1712	45.38	303	300.402
RIB4	mRNA	509	37.18	303	300.402
VMA8	mRNA	770	35.68	303	300.402
SSA1	mRNA	1928	51.83	302	299.41
CAF20	mRNA	485	41.76	302	299.41
ATP15	mRNA	188	46.68	301	298.419
GCV3	mRNA	512	31.21	301	298.419
SHR3	mRNA	632	36.815	298	295.445
VPH1	mRNA	2522	44.7	297	294.453
TIF5	mRNA	1217	43.32	295	292.47
HIS1	mRNA	893	37.86	295	292.47
PST2	mRNA	596	38.92	293	290.488
MLC1	mRNA	449	38.15	292	289.496
PRE6	mRNA	764	34.54	292	289.496
ERV14	mRNA	416	43.86	291	288.505
PRE5	mRNA	704	42.12	290	287.513
ASN1	mRNA	1718	35.42	290	287.513
NPL3	mRNA	1244	42.48	289	286.522
PRE3	mRNA	648	40.27	289	286.522
APA1	mRNA	965	43.12	289	286.522
YRO2	mRNA	1034	57.385	288	285.53
PRE1	mRNA	596	40.825	288	285.53
RFS1	mRNA	632	55.32	285	282.556
ARB1	mRNA	1832	41.59	285	282.556
LSM6	mRNA	260	40.14	285	282.556
NCW2	mRNA	764	51.13	283	280.573
DUG1	mRNA	1445	39.29	283	280.573
YKT6	mRNA	602	35.85	281	278.59
RPS8A	mRNA	610	35.17	280	277.599
ZRC1	mRNA	1328	41.905	280	277.599
WTM1	mRNA	1313	44.54	279	276.608
VAS1	mRNA	3314	39.01	278	275.616
CBF5	mRNA	1451	37.23	277	274.625
SPO24	mRNA	203	63.58	277	274.625
FRS2	mRNA	1511	40.96	277	274.625
RPT1	mRNA	1403	38.895	276	273.633
HMO1	mRNA	740	39.085	276	273.633
EFB1	mRNA	621	39.17	276	273.633
WBP1	mRNA	1292	39.35	275	272.642
RPB8	mRNA	440	32.85	275	272.642
PMT2	mRNA	2279	38.42	275	272.642
DDR48	mRNA	1292	48.74	275	272.642
CRH1	mRNA	1523	36.69	274	271.65
SUI2	mRNA	914	40.08	273	270.659
ATP4	mRNA	734	42.035	272	269.668
SCW4	mRNA	1160	56.04	272	269.668
URA5	mRNA	680	41.735	272	269.668
HCR1	mRNA	797	38.68	271	268.676
TSC13	mRNA	932	41.4	271	268.676
VMA1	mRNA	3215	43.74	271	268.676
RPN6	mRNA	1304	44.25	270	267.685
ATP18	mRNA	179	36.465	270	267.685
RPB5	mRNA	647	42.465	270	267.685
SNC2	mRNA	347	41	268	265.702
ATP1	mRNA	1637	45.98	268	265.702
TPS2	mRNA	2690	64.07	267	264.711
OST1	mRNA	1430	39.42	267	264.711
ERV46	mRNA	1247	38.48	267	264.711
TPO3	mRNA	1868	53.83	266	263.719
HRI1	mRNA	734	38.83	266	263.719
PUP3	mRNA	617	42.79	265	262.728
PIS1	mRNA	662	45.21	264	261.736
YMR295C	mRNA	593	45.24	264	261.736
PRE4	mRNA	800	39.925	264	261.736
RPC10	mRNA	212	43.11	263	260.745
SVS1	mRNA	782	42.61	263	260.745
HMF1	mRNA	389	42.12	261	258.762
CDC60	mRNA	3272	40.875	260	257.771
RPN5	mRNA	1337	42.44	259	256.779
ADE5_2C7	mRNA	2408	38.19	259	256.779
LAT1	mRNA	1448	37.89	259	256.779
RAS2	mRNA	968	40.265	258	255.788
MIX17	mRNA	470	44.305	258	255.788
LIA1	mRNA	977	35.315	258	255.788
TMA10	mRNA	260	61.5	257	254.796
SPE3	mRNA	881	41.17	257	254.796
YDR341C	mRNA	1823	37.89	257	254.796
APT1	mRNA	563	44.44	256	253.805
FKS1	mRNA	5630	49.61	255	252.813
INA1	mRNA	2027	47.86	255	252.813
PRT1	mRNA	2291	43.79	255	252.813
ARC15	mRNA	464	39.36	255	252.813
FAS2	mRNA	5663	45.28	255	252.813
IFA38	mRNA	1043	41.5	254	251.822
CIT1	mRNA	1439	52.42	253	250.831
RTC3	mRNA	335	59.27	253	250.831
PRE10	mRNA	866	41.81	253	250.831
DYS1	mRNA	1163	37.36	252	249.839
ARP2	mRNA	1176	43.215	252	249.839
YSA1	mRNA	695	43.265	252	249.839
SER1	mRNA	1187	36.87	251	248.848
GCD11	mRNA	1583	37.555	250	247.856
HTS1	mRNA	1640	34.845	250	247.856
TSC3	mRNA	242	41.86	249	246.865
ERG24	mRNA	1316	39.685	248	245.873
THR1	mRNA	1073	41.88	247	244.882
EMC4	mRNA	572	42.08	247	244.882
PAB1	mRNA	1733	45.81	247	244.882
DBP2	mRNA	1641	37.29	247	244.882
GRX2	mRNA	431	49.255	246	243.891
CCT4	mRNA	1586	36.21	246	243.891
ARA1	mRNA	1034	50.18	246	243.891
NHP6A	mRNA	281	40	245	242.899
PIC2	mRNA	902	50	245	242.899
RPT6	mRNA	1217	42.15	244	241.908
PRY2	mRNA	989	43.245	244	241.908
FUR1	mRNA	650	40.96	243	240.916
PGA2	mRNA	389	33.905	242	239.925
GDT1	mRNA	842	43.175	242	239.925
LSM7	mRNA	348	39.875	242	239.925
CLC1	mRNA	701	39.08	241	238.933
TOM5	mRNA	152	43.92	241	238.933
ATP16	mRNA	482	36.595	240	237.942
CIP1	mRNA	1145	57.26	240	237.942
MGE1	mRNA	686	39.11	240	237.942
TMC1	mRNA	452	55.42	239	236.951
FAS1	mRNA	6155	47.92	239	236.951
PRO3	mRNA	860	37.84	238	235.959
YHB1	mRNA	1199	41.93	238	235.959
PTH2	mRNA	626	41.41	237	234.968
YMR226C	mRNA	803	36.88	237	234.968
ERP1	mRNA	659	39.74	237	234.968
GAS5	mRNA	1454	47.52	236	233.976
ILV6	mRNA	929	39.94	236	233.976
RPT2	mRNA	1313	44.6	236	233.976
LHP1	mRNA	827	33.49	236	233.976
ADH6	mRNA	1082	39.83	235	232.985
IDH1	mRNA	1082	47.92	235	232.985
SOP4	mRNA	704	37.48	235	232.985
PFK2	mRNA	2879	51.56	234	231.993
NDE1	mRNA	1682	53.345	234	231.993
TMH11	mRNA	317	41.43	234	231.993
MAP1	mRNA	1163	40.96	234	231.993
ELO2	mRNA	1043	43.32	233	231.002
RPN13	mRNA	470	43.17	233	231.002
ATP17	mRNA	305	44.875	232	230.011
CTF8	mRNA	401	40.76	231	229.019
RPN3	mRNA	1571	40.52	230	228.028
PST1	mRNA	1334	47.755	230	228.028
RPS9A	mRNA	594	37.64	229	227.036
SHB17	mRNA	815	39.07	229	227.036
CCT8	mRNA	1706	41.73	229	227.036
YPT31	mRNA	671	37.62	228	226.045
RPC40	mRNA	1007	36.66	226	224.062
PUN1	mRNA	791	53.955	226	224.062
CCT2	mRNA	1583	36.155	226	224.062
MRP8	mRNA	659	48.935	226	224.062
KRE2	mRNA	1328	49.42	225	223.071
PMT1	mRNA	2453	39.4	224	222.079
PRE8	mRNA	752	45.27	224	222.079
GPX2	mRNA	488	46.375	224	222.079
PUP1	mRNA	785	44.705	224	222.079
YHR020W	mRNA	2066	39.735	224	222.079
VMA5	mRNA	1178	42.83	224	222.079
COX7	mRNA	182	46.05	224	222.079
QCR7	mRNA	383	41.77	223	221.088
SDH3	mRNA	596	37.9	223	221.088
ACP1	mRNA	377	45	223	221.088
HXT4	mRNA	1730	64.39	223	221.088
FAA4	mRNA	2084	46.23	223	221.088
YPT7	mRNA	626	34.295	222	220.096
SUR2	mRNA	1049	48.69	222	220.096
OST5	mRNA	261	44.36	222	220.096
RRB1	mRNA	1535	38.96	221	219.105
BTN2	mRNA	1232	63.25	221	219.105
TEF4	mRNA	1239	37.52	221	219.105
WRS1	mRNA	1298	38.04	220	218.114
GLC7	mRNA	939	44.215	220	218.114
TUF1	mRNA	1313	47.32	219	217.122
HAC1	mRNA	717	56.63	219	217.122
CPR3	mRNA	548	39.76	219	217.122
STT3	mRNA	2156	40.24	219	217.122
ARP3	mRNA	1349	39.56	219	217.122
SUP35	mRNA	2057	43	218	216.131
TVP18	mRNA	503	48.53	218	216.131
NPT1	mRNA	1289	49.05	218	216.131
ARC19	mRNA	515	41.535	218	216.131
MRT4	mRNA	710	38.94	218	216.131
DSE1	mRNA	1721	53.48	217	215.139
LYS12	mRNA	1115	39	217	215.139
GLY1	mRNA	1163	59.08	216	214.148
RNR2	mRNA	1199	45.045	216	214.148
SOD2	mRNA	701	40.72	216	214.148
KRE1	mRNA	941	52.385	216	214.148
RPN1	mRNA	2981	42.64	215	213.156
SFT1	mRNA	294	47.07	215	213.156
SAC6	mRNA	1929	48.2	215	213.156
VPS68	mRNA	554	44.74	215	213.156
TIF2	mRNA	1187	39	215	213.156
COX8	mRNA	236	44	215	213.156
NHP6B	mRNA	327	46.79	214	212.165
RNA1	mRNA	1223	36.08	214	212.165
LSB1	mRNA	725	54	213	211.174
BAT2	mRNA	1130	32.96	213	211.174
CDC42	mRNA	575	42.44	212	210.182
ITR1	mRNA	1754	37.515	212	210.182
BRX1	mRNA	875	35.765	212	210.182
YCP4	mRNA	743	39.98	212	210.182
DSE2	mRNA	977	55.61	211	209.191
MIC10	mRNA	293	38.33	211	209.191
CCT6	mRNA	1640	41.82	211	209.191
SEC13	mRNA	893	40.8	211	209.191
LPD1	mRNA	1499	38.46	211	209.191
FET3	mRNA	1910	45.78	210	208.199
AMN1	mRNA	1649	53.79	210	208.199
YIP3	mRNA	531	48.365	210	208.199
OST2	mRNA	392	44.39	209	207.208
SCS7	mRNA	1154	46.08	209	207.208
URA6	mRNA	614	40.4	209	207.208
PRE7	mRNA	725	44.22	209	207.208
CCS1	mRNA	749	35.63	209	207.208
ARC40	mRNA	1154	43.65	208	206.216
SHM2	mRNA	1409	41.155	208	206.216
ERP2	mRNA	647	35.375	208	206.216
PMI40	mRNA	1290	40.73	208	206.216
AAT2	mRNA	1256	44.375	208	206.216
SEC28	mRNA	890	36.415	208	206.216
TAT1	mRNA	1859	45.765	208	206.216
SSB1	mRNA	1841	33.825	208	206.216
PUB1	mRNA	1361	45.75	207	205.225
SKP1	mRNA	584	41.04	207	205.225
ACS2	mRNA	2051	42.86	207	205.225
RVS167	mRNA	1448	42.875	206	204.234
ILV2	mRNA	2063	52.225	206	204.234
MCR1	mRNA	965	50.14	205	203.242
FES1	mRNA	872	54.4	205	203.242
SSH1	mRNA	1472	42.25	204	202.251
CCT5	mRNA	1688	40.265	204	202.251
ILV1	mRNA	1730	37.04	203	201.259
ELO1	mRNA	932	44.7	202	200.268
EGT2	mRNA	3125	49.47	202	200.268
SDD2	mRNA	437	33.855	202	200.268
VMA2	mRNA	1553	49.99	202	200.268
RLP7	mRNA	968	44.71	202	200.268
TIM11	mRNA	290	42.42	201	199.276
ATP7	mRNA	524	42.625	200	198.285
HOG1	mRNA	1307	43.53	200	198.285
MES1	mRNA	2255	41.875	200	198.285
ATP3	mRNA	935	38.275	200	198.285
RIB3	mRNA	626	39.89	199	197.294
TIM17	mRNA	476	40.44	199	197.294
GVP36	mRNA	980	39.96	199	197.294
TPO2	mRNA	1844	55.56	198	196.302
RVS161	mRNA	797	55.315	198	196.302
RPT4	mRNA	1313	43.715	198	196.302
IDI1	mRNA	866	39	198	196.302
ATP19	mRNA	206	37.4	197	195.311
TMA20	mRNA	546	36.71	197	195.311
PRS3	mRNA	962	46.55	196	194.319
MDM34	mRNA	1379	42.39	195	193.328
HTZ1	mRNA	404	40.94	195	193.328
DIA1	mRNA	1010	59.05	195	193.328
FPR3	mRNA	1235	33.03	195	193.328
RPN10	mRNA	806	36.14	195	193.328
LCB2	mRNA	1685	37.935	194	192.336
RFA3	mRNA	368	35.895	194	192.336
YMR315W	mRNA	1049	49.23	194	192.336
KTR4	mRNA	1394	49.155	194	192.336
AIM29	mRNA	467	40.93	193	191.345
ASC1	mRNA	960	36.57	193	191.345
UMP1	mRNA	446	41.81	193	191.345
GLN4	mRNA	2429	40.4	193	191.345
EMI2	mRNA	1502	59.09	193	191.345
ADE16	mRNA	1775	40.73	193	191.345
COX13	mRNA	389	39.12	193	191.345
LSM5	mRNA	281	32.33	193	191.345
TUB1	mRNA	1344	37.74	193	191.345
TCB3	mRNA	4637	39.725	192	190.354
HMRA1	mRNA	382	41.73	192	190.354
TOM7	mRNA	182	43.495	192	190.354
NIP7	mRNA	545	40.33	191	189.362
STP4	mRNA	1472	53	191	189.362
LIP1	mRNA	452	40.61	191	189.362
RPN11	mRNA	920	46	191	189.362
NOP58	mRNA	1535	43.22	191	189.362
AHC2	mRNA	386	39.135	190	188.371
YRF1-7	mRNA	5580	56.58	190	188.371
DSK2	mRNA	1121	41.89	190	188.371
ATP14	mRNA	374	49.75	189	187.379
TIM8	mRNA	263	42.29	189	187.379
TPM2	mRNA	485	36.71	189	187.379
ACC1	mRNA	6701	36.83	189	187.379
CHO2	mRNA	2609	47.84	189	187.379
TSL1	mRNA	3296	61.46	189	187.379
YMR099C	mRNA	893	39.26	189	187.379
SRP21	mRNA	503	43.58	188	186.388
LSM2	mRNA	288	47.14	188	186.388
RVB1	mRNA	1391	40.25	188	186.388
CHO1	mRNA	830	46.33	187	185.397
OXA1	mRNA	1208	44.56	187	185.397
TOM22	mRNA	458	45.22	187	185.397
GDA1	mRNA	1556	40.76	186	184.405
LSM1	mRNA	518	43.94	186	184.405
BAP3	mRNA	1814	48.83	185	183.414
ATG27	mRNA	815	38.04	185	183.414
WWM1	mRNA	635	32.62	185	183.414
GPD2	mRNA	1322	49.12	185	183.414
AYR1	mRNA	893	46.095	184	182.422
RPN7	mRNA	1289	42.1	183	181.431
COX12	mRNA	251	44.17	183	181.431
GET1	mRNA	707	39.96	183	181.431
SFM1	mRNA	641	37.48	183	181.431
NOP7	mRNA	1817	37.32	183	181.431
PHO12	mRNA	1403	40.16	182	180.439
SRP14	mRNA	440	40.615	182	180.439
PRO2	mRNA	1370	39.97	181	179.448
COS1	mRNA	1145	51.51	181	179.448
SVF1	mRNA	1445	46.9	181	179.448
YRF1-5	mRNA	5390	54.71	181	179.448
TMA22	mRNA	596	40.81	181	179.448
UBI4	mRNA	1145	64	181	179.448
CCT7	mRNA	1652	45.53	180	178.457
ALA1	mRNA	2876	41.215	180	178.457
SEC62	mRNA	824	39.535	180	178.457
URA4	mRNA	1094	38.43	179	177.465
RPE1	mRNA	716	37.81	179	177.465
GDI1	mRNA	1355	51.08	179	177.465
RPN2	mRNA	2837	41.9	178	176.474
EGO4	mRNA	296	66.915	178	176.474
AHA1	mRNA	1052	43.035	178	176.474
GNA1	mRNA	479	40.385	178	176.474
RPG1	mRNA	2894	43.885	178	176.474
SND2	mRNA	545	41.41	177	175.482
AGA2	mRNA	263	43.68	177	175.482
ZPR1	mRNA	1460	54.54	177	175.482
GLO1	mRNA	980	47.95	176	174.491
BAR1	mRNA	1763	46.945	176	174.491
NAP1	mRNA	1253	37.555	176	174.491
SEC63	mRNA	1991	39.76	176	174.491
MNP1	mRNA	584	44.925	176	174.491
CCT3	mRNA	1604	45.44	176	174.491
GBP2	mRNA	1283	43.31	176	174.491
SRP1	mRNA	1628	40.22	175	173.499
FPR4	mRNA	1178	31.81	175	173.499
FUN12	mRNA	3008	43.29	175	173.499
TRP5	mRNA	2123	41.22	175	173.499
SWP1	mRNA	860	41.66	175	173.499
PHO86	mRNA	935	34.03	173	171.517
PHO13	mRNA	938	48.155	172	170.525
SCP160	mRNA	3668	41.2	172	170.525
MNN9	mRNA	1187	36.78	172	170.525
TIM23	mRNA	668	40.32	172	170.525
ERO1	mRNA	1691	49.095	172	170.525
SLT2	mRNA	1454	48.795	172	170.525
TUB3	mRNA	1338	37.74	171	169.534
TNA1	mRNA	1604	49.8	171	169.534
DPM1	mRNA	803	44.4	171	169.534
ADE3	mRNA	2840	46.8	171	169.534
HCH1	mRNA	461	45.68	171	169.534
URM1	mRNA	299	36.92	171	169.534
TYE7	mRNA	875	56.17	171	169.534
VMA16	mRNA	641	45.12	171	169.534
ATP5	mRNA	638	40.71	170	168.542
OAC1	mRNA	974	42.73	170	168.542
VTC3	mRNA	2507	38	170	168.542
ZWF1	mRNA	1517	47.96	170	168.542
LOG1	mRNA	737	41.335	170	168.542
RPN12	mRNA	824	44.13	169	167.551
GIM4	mRNA	336	35.46	169	167.551
ORM2	mRNA	650	52.41	168	166.559
GET4	mRNA	938	43.06	168	166.559
RPT3	mRNA	1286	46.2	168	166.559
BNA7	mRNA	785	41.5	167	165.568
BUR6	mRNA	428	39	167	165.568
HYR1	mRNA	491	38.33	167	165.568
GSY1	mRNA	2126	58.53	167	165.568
FTR1	mRNA	1214	41.43	167	165.568
FSH1	mRNA	731	40.13	167	165.568
SRP40	mRNA	1220	37.16	166	164.577
POL30	mRNA	776	35.72	166	164.577
MDH3	mRNA	1031	40.72	166	164.577
RUB1	mRNA	234	36.815	166	164.577
PHS1	mRNA	653	44.5	165	163.585
SUR7	mRNA	908	42.42	165	163.585
UBC7	mRNA	497	43.38	165	163.585
EMC1	mRNA	2282	46.13	165	163.585
PBI2	mRNA	227	52.91	165	163.585
UIP3	mRNA	707	51.945	164	162.594
RER1	mRNA	566	43.645	164	162.594
HRP1	mRNA	1604	42.02	164	162.594
IGO1	mRNA	506	55.05	164	162.594
ARL1	mRNA	551	42.51	164	162.594
ESF1	mRNA	1886	51.87	163	161.602
HAP4	mRNA	1664	54.25	163	161.602
YOS1	mRNA	259	38.04	163	161.602
ADE17	mRNA	1778	42.645	162	160.611
ASP1	mRNA	1145	41.06	162	160.611
KTR1	mRNA	1181	46.18	162	160.611
PEA2	mRNA	1262	41.64	161	159.619
KRE9	mRNA	830	48.39	161	159.619
YDC1	mRNA	953	55.09	161	159.619
PTC3	mRNA	1406	42.64	161	159.619
TOM70	mRNA	1853	45.85	161	159.619
GSF2	mRNA	1211	50.12	160	158.628
ECM14	mRNA	1292	40.655	160	158.628
VPS74	mRNA	1037	40.165	160	158.628
CRS1	mRNA	2303	38.985	160	158.628
COQ5	mRNA	923	39.595	160	158.628
TCP1	mRNA	1679	43.92	159	157.637
AIM17	mRNA	1397	59.32	159	157.637
NIT3	mRNA	875	39.04	159	157.637
PGM2	mRNA	1709	61.59	159	157.637
SEC61	mRNA	1442	46.26	159	157.637
TIF4631	mRNA	2858	44.67	159	157.637
COX5B	mRNA	456	47.07	159	157.637
NOP15	mRNA	662	38.69	159	157.637
APD1	mRNA	950	43.765	158	156.645
ARO8	mRNA	1502	38.77	158	156.645
SRV2	mRNA	1580	42.555	158	156.645
IMP1	mRNA	572	47.1	158	156.645
MNN10	mRNA	1181	43.6	158	156.645
UBA1	mRNA	3074	45.42	157	155.654
ALD5	mRNA	1562	54.57	157	155.654
KTR3	mRNA	1214	38.88	157	155.654
LTP1	mRNA	485	35.965	156	154.662
BFR1	mRNA	1412	43.915	156	154.662
CSG2	mRNA	1232	50.815	156	154.662
DIC1	mRNA	896	38.5	155	153.671
ERG13	mRNA	1475	42.17	155	153.671
MRPS12	mRNA	461	45.61	155	153.671
NMD3	mRNA	1556	38.74	155	153.671
FOL2	mRNA	731	35.7	155	153.671
RCF2	mRNA	674	39	155	153.671
IMG2	mRNA	440	45.54	155	153.671
VMA9	mRNA	223	36.38	155	153.671
DPH5	mRNA	902	45.78	154	152.679
COM2	mRNA	1331	52.595	154	152.679
SIM1	mRNA	1433	49.97	154	152.679
GLR1	mRNA	1451	40.76	154	152.679
RPA34	mRNA	701	41.68	154	152.679
ADE8	mRNA	644	43.07	153	151.688
QCR9	mRNA	201	54.58	153	151.688
NCB2	mRNA	441	36.35	153	151.688
ARC35	mRNA	1028	38.035	152	150.697
HAS1	mRNA	1517	41.99	152	150.697
HEK2	mRNA	1145	36.53	152	150.697
SSP120	mRNA	704	39.485	152	150.697
LSC1	mRNA	989	42.93	152	150.697
SRP54	mRNA	1625	39.075	152	150.697
MRPL50	mRNA	419	42.72	151	149.705
LSM4	mRNA	563	41.85	151	149.705
DLD3	mRNA	1490	41.455	150	148.714
YHM2	mRNA	944	43.71	150	148.714
FAA1	mRNA	2102	50.635	150	148.714
PHB1	mRNA	863	49.205	150	148.714
GPI16	mRNA	1832	41.255	150	148.714
YJU3	mRNA	941	47.715	150	148.714
COX17	mRNA	209	46.77	149	147.722
GRE3	mRNA	983	50.03	149	147.722
DUT1	mRNA	443	41.9	149	147.722
CAP2	mRNA	863	46.44	149	147.722
SDT1	mRNA	842	52.35	149	147.722
MCA1	mRNA	1298	46.86	149	147.722
VPS55	mRNA	422	45.14	149	147.722
PAN5	mRNA	1139	43.21	149	147.722
RPT5	mRNA	1304	43.64	149	147.722
EXP1	mRNA	449	36.32	148	146.731
RPL7A	mRNA	736	35.97	148	146.731
ENA1	mRNA	3275	47.58	148	146.731
NAT5	mRNA	530	50.145	148	146.731
RLP24	mRNA	599	47.33	147	145.739
MRI1	mRNA	1235	38.92	147	145.739
THO1	mRNA	656	43.78	147	145.739
EMC5	mRNA	425	41.79	147	145.739
SEC66	mRNA	620	39.09	147	145.739
GSY2	mRNA	2117	61.35	147	145.739
SEC17	mRNA	879	43.92	147	145.739
MDH1	mRNA	1004	46.88	147	145.739
SDO1	mRNA	752	45.3	147	145.739
ETT1	mRNA	1238	42.05	147	145.739
ARC18	mRNA	536	40.75	147	145.739
SEC21	mRNA	2807	41.79	147	145.739
NPC2	mRNA	521	52.03	146	144.748
SCW11	mRNA	1628	54.825	146	144.748
GNP1	mRNA	1991	40.45	146	144.748
MNN2	mRNA	1793	45.075	146	144.748
VTA1	mRNA	992	36.04	146	144.748
TIF6	mRNA	737	57.785	146	144.748
ERV41	mRNA	1059	41.525	146	144.748
DPL1	mRNA	1769	47.95	146	144.748
SHM1	mRNA	1472	41	145	143.757
MIS1	mRNA	2927	38.94	145	143.757
ADD66	mRNA	803	42.27	145	143.757
VPS24	mRNA	674	43.83	145	143.757
YPR204W	mRNA	3098	51.54	145	143.757
ERD2	mRNA	660	41.655	144	142.765
NSG1	mRNA	875	45.905	144	142.765
VTC4	mRNA	2165	43.95	144	142.765
PSG1	mRNA	1178	45.555	144	142.765
CNB1	mRNA	528	39.835	144	142.765
ATO3	mRNA	827	48.74	144	142.765
LSM12	mRNA	563	39.685	144	142.765
LCB1	mRNA	1676	39.335	144	142.765
ERV29	mRNA	932	48.825	144	142.765
KSH1	mRNA	218	51.615	144	142.765
UBC1	mRNA	647	37.37	143	141.774
PHB2	mRNA	932	47.19	143	141.774
MAE1	mRNA	2009	39.19	143	141.774
DCW1	mRNA	1349	33.85	143	141.774
STE4	mRNA	1271	43.04	143	141.774
ARD1	mRNA	716	43.56	143	141.774
DBP5	mRNA	1448	43.88	143	141.774
PPN2	mRNA	980	48.32	143	141.774
YAR1	mRNA	602	34.65	143	141.774
RPB11	mRNA	362	39.19	143	141.774
RCK2	mRNA	1832	47.075	142	140.782
RPC19	mRNA	428	40.955	142	140.782
GGA2	mRNA	1757	41.38	142	140.782
TED1	mRNA	1421	39.075	142	140.782
RCN2	mRNA	797	56.89	141	139.791
YBL028C	mRNA	320	42.33	141	139.791
FPR2	mRNA	407	43.88	141	139.791
YPQ1	mRNA	926	43.33	141	139.791
TIM50	mRNA	1430	43.79	141	139.791
CUE1	mRNA	611	37.52	141	139.791
TIM13	mRNA	317	41.23	141	139.791
KES1	mRNA	1304	45.75	141	139.791
PDX3	mRNA	686	37.62	141	139.791
COX9	mRNA	179	42.78	141	139.791
KRR1	mRNA	950	42.515	140	138.8
MDM35	mRNA	260	47.74	140	138.8
HAP1	mRNA	4508	46.34	140	138.8
LEU4	mRNA	1859	45.295	140	138.8
TOM40	mRNA	1163	49.15	140	138.8
RBD2	mRNA	788	43.63	139	137.808
SEC72	mRNA	581	45.38	139	137.808
CDC3	mRNA	1562	39.59	139	137.808
IST2	mRNA	2840	42.69	139	137.808
KIN3	mRNA	1307	40.3	139	137.808
HEM2	mRNA	1028	40.89	138	136.817
LYP1	mRNA	1835	44.435	138	136.817
YBT1	mRNA	4985	46.05	138	136.817
LAG1	mRNA	1235	36.275	138	136.817
HSP78	mRNA	2435	49.355	138	136.817
ADE6	mRNA	4076	41.24	138	136.817
COX6	mRNA	446	49.695	138	136.817
ATP20	mRNA	347	39	138	136.817
TAF9	mRNA	473	40.77	138	136.817
NYV1	mRNA	762	50.96	137	135.825
GAS3	mRNA	1574	48.72	137	135.825
MSC7	mRNA	1934	45.18	137	135.825
DEF1	mRNA	2216	39.71	137	135.825
CIC1	mRNA	1130	41.09	137	135.825
STE6	mRNA	3872	46.56	137	135.825
ECT1	mRNA	971	39.71	137	135.825
HEM12	mRNA	1088	46.67	137	135.825
SSO2	mRNA	887	44.815	136	134.834
STP3	mRNA	1031	50.57	136	134.834
PRY1	mRNA	899	53.9	136	134.834
VPS1	mRNA	2114	38.69	136	134.834
PPX1	mRNA	1193	44.155	136	134.834
RAD14	mRNA	1116	44.34	136	134.834
MAP2	mRNA	1265	40.11	136	134.834
FUM1	mRNA	1466	40.43	135	133.842
ICY1	mRNA	383	56	135	133.842
ERG27	mRNA	1043	38.75	135	133.842
SAC1	mRNA	1871	40.61	135	133.842
VTC2	mRNA	2486	43.76	135	133.842
BCP1	mRNA	851	38.88	135	133.842
MUP1	mRNA	1724	52.6	135	133.842
GFA1	mRNA	2153	45.965	134	132.851
SLC1	mRNA	911	41.51	134	132.851
CIT2	mRNA	1382	59.515	134	132.851
CRP1	mRNA	1397	31.865	134	132.851
LSB3	mRNA	1380	43.13	134	132.851
GIM3	mRNA	389	43.145	134	132.851
EMG1	mRNA	758	42.5	133	131.86
TRM112	mRNA	407	38.65	133	131.86
CGR1	mRNA	362	34.22	133	131.86
RPA190	mRNA	4994	46.63	133	131.86
ISU1	mRNA	497	53.21	133	131.86
RPC11	mRNA	332	40.29	133	131.86
RPA135	mRNA	3611	43.72	133	131.86
RSM7	mRNA	743	51.55	133	131.86
DOG2	mRNA	740	46.52	133	131.86
RPA49	mRNA	1247	39.48	133	131.86
NOP2	mRNA	1856	43.695	132	130.868
INP51	mRNA	2840	41.445	132	130.868
OM14	mRNA	405	49.85	132	130.868
UBP6	mRNA	1499	44.6	132	130.868
LYS21	mRNA	1322	42.33	131	129.877
MTC1	mRNA	1436	43.67	131	129.877
MIA40	mRNA	1211	49.56	131	129.877
GRX3	mRNA	752	38.81	131	129.877
YPR1	mRNA	938	41.12	131	129.877
MID2	mRNA	1130	53.92	131	129.877
NUG1	mRNA	1562	40.85	131	129.877
DBP3	mRNA	1571	38.12	131	129.877
CRN1	mRNA	1955	40.44	131	129.877
SEC23	mRNA	2306	49.42	131	129.877
DOT6	mRNA	2012	55.42	131	129.877
PDR16	mRNA	1055	40.665	130	128.885
CCP1	mRNA	1085	43.515	130	128.885
AKR1	mRNA	2294	46.73	130	128.885
ISD11	mRNA	284	45.99	130	128.885
HAL5	mRNA	2567	51.545	130	128.885
AIM41	mRNA	557	43.13	130	128.885
PRM5	mRNA	956	48.995	130	128.885
RPB7	mRNA	515	42.58	130	128.885
COX14	mRNA	212	49.255	130	128.885
FIG2	mRNA	4829	43.775	130	128.885
GCS1	mRNA	1058	41.62	130	128.885
CLU1	mRNA	3833	39.35	129	127.894
THG1	mRNA	713	49.2	129	127.894
LYS20	mRNA	1286	37.82	129	127.894
RPB4	mRNA	665	41.92	129	127.894
ASH1	mRNA	1766	52	129	127.894
EMC3	mRNA	761	43.5	129	127.894
TPA1	mRNA	1934	40	129	127.894
CKB2	mRNA	776	42.48	129	127.894
RNR1	mRNA	2666	50.585	128	126.902
PEX34	mRNA	434	52.495	128	126.902
ANP1	mRNA	1502	39.515	128	126.902
DAD4	mRNA	218	48.74	128	126.902
NIF3	mRNA	866	38.44	128	126.902
APS2	mRNA	443	42.875	128	126.902
MDY2	mRNA	638	47.38	128	126.902
RDI1	mRNA	608	39.08	127	125.911
YBL029C-A	mRNA	284	57.08	127	125.911
RHO5	mRNA	995	40.58	127	125.911
UBC9	mRNA	474	37.74	127	125.911
AAH1	mRNA	1043	44.81	127	125.911
SEC11	mRNA	503	47.37	127	125.911
MRP2	mRNA	347	43.24	127	125.911
STE24	mRNA	1361	44.02	127	125.911
ERG26	mRNA	1049	42.76	126	124.92
COX4	mRNA	480	47.86	126	124.92
COP1	mRNA	3605	37.165	126	124.92
CDC10	mRNA	968	45.1	126	124.92
SEC65	mRNA	821	39.18	126	124.92
EMP47	mRNA	1337	37.765	126	124.92
YPF1	mRNA	1763	56.195	126	124.92
CAJ1	mRNA	1175	39.845	126	124.92
SNF4	mRNA	968	43.505	126	124.92
NEW1	mRNA	3590	45.595	126	124.92
PSE1	mRNA	3269	46.04	125	123.928
APQ12	mRNA	416	50.81	125	123.928
CDC11	mRNA	1247	45.7	125	123.928
NCP1	mRNA	2075	39.19	125	123.928
SNX3	mRNA	488	38.62	125	123.928
XRN1	mRNA	4586	43.79	125	123.928
YBR016W	mRNA	386	53.285	124	122.937
RIB5	mRNA	716	37.6	124	122.937
PTM1	mRNA	1571	48.755	124	122.937
HIS4	mRNA	2399	43.7	124	122.937
HIS3	mRNA	662	40.65	124	122.937
NAT1	mRNA	2564	45.005	124	122.937
HIP1	mRNA	1811	50.385	124	122.937
YPR148C	mRNA	1307	43.955	124	122.937
ERG1	mRNA	1490	39.72	123	121.945
MXR1	mRNA	554	37.8	123	121.945
COR1	mRNA	1373	39.75	123	121.945
TPO4	mRNA	1979	61.24	123	121.945
SUS1	mRNA	292	46.82	123	121.945
YIP4	mRNA	707	46.39	123	121.945
DRE2	mRNA	1046	43.83	123	121.945
TAF14	mRNA	735	43.14	123	121.945
MGR2	mRNA	341	41.48	123	121.945
SCS3	mRNA	1142	45.04	123	121.945
ISU2	mRNA	470	45.96	123	121.945
CPA1	mRNA	1235	52.64	123	121.945
EST3	mRNA	546	52.615	122	120.954
CBC2	mRNA	626	42.8	122	120.954
LAP2	mRNA	2015	49.685	122	120.954
SCD6	mRNA	1049	38.565	122	120.954
DFG5	mRNA	1376	47.425	122	120.954
CKB1	mRNA	836	40.615	122	120.954
SAM2	mRNA	1154	36.735	122	120.954
MLC2	mRNA	491	39.485	122	120.954
CHS5	mRNA	2015	42.675	122	120.954
MRM2	mRNA	962	45.92	122	120.954
TIM9	mRNA	263	44.08	121	119.962
MGM101	mRNA	809	41.75	121	119.962
SOL3	mRNA	749	40.38	121	119.962
GPP2	mRNA	752	55.83	121	119.962
TRP2	mRNA	1523	36.78	121	119.962
SMI1	mRNA	1517	43	121	119.962
MSC1	mRNA	1541	56.56	120	118.971
GLO3	mRNA	1481	46.2	120	118.971
PFD1	mRNA	329	39.505	120	118.971
PPH21	mRNA	1109	44.755	120	118.971
FAU1	mRNA	635	48.87	119	117.98
PET309	mRNA	2897	47.28	119	117.98
SSO1	mRNA	872	43.85	119	117.98
JIP5	mRNA	1478	39.52	119	117.98
CDC37	mRNA	1520	40.58	119	117.98
SVP26	mRNA	686	47.61	119	117.98
YCK1	mRNA	1616	43.46	119	117.98
RNH70	mRNA	1661	43.8	119	117.98
CPR2	mRNA	617	45.375	118	116.988
HHO1	mRNA	776	40.44	118	116.988
AIP1	mRNA	1847	43.895	118	116.988
CUZ1	mRNA	824	35	118	116.988
PBP1	mRNA	2168	44.42	118	116.988
CHS1	mRNA	3395	51.69	118	116.988
KAP123	mRNA	3341	42.91	118	116.988
YDL012C	mRNA	324	49.105	118	116.988
ADE1	mRNA	920	41.54	117	115.997
DBP9	mRNA	1784	42.11	117	115.997
RAD23	mRNA	1196	42.56	117	115.997
RPF2	mRNA	1034	39.59	117	115.997
EMC6	mRNA	326	49.3	117	115.997
PIN3	mRNA	647	60.41	117	115.997
VPS21	mRNA	632	45.105	116	115.005
RLI1	mRNA	1826	43.695	116	115.005
MIR1	mRNA	935	46.905	116	115.005
MCM1	mRNA	860	49.425	116	115.005
TPD3	mRNA	1907	45.625	116	115.005
POM33	mRNA	839	50.665	116	115.005
ILM1	mRNA	611	40.605	116	115.005
LSM3	mRNA	269	33.175	116	115.005
RCR1	mRNA	641	56.095	116	115.005
HRR25	mRNA	1484	43.985	116	115.005
ENV9	mRNA	992	41.48	116	115.005
OST4	mRNA	110	47.44	115	114.014
GID8	mRNA	1367	52.7	115	114.014
YBR056W	mRNA	1505	51.77	115	114.014
RAM2	mRNA	950	43.31	115	114.014
RSM19	mRNA	275	43.08	115	114.014
RPB2	mRNA	3674	46.92	115	114.014
SEC26	mRNA	2921	40.82	115	114.014
END3	mRNA	1049	46.37	114	113.022
PAM17	mRNA	593	49.55	114	113.022
STE18	mRNA	332	38.15	114	113.022
TVP23	mRNA	599	39.94	114	113.022
DTD1	mRNA	453	41.38	114	113.022
ALD4	mRNA	1559	50.405	114	113.022
EMC2	mRNA	878	46.08	114	113.022
YRB2	mRNA	983	33.15	114	113.022
MDH2	mRNA	1133	61.605	114	113.022
TOM20	mRNA	551	41.845	114	113.022
SFK1	mRNA	1061	53.92	113	112.031
RET2	mRNA	1640	37.95	113	112.031
HAM1	mRNA	593	48.84	113	112.031
DIM1	mRNA	956	40.17	113	112.031
MRP7	mRNA	1115	44.74	113	112.031
EMP70	mRNA	2003	46.88	113	112.031
YNL134C	mRNA	1130	43.45	113	112.031
PHO8	mRNA	1700	44.175	112	111.04
ZRT2	mRNA	1268	47.375	112	111.04
GCD7	mRNA	1145	42.745	112	111.04
NTH1	mRNA	2255	54.89	112	111.04
ALO1	mRNA	1580	41.65	112	111.04
GAD1	mRNA	1757	60.765	112	111.04
PML39	mRNA	1004	43.985	112	111.04
YPD1	mRNA	503	39.65	112	111.04
MRX14	mRNA	317	46.17	111	110.048
RPB9	mRNA	368	45.19	111	110.048
TCB2	mRNA	3536	44.76	111	110.048
PLN1	mRNA	851	45.43	111	110.048
GIR2	mRNA	797	40.04	111	110.048
ARO3	mRNA	1112	45.33	111	110.048
RPA12	mRNA	377	35.83	111	110.048
YIP1	mRNA	746	41.42	111	110.048
CNL1	mRNA	368	42.52	111	110.048
DAP2	mRNA	2456	43.21	111	110.048
RKI1	mRNA	776	38.52	111	110.048
CWH41	mRNA	2501	39.53	110	109.057
KRE29	mRNA	1394	54.295	110	109.057
GAS2	mRNA	1667	50.34	110	109.057
COS6	mRNA	1145	45.585	110	109.057
MRPL39	mRNA	212	42.32	109	108.065
DYN2	mRNA	280	34.88	109	108.065
MNN5	mRNA	1760	45.27	109	108.065
RPB3	mRNA	956	34.35	109	108.065
ABP1	mRNA	1778	40.2	109	108.065
YNL190W	mRNA	614	58	109	108.065
QCR6	mRNA	443	41.61	109	108.065
DAD1	mRNA	284	51.2	109	108.065
SQT1	mRNA	1295	31.29	109	108.065
ALE1	mRNA	1859	40.84	109	108.065
QCR2	mRNA	1106	43.58	109	108.065
BOS1	mRNA	735	43	109	108.065
IPT1	mRNA	1583	60.66	109	108.065
RPA43	mRNA	980	36.48	109	108.065
LSO2	mRNA	278	43.515	108	107.074
BCY1	mRNA	1250	51.06	108	107.074
UBC6	mRNA	752	41.575	108	107.074
YGR054W	mRNA	1928	49.35	108	107.074
MDE1	mRNA	734	42.85	108	107.074
SRP72	mRNA	1922	45.405	108	107.074
GRH1	mRNA	1118	52.955	108	107.074
HMT1	mRNA	1046	46.41	108	107.074
PDX1	mRNA	1232	46.055	108	107.074
SEC24	mRNA	2780	46.525	108	107.074
KTR6	mRNA	1340	44.86	107	106.082
TOM71	mRNA	1919	43.27	107	106.082
RBG1	mRNA	1109	33.85	107	106.082
SPF1	mRNA	3647	50.58	107	106.082
MKT1	mRNA	2492	40.3	107	106.082
NSP1	mRNA	2472	45.7	107	106.082
CKA2	mRNA	1019	43.73	107	106.082
TYW1	mRNA	2432	39.76	107	106.082
SHE10	mRNA	1733	41.005	106	105.091
MIT1	mRNA	2000	53.55	106	105.091
SNQ2	mRNA	4505	43.2	106	105.091
YPS7	mRNA	1790	47	106	105.091
TCB1	mRNA	3560	46.585	106	105.091
PLB3	mRNA	2060	51.375	106	105.091
PNO1	mRNA	824	39.385	106	105.091
APL2	mRNA	2180	46.9	106	105.091
RRP7	mRNA	893	43.63	106	105.091
YIP5	mRNA	932	50.63	106	105.091
ESS1	mRNA	512	40.01	106	105.091
UBC13	mRNA	462	35.745	106	105.091
MKC7	mRNA	1790	36.405	106	105.091
DAP1	mRNA	458	47.575	106	105.091
COA2	mRNA	206	46.69	105	104.1
MXR2	mRNA	506	45.17	105	104.1
MTR2	mRNA	568	41.81	105	104.1
RIE1	mRNA	2345	55.17	105	104.1
ARO9	mRNA	1541	54.28	105	104.1
SFB3	mRNA	2789	45.96	105	104.1
TFS1	mRNA	659	54.8	105	104.1
YIF1	mRNA	944	47	105	104.1
NNT1	mRNA	785	39.09	105	104.1
SEC22	mRNA	644	41.75	105	104.1
BUD20	mRNA	500	39.735	104	103.108
PCM1	mRNA	1673	38.345	104	103.108
RNQ1	mRNA	1217	41.75	104	103.108
YAK1	mRNA	2423	58.77	104	103.108
FCF1	mRNA	569	47.66	104	103.108
RBL2	mRNA	320	34.77	104	103.108
ADP1	mRNA	3149	47.19	104	103.108
LEU9	mRNA	1814	41.965	104	103.108
GIM5	mRNA	492	37.69	104	103.108
MRPL51	mRNA	422	40.875	104	103.108
MPC1	mRNA	392	50.215	104	103.108
SRM1	mRNA	1448	35.06	104	103.108
RVB2	mRNA	1415	43.925	104	103.108
NOP6	mRNA	677	33.12	103	102.117
DAK1	mRNA	1754	41.89	103	102.117
UTR4	mRNA	683	39.48	103	102.117
ENT2	mRNA	1841	38.9	103	102.117
PKR1	mRNA	368	45.22	103	102.117
ERG28	mRNA	446	46.32	103	102.117
YPT6	mRNA	647	38.34	103	102.117
PER33	mRNA	821	50.1	103	102.117
TRM82	mRNA	1334	39.21	103	102.117
CBS1	mRNA	689	48.09	103	102.117
BDH1	mRNA	1148	45.19	103	102.117
SRP68	mRNA	1799	50.64	103	102.117
BDF2	mRNA	1916	55.15	103	102.117
RSA3	mRNA	662	41.75	103	102.117
YNR061C	mRNA	659	45.13	103	102.117
CHS7	mRNA	950	49.42	103	102.117
PMU1	mRNA	887	42.67	103	102.117
ROQ1	mRNA	314	57.68	103	102.117
AVT1	mRNA	1808	41.16	102	101.125
SNL1	mRNA	479	39.455	102	101.125
DPP1	mRNA	869	41.875	102	101.125
GET2	mRNA	857	42.315	102	101.125
KRE6	mRNA	2162	52.22	102	101.125
YMR027W	mRNA	1412	41.935	102	101.125
CDC12	mRNA	1223	40.5	102	101.125
VCX1	mRNA	1235	50.36	102	101.125
MDJ1	mRNA	1535	50.675	102	101.125
GCN20	mRNA	2258	46.175	102	101.125
LAC1	mRNA	1256	47.785	102	101.125
LRP1	mRNA	554	40.85	102	101.125
ABP140	mRNA	1887	41.55	101	100.134
FPY1	mRNA	824	43.74	101	100.134
BRE1	mRNA	2102	43.93	101	100.134
RBG2	mRNA	1106	42.52	101	100.134
MRPL13	mRNA	794	43.96	101	100.134
ENB1	mRNA	1820	48.59	101	100.134
SEH1	mRNA	1049	39.78	101	100.134
AIM7	mRNA	449	46.76	101	100.134
FIT3	mRNA	614	41.79	101	100.134
SRP102	mRNA	734	40.92	101	100.134
SPC2	mRNA	536	39.64	101	100.134
MRPL9	mRNA	809	44.62	101	100.134
MRPL31	mRNA	395	44.75	100	99.1425
ERG12	mRNA	1331	37.725	100	99.1425
RIP1	mRNA	647	45.76	100	99.1425
RRT8	mRNA	1029	48.645	100	99.1425
GNT1	mRNA	1475	40.795	100	99.1425
YPT52	mRNA	704	42.245	100	99.1425
PRX1	mRNA	785	45.925	100	99.1425
NPA3	mRNA	1157	38.42	100	99.1425
MYO2	mRNA	4724	36.33	100	99.1425
MYO4	mRNA	4415	51.445	100	99.1425
CUB1	mRNA	1655	48	99	98.1511
PAM16	mRNA	449	37	99	98.1511
MRPL23	mRNA	491	48.7	99	98.1511
TPO5	mRNA	1856	45.83	99	98.1511
MRP10	mRNA	287	48.79	99	98.1511
RAD33	mRNA	533	41.87	99	98.1511
AME1	mRNA	974	48.29	99	98.1511
PMC1	mRNA	3521	56	99	98.1511
FLC1	mRNA	2381	56.87	99	98.1511
NOP13	mRNA	1211	38.79	99	98.1511
PRP42	mRNA	1634	48.22	99	98.1511
CWH43	mRNA	2861	44	99	98.1511
ACL4	mRNA	1163	38.305	98	97.1597
TSC11	mRNA	4292	48.275	98	97.1597
PAM18	mRNA	506	44.37	98	97.1597
PRP38	mRNA	728	45.945	98	97.1597
CBP6	mRNA	488	49.68	98	97.1597
CIR1	mRNA	785	42.345	98	97.1597
FRQ1	mRNA	572	36.31	98	97.1597
RRP1	mRNA	836	38.97	98	97.1597
YTM1	mRNA	1382	42.05	98	97.1597
UBP16	mRNA	1499	50.615	98	97.1597
UTP30	mRNA	824	36.77	98	97.1597
GLO2	mRNA	824	42.41	97	96.1682
RHO3	mRNA	695	36.78	97	96.1682
SLA1	mRNA	3734	46.58	97	96.1682
HEM13	mRNA	986	49.92	97	96.1682
BCS1	mRNA	1370	48.56	97	96.1682
LDB7	mRNA	542	48.8	97	96.1682
AIM6	mRNA	1172	45.97	97	96.1682
HMRA2	mRNA	359	46.56	97	96.1682
APE2	mRNA	2859	46.64	97	96.1682
NUP2	mRNA	2162	41.36	97	96.1682
RAD6	mRNA	518	37.13	97	96.1682
REH1	mRNA	1298	50.68	97	96.1682
PPN1	mRNA	2024	42.19	97	96.1682
NOP16	mRNA	695	38.73	97	96.1682
DST1	mRNA	929	38.6	97	96.1682
ELF1	mRNA	437	34.5	97	96.1682
ARX1	mRNA	1781	36.255	96	95.1768
EDC3	mRNA	1655	44.1	96	95.1768
CPR8	mRNA	926	49.65	96	95.1768
SYH1	mRNA	2549	50.9	96	95.1768
PRS5	mRNA	1490	49.575	96	95.1768
HIS5	mRNA	1157	43.42	96	95.1768
GPI15	mRNA	690	53.86	96	95.1768
EFM5	mRNA	748	31.295	96	95.1768
MNN11	mRNA	1268	40.31	96	95.1768
MAK31	mRNA	266	37.1	95	94.1854
TFG1	mRNA	2207	44.39	95	94.1854
SAM35	mRNA	989	45	95	94.1854
TRM1	mRNA	1712	33.95	95	94.1854
KGD2	mRNA	1391	41	95	94.1854
YER134C	mRNA	536	48.89	95	94.1854
CAB5	mRNA	725	50.79	95	94.1854
GRX7	mRNA	611	41.64	95	94.1854
RSN1	mRNA	2861	53.33	95	94.1854
POP8	mRNA	402	35.87	95	94.1854
TIM21	mRNA	719	42.54	95	94.1854
OPI3	mRNA	620	44.05	95	94.1854
SEC18	mRNA	2276	42.52	95	94.1854
URE2	mRNA	1064	38.48	95	94.1854
APS1	mRNA	470	37.42	95	94.1854
PKH2	mRNA	3245	51.5	95	94.1854
SFH5	mRNA	884	41.87	95	94.1854
EHT1	mRNA	1355	49.74	95	94.1854
PGC1	mRNA	965	47.36	95	94.1854
YGR130C	mRNA	2450	56.41	95	94.1854
GCD1	mRNA	1736	41	95	94.1854
LOC1	mRNA	614	35.37	95	94.1854
STO1	mRNA	2586	49.09	95	94.1854
DID2	mRNA	614	37.65	94	93.194
MRPL37	mRNA	317	45.845	94	93.194
ATX1	mRNA	221	37.865	94	93.194
NIP1	mRNA	2438	52.765	94	93.194
YFH1	mRNA	524	42.605	94	93.194
YPK1	mRNA	2042	48.825	94	93.194
SPO12	mRNA	521	42.06	94	93.194
SPT5	mRNA	3191	38.33	94	93.194
FMP52	mRNA	695	53.79	94	93.194
BDF1	mRNA	2060	47.815	94	93.194
IGO2	mRNA	395	48.905	94	93.194
SRP101	mRNA	1865	43.56	94	93.194
BXI1	mRNA	893	55.85	93	92.2025
OST6	mRNA	998	40.27	93	92.2025
GCD6	mRNA	2138	41.12	93	92.2025
CSM1	mRNA	572	38.84	93	92.2025
PEP1	mRNA	4739	48.46	93	92.2025
NCL1	mRNA	2054	42.42	93	92.2025
MMS2	mRNA	414	36.4	93	92.2025
NMT1	mRNA	1367	45.39	93	92.2025
VRG4	mRNA	1013	54.09	93	92.2025
SLG1	mRNA	1136	46.62	93	92.2025
DGK1	mRNA	872	45.85	93	92.2025
PUS7	mRNA	2030	41.67	93	92.2025
GCN3	mRNA	917	43.64	93	92.2025
PCL5	mRNA	689	52.87	93	92.2025
SER33	mRNA	1409	44.58	93	92.2025
SIC1	mRNA	854	52.32	93	92.2025
LYS9	mRNA	1340	37.36	93	92.2025
CUE5	mRNA	1235	46.24	93	92.2025
KAP104	mRNA	2756	44.41	93	92.2025
KEI1	mRNA	666	40.54	93	92.2025
DIG1	mRNA	1358	48.265	92	91.2111
YKE2	mRNA	344	34.095	92	91.2111
RFA2	mRNA	822	42.375	92	91.2111
NSA2	mRNA	785	43.47	92	91.2111
HRB1	mRNA	1365	42.335	92	91.2111
APL5	mRNA	2798	46.065	92	91.2111
GRX5	mRNA	452	43.845	92	91.2111
MVD1	mRNA	1190	44.77	92	91.2111
SCJ1	mRNA	1133	34.35	92	91.2111
PAN6	mRNA	929	48.245	92	91.2111
REE1	mRNA	596	43.03	92	91.2111
URA7	mRNA	1739	41.675	92	91.2111
DCP2	mRNA	2912	46.96	92	91.2111
CSE1	mRNA	2882	51.055	92	91.2111
RSC30	mRNA	2651	47.06	92	91.2111
EIS1	mRNA	2531	51.36	91	90.2197
MIC27	mRNA	704	50	91	90.2197
MRPL6	mRNA	644	48.07	91	90.2197
HUB1	mRNA	221	40.57	91	90.2197
AIM45	mRNA	1034	44.14	91	90.2197
DSE3	mRNA	1292	58.5	91	90.2197
CPT1	mRNA	1182	41.57	91	90.2197
LOA1	mRNA	902	37.83	91	90.2197
QDR2	mRNA	1628	54.04	91	90.2197
MED11	mRNA	395	39.54	91	90.2197
TOA2	mRNA	368	48.715	90	89.2283
NUP57	mRNA	1625	43.265	90	89.2283
SNF11	mRNA	509	59.81	90	89.2283
PEX2	mRNA	815	57.585	90	89.2283
RSM18	mRNA	416	45.27	90	89.2283
GLC3	mRNA	2114	68.88	90	89.2283
BNA6	mRNA	887	42.405	90	89.2283
PAL2	mRNA	1101	56.955	90	89.2283
TOH1	mRNA	1190	71.935	90	89.2283
SER2	mRNA	929	47.335	90	89.2283
TRP1	mRNA	674	39.295	90	89.2283
ALG5	mRNA	1004	40.91	90	89.2283
ATP11	mRNA	956	48.48	89	88.2368
ERG8	mRNA	1355	41.04	89	88.2368
MRPL33	mRNA	260	46.31	89	88.2368
GPI17	mRNA	1604	42.8	89	88.2368
BRE4	mRNA	3377	50.5	89	88.2368
TVP15	mRNA	431	47.37	89	88.2368
PWP1	mRNA	1730	35.37	89	88.2368
YOR342C	mRNA	959	49.67	89	88.2368
CYT1	mRNA	929	52.37	89	88.2368
MRPL38	mRNA	416	42.415	88	87.2454
MIM2	mRNA	263	39.45	88	87.2454
RRP5	mRNA	5189	42.515	88	87.2454
YAH1	mRNA	518	43.23	88	87.2454
HOT13	mRNA	350	43.075	88	87.2454
GOT1	mRNA	417	45.05	88	87.2454
MRPL49	mRNA	485	45.2	88	87.2454
COA1	mRNA	593	48.33	88	87.2454
RPL4A	mRNA	1088	41.775	88	87.2454
MIM1	mRNA	341	39.88	88	87.2454
FIT2	mRNA	461	39.96	88	87.2454
SPN1	mRNA	1232	44.28	88	87.2454
TAF10	mRNA	620	41	88	87.2454
IMG1	mRNA	509	39.875	88	87.2454
PTC2	mRNA	1394	46.485	88	87.2454
TRP3	mRNA	1454	42.89	87	86.254
TAE1	mRNA	698	38.11	87	86.254
PYC2	mRNA	3542	43	87	86.254
SDH2	mRNA	800	58.7	87	86.254
PUF6	mRNA	1970	43.23	87	86.254
PEP12	mRNA	866	58.28	87	86.254
NAN1	mRNA	2690	47.94	87	86.254
ERP5	mRNA	638	42.17	87	86.254
NPP2	mRNA	1481	51.76	87	86.254
TRS33	mRNA	806	39.7	87	86.254
CTR1	mRNA	1220	45.42	87	86.254
PGM1	mRNA	1712	41	87	86.254
NAB6	mRNA	3404	56.29	87	86.254
BET1	mRNA	429	43.18	87	86.254
AIM9	mRNA	1883	40.52	87	86.254
DOP1	mRNA	5096	44.27	87	86.254
MRPS16	mRNA	365	36.85	87	86.254
CMS1	mRNA	875	39	87	86.254
FLC2	mRNA	2351	50.165	86	85.2626
AVT7	mRNA	1472	42.945	86	85.2626
SSA4	mRNA	1928	41.005	86	85.2626
PRM4	mRNA	854	50.02	86	85.2626
YPS1	mRNA	1709	65.575	86	85.2626
HMX1	mRNA	953	48.18	86	85.2626
VPS25	mRNA	608	48.43	86	85.2626
YPI1	mRNA	467	38.37	86	85.2626
MPD2	mRNA	833	48.235	86	85.2626
YPK2	mRNA	2033	55.93	86	85.2626
COA3	mRNA	257	47.525	86	85.2626
POL5	mRNA	3068	42.665	86	85.2626
ROX3	mRNA	662	45.03	86	85.2626
RFC5	mRNA	1064	45.265	86	85.2626
MTQ1	mRNA	944	43.905	86	85.2626
TIM44	mRNA	1295	47.48	86	85.2626
YBR137W	mRNA	539	38.72	86	85.2626
NOT5	mRNA	1682	49.31	86	85.2626
ALG6	mRNA	1634	49	86	85.2626
YBL036C	mRNA	773	44.61	85	84.2711
OSW7	mRNA	1532	44.15	85	84.2711
PRO1	mRNA	1286	42.39	85	84.2711
MRPL22	mRNA	929	48.44	85	84.2711
TMA17	mRNA	452	51	85	84.2711
KAE1	mRNA	1160	43.54	85	84.2711
YCF1	mRNA	4547	41.83	85	84.2711
GUP1	mRNA	1682	46.56	85	84.2711
NOC2	mRNA	2132	39.78	85	84.2711
RTS1	mRNA	2273	51.85	85	84.2711
ARP4	mRNA	1469	42.21	85	84.2711
ALG2	mRNA	1511	43.45	85	84.2711
MET12	mRNA	1973	45.38	85	84.2711
BER1	mRNA	824	51.18	85	84.2711
DID4	mRNA	699	42.525	84	83.2797
PLB1	mRNA	1994	54.115	84	83.2797
RPN9	mRNA	1181	38.67	84	83.2797
SUB1	mRNA	878	45.155	84	83.2797
KRE28	mRNA	1157	50.33	84	83.2797
RRS1	mRNA	611	33.62	84	83.2797
SUR1	mRNA	1148	60.025	84	83.2797
MHF2	mRNA	242	43.86	84	83.2797
ADE2	mRNA	1715	44.815	84	83.2797
GTR1	mRNA	932	42.915	84	83.2797
PAM1	mRNA	2492	52.24	84	83.2797
ARO7	mRNA	770	38.355	84	83.2797
YPS3	mRNA	1526	46.325	84	83.2797
TUM1	mRNA	914	36.635	84	83.2797
ENT3	mRNA	1226	46.025	84	83.2797
EXG2	mRNA	1688	46.71	84	83.2797
PHO91	mRNA	2684	45.1	84	83.2797
HOM3	mRNA	1583	46.75	84	83.2797
CYB5	mRNA	362	39.435	84	83.2797
NPL6	mRNA	1307	38.325	84	83.2797
UTP20	mRNA	7481	52	83	82.2883
CWC25	mRNA	539	42.76	83	82.2883
TMA46	mRNA	1037	39.15	83	82.2883
BET3	mRNA	581	52.41	83	82.2883
SDS24	mRNA	1583	55.73	83	82.2883
BCH1	mRNA	2174	46.43	83	82.2883
SDH4	mRNA	545	56.52	83	82.2883
LAP3	mRNA	1364	39	83	82.2883
MTD1	mRNA	962	46.7	83	82.2883
NOP12	mRNA	1379	35.91	83	82.2883
MTR4	mRNA	3221	44	83	82.2883
TFB5	mRNA	218	44.54	83	82.2883
TSR2	mRNA	617	40.12	83	82.2883
MRPS18	mRNA	653	40.76	83	82.2883
UGA1	mRNA	1415	56.46	83	82.2883
MPP10	mRNA	1781	41.09	83	82.2883
RDL2	mRNA	449	44.58	83	82.2883
FAP7	mRNA	593	39.12	83	82.2883
SSE2	mRNA	2081	55.44	83	82.2883
RRP42	mRNA	797	45.88	83	82.2883
ERV1	mRNA	570	37.79	83	82.2883
ITR2	mRNA	1829	46.115	82	81.2969
SOL4	mRNA	767	53.215	82	81.2969
DRS1	mRNA	2258	39.965	82	81.2969
MRPL10	mRNA	968	48.35	82	81.2969
ELP2	mRNA	2366	34.145	82	81.2969
SLA2	mRNA	2906	43.17	82	81.2969
NUP49	mRNA	1418	41.43	82	81.2969
EFT2	mRNA	2528	48.085	82	81.2969
ARI1	mRNA	1043	47.74	82	81.2969
GFD1	mRNA	566	45.035	82	81.2969
MIC19	mRNA	512	39.58	82	81.2969
APL6	mRNA	2429	49.59	82	81.2969
AIM25	mRNA	983	49.5	82	81.2969
TLG1	mRNA	674	48.14	82	81.2969
HIS7	mRNA	1658	42.345	82	81.2969
MRP17	mRNA	395	50.345	82	81.2969
PMS1	mRNA	2621	46.51	82	81.2969
OSM1	mRNA	1505	46.725	82	81.2969
ERC1	mRNA	1745	46.775	82	81.2969
PHO85	mRNA	918	44.325	82	81.2969
HST2	mRNA	1073	53.655	82	81.2969
ALT1	mRNA	1778	50.29	82	81.2969
EAF3	mRNA	1205	43.585	82	81.2969
UTP9	mRNA	1727	45.395	82	81.2969
IZH2	mRNA	953	41.13	81	80.3054
SNA4	mRNA	422	58.74	81	80.3054
NDI1	mRNA	1541	57.56	81	80.3054
RHO2	mRNA	578	39.16	81	80.3054
COS5	mRNA	1151	58.23	81	80.3054
AGA1	mRNA	2177	42.38	81	80.3054
ADE4	mRNA	1532	40.73	81	80.3054
ERP4	mRNA	623	50.4	81	80.3054
SPT6	mRNA	4355	45.37	81	80.3054
HLJ1	mRNA	674	50.54	81	80.3054
SFA1	mRNA	1160	40.96	81	80.3054
CTR2	mRNA	569	42.3	81	80.3054
MRS6	mRNA	1811	45.94	81	80.3054
SXM1	mRNA	2834	39.85	81	80.3054
NST1	mRNA	3722	49.25	81	80.3054
TSR4	mRNA	1226	39.92	81	80.3054
CST26	mRNA	1193	45.91	81	80.3054
SPT4	mRNA	308	51.24	81	80.3054
VMA22	mRNA	545	37.525	80	79.314
GGC1	mRNA	902	42.385	80	79.314
SKI6	mRNA	740	39.735	80	79.314
ENT1	mRNA	1364	40.665	80	79.314
DFM1	mRNA	1025	48.67	80	79.314
MRPL17	mRNA	845	49.585	80	79.314
FRD1	mRNA	1412	44.605	80	79.314
PEX21	mRNA	866	41.35	80	79.314
RNA14	mRNA	2033	46.09	80	79.314
RNH203	mRNA	332	34.38	80	79.314
WHI2	mRNA	1460	48.405	80	79.314
EMI1	mRNA	563	45.04	80	79.314
TRM8	mRNA	860	35.45	80	79.314
RPC34	mRNA	953	38.81	80	79.314
CRM1	mRNA	3254	47.45	80	79.314
NOB1	mRNA	1379	41.845	80	79.314
CDC1	mRNA	1475	49.325	80	79.314
NVJ2	mRNA	2312	44.03	80	79.314
ALG7	mRNA	1346	44.73	80	79.314
TUP1	mRNA	2141	44.4	80	79.314
CKA1	mRNA	1118	41.215	80	79.314
IES6	mRNA	500	45.35	80	79.314
CYC1	mRNA	329	41.245	80	79.314
RME1	mRNA	902	48.73	80	79.314
TAF6	mRNA	1550	49.385	80	79.314
SEC39	mRNA	2129	48.74	79	78.3226
WSC2	mRNA	1511	39.04	79	78.3226
MSS116	mRNA	1994	45.71	79	78.3226
NCE101	mRNA	162	38.74	79	78.3226
GPA2	mRNA	1349	55.5	79	78.3226
MRPL20	mRNA	587	47.37	79	78.3226
VPS70	mRNA	2435	44.64	79	78.3226
ERP6	mRNA	650	45.72	79	78.3226
SAS10	mRNA	1832	38.32	79	78.3226
PPE1	mRNA	1202	43.88	79	78.3226
DMA1	mRNA	1250	45.71	79	78.3226
TYR1	mRNA	1358	49.82	79	78.3226
PRS2	mRNA	956	44.77	79	78.3226
ETR1	mRNA	1142	45.69	79	78.3226
SMX3	mRNA	260	45.08	79	78.3226
GAL83	mRNA	1253	51.15	79	78.3226
GYP7	mRNA	2240	56.04	79	78.3226
VAN1	mRNA	1607	47.58	79	78.3226
UBX2	mRNA	1754	45.56	79	78.3226
RFC1	mRNA	2585	39.96	79	78.3226
UTP4	mRNA	2330	44.55	79	78.3226
OPI10	mRNA	740	49.74	79	78.3226
AIM20	mRNA	614	34.94	78	77.3312
SPT15	mRNA	722	45.72	78	77.3312
INH1	mRNA	257	58.52	78	77.3312
ERB1	mRNA	2423	46.645	78	77.3312
CDC73	mRNA	1181	49.86	78	77.3312
VPS60	mRNA	689	38.685	78	77.3312
SAP30	mRNA	605	47.895	78	77.3312
PTK2	mRNA	2456	45.04	78	77.3312
PRP43	mRNA	2303	37.335	78	77.3312
GLC8	mRNA	689	39.74	78	77.3312
GTS1	mRNA	1190	43.77	78	77.3312
HEM15	mRNA	1181	48.31	78	77.3312
GYP6	mRNA	1376	47.91	78	77.3312
MRPL44	mRNA	297	43.905	78	77.3312
BET5	mRNA	479	43.04	78	77.3312
SDA1	mRNA	2303	39.845	78	77.3312
CUE4	mRNA	353	36.595	78	77.3312
PLP2	mRNA	860	40.18	78	77.3312
EFR3	mRNA	2348	46.625	78	77.3312
YKR018C	mRNA	2177	47.675	78	77.3312
SBE22	mRNA	2558	49.76	78	77.3312
GSH1	mRNA	2036	54.145	78	77.3312
HRK1	mRNA	2279	54.225	78	77.3312
UTP8	mRNA	2141	40.975	78	77.3312
TSC10	mRNA	962	41.9	77	76.3397
DSD1	mRNA	1286	62.11	77	76.3397
EAR1	mRNA	1652	52.12	77	76.3397
MAG1	mRNA	890	59.76	77	76.3397
SDH8	mRNA	416	48.96	77	76.3397
RSC9	mRNA	1745	46.17	77	76.3397
MEU1	mRNA	1013	35.18	77	76.3397
SRD1	mRNA	665	55.93	77	76.3397
RTT10	mRNA	3041	51.83	77	76.3397
RCH1	mRNA	1304	53	77	76.3397
FRA1	mRNA	2249	45.35	77	76.3397
RPA14	mRNA	413	49.72	77	76.3397
NUS1	mRNA	1127	44.93	77	76.3397
COX5A	mRNA	461	43.43	77	76.3397
RPS6B	mRNA	711	42.26	77	76.3397
PTR2	mRNA	1805	60.92	77	76.3397
SOL2	mRNA	947	44.91	76	75.3483
RPL15B	mRNA	614	44.425	76	75.3483
DPH2	mRNA	1604	40.84	76	75.3483
NSG2	mRNA	899	50.465	76	75.3483
TPN1	mRNA	1739	52.59	76	75.3483
DNF2	mRNA	4838	46.77	76	75.3483
SRB7	mRNA	422	48.76	76	75.3483
OCA1	mRNA	716	38.22	76	75.3483
APM4	mRNA	1475	49.34	76	75.3483
PXR1	mRNA	815	35.365	76	75.3483
GDS1	mRNA	1568	41.94	76	75.3483
MAK11	mRNA	1406	39.665	76	75.3483
STF1	mRNA	260	53.775	76	75.3483
RAS1	mRNA	929	46.895	76	75.3483
RRP46	mRNA	671	40.93	76	75.3483
HSP26	mRNA	644	59.22	76	75.3483
AGE1	mRNA	1448	46.545	76	75.3483
COT1	mRNA	1319	44.86	76	75.3483
SIT1	mRNA	1886	39.04	76	75.3483
STS1	mRNA	959	50.29	76	75.3483
MET14	mRNA	608	46.69	76	75.3483
RFC3	mRNA	1022	39.705	76	75.3483
MCM21	mRNA	1107	59.015	76	75.3483
SPP2	mRNA	557	43.6	75	74.3569
DLD2	mRNA	1592	41.15	75	74.3569
SFT2	mRNA	647	46.68	75	74.3569
DIB1	mRNA	431	45.31	75	74.3569
YPT32	mRNA	668	41.33	75	74.3569
VPH2	mRNA	647	42.36	75	74.3569
APM3	mRNA	1451	47.41	75	74.3569
GPA1	mRNA	1418	39.67	75	74.3569
COQ9	mRNA	782	46.25	75	74.3569
YJR096W	mRNA	848	54.07	75	74.3569
MNT2	mRNA	1676	47.07	75	74.3569
APS3	mRNA	585	49.54	75	74.3569
SIT4	mRNA	935	48.52	75	74.3569
YGL242C	mRNA	545	35.5	75	74.3569
BIM1	mRNA	1034	54.25	75	74.3569
SPL2	mRNA	446	46.55	75	74.3569
RSM10	mRNA	611	57.14	75	74.3569
RRP43	mRNA	1184	45.63	75	74.3569
EDC2	mRNA	437	61.69	74	73.3655
CSS1	mRNA	2987	57.65	74	73.3655
UTP10	mRNA	5309	48.785	74	73.3655
IES4	mRNA	350	40.73	74	73.3655
MRPL8	mRNA	716	44	74	73.3655
NAM7	mRNA	2915	52.78	74	73.3655
MRPS9	mRNA	836	43.135	74	73.3655
GAL80	mRNA	1307	47.27	74	73.3655
TGL4	mRNA	2732	54.215	74	73.3655
SSM4	mRNA	3959	43.985	74	73.3655
TSA2	mRNA	590	54.495	74	73.3655
TIM54	mRNA	1436	41.03	74	73.3655
ASI2	mRNA	869	51.985	74	73.3655
TOA1	mRNA	860	42.32	74	73.3655
TPT1	mRNA	692	37.665	74	73.3655
PNP1	mRNA	935	40.515	74	73.3655
OPT1	mRNA	2399	52.12	74	73.3655
SMY2	mRNA	2222	47.07	74	73.3655
GCR1	mRNA	2358	47.905	74	73.3655
NOP14	mRNA	2432	40.385	74	73.3655
PRS4	mRNA	980	42.245	74	73.3655
IGD1	mRNA	587	53.565	74	73.3655
MRP51	mRNA	1034	45.005	74	73.3655
RQC2	mRNA	3116	41.04	73	72.374
STP1	mRNA	1559	48.12	73	72.374
PDE1	mRNA	1109	55	73	72.374
SCP1	mRNA	602	43.35	73	72.374
TPS3	mRNA	3164	58.43	73	72.374
GCD2	mRNA	1955	39.04	73	72.374
MNN1	mRNA	2288	49.43	73	72.374
SUN4	mRNA	1275	48.36	73	72.374
SHP1	mRNA	1271	41.24	73	72.374
YNL122C	mRNA	347	49.75	73	72.374
YGK1	mRNA	647	41.82	73	72.374
CLN2	mRNA	1637	44.25	73	72.374
YRA2	mRNA	611	39.69	73	72.374
FDC1	mRNA	1511	42.46	73	72.374
EBP2	mRNA	1283	34.62	73	72.374
PHO81	mRNA	3536	44.54	73	72.374
HOL1	mRNA	1760	51.83	73	72.374
TMH18	mRNA	486	47.18	73	72.374
NRG2	mRNA	662	55.37	73	72.374
CYC8	mRNA	2900	52.24	73	72.374
ERJ5	mRNA	887	35.76	73	72.374
YOR283W	mRNA	692	45.76	72	71.3826
MSB2	mRNA	3920	44.505	72	71.3826
POM152	mRNA	4013	42.91	72	71.3826
HSK3	mRNA	209	39.845	72	71.3826
SSD1	mRNA	3752	56.08	72	71.3826
HPF1	mRNA	2903	54.745	72	71.3826
TVP38	mRNA	1013	44.455	72	71.3826
SEY1	mRNA	2330	41.245	72	71.3826
EUG1	mRNA	1553	41.665	72	71.3826
RSC6	mRNA	1451	50.25	72	71.3826
BNA3	mRNA	1334	51.275	72	71.3826
SHO1	mRNA	1103	41.41	72	71.3826
[truncated: 3,304 more rows]

## Sheet: PolyA_2
Feature name	Feature type	Feature length	Feature median tail length	number of reads	RPM
tL_28UAA_29D	tRNA	83	43.03	55	20.0069
tRNA-Phe	tRNA	804	34.92	49	17.8243
tD_28GUC_29N	tRNA	70	51.76	43	15.6418
tA_28UGC_29O	tRNA	72	36.46	35	12.7317
tP_28UGG_29O1	tRNA	72	36.85	29	10.5491
tV_28AAC_29O	tRNA	73	55.56	24	8.73029
tV_28AAC_29G3	tRNA	73	34.04	21	7.639
tK_28CUU_29C	tRNA	72	51.96	18	6.54772
tN_28GUU_29P	tRNA	73	50.27	18	6.54772
tH_28GUG_29E2	tRNA	71	44.125	16	5.82019
SOE1	tRNA	71	57.67	15	5.45643
tL_28UAG_29L1	tRNA	82	42.46	13	4.72891
tK_28UUU_29P	tRNA	73	25.17	12	4.36514
tM_28CAU_29C	tRNA	71	59.92	12	4.36514
tG_28GCC_29D2	tRNA	70	41.74	11	4.00138
tK_28UUU_29D	tRNA	73	66.99	10	3.63762
SUF7	tRNA	72	59.75	10	3.63762
tK_28CUU_29P	tRNA	72	70.15	9	3.27386
tL_28CAA_29L	tRNA	82	62.1	9	3.27386
tT_28AGU_29I1	tRNA	72	61.985	8	2.9101
tK_28CUU_29M	tRNA	72	42.61	8	2.9101
tH_28GUG_29E1	tRNA	71	57.01	8	2.9101
tH_28GUG_29G1	tRNA	71	32.475	8	2.9101
tD_28GUC_29O	tRNA	71	50.925	8	2.9101
tK_28UUU_29L	tRNA	73	38.57	7	2.54633
SUF1	tRNA	71	45.14	7	2.54633
tI_28AAU_29G	tRNA	73	46.79	7	2.54633
tE_28UUC_29G2	tRNA	71	42.25	7	2.54633
tA_28AGC_29P	tRNA	72	50.32	6	2.18257
tA_28AGC_29L	tRNA	72	33.16	6	2.18257
tE_28UUC_29J	tRNA	71	40.475	6	2.18257
tS_28AGA_29J	tRNA	81	70.425	6	2.18257
SUF8	tRNA	72	48.61	6	2.18257
tV_28UAC_29D	tRNA	73	45.04	5	1.81881
tG_28GCC_29P2	tRNA	70	41.55	5	1.81881
tE_28UUC_29E2	tRNA	71	37.39	5	1.81881
SUF10	tRNA	71	38.23	5	1.81881
tP_28UGG_29N1	tRNA	72	39.9	5	1.81881
SUF5	tRNA	71	48.63	5	1.81881
IMT4	tRNA	71	49.815	4	1.45505
tP_28UGG_29L	tRNA	72	45.14	4	1.45505
tA_28AGC_29M2	tRNA	72	24.465	4	1.45505
tR_28UCU_29K	tRNA	71	69.49	4	1.45505
tL_28UAG_29L2	tRNA	82	46.565	4	1.45505
tN_28GUU_29N1	tRNA	73	45.365	4	1.45505
tP_28UGG_29O3	tRNA	72	46.035	4	1.45505
tS_28AGA_29L	tRNA	81	69.99	4	1.45505
SUP17	tRNA	81	45.65	4	1.45505
SUP19	tRNA	81	55.84	4	1.45505
tK_28CUU_29E2	tRNA	72	37.585	4	1.45505
tD_28GUC_29G2	tRNA	71	48.88	3	1.09129
SUP51	tRNA	83	69.45	3	1.09129
tD_28GUC_29I1	tRNA	71	42.88	3	1.09129
tW_28CCA_29G2	tRNA	72	64.96	3	1.09129
tL_28GAG_29G	tRNA	81	47.58	3	1.09129
tV_28AAC_29G1	tRNA	73	59.05	3	1.09129
tW_28CCA_29P	tRNA	72	45.73	3	1.09129
tC_28GCA_29P2	tRNA	71	56.62	3	1.09129
SUF6	tRNA	71	46.57	3	1.09129
EMT2	tRNA	72	39.08	3	1.09129
tN_28GUU_29F	tRNA	73	38.2	3	1.09129
tT_28AGU_29D	tRNA	72	54.18	3	1.09129
tR_28UCU_29G3	tRNA	71	46.82	3	1.09129
tG_28GCC_29G1	tRNA	70	27.54	3	1.09129
tR_28UCU_29G2	tRNA	71	30.25	3	1.09129
tV_28AAC_29L	tRNA	73	43.17	3	1.09129
tS_28AGA_29E	tRNA	81	45.87	3	1.09129
tS_28AGA_29G	tRNA	81	32.73	3	1.09129
tN_28GUU_29G	tRNA	73	41.585	2	0.727524
tG_28GCC_29E	tRNA	70	30.64	2	0.727524
tD_28GUC_29G1	tRNA	71	64.9	2	0.727524
SUP2	tRNA	75	113.695	2	0.727524
SUP5	tRNA	75	50.225	2	0.727524
tT_28AGU_29N1	tRNA	72	58.595	2	0.727524
IMT2	tRNA	71	49.425	2	0.727524
tD_28GUC_29I2	tRNA	71	55.725	2	0.727524
tQ_28UUG_29C	tRNA	71	33.465	2	0.727524
tE_28UUC_29K	tRNA	71	62.225	2	0.727524
tL_28CAA_29N	tRNA	82	91.72	2	0.727524
tC_28GCA_29P1	tRNA	71	62.5	2	0.727524
tL_28UAA_29B1	tRNA	83	28.665	2	0.727524
EMT4	tRNA	72	51.5	2	0.727524
tV_28AAC_29E2	tRNA	73	41.07	2	0.727524
tV_28AAC_29K2	tRNA	73	64	2	0.727524
TGA1	tRNA	72	49.705	2	0.727524
tE_28UUC_29C	tRNA	71	56.165	2	0.727524
tT_28AGU_29O2	tRNA	72	63.31	2	0.727524
tN_28GUU_29K	tRNA	73	65.765	2	0.727524
tR_28ACG_29L	tRNA	72	67.815	2	0.727524
tR_28ACG_29D	tRNA	72	49.83	2	0.727524
tP_28UGG_29N2	tRNA	72	33.295	2	0.727524
tK_28UUU_29G2	tRNA	73	37.24	2	0.727524
tT_28UGU_29G1	tRNA	71	32.71	2	0.727524
tI_28AAU_29P1	tRNA	73	42.89	2	0.727524
tT_28UGU_29P	tRNA	71	72.335	2	0.727524
tK_28CUU_29E1	tRNA	72	34.045	2	0.727524
tA_28AGC_29G	tRNA	72	57.51	2	0.727524
tK_28CUU_29D2	tRNA	72	44.315	2	0.727524
TRT2	tRNA	71	15.84	1	0.363762
tV_28AAC_29H	tRNA	73	47.47	1	0.363762
tK_28CUU_29G1	tRNA	72	53.62	1	0.363762
SUP4	tRNA	75	39	1	0.363762
SUP7	tRNA	75	54	1	0.363762
tT_28AGU_29N2	tRNA	72	39.12	1	0.363762
tV_28AAC_29K1	tRNA	73	57.52	1	0.363762
SUP3	tRNA	75	58.77	1	0.363762
tE_28UUC_29E1	tRNA	71	51.32	1	0.363762
tA_28AGC_29K1	tRNA	72	18.83	1	0.363762
tV_28AAC_29G2	tRNA	73	21	1	0.363762
tS_28GCU_29F	tRNA	82	63.4	1	0.363762
TRN1	tRNA	72	76.93	1	0.363762
tE_28UUC_29L	tRNA	71	15.96	1	0.363762
tQ_28UUG_29B	tRNA	71	35.23	1	0.363762
tL_28UAA_29N	tRNA	83	30.85	1	0.363762
tE_28CUC_29D	tRNA	71	75.08	1	0.363762
tW_28CCA_29G1	tRNA	72	44.36	1	0.363762
SUF17	tRNA	70	39.4	1	0.363762
tA_28AGC_29K2	tRNA	72	25.32	1	0.363762
tA_28UGC_29G	tRNA	72	50.92	1	0.363762
tK_28CUU_29K	tRNA	72	60.29	1	0.363762
tH_28GUG_29H	tRNA	71	19.61	1	0.363762
TRR4	tRNA	71	26.04	1	0.363762
tQ_28UUG_29E1	tRNA	71	54.96	1	0.363762
tR_28ACG_29K	tRNA	72	32.58	1	0.363762
tT_28AGU_29B	tRNA	72	56.11	1	0.363762
tR_28UCU_29G1	tRNA	71	44.18	1	0.363762
tV_28AAC_29M2	tRNA	73	51	1	0.363762
tI_28AAU_29N2	tRNA	73	45.21	1	0.363762
tK_28UUU_29G1	tRNA	73	21.17	1	0.363762
tI_28AAU_29N1	tRNA	73	27.03	1	0.363762
tE_28UUC_29P	tRNA	71	44.39	1	0.363762
tK_28CUU_29D1	tRNA	72	54.54	1	0.363762
tI_28AAU_29D	tRNA	73	40.73	1	0.363762
tD_28GUC_29D	tRNA	71	51.27	1	0.363762
tD_28GUC_29B	tRNA	71	46.76	1	0.363762
tN_28GUU_29O2	tRNA	73	25.95	1	0.363762
tI_28AAU_29P2	tRNA	73	43.78	1	0.363762
tS_28AGA_29B	tRNA	81	63.62	1	0.363762
SUF2	tRNA	71	82.74	1	0.363762
SUF3	tRNA	71	41.72	1	0.363762
tS_28AGA_29D2	tRNA	81	67.55	1	0.363762
tH_28GUG_29K	tRNA	71	71.38	1	0.363762
tR_28UCU_29M1	tRNA	71	62.96	1	0.363762
tQ_28UUG_29L	tRNA	71	51.13	1	0.363762
tR_28UCU_29M2	tRNA	71	30.67	1	0.363762
tD_28GUC_29M	tRNA	71	14.83	1	0.363762
tK_28CUU_29G3	tRNA	72	15.85	1	0.363762
gag-pol_20fusion_20protein	transposable_element	217730	35.87	9721	3536.13
gag_20protein	transposable_element	53095	38.325	1668	606.755
YOR343C-B	transposable_element	5313	42.245	786	285.917
TY2B_B	transposable_element	5313	28.68	5	1.81881
YDR210W-C	transposable_element	1322	45.78	4	1.45505
YDR210W-D	transposable_element	5268	60.275	2	0.727524
YARCTyA1-1	transposable_element	1322	11.04	1	0.363762
YARCTyB1-1	transposable_element	3590	48.75	1	0.363762
TLC1	telomerase_RNA	1300	62.045	156	56.7469
LSR1	snRNA	1174	38.56	99	36.0124
SNR19	snRNA	567	58.92	21	7.639
SNR14	snRNA	159	55.4	11	4.00138
SNR7-S	snRNA	178	34.95	3	1.09129
SNR7-L	snRNA	213	43.11	1	0.363762
SNR24	snoRNA	88	29.92	7477	2719.85
SNR18	snoRNA	101	35.1	6242	2270.6
SNR39	snoRNA	88	30.9	3896	1417.22
SNR59	snoRNA	77	32.25	2817	1024.72
SNR38	snoRNA	94	33	2679	974.518
SNR44	snoRNA	210	35.495	2372	862.844
SNR43	snoRNA	208	37.26	421	153.144
SNR191	snoRNA	273	54.63	180	65.4772
SNR84	snoRNA	549	46.515	164	59.657
SNR86	snoRNA	1003	50.57	145	52.7455
SNR4	snoRNA	185	39.51	136	49.4716
SNR33	snoRNA	182	49.425	110	40.0138
SNR63	snoRNA	254	44.26	103	37.4675
SNR17B	snoRNA	332	42.69	92	33.4661
SNR42	snoRNA	350	51.485	76	27.6459
SNR9	snoRNA	186	39.68	75	27.2822
SNR49	snoRNA	164	56.71	73	26.5546
SNR57	snoRNA	87	46.425	62	22.5532
SNR41	snoRNA	94	47.255	62	22.5532
SNR31	snoRNA	224	38.45	59	21.462
SNR30	snoRNA	605	49.545	56	20.3707
SNR87	snoRNA	108	44.3	54	19.6431
SNR75	snoRNA	88	33.5	49	17.8243
SNR34	snoRNA	202	62.865	42	15.278
SNR67	snoRNA	81	42.08	41	14.9142
SNR10	snoRNA	244	56.62	39	14.1867
SNR83	snoRNA	305	69.485	38	13.823
SNR82	snoRNA	267	62.77	36	13.0954
SNR5	snoRNA	203	58.3	33	12.0041
SNR35	snoRNA	203	49.76	32	11.6404
SNR11	snoRNA	257	50.64	25	9.09405
SNR36	snoRNA	181	31.935	24	8.73029
SNR32	snoRNA	187	43.57	21	7.639
SNR8	snoRNA	189	41.575	20	7.27524
SNR47	snoRNA	98	47.325	20	7.27524
SNR68	snoRNA	135	59.2	20	7.27524
SNR60	snoRNA	103	38.785	20	7.27524
SNR66	snoRNA	85	34.09	19	6.91148
SNR69	snoRNA	100	63.9	18	6.54772
SNR37	snoRNA	385	53.04	17	6.18395
SNR58	snoRNA	95	49.32	15	5.45643
SNR50	snoRNA	89	36.165	14	5.09267
SNR128	snoRNA	125	56.745	14	5.09267
SNR70	snoRNA	163	62.32	14	5.09267
SNR13	snoRNA	123	39.56	13	4.72891
SNR40	snoRNA	96	30.71	12	4.36514
SNR56	snoRNA	87	36.43	11	4.00138
SNR39B	snoRNA	95	54.925	10	3.63762
SNR81	snoRNA	200	52.96	9	3.27386
SNR65	snoRNA	99	65.56	9	3.27386
SNR61	snoRNA	89	51.27	9	3.27386
SNR48	snoRNA	112	51.75	8	2.9101
SNR45	snoRNA	171	55.81	7	2.54633
SNR80	snoRNA	170	57.34	6	2.18257
SNR62	snoRNA	99	47.385	6	2.18257
SNR161	snoRNA	160	69.88	6	2.18257
SNR17A	snoRNA	333	35.9	6	2.18257
SNR190	snoRNA	189	33.77	5	1.81881
SNR3	snoRNA	193	62.87	5	1.81881
SNR85	snoRNA	170	60.31	5	1.81881
NME1	snoRNA	339	32.325	4	1.45505
SNR53	snoRNA	90	33.59	3	1.09129
SNR51	snoRNA	106	32.86	3	1.09129
SNR52	snoRNA	91	53.45	3	1.09129
SNR72	snoRNA	97	32.77	3	1.09129
SNR189	snoRNA	188	59.07	2	0.727524
SNR74	snoRNA	87	32.165	2	0.727524
SNR73	snoRNA	105	45.865	2	0.727524
SNR77	snoRNA	87	35.745	2	0.727524
SNR64	snoRNA	100	27	1	0.363762
SNR71	snoRNA	89	20.86	1	0.363762
SNR76	snoRNA	108	69.87	1	0.363762
SNR79	snoRNA	83	19.74	1	0.363762
RDN25-2	rRNA	3395	36.98	350	127.317
ETS1-2	rRNA	699	46.91	122	44.379
NTS2-2	rRNA	1242	37.465	60	21.8257
RDN58-2	rRNA	157	33.805	54	19.6431
RDN5-2	rRNA	118	21.78	43	15.6418
RDN18-2	rRNA	1799	47.515	34	12.3679
ITS1-2	rRNA	0	57.64	30	10.9129
NTS1-2	rRNA	914	65.645	16	5.82019
RDN37-2	rRNA	6266	40.97	6	2.18257
RDN5-5	rRNA	118	49.17	6	2.18257
ITS2-2	rRNA	0	69.67	4	1.45505
NTS2-1	rRNA	1242	40.43	3	1.09129
RDN5-6	rRNA	120	65.08	3	1.09129
RUF21	ncRNA	706	31.19	744	270.639
RUF20	ncRNA	442	36	735	267.365
SRG1	ncRNA	550	51.96	129	46.9253
IRT1	ncRNA	1488	54.83	39	14.1867
SCR1	ncRNA	521	29	24	8.73029
RUF5-1	ncRNA	709	34.39	24	8.73029
RME3	ncRNA	1904	56.87	23	8.36653
RPR1	ncRNA	368	28.52	16	5.82019
RUF5-2	ncRNA	709	57.84	11	4.00138
ICR1	ncRNA	3198	49.96	8	2.9101
RUF23	ncRNA	253	30.84	5	1.81881
PWR1	ncRNA	940	79	3	1.09129
RME2	ncRNA	2222	66.765	2	0.727524
RUF22	ncRNA	514	77.32	1	0.363762
TDH2	mRNA	998	37.51	43031	15653
FBA1	mRNA	1079	34	39951	14532.7
TEF1	mRNA	1376	29.5	39780	14470.5
RPS31	mRNA	458	30.04	32617	11864.8
GPM1	mRNA	743	34.04	32343	11765.2
ENO2	mRNA	1313	32.83	31473	11448.7
ADH1	mRNA	1046	35.12	30167	10973.6
TDH3	mRNA	998	35.85	24926	9067.13
RPS12	mRNA	431	27.23	21071	7664.83
TPI1	mRNA	746	35.67	19902	7239.59
PDC1	mRNA	1691	31.25	19130	6958.77
CDC19	mRNA	1502	34.285	18930	6886.02
CCW12	mRNA	401	38.5	17206	6258.89
RPS8B	mRNA	610	29.55	16911	6151.58
PGK1	mRNA	1250	35.62	15789	5743.44
RPL28	mRNA	450	28.37	15541	5653.23
RPL25	mRNA	429	27.91	13994	5090.49
RPL1A	mRNA	653	33.68	13327	4847.86
RPS20	mRNA	365	28.775	12744	4635.78
ENO1	mRNA	1313	38.775	12470	4536.11
RPS3	mRNA	722	30.92	12419	4517.56
RPL38	mRNA	236	30	12317	4480.46
RPS23B	mRNA	438	27.52	12306	4476.46
RPL30	mRNA	318	30.48	12288	4469.91
RPS5	mRNA	677	28.46	11949	4346.59
RPS25A	mRNA	342	32.36	11927	4338.59
RPS6A	mRNA	711	28.37	11741	4270.93
RPS4A	mRNA	786	28.05	11645	4236.01
TMA19	mRNA	503	31.81	11479	4175.62
RPL23B	mRNA	414	27.09	11367	4134.88
RPS2	mRNA	764	27.8	11249	4091.96
RPS26A	mRNA	370	29.04	11088	4033.39
RPL35B	mRNA	363	28.96	10855	3948.64
RPL40A	mRNA	387	28.71	10732	3903.89
RPS14A	mRNA	414	29.46	10664	3879.16
RPL36B	mRNA	303	30.04	10635	3868.61
RPL31A	mRNA	342	26.87	10446	3799.86
RPL14A	mRNA	417	29.95	10362	3769.3
RPL3	mRNA	1163	33	10200	3710.37
RPS30A	mRNA	192	33	10136	3687.09
RPL42A	mRNA	321	28.19	10052	3656.54
RPL9A	mRNA	575	28.89	9901	3601.61
RPL32	mRNA	393	28.35	9829	3575.42
RPL27A	mRNA	411	27.13	9824	3573.6
RPL43A	mRNA	279	28.5	9811	3568.87
RPS24A	mRNA	408	26.32	9776	3556.14
RPL26B	mRNA	384	30.12	9739	3542.68
RPS28A	mRNA	203	29.05	9579	3484.48
RPS13	mRNA	456	27.76	9532	3467.38
RPS9B	mRNA	588	27.78	9522	3463.74
RPP1A	mRNA	320	28.54	9389	3415.36
RPS7A	mRNA	573	27.37	9330	3393.9
RPL11A	mRNA	524	28.08	9160	3332.06
RPS15	mRNA	428	30.14	9148	3327.7
RPL10	mRNA	665	37.12	9062	3296.41
RPL18A	mRNA	561	29.05	8995	3272.04
RPS1B	mRNA	767	26.08	8968	3262.22
HOR7	mRNA	179	36.52	8862	3223.66
RPL4B	mRNA	1088	34.125	8676	3156
RPS22A	mRNA	392	31.44	8583	3122.17
RPL13B	mRNA	600	29.64	8543	3107.62
RPS21A	mRNA	264	34.2	8539	3106.16
RPS10A	mRNA	318	35.65	8418	3062.15
RPL34B	mRNA	366	28.62	8354	3038.87
RPS23A	mRNA	438	26.94	8189	2978.85
RPL2A	mRNA	765	26.24	8144	2962.48
RPL12B	mRNA	497	27.92	8143	2962.11
RPL22A	mRNA	366	30.235	7970	2899.18
RPL24A	mRNA	475	29.625	7962	2896.27
RPS16A	mRNA	432	29.48	7956	2894.09
RPL20B	mRNA	519	28.7	7944	2889.73
CWP2	mRNA	278	39.4	7901	2874.08
RPP1B	mRNA	321	29.98	7891	2870.45
RPS18B	mRNA	441	30.12	7864	2860.62
RPL33A	mRNA	324	30.435	7852	2856.26
SSB2	mRNA	1841	29.7	7770	2826.43
RPS1A	mRNA	767	30.13	7768	2825.7
RPL6A	mRNA	531	31.92	7763	2823.88
RPL40B	mRNA	387	32.74	7755	2820.97
RPS18A	mRNA	441	29.73	7739	2815.15
RPL19B	mRNA	570	30	7733	2812.97
RPL8B	mRNA	770	30.69	7704	2802.42
CPR1	mRNA	488	32.17	7695	2799.15
RPL21A	mRNA	483	30.05	7486	2723.12
RPP0	mRNA	938	30.81	7477	2719.85
RPP2B	mRNA	332	28.36	7400	2691.84
RPS19B	mRNA	435	29.62	7391	2688.57
RPL5	mRNA	893	31.04	7218	2625.63
RPL21B	mRNA	483	30.52	6946	2526.69
RPL2B	mRNA	765	28.24	6929	2520.51
RPL42B	mRNA	321	30.2	6878	2501.96
STM1	mRNA	821	29.77	6854	2493.22
RPS21B	mRNA	264	27.75	6852	2492.5
RPS17A	mRNA	411	30.18	6776	2464.85
RPL41B	mRNA	77	36.32	6747	2454.3
CUP1-2	mRNA	185	43.36	6732	2448.85
RPL16B	mRNA	597	30.56	6648	2418.29
RPP2A	mRNA	320	32.195	6614	2405.92
RPS16B	mRNA	432	30.15	6437	2341.54
RPL37A	mRNA	267	30.39	6397	2326.99
RPL15A	mRNA	614	34.9	6390	2324.44
RPL37B	mRNA	267	34	6363	2314.62
GLN1	mRNA	1112	35.545	6326	2301.16
TSA1	mRNA	590	31.95	6148	2236.41
RPL24B	mRNA	475	28.35	6090	2215.31
RPS26B	mRNA	360	30.96	6000	2182.57
RPS17B	mRNA	411	30.475	5980	2175.3
RPL17A	mRNA	555	30.57	5941	2161.11
RPL39	mRNA	156	31.635	5928	2156.38
RPL19A	mRNA	570	29.04	5833	2121.82
RPL23A	mRNA	414	27.39	5821	2117.46
RPL20A	mRNA	519	30.34	5670	2062.53
RPL41A	mRNA	77	32.605	5626	2046.53
RPS19A	mRNA	435	29.37	5581	2030.16
RPL12A	mRNA	497	32.65	5515	2006.15
RPS0A	mRNA	759	27.85	5510	2004.33
TDH1	mRNA	998	45.555	5428	1974.5
RPL34A	mRNA	366	27.64	5332	1939.58
HHT2	mRNA	410	39.23	5268	1916.3
RPS30B	mRNA	192	32.9	5203	1892.65
RPS10B	mRNA	318	28.78	5155	1875.19
RPL43B	mRNA	279	28.04	5145	1871.56
ZEO1	mRNA	341	37.935	4796	1744.6
RPS27B	mRNA	249	30.61	4783	1739.87
RPS11A	mRNA	471	28.19	4679	1702.04
NKP1	mRNA	716	28	4677	1701.32
ACT1	mRNA	1128	33.59	4674	1700.22
GPP1	mRNA	752	30.43	4661	1695.49
HTA2	mRNA	398	31.54	4588	1668.94
RPS11B	mRNA	471	31.5	4551	1655.48
EFT1	mRNA	2528	33.25	4514	1642.02
SOD1	mRNA	464	29.32	4468	1625.29
PGI1	mRNA	1664	33.33	4367	1588.55
RPL29	mRNA	183	28.21	4359	1585.64
RPL16A	mRNA	600	30.5	4339	1578.36
HTA1	mRNA	398	38.11	4285	1558.72
HTB1	mRNA	395	38.835	4200	1527.8
SED1	mRNA	1016	46.52	4162	1513.98
AHP1	mRNA	530	29.11	4130	1502.34
RPL27B	mRNA	411	31.61	4068	1479.78
HXK1	mRNA	1457	43.07	4067	1479.42
RPS0B	mRNA	759	29	4037	1468.51
EGO4	mRNA	296	38.9	4029	1465.6
RPS28B	mRNA	203	35.55	4003	1456.14
STF2	mRNA	254	36.32	3983	1448.86
PSA1	mRNA	1085	31.015	3926	1428.13
HXT4	mRNA	1730	40.21	3897	1417.58
TIF1	mRNA	1187	33.1	3886	1413.58
RPS29B	mRNA	183	33.73	3860	1404.12
RPL26A	mRNA	384	30.03	3825	1391.39
ARF1	mRNA	545	28.915	3788	1377.93
MMF1	mRNA	437	35.1	3707	1348.47
EGD2	mRNA	524	31.48	3690	1342.28
EGD1	mRNA	473	31.23	3682	1339.37
RPS29A	mRNA	176	28.79	3652	1328.46
HXT6	mRNA	1712	45.86	3638	1323.37
RPS25B	mRNA	340	29.155	3554	1292.81
RPL36A	mRNA	303	26.54	3537	1286.63
RPL13A	mRNA	600	29.5	3461	1258.98
BMH1	mRNA	803	30.86	3456	1257.16
HHT1	mRNA	410	40.4	3445	1253.16
YEF3	mRNA	3134	33.065	3440	1251.34
COF1	mRNA	432	31.91	3421	1244.43
RPL33B	mRNA	324	25.73	3329	1210.96
HHF1	mRNA	311	43	3329	1210.96
HSP150	mRNA	1241	48.35	3239	1178.23
VTC1	mRNA	389	33.49	3188	1159.67
RPL14B	mRNA	417	30.24	3183	1157.85
FPR1	mRNA	344	34.445	3160	1149.49
PHO84	mRNA	1763	43.715	3072	1117.48
TRX2	mRNA	314	30.645	3066	1115.29
ACB1	mRNA	263	35.59	3052	1110.2
RPS27A	mRNA	249	36.04	2997	1090.19
GSP1	mRNA	659	31.89	2995	1089.47
RPL17B	mRNA	555	31.32	2963	1077.83
VMA3	mRNA	482	41.92	2868	1043.27
HXK2	mRNA	1460	41.705	2828	1028.72
RPL8A	mRNA	770	31.78	2805	1020.35
RPL35A	mRNA	363	29.73	2765	1005.8
POR1	mRNA	851	39.74	2754	1001.8
SUI1	mRNA	326	37.12	2729	992.707
MRH1	mRNA	962	45.47	2723	990.524
RPS7B	mRNA	573	31.965	2694	979.975
PMP1	mRNA	122	44.64	2632	957.422
PFY1	mRNA	381	36.5	2626	955.239
TRX1	mRNA	311	34.58	2559	930.867
PNC1	mRNA	650	35.27	2535	922.137
RPS24B	mRNA	408	33.73	2512	913.77
HSC82	mRNA	2117	30.725	2508	912.315
RPL31B	mRNA	342	29.1	2502	910.133
BGL2	mRNA	941	44.25	2453	892.308
IPP1	mRNA	863	34.24	2426	882.487
NOP10	mRNA	176	33.52	2424	881.759
TIP1	mRNA	632	43.355	2408	875.939
HYP2	mRNA	473	45.81	2394	870.846
ATP2	mRNA	1535	34.98	2386	867.936
RPL11B	mRNA	524	28.45	2355	856.66
RPL6B	mRNA	531	32.17	2329	847.202
CIS3	mRNA	683	42.48	2259	821.738
ASP3-4	mRNA	1088	40.42	2230	811.189
YRB1	mRNA	605	38.12	2183	794.093
GCN4	mRNA	845	43.68	2153	783.18
HHF2	mRNA	311	40.245	2144	779.906
YOP1	mRNA	543	41.05	2134	776.268
GAS1	mRNA	1679	42.5	2119	770.812
SSA2	mRNA	1919	33.63	2106	766.083
TIF11	mRNA	461	31.075	2092	760.99
GIS2	mRNA	461	29.85	2091	760.626
PDI1	mRNA	1568	32.21	2065	751.169
SBA1	mRNA	650	32.35	2053	746.803
MPC2	mRNA	389	38.595	2046	744.257
MIC26	mRNA	701	35.915	2034	739.892
URA1	mRNA	944	37.845	2028	737.709
LSP1	mRNA	1025	41.715	2016	733.344
OLE1	mRNA	1532	43.37	1977	719.158
ECM33	mRNA	1290	42.18	1966	715.156
PMP3	mRNA	167	41.885	1946	707.881
VMA10	mRNA	345	35.58	1943	706.79
ADK1	mRNA	668	34.315	1938	704.971
PMP2	mRNA	131	51.35	1936	704.243
HSP104	mRNA	2726	40.76	1928	701.333
YNL208W	mRNA	599	38.35	1922	699.151
SSS1	mRNA	242	33.38	1913	695.877
PHO5	mRNA	1403	38.36	1909	694.422
ADE13	mRNA	1448	35.94	1908	694.058
TMA7	mRNA	194	32.64	1903	692.239
CDC33	mRNA	641	33.355	1882	684.6
SAH1	mRNA	1349	36.05	1861	676.961
TIM10	mRNA	281	33.65	1841	669.686
GLK1	mRNA	1502	42.19	1841	669.686
MBF1	mRNA	455	52.78	1799	654.408
SND3	mRNA	566	37.38	1798	654.044
VMA4	mRNA	701	35.815	1796	653.317
SNU13	mRNA	380	36.35	1777	646.405
NCE102	mRNA	521	47.4	1726	627.853
TAL1	mRNA	1007	36.55	1699	618.032
RIB4	mRNA	509	33.44	1695	616.577
PMA1	mRNA	2756	42.535	1692	615.485
RPL9B	mRNA	575	34.48	1685	612.939
ILV5	mRNA	1187	53.27	1677	610.029
HOM2	mRNA	1097	32.91	1659	603.481
EMI2	mRNA	1502	38.11	1646	598.752
HSP10	mRNA	320	35.83	1619	588.931
KRS1	mRNA	1775	29.54	1617	588.203
YDL124W	mRNA	938	42.62	1611	586.021
SEC53	mRNA	764	34	1601	582.383
HTB2	mRNA	395	39.82	1601	582.383
SBP1	mRNA	884	32.69	1597	580.928
UGP1	mRNA	1499	42.73	1595	580.2
SES1	mRNA	1388	31.04	1585	576.563
KTR5	mRNA	1568	46.075	1572	571.834
CYS4	mRNA	1523	38.04	1565	569.288
FCY1	mRNA	476	36.33	1563	568.56
OLA1	mRNA	1184	32.87	1545	562.012
TPM1	mRNA	599	31.36	1544	561.649
OYE2	mRNA	1202	35.88	1543	561.285
UBC4	mRNA	447	37.49	1542	560.921
RNR4	mRNA	1037	35.155	1540	560.194
PGM2	mRNA	1709	43.83	1536	558.738
YLR257W	mRNA	965	40.3	1535	558.375
PHO12	mRNA	1403	37.835	1512	550.008
YER010C	mRNA	704	33.86	1507	548.189
DDR48	mRNA	1292	43.5	1507	548.189
PET9	mRNA	956	40.31	1500	545.643
SMT3	mRNA	305	32.105	1476	536.913
BMH2	mRNA	905	35.38	1444	525.272
ARO4	mRNA	1112	33.09	1437	522.726
RHO1	mRNA	629	38.96	1405	511.086
SUB2	mRNA	1340	36.29	1403	510.358
RTN1	mRNA	887	41.625	1394	507.084
BAT1	mRNA	1181	34.065	1394	507.084
VOA1	mRNA	797	35.555	1370	498.354
ARF2	mRNA	585	38.04	1366	496.899
SUI3	mRNA	857	32.66	1356	493.261
HOM6	mRNA	1079	32.375	1356	493.261
NHP2	mRNA	470	33.04	1344	488.896
ARC1	mRNA	1130	31.375	1342	488.169
SBH2	mRNA	266	31	1341	487.805
CMD1	mRNA	443	37.23	1338	486.714
ASN1	mRNA	1718	32.26	1329	483.44
HIS1	mRNA	893	35.96	1323	481.257
YPT1	mRNA	620	33.3	1318	479.438
GDH1	mRNA	1364	33.73	1312	477.256
HXT3	mRNA	1703	39.29	1307	475.437
YRA1	mRNA	681	38.44	1299	472.527
SNA3	mRNA	401	34.78	1294	470.708
ATP17	mRNA	305	37.48	1293	470.344
EXG1	mRNA	1346	44.115	1290	469.253
YPL225W	mRNA	440	37.36	1289	468.889
PYP1	mRNA	725	34.07	1287	468.162
SHM2	mRNA	1409	49.52	1285	467.434
VMA7	mRNA	356	42.15	1279	465.252
SSC1	mRNA	1964	39.75	1263	459.431
ZUO1	mRNA	1301	30.635	1262	459.068
SAR1	mRNA	573	35.985	1254	456.158
QCR8	mRNA	284	37.02	1254	456.158
CCW14	mRNA	716	40.29	1251	455.066
GND1	mRNA	1469	30.43	1251	455.066
QCR7	mRNA	383	35.41	1246	453.247
RDL1	mRNA	419	38.1	1244	452.52
ATP4	mRNA	734	38.15	1242	451.792
TKL1	mRNA	2042	31.35	1239	450.701
ADE12	mRNA	1301	36.46	1239	450.701
YNK1	mRNA	461	40.39	1237	449.974
VMA11	mRNA	494	36.24	1235	449.246
TRR1	mRNA	959	33.27	1234	448.882
ERG11	mRNA	1592	37.81	1229	447.064
ATP18	mRNA	179	30.95	1221	444.153
NSR1	mRNA	1244	33.02	1218	443.062
GUK1	mRNA	563	33.14	1217	442.698
ILV3	mRNA	1757	33.54	1212	440.88
PAA1	mRNA	575	37.625	1212	440.88
THS1	mRNA	2204	32.23	1197	435.423
HPT1	mRNA	665	44.81	1196	435.059
PEP4	mRNA	1217	36.58	1195	434.696
RPO26	mRNA	468	35.22	1189	432.513
MEO1	mRNA	206	49	1186	431.422
NOP56	mRNA	1514	29.48	1181	429.603
ATP16	mRNA	482	32.4	1165	423.783
RGI1	mRNA	485	46.26	1164	423.419
ADO1	mRNA	1022	29	1160	421.964
APE3	mRNA	1613	33.96	1158	421.236
YGP1	mRNA	1064	50.185	1156	420.509
EMP24	mRNA	611	34.115	1154	419.781
PIL1	mRNA	1019	46.96	1152	419.054
HNT1	mRNA	477	38.87	1151	418.69
YET1	mRNA	620	37.96	1147	417.235
SML1	mRNA	314	51.27	1141	415.052
ADH3	mRNA	1127	35.61	1133	412.142
HXT2	mRNA	1625	49.265	1132	411.779
STE2	mRNA	1295	48.83	1127	409.96
ADE17	mRNA	1778	41.39	1119	407.05
DED81	mRNA	1664	31.05	1119	407.05
GRX1	mRNA	332	36.89	1117	406.322
ERG20	mRNA	1058	34	1109	403.412
SSE1	mRNA	2081	29.75	1107	402.685
SUP45	mRNA	1313	34.9	1103	401.23
YSA1	mRNA	695	35.37	1103	401.23
SEM1	mRNA	269	35.765	1100	400.138
ERG6	mRNA	1151	37.17	1099	399.774
NTF2	mRNA	377	34.47	1092	397.228
VMA8	mRNA	770	31.27	1091	396.864
VMA13	mRNA	1436	35.13	1080	392.863
ATP19	mRNA	206	33.08	1078	392.135
PRE9	mRNA	776	37.395	1078	392.135
CBR1	mRNA	854	32.705	1062	386.315
RPL7B	mRNA	736	31.85	1060	385.588
UTR2	mRNA	1403	41.88	1060	385.588
PRC1	mRNA	1598	42.395	1060	385.588
PDA1	mRNA	1262	33.885	1056	384.133
ARC15	mRNA	464	37.21	1056	384.133
YBR085C-A	mRNA	257	45.145	1052	382.678
SSZ1	mRNA	1616	30.32	1051	382.314
SGT2	mRNA	1040	34.92	1050	381.95
PIC2	mRNA	902	35.96	1050	381.95
SAM1	mRNA	1148	35.64	1047	380.859
GUS1	mRNA	2126	33.85	1031	375.039
CDC48	mRNA	2507	35.87	1024	372.492
PST2	mRNA	596	39.065	1024	372.492
ERG2	mRNA	668	31.865	1022	371.765
ARO2	mRNA	1130	29.73	1022	371.765
TPS1	mRNA	1487	38.75	1022	371.765
GAR1	mRNA	617	30.26	1018	370.31
YHB1	mRNA	1199	40.11	1015	369.218
RET3	mRNA	569	36.045	1010	367.4
PDB1	mRNA	1100	35.955	1010	367.4
YET3	mRNA	611	38.86	1007	366.308
HMO1	mRNA	740	36.175	1006	365.945
SCL1	mRNA	758	35.915	1006	365.945
ECM15	mRNA	314	35.82	1005	365.581
NHP6A	mRNA	281	36.745	1004	365.217
NPL3	mRNA	1244	36.67	1003	364.853
CTS1	mRNA	1688	42.8	1001	364.126
RIM1	mRNA	408	37.755	1000	363.762
GPH1	mRNA	2708	46.32	993	361.216
GCV3	mRNA	512	32.69	991	360.488
RFS1	mRNA	632	43.37	988	359.397
GRS1	mRNA	2003	31.45	988	359.397
TIF35	mRNA	824	33.17	987	359.033
PRE6	mRNA	764	29.73	985	358.306
SRL1	mRNA	632	35.94	985	358.306
VMA6	mRNA	1037	41.1	981	356.851
SUR2	mRNA	1049	40.3	979	356.123
RPB10	mRNA	212	41.915	978	355.759
ALD6	mRNA	1502	46	976	355.032
NOP1	mRNA	983	33.95	974	354.304
MDH1	mRNA	1004	33.635	972	353.577
PUP2	mRNA	782	31.51	972	353.577
TIF3	mRNA	1310	28.97	971	353.213
ERG10	mRNA	1196	34.33	965	351.03
YSY6	mRNA	197	31.745	960	349.212
CPR5	mRNA	677	34.91	959	348.848
SPI1	mRNA	446	46.38	958	348.484
VTC3	mRNA	2507	36.08	953	346.665
CYS3	mRNA	1184	35.725	950	345.574
CHA1	mRNA	1082	38.6	949	345.21
ASN2	mRNA	1718	36.18	949	345.21
YKT6	mRNA	602	35.96	948	344.846
GPD1	mRNA	1175	34.38	939	341.573
PRE1	mRNA	596	35.5	937	340.845
ERG25	mRNA	929	43.3	935	340.117
MGE1	mRNA	686	34.65	935	340.117
SHR3	mRNA	632	33.42	929	337.935
UTH1	mRNA	1097	45.68	927	337.207
PRE2	mRNA	863	35.05	923	335.752
ERV25	mRNA	635	32.715	916	333.206
TIF34	mRNA	1043	35.18	915	332.842
GRX2	mRNA	431	37.81	915	332.842
ABF2	mRNA	551	45.035	908	330.296
COX8	mRNA	236	40.54	908	330.296
IMD4	mRNA	1575	34.135	906	329.568
ATP7	mRNA	524	39.04	904	328.841
HMF1	mRNA	389	36.865	904	328.841
GET3	mRNA	1064	32.7	904	328.841
HEM13	mRNA	986	43.55	901	327.75
COX13	mRNA	389	35.04	901	327.75
PFK1	mRNA	2963	37.1	896	325.931
PRE10	mRNA	866	36.435	894	325.203
QCR9	mRNA	201	48.42	891	324.112
CAF20	mRNA	485	37.76	889	323.384
TIM11	mRNA	290	37.19	880	320.111
SPL2	mRNA	446	39.98	880	320.111
ATP3	mRNA	935	34.89	877	319.019
DPS1	mRNA	1673	33.095	876	318.656
ATP1	mRNA	1637	37.19	875	318.292
URA5	mRNA	680	38	875	318.292
ATP15	mRNA	188	40.815	874	317.928
TYS1	mRNA	1184	33.705	874	317.928
SDH3	mRNA	596	38.2	873	317.564
CBF5	mRNA	1451	31.485	870	316.473
SAM4	mRNA	977	29.91	860	312.835
CLC1	mRNA	701	33.74	859	312.472
ERG3	mRNA	1097	43.02	858	312.108
THR4	mRNA	1544	36.265	852	309.925
TOM6	mRNA	185	39.035	846	307.743
YRO2	mRNA	1034	40.04	843	306.651
ACP1	mRNA	377	36.7	843	306.651
ADE5_2C7	mRNA	2408	34.65	840	305.56
WTM1	mRNA	1313	39.15	839	305.196
ARA1	mRNA	1034	39.42	839	305.196
SCS2	mRNA	734	36.36	837	304.469
FAA4	mRNA	2084	42.44	837	304.469
COX12	mRNA	251	39.5	835	303.741
IMD3	mRNA	1571	29.43	832	302.65
PIS1	mRNA	662	40.62	831	302.286
RPS9A	mRNA	594	44.96	831	302.286
CAM1	mRNA	1247	34.75	830	301.922
MCR1	mRNA	965	41.935	830	301.922
COX4	mRNA	480	43.19	829	301.559
PIR1	mRNA	1025	46.835	828	301.195
RPN8	mRNA	1016	32.33	827	300.831
RPS4B	mRNA	786	27.53	826	300.467
ARC19	mRNA	515	37.35	826	300.467
PUP3	mRNA	617	39.335	814	296.102
TOS1	mRNA	1367	33.21	812	295.375
COX6	mRNA	446	42.39	805	292.828
COR1	mRNA	1373	36.06	801	291.373
SBH1	mRNA	248	35.32	801	291.373
PRE5	mRNA	704	35.815	800	291.01
PGA2	mRNA	389	31.8	799	290.646
GLC7	mRNA	939	36.58	798	290.282
ERV14	mRNA	416	40.65	795	289.191
YMR295C	mRNA	593	38.48	793	288.463
PRE3	mRNA	648	34.38	792	288.1
TMH11	mRNA	317	38.7	789	287.008
RNR2	mRNA	1199	41.15	787	286.281
ATP5	mRNA	638	38	787	286.281
NHP6B	mRNA	327	40.52	785	285.553
ELO1	mRNA	932	40.83	785	285.553
FCY2	mRNA	1601	45.82	783	284.826
SCW10	mRNA	1169	43.02	782	284.462
DBP2	mRNA	1641	29.48	781	284.098
LSM6	mRNA	260	35.635	780	283.734
GUA1	mRNA	1577	29.8	779	283.371
INA1	mRNA	2027	50.84	779	283.371
KAR2	mRNA	2048	37.86	779	283.371
SDD2	mRNA	437	33.58	775	281.916
SUI2	mRNA	914	35.75	775	281.916
UBI4	mRNA	1145	53.52	772	280.824
CIT1	mRNA	1439	42.71	769	279.733
RPN5	mRNA	1337	38.04	765	278.278
DUG1	mRNA	1445	34.04	764	277.914
ERG28	mRNA	446	39.65	757	275.368
ICY1	mRNA	383	40.83	756	275.004
SER1	mRNA	1187	35.65	753	273.913
COX5B	mRNA	456	39.475	750	272.822
RPN13	mRNA	470	36.41	749	272.458
HSP82	mRNA	2129	44.46	747	271.73
ARP2	mRNA	1176	36.64	746	271.366
PRE4	mRNA	800	35.82	742	269.911
FRS1	mRNA	1787	35.37	739	268.82
MLC1	mRNA	449	36.24	738	268.456
TUF1	mRNA	1313	41.59	733	266.638
ILS1	mRNA	3218	35.65	733	266.638
APA1	mRNA	965	36.855	732	266.274
AYR1	mRNA	893	40.03	729	265.183
VMA9	mRNA	223	33.885	728	264.819
MUP1	mRNA	1724	47.435	726	264.091
VAS1	mRNA	3314	31.47	724	263.364
CTF8	mRNA	401	35.13	723	263
ATP14	mRNA	374	42.9	719	261.545
QCR6	mRNA	443	30.7	719	261.545
VMA16	mRNA	641	36.125	718	261.181
IDH2	mRNA	1109	36.92	717	260.817
SPE3	mRNA	881	35.29	713	259.362
YPT31	mRNA	671	31.96	713	259.362
RPL22B	mRNA	369	51.595	710	258.271
VMA2	mRNA	1553	43.14	709	257.907
RPT6	mRNA	1217	38.17	707	257.18
LPD1	mRNA	1499	36.25	707	257.18
SKP1	mRNA	584	38.55	706	256.816
RPB8	mRNA	440	33.19	703	255.725
SOD2	mRNA	701	39.12	703	255.725
HSP60	mRNA	1718	38.58	703	255.725
VMA1	mRNA	3215	35.52	703	255.725
GVP36	mRNA	980	37.55	703	255.725
SEC28	mRNA	890	35.39	698	253.906
PRE7	mRNA	725	38.88	691	251.36
TIF5	mRNA	1217	40.33	690	250.996
MRP8	mRNA	659	35.375	690	250.996
SNC2	mRNA	347	36.83	689	250.632
YPT7	mRNA	626	31.51	688	250.268
PUP1	mRNA	785	37.09	687	249.905
ARC40	mRNA	1154	38.355	686	249.541
TSC13	mRNA	932	38	686	249.541
SIS1	mRNA	1058	39.17	686	249.541
YLR179C	mRNA	605	41.03	683	248.449
MIC10	mRNA	293	32.59	683	248.449
LSM7	mRNA	348	35.705	678	246.631
VTC4	mRNA	2165	40.32	677	246.267
RPB5	mRNA	647	39.33	675	245.539
KIN3	mRNA	1307	40.87	675	245.539
RPT2	mRNA	1313	34.545	672	244.448
ACO1	mRNA	2336	37.58	671	244.084
MXR1	mRNA	554	41.67	669	243.357
ELO3	mRNA	1037	36.05	669	243.357
EMC4	mRNA	572	36.295	668	242.993
ITR1	mRNA	1754	42.73	667	242.629
GCD11	mRNA	1583	34.735	666	242.266
IZH2	mRNA	953	45.345	666	242.266
HIS4	mRNA	2399	36.55	665	241.902
SCS7	mRNA	1154	38.79	665	241.902
YDJ1	mRNA	1229	37.59	663	241.174
HYR1	mRNA	491	40.065	662	240.81
YCP4	mRNA	743	38.11	661	240.447
YMR226C	mRNA	803	32.625	660	240.083
IRC22	mRNA	677	32.16	659	239.719
CWP1	mRNA	719	52.275	658	239.355
HTS1	mRNA	1640	32	657	238.992
HRI1	mRNA	734	35.33	656	238.628
ARC18	mRNA	536	36.52	655	238.264
SAM2	mRNA	1154	47.365	654	237.9
APT1	mRNA	563	41.445	654	237.9
CRH1	mRNA	1523	41.64	653	237.537
SFT1	mRNA	294	39.6	651	236.809
SCW4	mRNA	1160	52.68	650	236.445
FOL2	mRNA	731	31.645	648	235.718
YDR341C	mRNA	1823	33.62	648	235.718
ARO3	mRNA	1112	35.41	643	233.899
YMR315W	mRNA	1049	40.56	643	233.899
FAS2	mRNA	5663	40.54	641	233.171
ERG4	mRNA	1421	35	639	232.444
RPT1	mRNA	1403	34.855	638	232.08
GSY1	mRNA	2126	39.895	638	232.08
OST1	mRNA	1430	37.04	635	230.989
RPL18B	mRNA	561	36.615	632	229.898
VMA5	mRNA	1178	37.79	631	229.534
MIX17	mRNA	470	40.04	627	228.079
WBP1	mRNA	1292	37.285	626	227.715
VPH1	mRNA	2522	38.15	626	227.715
PHO86	mRNA	935	35.07	624	226.988
HSP42	mRNA	1127	38.76	623	226.624
GPP2	mRNA	752	45.71	623	226.624
LAT1	mRNA	1448	29.6	623	226.624
ATP20	mRNA	347	36.19	623	226.624
TSC3	mRNA	242	39.09	621	225.896
ADH6	mRNA	1082	39.5	620	225.532
PUB1	mRNA	1361	40.425	620	225.532
PGA3	mRNA	938	34.12	619	225.169
TOM22	mRNA	458	38.36	619	225.169
NOP58	mRNA	1535	38.48	619	225.169
RPS14B	mRNA	417	35.92	617	224.441
ILV6	mRNA	929	35.21	616	224.077
RIB3	mRNA	626	34.89	616	224.077
FPR3	mRNA	1235	26.03	615	223.714
PRS1	mRNA	1283	40.99	614	223.35
LHP1	mRNA	827	29.54	614	223.35
ARB1	mRNA	1832	36.51	614	223.35
KRE2	mRNA	1328	41.95	613	222.986
FPR4	mRNA	1178	27.73	612	222.622
STF1	mRNA	260	40.04	612	222.622
MET14	mRNA	608	44.76	612	222.622
RPN6	mRNA	1304	36.35	611	222.259
RAS2	mRNA	968	35.19	609	221.531
GLO1	mRNA	980	40.64	608	221.167
DYS1	mRNA	1163	32.6	608	221.167
INH1	mRNA	257	49.79	606	220.44
GSF2	mRNA	1211	42.73	605	220.076
ELF1	mRNA	437	33.55	605	220.076
RPC10	mRNA	212	39.56	603	219.349
RVS161	mRNA	797	41.62	600	218.257
OST5	mRNA	261	40.8	599	217.893
VPS68	mRNA	554	41.2	597	217.166
SOP4	mRNA	704	33.87	596	216.802
RPN3	mRNA	1571	37.27	594	216.075
LEU1	mRNA	2339	34.23	594	216.075
MET6	mRNA	2303	55.065	592	215.347
PRO3	mRNA	860	33.345	592	215.347
PBI2	mRNA	227	42.855	590	214.62
MNP1	mRNA	584	39.77	589	214.256
ARP3	mRNA	1349	38.52	588	213.892
CDC42	mRNA	575	36.08	586	213.165
HCR1	mRNA	797	34.775	586	213.165
WRS1	mRNA	1298	34.67	585	212.801
AIM41	mRNA	557	35.575	584	212.437
PRE8	mRNA	752	40.055	584	212.437
HMRA1	mRNA	382	40.91	583	212.073
NDE1	mRNA	1682	44.225	582	211.709
GSY2	mRNA	2117	43.48	582	211.709
UMP1	mRNA	446	39.055	580	210.982
AHC2	mRNA	386	37.46	579	210.618
SER33	mRNA	1409	42.24	578	210.254
RNA1	mRNA	1223	35.51	576	209.527
NOP7	mRNA	1817	27	575	209.163
PPN2	mRNA	980	38.58	575	209.163
ADE2	mRNA	1715	44.89	574	208.799
CMK2	mRNA	1343	39.61	573	208.436
ERP1	mRNA	659	34.57	573	208.436
CCT7	mRNA	1652	39.48	571	207.708
PRY2	mRNA	989	45.395	570	207.344
RPN12	mRNA	824	38.925	570	207.344
RIB5	mRNA	716	35.125	570	207.344
NAP1	mRNA	1253	34.19	569	206.981
RPT4	mRNA	1313	40.31	568	206.617
MRT4	mRNA	710	39	567	206.253
CCT4	mRNA	1586	32	567	206.253
RPN10	mRNA	806	32.59	564	205.162
LIA1	mRNA	977	28.72	561	204.07
COQ5	mRNA	923	36.88	560	203.707
CPR3	mRNA	548	35.245	558	202.979
PRY1	mRNA	899	49.61	557	202.615
MDM35	mRNA	260	41.08	556	202.252
SRP21	mRNA	503	39.25	556	202.252
RPN11	mRNA	920	37.22	555	201.888
ZRC1	mRNA	1328	35.94	554	201.524
RPC40	mRNA	1007	35.4	553	201.16
TOM5	mRNA	152	41.28	553	201.16
TMA22	mRNA	596	35.05	552	200.797
MDH3	mRNA	1031	37.34	550	200.069
LSC1	mRNA	989	41.48	550	200.069
RTC3	mRNA	335	36.65	549	199.705
DLD3	mRNA	1490	40.08	548	199.342
AIM29	mRNA	467	38.39	547	198.978
TPM2	mRNA	485	36.8	546	198.614
MDH2	mRNA	1133	53.02	546	198.614
CPR6	mRNA	1115	33.83	545	198.25
PAB1	mRNA	1733	40.23	545	198.25
QCR2	mRNA	1106	38.7	545	198.25
PST1	mRNA	1334	42.7	543	197.523
URA4	mRNA	1094	33.95	542	197.159
SEC13	mRNA	893	34.195	540	196.431
PDX3	mRNA	686	36.56	540	196.431
SFM1	mRNA	641	33.78	538	195.704
ERV46	mRNA	1247	34.065	536	194.976
MAP1	mRNA	1163	37.325	536	194.976
HTZ1	mRNA	404	34.62	535	194.613
GDT1	mRNA	842	38.805	534	194.249
ADE8	mRNA	644	36.6	532	193.521
CCT2	mRNA	1583	36.605	532	193.521
MSC1	mRNA	1541	39.43	531	193.158
LSM2	mRNA	288	44.11	531	193.158
SAC6	mRNA	1929	39.865	530	192.794
PTC3	mRNA	1406	38.205	530	192.794
ARC35	mRNA	1028	37.67	529	192.43
NPC2	mRNA	521	44.84	529	192.43
PRT1	mRNA	2291	38.62	529	192.43
FRS2	mRNA	1511	32.26	529	192.43
NCW2	mRNA	764	42.13	528	192.066
TMA17	mRNA	452	38.23	527	191.703
ADE1	mRNA	920	36.54	527	191.703
TVP18	mRNA	503	41.53	527	191.703
SHB17	mRNA	815	35.95	526	191.339
TIM17	mRNA	476	38.71	525	190.975
HAC1	mRNA	717	50.26	525	190.975
FSH1	mRNA	731	36.81	525	190.975
ILV1	mRNA	1730	33.2	524	190.611
OM14	mRNA	405	42.77	523	190.248
SSA1	mRNA	1928	38.425	522	189.884
VTC2	mRNA	2486	38.815	522	189.884
LOG1	mRNA	737	36.4	522	189.884
TPS2	mRNA	2690	47.36	520	189.156
MIR1	mRNA	935	44.11	520	189.156
LIP1	mRNA	452	37.1	520	189.156
RPS8A	mRNA	610	31.57	519	188.792
ERP2	mRNA	647	36.03	519	188.792
MES1	mRNA	2255	33.83	519	188.792
ARL1	mRNA	551	36.12	519	188.792
TMA20	mRNA	546	32.37	519	188.792
MRPS12	mRNA	461	43.24	518	188.429
GAS5	mRNA	1454	42.52	517	188.065
GGC1	mRNA	902	37.85	515	187.337
RPB11	mRNA	362	32.15	515	187.337
WWM1	mRNA	635	33.145	514	186.974
PTH2	mRNA	626	38	513	186.61
MTD1	mRNA	962	51.17	512	186.246
NIP7	mRNA	545	34.91	511	185.882
GLC3	mRNA	2114	43.31	508	184.791
DSE2	mRNA	977	50.93	507	184.427
DAP1	mRNA	458	40.65	507	184.427
PHB2	mRNA	932	39.85	506	184.064
BFR1	mRNA	1412	36.105	506	184.064
MAP2	mRNA	1265	34.755	506	184.064
SND2	mRNA	545	37.33	505	183.7
RVS167	mRNA	1448	39.38	505	183.7
CCT5	mRNA	1688	34.21	505	183.7
AAT2	mRNA	1256	37.54	505	183.7
FAS1	mRNA	6155	42.7	505	183.7
COX5A	mRNA	461	40.28	504	183.336
BRX1	mRNA	875	33.73	503	182.972
ARO8	mRNA	1502	34.64	501	182.245
NPT1	mRNA	1289	38.43	501	182.245
YOS1	mRNA	259	34.58	501	182.245
IFA38	mRNA	1043	39.945	500	181.881
IDI1	mRNA	866	35.86	500	181.881
MIA40	mRNA	1211	41.335	498	181.153
RPN7	mRNA	1289	39.41	498	181.153
SVF1	mRNA	1445	39.135	498	181.153
VPS74	mRNA	1037	36.58	497	180.79
GLR1	mRNA	1451	37.08	497	180.79
DPM1	mRNA	803	37.725	496	180.426
CBC2	mRNA	626	41.79	495	180.062
AMN1	mRNA	1649	50.67	495	180.062
URA6	mRNA	614	35.83	494	179.698
CCT8	mRNA	1706	38.05	493	179.335
PHO8	mRNA	1700	44.92	490	178.243
YDC1	mRNA	953	38.72	489	177.88
PRO2	mRNA	1370	32.82	487	177.152
PDR5	mRNA	4535	43.5	485	176.425
OST2	mRNA	392	40.935	484	176.061
PFK2	mRNA	2879	40.605	484	176.061
ALD4	mRNA	1559	42.78	484	176.061
SRP14	mRNA	440	35.09	484	176.061
YMR099C	mRNA	893	32.66	484	176.061
HRP1	mRNA	1604	40.81	481	174.97
YHR020W	mRNA	2066	30.655	480	174.606
CDC60	mRNA	3272	33.56	479	174.242
SSP120	mRNA	704	36.32	479	174.242
THR1	mRNA	1073	35.575	478	173.878
SVS1	mRNA	782	41.36	478	173.878
FUR1	mRNA	650	33.31	478	173.878
CCT6	mRNA	1640	38.57	477	173.514
TOM7	mRNA	182	37.93	477	173.514
DOG2	mRNA	740	42.44	476	173.151
GLY1	mRNA	1163	52.925	474	172.423
RPL1B	mRNA	653	37.32	474	172.423
VPS55	mRNA	422	38.88	473	172.059
HSP30	mRNA	998	40.46	472	171.696
LSM5	mRNA	281	28.325	470	170.968
BAP3	mRNA	1814	41.25	469	170.604
RPT3	mRNA	1286	37.87	469	170.604
MDM34	mRNA	1379	39.45	467	169.877
GDI1	mRNA	1355	48.43	467	169.877
ACS2	mRNA	2051	35.625	466	169.513
HSP12	mRNA	329	36.64	463	168.422
TRP5	mRNA	2123	36.76	463	168.422
TFS1	mRNA	659	38.43	461	167.694
KTR4	mRNA	1394	42.915	460	167.331
KGD2	mRNA	1391	38.56	459	166.967
YIP3	mRNA	531	43.23	459	166.967
RIP1	mRNA	647	40.48	458	166.603
NIT3	mRNA	875	39.06	458	166.603
MRPL50	mRNA	419	41.12	457	166.239
FPR2	mRNA	407	38.08	457	166.239
SEC66	mRNA	620	39.83	457	166.239
LEU4	mRNA	1859	37.965	456	165.875
RPN1	mRNA	2981	34.65	455	165.512
RCF2	mRNA	674	36.09	455	165.512
ERG24	mRNA	1316	41.13	454	165.148
PHO13	mRNA	938	39.8	454	165.148
KES1	mRNA	1304	41.745	454	165.148
RUB1	mRNA	234	32.04	453	164.784
BAT2	mRNA	1130	36.57	453	164.784
RLP24	mRNA	599	43.155	452	164.42
SSH1	mRNA	1472	37.365	452	164.42
GIM3	mRNA	389	41.17	452	164.42
VTA1	mRNA	992	33.18	451	164.057
SRV2	mRNA	1580	35.32	451	164.057
RPT5	mRNA	1304	39.08	451	164.057
COX9	mRNA	179	43.38	451	164.057
PMI40	mRNA	1290	35.77	450	163.693
TMC1	mRNA	452	56.55	450	163.693
ADE16	mRNA	1775	37.545	450	163.693
LCB2	mRNA	1685	30.74	449	163.329
RPN2	mRNA	2837	37.11	446	162.238
STI1	mRNA	1769	39.605	446	162.238
SRP54	mRNA	1625	37.2	445	161.874
VPS24	mRNA	674	40.845	444	161.51
CAJ1	mRNA	1175	35.69	444	161.51
RVB1	mRNA	1391	37.49	444	161.51
ALD5	mRNA	1562	47.74	443	161.147
PHB1	mRNA	863	41.37	442	160.783
CAP2	mRNA	863	41.39	441	160.419
RFA3	mRNA	368	36.88	441	160.419
LSC2	mRNA	1283	39.24	441	160.419
MRP2	mRNA	347	39.11	440	160.055
CCT3	mRNA	1604	35.555	440	160.055
LYS12	mRNA	1115	33.57	439	159.692
SEC17	mRNA	879	38.65	439	159.692
SDH2	mRNA	800	45.5	439	159.692
TOM70	mRNA	1853	38.08	438	159.328
TMA10	mRNA	260	46.63	437	158.964
HIS3	mRNA	662	36.97	437	158.964
UBC7	mRNA	497	37.355	436	158.6
CYT1	mRNA	929	38.865	436	158.6
GET4	mRNA	938	35.48	433	157.509
ADE3	mRNA	2840	42.36	433	157.509
AGP1	mRNA	1901	50.37	433	157.509
RBD2	mRNA	788	37.77	432	157.145
TIM8	mRNA	263	39.835	432	157.145
RPG1	mRNA	2894	38.72	432	157.145
ADD66	mRNA	803	35.915	432	157.145
LSM1	mRNA	518	39.31	432	157.145
FAA1	mRNA	2102	41.34	432	157.145
MCA1	mRNA	1298	38.24	431	156.781
RCK2	mRNA	1832	43.17	431	156.781
SEC62	mRNA	824	36.62	430	156.418
CNB1	mRNA	528	37.065	430	156.418
FKS1	mRNA	5630	42.745	428	155.69
TUB1	mRNA	1344	29.17	427	155.326
ECT1	mRNA	971	37.34	426	154.963
SPO24	mRNA	203	47.96	425	154.599
VPS1	mRNA	2114	34.93	422	153.508
NOP15	mRNA	662	37.38	421	153.144
BNA7	mRNA	785	37.26	420	152.78
SEC63	mRNA	1991	34.365	420	152.78
RER1	mRNA	566	41.86	419	152.416
COX17	mRNA	209	42.72	418	152.053
RDI1	mRNA	608	37.86	417	151.689
END3	mRNA	1049	40.9	417	151.689
BUR6	mRNA	428	40.67	417	151.689
TAF14	mRNA	735	38.83	417	151.689
LTP1	mRNA	485	33.45	417	151.689
CYC7	mRNA	341	35.16	417	151.689
ZRT2	mRNA	1268	42.13	416	151.325
ISD11	mRNA	284	44.035	416	151.325
THO1	mRNA	656	37.465	416	151.325
CHO1	mRNA	830	48	415	150.961
HOG1	mRNA	1307	39.29	415	150.961
KTR1	mRNA	1181	41.87	415	150.961
SUP35	mRNA	2057	40.035	414	150.597
KSH1	mRNA	218	46.67	414	150.597
RLP7	mRNA	968	40.18	413	150.234
TIF6	mRNA	737	54.645	412	149.87
ZRT1	mRNA	1130	47.3	411	149.506
ARG4	mRNA	1391	40.1	411	149.506
UBC1	mRNA	647	35.205	410	149.142
SEC11	mRNA	503	40.3	409	148.779
RPF2	mRNA	1034	37.91	407	148.051
CHS5	mRNA	2015	40.76	406	147.687
APD1	mRNA	950	39.2	405	147.324
BDH1	mRNA	1148	40.9	405	147.324
PRX1	mRNA	785	38.425	404	146.96
PYC2	mRNA	3542	37.31	403	146.596
EXP1	mRNA	449	30.82	402	146.232
GET1	mRNA	707	36.82	402	146.232
IMP1	mRNA	572	38.75	401	145.869
SDH4	mRNA	545	43.785	400	145.505
ERG13	mRNA	1475	38.81	399	145.141
PEX34	mRNA	434	44.125	398	144.777
VPS21	mRNA	632	39.89	398	144.777
GBP2	mRNA	1283	36.13	398	144.777
LSO2	mRNA	278	46.17	397	144.414
COS1	mRNA	1145	41.21	397	144.414
KRE29	mRNA	1394	38.19	397	144.414
PPH21	mRNA	1109	40.24	397	144.414
ZWF1	mRNA	1517	41.175	396	144.05
CCS1	mRNA	749	33.4	395	143.686
ATG27	mRNA	815	33.22	394	143.322
RAM2	mRNA	950	37.525	394	143.322
SEC21	mRNA	2807	38.745	394	143.322
TMH18	mRNA	486	38.09	394	143.322
DPH5	mRNA	902	37.08	393	142.958
MRPL39	mRNA	212	46.41	391	142.231
ELO2	mRNA	1043	38.38	391	142.231
RPB4	mRNA	665	42.06	390	141.867
SDT1	mRNA	842	50.985	390	141.867
EMC5	mRNA	425	38.96	390	141.867
RRB1	mRNA	1535	34.295	390	141.867
PCL5	mRNA	689	46.46	389	141.503
CDC10	mRNA	968	37.78	389	141.503
PRS3	mRNA	962	39.21	388	141.14
NYV1	mRNA	762	47.86	383	139.321
COX7	mRNA	182	41.8	382	138.957
ADE6	mRNA	4076	37.42	382	138.957
TPD3	mRNA	1907	39.625	382	138.957
STT3	mRNA	2156	38.715	382	138.957
TCP1	mRNA	1679	41.07	381	138.593
RPE1	mRNA	716	34.115	380	138.23
PHS1	mRNA	653	41.08	378	137.502
IGO1	mRNA	506	47.57	378	137.502
ODC2	mRNA	923	33.82	377	137.138
RPB7	mRNA	515	42.08	377	137.138
APS2	mRNA	443	40.14	376	136.775
FET4	mRNA	1658	52.535	376	136.775
EFB1	mRNA	621	36.16	376	136.775
HEM2	mRNA	1028	40.74	375	136.411
MFA2	mRNA	116	48.04	374	136.047
LSM12	mRNA	563	35.945	374	136.047
SRP1	mRNA	1628	39.19	373	135.683
KRR1	mRNA	950	33.95	373	135.683
YPT52	mRNA	704	35.97	373	135.683
ARD1	mRNA	716	39.74	373	135.683
MNN10	mRNA	1181	39.26	373	135.683
SWP1	mRNA	860	38.77	373	135.683
HMT1	mRNA	1046	43.71	372	135.319
TIM13	mRNA	317	35.82	372	135.319
DSE1	mRNA	1721	52.805	370	134.592
PTM1	mRNA	1571	38.1	370	134.592
DID2	mRNA	614	37	369	134.228
GLC8	mRNA	689	37.43	369	134.228
LSB1	mRNA	725	43.3	369	134.228
SSO1	mRNA	872	38.46	368	133.864
KTR3	mRNA	1214	36.995	368	133.864
TUB3	mRNA	1338	33.96	367	133.501
RSM18	mRNA	416	38.89	367	133.501
GRX3	mRNA	752	35.22	367	133.501
MRPL51	mRNA	422	38.2	367	133.501
SSB1	mRNA	1841	29.12	367	133.501
MRPL37	mRNA	317	41.315	366	133.137
KRE9	mRNA	830	43.075	366	133.137
CHZ1	mRNA	461	32.025	366	133.137
ALA1	mRNA	2876	33.655	366	133.137
COA3	mRNA	257	41.52	365	132.773
OPI3	mRNA	620	44	365	132.773
TIM23	mRNA	668	41.75	365	132.773
TEF4	mRNA	1239	29.89	365	132.773
UIP3	mRNA	707	42.395	364	132.409
PHO3	mRNA	1403	31.115	364	132.409
CCP1	mRNA	1085	40.64	363	132.046
PET309	mRNA	2897	39.53	362	131.682
ERG27	mRNA	1043	36.98	362	131.682
SLT2	mRNA	1454	46.45	362	131.682
PMT2	mRNA	2279	32.54	362	131.682
NTH1	mRNA	2255	46.415	362	131.682
ERV29	mRNA	932	40.965	362	131.682
YPR1	mRNA	938	39	361	131.318
DUT1	mRNA	443	39.155	360	130.954
NCB2	mRNA	441	34.935	360	130.954
LSM4	mRNA	563	38.19	360	130.954
ADE4	mRNA	1532	41.85	359	130.591
CSG2	mRNA	1232	43.68	359	130.591
IGO2	mRNA	395	42.42	359	130.591
MLC2	mRNA	491	36.865	358	130.227
NOP16	mRNA	695	33.095	358	130.227
HIS5	mRNA	1157	37.08	357	129.863
CKB1	mRNA	836	36	357	129.863
ATX1	mRNA	221	39.565	356	129.499
DCW1	mRNA	1349	31.48	356	129.499
MET22	mRNA	1073	39.5	356	129.499
CRN1	mRNA	1955	38.74	356	129.499
SPT4	mRNA	308	46.69	355	129.136
CHO2	mRNA	2609	47.33	355	129.136
CKB2	mRNA	776	39	355	129.136
ECM14	mRNA	1292	38.85	354	128.772
MPC1	mRNA	392	41.63	354	128.772
ESF1	mRNA	1886	44.11	353	128.408
ARO9	mRNA	1541	44.32	353	128.408
FUN12	mRNA	3008	35.07	352	128.044
GRX5	mRNA	452	38.8	352	128.044
TOM40	mRNA	1163	46.36	352	128.044
YPK1	mRNA	2042	38.27	351	127.68
GLN4	mRNA	2429	37	351	127.68
ACC1	mRNA	6701	33.37	350	127.317
GPD2	mRNA	1322	42.33	350	127.317
ETT1	mRNA	1238	35.54	349	126.953
CPR2	mRNA	617	36.72	348	126.589
CIC1	mRNA	1130	42	347	126.225
GFA1	mRNA	2153	40.15	347	126.225
EMC3	mRNA	761	40.08	347	126.225
RPC19	mRNA	428	40.19	347	126.225
IMD2	mRNA	1571	37.28	347	126.225
CGR1	mRNA	362	30.84	344	125.134
SEC72	mRNA	581	40.625	344	125.134
YIP5	mRNA	932	40.685	344	125.134
ALE1	mRNA	1859	39.505	344	125.134
YPT6	mRNA	647	38.835	344	125.134
SCD6	mRNA	1049	35.5	343	124.77
STE4	mRNA	1271	45.2	343	124.77
TYE7	mRNA	875	47.79	343	124.77
PAM17	mRNA	593	41.69	341	124.043
SIM1	mRNA	1433	46	341	124.043
TIF2	mRNA	1187	31.95	341	124.043
YBR056W	mRNA	1505	39.595	340	123.679
SEC65	mRNA	821	36.155	340	123.679
URM1	mRNA	299	33.935	340	123.679
BCY1	mRNA	1250	40	339	123.315
NIF3	mRNA	866	33.31	339	123.315
EMC1	mRNA	2282	40.79	339	123.315
ISU1	mRNA	497	48.83	339	123.315
ILM1	mRNA	611	36.48	339	123.315
HRR25	mRNA	1484	42.6	339	123.315
DID4	mRNA	699	39.04	338	122.952
THG1	mRNA	713	42.48	338	122.952
SUR7	mRNA	908	45.31	338	122.952
REE1	mRNA	596	37.105	338	122.952
QDR2	mRNA	1628	49.245	338	122.952
LAG1	mRNA	1235	37.92	337	122.588
DOT6	mRNA	2012	42.6	337	122.588
SNF4	mRNA	968	39.87	337	122.588
PEA2	mRNA	1262	38.01	336	122.224
GGA2	mRNA	1757	38.35	336	122.224
TRP2	mRNA	1523	37.13	336	122.224
MNN9	mRNA	1187	38.715	336	122.224
CDC3	mRNA	1562	38.705	336	122.224
CRS1	mRNA	2303	31.94	336	122.224
YGR130C	mRNA	2450	47.565	336	122.224
IDH1	mRNA	1082	38.14	335	121.86
MTC1	mRNA	1436	40.11	335	121.86
YJU3	mRNA	941	40.03	335	121.86
YPI1	mRNA	467	36.865	334	121.497
BTN2	mRNA	1232	42.93	334	121.497
TED1	mRNA	1421	33.33	334	121.497
FPY1	mRNA	824	42.04	333	121.133
HEK2	mRNA	1145	30.88	333	121.133
ERG5	mRNA	1616	51.13	332	120.769
APQ12	mRNA	416	44.06	332	120.769
CKA2	mRNA	1019	43.095	332	120.769
RPA34	mRNA	701	38.62	331	120.405
ORM2	mRNA	650	42.33	329	119.678
LYP1	mRNA	1835	39.33	329	119.678
YIP4	mRNA	707	41.2	329	119.678
SPN1	mRNA	1232	37.93	329	119.678
YHM2	mRNA	944	40.77	328	119.314
ERG26	mRNA	1049	38.465	328	119.314
AIM7	mRNA	449	42.245	328	119.314
LAC1	mRNA	1256	43.44	328	119.314
GCV1	mRNA	1202	47.59	327	118.95
HHO1	mRNA	776	39.67	327	118.95
LAP2	mRNA	2015	43.12	327	118.95
TPO3	mRNA	1868	44.91	327	118.95
ESS1	mRNA	512	39.73	327	118.95
AIM6	mRNA	1172	39.035	326	118.586
RNH70	mRNA	1661	37.56	326	118.586
PDR16	mRNA	1055	43.15	325	118.223
MRPL31	mRNA	395	41.16	325	118.223
CUE1	mRNA	611	31.41	325	118.223
POL30	mRNA	776	40.995	324	117.859
TOM20	mRNA	551	39.46	324	117.859
ETR1	mRNA	1142	39.245	324	117.859
IMG2	mRNA	440	41.705	324	117.859
AVT7	mRNA	1472	42.11	323	117.495
YJR096W	mRNA	848	36.71	323	117.495
SSO2	mRNA	887	39.35	323	117.495
IZH1	mRNA	950	45.2	323	117.495
YPR148C	mRNA	1307	37.58	323	117.495
TOA2	mRNA	368	41.49	322	117.131
FUM1	mRNA	1466	33.455	322	117.131
GCN20	mRNA	2258	39.5	322	117.131
ERG1	mRNA	1490	39.9	321	116.768
NSA2	mRNA	785	42.48	321	116.768
SUS1	mRNA	292	40.3	321	116.768
EMP47	mRNA	1337	37.39	321	116.768
SAC1	mRNA	1871	33.795	320	116.404
SCP160	mRNA	3668	36.16	320	116.404
RVB2	mRNA	1415	41.3	320	116.404
CUZ1	mRNA	824	29.91	319	116.04
PAN5	mRNA	1139	35.6	319	116.04
POM33	mRNA	839	45.785	318	115.676
IST2	mRNA	2840	38.03	317	115.313
YPR204W	mRNA	3098	51.29	317	115.313
RSM7	mRNA	743	42.92	316	114.949
GNA1	mRNA	479	41.995	316	114.949
RAD33	mRNA	533	39.04	316	114.949
ERO1	mRNA	1691	42.68	316	114.949
MXR2	mRNA	506	38.76	315	114.585
DIP5	mRNA	1826	45.47	314	114.221
AIP1	mRNA	1847	35.8	313	113.858
TNA1	mRNA	1604	40.92	313	113.858
NUG1	mRNA	1562	32.62	313	113.858
YRB2	mRNA	983	32.42	313	113.858
UBP6	mRNA	1499	40.52	313	113.858
SMI1	mRNA	1517	38.64	313	113.858
EBP2	mRNA	1283	35.44	313	113.858
YMR31	mRNA	371	47.69	313	113.858
MRP10	mRNA	287	41.145	312	113.494
SDO1	mRNA	752	41.395	312	113.494
SEC22	mRNA	644	39.4	312	113.494
PAM16	mRNA	449	36.22	311	113.13
DAD1	mRNA	284	45.08	311	113.13
DBP5	mRNA	1448	33.28	311	113.13
LAP3	mRNA	1364	42.07	310	112.766
SHM1	mRNA	1472	37.85	310	112.766
KRE1	mRNA	941	40.795	310	112.766
LYS21	mRNA	1322	39.24	309	112.402
RTS1	mRNA	2273	38.35	309	112.402
MRX14	mRNA	317	39.535	308	112.039
MIM1	mRNA	341	34.34	308	112.039
ERV41	mRNA	1059	38.185	308	112.039
MGM101	mRNA	809	34.68	308	112.039
RAD6	mRNA	518	39.805	308	112.039
DDP1	mRNA	566	32.64	307	111.675
VTI1	mRNA	653	41.96	307	111.675
SNL1	mRNA	479	39.79	307	111.675
HAP4	mRNA	1664	46.55	306	111.311
TIM50	mRNA	1430	39.19	306	111.311
YOR283W	mRNA	692	45.37	306	111.311
RRP7	mRNA	893	44.75	305	110.947
MDY2	mRNA	638	39.5	305	110.947
NAT5	mRNA	530	47.39	305	110.947
CUP9	mRNA	920	49.03	304	110.584
TCB3	mRNA	4637	34.905	304	110.584
UPS2	mRNA	692	35	304	110.584
SNF7	mRNA	722	38.945	304	110.584
CUB1	mRNA	1655	43.29	304	110.584
RPB9	mRNA	368	44	303	110.22
UBC13	mRNA	462	31.61	303	110.22
SUB1	mRNA	878	32.855	302	109.856
NOP2	mRNA	1856	34.61	302	109.856
RRT8	mRNA	1029	38.85	302	109.856
SEC23	mRNA	2306	45.11	302	109.856
GCS1	mRNA	1058	36.915	302	109.856
CDC37	mRNA	1520	36.78	301	109.492
MRP7	mRNA	1115	41.85	301	109.492
MRPL38	mRNA	416	43.98	300	109.129
ILV2	mRNA	2063	46.28	300	109.129
FIS1	mRNA	467	36.01	300	109.129
EMC6	mRNA	326	43.69	300	109.129
YPD1	mRNA	503	38.855	300	109.129
FCF1	mRNA	569	46.14	299	108.765
SEC61	mRNA	1442	40.48	299	108.765
YRF1-7	mRNA	5580	52.24	299	108.765
RAD23	mRNA	1196	35.43	299	108.765
DYN2	mRNA	280	31.725	298	108.401
GDA1	mRNA	1556	39.145	298	108.401
MIC19	mRNA	512	38.68	298	108.401
PLP2	mRNA	860	36.06	298	108.401
TAF9	mRNA	473	38.29	298	108.401
ERD2	mRNA	660	39.42	297	108.037
NSG2	mRNA	899	42.67	297	108.037
QCR10	mRNA	234	48.39	297	108.037
YER134C	mRNA	536	38.15	297	108.037
EMC2	mRNA	878	40.57	297	108.037
CST26	mRNA	1193	40.68	297	108.037
MRPL23	mRNA	491	42.755	296	107.674
EMG1	mRNA	758	41.935	296	107.674
CIR1	mRNA	785	40.505	296	107.674
LCB1	mRNA	1676	38.325	296	107.674
RBL2	mRNA	320	34.18	295	107.31
NOP6	mRNA	677	32.31	294	106.946
DFG5	mRNA	1376	37.935	294	106.946
TIF4631	mRNA	2858	42.11	293	106.582
BUD20	mRNA	500	33.555	292	106.219
TVP23	mRNA	599	35.02	292	106.219
DBP9	mRNA	1784	40.735	292	106.219
OM45	mRNA	1181	38.33	292	106.219
MRI1	mRNA	1235	33.5	291	105.855
DPP1	mRNA	869	39.09	291	105.855
SRP68	mRNA	1799	47.56	291	105.855
ARO7	mRNA	770	40.3	291	105.855
HMRA2	mRNA	359	44.84	291	105.855
SSU1	mRNA	1376	44.15	291	105.855
YMR027W	mRNA	1412	37.89	291	105.855
YBL028C	mRNA	320	36.995	290	105.491
NCP1	mRNA	2075	33.57	290	105.491
PAN6	mRNA	929	37.49	290	105.491
UGA1	mRNA	1415	42.61	290	105.491
MRPL6	mRNA	644	44.12	289	105.127
MVD1	mRNA	1190	43.04	289	105.127
RDL2	mRNA	449	41.42	289	105.127
HOM3	mRNA	1583	45.52	289	105.127
FRD1	mRNA	1412	41.375	288	104.763
TVP15	mRNA	431	41.745	288	104.763
SRP72	mRNA	1922	43.895	288	104.763
DPL1	mRNA	1769	40.42	288	104.763
LSM3	mRNA	269	28.28	287	104.4
STP3	mRNA	1031	41.03	287	104.4
TIR1	mRNA	764	51	287	104.4
ASP1	mRNA	1145	36.52	287	104.4
DBP3	mRNA	1571	32.04	287	104.4
HAS1	mRNA	1517	32.255	286	104.036
BAP2	mRNA	1829	56.545	286	104.036
PMT1	mRNA	2453	34.805	286	104.036
LOC1	mRNA	614	35.935	286	104.036
FRQ1	mRNA	572	38.23	286	104.036
RHO5	mRNA	995	39.17	285	103.672
SOL3	mRNA	749	34.92	285	103.672
COS6	mRNA	1145	43.42	285	103.672
CDC12	mRNA	1223	35.05	285	103.672
HAM1	mRNA	593	43.085	284	103.308
GLO3	mRNA	1481	41.735	284	103.308
YNL190W	mRNA	614	48.47	284	103.308
NMD3	mRNA	1556	36.175	284	103.308
CNL1	mRNA	368	40.72	284	103.308
CYB5	mRNA	362	41.925	284	103.308
ADH5	mRNA	1055	42.28	283	102.945
CDC11	mRNA	1247	40.2	283	102.945
MNN2	mRNA	1793	39.96	283	102.945
COP1	mRNA	3605	35.42	283	102.945
PPX1	mRNA	1193	39.04	283	102.945
GAD1	mRNA	1757	40.85	283	102.945
RCF1	mRNA	479	35.74	283	102.945
EAF3	mRNA	1205	35.45	283	102.945
AIM45	mRNA	1034	40.03	282	102.581
MAK31	mRNA	266	39.87	282	102.581
PLN1	mRNA	851	39.165	282	102.581
PNO1	mRNA	824	41.635	282	102.581
GPI16	mRNA	1832	36.425	282	102.581
DSK2	mRNA	1121	36.77	282	102.581
MET3	mRNA	1535	44.61	281	102.217
MRPL44	mRNA	297	47.41	281	102.217
ENT3	mRNA	1226	39.14	280	101.853
NNR2	mRNA	1013	39.02	280	101.853
TOH1	mRNA	1190	58.24	280	101.853
UBA1	mRNA	3074	39.46	279	101.49
CAB5	mRNA	725	40	279	101.49
CYC1	mRNA	329	36.8	279	101.49
MRPL20	mRNA	587	42.67	279	101.49
SLC1	mRNA	911	44.435	278	101.126
STE18	mRNA	332	36.57	277	100.762
HUB1	mRNA	221	40.81	277	100.762
BNA3	mRNA	1334	43.5	277	100.762
YDL012C	mRNA	324	39.36	277	100.762
MKT1	mRNA	2492	34.865	276	100.398
PUN1	mRNA	791	44.505	276	100.398
AGE1	mRNA	1448	40.645	276	100.398
PAM18	mRNA	506	42.45	275	100.035
MRPS9	mRNA	836	44.055	274	99.6708
NSG1	mRNA	875	42.705	274	99.6708
SEC14	mRNA	915	50.11	274	99.6708
GID8	mRNA	1367	50.64	273	99.307
RAD14	mRNA	1116	44.835	272	98.9433
YRF1-5	mRNA	5390	54.205	272	98.9433
MET16	mRNA	785	43.04	272	98.9433
MRPS18	mRNA	653	41.62	271	98.5795
BOS1	mRNA	735	42.26	271	98.5795
FES1	mRNA	872	37	271	98.5795
SFT2	mRNA	647	41.245	270	98.2157
RPB3	mRNA	956	35.845	270	98.2157
PCL1	mRNA	839	42.815	270	98.2157
LDB7	mRNA	542	41.98	270	98.2157
BCP1	mRNA	851	34.97	270	98.2157
ALT1	mRNA	1778	41.265	270	98.2157
RPA49	mRNA	1247	35.775	270	98.2157
GLO2	mRNA	824	36.17	269	97.852
RHO3	mRNA	695	37.7	269	97.852
UBC6	mRNA	752	38.71	269	97.852
HRB1	mRNA	1365	44.55	269	97.852
ZPR1	mRNA	1460	45.43	269	97.852
FET3	mRNA	1910	49.71	268	97.4882
GPI15	mRNA	690	48.065	268	97.4882
MRP51	mRNA	1034	39.91	268	97.4882
TRP1	mRNA	674	41.13	267	97.1245
NEW1	mRNA	3590	41.12	267	97.1245
YKE2	mRNA	344	31.43	266	96.7607
COX26	mRNA	200	43.825	266	96.7607
DAK1	mRNA	1754	39.055	266	96.7607
EFM5	mRNA	748	30.155	266	96.7607
GIM4	mRNA	336	30.655	266	96.7607
PCM1	mRNA	1673	37.87	265	96.3969
AIM9	mRNA	1883	35.97	265	96.3969
POB3	mRNA	1658	37.89	265	96.3969
HEM12	mRNA	1088	39.69	265	96.3969
GAS2	mRNA	1667	46.125	264	96.0332
MRPL27	mRNA	440	38.125	264	96.0332
MRPL22	mRNA	929	42.175	264	96.0332
YAR1	mRNA	602	35.595	264	96.0332
CLU1	mRNA	3833	35.165	264	96.0332
MIS1	mRNA	2927	31.025	264	96.0332
PIR3	mRNA	977	40.795	264	96.0332
OXA1	mRNA	1208	42.845	264	96.0332
LRP1	mRNA	554	32.015	264	96.0332
YCK1	mRNA	1616	40.89	263	95.6694
MRPL36	mRNA	533	44.56	262	95.3057
PUS7	mRNA	2030	32.08	262	95.3057
TSL1	mRNA	3296	42.38	262	95.3057
RSM19	mRNA	275	41.84	261	94.9419
TRM112	mRNA	407	36.63	261	94.9419
TAF10	mRNA	620	36.27	261	94.9419
SPO12	mRNA	521	42.35	260	94.5781
GNP1	mRNA	1991	44.125	260	94.5781
COX14	mRNA	212	42.04	260	94.5781
GPG1	mRNA	380	37.765	260	94.5781
DAP2	mRNA	2456	41.68	260	94.5781
ARG7	mRNA	1325	37.69	259	94.2144
MNN1	mRNA	2288	46.97	259	94.2144
SRP102	mRNA	734	37.81	259	94.2144
YNL134C	mRNA	1130	42.385	258	93.8506
ERV2	mRNA	590	36.96	258	93.8506
CAF16	mRNA	869	37.47	258	93.8506
PHO81	mRNA	3536	42.245	258	93.8506
CPR8	mRNA	926	43.14	257	93.4868
HRT1	mRNA	365	44.85	257	93.4868
SDH8	mRNA	416	40.96	257	93.4868
RSA3	mRNA	662	41.63	257	93.4868
SEH1	mRNA	1049	33.92	257	93.4868
MRPS16	mRNA	365	39.35	257	93.4868
APE4	mRNA	1472	39.87	257	93.4868
TFG1	mRNA	2207	36.14	256	93.1231
SLA1	mRNA	3734	40.63	256	93.1231
HAP1	mRNA	4508	40.915	256	93.1231
RKI1	mRNA	776	33.96	256	93.1231
NAT1	mRNA	2564	39.28	256	93.1231
STE24	mRNA	1361	36.13	256	93.1231
TAT1	mRNA	1859	41.335	256	93.1231
RSM10	mRNA	611	46.67	255	92.7593
GRE3	mRNA	983	38.09	255	92.7593
RPB2	mRNA	3674	41.66	255	92.7593
APE1	mRNA	1544	36.59	255	92.7593
RPL15B	mRNA	614	37.545	254	92.3956
SUN4	mRNA	1275	50.63	254	92.3956
GIR2	mRNA	797	40.665	254	92.3956
TSC11	mRNA	4292	47.415	254	92.3956
MDG1	mRNA	1100	39.265	254	92.3956
MNN11	mRNA	1268	42.915	254	92.3956
NIP1	mRNA	2438	48.42	253	92.0318
EGT2	mRNA	3125	48	253	92.0318
APS1	mRNA	470	43.14	253	92.0318
SEC26	mRNA	2921	37.23	253	92.0318
NNR1	mRNA	740	38.165	252	91.668
COQ9	mRNA	782	41.8	252	91.668
FIG2	mRNA	4829	38.29	252	91.668
ALO1	mRNA	1580	39.21	251	91.3043
PKR1	mRNA	368	42.82	251	91.3043
EST3	mRNA	546	45.88	250	90.9405
GRH1	mRNA	1118	40.555	250	90.9405
MRPL33	mRNA	260	40.33	249	90.5767
PMU1	mRNA	887	42.04	249	90.5767
SAM35	mRNA	989	38.9	249	90.5767
COA2	mRNA	206	38.9	249	90.5767
FLC1	mRNA	2381	47.81	249	90.5767
LYS9	mRNA	1340	34.57	249	90.5767
TCB1	mRNA	3560	42.17	248	90.213
ERP6	mRNA	650	41.54	248	90.213
CUE5	mRNA	1235	37.525	248	90.213
YPF1	mRNA	1763	47.65	248	90.213
FTR1	mRNA	1214	52.225	248	90.213
BNA6	mRNA	887	37.46	247	89.8492
HMX1	mRNA	953	43.86	247	89.8492
SHE10	mRNA	1733	37.985	246	89.4855
CAR1	mRNA	1001	36.655	246	89.4855
YPQ1	mRNA	926	38.665	246	89.4855
YGK1	mRNA	647	36.63	246	89.4855
PRS5	mRNA	1490	44.275	246	89.4855
HSP78	mRNA	2435	37.79	246	89.4855
ATP11	mRNA	956	40.96	245	89.1217
YBR016W	mRNA	386	44.07	245	89.1217
UTR4	mRNA	683	38.41	245	89.1217
NUP57	mRNA	1625	35.81	245	89.1217
TIM44	mRNA	1295	41.55	245	89.1217
MRPL49	mRNA	485	43.83	245	89.1217
AIM17	mRNA	1397	46.53	245	89.1217
YLF2	mRNA	1217	33.96	245	89.1217
SRB6	mRNA	365	38.345	244	88.7579
MRP17	mRNA	395	41.845	244	88.7579
WHI2	mRNA	1460	47.135	244	88.7579
CDC34	mRNA	887	45.005	244	88.7579
PFD1	mRNA	329	41.89	244	88.7579
MMS2	mRNA	414	37.14	243	88.3942
MFA1	mRNA	110	50.26	243	88.3942
YGL242C	mRNA	545	34.58	243	88.3942
GAS3	mRNA	1574	42.115	242	88.0304
COA1	mRNA	593	43.65	242	88.0304
PBP1	mRNA	2168	40.31	242	88.0304
NPA3	mRNA	1157	34.085	242	88.0304
MYO4	mRNA	4415	38.94	242	88.0304
ALG5	mRNA	1004	40.245	242	88.0304
EIS1	mRNA	2531	42.52	241	87.6666
BXI1	mRNA	893	50.58	241	87.6666
PGC1	mRNA	965	44.31	241	87.6666
PLB1	mRNA	1994	43.54	241	87.6666
TML25	mRNA	683	37.67	241	87.6666
RPC11	mRNA	332	35.68	241	87.6666
SPC2	mRNA	536	39.23	241	87.6666
GCD1	mRNA	1736	37.565	240	87.3029
VPS60	mRNA	689	40.74	240	87.3029
ARI1	mRNA	1043	39.75	240	87.3029
DIM1	mRNA	956	38.335	240	87.3029
SQT1	mRNA	1295	30.44	240	87.3029
CLN1	mRNA	1640	50.225	240	87.3029
PDX1	mRNA	1232	38.32	239	86.9391
SDS24	mRNA	1583	42.42	239	86.9391
DRE2	mRNA	1046	39.39	239	86.9391
LSB3	mRNA	1380	36.61	239	86.9391
BCH1	mRNA	2174	36.01	238	86.5754
MSN4	mRNA	1892	50.92	238	86.5754
SLG1	mRNA	1136	42.675	238	86.5754
CMP2	mRNA	1814	43.69	238	86.5754
RBK1	mRNA	1001	46.43	238	86.5754
UTP30	mRNA	824	36.325	238	86.5754
STP4	mRNA	1472	42.36	237	86.2116
VRG4	mRNA	1013	52.73	237	86.2116
NOP12	mRNA	1379	36.82	237	86.2116
PPE1	mRNA	1202	43.89	237	86.2116
GIM5	mRNA	492	35.91	237	86.2116
MRM2	mRNA	962	40.87	237	86.2116
BIO2	mRNA	1127	40.13	237	86.2116
VMA22	mRNA	545	30.73	236	85.8478
NNT1	mRNA	785	39.185	236	85.8478
DTD1	mRNA	453	34.66	235	85.4841
MRPL9	mRNA	809	44.48	235	85.4841
PSG1	mRNA	1178	42.26	235	85.4841
SCW11	mRNA	1628	57.35	235	85.4841
CTR2	mRNA	569	41.21	235	85.4841
TFB5	mRNA	218	37.86	235	85.4841
PLB2	mRNA	2120	45.56	234	85.1203
TOA1	mRNA	860	40.87	234	85.1203
FAU1	mRNA	635	39.725	234	85.1203
CRP1	mRNA	1397	29.24	234	85.1203
MAF1	mRNA	1188	49.16	233	84.7566
TPO4	mRNA	1979	53.73	233	84.7566
ABP1	mRNA	1778	36.44	233	84.7566
COQ6	mRNA	1439	39.56	233	84.7566
RPA12	mRNA	377	35	233	84.7566
OCH1	mRNA	1442	48.59	233	84.7566
MGR2	mRNA	341	41.25	233	84.7566
SNX3	mRNA	488	39.42	233	84.7566
YKR018C	mRNA	2177	40.3	233	84.7566
INP51	mRNA	2840	36.41	233	84.7566
LYS20	mRNA	1286	37.735	232	84.3928
PRP38	mRNA	728	43.665	232	84.3928
GFD1	mRNA	566	43.535	232	84.3928
APE2	mRNA	2859	43.815	232	84.3928
YIM1	mRNA	1097	42.44	232	84.3928
XRN1	mRNA	4586	36.925	232	84.3928
MIC27	mRNA	704	41.65	231	84.029
CBS1	mRNA	689	43.96	231	84.029
HFD1	mRNA	1598	45.59	231	84.029
MTH1	mRNA	1301	55.69	231	84.029
RIE1	mRNA	2345	43.52	231	84.029
YBR137W	mRNA	539	38.62	231	84.029
ENV9	mRNA	992	40.24	231	84.029
TVP38	mRNA	1013	39.51	230	83.6653
FMP52	mRNA	695	41.43	230	83.6653
SEC18	mRNA	2276	39.435	230	83.6653
PRB1	mRNA	1907	42.12	230	83.6653
GPX2	mRNA	488	35.995	230	83.6653
CHS1	mRNA	3395	44.66	230	83.6653
DIC1	mRNA	896	36.89	230	83.6653
GOT1	mRNA	417	40.26	229	83.3015
GTT1	mRNA	704	47.16	229	83.3015
OPT1	mRNA	2399	46.45	229	83.3015
APL2	mRNA	2180	46.39	229	83.3015
YBT1	mRNA	4985	39.515	228	82.9377
TFG2	mRNA	1202	40.225	228	82.9377
MRP49	mRNA	413	45.57	228	82.9377
ASC1	mRNA	960	30.08	228	82.9377
PRS2	mRNA	956	42.27	228	82.9377
ANP1	mRNA	1502	37.36	227	82.574
MSC7	mRNA	1934	40.35	226	82.2102
TOM71	mRNA	1919	40.68	226	82.2102
VPS25	mRNA	608	42.515	226	82.2102
TSR2	mRNA	617	38.84	226	82.2102
VCX1	mRNA	1235	43.545	226	82.2102
TLG1	mRNA	674	41.935	226	82.2102
DLD1	mRNA	1763	37.92	225	81.8465
KRE28	mRNA	1157	43.63	225	81.8465
GET2	mRNA	857	42.55	225	81.8465
UBP16	mRNA	1499	45.32	225	81.8465
YOR131C	mRNA	656	38.325	224	81.4827
PGM1	mRNA	1712	33.185	224	81.4827
RPN9	mRNA	1181	36.55	223	81.1189
YBL036C	mRNA	773	38.96	223	81.1189
HCH1	mRNA	461	49.78	223	81.1189
SME1	mRNA	284	37.995	222	80.7552
SPF1	mRNA	3647	41.36	222	80.7552
URE2	mRNA	1064	41.84	222	80.7552
ERP5	mRNA	638	45.3	222	80.7552
SVP26	mRNA	686	44.4	222	80.7552
TPS3	mRNA	3164	46.52	221	80.3914
MSS116	mRNA	1994	45.42	221	80.3914
YBL029C-A	mRNA	284	40.68	221	80.3914
MRPL10	mRNA	968	42.94	221	80.3914
HEM15	mRNA	1181	43.55	221	80.3914
ASH1	mRNA	1766	44.56	221	80.3914
GCN3	mRNA	917	39.92	221	80.3914
ERV1	mRNA	570	36.32	221	80.3914
SEC24	mRNA	2780	39.26	221	80.3914
ERG8	mRNA	1355	38.655	220	80.0276
SFK1	mRNA	1061	54.23	220	80.0276
TIM9	mRNA	263	39.26	220	80.0276
MRPL8	mRNA	716	38.05	220	80.0276
SSA4	mRNA	1928	43.735	220	80.0276
POP8	mRNA	402	39.63	220	80.0276
GCY1	mRNA	938	37.645	220	80.0276
RRP45	mRNA	917	42.02	220	80.0276
RRP46	mRNA	671	43.835	220	80.0276
FCF2	mRNA	653	42.08	219	79.6639
MTR2	mRNA	568	42.82	219	79.6639
IDP1	mRNA	1286	53.37	219	79.6639
MRPL16	mRNA	698	43.165	218	79.3001
CBP6	mRNA	488	46.83	218	79.3001
QRI1	mRNA	1433	38.33	218	79.3001
YME1	mRNA	2243	46.69	218	79.3001
OAC1	mRNA	974	40.06	217	78.9364
HAL5	mRNA	2567	38.89	217	78.9364
YFH1	mRNA	524	38.91	217	78.9364
RRP15	mRNA	752	35.3	217	78.9364
YPR147C	mRNA	914	38.87	217	78.9364
RLI1	mRNA	1826	44.11	217	78.9364
DGK1	mRNA	872	40.67	217	78.9364
TUM1	mRNA	914	32.62	217	78.9364
TRM82	mRNA	1334	35.67	216	78.5726
TPK2	mRNA	1142	43.805	216	78.5726
NVJ2	mRNA	2312	38.13	216	78.5726
RTG2	mRNA	1766	37	216	78.5726
SRP101	mRNA	1865	40.89	216	78.5726
MAG1	mRNA	890	53.35	215	78.2088
DIB1	mRNA	431	39	215	78.2088
APM4	mRNA	1475	45.58	215	78.2088
HOT13	mRNA	350	35.85	215	78.2088
TIM21	mRNA	719	43.1	215	78.2088
RRP43	mRNA	1184	41.83	215	78.2088
EDC2	mRNA	437	46.69	214	77.8451
CSM1	mRNA	572	32.215	214	77.8451
UBC9	mRNA	474	37.77	214	77.8451
REX2	mRNA	809	37.565	214	77.8451
NMT1	mRNA	1367	40.145	214	77.8451
NPL6	mRNA	1307	38.98	214	77.8451
MTC4	mRNA	2084	44.97	213	77.4813
KRE6	mRNA	2162	50.95	213	77.4813
ADP1	mRNA	3149	47.46	213	77.4813
AAH1	mRNA	1043	29.92	213	77.4813
VPS17	mRNA	1655	38.59	213	77.4813
LEU9	mRNA	1814	36.15	213	77.4813
PPN1	mRNA	2024	35.77	213	77.4813
ENT2	mRNA	1841	35.67	212	77.1175
GNT1	mRNA	1475	43.955	212	77.1175
TRS33	mRNA	806	42.525	212	77.1175
AME1	mRNA	974	40.665	212	77.1175
BET3	mRNA	581	46.505	212	77.1175
REH1	mRNA	1298	41.64	212	77.1175
SLA2	mRNA	2906	42.54	211	76.7538
MCM1	mRNA	860	36.08	211	76.7538
TIM54	mRNA	1436	42.52	211	76.7538
ENA1	mRNA	3275	45.18	211	76.7538
CSI2	mRNA	1025	48.03	211	76.7538
IES4	mRNA	350	39.74	211	76.7538
GPA1	mRNA	1418	43.895	210	76.39
SRB7	mRNA	422	45.345	210	76.39
RNR1	mRNA	2666	53.28	210	76.39
HLJ1	mRNA	674	43.205	210	76.39
PIN3	mRNA	647	49.455	210	76.39
YIP1	mRNA	746	43.405	210	76.39
PRP42	mRNA	1634	44.49	210	76.39
RET2	mRNA	1640	35.74	209	76.0263
MRPS17	mRNA	713	44.48	209	76.0263
SNF11	mRNA	509	49.68	209	76.0263
RTF1	mRNA	1676	38.24	209	76.0263
TRP3	mRNA	1454	38.03	209	76.0263
SFH5	mRNA	884	33.83	209	76.0263
ABP140	mRNA	1887	34.68	208	75.6625
SCM4	mRNA	563	40.385	208	75.6625
DEF1	mRNA	2216	37.96	208	75.6625
NUP49	mRNA	1418	41.17	208	75.6625
PEP12	mRNA	866	41.655	208	75.6625
MIC60	mRNA	1622	41.68	208	75.6625
CHS7	mRNA	950	44.79	208	75.6625
YGL039W	mRNA	1046	46.55	208	75.6625
ATG8	mRNA	353	39.67	207	75.2987
FMP46	mRNA	401	40.96	207	75.2987
TMA16	mRNA	536	29.33	207	75.2987
MRPL17	mRNA	845	46.17	207	75.2987
MIC12	mRNA	320	39.35	207	75.2987
AGA2	mRNA	263	47.69	207	75.2987
HNM1	mRNA	1691	50.37	207	75.2987
TWF1	mRNA	998	43.62	207	75.2987
PSE1	mRNA	3269	44.41	207	75.2987
MSS51	mRNA	1310	47.265	206	74.935
PRM5	mRNA	956	48.445	206	74.935
GRX8	mRNA	329	41.245	206	74.935
JIP5	mRNA	1478	44.675	206	74.935
PNP1	mRNA	935	39.21	206	74.935
SER2	mRNA	929	41.13	206	74.935
BET1	mRNA	429	38.02	206	74.935
NOP4	mRNA	2057	36.48	205	74.5712
RRS1	mRNA	611	31.22	205	74.5712
MRPS8	mRNA	467	43.4	205	74.5712
VPS70	mRNA	2435	42	205	74.5712
TPO2	mRNA	1844	45.72	205	74.5712
CPT1	mRNA	1182	44.59	205	74.5712
ISN1	mRNA	1352	40.88	205	74.5712
ERJ5	mRNA	887	38.04	205	74.5712
YJL068C	mRNA	899	40.29	205	74.5712
SRM1	mRNA	1448	35.43	204	74.2075
RCH1	mRNA	1304	46.72	204	74.2075
EHT1	mRNA	1355	45.24	204	74.2075
YIF1	mRNA	944	40.15	203	73.8437
SPC3	mRNA	554	40.65	203	73.8437
MRPL13	mRNA	794	42.48	203	73.8437
RFA2	mRNA	822	43.08	203	73.8437
DOA1	mRNA	2147	42.73	203	73.8437
DCS1	mRNA	1052	45.81	203	73.8437
AKR1	mRNA	2294	47	203	73.8437
EAF6	mRNA	341	43.45	203	73.8437
PHO89	mRNA	1724	47.47	203	73.8437
IZH4	mRNA	938	47.76	203	73.8437
LOA1	mRNA	902	35.37	203	73.8437
SRP40	mRNA	1220	35.465	202	73.4799
SPT15	mRNA	722	38.38	202	73.4799
AHA1	mRNA	1052	35.46	202	73.4799
MAM33	mRNA	800	48.395	202	73.4799
YHR138C	mRNA	344	41.99	202	73.4799
MPD2	mRNA	833	42.085	202	73.4799
COA4	mRNA	452	41.18	202	73.4799
HST2	mRNA	1073	42.515	202	73.4799
SSE2	mRNA	2081	39.335	202	73.4799
ENT1	mRNA	1364	41.72	201	73.1162
PUF6	mRNA	1970	37.5	201	73.1162
TGL1	mRNA	1646	39.75	201	73.1162
FUN14	mRNA	596	40.54	201	73.1162
CAT5	mRNA	701	41.88	201	73.1162
SYH1	mRNA	2549	43.5	201	73.1162
BUD21	mRNA	644	41.49	200	72.7524
RRP17	mRNA	707	42.06	200	72.7524
BDF1	mRNA	2060	44.465	200	72.7524
BCS1	mRNA	1370	47.545	200	72.7524
PMC1	mRNA	3521	44.385	200	72.7524
DCP1	mRNA	695	43.265	200	72.7524
IMG1	mRNA	509	39.545	200	72.7524
STO1	mRNA	2586	43.5	200	72.7524
YNR061C	mRNA	659	41.77	199	72.3886
YOR342C	mRNA	959	46.44	199	72.3886
NOP53	mRNA	1367	35.22	199	72.3886
MID2	mRNA	1130	49.44	199	72.3886
EEB1	mRNA	1370	47.69	199	72.3886
NOT5	mRNA	1682	43.28	199	72.3886
PTC2	mRNA	1394	38.77	199	72.3886
SKI6	mRNA	740	43.705	198	72.0249
MRPL1	mRNA	857	45.94	198	72.0249
ADI1	mRNA	539	39.855	198	72.0249
AVT1	mRNA	1808	37.545	198	72.0249
PCS60	mRNA	1631	37.75	198	72.0249
SMX3	mRNA	260	36.775	198	72.0249
KTR6	mRNA	1340	41.8	197	71.6611
EMI1	mRNA	563	39.86	197	71.6611
PWP1	mRNA	1730	33.73	197	71.6611
CRM1	mRNA	3254	38.96	197	71.6611
YDR514C	mRNA	1451	38.61	197	71.6611
BUD32	mRNA	785	43	197	71.6611
FAP7	mRNA	593	38.04	197	71.6611
KEI1	mRNA	666	34.45	197	71.6611
NHP10	mRNA	611	39.08	197	71.6611
ISU2	mRNA	470	46.54	197	71.6611
RSC8	mRNA	1673	32.55	196	71.2974
BNA1	mRNA	533	46.255	196	71.2974
ROX3	mRNA	662	43.755	196	71.2974
MHR1	mRNA	680	39.39	196	71.2974
CSE1	mRNA	2882	45.925	196	71.2974
POL5	mRNA	3068	43.57	196	71.2974
NRG2	mRNA	662	49.195	196	71.2974
GRS2	mRNA	1856	31	196	71.2974
NDI1	mRNA	1541	47.97	195	70.9336
CBP4	mRNA	512	34.97	195	70.9336
HIS7	mRNA	1658	40.55	195	70.9336
SFB3	mRNA	2789	42.07	195	70.9336
CWH41	mRNA	2501	37.71	194	70.5698
TGL4	mRNA	2732	46.82	194	70.5698
PTR2	mRNA	1805	56.195	194	70.5698
HSK3	mRNA	209	35.96	193	70.2061
CKA1	mRNA	1118	44.1	193	70.2061
RBG1	mRNA	1109	33.1	193	70.2061
RRP14	mRNA	1304	37.67	193	70.2061
SOL2	mRNA	947	37.67	193	70.2061
GRX7	mRNA	611	37.48	193	70.2061
ITR2	mRNA	1829	41.61	193	70.2061
HSE1	mRNA	1358	46.96	193	70.2061
ALG6	mRNA	1634	44.33	193	70.2061
SIC1	mRNA	854	47.58	193	70.2061
YML018C	mRNA	1181	47.25	193	70.2061
SPP2	mRNA	557	44.32	192	69.8423
SKT5	mRNA	2090	43.28	192	69.8423
UFD1	mRNA	1085	47.1	192	69.8423
SYS1	mRNA	611	44.8	192	69.8423
CMK1	mRNA	1340	47.64	192	69.8423
AIM20	mRNA	614	45.48	191	69.4785
BRE1	mRNA	2102	45.63	191	69.4785
CYT2	mRNA	674	50.4	191	69.4785
SPT6	mRNA	4355	43.96	191	69.4785
PTK2	mRNA	2456	40.14	191	69.4785
CWC25	mRNA	539	41.7	191	69.4785
CUE4	mRNA	353	33.58	191	69.4785
MDE1	mRNA	734	33.87	191	69.4785
BUG1	mRNA	1025	41.11	191	69.4785
PML39	mRNA	1004	43.77	191	69.4785
CDS1	mRNA	1373	45.65	191	69.4785
UTP11	mRNA	752	42.52	190	69.1148
PEX19	mRNA	1028	49.645	190	69.1148
UCC1	mRNA	1109	47.875	190	69.1148
PEX2	mRNA	815	42.055	190	69.1148
NUS1	mRNA	1127	40.975	190	69.1148
SNF6	mRNA	998	46.46	190	69.1148
PDE1	mRNA	1109	45.04	189	68.751
RNQ1	mRNA	1217	36.61	189	68.751
SOL4	mRNA	767	33.22	189	68.751
VHR2	mRNA	1517	49.38	189	68.751
BAR1	mRNA	1763	51.61	189	68.751
PBP4	mRNA	557	44	189	68.751
APM3	mRNA	1451	43.68	189	68.751
CLB1	mRNA	1415	47.85	189	68.751
EMP70	mRNA	2003	44.57	189	68.751
RRP5	mRNA	5189	33.88	189	68.751
AIM24	mRNA	1184	37.76	188	68.3873
GPI17	mRNA	1604	36.575	188	68.3873
EDE1	mRNA	4145	48.355	188	68.3873
ALB1	mRNA	527	37.96	188	68.3873
TSA2	mRNA	590	41.14	188	68.3873
COQ1	mRNA	1421	44.545	188	68.3873
NOC2	mRNA	2132	41.825	188	68.3873
SEC27	mRNA	2670	41.795	188	68.3873
TPN1	mRNA	1739	49.73	187	68.0235
MIM2	mRNA	263	34.65	187	68.0235
PMT4	mRNA	2288	40.27	187	68.0235
RCN2	mRNA	797	42	187	68.0235
YJR142W	mRNA	1028	38	187	68.0235
SWS2	mRNA	431	44.7	187	68.0235
RRP42	mRNA	797	44.73	187	68.0235
TAP42	mRNA	1100	47.36	187	68.0235
DIG1	mRNA	1358	45.33	186	67.6597
EDC3	mRNA	1655	46.215	186	67.6597
MRPL32	mRNA	551	42.425	186	67.6597
RXT3	mRNA	884	41.665	186	67.6597
ISA1	mRNA	752	44.685	186	67.6597
VPS4	mRNA	1313	32.91	186	67.6597
RAS1	mRNA	929	42.5	186	67.6597
ACH1	mRNA	1580	38.75	186	67.6597
COS5	mRNA	1151	44	185	67.296
HSP31	mRNA	713	50.25	185	67.296
RPA14	mRNA	413	43.04	185	67.296
RPA43	mRNA	980	34.33	185	67.296
CMC2	mRNA	330	47.8	185	67.296
NOP13	mRNA	1211	35.17	185	67.296
GLG1	mRNA	1850	37.8	184	66.9322
IES6	mRNA	500	42.435	184	66.9322
MPP10	mRNA	1781	36.555	184	66.9322
ERP4	mRNA	623	46.375	184	66.9322
AFG1	mRNA	1529	38.95	184	66.9322
YNL122C	mRNA	347	41.615	184	66.9322
MAK3	mRNA	530	38.66	184	66.9322
[truncated: 3,381 more rows]

## Sheet: PolyA_3
Feature name	Feature type	Feature length	Feature median tail length	number of reads	RPM
tL_28UAA_29D	tRNA	83	49.26	48	25.9684
tD_28GUC_29N	tRNA	70	54.04	39	21.0993
tRNA-Phe	tRNA	804	42.475	34	18.3943
tA_28UGC_29O	tRNA	72	43.27	30	16.2303
tP_28UGG_29O1	tRNA	72	45.515	22	11.9022
tK_28CUU_29C	tRNA	72	47.285	20	10.8202
tV_28AAC_29O	tRNA	73	60.365	18	9.73815
tK_28UUU_29P	tRNA	73	34.625	14	7.57412
tK_28UUU_29L	tRNA	73	51.97	12	6.4921
tV_28AAC_29G3	tRNA	73	40.03	11	5.95109
tL_28UAG_29L1	tRNA	82	47.855	10	5.41008
tH_28GUG_29E2	tRNA	71	36.705	10	5.41008
tN_28GUU_29P	tRNA	73	45.57	9	4.86908
tH_28GUG_29E1	tRNA	71	60.31	7	3.78706
SUF7	tRNA	72	57.72	6	3.24605
tL_28CAA_29L	tRNA	82	51.4	6	3.24605
tD_28GUC_29G1	tRNA	71	46.3	5	2.70504
tE_28UUC_29E2	tRNA	71	55.2	5	2.70504
SOE1	tRNA	71	83.33	5	2.70504
tG_28GCC_29D2	tRNA	70	38.48	5	2.70504
tP_28UGG_29N1	tRNA	72	44.74	5	2.70504
tD_28GUC_29O	tRNA	71	38.21	5	2.70504
tD_28GUC_29D	tRNA	71	42.35	5	2.70504
SUF5	tRNA	71	56.15	5	2.70504
tV_28AAC_29M2	tRNA	73	39.88	5	2.70504
tD_28GUC_29G2	tRNA	71	60.705	4	2.16403
tP_28UGG_29L	tRNA	72	55.47	4	2.16403
tM_28CAU_29C	tRNA	71	55.39	4	2.16403
tK_28CUU_29M	tRNA	72	46.39	4	2.16403
tE_28UUC_29J	tRNA	71	66.325	4	2.16403
SUF1	tRNA	71	32.115	4	2.16403
tK_28CUU_29E1	tRNA	72	33.7	4	2.16403
tE_28UUC_29G2	tRNA	71	49.61	4	2.16403
SUP2	tRNA	75	62.23	3	1.62303
tL_28UAG_29L2	tRNA	82	50.81	3	1.62303
tA_28AGC_29H	tRNA	72	30.68	3	1.62303
SUP5	tRNA	75	49.28	3	1.62303
tL_28CAA_29N	tRNA	82	59.73	3	1.62303
tR_28UCU_29K	tRNA	71	45.3	3	1.62303
EMT2	tRNA	72	44.23	3	1.62303
EMT4	tRNA	72	51.25	3	1.62303
tK_28CUU_29P	tRNA	72	17.48	3	1.62303
tG_28GCC_29P2	tRNA	70	51.63	3	1.62303
tI_28AAU_29P2	tRNA	73	37.59	3	1.62303
TGA1	tRNA	72	43.04	3	1.62303
tH_28GUG_29G1	tRNA	71	63.47	3	1.62303
SUP19	tRNA	81	68.36	3	1.62303
tI_28AAU_29G	tRNA	73	35.67	3	1.62303
SUF8	tRNA	72	57.35	3	1.62303
tK_28UUU_29D	tRNA	73	48.515	2	1.08202
TRN1	tRNA	72	33.8	2	1.08202
tQ_28UUG_29C	tRNA	71	31.16	2	1.08202
tL_28GAG_29G	tRNA	81	51.075	2	1.08202
tT_28UGU_29P	tRNA	71	45.31	2	1.08202
tD_28GUC_29J1	tRNA	71	24.45	2	1.08202
SUF10	tRNA	71	31.855	2	1.08202
tK_28UUU_29G2	tRNA	73	23.79	2	1.08202
tV_28AAC_29G1	tRNA	73	33.2	2	1.08202
tW_28CCA_29G1	tRNA	72	42.1	2	1.08202
tX_28XXX_29D	tRNA	99	61.32	2	1.08202
tC_28GCA_29P2	tRNA	71	27.71	2	1.08202
tD_28GUC_29M	tRNA	71	58.885	2	1.08202
tE_28UUC_29I	tRNA	71	61.405	2	1.08202
tN_28GUU_29F	tRNA	73	60.04	2	1.08202
tS_28AGA_29L	tRNA	81	39.305	2	1.08202
tT_28AGU_29C	tRNA	72	62.155	2	1.08202
tT_28AGU_29H	tRNA	72	53.98	2	1.08202
tR_28UCU_29G3	tRNA	71	54.76	2	1.08202
tR_28UCU_29G2	tRNA	71	95.185	2	1.08202
tL_28UAA_29N	tRNA	83	38.24	2	1.08202
SUP16	tRNA	81	36.575	2	1.08202
SUP17	tRNA	81	41.27	2	1.08202
TRR4	tRNA	71	42.72	2	1.08202
tK_28CUU_29D1	tRNA	72	30.52	2	1.08202
tT_28AGU_29N2	tRNA	72	50.71	2	1.08202
tN_28GUU_29K	tRNA	73	43.84	2	1.08202
tN_28GUU_29L	tRNA	73	51.66	2	1.08202
tR_28UCU_29M1	tRNA	71	69.355	2	1.08202
tT_28AGU_29I1	tRNA	72	49.46	1	0.541008
TRT2	tRNA	71	62.37	1	0.541008
tN_28GUU_29G	tRNA	73	44.89	1	0.541008
tT_28AGU_29N1	tRNA	72	94.22	1	0.541008
tV_28UAC_29B	tRNA	73	34.11	1	0.541008
tW_28CCA_29P	tRNA	72	44.77	1	0.541008
tE_28UUC_29E1	tRNA	71	68.42	1	0.541008
tD_28GUC_29I1	tRNA	71	38.68	1	0.541008
tW_28CCA_29G2	tRNA	72	15.48	1	0.541008
tA_28AGC_29M1	tRNA	72	44.92	1	0.541008
tA_28AGC_29L	tRNA	72	36.04	1	0.541008
tE_28UUC_29K	tRNA	71	39.92	1	0.541008
tT_28AGU_29J	tRNA	72	59.64	1	0.541008
tH_28GUG_29G2	tRNA	71	35.86	1	0.541008
tA_28AGC_29P	tRNA	72	33.8	1	0.541008
tA_28UGC_29E	tRNA	72	29.73	1	0.541008
tA_28UGC_29G	tRNA	72	72.52	1	0.541008
tL_28CAA_29D	tRNA	82	58.13	1	0.541008
tL_28UAA_29B2	tRNA	83	25.98	1	0.541008
EMT3	tRNA	72	65.55	1	0.541008
tV_28AAC_29E2	tRNA	73	54	1	0.541008
tC_28GCA_29P1	tRNA	71	26.86	1	0.541008
tV_28AAC_29K2	tRNA	73	61.96	1	0.541008
tE_28UUC_29C	tRNA	71	77.04	1	0.541008
tP_28UGG_29O3	tRNA	72	55.62	1	0.541008
tR_28ACG_29O	tRNA	72	41.34	1	0.541008
tT_28AGU_29B	tRNA	72	61.42	1	0.541008
tT_28AGU_29D	tRNA	72	85.45	1	0.541008
tG_28GCC_29G2	tRNA	70	36.5	1	0.541008
tP_28UGG_29N2	tRNA	72	29.92	1	0.541008
tT_28AGU_29O1	tRNA	72	81.85	1	0.541008
tE_28UUC_29M	tRNA	71	70.83	1	0.541008
tV_28AAC_29L	tRNA	73	68.57	1	0.541008
tE_28UUC_29P	tRNA	71	113.11	1	0.541008
tS_28AGA_29J	tRNA	81	57.81	1	0.541008
tX_28XXX_29L	tRNA	80	56.04	1	0.541008
tS_28AGA_29G	tRNA	81	54.51	1	0.541008
tD_28GUC_29B	tRNA	71	57.41	1	0.541008
tA_28AGC_29M2	tRNA	72	42.61	1	0.541008
tI_28UAU_29D	tRNA	73	31.44	1	0.541008
tN_28GUU_29O2	tRNA	73	41.52	1	0.541008
tT_28AGU_29O2	tRNA	72	47.72	1	0.541008
tI_28AAU_29N1	tRNA	73	49.39	1	0.541008
tS_28AGA_29E	tRNA	81	18.03	1	0.541008
SUF6	tRNA	71	22.59	1	0.541008
SUP51	tRNA	83	69.7	1	0.541008
tK_28CUU_29E2	tRNA	72	55.67	1	0.541008
tA_28AGC_29G	tRNA	72	66.92	1	0.541008
SUP54	tRNA	82	45.04	1	0.541008
tI_28AAU_29E1	tRNA	73	85.38	1	0.541008
tE_28UUC_29G3	tRNA	71	35.25	1	0.541008
SUF17	tRNA	70	58.21	1	0.541008
gag-pol_20fusion_20protein	transposable_element	217730	36.56	6907	3736.75
gag_20protein	transposable_element	53095	39.18	1058	572.387
YOR343C-B	transposable_element	5313	44.92	556	300.801
TY2B_B	transposable_element	5313	59.79	3	1.62303
YARCTyB1-1	transposable_element	3590	43.21	3	1.62303
YARCTyA1-1	transposable_element	1322	25.74	2	1.08202
YDR210W-D	transposable_element	5268	32.68	2	1.08202
TLC1	telomerase_RNA	1300	66.52	97	52.4778
LSR1	snRNA	1174	50.65	62	33.5425
SNR19	snRNA	567	50.96	15	8.11513
SNR14	snRNA	159	56.38	7	3.78706
SNR24	snoRNA	88	29.605	5206	2816.49
SNR18	snoRNA	101	34.79	4202	2273.32
SNR39	snoRNA	88	31.25	2681	1450.44
SNR59	snoRNA	77	31.845	1970	1065.79
SNR38	snoRNA	94	33.98	1626	879.68
SNR44	snoRNA	210	37.31	1547	836.94
SNR43	snoRNA	208	38.43	257	139.039
SNR84	snoRNA	549	49.71	145	78.4462
SNR191	snoRNA	273	55.83	132	71.4131
SNR33	snoRNA	182	48.895	94	50.8548
SNR4	snoRNA	185	40.69	89	48.1498
SNR63	snoRNA	254	35.61	73	39.4936
SNR86	snoRNA	1003	54.605	70	37.8706
SNR49	snoRNA	164	58.355	60	32.4605
SNR9	snoRNA	186	43.305	52	28.1324
SNR42	snoRNA	350	53.29	51	27.5914
SNR57	snoRNA	87	50.29	49	26.5094
SNR17B	snoRNA	332	40.47	43	23.2634
SNR41	snoRNA	94	49.07	42	22.7224
SNR30	snoRNA	605	57.16	41	22.1813
SNR31	snoRNA	224	51.14	33	17.8533
SNR37	snoRNA	385	53.11	30	16.2303
SNR82	snoRNA	267	58.7	29	15.6892
SNR34	snoRNA	202	65.72	29	15.6892
SNR83	snoRNA	305	76.91	28	15.1482
SNR75	snoRNA	88	41.88	27	14.6072
SNR10	snoRNA	244	51.37	27	14.6072
SNR87	snoRNA	108	37.705	24	12.9842
SNR35	snoRNA	203	44.04	23	12.4432
SNR8	snoRNA	189	59.77	21	11.3612
SNR69	snoRNA	100	51.77	19	10.2792
SNR67	snoRNA	81	39.635	18	9.73815
SNR32	snoRNA	187	53.84	18	9.73815
SNR36	snoRNA	181	40.62	17	9.19714
SNR11	snoRNA	257	62.48	16	8.65614
SNR68	snoRNA	135	61.87	15	8.11513
SNR128	snoRNA	125	57.52	15	8.11513
NME1	snoRNA	339	38.25	12	6.4921
SNR47	snoRNA	98	46.955	12	6.4921
SNR50	snoRNA	89	45.28	11	5.95109
SNR40	snoRNA	96	52.21	11	5.95109
SNR5	snoRNA	203	52.895	10	5.41008
SNR58	snoRNA	95	42.785	10	5.41008
SNR60	snoRNA	103	36.04	9	4.86908
SNR62	snoRNA	99	41.8	8	4.32807
SNR66	snoRNA	85	35.86	8	4.32807
SNR13	snoRNA	123	63.54	8	4.32807
SNR39B	snoRNA	95	66.79	7	3.78706
SNR65	snoRNA	99	66.665	6	3.24605
SNR81	snoRNA	200	52.07	5	2.70504
SNR80	snoRNA	170	30.72	5	2.70504
SNR56	snoRNA	87	65.2	5	2.70504
SNR61	snoRNA	89	69.34	5	2.70504
SNR70	snoRNA	163	45.71	5	2.70504
SNR45	snoRNA	171	69.455	4	2.16403
SNR72	snoRNA	97	27.195	4	2.16403
SNR77	snoRNA	87	39.755	4	2.16403
SNR189	snoRNA	188	38.21	3	1.62303
SNR48	snoRNA	112	51.73	3	1.62303
SNR17A	snoRNA	333	57.04	3	1.62303
SNR53	snoRNA	90	22.05	2	1.08202
SNR71	snoRNA	89	43.735	2	1.08202
SNR161	snoRNA	160	76.99	2	1.08202
SNR85	snoRNA	170	66.105	2	1.08202
SNR51	snoRNA	106	45.62	1	0.541008
SNR190	snoRNA	189	27.54	1	0.541008
SNR52	snoRNA	91	53.81	1	0.541008
SNR73	snoRNA	105	24.48	1	0.541008
SNR78	snoRNA	86	46.58	1	0.541008
SNR76	snoRNA	108	25.39	1	0.541008
RDN25-2	rRNA	3395	38.155	240	129.842
ETS1-2	rRNA	699	41.33	107	57.8879
RDN58-2	rRNA	157	41.595	42	22.7224
NTS2-2	rRNA	1242	47.965	38	20.5583
RDN18-2	rRNA	1799	44.18	33	17.8533
RDN5-2	rRNA	118	28.45	31	16.7713
ITS1-2	rRNA	0	44.92	28	15.1482
RDN5-6	rRNA	120	56.1	10	5.41008
NTS2-1	rRNA	1242	41.6	6	3.24605
NTS1-2	rRNA	914	73.37	6	3.24605
RDN37-2	rRNA	6266	32.65	2	1.08202
RDN5-5	rRNA	118	66.975	2	1.08202
RDN37-1	rRNA	6266	70.82	1	0.541008
RUF20	ncRNA	442	35.98	448	242.372
RUF21	ncRNA	706	31.13	440	238.044
SRG1	ncRNA	550	50.21	77	41.6576
IRT1	ncRNA	1488	51	39	21.0993
SCR1	ncRNA	521	29.58	17	9.19714
RME3	ncRNA	1904	60.18	15	8.11513
RUF5-1	ncRNA	709	36.12	14	7.57412
ICR1	ncRNA	3198	55.57	7	3.78706
RUF5-2	ncRNA	709	56.23	6	3.24605
RUF23	ncRNA	253	41.035	4	2.16403
RPR1	ncRNA	368	41.93	3	1.62303
RUF22	ncRNA	514	44.365	2	1.08202
RME2	ncRNA	2222	61.43	2	1.08202
PWR1	ncRNA	940	61.555	2	1.08202
TDH2	mRNA	998	37.71	28694	15523.7
FBA1	mRNA	1079	34.19	27795	15037.3
TEF1	mRNA	1376	29.24	27433	14841.5
ENO2	mRNA	1313	33.35	21826	11808.1
RPS31	mRNA	458	30.37	21816	11802.6
GPM1	mRNA	743	34.19	20887	11300
ADH1	mRNA	1046	35.67	19927	10780.7
TDH3	mRNA	998	35.87	17002	9198.23
PDC1	mRNA	1691	31	13952	7548.15
RPS12	mRNA	431	27.61	13819	7476.2
CCW12	mRNA	401	39.37	13439	7270.61
TPI1	mRNA	746	35.845	13084	7078.55
CDC19	mRNA	1502	34.9	12661	6849.71
RPS8B	mRNA	610	29.54	11169	6042.52
RPL28	mRNA	450	28.58	10605	5737.39
PGK1	mRNA	1250	35.96	10258	5549.66
RPL25	mRNA	429	27.785	9872	5340.84
RPL1A	mRNA	653	33.68	8568	4635.36
RPL30	mRNA	318	31.04	8452	4572.6
RPS20	mRNA	365	28.5	8402	4545.55
RPS25A	mRNA	342	32.17	8274	4476.3
ENO1	mRNA	1313	38.84	8243	4459.53
RPS3	mRNA	722	31	8080	4371.35
RPS23B	mRNA	438	27.96	8031	4344.84
RPS4A	mRNA	786	28.38	7950	4301.02
RPL38	mRNA	236	30.835	7868	4256.65
RPS26A	mRNA	370	29.19	7746	4190.65
RPS6A	mRNA	711	28.39	7493	4053.78
RPS5	mRNA	677	29.24	7471	4041.87
TMA19	mRNA	503	32.16	7313	3956.39
RPS2	mRNA	764	27.55	7272	3934.21
RPL36B	mRNA	303	30.38	7268	3932.05
RPL40A	mRNA	387	28.67	7195	3892.56
RPL31A	mRNA	342	26.68	7187	3888.23
RPL32	mRNA	393	28.35	7154	3870.37
RPL14A	mRNA	417	29.52	7038	3807.62
RPL23B	mRNA	414	27.36	7009	3791.93
RPL35B	mRNA	363	29.44	6995	3784.35
RPS30A	mRNA	192	33.76	6961	3765.96
RPS14A	mRNA	414	29.725	6950	3760.01
RPL42A	mRNA	321	28.21	6786	3671.28
RPL43A	mRNA	279	28.8	6710	3630.17
RPS24A	mRNA	408	26.36	6705	3627.46
RPL3	mRNA	1163	33.43	6639	3591.76
RPL9A	mRNA	575	28.78	6577	3558.21
RPS9B	mRNA	588	27.805	6406	3465.7
RPS28A	mRNA	203	29.38	6397	3460.83
RPL26B	mRNA	384	31.04	6314	3415.93
RPL27A	mRNA	411	27.58	6299	3407.81
RPS13	mRNA	456	27.45	6197	3352.63
RPL11A	mRNA	524	28.205	6172	3339.1
RPP1A	mRNA	320	28.67	6045	3270.4
RPS15	mRNA	428	30.52	6042	3268.77
RPL18A	mRNA	561	28.84	6034	3264.44
RPS22A	mRNA	392	32.25	5997	3244.43
RPS1B	mRNA	767	25.985	5966	3227.66
RPL13B	mRNA	600	29.26	5903	3193.57
CWP2	mRNA	278	40.04	5889	3186
RPL4B	mRNA	1088	34.35	5880	3181.13
RPL34B	mRNA	366	28.29	5873	3177.34
RPS21A	mRNA	264	34.79	5872	3176.8
RPL10	mRNA	665	37	5860	3170.31
HOR7	mRNA	179	37	5856	3168.15
RPS7A	mRNA	573	27.37	5796	3135.68
RPL12B	mRNA	497	28.04	5729	3099.44
RPS10A	mRNA	318	34.84	5704	3085.91
RPL19B	mRNA	570	30	5560	3008.01
RPL40B	mRNA	387	33.52	5447	2946.87
RPL2A	mRNA	765	25.69	5424	2934.43
RPL24A	mRNA	475	30.21	5421	2932.81
RPL22A	mRNA	366	30.39	5379	2910.08
SSB2	mRNA	1841	29.52	5308	2871.67
RPP1B	mRNA	321	29.8	5286	2859.77
RPL39	mRNA	156	31.8	5184	2804.59
RPL8B	mRNA	770	30.76	5177	2800.8
RPL33A	mRNA	324	31.04	5147	2784.57
RPS18A	mRNA	441	29.92	5137	2779.16
RPL20B	mRNA	519	29.04	5098	2758.06
RPL5	mRNA	893	30.67	5071	2743.45
RPL41B	mRNA	77	37.23	5032	2722.35
RPL6A	mRNA	531	32.24	5029	2720.73
RPS19B	mRNA	435	29.83	5022	2716.94
RPL21A	mRNA	483	30.31	5002	2706.12
RPS16A	mRNA	432	30.19	4981	2694.76
RPP0	mRNA	938	30.98	4976	2692.06
RPS23A	mRNA	438	27.33	4923	2663.38
RPS1A	mRNA	767	29.96	4893	2647.15
CPR1	mRNA	488	33.27	4881	2640.66
RPS18B	mRNA	441	30.76	4881	2640.66
RPP2B	mRNA	332	28.52	4880	2640.12
RPP2A	mRNA	320	32.44	4755	2572.5
CUP1-2	mRNA	185	43.845	4668	2525.43
RPL42B	mRNA	321	30.42	4662	2522.18
RPS21B	mRNA	264	28.285	4626	2502.71
RPS17A	mRNA	411	30.28	4561	2467.54
RPL21B	mRNA	483	31.09	4542	2457.26
RPL2B	mRNA	765	28.75	4481	2424.26
RPL37A	mRNA	267	31	4420	2391.26
RPL16B	mRNA	597	30.575	4368	2363.12
STM1	mRNA	821	29.84	4306	2329.58
RPL37B	mRNA	267	34.27	4238	2292.79
RPL15A	mRNA	614	34.885	4214	2279.81
RPS30B	mRNA	192	33.68	4149	2244.64
RPL17A	mRNA	555	30.31	4104	2220.3
RPS16B	mRNA	432	30.63	4081	2207.86
RPL24B	mRNA	475	28.04	4072	2202.99
RPS10B	mRNA	318	29.32	4024	2177.02
RPL19A	mRNA	570	29.145	4014	2171.61
RPS17B	mRNA	411	30.58	3985	2155.92
RPL41A	mRNA	77	32.93	3958	2141.31
RPS26B	mRNA	360	30.815	3936	2129.41
GLN1	mRNA	1112	36.96	3908	2114.26
RPS27B	mRNA	249	30.84	3827	2070.44
RPS19A	mRNA	435	29.21	3733	2019.58
RPL20A	mRNA	519	30.105	3678	1989.83
TDH1	mRNA	998	46.075	3674	1987.67
RPL23A	mRNA	414	27.545	3658	1979.01
RPL12A	mRNA	497	32.56	3653	1976.3
HHT2	mRNA	410	39.88	3608	1951.96
TSA1	mRNA	590	33.24	3574	1933.56
RPL34A	mRNA	366	28.15	3541	1915.71
RPL43B	mRNA	279	29.06	3515	1901.64
RPL29	mRNA	183	29.1	3437	1859.45
RPS0A	mRNA	759	28.65	3275	1771.8
EFT1	mRNA	2528	33.49	3156	1707.42
RPS11B	mRNA	471	31.82	3137	1697.14
ZEO1	mRNA	341	38.65	3127	1691.73
SOD1	mRNA	464	29.32	3053	1651.7
RPS11A	mRNA	471	28.26	3051	1650.62
ACT1	mRNA	1128	34.35	3024	1636.01
NKP1	mRNA	716	28.12	3021	1634.39
HTA2	mRNA	398	32.615	2970	1606.8
HTA1	mRNA	398	38.96	2951	1596.52
RPL16A	mRNA	600	30.555	2934	1587.32
PGI1	mRNA	1664	33.98	2874	1554.86
TIF1	mRNA	1187	32.63	2839	1535.92
GPP1	mRNA	752	31.04	2834	1533.22
EGO4	mRNA	296	39.87	2833	1532.68
RPS29B	mRNA	183	33.53	2818	1524.56
HTB1	mRNA	395	40.17	2745	1485.07
RPS29A	mRNA	176	28.8	2727	1475.33
HXK1	mRNA	1457	43.96	2723	1473.17
HXT4	mRNA	1730	40.95	2714	1468.3
RPL26A	mRNA	384	30.04	2686	1453.15
PSA1	mRNA	1085	31.58	2680	1449.9
AHP1	mRNA	530	29.355	2624	1419.61
RPS0B	mRNA	759	29.19	2620	1417.44
RPL27B	mRNA	411	32.14	2609	1411.49
STF2	mRNA	254	36.6	2577	1394.18
RPS28B	mRNA	203	35.89	2571	1390.93
ARF1	mRNA	545	29.36	2567	1388.77
SED1	mRNA	1016	48.53	2541	1374.7
EGD1	mRNA	473	31.35	2506	1355.77
RPL13A	mRNA	600	29.11	2480	1341.7
HXT6	mRNA	1712	46.325	2456	1328.72
YEF3	mRNA	3134	33.34	2454	1327.63
EGD2	mRNA	524	31.26	2453	1327.09
RPL36A	mRNA	303	26.455	2390	1293.01
RPS25B	mRNA	340	28.93	2339	1265.42
BMH1	mRNA	803	32.14	2311	1250.27
HHT1	mRNA	410	39.64	2295	1241.61
MMF1	mRNA	437	35.94	2264	1224.84
HSP150	mRNA	1241	50.55	2218	1199.96
COF1	mRNA	432	31.74	2212	1196.71
VTC1	mRNA	389	33.71	2195	1187.51
PHO84	mRNA	1763	44.895	2160	1168.58
RPL17B	mRNA	555	31.04	2159	1168.04
HHF1	mRNA	311	43.28	2127	1150.72
FPR1	mRNA	344	34.63	2125	1149.64
ACB1	mRNA	263	37.29	2121	1147.48
RPL14B	mRNA	417	30.36	2071	1120.43
RPS27A	mRNA	249	36.54	2064	1116.64
RPL33B	mRNA	324	26.43	2057	1112.85
GSP1	mRNA	659	33.49	2002	1083.1
RPL35A	mRNA	363	30.325	1952	1056.05
SUI1	mRNA	326	37.9	1943	1051.18
HXK2	mRNA	1460	42.37	1937	1047.93
VMA3	mRNA	482	42.745	1920	1038.74
RPL31B	mRNA	342	29.23	1889	1021.96
TRX2	mRNA	314	30.555	1888	1021.42
MRH1	mRNA	962	46.265	1816	982.471
HSC82	mRNA	2117	30.195	1790	968.405
PNC1	mRNA	650	35.04	1761	952.716
RPL8A	mRNA	770	31.98	1752	947.847
RPS7B	mRNA	573	33	1741	941.896
TRX1	mRNA	311	34.915	1704	921.878
IPP1	mRNA	863	34.28	1695	917.009
NOP10	mRNA	176	33.73	1675	906.189
POR1	mRNA	851	40.76	1664	900.238
PFY1	mRNA	381	36.42	1642	888.336
BGL2	mRNA	941	44.365	1640	887.254
PMP1	mRNA	122	46.06	1638	886.172
RPL6B	mRNA	531	32.065	1606	868.86
HYP2	mRNA	473	46.095	1598	864.531
RPS24B	mRNA	408	33.86	1581	855.334
RPL11B	mRNA	524	28.825	1576	852.629
ATP2	mRNA	1535	35.36	1573	851.006
SSA2	mRNA	1919	33.32	1554	840.727
LSP1	mRNA	1025	42.42	1520	822.333
HHF2	mRNA	311	40.5	1519	821.792
TIP1	mRNA	632	44.02	1496	809.349
GAS1	mRNA	1679	41.32	1457	788.249
ASP3-4	mRNA	1088	40.315	1450	784.462
VMA10	mRNA	345	34.745	1444	781.216
YRB1	mRNA	605	38.455	1428	772.56
MIC26	mRNA	701	37.6	1416	766.068
TIF11	mRNA	461	30.62	1399	756.871
OLE1	mRNA	1532	45.17	1389	751.461
HSP104	mRNA	2726	41.22	1374	743.346
CIS3	mRNA	683	42.4	1365	738.477
GIS2	mRNA	461	30.09	1361	736.312
PDI1	mRNA	1568	31.635	1346	728.197
SSS1	mRNA	242	33.02	1334	721.705
SAH1	mRNA	1349	35.42	1333	721.164
TMA7	mRNA	194	32.49	1322	715.213
VMA4	mRNA	701	36.71	1314	710.885
SBA1	mRNA	650	33.09	1310	708.721
MPC2	mRNA	389	40.265	1310	708.721
ECM33	mRNA	1290	43.17	1303	704.934
SNU13	mRNA	380	36.85	1302	704.393
PMP2	mRNA	131	51.26	1295	700.606
GLK1	mRNA	1502	42.28	1291	698.442
GCN4	mRNA	845	44.98	1280	692.491
URA1	mRNA	944	38.42	1269	686.54
TIM10	mRNA	281	35.64	1266	684.917
PMP3	mRNA	167	42.44	1249	675.72
YNL208W	mRNA	599	39.675	1240	670.85
PHO5	mRNA	1403	38.65	1220	660.03
EMI2	mRNA	1502	38.42	1217	658.407
ADE13	mRNA	1448	37	1207	652.997
YOP1	mRNA	543	42.2	1201	649.751
ADK1	mRNA	668	34.895	1196	647.046
MBF1	mRNA	455	53.79	1191	644.341
SND3	mRNA	566	37.78	1175	635.685
ILV5	mRNA	1187	53.26	1160	627.57
KTR5	mRNA	1568	44.605	1154	624.324
CYS4	mRNA	1523	37.78	1149	621.619
PMA1	mRNA	2756	42.12	1147	620.537
HOM2	mRNA	1097	32.83	1141	617.291
CDC33	mRNA	641	33.14	1140	616.75
RIB4	mRNA	509	33.89	1136	614.586
NCE102	mRNA	521	46.79	1129	610.799
HSP10	mRNA	320	34.545	1112	601.601
YLR257W	mRNA	965	40.61	1111	601.06
SES1	mRNA	1388	30.83	1107	598.896
DDR48	mRNA	1292	42.995	1096	592.945
UBC4	mRNA	447	38.25	1076	582.125
KRS1	mRNA	1775	29.98	1072	579.961
RPL9B	mRNA	575	35.08	1069	578.338
OLA1	mRNA	1184	32.21	1067	577.256
OYE2	mRNA	1202	35.16	1066	576.715
HTB2	mRNA	395	40.71	1049	567.518
PGM2	mRNA	1709	44.65	1027	555.616
SEC53	mRNA	764	34.91	1026	555.075
YDL124W	mRNA	938	44.31	1024	553.993
PHO12	mRNA	1403	37.71	1023	553.452
SMT3	mRNA	305	32.84	1023	553.452
RNR4	mRNA	1037	34.71	1022	552.911
TPM1	mRNA	599	31.43	1015	549.124
ARO4	mRNA	1112	33.4	1009	545.878
TAL1	mRNA	1007	37.31	1007	544.795
YER010C	mRNA	704	34.39	997	539.385
UGP1	mRNA	1499	41.91	984	532.352
RTN1	mRNA	887	41.89	981	530.729
SBP1	mRNA	884	32.82	975	527.483
SUI3	mRNA	857	32.85	968	523.696
SUB2	mRNA	1340	36.44	961	519.909
SSC1	mRNA	1964	40.98	944	510.712
ASN1	mRNA	1718	32.46	944	510.712
SBH2	mRNA	266	32.08	934	505.302
RHO1	mRNA	629	40.12	920	497.728
PET9	mRNA	956	40.71	919	497.187
VOA1	mRNA	797	34.52	907	490.695
ARF2	mRNA	585	39.9	905	489.613
BMH2	mRNA	905	35.98	896	484.744
GDH1	mRNA	1364	34.08	896	484.744
FCY1	mRNA	476	36.33	895	484.203
SHM2	mRNA	1409	50.14	891	482.039
VMA7	mRNA	356	42.09	884	478.251
EXG1	mRNA	1346	45.28	882	477.169
TRR1	mRNA	959	34	873	472.3
APE3	mRNA	1613	34.3	867	469.054
NHP2	mRNA	470	33.85	866	468.513
ARC1	mRNA	1130	31.905	866	468.513
BAT1	mRNA	1181	34.055	866	468.513
SML1	mRNA	314	55.15	857	463.644
CMD1	mRNA	443	37.69	852	460.939
YNK1	mRNA	461	41	849	459.316
VMA11	mRNA	494	35.92	847	458.234
STE2	mRNA	1295	48.96	839	453.906
SNA3	mRNA	401	36.98	836	452.283
YRA1	mRNA	681	38.59	833	450.66
HIS1	mRNA	893	36.985	832	450.119
SAR1	mRNA	573	35.225	830	449.037
RDL1	mRNA	419	38.985	830	449.037
TKL1	mRNA	2042	33.52	829	448.496
HXT3	mRNA	1703	39.29	827	447.414
ILV3	mRNA	1757	34.32	825	446.332
GUK1	mRNA	563	33.345	824	445.791
ADE12	mRNA	1301	36.52	823	445.25
HOM6	mRNA	1079	32.71	817	442.004
QCR7	mRNA	383	37.58	811	438.758
PEP4	mRNA	1217	36.725	810	438.217
ZUO1	mRNA	1301	31.145	808	437.135
HXT2	mRNA	1625	50.38	808	437.135
THS1	mRNA	2204	33.96	803	434.43
GUS1	mRNA	2126	35.115	800	432.807
SSE1	mRNA	2081	29.035	800	432.807
GND1	mRNA	1469	30.795	798	431.725
YPL225W	mRNA	440	38.08	793	429.02
ATP18	mRNA	179	32.9	792	428.479
ATP17	mRNA	305	37.37	781	422.528
HPT1	mRNA	665	47.25	781	422.528
HNT1	mRNA	477	41.115	774	418.741
DED81	mRNA	1664	32.02	774	418.741
ERG11	mRNA	1592	39.515	772	417.659
YPT1	mRNA	620	34.4	772	417.659
PIL1	mRNA	1019	47.515	772	417.659
SUP45	mRNA	1313	34.94	770	416.576
YET1	mRNA	620	38.305	768	415.494
ATP4	mRNA	734	38.53	768	415.494
PAA1	mRNA	575	38.89	768	415.494
TPS1	mRNA	1487	40.265	766	414.412
ATP19	mRNA	206	34.96	765	413.871
PYP1	mRNA	725	33.03	765	413.871
PDA1	mRNA	1262	32.765	762	412.248
YGP1	mRNA	1064	50.52	762	412.248
QCR8	mRNA	284	37.795	760	411.166
SEM1	mRNA	269	35.24	757	409.543
NSR1	mRNA	1244	32.23	757	409.543
MEO1	mRNA	206	49.63	753	407.379
PRC1	mRNA	1598	43.245	748	404.674
RGI1	mRNA	485	48.655	746	403.592
VMA8	mRNA	770	31.395	746	403.592
ATP16	mRNA	482	32.31	742	401.428
ARC15	mRNA	464	36.58	739	399.805
ADO1	mRNA	1022	28.08	738	399.264
GRX1	mRNA	332	36.365	738	399.264
ADH3	mRNA	1127	38.08	733	396.559
YSA1	mRNA	695	35.315	732	396.018
SGT2	mRNA	1040	35.955	730	394.936
CCW14	mRNA	716	43.73	729	394.395
ADE17	mRNA	1778	41.985	724	391.69
RPO26	mRNA	468	35.155	722	390.608
ERG20	mRNA	1058	34.28	721	390.067
RIM1	mRNA	408	37.7	718	388.444
ERG2	mRNA	668	33.04	717	387.903
CBR1	mRNA	854	31.54	717	387.903
NOP56	mRNA	1514	29.75	715	386.821
ERG6	mRNA	1151	36.59	711	384.657
VMA13	mRNA	1436	35.2	709	383.575
PRE9	mRNA	776	34.98	706	381.952
RFS1	mRNA	632	42.37	705	381.411
ARO2	mRNA	1130	29.525	700	378.706
NTF2	mRNA	377	33.9	699	378.165
SPI1	mRNA	446	45.76	696	376.542
SRL1	mRNA	632	37.08	695	376.001
YHB1	mRNA	1199	41.145	694	375.46
GRS1	mRNA	2003	32.13	694	375.46
SSZ1	mRNA	1616	30.93	693	374.919
ATP15	mRNA	188	42.49	692	374.378
PIC2	mRNA	902	37	692	374.378
EMP24	mRNA	611	34.22	691	373.837
NOP1	mRNA	983	33.645	690	373.296
TOM6	mRNA	185	39.87	689	372.755
CTS1	mRNA	1688	42.33	683	369.509
UTR2	mRNA	1403	42.145	680	367.886
NPL3	mRNA	1244	37.34	680	367.886
SCL1	mRNA	758	36.79	679	367.345
YET3	mRNA	611	41.1	675	365.181
YBR085C-A	mRNA	257	43.775	674	364.64
NHP6A	mRNA	281	38.23	671	363.017
GCV3	mRNA	512	32	666	360.312
ATP7	mRNA	524	40.28	663	358.689
SPL2	mRNA	446	42.36	657	355.443
VTC3	mRNA	2507	35.81	656	354.902
ERG3	mRNA	1097	43.52	655	354.361
PST2	mRNA	596	39.53	654	353.82
VMA6	mRNA	1037	39.745	654	353.82
YSY6	mRNA	197	34.07	653	353.279
PUP2	mRNA	782	32.875	652	352.738
CYS3	mRNA	1184	37.675	650	351.655
CPR5	mRNA	677	35.24	649	351.114
GPH1	mRNA	2708	46.29	648	350.573
ECM15	mRNA	314	35.45	647	350.032
PDB1	mRNA	1100	35.16	645	348.95
TIF34	mRNA	1043	33.64	645	348.95
ATP1	mRNA	1637	35.865	640	346.245
IMD3	mRNA	1571	29.98	640	346.245
DPS1	mRNA	1673	32.88	637	344.622
GPD1	mRNA	1175	33.88	636	344.081
ALD6	mRNA	1502	45.39	635	343.54
TIF35	mRNA	824	32.81	633	342.458
QCR9	mRNA	201	48.4	630	340.835
RET3	mRNA	569	37.18	629	340.294
MDH1	mRNA	1004	32.72	629	340.294
SAM1	mRNA	1148	35.81	627	339.212
SUR2	mRNA	1049	41.24	625	338.13
HMO1	mRNA	740	34.78	624	337.589
RPB10	mRNA	212	41.29	623	337.048
PRE6	mRNA	764	28.92	619	334.884
IMD4	mRNA	1575	33.82	616	333.261
MGE1	mRNA	686	33.31	616	333.261
HEM13	mRNA	986	42.5	615	332.72
CHA1	mRNA	1082	41.64	615	332.72
ERG25	mRNA	929	44.87	613	331.638
PRE10	mRNA	866	36	613	331.638
COX8	mRNA	236	39.92	613	331.638
PIS1	mRNA	662	40.095	608	328.933
ABF2	mRNA	551	44.77	607	328.392
RPL7B	mRNA	736	30.16	607	328.392
GAR1	mRNA	617	29.49	600	324.605
ERG10	mRNA	1196	35.34	596	322.441
YKT6	mRNA	602	35.74	595	321.9
CDC48	mRNA	2507	34.59	594	321.359
SHR3	mRNA	632	33.86	589	318.654
TIF3	mRNA	1310	31.05	588	318.113
GRX2	mRNA	431	38.06	588	318.113
PFK1	mRNA	2963	39.93	586	317.031
CLC1	mRNA	701	33.325	586	317.031
SDH3	mRNA	596	39.5	585	316.49
NHP6B	mRNA	327	40.83	583	315.408
GET3	mRNA	1064	34.72	583	315.408
UTH1	mRNA	1097	46.935	580	313.785
CAF20	mRNA	485	38.7	578	312.703
SBH1	mRNA	248	35.65	575	311.08
TYS1	mRNA	1184	33.54	574	310.539
CIT1	mRNA	1439	43.75	568	307.293
ARO3	mRNA	1112	34.9	567	306.752
FRS1	mRNA	1787	34.92	567	306.752
HMF1	mRNA	389	37.89	566	306.211
ERV25	mRNA	635	32.915	566	306.211
ASN2	mRNA	1718	34.25	565	305.67
KAR2	mRNA	2048	37.86	565	305.67
COX12	mRNA	251	40.23	561	303.506
COX13	mRNA	389	36.245	558	301.883
PRE2	mRNA	863	34.2	558	301.883
ADE5_2C7	mRNA	2408	35.81	557	301.342
RNR2	mRNA	1199	39.865	556	300.801
PUP3	mRNA	617	40.465	556	300.801
VMA16	mRNA	641	37	553	299.178
COX4	mRNA	480	43.48	551	298.096
ERV14	mRNA	416	40.58	550	297.555
FAA4	mRNA	2084	43.545	550	297.555
THR4	mRNA	1544	36.655	548	296.473
PRE1	mRNA	596	37.475	548	296.473
PRE5	mRNA	704	36.26	547	295.932
TMH11	mRNA	317	38.135	544	294.309
ATP3	mRNA	935	34.23	543	293.768
WTM1	mRNA	1313	39.2	541	292.686
YRO2	mRNA	1034	41	538	291.063
YDJ1	mRNA	1229	39.38	537	290.522
RPS4B	mRNA	786	28.815	534	288.899
DBP2	mRNA	1641	30.225	532	287.816
PRE3	mRNA	648	35.12	531	287.275
SCS2	mRNA	734	33.48	531	287.275
CTF8	mRNA	401	35.55	530	286.734
TIM11	mRNA	290	36.96	525	284.029
RPN8	mRNA	1016	33.175	524	283.488
ACP1	mRNA	377	36.37	519	280.783
APA1	mRNA	965	36.35	519	280.783
ATP5	mRNA	638	36.92	518	280.242
MET6	mRNA	2303	54	517	279.701
SPE3	mRNA	881	36.055	516	279.16
SAM4	mRNA	977	31.43	515	278.619
RPS9A	mRNA	594	46.62	510	275.914
PIR1	mRNA	1025	48.59	509	275.373
COX6	mRNA	446	41.77	509	275.373
URA5	mRNA	680	39.825	508	274.832
RPN5	mRNA	1337	38.11	507	274.291
SCW10	mRNA	1169	44.62	507	274.291
CBF5	mRNA	1451	31.91	504	272.668
ILS1	mRNA	3218	36.16	504	272.668
GUA1	mRNA	1577	29.81	502	271.586
GLC7	mRNA	939	37.27	499	269.963
MCR1	mRNA	965	41.08	499	269.963
UBI4	mRNA	1145	54.38	499	269.963
CAM1	mRNA	1247	34.55	498	269.422
PGA2	mRNA	389	30.61	495	267.799
TUF1	mRNA	1313	41.77	495	267.799
VAS1	mRNA	3314	32.42	495	267.799
COX5B	mRNA	456	41.31	495	267.799
SEC28	mRNA	890	34.92	493	266.717
ICY1	mRNA	383	42.235	492	266.176
SKP1	mRNA	584	38.54	489	264.553
ARP2	mRNA	1176	37.67	489	264.553
QCR6	mRNA	443	30.56	489	264.553
ARB1	mRNA	1832	36.925	488	264.012
MUP1	mRNA	1724	49.035	488	264.012
TIF5	mRNA	1217	42.19	487	263.471
SUI2	mRNA	914	36.77	486	262.93
LPD1	mRNA	1499	34.66	485	262.389
GCD11	mRNA	1583	34.64	483	261.307
FCY2	mRNA	1601	44.635	482	260.766
MLC1	mRNA	449	35.48	481	260.225
YLR179C	mRNA	605	42.275	480	259.684
SAM2	mRNA	1154	47.375	480	259.684
SER1	mRNA	1187	35.26	478	258.602
COR1	mRNA	1373	35.29	475	256.979
ARA1	mRNA	1034	39.68	475	256.979
AYR1	mRNA	893	40.805	474	256.438
SCS7	mRNA	1154	41.06	472	255.356
VMA2	mRNA	1553	42.54	472	255.356
SFT1	mRNA	294	39.92	471	254.815
PRE7	mRNA	725	37.745	470	254.274
HSP60	mRNA	1718	39.25	469	253.733
PRE4	mRNA	800	35.5	469	253.733
ARC40	mRNA	1154	40.56	468	253.192
DUG1	mRNA	1445	35.46	467	252.651
MIC10	mRNA	293	33.575	466	252.11
RPN13	mRNA	470	36.4	466	252.11
VTC4	mRNA	2165	39.93	465	251.569
RPT1	mRNA	1403	35.44	465	251.569
CWP1	mRNA	719	55.43	465	251.569
IRC22	mRNA	677	32.5	463	250.487
KRE2	mRNA	1328	44.33	463	250.487
RPB8	mRNA	440	32.23	461	249.405
YPT31	mRNA	671	33.305	460	248.864
LEU1	mRNA	2339	35.96	459	248.323
TOS1	mRNA	1367	34.91	458	247.782
ELO1	mRNA	932	39.965	458	247.782
GVP36	mRNA	980	38.095	458	247.782
ATP14	mRNA	374	43.74	457	247.241
ACO1	mRNA	2336	37.52	457	247.241
YMR295C	mRNA	593	40	457	247.241
INA1	mRNA	2027	52.09	457	247.241
LAT1	mRNA	1448	28.9	457	247.241
VMA1	mRNA	3215	36.5	454	245.618
MRP8	mRNA	659	38.11	453	245.077
ERG28	mRNA	446	41.825	452	244.536
HSP82	mRNA	2129	46.165	452	244.536
HSP42	mRNA	1127	39.23	451	243.995
SNC2	mRNA	347	38.31	451	243.995
LSM6	mRNA	260	35.76	451	243.995
PRS1	mRNA	1283	41.24	451	243.995
YMR226C	mRNA	803	32.225	450	243.454
FPR4	mRNA	1178	29.48	448	242.372
RNA1	mRNA	1223	35.19	447	241.831
YPT7	mRNA	626	32.23	447	241.831
LSM7	mRNA	348	38	447	241.831
RPN6	mRNA	1304	39.51	446	241.29
MXR1	mRNA	554	43.49	446	241.29
ATP20	mRNA	347	35.355	446	241.29
ITR1	mRNA	1754	41.695	444	240.208
EMC4	mRNA	572	36.41	443	239.667
ADH6	mRNA	1082	40.12	443	239.667
RAS2	mRNA	968	36.19	443	239.667
RPL22B	mRNA	369	51.82	442	239.126
IDH2	mRNA	1109	36.765	440	238.044
YDR341C	mRNA	1823	32.6	440	238.044
YMR315W	mRNA	1049	42.97	439	237.503
VMA9	mRNA	223	36.55	439	237.503
RPS14B	mRNA	417	38.92	437	236.421
SOD2	mRNA	701	41.9	436	235.88
ARC19	mRNA	515	38.67	433	234.257
OST1	mRNA	1430	37.085	432	233.716
RPT6	mRNA	1217	37.63	431	233.175
FPR3	mRNA	1235	26.97	431	233.175
GSY1	mRNA	2126	40.61	430	232.634
AHC2	mRNA	386	38.53	428	231.552
SIS1	mRNA	1058	41.45	428	231.552
HIS4	mRNA	2399	36.32	427	231.011
RPT2	mRNA	1313	35.43	425	229.929
ERG4	mRNA	1421	36.155	424	229.388
FOL2	mRNA	731	29.535	422	228.306
ARC18	mRNA	536	39.44	422	228.306
PRO3	mRNA	860	34.6	421	227.765
WBP1	mRNA	1292	38.75	420	227.224
SCW4	mRNA	1160	50.83	420	227.224
TSC3	mRNA	242	37.89	419	226.683
VMA5	mRNA	1178	40.11	419	226.683
KIN3	mRNA	1307	42.56	419	226.683
FAS2	mRNA	5663	42.12	419	226.683
VPH1	mRNA	2522	37.68	418	226.142
SDD2	mRNA	437	34.715	416	225.06
DYS1	mRNA	1163	33.18	415	224.519
RIB3	mRNA	626	35.375	412	222.895
VPS68	mRNA	554	39.71	411	222.354
PGA3	mRNA	938	35.5	410	221.813
MNP1	mRNA	584	38.11	409	221.272
TOM5	mRNA	152	41.24	409	221.272
PHO86	mRNA	935	34.19	407	220.19
GSY2	mRNA	2117	43.915	406	219.649
PUP1	mRNA	785	36.96	406	219.649
PPN2	mRNA	980	36.16	405	219.108
SSA1	mRNA	1928	39.54	404	218.567
TSC13	mRNA	932	37.98	404	218.567
GLO1	mRNA	980	38.5	403	218.026
CRH1	mRNA	1523	42.75	403	218.026
RVS161	mRNA	797	41.28	401	216.944
RPB5	mRNA	647	38.93	400	216.403
MDM35	mRNA	260	41.5	399	215.862
IZH2	mRNA	953	45.58	398	215.321
RPN3	mRNA	1571	38.86	398	215.321
RPL1B	mRNA	653	38.86	397	214.78
CDC42	mRNA	575	35.195	396	214.239
NIP7	mRNA	545	36.265	396	214.239
MIR1	mRNA	935	43.45	396	214.239
RPL18B	mRNA	561	37.895	396	214.239
LHP1	mRNA	827	28.63	396	214.239
CPR6	mRNA	1115	34.355	396	214.239
MDH2	mRNA	1133	54.39	395	213.698
ARP3	mRNA	1349	37.46	395	213.698
SOP4	mRNA	704	34.59	394	213.157
GPP2	mRNA	752	45.215	394	213.157
ELO3	mRNA	1037	35.63	394	213.157
IFA38	mRNA	1043	38.375	394	213.157
NDE1	mRNA	1682	44.06	394	213.157
TMA17	mRNA	452	37.88	393	212.616
PAB1	mRNA	1733	37.26	393	212.616
HYR1	mRNA	491	42.92	393	212.616
SER33	mRNA	1409	45.12	393	212.616
WRS1	mRNA	1298	32.47	392	212.075
SFM1	mRNA	641	33.79	392	212.075
HTS1	mRNA	1640	30.955	392	212.075
SAC6	mRNA	1929	40.6	391	211.534
APT1	mRNA	563	42.53	391	211.534
HRI1	mRNA	734	35.795	390	210.993
PBI2	mRNA	227	44.625	390	210.993
ILV6	mRNA	929	36.81	390	210.993
RPC10	mRNA	212	43.18	390	210.993
YCP4	mRNA	743	38.375	390	210.993
CPR3	mRNA	548	36.35	389	210.452
NOP58	mRNA	1535	39.3	389	210.452
AIM41	mRNA	557	38.79	387	209.37
ADE1	mRNA	920	35.59	387	209.37
DSE2	mRNA	977	51.72	387	209.37
LSC1	mRNA	989	40.22	387	209.37
CCT4	mRNA	1586	30.38	386	208.829
MET14	mRNA	608	46.605	386	208.829
SEC13	mRNA	893	34.715	386	208.829
HCR1	mRNA	797	34.71	385	208.288
LIP1	mRNA	452	39.1	385	208.288
HMRA1	mRNA	382	41.935	384	207.747
STF1	mRNA	260	42.04	383	207.206
LSM2	mRNA	288	44.26	383	207.206
FSH1	mRNA	731	38.32	383	207.206
TOM7	mRNA	182	40.955	382	206.665
PRE8	mRNA	752	38.25	380	205.583
OST5	mRNA	261	40.33	379	205.042
ERP2	mRNA	647	33.885	378	204.501
PUB1	mRNA	1361	41.525	378	204.501
RTC3	mRNA	335	36.96	378	204.501
CCT2	mRNA	1583	35.765	378	204.501
ARC35	mRNA	1028	31.53	377	203.96
CMK2	mRNA	1343	38.29	377	203.96
RIB5	mRNA	716	36.83	377	203.96
QCR2	mRNA	1106	37.835	376	203.419
ADE2	mRNA	1715	44.46	374	202.337
NOP7	mRNA	1817	29.28	374	202.337
PRT1	mRNA	2291	38.2	373	201.796
UMP1	mRNA	446	36.465	372	201.255
RPN11	mRNA	920	37.565	372	201.255
OM14	mRNA	405	44.2	372	201.255
HTZ1	mRNA	404	39.87	371	200.714
PFK2	mRNA	2879	43.03	370	200.173
ERP1	mRNA	659	35.445	370	200.173
GSF2	mRNA	1211	42.96	369	199.632
SND2	mRNA	545	39.67	369	199.632
CCT7	mRNA	1652	41.1	366	198.009
RPN12	mRNA	824	38.43	365	197.468
CCT8	mRNA	1706	37.73	365	197.468
MSC1	mRNA	1541	39.82	363	196.386
RPT3	mRNA	1286	39.93	363	196.386
COX9	mRNA	179	39.74	363	196.386
HAC1	mRNA	717	50.15	362	195.845
TMA22	mRNA	596	34.725	362	195.845
TPS2	mRNA	2690	47.17	361	195.304
MIX17	mRNA	470	38.25	361	195.304
NPC2	mRNA	521	46.735	360	194.763
RVS167	mRNA	1448	38.08	359	194.222
VTC2	mRNA	2486	39.63	358	193.681
RPN2	mRNA	2837	34.68	357	193.14
LSM5	mRNA	281	29.35	357	193.14
RPC40	mRNA	1007	36.4	356	192.599
ARO8	mRNA	1502	37.355	356	192.599
MDH3	mRNA	1031	36.55	356	192.599
BFR1	mRNA	1412	37.245	354	191.517
LIA1	mRNA	977	31.725	354	191.517
ALD4	mRNA	1559	43.115	354	191.517
RPG1	mRNA	2894	36.52	353	190.976
YOS1	mRNA	259	35.63	353	190.976
PRY2	mRNA	989	44.98	352	190.435
PDX3	mRNA	686	36.15	351	189.894
PDR5	mRNA	4535	44.71	350	189.353
YMR099C	mRNA	893	34.415	350	189.353
IDI1	mRNA	866	36.42	349	188.812
TOM22	mRNA	458	40.44	349	188.812
ELF1	mRNA	437	34.05	349	188.812
RPT4	mRNA	1313	41.325	348	188.271
DLD3	mRNA	1490	41.45	347	187.73
TIM17	mRNA	476	39.54	347	187.73
TVP18	mRNA	503	37.95	347	187.73
GLR1	mRNA	1451	36.75	347	187.73
MRT4	mRNA	710	36.02	346	187.189
AMN1	mRNA	1649	48.135	346	187.189
SVF1	mRNA	1445	40.46	345	186.648
CCT3	mRNA	1604	36	345	186.648
MAP1	mRNA	1163	36.84	345	186.648
SPO24	mRNA	203	46.26	344	186.107
CDC60	mRNA	3272	31.655	344	186.107
RPN7	mRNA	1289	40.005	344	186.107
KGD2	mRNA	1391	39.865	344	186.107
NAP1	mRNA	1253	36.58	343	185.566
SHB17	mRNA	815	36.78	343	185.566
GAS5	mRNA	1454	43.62	343	185.566
GDI1	mRNA	1355	50.29	343	185.566
FRS2	mRNA	1511	35.8	343	185.566
URA4	mRNA	1094	34.44	342	185.025
AAT2	mRNA	1256	37.31	342	185.025
PRY1	mRNA	899	49.95	341	184.484
NPT1	mRNA	1289	37.64	341	184.484
PST1	mRNA	1334	47.405	340	183.943
RPS8A	mRNA	610	32.11	340	183.943
SRV2	mRNA	1580	36.155	340	183.943
GLY1	mRNA	1163	52.18	339	183.402
COQ5	mRNA	923	37.24	339	183.402
AGP1	mRNA	1901	54.24	339	183.402
RPB11	mRNA	362	32.83	339	183.402
THO1	mRNA	656	36.815	338	182.861
VPS74	mRNA	1037	37.25	338	182.861
CCT6	mRNA	1640	37.81	336	181.779
PHO8	mRNA	1700	44.21	335	181.238
PTH2	mRNA	626	37.475	334	180.697
GLC3	mRNA	2114	44.93	333	180.156
TPM2	mRNA	485	38.295	332	179.615
MTD1	mRNA	962	53.305	332	179.615
OST2	mRNA	392	40.035	332	179.615
FAS1	mRNA	6155	43.285	332	179.615
ERV46	mRNA	1247	34.725	330	178.533
THR1	mRNA	1073	36	329	177.992
BAT2	mRNA	1130	35.08	329	177.992
END3	mRNA	1049	40.375	328	177.451
ADE3	mRNA	2840	41.005	328	177.451
STI1	mRNA	1769	39.645	328	177.451
YHR020W	mRNA	2066	31.29	328	177.451
DAP1	mRNA	458	40.75	328	177.451
RUB1	mRNA	234	35.5	327	176.91
TMA20	mRNA	546	32.95	326	176.369
RPN10	mRNA	806	32.57	326	176.369
NIT3	mRNA	875	37.18	325	175.828
ALD5	mRNA	1562	48.04	325	175.828
TMA10	mRNA	260	45.43	325	175.828
KTR4	mRNA	1394	41.7	324	175.287
SUP35	mRNA	2057	40.74	323	174.746
ILV1	mRNA	1730	32.995	322	174.205
SRP14	mRNA	440	34.47	321	173.664
LOG1	mRNA	737	37.68	321	173.664
INH1	mRNA	257	49.9	319	172.582
CAP2	mRNA	863	41.25	319	172.582
BAP3	mRNA	1814	43.92	319	172.582
SEC62	mRNA	824	38.9	319	172.582
URA6	mRNA	614	36.56	319	172.582
CBC2	mRNA	626	38.87	318	172.041
GDT1	mRNA	842	42.045	318	172.041
DPM1	mRNA	803	39.825	318	172.041
ADE8	mRNA	644	37.93	317	171.5
BRX1	mRNA	875	34.33	316	170.959
AIM29	mRNA	467	39.6	315	170.418
MRPS12	mRNA	461	46.29	315	170.418
MES1	mRNA	2255	35.11	315	170.418
ERG24	mRNA	1316	39.025	314	169.877
RIP1	mRNA	647	39.895	314	169.877
FKS1	mRNA	5630	44.655	314	169.877
YIP3	mRNA	531	47.385	312	168.795
LEU4	mRNA	1859	39.15	312	168.795
NCW2	mRNA	764	44.08	311	168.254
FUR1	mRNA	650	34.29	311	168.254
COX5A	mRNA	461	40.935	310	167.713
SVS1	mRNA	782	44.06	310	167.713
PHB2	mRNA	932	36.69	309	167.172
TFS1	mRNA	659	40.69	309	167.172
TUB1	mRNA	1344	30.63	309	167.172
TMC1	mRNA	452	54.665	308	166.631
PTC3	mRNA	1406	36.345	308	166.631
COX17	mRNA	209	43.36	307	166.09
LCB2	mRNA	1685	31.105	306	165.549
GGC1	mRNA	902	38.625	306	165.549
VTA1	mRNA	992	35.905	306	165.549
HIS3	mRNA	662	38.125	306	165.549
UBC7	mRNA	497	37.61	303	163.926
ACS2	mRNA	2051	36.76	303	163.926
PEX34	mRNA	434	41.92	301	162.844
NOP15	mRNA	662	33.93	301	162.844
SEC11	mRNA	503	41	301	162.844
KTR1	mRNA	1181	40.62	301	162.844
SEC17	mRNA	879	38.56	300	162.303
ZRC1	mRNA	1328	34.91	300	162.303
SRP21	mRNA	503	40.65	300	162.303
MRPL50	mRNA	419	40.52	299	161.762
RLP24	mRNA	599	41.3	299	161.762
ZRT2	mRNA	1268	45.72	299	161.762
PHO13	mRNA	938	41.41	299	161.762
HSP30	mRNA	998	40.26	299	161.762
ARL1	mRNA	551	36.84	299	161.762
RPE1	mRNA	716	37.54	299	161.762
TOM70	mRNA	1853	37.15	298	161.221
LYS12	mRNA	1115	33.46	297	160.68
HOG1	mRNA	1307	39.36	297	160.68
HRP1	mRNA	1604	42.81	297	160.68
KES1	mRNA	1304	42.63	297	160.68
RPT5	mRNA	1304	37.805	296	160.138
MAP2	mRNA	1265	36.1	296	160.138
TIM8	mRNA	263	40.33	295	159.597
CAJ1	mRNA	1175	35.08	295	159.597
ZWF1	mRNA	1517	42.57	295	159.597
MIA40	mRNA	1211	41.885	294	159.056
SSH1	mRNA	1472	37.58	294	159.056
MRP2	mRNA	347	42.15	294	159.056
RDI1	mRNA	608	38.76	293	158.515
RCF2	mRNA	674	39.54	293	158.515
LSC2	mRNA	1283	41.42	293	158.515
PHB1	mRNA	863	44.415	292	157.974
SDT1	mRNA	842	48.665	292	157.974
MCA1	mRNA	1298	41.14	291	157.433
APD1	mRNA	950	36.885	290	156.892
SDH4	mRNA	545	46.32	289	156.351
RPN1	mRNA	2981	37.12	289	156.351
TRP5	mRNA	2123	38.3	289	156.351
CCT5	mRNA	1688	32.12	289	156.351
SRP54	mRNA	1625	38.25	289	156.351
LSM1	mRNA	518	38.57	288	155.81
RVB1	mRNA	1391	38.49	288	155.81
ARG4	mRNA	1391	40.025	288	155.81
COS1	mRNA	1145	39.39	287	155.269
DOG2	mRNA	740	45.01	286	154.728
PYC2	mRNA	3542	38.27	285	154.187
RFA3	mRNA	368	39.88	285	154.187
GIM3	mRNA	389	45.17	285	154.187
FPR2	mRNA	407	38.515	284	153.646
HSP12	mRNA	329	37.95	284	153.646
CRN1	mRNA	1955	39.48	283	153.105
MDM34	mRNA	1379	38.88	282	152.564
ERG13	mRNA	1475	37.6	282	152.564
CHO1	mRNA	830	51.98	282	152.564
CYC7	mRNA	341	36.325	282	152.564
SDH2	mRNA	800	46.5	281	152.023
CHO2	mRNA	2609	48.3	280	151.482
PRX1	mRNA	785	37.675	280	151.482
LTP1	mRNA	485	34.12	279	150.941
RCK2	mRNA	1832	41.425	278	150.4
TPD3	mRNA	1907	39.595	278	150.4
ATG27	mRNA	815	35.59	277	149.859
ZRT1	mRNA	1130	50.55	276	149.318
PTM1	mRNA	1571	37.68	275	148.777
RRB1	mRNA	1535	33.92	275	148.777
IMP1	mRNA	572	38.67	275	148.777
PMI40	mRNA	1290	36.15	275	148.777
GFA1	mRNA	2153	38.68	273	147.695
GBP2	mRNA	1283	35.15	273	147.695
SEC63	mRNA	1991	37.77	272	147.154
YPR1	mRNA	938	40.85	272	147.154
CYT1	mRNA	929	40.46	272	147.154
PRO2	mRNA	1370	32.92	271	146.613
ISD11	mRNA	284	45.25	271	146.613
SSO1	mRNA	872	40.71	271	146.613
IMD2	mRNA	1571	38.33	271	146.613
TEF4	mRNA	1239	35.49	270	146.072
BDH1	mRNA	1148	40.08	270	146.072
RPF2	mRNA	1034	37.125	270	146.072
ECT1	mRNA	971	39.67	270	146.072
HRR25	mRNA	1484	40.49	270	146.072
RBD2	mRNA	788	40.19	269	145.531
MNN9	mRNA	1187	36.79	269	145.531
ELO2	mRNA	1043	37.48	269	145.531
GET4	mRNA	938	35.9	269	145.531
VPS1	mRNA	2114	35.37	269	145.531
DSE1	mRNA	1721	55.84	268	144.99
MFA2	mRNA	116	47.37	268	144.99
WWM1	mRNA	635	32.405	268	144.99
ARD1	mRNA	716	39.41	267	144.449
CHS5	mRNA	2015	40.29	267	144.449
ADE16	mRNA	1775	35.8	265	143.367
ADE6	mRNA	4076	40.39	265	143.367
KRE29	mRNA	1394	41.435	264	142.826
SRP1	mRNA	1628	39.485	264	142.826
DUT1	mRNA	443	38.515	264	142.826
NTH1	mRNA	2255	43.11	264	142.826
EMC5	mRNA	425	39.675	264	142.826
ALA1	mRNA	2876	34.5	264	142.826
EFB1	mRNA	621	36.755	264	142.826
YPT52	mRNA	704	34.75	263	142.285
GET1	mRNA	707	34.11	263	142.285
BUR6	mRNA	428	40.87	263	142.285
PET309	mRNA	2897	40.85	263	142.285
SPT4	mRNA	308	50.8	263	142.285
ERG27	mRNA	1043	36.945	262	141.744
BNA7	mRNA	785	39.065	262	141.744
KTR3	mRNA	1214	38.245	262	141.744
PCL5	mRNA	689	46.52	261	141.203
LSB1	mRNA	725	43.52	261	141.203
SWP1	mRNA	860	38.12	261	141.203
YDC1	mRNA	953	36.71	261	141.203
VPS55	mRNA	422	41.92	260	140.662
TIF6	mRNA	737	55.94	260	140.662
IGO1	mRNA	506	45.505	260	140.662
SSB1	mRNA	1841	31.21	260	140.662
SEC66	mRNA	620	38.96	259	140.121
PRS3	mRNA	962	40.85	259	140.121
LSM12	mRNA	563	36.7	259	140.121
LSM4	mRNA	563	38.64	259	140.121
TAF14	mRNA	735	37.885	258	139.58
TED1	mRNA	1421	33.53	258	139.58
DPH5	mRNA	902	39.96	257	139.039
VPS24	mRNA	674	44.17	257	139.039
OPI3	mRNA	620	44.51	256	138.498
SEC72	mRNA	581	40.585	256	138.498
NCB2	mRNA	441	37.73	255	137.957
ADD66	mRNA	803	35.65	255	137.957
CHZ1	mRNA	461	33.18	255	137.957
QDR2	mRNA	1628	50.94	255	137.957
TMH18	mRNA	486	40.09	255	137.957
SSP120	mRNA	704	36.925	254	137.416
ADE4	mRNA	1532	45.395	254	137.416
SLT2	mRNA	1454	50.4	253	136.875
HEM2	mRNA	1028	41.82	253	136.875
ESF1	mRNA	1886	40.42	253	136.875
CKB1	mRNA	836	37.06	253	136.875
ASP1	mRNA	1145	37.27	253	136.875
LSO2	mRNA	278	45.965	252	136.334
FAA1	mRNA	2102	40.5	252	136.334
SEC21	mRNA	2807	41.725	252	136.334
ERG5	mRNA	1616	52.42	251	135.793
GPD2	mRNA	1322	42.96	251	135.793
RPB7	mRNA	515	42.25	250	135.252
RRP7	mRNA	893	43.35	250	135.252
TUB3	mRNA	1338	35.475	250	135.252
THG1	mRNA	713	39.52	249	134.711
ACC1	mRNA	6701	35.82	248	134.17
COX7	mRNA	182	45.64	248	134.17
COA3	mRNA	257	42.15	247	133.629
DBP5	mRNA	1448	35.72	247	133.629
CCS1	mRNA	749	32.74	247	133.629
CIC1	mRNA	1130	45.285	246	133.088
BCY1	mRNA	1250	41.865	246	133.088
LAP2	mRNA	2015	42.49	246	133.088
HMT1	mRNA	1046	45.5	246	133.088
ECM14	mRNA	1292	38.195	246	133.088
FUN12	mRNA	3008	37.2	246	133.088
MNN10	mRNA	1181	38.175	246	133.088
TOM40	mRNA	1163	46.07	246	133.088
PPH21	mRNA	1109	40.96	246	133.088
APS2	mRNA	443	40.08	245	132.547
BAP2	mRNA	1829	54.68	244	132.006
RLP7	mRNA	968	41.52	244	132.006
DAD1	mRNA	284	48.04	243	131.465
HEK2	mRNA	1145	32.23	243	131.465
TYE7	mRNA	875	49.56	242	130.924
TIF4631	mRNA	2858	39.34	242	130.924
GCN20	mRNA	2258	41.075	242	130.924
SUS1	mRNA	292	40.96	241	130.383
PMT2	mRNA	2279	34.405	240	129.842
KRE9	mRNA	830	42.37	240	129.842
ARO9	mRNA	1541	47.76	240	129.842
CKB2	mRNA	776	39.76	240	129.842
RER1	mRNA	566	39.48	239	129.301
REE1	mRNA	596	37.67	239	129.301
ODC2	mRNA	923	35.74	239	129.301
VPS21	mRNA	632	40.225	238	128.76
CDC10	mRNA	968	40.04	238	128.76
TPO3	mRNA	1868	47.2	237	128.219
RAM2	mRNA	950	37.42	237	128.219
QCR10	mRNA	234	47.7	237	128.219
TIM13	mRNA	317	37	237	128.219
PHS1	mRNA	653	44.41	236	127.678
GLN4	mRNA	2429	40.625	236	127.678
FET4	mRNA	1658	51.11	236	127.678
MTC1	mRNA	1436	38.61	235	127.137
FUM1	mRNA	1466	35.97	235	127.137
STE4	mRNA	1271	45.08	235	127.137
YRB2	mRNA	983	32.29	235	127.137
URM1	mRNA	299	33.76	235	127.137
DID2	mRNA	614	37.34	234	126.596
YBR056W	mRNA	1505	37.49	234	126.596
KRR1	mRNA	950	34.85	234	126.596
TIF2	mRNA	1187	35.015	234	126.596
UBC1	mRNA	647	35.59	234	126.596
CKA2	mRNA	1019	43.77	234	126.596
SHM1	mRNA	1472	39.21	233	126.055
IDH1	mRNA	1082	39.92	233	126.055
MRPL51	mRNA	422	41.58	233	126.055
UIP3	mRNA	707	48.02	232	125.514
DYN2	mRNA	280	32.52	232	125.514
PEA2	mRNA	1262	40.935	232	125.514
STT3	mRNA	2156	37.22	232	125.514
AIM7	mRNA	449	42.14	231	124.973
PHO3	mRNA	1403	35.625	230	124.432
GCV1	mRNA	1202	46.3	230	124.432
SIM1	mRNA	1433	45.02	230	124.432
IZH1	mRNA	950	43.965	230	124.432
YPR204W	mRNA	3098	51.81	230	124.432
CCP1	mRNA	1085	43.2	229	123.891
RPB4	mRNA	665	41.87	229	123.891
SCP160	mRNA	3668	36.13	229	123.891
TRP2	mRNA	1523	35.54	229	123.891
UBC13	mRNA	462	30.41	229	123.891
NOP16	mRNA	695	37	229	123.891
YGR130C	mRNA	2450	47.67	229	123.891
EXP1	mRNA	449	34.93	228	123.35
RRT8	mRNA	1029	38.83	228	123.35
TSL1	mRNA	3296	47.19	228	123.35
FIS1	mRNA	467	36.85	227	122.809
YIP4	mRNA	707	40.18	227	122.809
SPN1	mRNA	1232	36.65	227	122.809
MPC1	mRNA	392	39.57	227	122.809
BTN2	mRNA	1232	43.89	227	122.809
YPK1	mRNA	2042	37.13	226	122.268
SSO2	mRNA	887	38.61	226	122.268
TNA1	mRNA	1604	46.93	226	122.268
DIP5	mRNA	1826	44.415	226	122.268
SEC65	mRNA	821	37.155	226	122.268
GRX5	mRNA	452	38.1	226	122.268
CUE1	mRNA	611	33.32	226	122.268
RPC19	mRNA	428	39.255	226	122.268
MGM101	mRNA	809	37.11	225	121.727
EBP2	mRNA	1283	35.5	225	121.727
SMI1	mRNA	1517	37.17	225	121.727
DDP1	mRNA	566	32.98	224	121.186
ATX1	mRNA	221	39.79	224	121.186
FPY1	mRNA	824	44.075	224	121.186
AVT7	mRNA	1472	41.345	224	121.186
YIP5	mRNA	932	43.075	224	121.186
YPR148C	mRNA	1307	35.565	224	121.186
MRPL39	mRNA	212	49.96	223	120.645
ETR1	mRNA	1142	39.56	223	120.645
TIM50	mRNA	1430	39.92	223	120.645
KSH1	mRNA	218	46.76	223	120.645
NYV1	mRNA	762	47.93	221	119.563
MXR2	mRNA	506	39	221	119.563
YJU3	mRNA	941	39	221	119.563
SUR7	mRNA	908	42.76	221	119.563
ESS1	mRNA	512	40.43	221	119.563
ILM1	mRNA	611	34.62	221	119.563
MLC2	mRNA	491	38.525	220	119.022
ETT1	mRNA	1238	33.775	220	119.022
CPR2	mRNA	617	38.9	219	118.481
POL30	mRNA	776	39.76	219	118.481
UBP6	mRNA	1499	40.15	219	118.481
AIM6	mRNA	1172	38.93	219	118.481
YRF1-7	mRNA	5580	54.81	219	118.481
DID4	mRNA	699	39.395	218	117.94
SCD6	mRNA	1049	35.36	218	117.94
EMC1	mRNA	2282	40.925	218	117.94
IGO2	mRNA	395	41.535	218	117.94
TCP1	mRNA	1679	40.12	217	117.399
MRX14	mRNA	317	40.26	217	117.399
HIS5	mRNA	1157	39	217	117.399
EMG1	mRNA	758	41.315	216	116.858
SRP68	mRNA	1799	47.56	216	116.858
TIM23	mRNA	668	40.84	216	116.858
DCW1	mRNA	1349	34.52	216	116.858
ERG1	mRNA	1490	39.97	215	116.317
SEC23	mRNA	2306	46.48	215	116.317
IMG2	mRNA	440	43.12	215	116.317
FCF1	mRNA	569	44.68	214	115.776
TOM20	mRNA	551	44.72	214	115.776
TCB3	mRNA	4637	36.55	214	115.776
SNL1	mRNA	479	36.32	214	115.776
CYC1	mRNA	329	37.695	214	115.776
PAM17	mRNA	593	43.92	213	115.235
MRPL37	mRNA	317	39.58	213	115.235
RSM18	mRNA	416	39.63	213	115.235
SAC1	mRNA	1871	32.1	213	115.235
UBA1	mRNA	3074	39.37	213	115.235
PNO1	mRNA	824	41.48	213	115.235
TAF9	mRNA	473	42.04	213	115.235
DOT6	mRNA	2012	38.16	213	115.235
COX14	mRNA	212	39.895	212	114.694
NOP2	mRNA	1856	35.39	212	114.694
GLC8	mRNA	689	38.915	212	114.694
UBC6	mRNA	752	39.23	212	114.694
GNA1	mRNA	479	39.675	212	114.694
GRX3	mRNA	752	36.745	212	114.694
TOA2	mRNA	368	44.86	212	114.694
RTS1	mRNA	2273	40.155	212	114.694
CIR1	mRNA	785	45.3	211	114.153
CUZ1	mRNA	824	30.11	211	114.153
RAD14	mRNA	1116	44.68	211	114.153
PAN5	mRNA	1139	38.82	211	114.153
ERO1	mRNA	1691	41.5	211	114.153
LYS21	mRNA	1322	35.27	210	113.612
SOL3	mRNA	749	35.49	210	113.612
AIM45	mRNA	1034	41.87	210	113.612
RDL2	mRNA	449	40.265	210	113.612
MET22	mRNA	1073	43.53	210	113.612
ILV2	mRNA	2063	45.215	210	113.612
CDC3	mRNA	1562	36.885	210	113.612
DPL1	mRNA	1769	43.775	210	113.612
OM45	mRNA	1181	38.77	210	113.612
STE18	mRNA	332	43	209	113.071
HHO1	mRNA	776	40.39	209	113.071
CRS1	mRNA	2303	32.31	209	113.071
KRE1	mRNA	941	40.66	209	113.071
RSM7	mRNA	743	42.29	209	113.071
YRF1-5	mRNA	5390	53.54	209	113.071
SEC26	mRNA	2921	37.58	209	113.071
SNF4	mRNA	968	40	209	113.071
MKT1	mRNA	2492	34.165	208	112.53
CNB1	mRNA	528	39.645	208	112.53
LSM3	mRNA	269	31.3	207	111.989
AIP1	mRNA	1847	35.52	207	111.989
YBL028C	mRNA	320	42.04	207	111.989
YPT6	mRNA	647	37.82	207	111.989
CSG2	mRNA	1232	48.04	207	111.989
CDC37	mRNA	1520	34.12	206	111.448
IST2	mRNA	2840	41	206	111.448
YNL134C	mRNA	1130	42.62	206	111.448
EMC3	mRNA	761	40.6	205	110.907
YJR096W	mRNA	848	37.84	205	110.907
ALE1	mRNA	1859	42.76	205	110.907
SEC22	mRNA	644	41.14	204	110.366
CDC11	mRNA	1247	39.635	204	110.366
VTI1	mRNA	653	41.7	204	110.366
GRH1	mRNA	1118	38.795	204	110.366
GPI16	mRNA	1832	39.53	204	110.366
SUB1	mRNA	878	33.34	203	109.825
MRP10	mRNA	287	42.85	203	109.825
PMT1	mRNA	2453	33.18	203	109.825
RAD33	mRNA	533	41.65	203	109.825
DFG5	mRNA	1376	40.56	203	109.825
CUP9	mRNA	920	51.48	203	109.825
YPF1	mRNA	1763	49.12	203	109.825
LAP3	mRNA	1364	40.125	202	109.284
TVP15	mRNA	431	44.225	202	109.284
MIM1	mRNA	341	37.31	202	109.284
MRP7	mRNA	1115	42.39	202	109.284
FET3	mRNA	1910	49.335	202	109.284
ENT3	mRNA	1226	42.36	202	109.284
DBP3	mRNA	1571	33.745	202	109.284
NEW1	mRNA	3590	41.43	202	109.284
STE24	mRNA	1361	37.3	201	108.743
GGA2	mRNA	1757	36.29	201	108.743
FES1	mRNA	872	42.2	201	108.743
ORM2	mRNA	650	42.96	200	108.202
ZPR1	mRNA	1460	44.26	200	108.202
GDA1	mRNA	1556	37.82	200	108.202
MSN4	mRNA	1892	52.8	200	108.202
MNN2	mRNA	1793	37.44	200	108.202
NIF3	mRNA	866	34.89	200	108.202
RPA34	mRNA	701	38.085	200	108.202
NUG1	mRNA	1562	33.455	200	108.202
CGR1	mRNA	362	30.75	200	108.202
LYP1	mRNA	1835	38.52	199	107.661
MET3	mRNA	1535	43	199	107.661
MDY2	mRNA	638	39.84	199	107.661
DPP1	mRNA	869	38.085	198	107.12
PUS7	mRNA	2030	33.575	198	107.12
SDO1	mRNA	752	40.925	198	107.12
UGA1	mRNA	1415	46.71	198	107.12
RNH70	mRNA	1661	34.86	198	107.12
DBP9	mRNA	1784	40.28	197	106.579
PAM16	mRNA	449	40.175	196	106.038
ADH5	mRNA	1055	42.38	196	106.038
LCB1	mRNA	1676	38.835	196	106.038
MIC19	mRNA	512	37.7	195	105.497
PPX1	mRNA	1193	39.08	195	105.497
DAP2	mRNA	2456	42.32	195	105.497
SLC1	mRNA	911	41.345	194	104.956
GLO2	mRNA	824	36.905	194	104.956
BOS1	mRNA	735	46.25	194	104.956
PLN1	mRNA	851	40.575	194	104.956
NSG1	mRNA	875	44.025	194	104.956
EMC6	mRNA	326	46.25	194	104.956
MET16	mRNA	785	41.485	194	104.956
ISU1	mRNA	497	47.8	194	104.956
YHM2	mRNA	944	40.21	193	104.415
NCP1	mRNA	2075	34.46	193	104.415
AIM9	mRNA	1883	36.5	193	104.415
FLC1	mRNA	2381	46	193	104.415
LRP1	mRNA	554	35.87	193	104.415
PDR16	mRNA	1055	44.21	192	103.874
APQ12	mRNA	416	45.61	192	103.874
PCL1	mRNA	839	48.275	192	103.874
YER134C	mRNA	536	41.125	192	103.874
BNA3	mRNA	1334	44.88	192	103.874
NSA2	mRNA	785	46.75	191	103.333
ERV41	mRNA	1059	41.52	191	103.333
MRI1	mRNA	1235	33.66	191	103.333
NMD3	mRNA	1556	39.04	191	103.333
RBL2	mRNA	320	35.72	191	103.333
YMR027W	mRNA	1412	35.92	191	103.333
EFM5	mRNA	748	31.04	191	103.333
ERV29	mRNA	932	42.09	191	103.333
YKE2	mRNA	344	33.5	190	102.792
ERG26	mRNA	1049	36.75	190	102.792
SEC14	mRNA	915	50.825	190	102.792
CLU1	mRNA	3833	34.98	189	102.251
BUD20	mRNA	500	35.78	189	102.251
MRPL31	mRNA	395	41.87	189	102.251
GLO3	mRNA	1481	44.46	189	102.251
ALT1	mRNA	1778	40.11	189	102.251
COA2	mRNA	206	39.795	188	101.71
MRPS9	mRNA	836	41.09	188	101.71
CUB1	mRNA	1655	42.845	188	101.71
CST26	mRNA	1193	37.68	188	101.71
HOM3	mRNA	1583	43.03	188	101.71
SSU1	mRNA	1376	45.185	188	101.71
SDH8	mRNA	416	42.76	187	101.169
SLG1	mRNA	1136	43.5	187	101.169
ERP6	mRNA	650	40.44	187	101.169
GPG1	mRNA	380	42.21	187	101.169
UPS2	mRNA	692	34.9	187	101.169
EAF3	mRNA	1205	38.31	187	101.169
LAC1	mRNA	1256	47.74	187	101.169
SDS24	mRNA	1583	43.685	186	100.628
INP51	mRNA	2840	37.645	186	100.628
COX26	mRNA	200	43.385	186	100.628
HAS1	mRNA	1517	34.665	186	100.628
TRM112	mRNA	407	38.16	186	100.628
HAP4	mRNA	1664	48.33	186	100.628
SEC61	mRNA	1442	39.705	186	100.628
MDG1	mRNA	1100	38.71	186	100.628
RCF1	mRNA	479	39.055	186	100.628
TSC11	mRNA	4292	46.52	185	100.087
NNR2	mRNA	1013	38.16	185	100.087
SCW11	mRNA	1628	59.65	185	100.087
YPI1	mRNA	467	38.73	185	100.087
BNA6	mRNA	887	38.45	185	100.087
LOC1	mRNA	614	36.2	185	100.087
RAD6	mRNA	518	40.73	185	100.087
LSB3	mRNA	1380	35.3	185	100.087
SHE10	mRNA	1733	36.11	184	99.5456
EGT2	mRNA	3125	49.18	184	99.5456
LDB7	mRNA	542	48.875	184	99.5456
MRPL20	mRNA	587	42.8	184	99.5456
SRP72	mRNA	1922	43.34	184	99.5456
SEC24	mRNA	2780	38.815	184	99.5456
RVB2	mRNA	1415	44.46	184	99.5456
SNF7	mRNA	722	40.38	184	99.5456
MRP51	mRNA	1034	43.94	184	99.5456
MRPL38	mRNA	416	47.3	183	99.0045
ASC1	mRNA	960	30.77	183	99.0045
COP1	mRNA	3605	38.03	183	99.0045
HMRA2	mRNA	359	48.3	183	99.0045
SVP26	mRNA	686	49.5	183	99.0045
NAT5	mRNA	530	48.3	183	99.0045
DSK2	mRNA	1121	35.69	183	99.0045
GCS1	mRNA	1058	37.45	183	99.0045
YBT1	mRNA	4985	40.69	182	98.4635
CDC12	mRNA	1223	33.145	182	98.4635
ALO1	mRNA	1580	41.635	182	98.4635
PLB1	mRNA	1994	43.46	182	98.4635
CBS1	mRNA	689	41.3	182	98.4635
TCB1	mRNA	3560	40.95	182	98.4635
FRQ1	mRNA	572	39.365	182	98.4635
POM33	mRNA	839	45.445	182	98.4635
CNL1	mRNA	368	43.275	182	98.4635
RPB9	mRNA	368	46.355	182	98.4635
AIM17	mRNA	1397	48.42	182	98.4635
SPC2	mRNA	536	37.015	182	98.4635
EIS1	mRNA	2531	42.23	181	97.9225
RPB3	mRNA	956	39.17	181	97.9225
ABP1	mRNA	1778	34.85	181	97.9225
MAG1	mRNA	890	52.83	181	97.9225
YAR1	mRNA	602	34.56	181	97.9225
LAG1	mRNA	1235	40.71	181	97.9225
TVP23	mRNA	599	39.245	180	97.3815
NSG2	mRNA	899	44.795	180	97.3815
MRPS18	mRNA	653	40.995	180	97.3815
HEM15	mRNA	1181	44.675	180	97.3815
RAD23	mRNA	1196	35.71	180	97.3815
MVD1	mRNA	1190	43.135	180	97.3815
NNR1	mRNA	740	38.86	179	96.8405
PCM1	mRNA	1673	35.79	179	96.8405
YPQ1	mRNA	926	42.88	179	96.8405
TVP38	mRNA	1013	42.37	178	96.2995
YNL190W	mRNA	614	48.39	178	96.2995
LYS9	mRNA	1340	34.42	178	96.2995
MRPL36	mRNA	533	47.76	177	95.7585
GID8	mRNA	1367	52.8	177	95.7585
BCH1	mRNA	2174	36.5	177	95.7585
MNN1	mRNA	2288	44.12	177	95.7585
RRS1	mRNA	611	33	177	95.7585
MRPL33	mRNA	260	42.72	176	95.2175
PRP38	mRNA	728	44.7	176	95.2175
RHO3	mRNA	695	37.82	176	95.2175
TFG1	mRNA	2207	39.675	176	95.2175
DAK1	mRNA	1754	41.185	176	95.2175
DRE2	mRNA	1046	39.84	176	95.2175
FAU1	mRNA	635	40.15	175	94.6765
COS6	mRNA	1145	37.48	175	94.6765
NPL6	mRNA	1307	33.44	175	94.6765
HAP1	mRNA	4508	44.67	175	94.6765
NPA3	mRNA	1157	35.87	175	94.6765
HRT1	mRNA	365	45.81	175	94.6765
TIR1	mRNA	764	52	175	94.6765
PHO81	mRNA	3536	47.14	175	94.6765
MRPL44	mRNA	297	42.09	175	94.6765
DTD1	mRNA	453	38.36	174	94.1355
ERD2	mRNA	660	39.98	174	94.1355
RHO5	mRNA	995	36.585	174	94.1355
AGE1	mRNA	1448	42.985	174	94.1355
CUE5	mRNA	1235	37.485	174	94.1355
EMP47	mRNA	1337	36.66	174	94.1355
RPL15B	mRNA	614	41.52	173	93.5945
FMP52	mRNA	695	42.18	173	93.5945
GNP1	mRNA	1991	44.62	173	93.5945
GFD1	mRNA	566	38.71	173	93.5945
BIO2	mRNA	1127	44.04	173	93.5945
MRPL23	mRNA	491	45.49	172	93.0535
NIP1	mRNA	2438	51.335	172	93.0535
VPS60	mRNA	689	37.26	172	93.0535
RPB2	mRNA	3674	41	172	93.0535
TIM44	mRNA	1295	39.355	172	93.0535
HMX1	mRNA	953	44.615	172	93.0535
PKR1	mRNA	368	42.745	172	93.0535
TIM9	mRNA	263	43.09	171	92.5124
PMU1	mRNA	887	39.14	171	92.5124
HLJ1	mRNA	674	44.28	171	92.5124
GET2	mRNA	857	39.71	171	92.5124
CDC34	mRNA	887	42.8	171	92.5124
OXA1	mRNA	1208	45.27	171	92.5124
DLD1	mRNA	1763	38.985	170	91.9714
STP3	mRNA	1031	45.075	170	91.9714
WHI2	mRNA	1460	50.81	170	91.9714
MIC60	mRNA	1622	40.645	170	91.9714
GIM4	mRNA	336	31.275	170	91.9714
AGA2	mRNA	263	52.275	170	91.9714
ATP11	mRNA	956	42.5	169	91.4304
FRD1	mRNA	1412	39.14	169	91.4304
HAM1	mRNA	593	44.92	169	91.4304
HAL5	mRNA	2567	42.21	169	91.4304
GIR2	mRNA	797	38.48	169	91.4304
JIP5	mRNA	1478	43.83	169	91.4304
MRPL49	mRNA	485	42.86	169	91.4304
HSP78	mRNA	2435	37.9	169	91.4304
CYB5	mRNA	362	43.81	169	91.4304
GAS2	mRNA	1667	45.685	168	90.8894
DIC1	mRNA	896	35.55	168	90.8894
SME1	mRNA	284	42.02	168	90.8894
CAB5	mRNA	725	40.685	168	90.8894
RRP46	mRNA	671	42.34	168	90.8894
RPA12	mRNA	377	38.045	168	90.8894
YCK1	mRNA	1616	41.465	168	90.8894
MRPL9	mRNA	809	48.105	168	90.8894
DCS1	mRNA	1052	45.925	168	90.8894
GIM5	mRNA	492	35.515	168	90.8894
RPA49	mRNA	1247	37.695	168	90.8894
UBC9	mRNA	474	35.32	167	90.3484
CRP1	mRNA	1397	28.75	167	90.3484
ASH1	mRNA	1766	47.71	167	90.3484
PIR3	mRNA	977	44.86	167	90.3484
MMS2	mRNA	414	36.54	167	90.3484
CMP2	mRNA	1814	42.38	167	90.3484
YLF2	mRNA	1217	34.09	167	90.3484
MRPL6	mRNA	644	38.395	166	89.8074
BAR1	mRNA	1763	51.005	166	89.8074
RET2	mRNA	1640	35.17	166	89.8074
GNT1	mRNA	1475	40.23	166	89.8074
PLP2	mRNA	860	35.83	166	89.8074
NOP6	mRNA	677	28.62	165	89.2664
MRPL27	mRNA	440	40.85	165	89.2664
LYS20	mRNA	1286	41.67	165	89.2664
SRB6	mRNA	365	39.93	165	89.2664
IES6	mRNA	500	45.07	165	89.2664
YGK1	mRNA	647	40.64	165	89.2664
PDX1	mRNA	1232	37.92	165	89.2664
YDL012C	mRNA	324	41.5	165	89.2664
ENT2	mRNA	1841	34.04	164	88.7254
MSC7	mRNA	1934	41.22	164	88.7254
SLA1	mRNA	3734	40.925	164	88.7254
COQ9	mRNA	782	45.99	164	88.7254
NNT1	mRNA	785	38.525	164	88.7254
BCP1	mRNA	851	36.965	164	88.7254
YPD1	mRNA	503	41.535	164	88.7254
ENT1	mRNA	1364	38.27	163	88.1844
YNL122C	mRNA	347	46.32	163	88.1844
ARO7	mRNA	770	40.11	163	88.1844
CAF16	mRNA	869	35.15	163	88.1844
FTR1	mRNA	1214	48.29	163	88.1844
EST3	mRNA	546	43.905	162	87.6434
ABP140	mRNA	1887	34.13	162	87.6434
EMC2	mRNA	878	44.865	162	87.6434
TRP3	mRNA	1454	38.34	162	87.6434
GPX2	mRNA	488	36.305	162	87.6434
ALG5	mRNA	1004	42.21	162	87.6434
MYO4	mRNA	4415	42.58	162	87.6434
SRP101	mRNA	1865	38.78	162	87.6434
UTR4	mRNA	683	36.44	161	87.1024
MTC4	mRNA	2084	44	161	87.1024
GRE3	mRNA	983	43.3	161	87.1024
ISU2	mRNA	470	48.64	161	87.1024
POB3	mRNA	1658	41.37	161	87.1024
YBR137W	mRNA	539	36.62	161	87.1024
RKI1	mRNA	776	35.13	161	87.1024
YMR31	mRNA	371	46.14	161	87.1024
ARG7	mRNA	1325	36.475	160	86.5614
PUN1	mRNA	791	46.525	160	86.5614
RSC8	mRNA	1673	35.04	160	86.5614
RNR1	mRNA	2666	54.45	160	86.5614
TFG2	mRNA	1202	39.76	160	86.5614
MAK31	mRNA	266	40.76	160	86.5614
ERP5	mRNA	638	45.48	160	86.5614
PAM18	mRNA	506	45.9	160	86.5614
DIM1	mRNA	956	32.315	160	86.5614
SEH1	mRNA	1049	37.405	160	86.5614
PFD1	mRNA	329	42.245	160	86.5614
LEU9	mRNA	1814	33.725	160	86.5614
NUP57	mRNA	1625	44.5	159	86.0203
TPO4	mRNA	1979	54.24	159	86.0203
CAR1	mRNA	1001	36.36	159	86.0203
VRG4	mRNA	1013	53.42	159	86.0203
PAN6	mRNA	929	42.8	159	86.0203
NAT1	mRNA	2564	41.32	159	86.0203
HCH1	mRNA	461	46.54	159	86.0203
TOM71	mRNA	1919	42	158	85.4793
GCD1	mRNA	1736	38.31	158	85.4793
ARI1	mRNA	1043	38.84	158	85.4793
TFB5	mRNA	218	35.93	158	85.4793
CRM1	mRNA	3254	41.545	158	85.4793
SEC27	mRNA	2670	41.88	158	85.4793
ERV2	mRNA	590	36.565	158	85.4793
MRM2	mRNA	962	43.1	158	85.4793
HUB1	mRNA	221	39.86	157	84.9383
ROX3	mRNA	662	44	157	84.9383
RIE1	mRNA	2345	43.25	157	84.9383
YOR283W	mRNA	692	43.36	157	84.9383
PRS5	mRNA	1490	41.06	157	84.9383
PRP42	mRNA	1634	48.78	157	84.9383
MFA1	mRNA	110	49.88	156	84.3973
PGM1	mRNA	1712	37.405	156	84.3973
OCH1	mRNA	1442	46.16	156	84.3973
GCY1	mRNA	938	40.385	156	84.3973
TRP1	mRNA	674	41.345	156	84.3973
CLN1	mRNA	1640	47.42	156	84.3973
GAD1	mRNA	1757	40.08	156	84.3973
SFT2	mRNA	647	38.19	155	83.8563
MIC27	mRNA	704	42.2	155	83.8563
CSM1	mRNA	572	35.84	155	83.8563
RTF1	mRNA	1676	34.96	155	83.8563
TIM21	mRNA	719	41.67	155	83.8563
GCN3	mRNA	917	41.09	155	83.8563
PRS2	mRNA	956	40.07	155	83.8563
CPR8	mRNA	926	39.22	155	83.8563
EDC2	mRNA	437	45.945	154	83.3153
MSS116	mRNA	1994	45.215	154	83.3153
KTR6	mRNA	1340	46.99	154	83.3153
MRPL22	mRNA	929	45.12	154	83.3153
SPO12	mRNA	521	45.69	154	83.3153
SMD3	mRNA	305	39.355	154	83.3153
RSM19	mRNA	275	42.725	154	83.3153
MIS1	mRNA	2927	31.365	154	83.3153
HEM12	mRNA	1088	39.695	154	83.3153
COA1	mRNA	593	39.095	154	83.3153
TIM54	mRNA	1436	38.17	154	83.3153
BUG1	mRNA	1025	42.68	154	83.3153
UBP16	mRNA	1499	46.22	154	83.3153
PSE1	mRNA	3269	41.895	154	83.3153
UTP30	mRNA	824	35.06	154	83.3153
TPS3	mRNA	3164	45.82	153	82.7743
YLH47	mRNA	1364	43.31	153	82.7743
AVT1	mRNA	1808	39.64	153	82.7743
SPF1	mRNA	3647	39.4	153	82.7743
HOT13	mRNA	350	37.89	153	82.7743
FUN14	mRNA	596	37.31	153	82.7743
AAH1	mRNA	1043	33.36	153	82.7743
NOP53	mRNA	1367	43.55	153	82.7743
MNN11	mRNA	1268	38.24	153	82.7743
RSM10	mRNA	611	45.57	153	82.7743
KEI1	mRNA	666	39.59	153	82.7743
PTC2	mRNA	1394	39.72	153	82.7743
XRN1	mRNA	4586	38.37	153	82.7743
PLB2	mRNA	2120	42.405	152	82.2333
NAB6	mRNA	3404	41.07	152	82.2333
NOP12	mRNA	1379	36.28	152	82.2333
YIM1	mRNA	1097	43.45	152	82.2333
TAT1	mRNA	1859	43.075	152	82.2333
SSA4	mRNA	1928	40.42	151	81.6923
COQ6	mRNA	1439	37.83	151	81.6923
TUM1	mRNA	914	34.31	151	81.6923
SPT15	mRNA	722	39.43	151	81.6923
RME1	mRNA	902	37.36	151	81.6923
CPA1	mRNA	1235	48.62	151	81.6923
TYW1	mRNA	2432	31.96	151	81.6923
GTT1	mRNA	704	49.32	151	81.6923
SFB3	mRNA	2789	40.96	151	81.6923
STP4	mRNA	1472	43.43	150	81.1513
YBR016W	mRNA	386	39.24	150	81.1513
TPO2	mRNA	1844	50.945	150	81.1513
AHA1	mRNA	1052	38.425	150	81.1513
ANP1	mRNA	1502	39.905	150	81.1513
SAM35	mRNA	989	37.165	150	81.1513
PAM1	mRNA	2492	45.185	150	81.1513
TOH1	mRNA	1190	58.635	150	81.1513
SEC18	mRNA	2276	38.62	150	81.1513
OPT1	mRNA	2399	45.365	150	81.1513
MGR2	mRNA	341	38.785	150	81.1513
SNX3	mRNA	488	40.435	150	81.1513
RPA43	mRNA	980	33.735	150	81.1513
YKR018C	mRNA	2177	40.595	150	81.1513
ENV9	mRNA	992	38.895	150	81.1513
VPS70	mRNA	2435	40.74	149	80.6103
PPE1	mRNA	1202	41.74	149	80.6103
BCS1	mRNA	1370	48.68	149	80.6103
ADP1	mRNA	3149	46.75	149	80.6103
YGL242C	mRNA	545	34.6	149	80.6103
STO1	mRNA	2586	43.7	149	80.6103
TPN1	mRNA	1739	47.585	148	80.0692
YFH1	mRNA	524	39.235	148	80.0692
NUP49	mRNA	1418	41.33	148	80.0692
GOT1	mRNA	417	38.41	148	80.0692
HIS7	mRNA	1658	42.07	148	80.0692
RPC11	mRNA	332	35.185	148	80.0692
MRPS16	mRNA	365	42.015	148	80.0692
HFD1	mRNA	1598	42.32	147	79.5282
MRPL16	mRNA	698	43.13	147	79.5282
REX2	mRNA	809	35.28	147	79.5282
SUN4	mRNA	1275	51.96	147	79.5282
APL2	mRNA	2180	47.42	147	79.5282
QRI1	mRNA	1433	36.33	147	79.5282
PBP1	mRNA	2168	42.07	147	79.5282
OAC1	mRNA	974	38.89	147	79.5282
MRP17	mRNA	395	41.04	147	79.5282
APE2	mRNA	2859	41.38	147	79.5282
VCX1	mRNA	1235	45.24	147	79.5282
PML39	mRNA	1004	49.11	147	79.5282
NOT5	mRNA	1682	42.74	147	79.5282
FAP7	mRNA	593	38.19	147	79.5282
ATG8	mRNA	353	38.75	146	78.9872
NMT1	mRNA	1367	38.65	146	78.9872
MRS6	mRNA	1811	44.91	146	78.9872
YDR514C	mRNA	1451	41.45	146	78.9872
CMC2	mRNA	330	44.395	146	78.9872
MPP10	mRNA	1781	36.585	146	78.9872
VMA22	mRNA	545	34.12	145	78.4462
PDE1	mRNA	1109	46.68	145	78.4462
KRE28	mRNA	1157	43.04	145	78.4462
EDE1	mRNA	4145	47.3	145	78.4462
SNF11	mRNA	509	51.08	145	78.4462
TRS33	mRNA	806	43.95	145	78.4462
RSA3	mRNA	662	39.04	145	78.4462
EMP70	mRNA	2003	43.12	145	78.4462
MGA2	mRNA	3341	40.04	145	78.4462
PNP1	mRNA	935	41.09	145	78.4462
YBL036C	mRNA	773	39.38	145	78.4462
URE2	mRNA	1064	35	145	78.4462
SSE2	mRNA	2081	41.77	145	78.4462
GAS3	mRNA	1574	40.31	144	77.9052
DEF1	mRNA	2216	39.155	144	77.9052
PRB1	mRNA	1907	44.89	144	77.9052
MRPL10	mRNA	968	45.655	144	77.9052
PTR2	mRNA	1805	55.04	144	77.9052
BXI1	mRNA	893	54.29	143	77.3642
GPI15	mRNA	690	48.97	143	77.3642
YJR142W	mRNA	1028	40.04	143	77.3642
VHR2	mRNA	1517	53.665	142	76.8232
RPN9	mRNA	1181	37.975	142	76.8232
AIM24	mRNA	1184	40.415	142	76.8232
CBP6	mRNA	488	47.205	142	76.8232
PWP1	mRNA	1730	36.745	142	76.8232
GRX7	mRNA	611	36.825	142	76.8232
PHO85	mRNA	918	41.63	142	76.8232
IZH4	mRNA	938	48.44	142	76.8232
SFK1	mRNA	1061	54.88	141	76.2822
RRP17	mRNA	707	42.56	141	76.2822
YPR147C	mRNA	914	39.27	141	76.2822
NVJ2	mRNA	2312	36.07	141	76.2822
PMT4	mRNA	2288	38.145	140	75.7412
PSG1	mRNA	1178	44.29	140	75.7412
ATG19	mRNA	1247	41.095	140	75.7412
PET123	mRNA	956	46.07	140	75.7412
CSI2	mRNA	1025	48.39	140	75.7412
NAB2	mRNA	1577	38.49	140	75.7412
AKR1	mRNA	2294	45.5	140	75.7412
PLB3	mRNA	2060	54.805	140	75.7412
PIN3	mRNA	647	49.67	140	75.7412
SER2	mRNA	929	39.195	140	75.7412
YAP1	mRNA	1952	49.555	140	75.7412
MED11	mRNA	395	42.45	140	75.7412
YJL068C	mRNA	899	42.83	140	75.7412
MSS51	mRNA	1310	46.28	139	75.2002
SQT1	mRNA	1295	36.38	139	75.2002
HST2	mRNA	1073	44.7	139	75.2002
RRP45	mRNA	917	40.65	139	75.2002
APS1	mRNA	470	45.03	139	75.2002
NDI1	mRNA	1541	49.88	139	75.2002
TAF10	mRNA	620	36	139	75.2002
PPN1	mRNA	2024	36.58	139	75.2002
SRP102	mRNA	734	38.12	139	75.2002
SSD1	mRNA	3752	47.9	138	74.6592
SYH1	mRNA	2549	45.325	138	74.6592
TML25	mRNA	683	41.62	138	74.6592
AME1	mRNA	974	41.685	138	74.6592
DGK1	mRNA	872	43.505	138	74.6592
TLG1	mRNA	674	38.37	138	74.6592
GPI17	mRNA	1604	35.89	138	74.6592
OSM1	mRNA	1505	37.49	138	74.6592
GAL83	mRNA	1253	41.305	138	74.6592
NOP13	mRNA	1211	34.525	138	74.6592
PGC1	mRNA	965	41.075	138	74.6592
HRK1	mRNA	2279	43.24	138	74.6592
APE4	mRNA	1472	37.305	138	74.6592
ISN1	mRNA	1352	45.09	138	74.6592
RBK1	mRNA	1001	44.795	138	74.6592
SIC1	mRNA	854	47.56	137	74.1182
PRM5	mRNA	956	48.75	137	74.1182
PTK2	mRNA	2456	40.3	137	74.1182
MCM1	mRNA	860	38	137	74.1182
CLB1	mRNA	1415	49.27	137	74.1182
SCM4	mRNA	563	41.31	137	74.1182
RSN1	mRNA	2861	45.81	137	74.1182
YOR342C	mRNA	959	49.22	137	74.1182
CHS1	mRNA	3395	47.03	137	74.1182
EHT1	mRNA	1355	45.35	137	74.1182
SNF6	mRNA	998	42.64	137	74.1182
SKG1	mRNA	1067	39.085	136	73.5771
PSD1	mRNA	1502	46.435	136	73.5771
MRPL8	mRNA	716	41.54	136	73.5771
GRX8	mRNA	329	43.625	136	73.5771
PEP12	mRNA	866	41.96	136	73.5771
CDC53	mRNA	2447	47.045	136	73.5771
BET1	mRNA	429	43.08	136	73.5771
FIG2	mRNA	4829	38.605	136	73.5771
HIP1	mRNA	1811	45	136	73.5771
MAM33	mRNA	800	46.81	136	73.5771
ALG6	mRNA	1634	43.185	136	73.5771
FMP46	mRNA	401	43.6	135	73.0361
NCL1	mRNA	2054	43.17	135	73.0361
ENA1	mRNA	3275	45.6	135	73.0361
HSE1	mRNA	1358	48	135	73.0361
SPP2	mRNA	557	44.29	135	73.0361
PPM1	mRNA	986	42	135	73.0361
TOA1	mRNA	860	44.88	135	73.0361
CWH41	mRNA	2501	36.175	134	72.4951
FCF2	mRNA	653	40.99	134	72.4951
UFD2	mRNA	2885	39.9	134	72.4951
GPA1	mRNA	1418	44.655	134	72.4951
TGL1	mRNA	1646	39.585	134	72.4951
EMI1	mRNA	563	39.88	134	72.4951
YKR011C	mRNA	1061	40.36	134	72.4951
BDF1	mRNA	2060	47.535	134	72.4951
HRB1	mRNA	1365	44.255	134	72.4951
KRE6	mRNA	2162	46.91	134	72.4951
BET3	mRNA	581	42.98	134	72.4951
ERG12	mRNA	1331	36.5	133	71.9541
RLI1	mRNA	1826	47.96	133	71.9541
BRE1	mRNA	2102	44.43	133	71.9541
RNQ1	mRNA	1217	39.68	133	71.9541
MRPL17	mRNA	845	43.75	133	71.9541
YOR131C	mRNA	656	35.39	133	71.9541
MRP49	mRNA	413	46.4	133	71.9541
YOL057W	mRNA	2135	43.25	133	71.9541
REH1	mRNA	1298	46.56	133	71.9541
SRM1	mRNA	1448	37.86	132	71.4131
DSD1	mRNA	1286	50.645	132	71.4131
RXT3	mRNA	884	45.25	132	71.4131
COS5	mRNA	1151	48.02	132	71.4131
SLA2	mRNA	2906	41.035	132	71.4131
CTR2	mRNA	569	43.16	132	71.4131
RCH1	mRNA	1304	46.955	132	71.4131
YIP1	mRNA	746	39.56	132	71.4131
RRP15	mRNA	752	37.34	132	71.4131
PKH2	mRNA	3245	43.625	132	71.4131
CDC1	mRNA	1475	43.49	132	71.4131
SKI6	mRNA	740	41.68	131	70.8721
SND1	mRNA	2633	50.45	131	70.8721
MRPS8	mRNA	467	45.13	131	70.8721
RCN2	mRNA	797	42.96	131	70.8721
TRM82	mRNA	1334	37.62	131	70.8721
TGL4	mRNA	2732	47	131	70.8721
MDE1	mRNA	734	37.72	131	70.8721
VPS35	mRNA	2834	44.04	131	70.8721
MAK11	mRNA	1406	33.71	131	70.8721
CYT2	mRNA	674	45.44	131	70.8721
YGL039W	mRNA	1046	48.14	131	70.8721
YML018C	mRNA	1181	42.22	131	70.8721
NHP10	mRNA	611	43.93	131	70.8721
CWH43	mRNA	2861	42.05	131	70.8721
EDC3	mRNA	1655	41.085	130	70.3311
AIM25	mRNA	983	45.49	130	70.3311
MRPL13	mRNA	794	44.245	130	70.3311
RFA2	mRNA	822	42.92	130	70.3311
DSE3	mRNA	1292	50.135	130	70.3311
PUT2	mRNA	1727	46.64	130	70.3311
CST6	mRNA	1763	43.56	130	70.3311
EAR1	mRNA	1652	52.55	130	70.3311
NOC2	mRNA	2132	37.56	130	70.3311
EFR3	mRNA	2348	43.495	130	70.3311
ERG8	mRNA	1355	42.65	129	69.7901
CKA1	mRNA	1118	39.54	129	69.7901
APL4	mRNA	2498	44.12	129	69.7901
APA2	mRNA	977	51.58	129	69.7901
DCP1	mRNA	695	44.33	129	69.7901
TSR2	mRNA	617	38.28	129	69.7901
IDP1	mRNA	1286	56.68	129	69.7901
APE1	mRNA	1544	32.28	129	69.7901
ANB1	mRNA	473	38.97	128	69.2491
UFD1	mRNA	1085	45.165	128	69.2491
DIB1	mRNA	431	41.42	128	69.2491
GCD7	mRNA	1145	37.61	128	69.2491
HMG2	mRNA	3137	44.91	128	69.2491
TMA16	mRNA	536	33.675	128	69.2491
PUF6	mRNA	1970	39.24	128	69.2491
ROT1	mRNA	770	43.625	128	69.2491
SUR1	mRNA	1148	54.785	128	69.2491
PMC1	mRNA	3521	47.1	128	69.2491
PEX19	mRNA	1028	43.51	128	69.2491
SFH5	mRNA	884	36.295	128	69.2491
EEB1	mRNA	1370	42.235	128	69.2491
ITR2	mRNA	1829	42.05	127	68.7081
PAR32	mRNA	887	30.44	127	68.7081
OST6	mRNA	998	40.46	127	68.7081
GLG1	mRNA	1850	40.04	127	68.7081
SRB7	mRNA	422	44.23	127	68.7081
OCA1	mRNA	716	39.73	127	68.7081
RTG2	mRNA	1766	34.28	127	68.7081
TCB2	mRNA	3536	42.55	127	68.7081
MTR2	mRNA	568	41.05	127	68.7081
MTH1	mRNA	1301	51.35	127	68.7081
ALG7	mRNA	1346	39.35	127	68.7081
MET12	mRNA	1973	42.88	127	68.7081
GRS2	mRNA	1856	30.59	127	68.7081
ARX1	mRNA	1781	34.75	126	68.1671
DLD2	mRNA	1592	40	126	68.1671
MRPL1	mRNA	857	51.315	126	68.1671
PHO89	mRNA	1724	50.865	126	68.1671
MSN5	mRNA	3674	44.075	126	68.1671
SHS1	mRNA	1655	39.155	126	68.1671
PEP1	mRNA	4739	42.185	126	68.1671
GSH2	mRNA	1475	34.97	126	68.1671
AFG1	mRNA	1529	44.665	126	68.1671
APM3	mRNA	1451	43.105	126	68.1671
DOA1	mRNA	2147	44.49	126	68.1671
HNM1	mRNA	1691	47.765	126	68.1671
VPS25	mRNA	608	43.245	126	68.1671
YNR061C	mRNA	659	43.795	126	68.1671
RFC2	mRNA	1061	27.455	126	68.1671
YHR112C	mRNA	1136	38.62	125	67.6261
MCH5	mRNA	1565	55.81	125	67.6261
MIM2	mRNA	263	33.4	125	67.6261
NDC1	mRNA	1967	41.08	125	67.6261
NAM7	mRNA	2915	44.29	125	67.6261
SEY1	mRNA	2330	41.03	125	67.6261
MHF2	mRNA	242	40.42	125	67.6261
MAE1	mRNA	2009	35.29	125	67.6261
GDS1	mRNA	1568	45.08	125	67.6261
SHP1	mRNA	1271	38.5	125	67.6261
HSP31	mRNA	713	50.11	125	67.6261
CBP4	mRNA	512	37.2	125	67.6261
RSM28	mRNA	1085	43.61	125	67.6261
TSC10	mRNA	962	40.61	124	67.085
MAF1	mRNA	1188	52.8	124	67.085
APM4	mRNA	1475	49.02	124	67.085
GRX6	mRNA	695	41.82	124	67.085
IRC6	mRNA	713	45.035	124	67.085
RML2	mRNA	1181	41.205	124	67.085
AIM2	mRNA	740	39.785	124	67.085
MHR1	mRNA	680	43.16	124	67.085
DCP2	mRNA	2912	44.915	124	67.085
ERV1	mRNA	570	34.62	124	67.085
IES4	mRNA	350	42.06	124	67.085
BER1	mRNA	824	44.79	124	67.085
GCD6	mRNA	2138	39	123	66.544
DSS4	mRNA	431	40.92	123	66.544
MIC12	mRNA	320	40.65	123	66.544
YPR127W	mRNA	1037	41.31	123	66.544
SLY1	mRNA	2000	39.04	123	66.544
YKL091C	mRNA	932	43.96	123	66.544
TFA1	mRNA	1448	46.12	123	66.544
IES3	mRNA	752	45.7	123	66.544
CMS1	mRNA	875	44.28	123	66.544
[truncated: 3,334 more rows]
